# Supplementary material for: Localized inhibition in the Drosophila mushroom body
Source: eLife. 2020 Sep 21;9:e56954. doi: 10.7554/eLife.56954 (PMC7541083; doi:10.7554/eLife.56954)
Supplement: Figure 1—source data 1. [file elife-56954-fig1-data1.xlsx]

## Sheet: Ark1
Fig. 1C
Electric shock				Odor
V	S	γ	H	V	S	γ	H
0.197395	0.10236	0.080775	0.055755	0.408504	0.34563	0.168172	0.129529
0.392785	-0.01277	0.046718	-0.03395	0.308685	0.385776	0.065488	0.279305
0.100697	-0.02417	-0.07453	-0.24678	0.213245	0.271194	0.100106	0.323835
0.272704	0.086154	0.075142	0.051675	0.144073	0.524922	0.174533	0.375164
0.282868	0.161301	0.133374	0.218462	0.317582	0.465474	0.552166	0.914515
0.677449	0.286322	0.229605	0.161652	0.34816	0.508891	0.096634	0.27145
0.279885	0.220947	0.031993	0.149869	0.199735	0.202847	0.044108	-0.0644
0.228052	0.003005	0.047896	0.049031	0.192816	0.161105	0.116367	0.151377
0.182181	-0.22656	-0.00355	-0.05371	0.444841	0.347745	0.169713	0.113323
0.214141	0.088984	0.103408	0.050155	0.412422	0.429923	0.024801	0.029679
0.163302	0.047587	0.068585	0.072659	-0.07013	0.075692	-0.07068	-0.01091
0.163828	0.053232	0.017002	0.166477	0.261267	0.342135	0.217089	0.246326
0.129907	0.165368	0.15935	0.211058	0.442432	0.480533	0.352771	0.229695
0.393659	0.085353	0.095642	0.106075
0.346792	0.020086	0.075459	0.041948
0.124539	0.104859	0.113322	0.239276
0.252487	0.316624	0.001674	0.083072
0.596148	0.290146	0.09944	0.323942
0.271444	0.249892	0.067485	0.16016
