# Supplementary material for: Localized inhibition in the Drosophila mushroom body
Source: eLife. 2020 Sep 21;9:e56954. doi: 10.7554/eLife.56954 (PMC7541083; doi:10.7554/eLife.56954)
Supplement: Figure 2—figure supplement 1—source data 1. [file elife-56954-fig2-figsupp1-data1.xlsx]

## Sheet: Sheet1
Calyx			Horizontal lobe			Vertical lobe
Before	+histamine		Before	+histamine		Before	+histamine
2.8601	0.05191		0.991	0.1736		0.8318	0.1298
0.2346	0.2951		0.6856	0.3654		1.5712	0.3487
1.1013	0.6633		0.5687	0.247		3.9657	1.375
1.7381	0.4789		1.6984	0.7165		1.2589	0.3764
2.2932	0.3884		2.0824	1.3635		1.2069	0.7886
4.1929	0.572		3.1013	1.6831		1.9038	0.898
1.377	1.4631		0.9192	0.8227		1.5966	1.4285
1.7445	0.4555		1.0103	0.741		0.6962	0.7234
