# Supplementary material for: Localized inhibition in the Drosophila mushroom body
Source: eLife. 2020 Sep 21;9:e56954. doi: 10.7554/eLife.56954 (PMC7541083; doi:10.7554/eLife.56954)
Supplement: Figure 3—source data 1. [file elife-56954-fig3-data1.xlsx]

## Sheet: Sheet1
853			mb247			c739			np3061
a	a'		a	a'		a	a'		a	a'
0.41882	1.06638		2.83338	0.22684		1.77702	-0.1418		0.93958	0.15526
0.11922	1.45054		1.41898	0.0753		0.16038	0.05356		0.78314	0.34728
0.07866	0.74982		1.44294	0.02688		1.36532	0.33196		1.8758	-0.00028
0.23594	1.72108		0.25894	0.03968		1.21916	0.01904		0.3023	-0.0169
0.32248	1.03228		1.42488	0.29352		0.62686	0.17686		0.84906	0.16974
									1.3853	0.06024
