# Supplementary material for: Localized inhibition in the Drosophila mushroom body
Source: eLife. 2020 Sep 21;9:e56954. doi: 10.7554/eLife.56954 (PMC7541083; doi:10.7554/eLife.56954)
Supplement: Figure 4—source data 1. [file elife-56954-fig4-data1.xlsx]

## Sheet: Ark1
Fig. 4D
Stim calyx		Stim lobe
Response calyx	Response lobe	Response calyx	Response lobe
4.39822	-0.0296634	-0.0374748	3.78048
1.60738	0.248332	-0.0539284	3.28542
1.01572	0.02886	0.067184	2.74836
0.890842	0.043369	-0.03278	0.844056
0.508322	0.097402	0.03355	1.28942
0.441839	0.03928	-0.07315	0.668469
1.76649	0.112565	-0.0548	1.74697
1.06134	-0.03073	0.014011	3.3986
3.68541	0.006208	0.037544	1.64523
2.86853	-0.00326	-0.04391	3.69712
4.5247	0.173364	0.025584	2.29675
Fig. 4E
Stim calyx		Stim lobe
Response calyx	Response lobe	Response calyx	Response lobe
3.69676	1.01835	0.114291	2.30422
1.54797	1.0809	-0.0233635	3.2383
0.250641	0.127491	-0.0162879	3.86358
2.49554	0.743788	0.085319	1.08632
0.818223	1.01274	0.094516	2.61289
1.39517	1.39467	-0.0266	4.53846
4.34277	0.739803	0.203901	1.92427
3.8777	1.33617	0.196972	4.28795
0.895163	0.085747	0.028402	0.991219
0.857252	0.106317	0.121933	0.91013
0.615691	0.469212	0.111407	2.42424
Fig. 4F
Stim calyx		Stim lobe
Response calyx	Response lobe	Response calyx	Response lobe
-0.029	0.041015	0.040302	0.026068
-0.01636	-0.03332	0.046099	0.066412
0.052316	-0.01853	0.018153	0.036724
-0.21137	-0.04791	-0.01312	-0.02833
-0.10301	0.191429	0.018814	-0.07961
-0.01325	0.184162	-0.06984	-0.10349
-0.00833	0.006552	0.056816	-0.11121
-0.04324	0.04475	0.110548	0.05176
