# Supplementary material for: Localized inhibition in the Drosophila mushroom body
Source: eLife. 2020 Sep 21;9:e56954. doi: 10.7554/eLife.56954 (PMC7541083; doi:10.7554/eLife.56954)
Supplement: Figure 7—source data 1. [file elife-56954-fig7-data1.xlsx]

## Sheet: Fig 7
	Top panel A1
Distance	Horizontal branch (blue)											Vertical branch (green)
0	0.0772935	0.156289	0.110537	-0.234014	-0.0621128	0.0834779	-0.0141141	-0.073695	-0.0611431	-0.0348004		0.0772935	0.156289	0.110537	-0.234014	-0.0621128	0.0834779	-0.0141141	-0.073695	-0.0611431	-0.0348004
20	0.114233	0.0280396	0.239778	0.18831	-0.0852233	0.108409	0.0325109	-0.151915	-0.0800517	-0.115552		0.114233	0.0280396	0.239778	0.18831	-0.0852233	0.108409	0.0325109	-0.151915	-0.0800517	-0.115552
40	0.314146	1.28756	0.334515	-0.237677	-0.000322146	0.0632333	0.0661316	0.455939	0.0369391	0.00563487		0.314146	1.28756	0.334515	-0.237677	-0.000322146	0.0632333	0.0661316	0.455939	0.0369391	0.00563487
60	0.0930076	-0.172601	0.0852179	0.181059	0.136201	0.0550234	-0.102785	-0.0219253	0.0518558	-0.15504		0.0930076	-0.172601	0.0852179	0.181059	0.136201	0.0550234	-0.102785	-0.0219253	0.0518558	-0.15504
80	0.10223	0.0443409	0.0771104	0.20571	0.543285	0.0198513	0.0887303	-0.0431504	-0.110812	-0.125788		0.10223	0.0443409	0.0771104	0.20571	0.543285	0.0198513	0.0887303	-0.0431504	-0.110812	-0.125788
100	0.279508	-0.120455	-0.0226795	0.398222	-0.216452	0.0914346	-0.208371	-0.188709	-0.0378172	-0.104024		0.279508	-0.120455	-0.0226795	0.398222	-0.216452	0.0914346	-0.208371	-0.188709	-0.0378172	-0.104024
120	0.16013	-0.0839843	0.0523191	0.113872	0.0823358	-0.14906	0.410397	0.238227	0.0339493	-0.0168615		0.16013	-0.0839843	0.0523191	0.113872	0.0823358	-0.14906	0.410397	0.238227	0.0339493	-0.0168615
140	0.132818	0.189743	-0.0580725	0.292517	0.0245219	0.117524	0.563056	0.169224	0.041712	-0.0440123		0.132818	0.189743	-0.0580725	0.292517	0.0245219	0.117524	0.563056	0.169224	0.041712	-0.0440123
160	0.174837	0.760976	0.0802349	0.196886	0.134827	0.346501	1.60831	0.125976	0.497075	0.172246		0.174837	0.760976	0.0802349	0.196886	0.134827	0.346501	1.60831	0.125976	0.497075	0.172246
180	0.883693	0.238544	0.742175	0.0549696	0.397382	0.411049	0.702634	0.41914	0.822873	0.41475		0.883693	0.238544	0.742175	0.0549696	0.397382	0.411049	0.702634	0.41914	0.822873	0.41475
200	0.465728	0.883747	0.856004	0.851371	0.930345	0.423633	0.968055	0.401918	0.872542	1.16985		1.73474	-0.751549	1.06454	0.987933	0.661316	0.390944	1.8984	0.511792	1.42843	1.20988
220	0.342515	0.697409	0.841944	0.988903	1.06508	0.930022	0.340425	0.650649	0.714109	0.956526		1.08037	-0.409417	0.229424	0.343953	0.153553	1.34132	0.97398	2.97678	2.06702	1.24301
240	0.0915423	0.371045	0.268109	0.293336	0.504579	0.621774	0.0556914	0.316581	0.134035	0.346717		0.186382	1.15364	0.205619	0.371556	-0.0759037	0.539245	0.348446	0.54447	0.438905	0.0355761
260												0.132382	0.481377	-0.0522006	0.0686904	0.133809	0.107003	0.107149	0.0685827	0.112089	0.0414211
	Top panel A2
Distance	Horizontal branch (blue)											Vertical branch (green)
0	-0.0772786	0.0134625	-0.180983	-0.151878	-0.155148	-0.363645	-0.0458586	0.0823503	-0.342441	0.194772		-0.0772786	0.0134625	-0.180983	-0.151878	-0.155148	-0.363645	-0.0458586	0.0823503	-0.342441	0.194772
20	-0.177078	0.131101	-0.334768	-0.277331	-0.0669718	-0.30866	-0.0513072	0.1403	-0.0336902	0.371355		-0.177078	0.131101	-0.334768	-0.277331	-0.0669718	-0.30866	-0.0513072	0.1403	-0.0336902	0.371355
40	-0.149835	0.119528	-0.474796	-0.0685609	-0.155102	-0.403692	0.00974383	0.0867954	-0.110379	0.541177		-0.149835	0.119528	-0.474796	-0.0685609	-0.155102	-0.403692	0.00974383	0.0867954	-0.110379	0.541177
60	-0.119596	0.198155	-0.221211	-0.0799121	-0.519474	-0.428438	-0.323417	0.230596	-0.0958945	0.172583		-0.119596	0.198155	-0.221211	-0.0799121	-0.519474	-0.428438	-0.323417	0.230596	-0.0958945	0.172583
80	-0.573869	-0.0349615	-0.0701955	-0.47811	-0.0585719	-0.564425	0.0178531	-0.343486	-0.374179	0.112186		-0.573869	-0.0349615	-0.0701955	-0.47811	-0.0585719	-0.564425	0.0178531	-0.343486	-0.374179	0.112186
100	-0.515342	0.0504309	0.0823367	-0.35016	-0.301532	-0.0410004	-0.0859055	-0.296265	-0.451821	-0.123955		-0.515342	0.0504309	0.0823367	-0.35016	-0.301532	-0.0410004	-0.0859055	-0.296265	-0.451821	-0.123955
120	-0.702818	0.0438381	-0.293813	-0.30975	-0.364826	-0.430753	0.301291	-0.0419539	-0.285913	0.111291		-0.702818	0.0438381	-0.293813	-0.30975	-0.364826	-0.430753	0.301291	-0.0419539	-0.285913	0.111291
140	-0.678753	0.147265	-0.0839531	-0.397063	-0.600884	-0.549804	-0.190518	-0.227749	-0.458586	0.153713		-0.678753	0.147265	-0.0839531	-0.397063	-0.600884	-0.549804	-0.190518	-0.227749	-0.458586	0.153713
160	-0.857875	0.14668	-0.431979	-0.658594	-0.751219	-0.236195	-0.10552	-0.332271	-0.641295	0.341765		-0.857875	0.14668	-0.431979	-0.658594	-0.751219	-0.236195	-0.10552	-0.332271	-0.641295	0.341765
180	-1.83961	0.139805	-0.546444	-0.957265	-1.14869	-0.655779	0.142652	-0.844344	-1.36241	0.124835		-1.83961	0.139805	-0.546444	-0.957265	-1.14869	-0.655779	0.142652	-0.844344	-1.36241	0.124835
200	-1.65786	-0.0955767	-0.438064	-0.818327	-1.5898	-0.907411	-0.0420901	-0.9421	-1.34075	-0.147656		-1.3181	-0.130493	-0.491913	-1.18347	-1.02796	-1.04235	-0.556933	-1.32282	-1.04889	-0.538907
220	-1.42975	0.00572098	-0.398471	-1.12785	-1.3324	-0.910816	-1.09652	-0.957674	-0.700275	-0.507896		-0.94714	-0.118461	-0.791902	-0.941101	-0.379265	-0.50608	-0.97016	-0.586173	-0.431934	-0.445328
240	-1.65282	-0.171902	-0.362329	-1.13366	-1.37031	-1.0034	-0.874629	-1.34257	-1.3195	-0.768882		-2.14214	0.112204	-0.713806	-0.945006	-0.382261	-0.4797	-0.309523	-0.798849	-1.06206	-0.401195
260												-0.566559	0.0648968	-0.513798	-0.61269	-0.664542	-0.454455	-0.506534	-0.934517	-0.569601	0.0464307
	Top panel A3
Distance	Horizontal branch (blue)														Vertical branch (green)
0	-0.0283779	0.061446	-0.0836807	0.0500041	-0.00980739	-0.0925346	-0.284142	-0.0163003	-0.0261985	-0.137213	-0.0717393	0.0135079	-0.0679253		-0.0283779	0.061446	-0.0836807	0.0500041	-0.00980739	-0.0925346	-0.284142	-0.0163003	-0.0261985	-0.137213	-0.0717393	0.0135079	-0.0679253
20	-0.128223	0.0396791	-0.00803661	0.0420583	-0.259215	0.0377221	-0.169314	0.00986642	-0.0553482	-0.0320102	-0.0148927	-0.0157554	-0.00853606		-0.128223	0.0396791	-0.00803661	0.0420583	-0.259215	0.0377221	-0.169314	0.00986642	-0.0553482	-0.0320102	-0.0148927	-0.0157554	-0.00853606
40	-0.147066	0.176778	-0.0521699	-0.0167997	0.00778235	-0.100934	-0.204729	-0.0365961	-0.115191	-0.228658	-0.0931702	-0.0345075	-0.161368		-0.147066	0.176778	-0.0521699	-0.0167997	0.00778235	-0.100934	-0.204729	-0.0365961	-0.115191	-0.228658	-0.0931702	-0.0345075	-0.161368
60	-0.111332	0.140055	-0.213674	-0.0301487	0.0921804	-0.137939	-0.728381	-0.0267887	-0.104431	-0.319376	-0.518702	-0.0600249	-0.145113		-0.111332	0.140055	-0.213674	-0.0301487	0.0921804	-0.137939	-0.728381	-0.0267887	-0.104431	-0.319376	-0.518702	-0.0600249	-0.145113
80	-0.0194332	0.0925437	-0.150879	0.0608512	-0.0574822	-0.217715	-0.480381	0.0481289	-0.0870406	-0.258352	-0.153422	-0.136486	0.0111241		-0.0194332	0.0925437	-0.150879	0.0608512	-0.0574822	-0.217715	-0.480381	0.0481289	-0.0870406	-0.258352	-0.153422	-0.136486	0.0111241
100	-0.149926	0.169663	-0.153604	0.0313383	-0.0725111	-0.295266	-0.46458	-0.037141	-0.202096	-0.105566	-0.390253	-0.0842709	-0.268659		-0.149926	0.169663	-0.153604	0.0313383	-0.0725111	-0.295266	-0.46458	-0.037141	-0.202096	-0.105566	-0.390253	-0.0842709	-0.268659
120	0.246107	0.222137	-0.213674	0.0277195	0.0176624	-0.209043	-0.529917	-0.0106701	-0.231291	-0.163684	-0.258261	-0.115101	-0.0550758		0.246107	0.222137	-0.213674	0.0277195	0.0176624	-0.209043	-0.529917	-0.0106701	-0.231291	-0.163684	-0.258261	-0.115101	-0.0550758
140	-0.0313292	0.0319376	-0.160732	0.00254266	-0.107155	-0.229747	-0.28723	-0.137485	-0.061387	-0.0869044	-0.215082	-0.15828	-0.0660183		-0.0313292	0.0319376	-0.160732	0.00254266	-0.107155	-0.229747	-0.28723	-0.137485	-0.061387	-0.0869044	-0.215082	-0.15828	-0.0660183
160	0.154898	-0.00417722	-0.120867	0.173282	-0.0939421	-0.0973929	-0.780414	-0.0866774	-0.0833628	0.0121548	-0.338764	-0.0777781	-0.130266		0.154898	-0.00417722	-0.120867	0.173282	-0.0939421	-0.0973929	-0.780414	-0.0866774	-0.0833628	0.0121548	-0.338764	-0.0777781	-0.130266
180	-0.0395928	-0.268841	-0.297491	-0.0744181	-0.0872676	-0.498088	-0.600476	0.126216	-0.438745	-0.303303	-0.756259	-0.401694	-1.01343		-0.0395928	-0.268841	-0.297491	-0.0744181	-0.0872676	-0.498088	-0.600476	0.126216	-0.438745	-0.303303	-0.756259	-0.401694	-1.01343
200	-0.148201	-0.136486	-0.725293	-0.11787	-0.318922	-1.07554	-0.666085	-0.439744	-0.408959	-0.497544	-0.90959	-0.640977	-0.812515		0.0236059	-0.192924	-0.508259	-0.0125771	0.0591622	-0.927752	-0.89833	-0.76534	-0.476113	-0.335313	-0.90278	-0.703226	-0.292769
220	-0.232335	-0.025699	-0.592893	-0.047811	-0.0404555	-0.636482	-0.570554	-0.392432	-0.402648	-0.302395	-0.544764	-0.353747	-0.746542		-0.0736917	-0.100117	-0.678935	-0.0558477	-0.187566	-0.6279	-0.894743	-0.210087	-0.0883574	-0.139074	-0.457361	-0.264164	-0.11619
240	-0.122411	-0.131083	-0.472526	-0.0953497	-0.0656551	-0.89547	-1.09589	-0.673078	-0.539543	-0.323644	-0.989684	-0.670535	-0.721161		-0.0185705	0.0195785	-0.629671	0.00704679	-0.106292	-0.743682	-0.375496	-0.0777327	-0.16945	-0.0368231	-0.441469	-0.14643	-0.047811
260															-0.0199326	-0.0464035	-0.354474	0.0522516	-0.0232018	-0.504581	-0.494729	-0.00240644	0.00912178	0.00820461	-0.296447	-0.140754	0.0265254
	Top panel A4
Distance	Horizontal branch (blue)											Vertical branch (green)
0	-0.464266	-0.0169164	-0.242424	-0.524586	-0.377176	-0.33763	-0.614272	-0.256535	0.186036	-0.198886		-0.464266	-0.0169164	-0.242424	-0.524586	-0.377176	-0.33763	-0.614272	-0.256535	0.186036	-0.198886
20	-0.403545	-0.041089	-0.212182	-0.422435	-0.369742	-0.321263	-0.70197	-0.407937	0.439499	-0.279016		-0.403545	-0.041089	-0.212182	-0.422435	-0.369742	-0.321263	-0.70197	-0.407937	0.439499	-0.279016
40	-0.451282	0.127627	-0.267947	-0.506423	-0.0117376	-0.296081	-0.572041	-0.253597	0.919969	-0.288113		-0.451282	0.127627	-0.267947	-0.506423	-0.0117376	-0.296081	-0.572041	-0.253597	0.919969	-0.288113
60	-0.504464	1.13907	-0.218815	-0.674726	-0.0902949	-0.370038	-0.441429	-0.152707	1.25622	-0.275351		-0.504464	1.13907	-0.218815	-0.674726	-0.0902949	-0.370038	-0.441429	-0.152707	1.25622	-0.275351
80	-0.853966	-0.0423058	-0.230107	-0.389062	-0.433356	-0.307878	-0.466031	-0.366774	-0.151268	-0.334351		-0.853966	-0.0423058	-0.230107	-0.389062	-0.433356	-0.307878	-0.466031	-0.366774	-0.151268	-0.334351
100	-0.951146	-0.0294108	-0.0990202	-0.460022	-0.430566	-0.557365	-0.198589	-0.414793	-0.290591	-0.351074		-0.951146	-0.0294108	-0.0990202	-0.460022	-0.430566	-0.557365	-0.198589	-0.414793	-0.290591	-0.351074
120	-1.33564	-0.0905175	-0.273956	-0.559621	-0.410193	-0.766535	-0.650717	-0.52006	-0.358835	-0.225448		-1.33564	-0.0905175	-0.273956	-0.559621	-0.410193	-0.766535	-0.650717	-0.52006	-0.358835	-0.225448
140	-1.02506	-0.104793	-0.258435	-0.666402	-0.479268	-0.854084	-0.484669	-0.46431	-0.537169	-0.366195		-1.02506	-0.104793	-0.258435	-0.666402	-0.479268	-0.854084	-0.484669	-0.46431	-0.537169	-0.366195
160	-0.913381	-0.191556	-0.346875	-0.71034	-0.405503	-0.782368	-0.367145	-0.482918	-0.549575	-0.435463		-0.913381	-0.191556	-0.346875	-0.71034	-0.405503	-0.782368	-0.367145	-0.482918	-0.549575	-0.435463
180	-2.39515	0.0200815	-0.488245	-0.546518	-0.580291	-0.601006	-0.295962	-0.66931	-0.820177	-0.531367		-2.39515	0.0200815	-0.488245	-0.546518	-0.580291	-0.601006	-0.295962	-0.66931	-0.820177	-0.531367
200	-1.7041	-0.105534	-0.615504	-0.425655	-0.822908	-1.21884	-0.428103	-1.0005	-0.774414	-0.483601		-1.31046	-0.242676	-0.436324	-1.16895	-0.723368	-1.51283	-0.654812	-0.956414	-0.928175	-0.516795
220	-1.86318	-0.105475	-0.848579	-0.915176	-0.74343	-1.1339	-0.998185	-1.06124	-0.69694	-0.516795		-1.01982	-0.159133	-0.249902	-0.855138	-0.404806	-0.608114	-0.621692	-0.355823	-0.249071	-0.318162
240	-2.054	-0.233654	-0.632613	-1.14148	-0.80151	-1.32147	-1.34614	-0.955879	-0.988792	-0.524452		-1.97684	0.000868077	-0.288261	-0.592444	-0.241697	-0.500487	-0.555748	-0.524289	-0.679445	-0.348566
260												-1.01461	-0.14238	-0.222985	-0.657053	-0.534157	-0.448136	-0.509777	-0.517344	-0.566031	-0.304584
	Top panel A5
Distance	Horizontal branch (blue)														Vertical branch (green)
0	-0.342349	0.701199	-0.244768	-0.114022	-0.308783	-0.278675	-0.493098	-0.335909	-0.386035	-0.173111	-0.222198	0.0276227	-0.452335		-0.342349	0.701199	-0.244768	-0.114022	-0.308783	-0.278675	-0.493098	-0.335909	-0.386035	-0.173111	-0.222198	0.0276227	-0.452335
20	-0.344515	0.233891	-0.301097	-0.119617	-0.103694	-0.433193	-0.53386	-0.320892	-0.402862	-0.181495	-0.31693	0.0421693	-0.276256		-0.344515	0.233891	-0.301097	-0.119617	-0.103694	-0.433193	-0.53386	-0.320892	-0.402862	-0.181495	-0.31693	0.0421693	-0.276256
40	-0.286065	0.622167	-0.254324	-0.261625	-0.127793	-0.278156	-0.630269	-0.307834	-0.433089	-0.299375	-0.197373	0.00969131	-0.308412		-0.286065	0.622167	-0.254324	-0.261625	-0.127793	-0.278156	-0.630269	-0.307834	-0.433089	-0.299375	-0.197373	0.00969131	-0.308412
60	-0.499345	1.14944	-0.24367	-0.283869	-0.355541	-0.190962	-0.675053	-0.251223	-0.40307	-0.150927	-0.213562	0.0831529	-0.339144		-0.499345	1.14944	-0.24367	-0.283869	-0.355541	-0.190962	-0.675053	-0.251223	-0.40307	-0.150927	-0.213562	0.0831529	-0.339144
80	-0.306617	0.541339	-0.269341	-0.156595	-0.451133	-0.243522	-0.64349	-0.204955	-0.396422	-0.0712714	-0.2326	0.0682695	-0.273081		-0.306617	0.541339	-0.269341	-0.156595	-0.451133	-0.243522	-0.64349	-0.204955	-0.396422	-0.0712714	-0.2326	0.0682695	-0.273081
100	-0.335701	1.17833	-0.329172	-0.0769695	-0.207092	-0.258361	-0.83834	-0.265483	-0.332808	-0.0983079	-0.123534	0.0947466	-0.12487		-0.335701	1.17833	-0.329172	-0.0769695	-0.207092	-0.258361	-0.83834	-0.265483	-0.332808	-0.0983079	-0.123534	0.0947466	-0.12487
120	-0.306721	0.399123	-0.393721	0.0405088	-0.461847	-0.133907	-0.768968	-0.332763	-0.343224	-0.074625	-0.176435	0.0480663	-0.389715		-0.306721	0.399123	-0.393721	0.0405088	-0.461847	-0.133907	-0.768968	-0.332763	-0.343224	-0.074625	-0.176435	0.0480663	-0.389715
140	-0.566951	0.605132	-0.376538	-0.0928324	-0.325136	-0.326679	-0.717388	-0.207419	-0.323741	-0.12711	-0.214111	0.0949321	-0.327658		-0.566951	0.605132	-0.376538	-0.0928324	-0.325136	-0.326679	-0.717388	-0.207419	-0.323741	-0.12711	-0.214111	0.0949321	-0.327658
160	-0.343328	0.0211559	-0.440286	-0.125552	-0.540909	-0.282815	-1.10599	-0.208695	-0.365305	-0.103056	-0.240702	0.0312923	-0.371611		-0.343328	0.0211559	-0.440286	-0.125552	-0.540909	-0.282815	-1.10599	-0.208695	-0.365305	-0.103056	-0.240702	0.0312923	-0.371611
180	-0.621262	-0.830372	-0.494047	-0.254977	-0.558359	-0.412225	-0.84757	0.250214	-0.573525	-0.130716	-0.445316	-0.125077	-0.743505		-0.621262	-0.830372	-0.494047	-0.254977	-0.558359	-0.412225	-0.84757	0.250214	-0.573525	-0.130716	-0.445316	-0.125077	-0.743505
200	-0.465393	-1.3106	-0.59473	-0.258197	-0.504583	-0.667752	-0.601348	-0.454947	-0.547171	-0.132467	-0.416603	-0.137379	-0.79734		-0.373021	-0.365067	-0.836025	-0.0363109	-0.507951	-0.683986	-0.939497	-0.62506	-0.531768	-0.107953	-0.321753	-0.196334	-0.407388
220	-0.998126	-0.230805	-0.914642	-0.26345	-0.607684	-0.587607	-1.17208	-0.683986	-0.525951	-0.0665526	-0.334737	-0.0634364	-1.10335		-0.255704	-0.0658403	-0.572249	-0.378422	-0.573406	-0.395398	-0.754515	-0.297446	-0.313161	-0.0545034	-0.259192	-0.0205668	-0.471388
240	-0.578763	-0.259711	-0.858432	-0.242809	-0.460957	-0.557469	-1.22844	-0.525328	-0.491569	-0.0987679	-0.334544	-0.253033	-0.672322		-0.204659	0.231072	-0.49108	-0.0394567	-0.358063	-0.399746	-0.877218	-0.333891	-0.312938	-0.0706481	-0.241029	0.0346771	-0.373555
260															-0.297803	-0.0196913	-0.469756	-0.212182	-0.482518	-0.370573	-0.838919	-0.0316663	-0.214571	-0.107671	-0.266596	0.00323489	-0.401245
	Top panel B1
Distance	Horizontal branch (blue)											Vertical branch (green)
0	0.0426086	-0.0090274	-0.0364008	0.0296716	-0.016474	-0.0217896	0.0536837	0.0871493	-0.0055283	0.00986035		0.0426086	-0.0090274	-0.0364008	0.0296716	-0.016474	-0.0217896	0.0536837	0.0871493	-0.0055283	0.00986035
20	-0.0359802	0.0459325	-0.00452988	0.00410832	-0.0283949	-0.00498749	0.00314457	0.170629	0.0254182	0.0321344		-0.0359802	0.0459325	-0.00452988	0.00410832	-0.0283949	-0.00498749	0.00314457	0.170629	0.0254182	0.0321344
40	0.0622489	0.139391	0.0296444	0.118882	-0.01279	-0.0700097	0.0747939	-0.0283302	0.0157566	0.0359594		0.0622489	0.139391	0.0296444	0.118882	-0.01279	-0.0700097	0.0747939	-0.0283302	0.0157566	0.0359594
60	-0.0174493	0.0653181	-0.0799246	-0.0393499	-0.116566	-0.0823051	0.0884759	0.063178	0.0146297	-0.0330311		-0.0174493	0.0653181	-0.0799246	-0.0393499	-0.116566	-0.0823051	0.0884759	0.063178	0.0146297	-0.0330311
80	0.0817551	0.0161185	0.0887209	0.0619392	-0.0412265	-0.0565218	0.0566374	0.00977576	-0.011394	-0.0074327		0.0817551	0.0161185	0.0887209	0.0619392	-0.0412265	-0.0565218	0.0566374	0.00977576	-0.011394	-0.0074327
100	0.0315238	-0.0535496	-0.0115882	0.118655	-0.0693164	-0.0224969	-0.0628821	-0.0299943	0.0335267	0.0109535		0.0315238	-0.0535496	-0.0115882	0.118655	-0.0693164	-0.0224969	-0.0628821	-0.0299943	0.0335267	0.0109535
120	-0.0308217	0.0608668	0.214434	-0.00932323	0.0247881	0.0149149	0.230418	-0.0994771	-0.0354717	-0.0154293		-0.0308217	0.0608668	0.214434	-0.00932323	0.0247881	0.0149149	0.230418	-0.0994771	-0.0354717	-0.0154293
140	0.0375273	0.10684	0.172843	-0.0635292	-0.0335766	0.0482848	0.0958624	-0.106873	-0.0240269	-0.0564062		0.0375273	0.10684	0.172843	-0.0635292	-0.0335766	0.0482848	0.0958624	-0.106873	-0.0240269	-0.0564062
160	0.0257907	0.225565	0.0337564	0.0342473	0.0534156	0.0743871	0.153235	0.0910182	0.00767815	0.0475822		0.0257907	0.225565	0.0337564	0.0342473	0.0534156	0.0743871	0.153235	0.0910182	0.00767815	0.0475822
180	0.184334	0.0682579	0.0875653	0.0987699	-0.00232503	0.131588	0.099759	0.0578484	0.0396161	-0.0296753		0.184334	0.0682579	0.0875653	0.0987699	-0.00232503	0.131588	0.099759	0.0578484	0.0396161	-0.0296753
200	0.0466809	0.358055	0.030242	0.0991581	0.00763192	0.012876	0.0977113	0.0348066	-0.00462233	0.00553847		0.0263944	0.133613	0.0573769	0.0710313	0.15464	0.114125	0.313935	-0.0211564	-0.0285845	0.0164883
220	0.0192464	0.0249411	-0.00713225	0.032017	-0.0202042	-0.0291761	0.0267984	-0.00871771	0.00565218	-0.00384115		0.281195	1.10062	0.385544	0.428591	0.26926	0.410084	0.397649	0.151279	-0.0084265	0.037622
240	-0.0015947	0.00203891	0.0293592	0.00520844	-0.0281962	-0.0588468	0.0468981	0.0231842	0.00790325	0.00519272		0.964263	1.27539	0.934265	0.868304	0.673658	0.944665	0.722562	0.454583	0.0163917	0.0803638
260												1.26948	0.86137	1.29134	1.29023	1.53896	1.4638	1.14698	0.660715	0.0810802	0.39605
	Top panel B2
Distance	Horizontal branch (blue)											Vertical branch (green)
0	0.321071	0.127711	-0.209864	-0.147965	0.332512	-0.0708631	0.00989056	-0.0445166	-0.382479	0.172712		0.321071	0.127711	-0.209864	-0.147965	0.332512	-0.0708631	0.00989056	-0.0445166	-0.382479	0.172712
20	-0.217738	0.00807355	-0.167588	0.136263	-0.171767	-0.271824	-0.00763141	0.132968	-0.184123	0.10727		-0.217738	0.00807355	-0.167588	0.136263	-0.171767	-0.271824	-0.00763141	0.132968	-0.184123	0.10727
40	-0.394835	-0.388294	-0.183215	-0.0892754	-0.0585681	0.0654061	0.158079	-0.348077	-0.85484	1.00305		-0.394835	-0.388294	-0.183215	-0.0892754	-0.0585681	0.0654061	0.158079	-0.348077	-0.85484	1.00305
60	-0.222583	-0.0748	-0.390656	-0.165832	-0.278183	-0.279395	0.148504	-0.0735886	-0.879611	-0.415004		-0.222583	-0.0748	-0.390656	-0.165832	-0.278183	-0.279395	0.148504	-0.0735886	-0.879611	-0.415004
80	-0.547827	0.284391	-0.837517	-0.283937	-0.246204	-0.256743	-0.223128	-0.0506944	0.111691	-0.0179883		-0.547827	0.284391	-0.837517	-0.283937	-0.246204	-0.256743	-0.223128	-0.0506944	0.111691	-0.0179883
100	-0.26716	-0.0824314	-0.576596	-0.0546918	-0.334208	-0.242812	0.00823103	0.131188	-0.0882458	-0.130219		-0.26716	-0.0824314	-0.576596	-0.0546918	-0.334208	-0.242812	0.00823103	0.131188	-0.0882458	-0.130219
120	-0.831945	-0.0625655	-0.854173	-0.315008	0.359803	-0.542497	-0.0770409	0.158515	-0.072559	-0.182791		-0.831945	-0.0625655	-0.854173	-0.315008	0.359803	-0.542497	-0.0770409	0.158515	-0.072559	-0.182791
140	-1.18475	0.118463	-0.763202	-0.521965	-0.190361	-0.27249	-0.358313	0.0230214	-0.246265	0.00916981		-1.18475	0.118463	-0.763202	-0.521965	-0.190361	-0.27249	-0.358313	0.0230214	-0.246265	0.00916981
160	-0.924976	-0.0268311	-0.0956955	-0.565875	-0.462185	-0.407796	0.356357	-0.893966	-0.108172	0.453827		-0.924976	-0.0268311	-0.0956955	-0.565875	-0.462185	-0.407796	0.356357	-0.893966	-0.108172	0.453827
180	-2.005	0.0963678	-0.344625	-0.324396	-0.812685	-0.990025	-0.261164	-0.29817	-0.646369	0.373255		-2.005	0.0963678	-0.344625	-0.324396	-0.812685	-0.990025	-0.261164	-0.29817	-0.646369	0.373255
200	-1.6688	0.0317552	-0.442561	-0.110292	-0.00466364	-0.679438	-0.546918	-1.04084	-0.463578	-0.046273		-1.59709	-0.108415	-1.5152	-0.299079	-0.525053	-0.451889	-0.424876	-1.25428	-0.446256	-0.472603
220	-1.38819	0.00355527	-0.265161	-0.513788	0.0280061	-0.585499	-0.329968	-0.882579	-0.408584	-0.0242873		-1.48928	-0.0515423	-1.37826	-0.466364	-0.591556	-1.70665	-0.37824	-0.799784	-0.424634	-0.968402
240	-1.60126	-0.102358	-0.826555	-0.485624	-0.532261	-0.687191	-0.592222	-1.24556	-0.78973	-0.151114		-2.27162	-0.239602	-1.42683	-1.05162	-0.320641	-1.86849	-0.449042	-1.53603	-0.798331	-0.0377937
260												-0.680952	-0.000666235	-1.36699	-0.708753	-0.590344	-1.3375	-0.332088	-0.781493	-0.167104	-0.00896388
	Top panel B3
Distance	Horizontal branch (blue)														Vertical branch (green)
0	0.15837	0.00471815	-0.114653	0.16516	0.0338871	-0.0273762	-0.0249535	0.0358071	0.0307316	0.105859	-0.0522691	0.0708874	-0.10472		0.15837	0.00471815	-0.114653	0.16516	0.0338871	-0.0273762	-0.0249535	0.0358071	0.0307316	0.105859	-0.0522691	0.0708874	-0.10472
20	0.178987	-0.317249	0.0823769	-0.0379754	-0.0517846	0.0507065	-0.121982	0.00880035	-0.0219252	0.0527537	0.00762536	0.0480476	-0.0982999		0.178987	-0.317249	0.0823769	-0.0379754	-0.0517846	0.0507065	-0.121982	0.00880035	-0.0219252	0.0527537	0.00762536	0.0480476	-0.0982999
40	0.363183	-0.110777	0.0149539	-0.0709237	-0.0512395	-0.0330695	-0.16668	-0.158988	0.0826373	0.0774407	-0.215254	0.260764	0.0302531		0.363183	-0.110777	0.0149539	-0.0709237	-0.0512395	-0.0330695	-0.16668	-0.158988	0.0826373	0.0774407	-0.215254	0.260764	0.0302531
60	-0.132581	-0.0310102	-0.261285	-0.0425784	-0.124949	-0.225127	-0.0824314	0.0318097	-0.0299806	0.341875	-0.0737098	0.146735	0.042209		-0.132581	-0.0310102	-0.261285	-0.0425784	-0.124949	-0.225127	-0.0824314	0.0318097	-0.0299806	0.341875	-0.0737098	0.146735	0.042209
80	0.422459	-0.369518	-0.373939	0.164427	-0.474904	-0.372122	0.013785	0.148952	0.128032	0.136954	-0.18915	-0.160865	0.00809778		0.422459	-0.369518	-0.373939	0.164427	-0.474904	-0.372122	0.013785	0.148952	0.128032	0.136954	-0.18915	-0.160865	0.00809778
100	-0.111988	0.381456	-0.256137	0.203995	-0.387991	-0.283089	-0.331845	0.0108657	-0.0791608	0.271212	-0.0815229	-0.174493	0.0696033		-0.111988	0.381456	-0.256137	0.203995	-0.387991	-0.283089	-0.331845	0.0108657	-0.0791608	0.271212	-0.0815229	-0.174493	0.0696033
120	-0.072983	0.266597	-0.5749	0.289546	-0.420939	-0.0286481	-0.595493	-0.114774	-0.0683799	0.286517	0.0828735	-0.079827	0.538439		-0.072983	0.266597	-0.5749	0.289546	-0.420939	-0.0286481	-0.595493	-0.114774	-0.0683799	0.286517	0.0828735	-0.079827	0.538439
140	-0.0512395	0.0477266	-0.566239	0.532885	-0.258923	-0.133853	-0.260498	-0.0619598	0.0252018	0.147571	-0.106719	-0.147722	0.267003		-0.0512395	0.0477266	-0.566239	0.532885	-0.258923	-0.133853	-0.260498	-0.0619598	0.0252018	0.147571	-0.106719	-0.147722	0.267003
160	-0.028527	-0.274913	-0.498767	-0.0629895	0.156608	-0.0622021	-0.458006	-0.155293	-0.00926672	-0.0379148	-0.0126585	-0.195752	-0.141484		-0.028527	-0.274913	-0.498767	-0.0629895	0.156608	-0.0622021	-0.458006	-0.155293	-0.00926672	-0.0379148	-0.0126585	-0.195752	-0.141484
180	-0.857807	-0.383267	-0.409613	-0.226278	-0.241298	-0.830007	-0.656968	-0.420757	0.0269038	0.0225975	-0.331906	-0.262375	-0.490349		-0.857807	-0.383267	-0.409613	-0.226278	-0.241298	-0.830007	-0.656968	-0.420757	0.0269038	0.0225975	-0.331906	-0.262375	-0.490349
200	-0.904444	-0.208592	-1.03418	-0.581199	-0.436687	-1.08239	-0.660481	0.00987844	-0.102721	0.080681	-0.0502704	-0.728316	-0.322458		-1.20013	-0.405797	-1.08996	-0.338447	-0.281454	-1.04357	-1.04357	-0.634316	-0.329423	-0.034947	-0.0392473	-0.904504	-0.287632
220	-0.92116	-0.205745	-1.04369	-0.236392	-0.316461	-0.488713	-0.48084	-0.307134	-0.0551158	0.0971612	-0.047121	-0.44565	-0.221008		-0.822739	-0.581078	-1.59745	-0.602094	-0.693974	-0.923159	-1.17021	-0.293264	-0.276972	0.0536864	-0.204049	-0.638556	-0.134277
240	-0.895964	-0.353589	-1.02976	-0.423362	-0.297201	-0.954411	-0.311434	-0.459399	-0.303016	0.0709479	-0.115077	-0.740308	-0.383145		-1.10171	-0.698396	-1.5966	-0.222341	-0.886758	-1.0045	-1.24574	-0.117318	-0.356557	-0.0268917	-0.19127	-0.283271	-0.00157474
260															-0.601792	-0.289206	-0.894329	-0.33875	-0.471936	-0.848904	-0.951686	-0.0716505	-0.082492	0.00205321	-0.309254	-0.219009	0.0357102
	Top panel B4
Distance	Horizontal branch (blue)											Vertical branch (green)
0	-0.495412	-0.327707	-0.407002	-0.0239505	-0.681584	-0.206753	-0.325617	-0.628381	0.302111	-0.414785		-0.495412	-0.327707	-0.407002	-0.0239505	-0.681584	-0.206753	-0.325617	-0.628381	0.302111	-0.414785
20	-0.423535	-0.413871	-0.351109	-0.189227	-0.350508	-0.637731	-0.425807	-0.70906	0.699919	-1.11261		-0.423535	-0.413871	-0.351109	-0.189227	-0.350508	-0.637731	-0.425807	-0.70906	0.699919	-1.11261
40	-0.248646	-0.500453	-0.439284	0.120693	-0.63841	-0.489536	-0.69446	-0.808858	2.90462	-0.938327		-0.248646	-0.500453	-0.439284	0.120693	-0.63841	-0.489536	-0.69446	-0.808858	2.90462	-0.938327
60	-0.26672	-0.160001	-0.446963	-0.271082	-0.465089	-0.346198	-0.208999	-0.749047	1.9624	-0.06224		-0.26672	-0.160001	-0.446963	-0.271082	-0.465089	-0.346198	-0.208999	-0.749047	1.9624	-0.06224
80	-0.370776	-0.310834	-0.25071	-0.543601	-0.458194	-0.714858	-0.418572	-1.03933	-0.399689	-0.246975		-0.370776	-0.310834	-0.25071	-0.543601	-0.458194	-0.714858	-0.418572	-1.03933	-0.399689	-0.246975
100	-0.63478	-0.131245	-0.290749	-0.0282339	-0.320602	-0.739227	-0.450254	-0.570424	-0.214484	-0.653951		-0.63478	-0.131245	-0.290749	-0.0282339	-0.320602	-0.739227	-0.450254	-0.570424	-0.214484	-0.653951
120	-0.64938	-0.142345	-0.417763	0.179856	-0.614956	-0.698326	-0.625691	-0.651365	-0.204167	-0.318435		-0.64938	-0.142345	-0.417763	0.179856	-0.614956	-0.698326	-0.625691	-0.651365	-0.204167	-0.318435
140	-0.820403	-0.270873	-0.240968	-0.0145218	-0.477077	-0.726716	0.606441	-1.12024	-0.557757	-0.71969		-0.820403	-0.270873	-0.240968	-0.0145218	-0.477077	-0.726716	0.606441	-1.12024	-0.557757	-0.71969
160	-0.665364	-0.124532	-0.616601	-0.260452	-0.595889	-0.952457	-0.254027	-1.34065	-0.360485	-0.413453		-0.665364	-0.124532	-0.616601	-0.260452	-0.595889	-0.952457	-0.254027	-1.34065	-0.360485	-0.413453
180	-1.85087	-0.45566	-1.00187	-0.415046	-0.892332	-1.17593	-0.541172	-1.10507	-0.361948	-0.685763		-1.85087	-0.45566	-1.00187	-0.415046	-0.892332	-1.17593	-0.541172	-1.10507	-0.361948	-0.685763
200	-1.01329	-0.240628	-0.863837	0.345937	-0.719612	-1.11888	-0.473238	-1.45889	-0.516855	-0.511606		-1.19269	0.0898679	-0.957837	-0.372029	-0.745835	-1.28842	-0.799299	-1.38325	-0.886142	-0.320602
220	-0.990746	-0.0541172	-0.692788	-0.213387	-0.685893	-1.23754	-0.920175	-1.32255	-1.13293	-0.431736		-0.902153	-0.303704	-0.891627	0.0902858	-0.892724	-1.74656	-0.861957	-1.34222	-0.916701	0.0283253
240	-1.06889	-0.150781	-0.610046	-0.230625	-0.779266	-1.22325	-0.838006	-1.77315	-1.03664	-0.172747		-2.73955	-0.258571	-1.0264	-0.416639	-0.652096	-1.72506	-0.772136	-1.50371	-0.496039	-0.409796
260												-0.797575	-0.208685	-1.14166	-0.458768	-0.957367	-1.46132	-0.85258	-1.2618	-0.765241	-0.589595
	Top panel B5
Distance	Horizontal branch (blue)														Vertical branch (green)
0	-0.362104	-0.994455	-0.533728	-0.356097	0.1838	-0.530568	-0.650163	-0.252486	-0.430717	-0.295268	-0.172929	-0.257892	-0.551619		-0.362104	-0.994455	-0.533728	-0.356097	0.1838	-0.530568	-0.650163	-0.252486	-0.430717	-0.295268	-0.172929	-0.257892	-0.551619
20	-0.346616	-0.996492	-0.393995	-0.202783	-0.410554	-0.79243	-0.632351	-0.262776	-0.441452	-0.416039	-0.123592	-0.195365	-0.502908		-0.346616	-0.996492	-0.393995	-0.202783	-0.410554	-0.79243	-0.632351	-0.262776	-0.441452	-0.416039	-0.123592	-0.195365	-0.502908
40	-0.504815	-0.858692	-0.424867	-0.395771	-0.301014	-0.567473	-0.788329	-0.203592	-0.274138	-0.087862	-0.245669	-0.21195	-0.39073		-0.504815	-0.858692	-0.424867	-0.395771	-0.301014	-0.567473	-0.788329	-0.203592	-0.274138	-0.087862	-0.245669	-0.21195	-0.39073
60	-0.0953841	-0.478462	-0.421994	-0.402614	-0.28294	-0.410554	-0.535373	-0.0758998	-0.611143	-0.199492	-0.195861	-0.447381	-0.312009		-0.0953841	-0.478462	-0.421994	-0.402614	-0.28294	-0.410554	-0.535373	-0.0758998	-0.611143	-0.199492	-0.195861	-0.447381	-0.312009
80	-0.479976	-0.0974475	-0.412069	-0.334471	-0.491286	-0.661603	-0.378637	-0.0173426	-0.727343	-0.395797	-0.454302	-0.453597	-0.28563		-0.479976	-0.0974475	-0.412069	-0.334471	-0.491286	-0.661603	-0.378637	-0.0173426	-0.727343	-0.395797	-0.454302	-0.453597	-0.28563
100	-0.347269	-0.451037	-0.296469	-0.393734	-0.405487	-0.543496	-0.691718	0.258856	-0.497528	-0.206387	-0.277037	-0.0107869	0.030911		-0.347269	-0.451037	-0.296469	-0.393734	-0.405487	-0.543496	-0.691718	0.258856	-0.497528	-0.206387	-0.277037	-0.0107869	0.030911
120	-0.106067	-0.658286	-0.413035	-0.472036	-0.697464	-0.734734	-0.644966	0.0848976	-0.352336	-0.100556	-0.1699	-0.319871	-0.297279		-0.106067	-0.658286	-0.413035	-0.472036	-0.697464	-0.734734	-0.644966	0.0848976	-0.352336	-0.100556	-0.1699	-0.319871	-0.297279
140	-0.661002	-0.481465	-0.76814	-0.383495	-0.884236	-0.63525	-0.633291	0.183727	-0.436202	-0.629373	-0.0463339	-0.119152	0.80575		-0.661002	-0.481465	-0.76814	-0.383495	-0.884236	-0.63525	-0.633291	0.183727	-0.436202	-0.629373	-0.0463339	-0.119152	0.80575
160	-0.65348	-0.847017	-0.460884	-0.787258	0.0311644	-0.709374	-0.757562	0.19432	-0.475954	-0.135711	-0.0825861	-0.317964	-0.295659		-0.65348	-0.847017	-0.460884	-0.787258	0.0311644	-0.709374	-0.757562	0.19432	-0.475954	-0.135711	-0.0825861	-0.317964	-0.295659
180	-1.59922	-0.559089	-0.413087	-0.819854	-0.203932	-0.504214	-1.01182	1.87441	-0.483946	-0.340113	-0.428262	-0.410423	-0.623914		-1.59922	-0.559089	-0.413087	-0.819854	-0.203932	-0.504214	-1.01182	1.87441	-0.483946	-0.340113	-0.428262	-0.410423	-0.623914
200	-1.68528	-0.902728	-0.471775	-0.754193	-1.02405	-1.10248	-0.857647	0.0925738	-0.610516	-0.380753	-0.561439	-0.555458	-0.617098		-1.54221	-1.10616	-1.09956	-0.905914	-0.72016	-0.607355	-1.14338	0.0517038	-0.617986	-0.338363	-0.601087	-0.585103	-0.584058
220	-1.85931	-0.307883	-1.03823	-0.523829	-1.1291	-0.805776	-0.81531	-0.00425729	-0.537515	-0.589543	-0.330136	-0.428184	-0.329848		-1.51262	-1.11147	-1.3592	-1.42099	-1.4503	-1.13957	-1.05915	0.190669	-0.618665	-0.224827	-0.376417	-0.297879	-0.323293
240	-1.85312	-0.670536	-1.19397	-0.503822	-0.903798	-0.746644	-0.853808	-0.0496248	-0.591214	-0.428079	-0.648126	-0.625769	-0.481726		-1.43181	-1.21774	-1.52897	-1.59293	-1.90376	-1.14837	-1.4036	0.139124	-0.869348	-0.287014	-0.573428	-0.387047	-0.805123
260															-1.85077	-1.09828	-1.59886	-2.21818	-2.2345	-1.51228	-1.52531	-0.14305	-0.814578	-0.441948	-0.83004	-0.412043	0.107401
	Top panel C1
Distance	Horizontal branch (blue)							Vertical branch (green)
0	0.554764	1.02923	0.936888	1.56722	0.957653	0.911897		0.554764	1.02923	0.936888	1.56722	0.957653	0.911897
20	0.832744	1.21542	0.697498	1.14766	0.596753	0.724097		0.832744	1.21542	0.697498	1.14766	0.596753	0.724097
40	0.834627	0.634561	0.191503	0.463483	0.498994	0.343608		0.834627	0.634561	0.191503	0.463483	0.498994	0.343608
60	1.11486	0.400817	0.273179	0.280708	0.206236	0.153484		1.11486	0.400817	0.273179	0.280708	0.206236	0.153484
80	1.15946	1.18202	0.437747	0.165979	0.199892	0.188558		1.15946	1.18202	0.437747	0.165979	0.199892	0.188558
100	1.05624	1.17577	0.572543	0.120651	0.124528	0.207508		1.05624	1.17577	0.572543	0.120651	0.124528	0.207508
120	0.752855	0.6081	0.320427	0.0420543	0.0636674	0.10459		0.752855	0.6081	0.320427	0.0420543	0.0636674	0.10459
140	0.475749	0.449384	0.0994221	0.0342391	0.0400766	0.00633872		0.475749	0.449384	0.0994221	0.0342391	0.0400766	0.00633872
160	0.0858745	0.116475	0.0102045	0.0230138	0.00114435	-0.00518656		0.0858745	0.116475	0.0102045	0.0230138	0.00114435	-0.00518656
180	0.0696442	0.0911484	0.0417249	0.0020319	-0.00437343	0.0124804		0.0696442	0.0911484	0.0417249	0.0020319	-0.00437343	0.0124804
200	0.084625	0.0979336	0.0120072	0.0199441	-0.00746056	0.00837659		0.197356	0.242206	0.0019561	0.0107503	-0.00217753	0.0146234
220	0.020325	0.0481032	-0.00857689	0.0173017	0.0247765	-0.00881118		0.0736639	0.118211	0.0124657	0.0211023	0.0211969	-0.0186147
240	0.0309636	0.0704848	0.0123329	0.0315994	0.0225016	-0.0137129		0.0457253	-0.0631162	0.0477816	0.0154186	-0.00598131	-0.00246235
260								0.0248169	-0.0191016	0.00939231	0.0115992	0.000337195	-0.0121785
	Top panel C2
Distance	Horizontal branch (blue)										Vertical branch (green)
0	0.956819	0.732855	0.468736	1.82258	0.311755	2.40485	0.891356	1.09225	0.318806		0.956819	0.732855	0.468736	1.82258	0.311755	2.40485	0.891356	1.09225	0.318806
20	0.705541	0.399375	0.485016	1.55511	0.191476	0.602473	1.5308	0.465698	0.468249		0.705541	0.399375	0.485016	1.55511	0.191476	0.602473	1.5308	0.465698	0.468249
40	0.602157	0.133025	-0.0486105	1.57635	0.467275	1.06851	0.432909	0.69505	0.738932		0.602157	0.133025	-0.0486105	1.57635	0.467275	1.06851	0.432909	0.69505	0.738932
60	-0.0493844	0.146402	-0.161252	1.4042	0.571948	0.25205	0.640622	0.412874	0.0940912		-0.0493844	0.146402	-0.161252	1.4042	0.571948	0.25205	0.640622	0.412874	0.0940912
80	-0.154946	0.0590234	-0.350735	1.4128	0.125645	-0.122472	-0.0554321	0.0196448	0.0517777		-0.154946	0.0590234	-0.350735	1.4128	0.125645	-0.122472	-0.0554321	0.0196448	0.0517777
100	-0.212184	0.0442109	-0.269307	0.0608606	0.230421	0.103011	-0.282147	0.118342	0.118626		-0.212184	0.0442109	-0.269307	0.0608606	0.230421	0.103011	-0.282147	0.118342	0.118626
120	-0.220123	-0.0154487	-0.282033	-0.0720559	-0.164806	-0.189512	-0.0190601	0.027203	-0.258014		-0.220123	-0.0154487	-0.282033	-0.0720559	-0.164806	-0.189512	-0.0190601	0.027203	-0.258014
140	-0.28123	-0.00667822	-0.246951	-0.166697	-0.093495	0.0929963	-0.0241906	-0.0175697	-0.0523079		-0.28123	-0.00667822	-0.246951	-0.166697	-0.093495	0.0929963	-0.0241906	-0.0175697	-0.0523079
160	-0.167815	0.03168	-0.247323	-0.248928	-0.116854	0.0871808	-0.220754	0.0065779	-0.166439		-0.167815	0.03168	-0.247323	-0.248928	-0.116854	0.0871808	-0.220754	0.0065779	-0.166439
180	-1.11265	0.014586	-0.386018	-0.331102	-0.664497	-0.0460883	-0.211639	-0.147752	-0.0585849		-1.11265	0.014586	-0.386018	-0.331102	-0.664497	-0.0460883	-0.211639	-0.147752	-0.0585849
200	-0.658077	-0.0227289	-0.389544	0.0499376	-0.100145	-0.0745782	-0.644348	-0.392983	-0.077731		-0.773068	-0.184038	-0.637039	-0.589145	-0.188853	-0.272087	-0.70041	-0.390833	-0.167873
220	-0.583928	-0.0738616	-0.262027	-0.699063	-0.484615	-0.383696	-0.482895	-0.195646	-0.0938676		-0.39476	0.140586	-0.786195	-0.609351	-0.192378	-0.358474	-0.238696	-0.281861	-0.0617663
240	-0.732196	-0.109976	-0.421186	-0.670946	-0.552515	-0.422447	-0.727725	-0.449705	-0.155978		-1.14407	-0.0284326	-0.693159	-0.574155	-0.148669	-0.140902	-0.550136	-0.440017	-0.0708521
260											-0.294443	0.00426775	-0.66785	-0.272976	-0.199716	-0.0904282	-0.36948	-0.191203	0.0661029
	Top panel C3
Distance	Horizontal branch (blue)												Vertical branch (green)
0	-0.00750941	-0.0470055	-0.0822596	-0.264922	-0.189484	-0.0760399	0.107344	-0.0504162	-0.047636	0.0132504	-0.210149		-0.00750941	-0.0470055	-0.0822596	-0.264922	-0.189484	-0.0760399	0.107344	-0.0504162	-0.047636	0.0132504	-0.210149
20	0.041104	-0.0586135	-0.02399	0.0902333	-0.10903	-0.0307829	-0.0669541	-0.0652631	-0.151449	-0.0629128	-0.280198		0.041104	-0.0586135	-0.02399	0.0902333	-0.10903	-0.0307829	-0.0669541	-0.0652631	-0.151449	-0.0629128	-0.280198
40	-0.0137864	0.0284698	-0.091718	-0.0645465	-0.0809698	-0.0388942	0.178383	-0.14993	-0.15678	-0.11502	-0.244572		-0.0137864	0.0284698	-0.091718	-0.0645465	-0.0809698	-0.0388942	0.178383	-0.14993	-0.15678	-0.11502	-0.244572
60	-0.10089	-0.0577823	-0.0911734	-0.186933	-0.111437	-0.217028	0.27158	-0.0537123	-0.301064	-0.197652	-0.369795		-0.10089	-0.0577823	-0.0911734	-0.186933	-0.111437	-0.217028	0.27158	-0.0537123	-0.301064	-0.197652	-0.369795
80	-0.127431	0.0738072	-0.210034	-0.404247	-0.153943	-0.0329898	-0.0252798	-0.0519067	-0.13494	-0.0784475	-0.41617		-0.127431	0.0738072	-0.210034	-0.404247	-0.153943	-0.0329898	-0.0252798	-0.0519067	-0.13494	-0.0784475	-0.41617
100	-0.0786482	-0.130182	-0.194815	-0.743403	-0.295475	-0.239499	0.0599348	-0.0147609	-0.109603	-0.0437667	-0.285644		-0.0786482	-0.130182	-0.194815	-0.743403	-0.295475	-0.239499	0.0599348	-0.0147609	-0.109603	-0.0437667	-0.285644
120	0.000145316	-0.160879	-0.20092	-0.998121	-0.238897	-0.104587	-0.165465	-0.061795	-0.0250218	0.0200375	-0.25125		0.000145316	-0.160879	-0.20092	-0.998121	-0.238897	-0.104587	-0.165465	-0.061795	-0.0250218	0.0200375	-0.25125
140	-0.209805	-0.124393	-0.164662	-0.868627	-0.093753	-0.118689	-0.0213244	-0.0464322	-0.00707948	-0.0140443	-0.265122		-0.209805	-0.124393	-0.164662	-0.868627	-0.093753	-0.118689	-0.0213244	-0.0464322	-0.00707948	-0.0140443	-0.265122
160	-0.13623	-0.0573237	-0.14543	0.140893	-0.0692757	-0.0820589	0.054191	-0.0158214	-0.0451138	-0.0519353	-0.30886		-0.13623	-0.0573237	-0.14543	0.140893	-0.0692757	-0.0820589	0.054191	-0.0158214	-0.0451138	-0.0519353	-0.30886
180	-0.198856	0.0460367	-0.143252	-0.268418	0.0341764	-0.308459	0.13388	-0.10089	-0.209174	-0.16899	-0.615944		-0.198856	0.0460367	-0.143252	-0.268418	0.0341764	-0.308459	0.13388	-0.10089	-0.209174	-0.16899	-0.615944
200	-0.137233	-0.0879346	-0.416686	-0.22084	-0.121154	-0.388397	-0.406081	-0.141819	-0.39969	-0.334885	-0.591237		-0.164433	-0.305392	-0.478768	-0.16128	0.111498	-0.579887	0.0553776	-0.541881	-0.45088	-0.357127	-0.823972
220	-0.141618	-0.0323879	-0.374897	-0.332678	0.0183379	-0.314306	0.121529	-0.274523	-0.385015	-0.255005	-0.416658		-0.031958	0.0226859	-0.52755	0.190831	-0.0910014	-0.288023	-0.0484386	-0.0487252	-0.176643	-0.0289198	-0.523681
240	-0.191433	-0.0641739	-0.550537	-0.328637	-0.112125	-0.510783	-0.52434	-0.393069	-0.379053	-0.334427	-0.581205		-0.0290631	-0.0596167	-0.507057	-0.0188595	-0.104129	-0.298657	-0.305392	0.0360194	-0.25681	-0.00693617	-0.538614
260													-0.00728012	-0.0312701	-0.310924	-0.176672	-0.0666962	-0.255463	-0.0414164	0.0325542	0.00201206	0.0189799	-0.514681
	Top panel C4
Distance	Horizontal branch (blue)										Vertical branch (green)
0	0.923435	-0.00723222	-0.39376	0.979203	-0.348022	4.6693	2.58509	1.19867	-0.606687		0.923435	-0.00723222	-0.39376	0.979203	-0.348022	4.6693	2.58509	1.19867	-0.606687
20	0.0790388	-0.151213	-0.462452	0.825758	-0.348997	0.775754	1.40864	0.345211	-0.552643		0.0790388	-0.151213	-0.462452	0.825758	-0.348997	0.775754	1.40864	0.345211	-0.552643
40	0.378872	-0.209876	-0.594892	0.494743	-0.229086	0.672949	-0.0255105	0.324122	-0.0540439		0.378872	-0.209876	-0.594892	0.494743	-0.229086	0.672949	-0.0255105	0.324122	-0.0540439
60	-0.380045	-0.316141	-0.660985	0.613156	-0.403154	-0.139813	0.0393902	0.922051	-0.131366		-0.380045	-0.316141	-0.660985	0.613156	-0.403154	-0.139813	0.0393902	0.922051	-0.131366
80	-0.635432	-0.277395	-0.731979	0.495011	0.0856184	-0.196343	-0.128075	-0.263552	-0.308852		-0.635432	-0.277395	-0.731979	0.495011	0.0856184	-0.196343	-0.128075	-0.263552	-0.308852
100	-1.28666	-0.385172	-0.607181	-0.416319	-0.328501	-0.369168	-0.764736	-0.105136	-0.326057		-1.28666	-0.385172	-0.607181	-0.416319	-0.328501	-0.369168	-0.764736	-0.105136	-0.326057
120	-1.11801	-0.408182	-0.571176	-0.388054	-1.07007	-0.220074	-0.554253	0.0168502	-0.481917		-1.11801	-0.408182	-0.571176	-0.388054	-1.07007	-0.220074	-0.554253	0.0168502	-0.481917
140	-0.993427	-0.253735	-0.685705	-0.371386	-0.673995	-0.531427	-0.566938	-0.20835	-0.219269		-0.993427	-0.253735	-0.685705	-0.371386	-0.673995	-0.531427	-0.566938	-0.20835	-0.219269
160	-0.812622	-0.477891	-0.76581	-0.377417	-0.924001	-0.318698	-0.746628	-0.345353	-0.223097		-0.812622	-0.477891	-0.76581	-0.377417	-0.924001	-0.318698	-0.746628	-0.345353	-0.223097
180	-2.11373	-0.532062	-0.837525	-0.477863	-1.3772	-0.137144	-0.628779	-0.126931	-0.263524		-2.11373	-0.532062	-0.837525	-0.477863	-1.3772	-0.137144	-0.628779	-0.126931	-0.263524
200	-1.22699	-0.498133	-0.936021	-0.330591	-0.645193	-0.656832	-1.26095	-0.355975	-0.3311		-2.04918	-0.647354	-0.899253	-0.66083	-0.869067	-0.514321	-0.729041	-0.476775	-0.39174
220	-1.25568	-0.588479	-1.04952	-0.619922	-0.990362	-0.979739	-1.1554	-0.604201	-0.408691		-1.40302	-0.454952	-0.710961	-0.413253	-0.651775	-0.746628	-0.800431	-0.550666	-0.546174
240	-1.53981	-0.663189	-1.10413	-0.699915	-1.29517	-0.983991	-1.18511	-0.578577	-0.377078		-3.58475	-0.444202	-0.820814	-0.528248	-0.651111	-0.61262	-0.757801	0.0382262	-0.423932
260											-1.61199	-0.581304	-0.722304	-0.528983	-1.10269	-0.449655	-0.656479	-0.17339	-0.488796
	Top panel C5
Distance	Horizontal branch (blue)												Vertical branch (green)
0	-0.386288	-0.488203	-0.890114	-0.784201	-0.924325	-0.819204	-0.617352	-0.583479	-0.609117	-0.527853	-0.323868		-0.386288	-0.488203	-0.890114	-0.784201	-0.924325	-0.819204	-0.617352	-0.583479	-0.609117	-0.527853	-0.323868
20	-0.587674	-0.766389	-0.86288	-0.710721	-0.656959	-1.10719	-0.466422	-0.573944	-0.919834	-0.478315	-0.499602		-0.587674	-0.766389	-0.86288	-0.710721	-0.656959	-1.10719	-0.466422	-0.573944	-0.919834	-0.478315	-0.499602
40	-0.616547	-0.424653	-0.799386	-0.76444	-0.513925	-1.05905	-0.422548	-0.510691	-0.87644	-0.297284	-0.864193		-0.616547	-0.424653	-0.799386	-0.76444	-0.513925	-1.05905	-0.422548	-0.510691	-0.87644	-0.297284	-0.864193
60	-0.521765	-0.487355	-0.722049	-0.754015	-0.0373476	-0.93855	-0.430501	-0.347542	-0.920215	-0.411855	-0.642834		-0.521765	-0.487355	-0.722049	-0.754015	-0.0373476	-0.93855	-0.430501	-0.347542	-0.920215	-0.411855	-0.642834
80	-0.552742	-0.582956	-0.647608	-1.00913	-0.181187	-0.528503	-0.565808	-0.344152	-0.727798	-0.391034	-0.797027		-0.552742	-0.582956	-0.647608	-1.00913	-0.181187	-0.528503	-0.565808	-0.344152	-0.727798	-0.391034	-0.797027
100	-0.699632	-0.516595	-0.846254	-0.791928	-0.513219	-0.5564	-0.507329	-0.318006	-0.475292	-0.355678	-0.534111		-0.699632	-0.516595	-0.846254	-0.791928	-0.513219	-0.5564	-0.507329	-0.318006	-0.475292	-0.355678	-0.534111
120	-0.655222	-0.410231	-0.876073	-0.7944	-0.542727	-0.874872	-0.44238	-0.380341	-0.592505	-0.472524	-0.425769		-0.655222	-0.410231	-0.876073	-0.7944	-0.542727	-0.874872	-0.44238	-0.380341	-0.592505	-0.472524	-0.425769
140	-0.758225	-0.456421	-0.754566	-1.0599	-0.67052	-0.693572	-0.486112	-0.419313	-0.60317	-0.568817	-0.510705		-0.758225	-0.456421	-0.754566	-1.0599	-0.67052	-0.693572	-0.486112	-0.419313	-0.60317	-0.568817	-0.510705
160	-0.554366	-0.378053	-0.791871	-0.767872	-0.848415	-0.574071	-0.40499	-0.043252	-0.673133	-0.544549	-0.504066		-0.554366	-0.378053	-0.791871	-0.767872	-0.848415	-0.574071	-0.40499	-0.043252	-0.673133	-0.544549	-0.504066
180	-0.715114	-0.609936	-0.690507	-0.835957	-0.296563	-0.841706	-0.357854	-0.0520381	-0.697005	-0.593579	-0.824769		-0.715114	-0.609936	-0.690507	-0.835957	-0.296563	-0.841706	-0.357854	-0.0520381	-0.697005	-0.593579	-0.824769
200	-0.816986	-0.973524	-0.859631	-0.957181	-0.481974	-0.979725	-0.475843	-0.367614	-1.03633	-0.682851	-0.55544		-0.738887	-0.627522	-1.09343	-0.636082	-0.498882	-1.01802	-0.538956	-0.653569	-1.01286	-0.739706	-0.521454
220	-0.66542	-0.401572	-1.16579	-0.951037	-0.701327	-1.04963	-0.369394	-0.614315	-1.17887	-0.789187	-0.496297		-0.606941	-0.439385	-1.04986	-0.13631	-0.606461	-0.762349	-0.391246	-0.346723	-0.606419	-0.513968	-0.795261
240	-0.735878	-0.64443	-1.39086	-0.962732	-0.716936	-1.02255	-0.625036	-0.645631	-1.02801	-0.814853	-0.634641		-0.644218	-0.603777	-0.858105	-0.535269	-0.504165	-0.736754	-0.452042	-0.164166	-0.86086	-0.426093	-0.700282
260													-0.620812	-0.606743	-0.910313	-0.946757	-0.574085	-0.715396	-0.409454	0.16127	-0.636223	-0.435755	-0.687866
Bottom panel A1			Bottom panel A2			Bottom panel A3			Bottom panel A4			Bottom panel A5
C	H	V	C	H	V	C	H	V	C	H	V	C	H	V
0.0192575	0.442439	0.631865	-0.0825134	-1	-0.878719	-0.050816	-0.115095	-0.0124904	-0.22154	-1	-0.763679	-0.175347	-0.402561	-0.128275
0.0128299	0.490479	0.229128	0.046898	-0.0539091	0.057453	0.032805	-0.0508749	-0.00869027	-0.0148117	-0.0865747	-0.0361239	0.238715	-0.125222	0.0539624
0.0462948	0.993484	0.554628	-0.167325	-0.246804	-0.39825	-0.0297531	-0.345637	-0.319272	-0.116054	-0.378127	-0.130517	-0.139351	-0.45264	-0.245291
0.0324686	0.823209	0.41201	-0.139251	-0.733636	-0.505332	0.0298651	-0.0464561	0.0192364	-0.241761	-0.52504	-0.318979	-0.0596485	-0.129245	-0.0642397
-0.019415	0.958603	0.123853	-0.0720556	-0.876775	-0.339598	-0.0872857	-0.034437	-0.0420079	-0.190681	-0.394401	-0.198068	-0.105303	-0.272809	-0.214592
-0.0342468	0.814104	0.645151	-0.218111	-0.620986	-0.30304	-0.017793	-0.496966	-0.404937	-0.16821	-0.62682	-0.24217	-0.181733	-0.292325	-0.196651
0.176168	0.581092	0.576422	-0.0315207	-0.639457	-0.264744	-0.147116	-0.540594	-0.282301	-0.336018	-0.598477	-0.272013	-0.262171	-0.612819	-0.438109
0.0855309	0.66756	0.782048	0.0722294	-0.746215	-0.562305	-0.00209156	-0.345667	-0.0260119	-0.169634	-0.514941	-0.265914	-0.167672	-0.30872	-0.0933253
0.0404084	0.464727	0.583481	-0.122017	-0.655217	-0.529311	-0.0264538	-0.305662	-0.0520238	0.15969	-0.430343	-0.317956	-0.201394	-0.259762	-0.134669
0.00546067	1	0.598632	0.183653	-0.414187	-0.115095	-0.0549107	-0.203087	-0.00927944	-0.122002	-0.265816	-0.16674	-0.0905296	-0.0422077	-0.0455262
						-0.0281035	-0.497791	-0.23938				-0.137632	-0.170861	-0.129593
						-0.000736464	-0.332292	-0.0931774				0.0178173	-0.080794	0.00967876
						-0.0248041	-0.476139	-0.0068933				-0.185999	-0.453307	-0.197795
Bottom panel B1			Bottom panel B2			Bottom panel B3			Bottom panel B4			Bottom panel B5
C	H	V	C	H	V	C	H	V	C	H	V	C	H	V
0.00275214	0.00732905	0.927454	0.0322326	-0.932444	-0.920958	0.105225	-0.566781	-0.531341	-0.22206	-0.497703	-0.854737	-0.171266	-0.897099	-0.793227
0.0153233	0.0112024	0.887189	0.0423546	-0.0308308	-0.0749613	-0.0974799	-0.174481	-0.308044	-0.179205	-0.0495191	-0.112911	-0.481104	-0.236437	-0.559655
-0.0169964	0.00922867	0.924076	-0.117732	-0.340537	-0.871425	-0.0100503	-0.64673	-0.776968	-0.183194	-0.314824	-0.523908	-0.22418	-0.539408	-0.755825
0.0140255	0.0154561	0.896229	-0.00366494	-0.311747	-0.549099	0.039672	-0.205803	-0.17501	-0.0515135	-0.107293	-0.211545	-0.135051	-0.248327	-0.920944
-0.0186316	-0.0200979	0.918683	0.0501379	-0.15729	-0.284165	-0.00559187	-0.191408	-0.423811	-0.2494	-0.354056	-0.38892	-0.0547954	-0.49124	-1
-0.0111199	-0.0365493	1	-0.106888	-0.396985	-1	0.00727699	-0.450145	-0.578116	-0.204072	-0.594645	-0.769976	-0.319697	-0.375136	-0.64294
0.0235954	0.030599	0.77624	0.00070654	-0.287641	-0.243662	-0.0458307	-0.247138	-0.68542	-0.181578	-0.424857	-0.392606	-0.309914	-0.403335	-0.707758
0.10703	0.00600672	0.463075	0.0275891	-0.663808	-0.722862	0.0139154	-0.23909	-0.0589413	-0.323193	-0.748062	-0.668274	-0.124511	-0.0130267	-0.000946707
0.00825832	0.00562825	0.0404706	-0.176748	-0.373786	-0.30113	0.00274682	-0.111724	-0.136963	0.242136	-0.524274	-0.304789	-0.210762	-0.272753	-0.40692
0.0174363	0.000561175	0.197808	0.0873314	-0.0547096	-0.0145842	0.0494729	0.0524351	-0.00774549	-0.369089	-0.146071	-0.241499	-0.171884	-0.245904	-0.176151
						-0.0139419	-0.0505913	-0.156119				-0.0716594	-0.236399	-0.339148
						0.037099	-0.369932	-0.156686				-0.109528	-0.254689	-0.193103
						-0.0633241	-0.188461	0.0106472				-0.254828	-0.19612	-0.168602
Bottom panel C1			Bottom panel C2			Bottom panel C3			Bottom panel C4			Bottom panel C5
C	H	V	C	H	V	C	H	V	C	H	V	C	H	V
0.511075	0.0188917	0.0259837	0.492159	-0.389661	-0.425895	0.00994688	-0.273985	-0.0107598	0.184108	-0.513403	-0.954397	-0.178874	-0.257353	-0.232329
0.826793	0.0436807	-0.0302858	0.335209	-0.054427	-0.00716189	-0.0312781	-0.195798	-0.0269165	-0.0291015	-0.229875	-0.188337	-0.230409	-0.192104	-0.222316
0.60201	0.00138349	0.0210596	0.282369	-0.202281	-0.40295	-0.0314648	-0.027765	-0.24218	-0.157249	-0.395523	-0.283398	-0.321942	-0.469535	-0.324775
1	0.0180124	0.00995177	1	-0.405614	-0.250802	-0.0517116	-0.244285	-0.0578891	0.331486	-0.242395	-0.194164	-0.274547	-0.351469	-0.272181
0.57255	0.0174144	-0.00207794	0.148988	-0.307062	-0.103152	-0.0883865	-0.119257	-0.0505745	-0.128012	-0.419748	-0.322093	-0.290408	-0.260471	-0.198024
0.602603	-0.00829822	-0.00539452	0.890348	-0.238667	-0.0684962	-0.0316345	-0.197648	-0.164062	1	-0.360647	-0.195092	-0.353788	-0.380565	-0.266692
			0.717105	-0.358417	-0.272271	0.011958	-0.22621	-0.102676	0.733461	-0.429844	-0.259739	-0.199041	-0.18263	-0.158219
			0.461246	-0.191063	-0.186888	-0.0342481	-0.174516	0.0203028	0.283538	-0.217221	-0.0248211	-0.212567	-0.231395	-0.0005344
			0.233016	-0.0739779	-0.00140862	-0.0589413	-0.295436	-0.0754374	-0.212914	-0.144309	-0.167625	-0.280799	-0.405298	-0.274946
						-0.0146971	-0.963614	0.00356567				-0.184788	-0.294589	-0.158281
						-0.145173	-0.679395	-0.311848				-0.151235	-0.2077	-0.25494

## Sheet: Fig 7-supp1
	Top panel A1
Distance	Horizontal branch (blue)						Vertical branch (green)
0	0.128885	0.114315	-0.0587536	0.0631487	0.125562		0.0955804	-0.000314342	-0.393078	0.0928125	0.106168
20	-0.17231	0.0340217	0.105775	0.191235	0.223963		0.256749	0.106543	-0.130885	0.318696	0.123792
40	0.0110696	-0.13526	0.108245	0.0498679	0.510439		0.37248	0.337042	-0.151296	-0.5279	-0.698577
60	0.436166	-0.0869952	0.00721933	-0.585856	-0.192833		0.0936423	-0.053965	0.16049	-0.75654	0.130879
80	0.217424	0.260364	0.245943	0.207195	0.021381		0.169605	0.225405	0.161023	-0.06305	0.354128
100	0.357184	-0.0162548	-0.3888	-0.341443	0.0718437		-0.319066	0.0739823	0.00885486	0.111721	0.0200839
120	0.571008	0.288705	-0.684474	0.166853	0.0267479		0.288262	-0.447589	-0.0819469	0.311852	0.14066
140	0.417159	-0.065428	0.0613598	0.317374	0.159742		0.46743	0.310393	-0.449345	0.332839	0.00165953
160	-0.327231	-0.0939421	0.356889	-0.631396	0.45361		-0.662479	0.141502	0.23122	0.288389	-0.103024
180	0.237085	-0.00408641	-0.394521	-0.0172083	0.446141		0.0651396	0.27206	0.21417	-0.808021	-0.385265
200	0.00644745	0.0550395	-0.0534866	-0.0145295	0.207195		0.438479	0.040289	0.41266	-0.714567	0.215321
220	-0.0689696	0.109103	0.213256	0.334332	0.158566		0.22225	0.0884396	-0.0417305	0.627714	0.00126585
240	0.126638	-0.0216126	0.212312	-0.323599	0.434154		0.0978941	0.218616	0.0919525	0.146002	0.305081
260							0.0255467	-0.318696	-0.172028	0.232511	-0.183914
	Top panel A2
Distance	Horizontal branch (blue)						Vertical branch (green)
0	-0.0663894	-0.305029	-0.0621603	-0.112138	-0.293291		-0.0663894	-0.305029	-0.0621603	-0.112138	-0.293291
20	0.0796524	-0.287564	-0.14514	-0.0884994	-0.254829		0.0796524	-0.287564	-0.14514	-0.0884994	-0.254829
40	-0.109956	-0.320209	-0.0094524	-0.201824	-0.276494		-0.109956	-0.320209	-0.0094524	-0.201824	-0.276494
60	-0.0882471	-0.314125	-0.282726	-0.126027	-0.115447		-0.0882471	-0.314125	-0.282726	-0.126027	-0.115447
80	-0.0986789	-0.0423948	-0.0492207	0.399523	0.079596		-0.0986789	-0.0423948	-0.0492207	0.399523	0.079596
100	0.0917877	-0.04192	-0.169119	-0.434528	0.00343076		0.0917877	-0.04192	-0.169119	-0.434528	0.00343076
120	0.469504	-0.17547	-0.0396941	0.390486	-0.116189		0.469504	-0.17547	-0.0396941	0.390486	-0.116189
140	0.0464429	-0.155052	-0.0532124	0.039982	-0.244368		0.0464429	-0.155052	-0.0532124	0.039982	-0.244368
160	-0.161448	-0.209199	-0.15296	-0.349338	-0.267219		-0.161448	-0.209199	-0.15296	-0.349338	-0.267219
180	-0.0881136	-0.26627	-0.173334	0.229425	-0.00881432		-0.0881136	-0.26627	-0.173334	0.229425	-0.00881432
200	-0.112004	-0.241949	-0.204124	0.0429275	-0.29114		-0.0998957	-0.173497	-0.0681997	-0.00365038	-0.101202
220	-0.108576	-0.309807	-0.0123905	-0.0535982	-0.337838		-0.0713011	-0.287326	-0.00299746	0.131268	-0.163228
240	-0.0958447	-0.274639	0.0195918	0.0563048	-0.100742		-0.0365631	-0.234574	-0.119542	-0.0761237	-0.374045
260							0.0255467	-0.318696	-0.172028	0.232511	-0.183914
	Top panel B1
Distance	Horizontal branch (blue)						Vertical branch (green)
0	0.0955804	-0.000314342	-0.393078	0.0928125	0.106168		0.0955804	-0.000314342	-0.393078	0.0928125	0.106168
20	0.256749	0.106543	-0.130885	0.318696	0.123792		0.256749	0.106543	-0.130885	0.318696	0.123792
40	0.37248	0.337042	-0.151296	-0.5279	-0.698577		0.37248	0.337042	-0.151296	-0.5279	-0.698577
60	0.0936423	-0.053965	0.16049	-0.75654	0.130879		0.0936423	-0.053965	0.16049	-0.75654	0.130879
80	0.169605	0.225405	0.161023	-0.06305	0.354128		0.169605	0.225405	0.161023	-0.06305	0.354128
100	-0.319066	0.0739823	0.00885486	0.111721	0.0200839		-0.319066	0.0739823	0.00885486	0.111721	0.0200839
120	0.288262	-0.447589	-0.0819469	0.311852	0.14066		0.288262	-0.447589	-0.0819469	0.311852	0.14066
140	0.46743	0.310393	-0.449345	0.332839	0.00165953		0.46743	0.310393	-0.449345	0.332839	0.00165953
160	-0.662479	0.141502	0.23122	0.288389	-0.103024		-0.662479	0.141502	0.23122	0.288389	-0.103024
180	0.0651396	0.27206	0.21417	-0.808021	-0.385265		0.0651396	0.27206	0.21417	-0.808021	-0.385265
200	0.438479	0.040289	0.41266	-0.714567	0.215321		-0.0866711	-0.02671	0.276899	-0.0993295	0.478459
220	0.22225	0.0884396	-0.0417305	0.627714	0.00126585		-0.276911	0.210239	0.222849	-0.424755	0.226744
240	0.0978941	0.218616	0.0919525	0.146002	0.305081		-0.0997535	-0.155112	-0.20623	-0.452676	-0.338568
260							0.0421484	0.213389	-0.15493	0.0282241	0.222746
	Top panel B2
Distance	Horizontal branch (blue)						Vertical branch (green)
0	-0.370802	-0.171388	-0.327393	-0.416222	-0.269254		-0.370802	-0.171388	-0.327393	-0.416222	-0.269254
20	-0.0565723	0.184879	-0.397887	-0.000966378	-0.321099		-0.0565723	0.184879	-0.397887	-0.000966378	-0.321099
40	0.371272	0.0478749	-0.681923	-0.20879	0.854069		0.371272	0.0478749	-0.681923	-0.20879	0.854069
60	0.484312	-0.0533858	-0.287328	-0.61681	-0.789426		0.484312	-0.0533858	-0.287328	-0.61681	-0.789426
80	-0.385768	0.145521	-0.703993	-0.352336	-0.611796		-0.385768	0.145521	-0.703993	-0.352336	-0.611796
100	0.19368	0.0480786	-0.483267	-0.0121973	-0.332904		0.19368	0.0480786	-0.483267	-0.0121973	-0.332904
120	-0.0872091	0.260374	-0.950837	-0.458168	-0.207406		-0.0872091	0.260374	-0.950837	-0.458168	-0.207406
140	0.0564234	0.105314	-0.593983	0.425807	-0.397051		0.0564234	0.105314	-0.593983	0.425807	-0.397051
160	-0.174026	0.171041	-0.837118	-0.107738	-0.0352859		-0.174026	0.171041	-0.837118	-0.107738	-0.0352859
180	0.0439545	0.155503	0.0402588	0.0304487	-0.0837876		0.0439545	0.155503	0.0402588	0.0304487	-0.0837876
200	-0.0816981	0.0815388	0.1169	-0.485487	-0.405147		-0.170527	0.152369	-0.202521	0.252611	-0.988082
220	-0.177187	0.00501733	-0.105701	-0.454302	-0.548302		-0.0283645	0.0206491	-0.187451	-0.122861	-0.394909
240	-0.130565	0.114973	0.110159	0.564835	-0.564443		-0.324834	0.228368	-0.305898	-0.206727	0.574159
260							-0.325095	0.0841376	-0.317573	-0.139785	-0.46441
	Top panel C1
Distance	Horizontal branch (blue)						Vertical branch (green)
0	0.315854	0.247962	0.932199	1.31753	0.824889		0.315854	0.247962	0.932199	1.31753	0.824889
20	0.235718	0.188211	1.0238	1.83714	1.29173		0.235718	0.188211	1.0238	1.83714	1.29173
40	0.334169	0.428667	0.765874	1.18104	1.17967		0.334169	0.428667	0.765874	1.18104	1.17967
60	0.0407543	0.249909	0.650367	1.1598	0.81609		0.0407543	0.249909	0.650367	1.1598	0.81609
80	0.323363	0.121945	1.06315	0.698891	1.35533		0.323363	0.121945	1.06315	0.698891	1.35533
100	0.14547	0.789921	0.424425	0.301523	0.673812		0.14547	0.789921	0.424425	0.301523	0.673812
120	0.23939	0.482035	0.987602	0.903107	0.803536		0.23939	0.482035	0.987602	0.903107	0.803536
140	0.0366098	0.418607	0.990325	1.25619	0.735808		0.0366098	0.418607	0.990325	1.25619	0.735808
160	-0.0451711	0.667822	0.574384	0.606772	0.777912		-0.0451711	0.667822	0.574384	0.606772	0.777912
180	0.239298	0.57917	1.08924	1.62946	0.894709		0.239298	0.57917	1.08924	1.62946	0.894709
200	0.590291	0.496194	1.03575	1.05476	0.793561		0.19816	0.371429	1.19749	1.82694	1.08081
220	0.197549	0.456756	0.78459	1.22919	0.84885		0.149844	0.451654	0.925864	1.77692	0.58304
240	0.227896	0.435775	0.788001	1.08133	0.831452		0.32451	0.48066	0.875935	1.68701	0.874846
260							0.439387	0.269273	1.1461	1.8963	1.15
	Top panel C2
Distance	Horizontal branch (blue)						Vertical branch (green)
0	0.218803	0.0859151	0.402391	1.74958	0.0662143		0.218803	0.0859151	0.402391	1.74958	0.0662143
20	0.116555	0.338007	0.486169	3.32442	0.625912		0.116555	0.338007	0.486169	3.32442	0.625912
40	0.104767	0.178517	0.339505	1.51241	0.288964		0.104767	0.178517	0.339505	1.51241	0.288964
60	0.161425	0.487059	0.577348	0.671735	0.0691637		0.161425	0.487059	0.577348	0.671735	0.0691637
80	0.0953155	0.331269	0.428834	0.302298	0.062796		0.0953155	0.331269	0.428834	0.302298	0.062796
100	0.21222	0.229284	0.212065	1.1163	0.168601		0.21222	0.229284	0.212065	1.1163	0.168601
120	0.255049	0.217532	0.418423	0.373575	-0.00461901		0.255049	0.217532	0.418423	0.373575	-0.00461901
140	-0.124219	0.0969908	0.0482468	3.27201	0.0408055		-0.124219	0.0969908	0.0482468	3.27201	0.0408055
160	0.113513	0.132148	0.126334	3.29165	-0.165804		0.113513	0.132148	0.126334	3.29165	-0.165804
180	0.0271801	0.106667	0.23225	-0.100121	0.25447		0.0271801	0.106667	0.23225	-0.100121	0.25447
200	0.0184266	0.210737	0.273044	0.466648	-0.187572		0.0421743	0.129961	0.197431	0.22167	0.175706
220	0.104845	0.188617	0.980093	0.773762	-0.0920271		-0.00759948	-0.012049	-0.0843853	0.358065	-0.0938917
240	-0.0131366	0.154688	0.0801745	0.628525	-0.230018		0.0889549	0.0602209	0.137439	1.26165	-0.189422
260							0.145026	0.0264908	0.4557	0.995207	0.149616
Bottom panel A1			Bottom panel A2
-0.0140812	0.0187091	0.04891	0.00338586	-0.0521858	-0.00281082
0.0481205	0.0283833	0.0459701	-0.151284	-0.149201	-0.141246
0.0152536	0.138055	0.0592029	-0.0529207	0.00183878	-0.0744375
0.0825222	0.003482	-0.0559418	-0.0512236	0.000690961	0.0399235
0.113386	0.192279	0.203208	-0.139927	-0.111963	-0.142443
Bottom panel B1			Bottom panel B2
0.109895	0.0998564	-0.0179847	-0.120832	-0.087013	-0.183743
0.0331356	0.0957759	0.0181774	0.00381457	0.0339236	0.0883495
-0.163449	0.0156648	-0.112669	-0.205054	0.00126119	-0.176271
0.128356	0.241331	-0.132391	-0.117952	0.0312491	-0.0979709
0.0717271	0.095553	-0.0361205	-0.166908	-0.314588	0.0310276
Bottom panel C1			Bottom panel C2
0.1633	0.125958	0.22616	0.0615893	0.0168424	0.0429715
0.129135	0.264243	0.222025	0.0778548	0.0630488	0.0159251
0.579095	0.465582	0.598646	0.163187	0.194721	0.108932
0.933973	0.684054	1.06088	0.931854	0.257534	0.414479
0.626648	0.497471	0.599477	0.127111	-0.0591472	-0.00731039
