# Supplementary material for: Localized inhibition in the Drosophila mushroom body
Source: eLife. 2020 Sep 21;9:e56954. doi: 10.7554/eLife.56954 (PMC7541083; doi:10.7554/eLife.56954)
Supplement: Figure 8—figure supplement 2—source data 1. [file elife-56954-fig8-figsupp2-data1.xlsx]

## Sheet: B (variable neurite diam)
	Hstim											Vstim											Cstim
	space constant = 25 µm		space constant = 50 µm		space constant = 75 µm		space constant = 95 µm		space constant = 447 µm			space constant = 25 µm		space constant = 50 µm		space constant = 75 µm		space constant = 95 µm		space constant = 447 µm			space constant = 25 µm		space constant = 50 µm		space constant = 75 µm		space constant = 95 µm		space constant = 447 µm
Distance	CtoH	CtoV	CtoH	CtoV	CtoH	CtoV	CtoH	CtoV	CtoH	CtoV		CtoH	CtoV	CtoH	CtoV	CtoH	CtoV	CtoH	CtoV	CtoH	CtoV		CtoH	CtoV	CtoH	CtoV	CtoH	CtoV	CtoH	CtoV	CtoH	CtoV
0	0.020336	0.020336	0.069059	0.069059	0.1494	0.1494	0.21543	0.21543	0.70738	0.70738		1.47e-05	1.47e-05	0.0020179	0.0020179	0.01324	0.01324	0.031961	0.031961	0.49704	0.49704		1	1	1	1	1	1	1	1	1	1
10	0.016565	0.016565	0.065942	0.065942	0.14682	0.14682	0.2131	0.2131	0.70638	0.70638		1.5e-05	1.5e-05	0.0020127	0.0020127	0.013197	0.013197	0.031865	0.031865	0.49662	0.49662		0.75738	0.75738	0.81501	0.81501	0.84005	0.84005	0.85488	0.85488	0.95026	0.95026
20	0.022677	0.022677	0.079039	0.079039	0.16604	0.16604	0.23486	0.23486	0.7213	0.7213		2.06e-05	2.06e-05	0.0024035	0.0024035	0.01489	0.01489	0.035064	0.035064	0.50703	0.50703		0.97042	0.97042	0.91781	0.91781	0.90827	0.90827	0.91029	0.91029	0.96845	0.96845
30	0.021062	0.021062	0.079464	0.079464	0.16774	0.16774	0.237	0.237	0.72281	0.72281		2.28e-05	2.28e-05	0.0024859	0.0024859	0.015181	0.015181	0.035566	0.035566	0.50827	0.50827		0.83823	0.83823	0.82377	0.82377	0.83004	0.83004	0.84016	0.84016	0.94395	0.94395
40	0.022425	0.022425	0.10215	0.10215	0.20394	0.20394	0.27796	0.27796	0.74917	0.74917		4.27e-05	4.27e-05	0.0034206	0.0034206	0.018811	0.018811	0.042122	0.042122	0.5271	0.5271		0.604	0.604	0.60948	0.60948	0.64884	0.64884	0.68403	0.68403	0.90952	0.90952
50	0.020696	0.020696	0.11417	0.11417	0.22382	0.22382	0.3003	0.3003	0.76272	0.76272		6.25e-05	6.25e-05	0.0040672	0.0040672	0.021075	0.021075	0.046043	0.046043	0.5371	0.5371		0.33643	0.33643	0.36585	0.36585	0.42726	0.42726	0.48187	0.48187	0.84737	0.84737
60	0.022957	0.022957	0.13368	0.13368	0.25054	0.25054	0.32861	0.32861	0.77782	0.77782		8.38e-05	8.38e-05	0.0047931	0.0047931	0.023575	0.023575	0.050324	0.050324	0.54758	0.54758		0.094941	0.094941	0.19371	0.19371	0.31935	0.31935	0.41071	0.41071	0.86008	0.86008
70	0.031091	0.031091	0.15735	0.15735	0.27998	0.27998	0.35886	0.35886	0.79271	0.79271		0.00012357	0.00012357	0.0057605	0.0057605	0.026594	0.026594	0.055288	0.055288	0.55841	0.55841		0.11828	0.11828	0.19007	0.19007	0.29003	0.29003	0.3698	0.3698	0.83116	0.83116
80	0.049285	0.049285	0.20066	0.20066	0.32908	0.32908	0.40731	0.40731	0.814	0.814		0.00020123	0.00020123	0.0073453	0.0073453	0.031242	0.031242	0.062728	0.062728	0.57338	0.57338		0.1012	0.1012	0.20665	0.20665	0.32497	0.32497	0.41182	0.41182	0.85653	0.85653
90	0.068449	0.068449	0.24165	0.24165	0.37332	0.37332	0.44994	0.44994	0.8313	0.8313		0.00030512	0.00030512	0.008965	0.008965	0.035617	0.035617	0.069492	0.069492	0.58569	0.58569		0.093353	0.093353	0.21038	0.21038	0.33443	0.33443	0.42354	0.42354	0.86418	0.86418
100	0.10047	0.10047	0.29573	0.29573	0.42804	0.42804	0.50159	0.50159	0.85171	0.85171		0.00048792	0.00048792	0.01118	0.01118	0.041129	0.041129	0.07779	0.07779	0.60033	0.60033		0.087445	0.087445	0.2099	0.2099	0.33679	0.33679	0.42696	0.42696	0.86562	0.86562
110	0.13685	0.13685	0.35586	0.35586	0.4866	0.4866	0.55562	0.55562	0.87114	0.87114		0.00091242	0.00091242	0.01492	0.01492	0.049056	0.049056	0.088774	0.088774	0.61543	0.61543		0.069675	0.069675	0.19654	0.19654	0.33325	0.33325	0.42927	0.42927	0.8745	0.8745
120	0.18331	0.18331	0.41806	0.41806	0.54249	0.54249	0.60541	0.60541	0.88731	0.88731		0.0014096	0.0014096	0.018327	0.018327	0.055821	0.055821	0.097967	0.097967	0.62754	0.62754		0.064361	0.064361	0.20546	0.20546	0.34851	0.34851	0.44585	0.44585	0.88066	0.88066
130	0.23102	0.23102	0.48769	0.48769	0.60523	0.60523	0.66112	0.66112	0.90496	0.90496		0.0019811	0.0019811	0.021097	0.021097	0.061521	0.061521	0.10607	0.10607	0.63965	0.63965		0.026453	0.026453	0.12758	0.12758	0.26247	0.26247	0.363	0.363	0.85447	0.85447
140	0.3436	0.3436	0.60455	0.60455	0.70017	0.70017	0.74191	0.74191	0.92772	0.92772		0.0029762	0.0029762	0.025799	0.025799	0.070609	0.070609	0.11843	0.11843	0.65551	0.65551		0.023099	0.023099	0.12835	0.12835	0.27075	0.27075	0.37541	0.37541	0.86506	0.86506
150	0.45766	0.45766	0.69086	0.69086	0.76307	0.76307	0.79318	0.79318	0.94074	0.94074		0.0044406	0.0044406	0.032932	0.032932	0.083139	0.083139	0.13431	0.13431	0.67134	0.67134		0.025495	0.025495	0.14337	0.14337	0.29111	0.29111	0.39563	0.39563	0.86788	0.86788
160	0.53952	0.53952	0.7505	0.7505	0.80628	0.80628	0.82827	0.82827	0.94942	0.94942		0.0065439	0.0065439	0.039574	0.039574	0.094457	0.094457	0.14877	0.14877	0.68634	0.68634		0.019149	0.019149	0.1201	0.1201	0.25298	0.25298	0.34994	0.34994	0.83419	0.83419
170	0.54701	0.54701	0.74899	0.74899	0.80735	0.80735	0.83038	0.83038	0.95101	0.95101		0.010513	0.010513	0.05153	0.05153	0.11221	0.11221	0.17037	0.17037	0.70714	0.70714		0.010871	0.010871	0.07119	0.07119	0.16233	0.16233	0.23757	0.23757	0.74961	0.74961
180	0.53069	0.53069	0.71646	0.71646	0.78103	0.78103	0.80926	0.80926	0.94752	0.94752		0.0091678	0.0091678	0.057807	0.057807	0.1307	0.1307	0.19673	0.19673	0.73493	0.73493		0.0077067	0.0077067	0.055723	0.055723	0.13256	0.13256	0.1993	0.1993	0.71622	0.71622
190	0.4181	0.54365	0.65313	0.6557	0.75584	0.71255	0.79813	0.74528	0.95204	0.9271		0.0050536	0.023587	0.037786	0.12523	0.10152	0.23721	0.16498	0.32012	0.72056	0.81277		0.0011037	0.0022129	0.014896	0.016956	0.059821	0.053101	0.11266	0.095432	0.66615	0.62191
200	0.51051	1	0.75976	1	0.83908	0.96315	0.8661	0.94763	0.96738	0.97437		0.0061519	0.068367	0.044812	0.20012	0.11516	0.30516	0.18239	0.37776	0.73524	0.81898		0.0012841	0.0039144	0.019594	0.039454	0.071754	0.11039	0.12921	0.1767	0.68157	0.71038
210	0.48907	0.96222	0.74557	0.93775	0.82858	0.9128	0.85751	0.90612	0.96537	0.96443		0.0036265	0.059136	0.041066	0.12912	0.11573	0.19196	0.18672	0.24604	0.74518	0.73143		0.0005042	0.0029486	0.013068	0.03498	0.057095	0.10826	0.1093	0.17945	0.66183	0.73107
220	0.57616	0.73261	0.85028	0.78217	0.91074	0.79781	0.92507	0.81145	0.98141	0.93997		0.0032032	0.095912	0.04613	0.16008	0.13066	0.2092	0.20805	0.25374	0.76688	0.71597		0.00061943	0.0025884	0.015005	0.036392	0.06167	0.11227	0.1155	0.18492	0.66764	0.73534
230	0.64425	0.5215	0.95758	0.62721	1	0.67328	1	0.70427	1	0.9082		0.0043077	0.17316	0.058088	0.26387	0.15289	0.31416	0.23515	0.35371	0.7857	0.7493		0.00082901	0.00097549	0.018881	0.018704	0.071894	0.069418	0.13017	0.12511	0.68412	0.67166
240	0.60706	0.37596	0.91275	0.52631	0.96186	0.60005	0.96723	0.64433	0.99097	0.8925		0.0027574	0.13303	0.047758	0.17146	0.13521	0.20419	0.21399	0.23877	0.77087	0.68577		0.00066702	0.00050116	0.016931	0.012962	0.066924	0.056295	0.12302	0.10798	0.67549	0.66059
250	0.51805	0.25796	0.81252	0.38917	0.88181	0.46832	0.90102	0.52081	0.97537	0.84445		0.0023413	0.4313	0.045921	0.51621	0.1321	0.56569	0.21006	0.59805	0.76703	0.84829		0.00040683	0.00023239	0.012205	0.0073037	0.053766	0.034645	0.10378	0.070498	0.65354	0.58481
260		0.23418		0.34192		0.41022		0.46095		0.81555			0.82463		0.93042		0.96088		0.97272		1			0.00011203		0.0028727		0.016724		0.039088		0.51961
270		0.14206		0.24883		0.32633		0.38292		0.78179			1		1		1		1		0.99924			6.66e-05		0.0024078		0.014443		0.034243		0.5

## Sheet: C (fixed neurite diam)
	Hstim											Vstim											Cstim
	space constant = 25 µm		space constant = 50 µm		space constant = 75 µm		space constant = 95 µm		space constant = 447 µm			space constant = 25 µm		space constant = 50 µm		space constant = 75 µm		space constant = 95 µm		space constant = 447 µm			space constant = 25 µm		space constant = 50 µm		space constant = 75 µm		space constant = 95 µm		space constant = 447 µm
Distance	CtoH	CtoV	CtoH	CtoV	CtoH	CtoV	CtoH	CtoV	CtoH	CtoV		CtoH	CtoV	CtoH	CtoV	CtoH	CtoV	CtoH	CtoV	CtoH	CtoV		CtoH	CtoV	CtoH	CtoV	CtoH	CtoV	CtoH	CtoV	CtoH	CtoV
0	0.009968	0.009968	0.027326	0.027326	0.06553	0.06553	0.1075	0.1075	0.59894	0.59894		6.72e-07	6.72e-07	0.00035224	0.00035224	0.0037281	0.0037281	0.011249	0.011249	0.3937	0.3937		0.84825	0.84825	0.95932	0.95932	1	1	1	1	1	1
10	0.0091907	0.0091907	0.028327	0.028327	0.069666	0.069666	0.11373	0.11373	0.60741	0.60741		9.09e-07	9.09e-07	0.00040552	0.00040552	0.0040891	0.0040891	0.012091	0.012091	0.3996	0.3996		0.70889	0.70889	0.82543	0.82543	0.86854	0.86854	0.8741	0.8741	0.94614	0.94614
20	0.014196	0.014196	0.037452	0.037452	0.084988	0.084988	0.1334	0.1334	0.62949	0.62949		1.41e-06	1.41e-06	0.00053572	0.00053572	0.0049741	0.0049741	0.014151	0.014151	0.41404	0.41404		1	1	1	1	0.98861	0.98861	0.96934	0.96934	0.97476	0.97476
30	0.013151	0.013151	0.03738	0.03738	0.086116	0.086116	0.13512	0.13512	0.63128	0.63128		1.68e-06	1.68e-06	0.0005665	0.0005665	0.0051284	0.0051284	0.014464	0.014464	0.41543	0.41543		0.86866	0.86866	0.89076	0.89076	0.8953	0.8953	0.88585	0.88585	0.94299	0.94299
40	0.014218	0.014218	0.051987	0.051987	0.11508	0.11508	0.17219	0.17219	0.66782	0.66782		4.17e-06	4.17e-06	0.00091758	0.00091758	0.0071226	0.0071226	0.018774	0.018774	0.43982	0.43982		0.73245	0.73245	0.6983	0.6983	0.71099	0.71099	0.7207	0.7207	0.90433	0.90433
50	0.011483	0.011483	0.059256	0.059256	0.13121	0.13121	0.19266	0.19266	0.68592	0.68592		7.56e-06	7.56e-06	0.0011916	0.0011916	0.0084466	0.0084466	0.021448	0.021448	0.45231	0.45231		0.41841	0.41841	0.41472	0.41472	0.44729	0.44729	0.47811	0.47811	0.82357	0.82357
60	0.011175	0.011175	0.072221	0.072221	0.15268	0.15268	0.21778	0.21778	0.70472	0.70472		1.1e-05	1.1e-05	0.0014855	0.0014855	0.009835	0.009835	0.024213	0.024213	0.46451	0.46451		0.12587	0.12587	0.18928	0.18928	0.29291	0.29291	0.37106	0.37106	0.84194	0.84194
70	0.015485	0.015485	0.088065	0.088065	0.17529	0.17529	0.24311	0.24311	0.72161	0.72161		1.82e-05	1.82e-05	0.0018824	0.0018824	0.011476	0.011476	0.027302	0.027302	0.47608	0.47608		0.13279	0.13279	0.18429	0.18429	0.26036	0.26036	0.32273	0.32273	0.79909	0.79909
80	0.02493	0.02493	0.11536	0.11536	0.21003	0.21003	0.28026	0.28026	0.74372	0.74372		3.1e-05	3.1e-05	0.0024643	0.0024643	0.013735	0.013735	0.031447	0.031447	0.49062	0.49062		0.12028	0.12028	0.19776	0.19776	0.29164	0.29164	0.36208	0.36208	0.8283	0.8283
90	0.035518	0.035518	0.14453	0.14453	0.24544	0.24544	0.31711	0.31711	0.76353	0.76353		5.27e-05	5.27e-05	0.0031644	0.0031644	0.016185	0.016185	0.035746	0.035746	0.50384	0.50384		0.10146	0.10146	0.19389	0.19389	0.29594	0.29594	0.3701	0.3701	0.83703	0.83703
100	0.054058	0.054058	0.18568	0.18568	0.29155	0.29155	0.36378	0.36378	0.78745	0.78745		9.87e-05	9.87e-05	0.004234	0.004234	0.019507	0.019507	0.041339	0.041339	0.51998	0.51998		0.08415	0.08415	0.17999	0.17999	0.28532	0.28532	0.36205	0.36205	0.83642	0.83642
110	0.078015	0.078015	0.23827	0.23827	0.34724	0.34724	0.41835	0.41835	0.81208	0.81208		0.00022775	0.00022775	0.0063202	0.0063202	0.024964	0.024964	0.049705	0.049705	0.53783	0.53783		0.061277	0.061277	0.15458	0.15458	0.26938	0.26938	0.35415	0.35415	0.84708	0.84708
120	0.11333	0.11333	0.30046	0.30046	0.4071	0.4071	0.47459	0.47459	0.83451	0.83451		0.00040989	0.00040989	0.0084831	0.0084831	0.03014	0.03014	0.057428	0.057428	0.55349	0.55349		0.049334	0.049334	0.15618	0.15618	0.28242	0.28242	0.37191	0.37191	0.8579	0.8579
130	0.15472	0.15472	0.37728	0.37728	0.47954	0.47954	0.54162	0.54162	0.8596	0.8596		0.00068865	0.00068865	0.010553	0.010553	0.03494	0.03494	0.064755	0.064755	0.56975	0.56975		0.019031	0.019031	0.083722	0.083722	0.19163	0.19163	0.28029	0.28029	0.82483	0.82483
140	0.25498	0.25498	0.50043	0.50043	0.58161	0.58161	0.63117	0.63117	0.8885	0.8885		0.0011983	0.0011983	0.013825	0.013825	0.041963	0.041963	0.074954	0.074954	0.58866	0.58866		0.015731	0.015731	0.080624	0.080624	0.19459	0.19459	0.28808	0.28808	0.83718	0.83718
150	0.38159	0.38159	0.61039	0.61039	0.66267	0.66267	0.69907	0.69907	0.90805	0.90805		0.0019742	0.0019742	0.018707	0.018707	0.051923	0.051923	0.088699	0.088699	0.60876	0.60876		0.015999	0.015999	0.089755	0.089755	0.21242	0.21242	0.30868	0.30868	0.84318	0.84318
160	0.48673	0.48673	0.6963	0.6963	0.72591	0.72591	0.75208	0.75208	0.92306	0.92306		0.0034225	0.0034225	0.023482	0.023482	0.060953	0.060953	0.10123	0.10123	0.62814	0.62814		0.012129	0.012129	0.074106	0.074106	0.18259	0.18259	0.27031	0.27031	0.806	0.806
170	0.50801	0.50801	0.70908	0.70908	0.74223	0.74223	0.76903	0.76903	0.93031	0.93031		0.0049053	0.0049053	0.031432	0.031432	0.07451	0.07451	0.1191	0.1191	0.65353	0.65353		0.0073457	0.0073457	0.043369	0.043369	0.11298	0.11298	0.17582	0.17582	0.70988	0.70988
180	0.49952	0.49952	0.67364	0.67364	0.71236	0.71236	0.74426	0.74426	0.92552	0.92552		0.0038096	0.0038096	0.032701	0.032701	0.08369	0.08369	0.13488	0.13488	0.67931	0.67931		0.0051884	0.0051884	0.033615	0.033615	0.09097	0.09097	0.14507	0.14507	0.67326	0.67326
190	0.40503	0.54627	0.62812	0.64154	0.70862	0.66558	0.75398	0.69737	0.93804	0.90808		0.0019849	0.0093559	0.019985	0.072865	0.062484	0.16075	0.11083	0.23299	0.67017	0.76456		0.00093572	0.0017304	0.0067723	0.0095345	0.032236	0.032072	0.068194	0.06139	0.61367	0.57121
200	0.49305	1	0.74974	1	0.80612	0.9181	0.83567	0.90183	0.95813	0.95743		0.0026188	0.03555	0.024232	0.136	0.072514	0.22877	0.12509	0.29601	0.68747	0.77493		0.00089016	0.002628	0.0091676	0.021335	0.040587	0.070226	0.081521	0.12197	0.63304	0.66611
210	0.4776	0.9961	0.75094	0.9453	0.81063	0.86449	0.84049	0.85416	0.96004	0.94395		0.001149	0.03965	0.020275	0.099595	0.070773	0.1512	0.12655	0.19522	0.69875	0.68154		0.00038617	0.0020984	0.0054801	0.017969	0.030762	0.065853	0.067085	0.1198	0.61462	0.68451
220	0.56026	0.73825	0.87007	0.76434	0.90424	0.73275	0.91824	0.74382	0.97893	0.91278		0.00089408	0.074331	0.022366	0.13799	0.079951	0.17898	0.14158	0.21367	0.7207	0.66515		0.00040407	0.0015374	0.0064484	0.018194	0.033908	0.06802	0.072036	0.12344	0.6221	0.68879
230	0.61224	0.5054	0.98273	0.59946	1	0.60593	1	0.63343	1	0.87671		0.0011706	0.13662	0.028673	0.23226	0.095188	0.28081	0.1624	0.31457	0.74079	0.70514		0.00046432	0.00058126	0.0083263	0.0083849	0.040544	0.038452	0.082883	0.077487	0.64025	0.6177
240	0.59661	0.37016	0.95788	0.50515	0.97756	0.54071	0.98014	0.57998	0.99416	0.86204		0.00074402	0.12403	0.023623	0.16245	0.084658	0.18688	0.1487	0.21134	0.72867	0.63607		0.00038463	0.00031873	0.0073744	0.0053098	0.037621	0.029315	0.078328	0.064005	0.63324	0.60533
250	0.53629	0.2463	0.88265	0.35721	0.91815	0.40461	0.93076	0.45079	0.98244	0.80529		0.00059352	0.41603	0.022801	0.49304	0.083616	0.54028	0.14763	0.57025	0.72794	0.8234		0.00027012	0.00014566	0.0054253	0.0030294	0.030634	0.017929	0.066856	0.041026	0.61459	0.5266
260		0.22093		0.30556		0.34253		0.38521		0.76832			0.80593		0.91667		0.95046		0.96382		0.99924			8.34e-05		0.0011642		0.0078185		0.020446		0.45547
270		0.13218		0.21551		0.26397		0.31084		0.73053			1		1		1		1		1			4.52e-05		0.00095458		0.0067544		0.017839		0.43538

## Sheet: D (backbone)
	Hstim											Vstim											Cstim
	space constant = 25 µm		space constant = 50 µm		space constant = 75 µm		space constant = 95 µm		space constant = 447 µm			space constant = 25 µm		space constant = 50 µm		space constant = 75 µm		space constant = 95 µm		space constant = 447 µm			space constant = 25 µm		space constant = 50 µm		space constant = 75 µm		space constant = 95 µm		space constant = 447 µm
Distance	CtoH	CtoV	CtoH	CtoV	CtoH	CtoV	CtoH	CtoV	CtoH	CtoV		CtoH	CtoV	CtoH	CtoV	CtoH	CtoV	CtoH	CtoV	CtoH	CtoV		CtoH	CtoV	CtoH	CtoV	CtoH	CtoV	CtoH	CtoV	CtoH	CtoV
0	0.005452	0.005452	0.0380265	0.0380265	0.104163	0.104163	0.16507	0.16507	0.67548	0.67548		3.86822e-05	3.86822e-05	0.00606395	0.00606395	0.0331571	0.0331571	0.068341	0.068341	0.56458	0.56458		0.574589	0.574589	0.701731	0.701731	0.774201	0.774201	0.81182	0.81182	0.95222	0.95222
10	0.00760793	0.00760793	0.0462649	0.0462649	0.118916	0.118916	0.18327	0.18327	0.69074	0.69074		5.7707e-05	5.7707e-05	0.00740653	0.00740653	0.0378863	0.0378863	0.075907	0.075907	0.57735	0.57735		0.72318	0.72318	0.809103	0.809103	0.856465	0.856465	0.88075	0.88075	0.97002	0.97002
20	0.0103045	0.0103045	0.0561216	0.0561216	0.135648	0.135648	0.20339	0.20339	0.70633	0.70633		8.60887e-05	8.60887e-05	0.00904635	0.00904635	0.0432901	0.0432901	0.08431	0.08431	0.5904	0.5904		0.840441	0.840441	0.895731	0.895731	0.922751	0.922751	0.93618	0.93618	0.98417	0.98417
30	0.0137581	0.0137581	0.0679162	0.0679162	0.154614	0.154614	0.22562	0.22562	0.72225	0.72225		0.000128429	0.000128429	0.0110492	0.0110492	0.0494646	0.0494646	0.093644	0.093644	0.60375	0.60375		0.929213	0.929213	0.9593	0.9593	0.970841	0.970841	0.97619	0.97619	0.99422	0.99422
40	0.0182367	0.0182367	0.0820217	0.0820217	0.176094	0.176094	0.25016	0.25016	0.7385	0.7385		0.000191594	0.000191594	0.0134956	0.0134956	0.0565198	0.0565198	0.10401	0.10401	0.61741	0.61741		0.98596	0.98596	0.99594	0.99594	0.997823	0.997823	0.99841	0.99841	0.99968	0.99968
50	0.0240811	0.0240811	0.0988714	0.0988714	0.200393	0.200393	0.27724	0.27724	0.75508	0.75508		0.000285825	0.000285825	0.0164835	0.0164835	0.0645812	0.0645812	0.11553	0.11553	0.63137	0.63137		1	1	1	1	1	1	1	1	1	1
60	0.0317294	0.0317294	0.118966	0.118966	0.227843	0.227843	0.30706	0.30706	0.77199	0.77199		0.0004264	0.0004264	0.020133	0.020133	0.0737925	0.0737925	0.12832	0.12832	0.64564	0.64564		0.951564	0.951564	0.963747	0.963747	0.972777	0.972777	0.97752	0.97752	0.99456	0.99456
70	0.0417484	0.0417484	0.142882	0.142882	0.2588	0.2588	0.33986	0.33986	0.78921	0.78921		0.000636114	0.000636114	0.0245905	0.0245905	0.0843176	0.0843176	0.14252	0.14252	0.66024	0.66024		0.808352	0.808352	0.876973	0.876973	0.910532	0.910532	0.92689	0.92689	0.98269	0.98269
80	0.0548724	0.0548724	0.17127	0.17127	0.293637	0.293637	0.37588	0.37588	0.80673	0.80673		0.000948971	0.000948971	0.030035	0.030035	0.0963439	0.0963439	0.1583	0.1583	0.67517	0.67517		0.645219	0.645219	0.771318	0.771318	0.832767	0.832767	0.8629	0.8629	0.9671	0.9671
90	0.0720515	0.0720515	0.204866	0.204866	0.332741	0.332741	0.41534	0.41534	0.82453	0.82453		0.0014157	0.0014157	0.0366848	0.0366848	0.110086	0.110086	0.17583	0.17583	0.69044	0.69044		0.49517	0.49517	0.663836	0.663836	0.750594	0.750594	0.79412	0.79412	0.94944	0.94944
100	0.0945133	0.0945133	0.244482	0.244482	0.3765	0.3765	0.45845	0.45845	0.84258	0.84258		0.00211197	0.00211197	0.0448069	0.0448069	0.125787	0.125787	0.19529	0.19529	0.70606	0.70606		0.36992	0.36992	0.563123	0.563123	0.670122	0.670122	0.72543	0.72543	0.93072	0.93072
110	0.123838	0.123838	0.290999	0.290999	0.425284	0.425284	0.50537	0.50537	0.86084	0.86084		0.0031507	0.0031507	0.0547273	0.0547273	0.143728	0.143728	0.21691	0.21691	0.72202	0.72202		0.27101	0.27101	0.472962	0.472962	0.594512	0.594512	0.65949	0.65949	0.91152	0.91152
120	0.16205	0.16205	0.345343	0.345343	0.479418	0.479418	0.55624	0.55624	0.87924	0.87924		0.00470028	0.00470028	0.066844	0.066844	0.164228	0.164228	0.24092	0.24092	0.73835	0.73835		0.195649	0.195649	0.394479	0.394479	0.525201	0.525201	0.59764	0.59764	0.89221	0.89221
130	0.211729	0.211729	0.408452	0.408452	0.539151	0.539151	0.61107	0.61107	0.89772	0.89772		0.007012	0.007012	0.0816435	0.0816435	0.187652	0.187652	0.2676	0.2676	0.75505	0.75505		0.139649	0.139649	0.3274	0.3274	0.462643	0.462643	0.54046	0.54046	0.873	0.873
140	0.276143	0.276143	0.48121	0.48121	0.604595	0.604595	0.66979	0.66979	0.91614	0.91614		0.0104607	0.0104607	0.0997196	0.0997196	0.214417	0.214417	0.29722	0.29722	0.77212	0.77212		0.0987965	0.0987965	0.270777	0.270777	0.406746	0.406746	0.48806	0.48806	0.85402	0.85402
150	0.359389	0.359389	0.564355	0.564355	0.675656	0.675656	0.73209	0.73209	0.93436	0.93436		0.0156055	0.0156055	0.121798	0.121798	0.245	0.245	0.33013	0.33013	0.78958	0.78958		0.0694201	0.0694201	0.223393	0.223393	0.357137	0.357137	0.44034	0.44034	0.83535	0.83535
160	0.466551	0.466551	0.658328	0.658328	0.751931	0.751931	0.79745	0.79745	0.95218	0.95218		0.0232807	0.0232807	0.148764	0.148764	0.279944	0.279944	0.36667	0.36667	0.80743	0.80743		0.0485455	0.0485455	0.183989	0.183989	0.313307	0.313307	0.39705	0.39705	0.81701	0.81701
170	0.603852	0.603852	0.763062	0.763062	0.832564	0.832564	0.86495	0.86495	0.96933	0.96933		0.0347307	0.0347307	0.181701	0.181701	0.319873	0.319873	0.40727	0.40727	0.82569	0.82569		0.0338724	0.0338724	0.15137	0.15137	0.274705	0.274705	0.35788	0.35788	0.79903	0.79903
180	0.778758	0.778758	0.877671	0.877671	0.916057	0.916057	0.93318	0.93318	0.98543	0.98543		0.0518121	0.0518121	0.22193	0.22193	0.365497	0.365497	0.45236	0.45236	0.84437	0.84437		0.0236793	0.0236793	0.124465	0.124465	0.24078	0.24078	0.3225	0.3225	0.78143	0.78143
190	1	1	1	1	1	1	1	1	1	1		0.0770633	0.0770633	0.270962	0.270962	0.417562	0.417562	0.50238	0.50238	0.86345	0.86345		0.016712	0.016712	0.102334	0.102334	0.211014	0.211014	0.29059	0.29059	0.7642	0.7642
200	0.892784	0.948946	0.939346	0.96891	0.957328	0.977538	0.96553	0.98164	0.992	0.99559		0.0516571	0.114257	0.221845	0.330622	0.365439	0.476902	0.45231	0.55783	0.84435	0.88294		0.0114559	0.0114569	0.0839134	0.0839149	0.18476	0.184761	0.26169	0.26169	0.74731	0.74731
210	0.809364	0.891574	0.874769	0.92159	0.907702	0.940702	0.92401	0.95069	0.98143	0.98762		0.0346268	0.168655	0.181631	0.402958	0.319822	0.544354	0.40723	0.61915	0.82568	0.90281		0.0078318	0.00783387	0.0687797	0.0687827	0.161748	0.161751	0.23565	0.23565	0.73079	0.7308
220	0.687889	0.763016	0.787051	0.837021	0.840651	0.877811	0.86792	0.89865	0.96706	0.97468		0.023211	0.247237	0.148707	0.49005	0.2799	0.620591	0.36664	0.68659	0.80743	0.92299		0.00534085	0.00534437	0.0563574	0.056362	0.141588	0.141592	0.21218	0.21219	0.71464	0.71464
230	0.554637	0.617974	0.68849	0.737804	0.764103	0.802733	0.80336	0.83602	0.95005	0.95868		0.0155588	0.358346	0.121751	0.593423	0.244961	0.705708	0.33009	0.75993	0.78957	0.9433		0.00363301	0.00363854	0.0461672	0.0461737	0.12393	0.123936	0.19105	0.19105	0.69884	0.69884
240	0.427449	0.482026	0.588704	0.636848	0.684521	0.723872	0.7354	0.76928	0.9314	0.94084		0.0104294	0.509479	0.0996815	0.712513	0.214383	0.798204	0.29719	0.83764	0.77211	0.96327		0.00246399	0.00247243	0.0378119	0.0378205	0.108469	0.108477	0.17201	0.17202	0.68339	0.68339
250	0.312531	0.365029	0.492918	0.54108	0.60581	0.646154	0.66721	0.70237	0.91176	0.92198		0.00699102	0.699985	0.0816123	0.840834	0.187622	0.89251	0.26757	0.91501	0.75504	0.98179		0.00166403	0.00167676	0.0309631	0.0309742	0.0949328	0.0949422	0.15487	0.15488	0.66828	0.66828
260		0.268746		0.45379		0.572306		0.63759		0.90261			0.900599		0.956591		0.97305		0.97953		0.99617			0.0011345		0.0253645		0.083094		0.13944		0.6535
270		0.191036		0.376108		0.503688		0.57618		0.88305			1		1		1		1		1			0.000765023		0.0207686		0.0727229		0.12554		0.63905

## Sheet: E (KC-KC inh, fixed neur diam)
left (all KCs)						mid (same subtype)						right (calyx only)
25	50	75	Inf	Scramble		25	50	75	Inf	Scramble		25	50	75	Inf	Scramble
4.1409	2.4713	2.0041	1.2914	1.2975		1.8154	1.2813	1.1438	0.95254	0.95844		1.3759	1.0578	0.98955	0.92366	0.59044
3.9046	2.3026	1.8495	1.2107	1.3899		1.7084	1.2212	1.0854	0.89292	1.0278		1.803	1.1597	1.0117	0.92366	1.1262
4.4573	2.4997	2.0057	1.2914	1.4034		1.9825	1.3092	1.1534	0.95254	1.0396		1.9773	1.3661	1.2834	1.2182	1.4105
4.3417	2.4251	1.9051	1.2511	1.2997		1.874	1.2886	1.1247	0.92273	0.96094		1.6345	1.1646	1.0671	0.92366	0.8431
4.8655	2.5788	2.064	1.5338	1.3213		2.2423	1.4232	1.2459	1.1315	0.97849		3.6393	1.839	1.4807	1.3024	1.1875
3.6475	2.2306	1.8455	1.3116	1.251		1.6827	1.2256	1.1132	0.96745	0.92717		1.9202	1.3447	1.2046	1.0498	1.0577
5.9497	2.9324	2.2043	1.3722	1.3921		2.632	1.5911	1.3105	1.0122	1.0281		3.0373	1.6932	1.3803	1.134	0.82907
4.0245	2.3117	1.8622	1.2712	1.087		1.8479	1.2626	1.1165	0.93764	0.80267		1.6425	1.1797	1.0617	0.88161	1.191
5.055	2.5824	1.9844	1.2511	1.0875		2.2434	1.4169	1.2034	0.92273	0.80731		2.5889	1.4201	1.1783	0.96571	0.44907
4.0815	2.3142	1.9144	1.4126	1.3642		1.809	1.2377	1.1291	1.042	1.0123		2.2567	1.5032	1.4032	1.3445	0.95414
4.294	2.3631	1.9045	1.3318	1.3515		1.9244	1.2791	1.1325	0.98236	1.0002		2.4603	1.5177	1.3572	1.2182	1.0056
4.3348	2.5203	2.0381	1.2914	1.213		1.9193	1.3136	1.1656	0.95254	0.89389		1.5727	1.1151	1.0185	0.92366	0.90319
6.1703	2.92	2.101	1.2511	1.1456		2.6782	1.5807	1.2676	0.92273	0.84589		5.1912	1.798	1.2242	0.92366	0.42745
4.3119	2.5013	1.9815	1.2309	0.89532		1.8357	1.2918	1.1347	0.90783	0.66433		1.6057	1.1128	0.99233	0.83957	0.92226
5.9317	2.9403	2.2243	1.3722	1.2496		2.6712	1.5912	1.3271	1.0122	0.92435		4.2672	2.204	1.692	1.1761	1.0779
5.1381	2.7391	2.1341	1.2914	1.607		2.2274	1.4395	1.2328	0.95254	1.1919		2.4454	1.4082	1.1643	0.96571	1.4976
4.8208	2.6892	2.1535	1.4732	1.4776		2.2428	1.5085	1.3149	1.0867	1.0905		3.4398	2.1239	1.8133	1.4287	0.91045
5.3006	2.9337	2.264	1.3924	1.4198		2.3483	1.5525	1.3223	1.0271	1.0488		1.8031	1.1088	0.95602	0.83957	1.1685
5.7116	2.9929	2.2539	1.3722	1.7206		2.464	1.5781	1.3164	1.0122	1.2732		3.0245	1.5001	1.1725	0.96571	0.57147
5.4532	2.7781	2.13	1.3318	1.1638		2.5286	1.5331	1.2852	0.98236	0.85938		3.7021	2.0869	1.6335	1.0919	0.78587
4.5483	2.6366	2.1142	1.3924	1.5534		2.0299	1.407	1.2418	1.0271	1.151		3.0047	1.829	1.5493	1.2603	0.85444
4.9596	2.8786	2.308	1.5136	1.4322		2.2754	1.5672	1.3753	1.1166	1.0575		3.0536	1.841	1.5513	1.2603	1.1501
4.594	2.6479	2.1538	1.5944	1.508		2.1925	1.4945	1.3218	1.1762	1.1162		2.9168	1.7672	1.4476	1.2182	1.3986
5.1028	2.767	2.1566	1.4126	1.3243		2.299	1.5033	1.2904	1.042	0.97905		2.9634	1.5862	1.2721	1.0919	0.93851
5.1311	2.8358	2.2639	1.4934	1.4875		2.3253	1.5356	1.3434	1.1017	1.1		2.5322	1.5808	1.3314	1.0919	0.92578
4.0514	2.5796	2.1305	1.3318	1.2014		1.8291	1.3898	1.2592	0.98236	0.88838		1.4817	1.1393	1.0507	0.92366	0.95971
4.7615	2.7816	2.2396	1.4126	1.6364		2.1965	1.5016	1.3181	1.042	1.2127		2.4281	1.4466	1.2411	1.0498	1.0596
4.6744	2.7684	2.2329	1.4732	1.4318		2.0226	1.4429	1.2837	1.0867	1.0626		2.1591	1.3841	1.175	0.92366	1.1884
5.2319	2.9088	2.2694	1.3924	1.4231		2.4065	1.5872	1.3518	1.0271	1.057		2.5745	1.2997	1.0097	0.79753	0.61892
5.0023	2.7597	2.1755	1.453	1.3206		2.2303	1.482	1.2885	1.0718	0.9769		3.213	1.8854	1.5137	1.134	1.2094
4.5382	2.5349	2.0189	1.3722	1.3807		2.0135	1.3781	1.2166	1.0122	1.0191		2.5208	1.6375	1.3609	1.0078	0.66434
4.9063	2.7023	2.1	1.352	1.4054		2.1427	1.4467	1.248	0.99727	1.0379		2.6574	1.7119	1.4244	1.0919	0.86133
4.708	2.69	2.1123	1.2511	1.3048		2.1188	1.4399	1.2441	0.92273	0.96501		1.5771	1.1818	1.0882	0.92366	0.30891
4.4625	2.7171	2.1961	1.3116	1.2925		1.9542	1.4056	1.2495	0.96745	0.95614		1.4531	1.172	1.1007	0.92366	0.69801
5.2901	2.8553	2.2353	1.5338	1.6115		2.4288	1.5696	1.3471	1.1315	1.1867		3.3239	1.7974	1.406	1.0919	1.1984
4.7442	2.6753	2.1396	1.453	1.4961		2.1093	1.4456	1.2798	1.0718	1.1029		1.9007	1.3705	1.2357	1.0498	1.4595
4.8727	2.7906	2.2014	1.3924	1.3645		2.1922	1.4974	1.3031	1.0271	1.0098		2.552	1.3303	1.0966	0.92366	1.0082
4.699	2.6287	2.1206	1.4732	1.253		2.085	1.4316	1.2755	1.0867	0.92396		1.9709	1.2081	1.068	0.96571	0.88229
4.7853	2.8157	2.2508	1.3924	1.4415		2.1192	1.5133	1.333	1.0271	1.0663		2.2719	1.3415	1.1075	0.88161	1.1267
4.8159	2.7409	2.224	1.4934	1.3846		2.1556	1.471	1.3071	1.1017	1.0227		1.9352	1.3258	1.1991	1.0498	0.56977
4.3861	2.4164	1.9443	1.3924	1.373		1.9966	1.3271	1.1745	1.0271	1.0156		2.2322	1.2174	1.0947	1.134	0.99768
4.4127	2.6253	2.1376	1.3116	1.1785		2.029	1.4057	1.2491	0.96745	0.87072		1.8771	1.1909	1.0482	0.83957	0.92554
5.3604	2.9252	2.262	1.3722	1.5497		2.3602	1.5463	1.3174	1.0122	1.1466		1.9628	1.3635	1.1751	0.92366	1.0238
5.209	2.8283	2.2049	1.4328	1.3649		2.3684	1.54	1.3162	1.0569	1.0078		2.3916	1.6564	1.4372	1.134	0.89635
4.7268	2.5701	2.0282	1.2511	1.0871		2.1764	1.3658	1.1722	0.92273	0.80551		2.9126	1.5983	1.2955	0.96571	1.0187
4.7791	2.4033	1.8355	1.1905	1.1092		2.1216	1.3088	1.107	0.87802	0.81985		2.7925	1.3729	1.124	0.92366	0.72212
5.6789	3.08	2.4115	1.4934	1.499		2.6001	1.7042	1.4621	1.1017	1.1077		2.7098	1.6191	1.3328	1.0498	1.5525
5.8111	2.971	2.2075	1.2511	1.1179		2.4857	1.5504	1.2829	0.92273	0.83077		2.2586	1.2745	1.0448	0.88161	0.91746
4.8558	2.9276	2.3835	1.6146	1.8928		2.2322	1.5944	1.4177	1.1912	1.3983		2.695	1.996	1.8174	1.5551	1.3229
4.654	2.7	2.1525	1.352	1.1919		2.1523	1.4871	1.2979	0.99727	0.88169		2.036	1.3943	1.227	1.0078	0.8516
6.9403	3.2643	2.3296	1.2712	1.231		3.0204	1.7725	1.4076	0.93764	0.91132		6.2262	3.064	1.9412	0.83957	0.77487
5.234	2.9394	2.2724	1.352	1.2477		2.3577	1.5606	1.3229	0.99727	0.92318		2.4068	1.7792	1.5691	1.2182	0.96185
5.5092	2.9896	2.2817	1.3318	1.1285		2.3947	1.5716	1.327	0.98236	0.83185		2.8027	1.7391	1.426	1.0498	0.51453
5.3176	2.8519	2.2519	1.5136	1.3909		2.3609	1.516	1.3221	1.1166	1.031		2.4773	1.6439	1.4658	1.2182	0.81372
4.3224	2.6477	2.1645	1.3924	1.4236		1.9878	1.4419	1.2863	1.0271	1.0482		2.3398	1.6797	1.504	1.1761	1.0273
5.1629	2.967	2.384	1.4732	1.6571		2.2921	1.5703	1.3895	1.0867	1.2221		2.6126	1.8284	1.6268	1.3024	1.0442
6.3844	3.2721	2.5169	1.5944	1.9048		2.8366	1.7257	1.4617	1.1762	1.4082		2.9096	1.7539	1.4787	1.134	1.8521
5.2412	2.7741	2.1598	1.4934	1.3171		2.2486	1.468	1.2755	1.1017	0.97293		2.9496	1.8089	1.4912	1.1761	0.70264
5.0069	2.8654	2.3123	1.554	1.4907		2.2852	1.5825	1.4037	1.1464	1.1032		2.7141	1.5577	1.2995	1.0919	1.4781
4.708	2.7354	2.2427	1.453	1.2969		2.104	1.4483	1.3037	1.0718	0.95595		1.9377	1.3062	1.1772	0.96571	1.1201
4.1028	2.4336	2.0109	1.453	1.2508		1.9608	1.3894	1.2456	1.0718	0.92291		2.6824	1.567	1.2954	1.0919	0.76766
4.3992	2.6575	2.14	1.4328	1.2766		1.9095	1.392	1.2403	1.0569	0.94567		2.1336	1.642	1.5038	1.3445	1.4488
5.2401	2.7721	2.1586	1.453	1.4585		2.3993	1.5327	1.3122	1.0718	1.0783		2.8249	1.7683	1.4684	1.134	0.95245
3.2108	2.038	1.6859	1.1501	1.0806		1.4295	1.0783	0.98316	0.84821	0.80039		1.1186	0.94811	0.88323	0.7555	0.65578
3.7048	2.1352	1.7296	1.2309	1.3664		1.6311	1.145	1.0264	0.90783	1.0098		1.7081	1.1232	0.98578	0.92366	0.98527
4.6682	2.5798	2.0491	1.3318	1.3786		2.1377	1.4004	1.2167	0.98236	1.0191		2.0168	1.3444	1.1951	1.0078	0.92701
5.1278	2.8174	2.2044	1.4126	1.4772		2.2499	1.4946	1.2903	1.042	1.0959		3.0415	1.7748	1.5065	1.2182	1.7773
5.3176	2.9245	2.2839	1.4732	1.375		2.4513	1.5988	1.3676	1.0867	1.0157		2.845	1.5001	1.2196	0.96571	1.0922
5.386	3.0479	2.3988	1.6146	1.7098		2.4253	1.6337	1.414	1.1912	1.2623		3.5773	2.155	1.784	1.4287	1.6008
5.0958	2.7313	2.1265	1.4126	1.5188		2.2967	1.4686	1.2606	1.042	1.1238		2.3575	1.6565	1.4666	1.1761	1.9494
3.9451	2.5603	2.1516	1.5136	1.5353		1.7815	1.3417	1.2358	1.1166	1.1335		1.6803	1.4259	1.3676	1.2603	0.71339
4.4006	2.6165	2.1304	1.453	1.4395		2.0034	1.3981	1.2521	1.0718	1.063		1.7406	1.3843	1.2868	1.0919	1.0564
4.9538	2.8453	2.2891	1.5338	1.4408		2.2492	1.5079	1.3318	1.1315	1.0676		2.0907	1.6034	1.4816	1.2182	0.97
4.2123	2.4411	2.0171	1.4328	1.3982		1.948	1.3349	1.2065	1.0569	1.0334		1.2987	0.96199	0.91513	0.92366	1.0319
4.0215	2.4159	1.9964	1.352	1.1727		1.9002	1.3264	1.1919	0.99727	0.86764		1.7082	1.1999	1.0719	0.88161	0.88948
5.3196	2.9769	2.3115	1.5136	1.66		2.3185	1.5617	1.341	1.1166	1.2293		2.8207	1.7217	1.4878	1.3866	1.5424
4.7399	2.7245	2.1684	1.4934	1.3459		2.1403	1.4603	1.277	1.1017	0.9941		1.9812	1.436	1.3024	1.2182	0.84928
4.0331	2.3005	1.8282	1.1501	1.1117		1.8587	1.2618	1.0955	0.84821	0.82424		1.6672	1.1184	0.95521	0.71348	0.99884
4.2954	2.4601	1.9759	1.3924	1.3678		1.9217	1.3217	1.1684	1.0271	1.0131		2.4495	1.6675	1.4509	1.1761	1.0589
5.4499	2.8137	2.1469	1.3722	1.4206		2.3625	1.4793	1.2558	1.0122	1.0488		2.1956	1.4469	1.2557	0.96571	1.7609
3.8636	2.2896	1.8987	1.3116	1.2221		1.7784	1.2325	1.1155	0.96745	0.90421		2.0353	1.3104	1.1835	1.0498	1.0441
3.5915	2.1331	1.7821	1.2712	1.261		1.6476	1.1654	1.0658	0.93764	0.93422		1.4111	0.99102	0.95125	0.92366	1.1981
3.2449	2.0332	1.7247	1.2511	1.2172		1.4889	1.1136	1.0341	0.92273	0.90105		1.4638	1.1222	1.0518	0.92366	0.75447
4.5327	2.364	1.9044	1.4328	1.4399		2.1778	1.3427	1.177	1.0569	1.0626		1.9787	1.2407	1.1427	1.1761	1.0844
4.1754	2.3612	1.9409	1.3722	1.2814		1.9719	1.3401	1.2002	1.0122	0.94688		2.3389	0.97019	0.80471	0.7555	0.79493
3.952	2.2909	1.8448	1.2712	1.1988		1.864	1.2588	1.1032	0.93764	0.88754		1.7447	1.398	1.2933	1.0498	0.74936
3.9647	2.3546	1.922	1.3318	1.5423		1.914	1.3034	1.1562	0.98236	1.1379		1.817	1.3967	1.2751	0.96571	1.1486
4.3274	2.4342	1.9588	1.3318	1.0919		1.9661	1.313	1.1601	0.98236	0.80584		2.0803	1.4697	1.3459	1.134	0.7375
4.853	2.5659	2.017	1.3318	1.3314		2.2449	1.4008	1.2022	0.98236	0.98782		1.8611	1.2905	1.1588	0.96571	0.85511
3.7757	2.2306	1.8345	1.2511	1.2721		1.7562	1.2491	1.1233	0.92273	0.94143		2.2904	1.488	1.2863	0.96571	0.85954
3.773	2.3772	1.9392	1.2914	1.3208		1.7931	1.2807	1.1353	0.95254	0.97846		1.9349	1.4381	1.2862	0.92366	0.94374
4.8038	2.6261	2.0388	1.3318	1.312		2.2409	1.4479	1.233	0.98236	0.9715		2.0124	1.4601	1.291	1.0078	1.5938
4.1378	2.5112	2.0121	1.2712	1.4612		1.9438	1.3201	1.1505	0.93764	1.0809		1.9175	1.417	1.2558	0.88161	1.3555
4.853	2.6793	2.1293	1.4934	1.637		2.2487	1.4449	1.2593	1.1017	1.2138		2.0496	1.457	1.2949	1.0078	1.1171
4.6586	2.4075	1.8601	1.2511	1.15		2.0755	1.3084	1.1228	0.92273	0.85116		1.9847	1.3994	1.2241	0.92366	0.99858
4.4614	2.5967	2.0385	1.2107	1.2927		2.04	1.3531	1.1626	0.89292	0.95814		2.1498	1.4253	1.1968	0.79753	0.91001
4.7769	2.6697	2.093	1.3924	1.2769		2.1818	1.4067	1.2118	1.0271	0.94498		2.1652	1.5762	1.3948	1.0498	1.2755
4.6729	2.6262	2.0481	1.3318	1.4047		2.2195	1.4262	1.2125	0.98236	1.0391		2.3193	1.6519	1.4508	1.0919	0.72461
4.3406	2.4419	1.9534	1.2511	1.3815		2.0913	1.3591	1.1766	0.92273	1.0212		1.8392	1.2729	1.1305	0.83957	0.6768
5.3202	2.7865	2.1295	1.2712	1.1822		2.4142	1.5155	1.2717	0.93764	0.87339		1.9649	1.4413	1.2822	0.96571	0.95719
5.6518	2.898	2.1742	1.3116	1.3214		2.598	1.5143	1.2477	0.96745	0.97721		2.4746	1.6472	1.3972	0.92366	1.0138
4.5783	2.5056	1.9637	1.3116	1.525		2.0637	1.3307	1.1513	0.96745	1.1273		1.7473	1.3017	1.1876	0.96571	1.463
3.4669	2.1515	1.757	1.1097	0.77187		1.6147	1.1434	1.0179	0.81841	0.56984		1.5989	1.0857	0.92865	0.62945	0.65593
3.63	2.1742	1.7794	1.2309	1.1568		1.6614	1.1752	1.056	0.90783	0.85554		1.6174	1.0849	0.96955	0.83957	0.66949
4.6439	2.4929	1.9482	1.2712	1.4023		2.1561	1.3377	1.143	0.93764	1.0365		2.1204	1.4564	1.2825	0.96571	0.80804
4.0711	2.2444	1.8312	1.2914	1.1421		1.8825	1.2207	1.0899	0.95254	0.84538		1.2878	0.8191	0.72147	0.62945	0.66087
4.8045	2.5272	1.9581	1.3722	1.2071		2.1517	1.3937	1.1945	1.0122	0.89364		2.8886	1.5828	1.2934	1.0498	1.3499
5.3661	2.6224	1.9631	1.2712	1.252		2.4148	1.404	1.1641	0.93764	0.92844		1.8119	1.3347	1.1811	0.88161	1.2741
4.3448	2.4415	1.8991	1.1703	1.3178		2.043	1.3161	1.1219	0.86311	0.97487		1.8531	1.4122	1.2619	0.88161	0.65863
4.2618	2.4426	1.934	1.2309	1.3187		2.0256	1.3382	1.1533	0.90783	0.9744		2.3871	1.7428	1.5506	1.134	0.63334
4.4939	2.5292	1.9482	1.2107	1.2762		2.0683	1.3195	1.1164	0.89292	0.94665		2.0804	1.4423	1.2457	0.88161	1.18
4.5002	2.3548	1.8797	1.352	1.3746		2.0789	1.3015	1.1392	0.99727	1.0157		2.058	1.3971	1.241	1.0078	0.8676
3.5276	2.2329	1.8144	1.1703	1.1929		1.6094	1.1748	1.0504	0.86311	0.8826		1.5336	1.1845	1.0682	0.7555	0.51963
4.4719	2.4269	1.9085	1.2107	1.31		2.0727	1.3341	1.1456	0.89292	0.96752		1.9954	1.4452	1.2732	0.92366	0.88705
4.2685	2.5341	2.038	1.3116	1.0505		1.9649	1.3257	1.1596	0.96745	0.77392		1.6493	1.2906	1.1843	0.92366	0.84817
5.7641	3.0168	2.2543	1.453	1.5032		2.7462	1.6424	1.3402	1.0718	1.1089		2.5227	1.8328	1.6025	1.1761	1.1351
3.5734	2.1426	1.7748	1.2914	1.3002		1.7628	1.2248	1.1012	0.95254	0.9674		1.6395	1.1442	0.99378	0.7555	0.77029
4.9688	2.395	1.8606	1.3722	1.1934		2.4205	1.401	1.1869	1.0122	0.88252		3.4827	2.0097	1.6123	1.134	1.1579
4.553	2.4427	1.9202	1.2712	1.1524		2.1513	1.3403	1.1516	0.93764	0.85066		1.6764	1.1538	1.0267	0.83957	0.71045
4.3423	2.4241	1.8789	1.1703	1.1708		2.0357	1.3012	1.1019	0.86311	0.86578		2.4424	1.7335	1.4999	1.0078	1.1611
5.0116	2.6884	1.9956	1.2107	1.0761		2.3553	1.4699	1.1917	0.89292	0.79687		2.8092	1.9861	1.7241	1.1761	0.52291
4.3494	2.5186	2.0184	1.2914	1.2216		2.0488	1.3569	1.1857	0.95254	0.89803		1.2621	0.99695	0.91602	0.79753	1.1272
6.4872	2.6623	1.9656	1.3924	1.2996		3.0592	1.4911	1.2036	1.0271	0.96234		1.7824	1.0007	0.87477	0.88161	1.3502
4.3276	2.4449	1.9742	1.453	1.4163		2.0066	1.3634	1.2165	1.0718	1.0492		1.7352	1.3023	1.1682	1.0078	1.1434
4.8837	2.6268	2.0849	1.4732	1.6504		2.3174	1.4514	1.2558	1.0867	1.2184		1.9753	1.3777	1.2458	1.134	1.4368
4.0558	2.3293	1.8727	1.2914	1.2475		1.8258	1.255	1.1182	0.95254	0.92457		1.8987	1.2675	1.1042	0.92366	0.99062
4.6735	2.6186	2.0619	1.3116	1.0004		2.1763	1.4154	1.2189	0.96745	0.74079		1.5458	1.1901	1.0838	0.83957	0.95195
4.924	2.4532	1.8922	1.4328	1.5673		2.2543	1.3652	1.1646	1.0569	1.1526		3.2997	1.9374	1.546	1.1761	1.1565
5.3363	2.7283	2.097	1.453	1.4692		2.5054	1.5193	1.2777	1.0718	1.0874		2.2205	1.4546	1.2331	1.0078	1.0168
5.1077	2.7732	2.2221	1.6146	1.7338		2.3946	1.5577	1.3702	1.1912	1.2817		2.273	1.4288	1.2489	1.1761	1.5596
4.0166	2.4767	2.021	1.3116	1.2451		1.8156	1.3118	1.1782	0.96745	0.91969		1.6389	1.2754	1.1554	0.83957	0.87004
4.9099	2.6005	2.0368	1.4328	1.3758		2.328	1.4695	1.2686	1.0569	1.017		2.1942	1.4701	1.2692	0.96571	1.0346
3.7348	2.272	1.9253	1.3924	1.082		1.7307	1.2193	1.1214	1.0271	0.80043		1.2064	0.91476	0.86894	0.83957	0.63264
4.3153	2.2331	1.7389	1.3116	1.5535		2.0347	1.2407	1.0617	0.96745	1.1468		2.5278	1.449	1.208	1.0919	0.65021
3.922	2.2058	1.7694	1.2914	1.4732		1.8451	1.2375	1.0877	0.95254	1.0937		1.8822	1.2135	1.0124	0.83957	0.99189
4.2227	2.2787	1.7945	1.1703	1.1451		1.8628	1.2148	1.0574	0.86311	0.84785		1.7165	1.0519	0.86897	0.67146	0.7631
4.2427	2.4191	1.9452	1.3318	1.4643		1.9662	1.329	1.1736	0.98236	1.0837		1.581	1.1008	0.98327	0.83957	1.1041
5.2862	2.8356	2.1662	1.4126	1.464		2.4571	1.575	1.3249	1.042	1.0848		2.3988	1.3943	1.1327	0.96571	0.94923
4.7947	2.6124	2.05	1.3722	1.5732		2.2243	1.4497	1.2459	1.0122	1.1658		1.8482	1.2015	1.0206	0.83957	1.0292
5.416	2.8231	2.1815	1.5338	1.5456		2.4741	1.5357	1.3068	1.1315	1.14		2.3634	1.4363	1.2321	1.134	0.61665
4.6953	2.5133	1.9593	1.3722	1.5864		2.1923	1.4207	1.2171	1.0122	1.1778		2.3771	1.389	1.1581	0.96571	1.3181
4.5561	2.4032	1.8951	1.3924	1.5531		2.1152	1.3635	1.1884	1.0271	1.1505		2.9242	1.602	1.2563	1.0078	0.93799
5.1144	2.5672	2.0308	1.554	1.5456		2.415	1.4331	1.2296	1.1464	1.1441		2.4023	1.4796	1.2914	1.1761	1.5864
4.9843	2.5826	2.0225	1.4934	1.5906		2.3521	1.4423	1.2396	1.1017	1.1742		2.282	1.4909	1.3058	1.134	1.2938
4.4375	2.4508	1.9636	1.4126	1.3188		2.0868	1.3466	1.1767	1.042	0.9746		1.9295	1.1949	1.0108	0.88161	1.0816
4.7624	2.5618	1.9906	1.3924	1.3132		2.2574	1.467	1.2533	1.0271	0.97154		2.5712	1.447	1.1354	0.83957	1.0203
5.8952	2.7789	2.0866	1.4328	1.3554		2.7847	1.5466	1.2657	1.0569	1.0024		2.2984	1.3551	1.1533	1.0078	0.69373
4.667	2.4957	2.0126	1.453	1.2092		2.1803	1.3948	1.2286	1.0718	0.89592		1.643	1.1871	1.081	0.96571	1.3261
4.5307	2.4127	1.9141	1.3722	1.5081		2.1304	1.3876	1.2107	1.0122	1.1164		1.7287	1.1771	1.0344	0.88161	1.022
5.3943	2.6027	2.0171	1.453	1.6201		2.5847	1.5301	1.2878	1.0718	1.1975		2.1033	1.272	1.0717	0.88161	0.99737
5.2888	2.7284	2.1226	1.4934	1.2945		2.4719	1.5132	1.2903	1.1017	0.95687		2.0138	1.2036	1.0205	0.92366	1.0655
5.1601	2.6659	2.1198	1.5742	1.2399		2.5475	1.5868	1.3738	1.1613	0.91897		2.6168	1.3424	1.0496	0.92366	0.94075
4.6846	2.4301	1.9345	1.4126	1.4037		2.2083	1.3516	1.1742	1.042	1.0402		2.0152	1.243	1.0737	0.92366	0.89821
4.6988	2.4286	1.9114	1.4732	1.3249		2.3034	1.4143	1.21	1.0867	0.97694		2.1571	1.3737	1.1866	1.134	0.94471
4.3585	2.3551	1.8574	1.352	1.6254		2.0123	1.308	1.1405	0.99727	1.2023		1.6024	1.14	1.0149	0.88161	1.6177
4.7205	2.5607	2.0009	1.3924	1.2689		2.2718	1.4605	1.2466	1.0271	0.93826		2.6646	1.4834	1.1746	0.96571	0.73148
3.6462	2.0815	1.6826	1.1905	1.3506		1.7164	1.1466	1.0196	0.87802	0.99875		1.3847	0.97092	0.85849	0.67146	1.4053
4.6494	2.5021	1.9618	1.453	1.3661		2.1855	1.3797	1.1872	1.0718	1.009		1.753	1.2514	1.1092	0.92366	0.99011
4.5415	2.6006	2.0834	1.4934	1.4499		2.1052	1.4333	1.2629	1.1017	1.0693		2.3683	1.5499	1.3247	1.134	0.9474
4.6159	2.635	2.1016	1.453	1.5397		2.1463	1.4549	1.2721	1.0718	1.1365		1.8965	1.3481	1.1853	1.0078	1.1055
4.5452	2.5405	2.0593	1.5136	1.4362		2.3274	1.549	1.3519	1.1166	1.0615		2.4092	1.4842	1.2517	1.0919	0.98339
4.4988	2.533	2.0505	1.4934	1.4193		2.1122	1.4154	1.258	1.1017	1.0506		2.206	1.5154	1.3222	1.0498	0.85347
5.2438	2.7908	2.1578	1.5136	1.6308		2.3967	1.5705	1.3457	1.1166	1.2047		2.8621	1.7949	1.461	1.0919	1.0723
4.3667	2.7349	2.1982	1.4126	1.3694		2.0088	1.4576	1.286	1.042	1.0135		1.7331	1.2852	1.1379	0.83957	1.229
4.2932	2.6446	2.155	1.4126	1.4369		2.0483	1.468	1.3008	1.042	1.0597		1.6264	1.1976	1.0738	0.88161	1.3628
5.7705	2.8384	2.1302	1.4328	1.4519		2.6372	1.5876	1.3173	1.0569	1.0756		2.622	1.4965	1.1937	0.96571	0.92414
7.378	3.4392	2.4097	1.453	1.278		3.2193	1.813	1.4162	1.0718	0.95099		2.4559	1.3928	1.1623	1.134	0.80732
5.6088	2.7971	2.1109	1.453	1.3534		2.6383	1.5901	1.323	1.0718	1.0008		3.0614	1.7679	1.402	1.0078	1.1366
3.572	1.9373	1.6029	1.2107	0.93601		1.7236	1.1056	0.99509	0.89292	0.69074		1.0561	0.7069	0.64319	0.62945	0.60619
3.8718	2.0673	1.6218	1.1501	1.2009		1.7939	1.1347	0.9783	0.84821	0.88561		1.579	1.0538	0.90827	0.7555	0.96231
4.7207	2.3226	1.7581	1.2309	1.2713		2.0974	1.2673	1.0653	0.90783	0.94207		1.6845	1.0195	0.84032	0.71348	1.1382
4.1235	2.0719	1.6163	1.2107	0.99899		2.0171	1.1967	1.0143	0.89292	0.73835		2.0379	1.2562	1.0919	0.96571	0.8148
4.5708	2.1844	1.6218	1.1097	0.95917		2.1834	1.2771	1.0423	0.81841	0.71337		3.8426	1.928	1.3761	0.92366	0.48731
4.433	2.1662	1.6825	1.1905	1.1516		2.2261	1.3068	1.1005	0.87802	0.85358		2.036	1.1116	0.9044	0.7555	1.2794
4.2705	2.2074	1.7106	1.2107	1.2872		1.8582	1.1675	1.0076	0.89292	0.94855		1.7552	1.0647	0.91252	0.83957	1.1303
5.9792	2.7668	2.0059	1.2914	1.336		2.8894	1.5913	1.2682	0.95254	0.98862		4.1325	2.327	1.6906	0.83957	0.99386
4.6655	2.3509	1.752	1.1703	1.1951		2.0846	1.2522	1.0358	0.86311	0.88512		1.2635	0.83414	0.75489	0.7555	0.70991
4.1527	1.9582	1.5048	1.1097	1.1803		2.0342	1.1268	0.93809	0.81841	0.87469		2.2151	1.2005	1.0056	0.88161	0.66616
5.5025	2.4246	1.7602	1.1299	1.2439		2.5708	1.352	1.0744	0.83331	0.92018		2.488	1.189	0.89318	0.62945	1.0715
4.4904	2.0699	1.5538	1.1703	1.1745		2.0966	1.1611	0.95629	0.86311	0.86955		2.1045	1.2281	1.0371	0.92366	0.85328
4.7297	2.3363	1.8053	1.3116	1.337		2.3115	1.3449	1.1296	0.96745	0.98832		2.3799	1.1694	0.92568	0.88161	1.423
4.4437	2.2964	1.7639	1.1299	1.0407		2.2057	1.3561	1.1347	0.83331	0.76948		2.9961	1.5276	1.1134	0.62945	0.97525
4.3209	2.2703	1.8044	1.4328	1.3818		2.13	1.3317	1.153	1.0569	1.0189		2.5533	1.6409	1.3979	1.1761	0.54272
5.7748	2.6598	2.0009	1.352	1.3734		2.7796	1.5608	1.2824	0.99727	1.0162		1.3149	0.8528	0.73882	0.67146	0.92759
5.4577	2.657	2.0176	1.4732	1.5878		2.7484	1.6278	1.3371	1.0867	1.175		3.6444	2.3041	1.8493	1.134	1.111
5.9607	2.6466	1.9244	1.3116	1.2736		2.8766	1.532	1.2131	0.96745	0.94393		2.0624	1.2655	1.0601	0.88161	0.87095
5.2843	2.5343	1.9224	1.3722	1.2393		2.417	1.3567	1.1283	1.0122	0.91221		1.629	1.0624	0.96342	1.0078	1.1342
5.3794	2.537	1.9137	1.352	1.2101		2.7572	1.5276	1.237	0.99727	0.8967		2.9939	1.5571	1.2291	0.96571	0.76569
5.6625	2.4906	1.8689	1.3722	1.2706		2.6968	1.4407	1.1823	1.0122	0.93506		2.748	1.5443	1.2359	0.96571	0.90309
4.4818	2.3164	1.8176	1.3924	1.3916		2.0562	1.3104	1.1373	1.0271	1.0324		2.3137	1.4317	1.1868	1.0078	0.83009
4.5871	2.3414	1.7575	1.1703	1.2296		2.1071	1.2863	1.0635	0.86311	0.90731		2.5672	1.4266	1.1195	0.83957	0.59894
5.412	2.5652	1.9284	1.3318	1.5247		2.5145	1.4029	1.1563	0.98236	1.1295		2.7232	1.5117	1.2467	1.0498	1.0899
4.4606	2.3683	1.8104	1.2107	1.2046		2.0455	1.3348	1.136	0.89292	0.8922		2.2319	1.3534	1.0935	0.7555	0.67101
6.0363	2.836	2.0584	1.3116	1.1003		2.9069	1.6127	1.28	0.96745	0.81259		1.9989	1.2124	1.0189	0.83957	0.84345
3.9731	2.1308	1.6808	1.2914	1.245		1.961	1.2343	1.0526	0.95254	0.92123		2.1362	1.3912	1.1964	1.0498	0.53271
4.9173	2.5649	1.9663	1.3116	1.263		2.4557	1.5177	1.263	0.96745	0.93166		2.6585	1.6308	1.3013	0.88161	0.95608
4.3719	2.2612	1.7299	1.2309	1.2623		2.1807	1.3128	1.0906	0.90783	0.93071		2.0455	1.3255	1.1387	0.96571	1.3101
4.6647	2.165	1.6534	1.2511	1.366		2.2518	1.2568	1.0411	0.92273	1.0123		2.5698	1.3585	1.0874	0.88161	1.2835
4.7057	2.4418	1.851	1.3116	1.2678		2.2346	1.3638	1.1316	0.96745	0.94034		2.4333	1.6098	1.3769	1.0919	0.64936
3.9275	2.2229	1.7578	1.2309	1.2135		1.8733	1.2379	1.0746	0.90783	0.89964		1.9204	1.2644	1.0856	0.88161	1.2751
4.7348	2.3367	1.7905	1.3116	1.2628		2.4086	1.3854	1.1419	0.96745	0.93346		3.1175	1.7726	1.3751	0.96571	0.92067
4.3799	2.2814	1.8078	1.3116	0.9939		2.2156	1.356	1.159	0.96745	0.73575		2.348	1.4017	1.1503	0.92366	0.57243
6.5606	2.9812	2.1277	1.2914	1.1702		3.1672	1.6748	1.3014	0.95254	0.86391		2.5009	1.4905	1.1848	0.79753	0.73554
3.978	2.2293	1.8218	1.3722	1.1987		1.9622	1.2964	1.1536	1.0122	0.88563		1.3049	1.042	0.98771	0.92366	1.3702
3.9559	2.2185	1.7822	1.2309	1.3974		1.8449	1.2354	1.0901	0.90783	1.0319		1.5078	0.99316	0.85866	0.67146	1.3089
4.1675	2.2868	1.815	1.352	1.4535		1.9318	1.2732	1.111	0.99727	1.0795		2.083	1.4455	1.2722	1.0919	0.84002
3.8276	2.2247	1.8041	1.2712	1.1942		1.8237	1.2463	1.1066	0.93764	0.88638		1.7069	1.155	0.98618	0.7555	1.2941
4.363	2.4218	1.9331	1.4126	1.372		2.1507	1.3746	1.1866	1.042	1.0129		1.7621	1.2928	1.152	1.0078	0.65634
4.3271	2.2195	1.7018	1.2511	1.3102		2.1777	1.318	1.0922	0.92273	0.97091		1.9533	1.2806	1.0867	0.96571	1.5143
4.1505	2.1268	1.6472	1.2107	1.2655		1.9944	1.2507	1.0585	0.89292	0.93643		2.3263	1.36	1.1442	1.0498	1.238
3.8726	2.1295	1.6793	1.2309	1.35		1.8846	1.2455	1.0739	0.90783	0.99532		1.5038	1.1151	1.009	0.92366	1.1637
3.3934	1.9789	1.6237	1.2309	1.3782		1.616	1.0885	0.97295	0.90783	1.0211		1.2865	0.89485	0.81491	0.7555	1.2363
5.4664	2.3608	1.7658	1.2309	0.95643		2.6823	1.4025	1.1333	0.90783	0.70949		2.5788	1.2254	0.91576	0.71348	1.0273
5.1374	2.3357	1.7284	1.1703	1.0518		2.4516	1.3499	1.0875	0.86311	0.77801		3.2243	1.5163	1.1375	0.88161	0.7317
6.4387	2.5735	1.8265	1.2309	1.0982		3.1103	1.5076	1.1642	0.90783	0.81246		4.2592	1.8132	1.3152	0.92366	0.75616
6.245	2.6092	1.8395	1.1905	1.1356		3.0247	1.5946	1.2251	0.87802	0.84074		3.5052	1.7918	1.3237	0.88161	1.376
4.5992	2.1658	1.5886	1.0492	1.1521		2.1834	1.2458	1.0005	0.77371	0.84811		2.2163	1.274	1.0337	0.83957	0.86032
3.9714	2.1139	1.6538	1.1299	1.0518		1.871	1.1643	0.99839	0.83331	0.78215		2.0441	1.3949	1.2147	0.88161	0.62765
4.0366	2.2828	1.7612	1.1299	1.1667		1.9262	1.2527	1.0535	0.83331	0.86318		2.024	1.5061	1.3212	0.92366	0.6837
4.1183	2.3254	1.7934	1.1703	0.98095		1.9314	1.2341	1.0432	0.86311	0.72731		1.6733	1.3528	1.2636	1.0078	0.96041
4.2109	2.1811	1.648	1.029	1.0927		1.9396	1.1779	0.98161	0.75881	0.80766		2.1288	1.3528	1.1345	0.79753	0.59565
3.8854	2.0575	1.5857	1.1501	1.1434		1.777	1.1234	0.9603	0.84821	0.84503		2.0212	1.5284	1.391	1.134	0.41633
3.4636	1.9651	1.5757	1.1299	1.4578		1.6697	1.1243	0.98049	0.83331	1.0782		2.2584	1.4683	1.2352	0.92366	0.8872
2.5992	1.6607	1.3791	1.0492	0.97637		1.2191	0.94171	0.86125	0.77371	0.7249		1.4525	1.2261	1.1366	0.92366	0.9303
3.4975	1.9577	1.5857	1.1905	0.79659		1.6867	1.1032	0.97381	0.87802	0.58941		1.5907	1.0919	0.97182	0.88161	0.73883
3.9555	2.2995	1.7929	1.1097	1.1639		1.82	1.2098	1.0353	0.81841	0.86237		1.2896	1.0083	0.91	0.67146	0.72234
4.8895	2.527	1.9104	1.2107	1.1087		2.2575	1.3992	1.1719	0.89292	0.8218		2.0245	1.3766	1.1737	0.79753	0.879
4.9183	2.621	2.0038	1.3318	1.3293		2.2918	1.4447	1.2129	0.98236	0.98371		1.9848	1.2431	1.0679	0.92366	0.85255
4.538	2.3214	1.8144	1.2914	1.1258		2.2318	1.353	1.1495	0.95254	0.83195		1.3857	0.96662	0.88168	0.83957	0.67883
4.8326	2.4362	1.8411	1.2107	1.3614		2.3706	1.4407	1.1893	0.89292	1.0071		1.7001	1.0551	0.88086	0.71348	0.96346
4.4797	2.2788	1.7325	1.1703	1.1216		2.2187	1.3185	1.0848	0.86311	0.82933		1.841	1.3007	1.168	1.0078	0.74897
4.6017	2.3704	1.7837	1.1703	1.1611		2.264	1.3675	1.1227	0.86311	0.85931		1.6243	1.1752	1.032	0.7555	1.1202
3.7856	1.9317	1.4639	1.0088	1.0906		1.6986	1.079	0.90715	0.74391	0.80643		2.5252	1.3036	1.0128	0.79753	0.80137
4.0694	1.9325	1.4584	1.1097	1.4304		1.8045	1.0511	0.88056	0.81841	1.0624		2.1853	1.2065	1.0222	1.0078	0.61094
3.5519	2.0697	1.6798	1.1905	0.95218		1.7231	1.1617	1.029	0.87802	0.70126		1.6045	1.0314	0.91316	0.83957	1.0627
4.8949	2.6617	2.1033	1.453	1.2726		2.3881	1.5006	1.2899	1.0718	0.94019		2.0086	1.3491	1.1875	1.0078	1.1044
4.618	2.5492	2.0365	1.5136	1.6116		2.1237	1.4244	1.2585	1.1166	1.1958		2.8055	1.7095	1.4771	1.2182	1.5201
3.8901	2.2122	1.7581	1.2107	1.2423		1.8086	1.2253	1.0668	0.89292	0.91708		1.6834	1.23	1.1307	1.0078	1.2496
3.5831	2.1421	1.7122	1.1501	1.1366		1.6634	1.1504	1.0067	0.84821	0.83621		1.77	1.2918	1.158	0.96571	0.77624
4.0229	2.4023	1.9054	1.2712	1.3194		1.9382	1.3501	1.1664	0.93764	0.9772		2.0283	1.5296	1.3601	0.96571	1.1138
3.5896	2.1844	1.7681	1.1905	1.2771		1.701	1.2053	1.0671	0.87802	0.94116		1.8873	1.3873	1.2436	0.92366	0.82131
3.03	1.9792	1.6684	1.1703	1.2644		1.4341	1.0699	0.97924	0.86311	0.93277		1.2488	0.95235	0.85811	0.67146	1.007
4.0763	2.4796	1.967	1.2712	1.2626		1.9273	1.3687	1.1924	0.93764	0.93375		1.893	1.4413	1.2967	0.96571	1.0381
4.2458	2.4904	1.9374	1.1905	1.2049		2.0412	1.3503	1.1384	0.87802	0.88913		2.4052	1.7526	1.545	1.0919	0.46525
3.9659	2.3722	1.8847	1.2712	1.2065		1.8558	1.2996	1.1316	0.93764	0.8943		2.1075	1.558	1.3944	1.0919	0.94126
4.3629	2.5048	1.9529	1.3116	1.2563		2.1539	1.4138	1.1943	0.96745	0.92876		2.4041	1.7745	1.5713	1.1761	1.1677
3.4377	2.0958	1.7078	1.2914	1.4475		1.5638	1.149	1.0362	0.95254	1.0681		1.7572	1.3549	1.2344	1.0919	1.2894
3.7509	2.111	1.6868	1.1501	1.2255		1.7872	1.1664	1.0142	0.84821	0.91121		1.7129	1.1614	1.0414	0.88161	1.5237
3.5706	2.1957	1.765	1.1299	1.2726		1.6139	1.1558	1.0209	0.83331	0.93843		1.8147	1.4506	1.3324	1.0078	1.2161
3.6738	2.1906	1.7651	1.2107	0.93179		1.6977	1.1779	1.0428	0.89292	0.68979		1.847	1.3841	1.2546	1.0078	0.65741
3.8582	2.391	1.915	1.2712	1.1079		1.7534	1.2823	1.1284	0.93764	0.81885		1.7702	1.4368	1.3241	1.0498	1.0334
4.5801	2.6093	1.9902	1.3116	1.2477		2.0567	1.3767	1.1644	0.96745	0.9208		2.1201	1.5649	1.3926	1.0919	1.0266
4.0081	2.4689	1.9804	1.3116	1.3678		1.8835	1.3308	1.1634	0.96745	1.0128		1.6709	1.3172	1.1956	0.92366	1.1077
3.8064	2.2778	1.8415	1.2712	1.0885		1.8206	1.2553	1.1072	0.93764	0.80433		1.6154	1.2518	1.1226	0.83957	0.42033
3.6454	2.227	1.8172	1.2107	1.0989		1.7697	1.2477	1.104	0.89292	0.81117		1.8468	1.3721	1.2087	0.83957	0.83241
4.029	2.3857	1.902	1.2107	1.2438		1.8703	1.2929	1.1257	0.89292	0.92112		2.1375	1.5303	1.3474	0.96571	0.90704
3.5129	2.279	1.9001	1.3318	1.5967		1.6404	1.2562	1.1497	0.98236	1.1787		1.937	1.5025	1.3632	1.0498	0.83676
4.3952	2.626	2.0977	1.3722	1.6009		2.0874	1.4406	1.2589	1.0122	1.1829		1.7544	1.3153	1.1921	1.0078	0.81834
3.4858	2.1283	1.7229	1.1501	1.3266		1.7036	1.1995	1.0559	0.84821	0.9822		1.4751	1.0703	0.94252	0.71348	1.0116
4.5985	2.4793	1.936	1.3318	1.3295		2.2031	1.3927	1.188	0.98236	0.98205		1.959	1.4193	1.2753	1.0498	0.90409
4.2084	2.5538	1.984	1.1905	1.148		1.9244	1.3329	1.1398	0.87802	0.85021		1.9369	1.428	1.2497	0.88161	0.51099
3.4985	2.1588	1.7745	1.1703	1.2165		1.7434	1.2276	1.0945	0.86311	0.90101		1.5072	1.0562	0.91714	0.67146	0.57278
4.2716	2.3414	1.8599	1.3116	1.4013		2.1528	1.3706	1.1797	0.96745	1.0342		3.5334	2.255	1.832	1.134	1.2336
4.0775	2.3032	1.8653	1.2712	1.2489		1.9806	1.3031	1.1507	0.93764	0.92338		2.3737	1.3562	1.1163	0.79753	0.51734
4.8727	2.4972	1.9653	1.3722	1.2704		2.1403	1.3294	1.1608	1.0122	0.93925		1.9583	1.1462	1.0193	0.96571	0.87682
3.5657	2.1234	1.7338	1.1905	1.2415		1.7115	1.2069	1.0766	0.87802	0.91909		1.5042	1.0423	0.91476	0.7555	0.96147
3.81	2.2213	1.7957	1.2309	1.0612		1.7756	1.2184	1.0755	0.90783	0.78614		1.4479	1.019	0.91252	0.79753	0.36746
3.6662	2.1539	1.7618	1.2309	1.2524		1.8014	1.2032	1.0626	0.90783	0.92542		1.9209	1.2235	1.0611	0.96571	0.9854
3.8028	2.1525	1.7605	1.3318	1.4016		1.7963	1.2005	1.0745	0.98236	1.0382		2.0702	1.3782	1.2188	1.134	0.61546
3.9883	2.3382	1.9076	1.4328	1.5911		1.7969	1.2504	1.1297	1.0569	1.1765		2.7373	1.4229	1.2126	1.134	0.80344
5.6518	2.8554	2.171	1.3722	1.2579		2.4458	1.4811	1.2521	1.0122	0.92711		3.7169	1.9651	1.5628	1.134	1.3713
4.606	2.5306	1.9406	1.2511	1.2219		2.04	1.3775	1.1758	0.92273	0.90276		2.3732	1.6468	1.463	1.134	0.86997
4.4885	2.6899	2.1255	1.2712	1.3924		2.0063	1.3827	1.2018	0.93764	1.0308		1.7091	1.3083	1.1871	0.92366	1.0648
4.3001	2.4238	1.9319	1.2914	1.4119		1.9677	1.3234	1.1544	0.95254	1.0498		1.7887	1.2769	1.1573	0.96571	0.99412
4.2974	2.4048	1.9013	1.2511	1.1367		1.9233	1.2846	1.1193	0.92273	0.84158		1.6503	1.321	1.2344	1.0919	0.83695
4.6079	2.5363	1.9527	1.2511	1.1895		2.0387	1.3166	1.1245	0.92273	0.87806		1.6559	1.3381	1.2227	1.0498	1.0097
4.4107	2.455	1.9267	1.2309	1.292		2.1104	1.3547	1.1588	0.90783	0.95893		1.843	1.3491	1.1747	0.79753	0.8653
5.3308	2.5771	1.9506	1.3318	1.3506		2.4661	1.4587	1.2143	0.98236	1.001		1.9402	1.184	1.0027	0.88161	1.2315
6.0596	2.7769	2.0527	1.4328	1.4885		2.8932	1.6273	1.3198	1.0569	1.097		2.5046	1.5177	1.212	0.83957	1.5177
4.3095	2.2441	1.7689	1.2914	1.2516		2.049	1.2722	1.094	0.95254	0.92406		1.5837	1.0556	0.8849	0.67146	1.0832
5.208	2.6769	2.1099	1.4934	1.5594		2.4958	1.5247	1.3023	1.1017	1.1541		2.6583	1.5984	1.412	1.3024	0.90634
5.5499	2.7873	2.1484	1.4732	1.5855		2.7525	1.5994	1.3375	1.0867	1.1752		2.546	1.6232	1.4048	1.134	1.0774
6.3335	2.8967	2.0886	1.4126	1.2726		2.7443	1.5627	1.2553	1.042	0.94195		3.4376	1.6242	1.303	1.1761	0.74666
4.1469	2.3401	1.8607	1.1905	1.2933		1.9356	1.2938	1.1302	0.87802	0.9544		1.3194	0.95371	0.8443	0.62945	0.89386
4.3197	2.566	2.0747	1.4328	1.6954		2.0535	1.4217	1.2507	1.0569	1.2539		1.847	1.4616	1.3353	1.0919	0.97509
4.4131	2.6888	2.1821	1.5136	1.5094		2.062	1.4783	1.3138	1.1166	1.1198		2.1465	1.6799	1.5563	1.2603	1.3584
4.868	2.8089	2.1954	1.352	1.4455		2.2487	1.4958	1.2801	0.99727	1.0665		2.3149	1.5663	1.3261	0.88161	1.2051
4.9766	2.838	2.1993	1.3722	1.5534		2.4082	1.5598	1.3108	1.0122	1.1484		2.3891	1.7575	1.5636	1.1761	1.195
4.5977	2.7038	2.2034	1.5136	1.4368		2.1216	1.4727	1.3149	1.1166	1.0616		1.5655	1.1899	1.1015	0.96571	1.2023
4.2988	2.5211	2.0354	1.3722	1.1833		1.9544	1.363	1.2168	1.0122	0.87618		1.7066	1.2369	1.1018	0.88161	0.82667
5.6009	2.925	2.2521	1.5944	1.6082		2.5904	1.6521	1.4033	1.1762	1.1909		2.1217	1.436	1.2159	1.0078	1.04
2.8207	1.6304	1.3146	1.0088	1.0792		1.3715	0.9183	0.80503	0.74391	0.79511		1.2383	0.97234	0.90188	0.79753	1.0327
4.2585	2.474	2.0009	1.3722	1.6009		1.99	1.3761	1.2228	1.0122	1.1852		1.9289	1.2822	1.1345	0.92366	1.3143
4.7748	2.7398	2.1834	1.4732	1.4047		2.2727	1.555	1.3627	1.0867	1.037		4.0532	2.3433	1.7948	1.0078	1.2048
4.6856	2.6031	2.0453	1.4328	1.4669		2.1708	1.4283	1.2363	1.0569	1.0831		2.0477	1.4416	1.2741	1.0498	1.2477
4.3033	2.3579	1.8681	1.2309	1.0976		1.9775	1.2911	1.1258	0.90783	0.81237		1.6254	1.2145	1.0998	0.88161	1.0028
6.912	3.2705	2.4502	1.6146	1.6812		3.2569	1.8944	1.5664	1.1912	1.2415		2.5146	1.5141	1.1881	0.92366	1.4587
4.2989	2.619	2.1332	1.453	1.39		2.0191	1.431	1.2714	1.0718	1.0285		2.7077	1.7104	1.4674	1.2182	1.3035
4.2199	2.478	2.0103	1.3116	1.0837		1.9951	1.4082	1.2487	0.96745	0.79907		1.8709	1.1419	0.95047	0.7555	0.69357
4.0735	2.3883	1.9303	1.3116	1.5001		1.9481	1.3097	1.1465	0.96745	1.1075		1.959	1.3445	1.204	1.0078	0.88644
3.8736	2.2765	1.8485	1.2107	1.3478		1.776	1.242	1.1079	0.89292	0.99838		1.6986	1.2034	1.0724	0.83957	0.65516
3.5687	2.2713	1.8947	1.3924	1.2712		1.7166	1.2641	1.1485	1.0271	0.93976		1.9266	1.3598	1.237	1.134	0.55402
3.7835	2.3265	1.9148	1.2712	1.2589		1.7936	1.307	1.1767	0.93764	0.92978		1.6384	1.2432	1.132	0.92366	1.0029
4.2458	2.4931	2.0143	1.352	1.1926		2.0496	1.4163	1.2456	0.99727	0.88149		1.8189	1.3125	1.1533	0.92366	0.69887
4.0946	2.484	2.0269	1.3318	1.3453		1.9197	1.3863	1.2357	0.98236	0.99456		1.6943	1.2694	1.1469	0.92366	0.72853
4.5375	2.4916	1.9614	1.352	1.4005		2.1338	1.3841	1.1978	0.99727	1.034		2.6899	1.7839	1.5328	1.134	1.4265
4.1915	2.6322	2.1121	1.2712	1.3642		1.9168	1.3813	1.2118	0.93764	1.0096		2.0945	1.591	1.4258	1.0078	1.0702
5.2189	2.728	2.0973	1.453	1.4652		2.3694	1.4918	1.2729	1.0718	1.086		2.8592	1.8715	1.5901	1.134	0.98054
4.5532	2.6156	2.0317	1.3116	1.4397		2.133	1.421	1.2103	0.96745	1.064		2.4024	1.754	1.5522	1.134	1.3348
4.6788	2.7767	2.1865	1.4126	1.209		2.1238	1.4648	1.2657	1.042	0.89426		2.4635	1.8934	1.7244	1.4708	0.74025
4.3583	2.5429	2.0155	1.3116	1.1747		2.0284	1.3832	1.2055	0.96745	0.87308		1.714	1.2764	1.1353	0.83957	1.0402
4.1715	2.0925	1.6197	1.1703	1.0379		1.9599	1.1668	0.9901	0.86311	0.76966		2.3839	1.3013	1.1149	0.92366	0.41344
3.8853	2.2242	1.7075	1.0492	1.1006		1.8	1.1845	1.0007	0.77371	0.81528		1.2759	0.95927	0.8807	0.71348	1.294
3.3621	2.0357	1.6498	1.1501	1.1406		1.5592	1.0797	0.95699	0.84821	0.83978		1.9545	1.3349	1.1767	0.96571	0.87106
3.7878	2.1646	1.698	1.0693	1.1945		1.7734	1.1688	1.0052	0.78861	0.88468		1.2887	0.95687	0.87331	0.71348	0.61948
3.1008	1.7916	1.4689	1.0693	1.2085		1.396	0.94527	0.85421	0.78861	0.89712		1.3167	0.86781	0.79234	0.71348	0.93645
3.9726	2.1078	1.6358	1.1501	1.2536		1.7653	1.1371	0.98274	0.84821	0.92716		2.691	1.1436	0.85399	0.71348	0.78111
3.5423	1.9074	1.4728	1.029	1.1267		1.5776	1.0167	0.87144	0.75881	0.83584		2.2089	1.456	1.2569	0.96571	1.3474
4.004	2.1084	1.6587	1.1501	1.1488		1.8732	1.154	0.9972	0.84821	0.8498		1.3395	0.92423	0.80023	0.58745	0.87598
3.9918	2.2111	1.7244	1.0693	0.97363		1.9186	1.2354	1.0548	0.78861	0.7177		1.4435	0.8966	0.76522	0.58745	0.65884
3.4929	2.0168	1.6218	1.1097	1.0657		1.66	1.1212	0.98856	0.81841	0.7897		1.3423	1.0075	0.90125	0.67146	1.0931
3.8418	2.0062	1.5853	1.1097	0.95696		1.7728	1.1171	0.97421	0.81841	0.7079		1.5907	1.0165	0.89802	0.79753	0.64635
4.861	2.3774	1.8384	1.3116	1.4145		2.261	1.3409	1.1352	0.96745	1.0475		2.0023	1.203	1.0296	0.92366	1.0129
4.832	2.3817	1.8201	1.3116	1.4111		2.3337	1.3602	1.1283	0.96745	1.0459		1.9508	1.3063	1.1454	1.0498	1.1696
4.1372	2.1189	1.6926	1.352	1.3851		2.0199	1.233	1.0744	0.99727	1.0227		1.806	1.2736	1.138	1.0078	1.1947
5.4373	2.5026	1.8968	1.3722	1.5138		2.4964	1.4064	1.1766	1.0122	1.1221		2.4786	1.4429	1.2078	1.0919	1.002
5.0815	2.6095	2.0068	1.352	1.2599		2.3949	1.5025	1.2749	0.99727	0.93428		2.5101	1.4195	1.1371	0.83957	1.0505
5.5935	2.8528	2.1244	1.3924	1.6558		2.5935	1.5591	1.2797	1.0271	1.2238		2.3132	1.4117	1.2079	1.0498	1.0999
3.579	2.0585	1.6474	1.1097	1.1153		1.6767	1.1143	0.97266	0.81841	0.82325		1.3418	1.0439	0.94274	0.71348	0.65493
3.0378	1.9407	1.6023	1.0895	1.0652		1.4031	1.0262	0.92575	0.80351	0.78699		1.6657	1.2166	1.1057	0.88161	0.46701
5.5314	2.743	2.0472	1.3924	1.1669		2.6055	1.5081	1.2327	1.0271	0.86827		2.6939	1.7099	1.4758	1.2182	1.0504
4.8346	2.6738	2.1047	1.352	1.2545		2.3036	1.5258	1.3192	0.99727	0.92963		2.5793	1.4787	1.1805	0.83957	1.0752
5.5668	2.5637	1.9382	1.352	1.5994		2.6334	1.4848	1.2276	0.99727	1.1827		1.9093	1.1786	1.0109	0.83957	1.6414
5.4317	2.8838	2.2168	1.3722	1.2954		2.5479	1.6179	1.3666	1.0122	0.95668		2.6153	1.7215	1.4655	0.96571	0.86694
3.6765	2.2285	1.7958	1.1905	0.9762		1.8436	1.2691	1.1022	0.87802	0.72163		2.1827	1.6682	1.5333	1.3024	0.55499
3.9369	2.4182	1.9932	1.4126	1.4287		1.8738	1.3445	1.204	1.042	1.0544		2.4223	1.7086	1.4841	1.1761	1.7831
4.2222	2.5107	2.0406	1.4328	1.4616		1.9589	1.3649	1.2092	1.0569	1.078		2.81	1.9744	1.7818	1.513	1.0393
4.4106	2.5554	2.0253	1.2511	1.3858		1.9645	1.3209	1.15	0.92273	1.0249		1.7025	1.2931	1.1757	0.92366	1.4982
4.3527	2.5754	2.0875	1.3116	1.4402		1.9608	1.3548	1.2001	0.96745	1.0601		1.8293	1.3296	1.2275	1.0498	0.96319
4.6326	2.2093	1.7072	1.2712	1.1507		2.0949	1.1986	1.0238	0.93764	0.85047		2.1477	1.2352	1.1005	1.0078	0.62723
3.2233	1.8755	1.5372	1.0693	1.1172		1.5844	1.0703	0.94833	0.78861	0.82662		1.347	0.91959	0.80771	0.62945	0.71167
5.1486	2.3419	1.7709	1.2914	1.4253		2.3288	1.2925	1.082	0.95254	1.0532		2.8652	1.5635	1.2733	1.0498	0.69852
5.208	3.038	2.3278	1.1905	1.3676		2.4446	1.5846	1.3103	0.87802	1.0086		2.6291	1.9824	1.7665	1.3024	1.2518
3.7784	2.2937	1.8517	1.1905	1.0387		1.692	1.2142	1.0756	0.87802	0.76848		1.2982	1.0553	0.97225	0.79753	0.76561
4.563	2.4067	1.8634	1.1905	0.91174		2.0407	1.2731	1.0831	0.87802	0.67342		2.2231	1.4828	1.3107	1.0498	0.37756
4.6518	2.5777	2.0988	1.5136	1.5015		2.1256	1.45	1.3019	1.1166	1.1098		1.5824	0.98385	0.84902	0.83957	1.3685
6.269	2.9575	2.1201	1.4126	1.4142		3.0591	1.6895	1.3312	1.042	1.0438		6.2443	3.6223	2.7059	1.3445	0.63171
5.8791	2.8695	2.0952	1.3722	1.2		2.7568	1.5115	1.2105	1.0122	0.88714		2.3661	1.5426	1.3395	1.0919	0.86469
4.0852	2.1709	1.6412	1.0088	0.88243		1.7757	1.1209	0.94219	0.74391	0.65175		1.9829	1.2795	1.0689	0.7555	0.63201
3.3886	1.8767	1.4923	1.0088	0.88448		1.5278	1.0192	0.89304	0.74391	0.65495		1.5851	1.0996	0.99606	0.83957	0.60315
4.3576	2.3179	1.7853	1.0693	0.89291		1.9262	1.236	1.0516	0.78861	0.6614		2.1752	1.3458	1.099	0.79753	0.47449
4.5757	2.3329	1.8072	1.2107	0.9864		1.9536	1.2343	1.0654	0.89292	0.72985		2.2408	1.2117	1.0438	0.96571	0.78568
4.5739	2.354	1.8349	1.2914	1.1788		2.0148	1.263	1.0938	0.95254	0.87419		2.3299	1.3223	1.1413	1.0078	1.1821
4.8832	2.3632	1.8174	1.3116	1.2443		2.324	1.3299	1.1183	0.96745	0.91787		2.4385	1.328	1.158	1.2182	0.57503
5.6688	2.7251	2.0136	1.1501	0.97638		2.4854	1.4571	1.1878	0.84821	0.71886		3.6813	1.6629	1.1936	0.7555	0.67403
5.9099	2.899	2.1137	1.2511	1.2365		2.5365	1.544	1.2566	0.92273	0.91454		4.4492	2.0476	1.3412	0.7555	0.75994
5.2342	2.6133	1.9685	1.3116	1.4435		2.3297	1.4349	1.203	0.96745	1.0665		2.4307	1.1263	0.91245	0.83957	1.0639
5.87	2.8918	2.1295	1.2712	1.2485		2.5185	1.5364	1.2655	0.93764	0.92293		3.1038	1.8838	1.5332	1.0498	1.2433
4.0783	2.1137	1.6589	1.2511	1.0945		1.8426	1.178	1.0176	0.92273	0.81045		2.7857	1.2164	0.97843	1.0078	0.78503
4.4115	2.3577	1.8229	1.1097	1.0932		2.0294	1.3453	1.1454	0.81841	0.80533		3.2927	1.0503	0.66045	0.41949	0.38024
4.3862	2.2114	1.6942	1.1703	1.0645		2.0509	1.2552	1.0582	0.86311	0.78726		2.7049	1.2874	1.0317	0.88161	0.54785
3.6548	2.1182	1.6785	1.1299	1.0594		1.6521	1.144	1.0006	0.83331	0.7804		1.2134	0.76813	0.67823	0.71348	0.729
4.1586	2.1795	1.6871	1.1097	1.0379		1.8443	1.1891	1.022	0.81841	0.76816		1.4866	0.7558	0.64456	0.67146	0.93302
4.138	2.197	1.7029	1.0895	1.0019		1.8086	1.1631	0.99667	0.80351	0.74349		2.1297	1.301	1.1032	0.88161	0.62309
4.1913	2.1961	1.6838	1.1703	1.1833		1.8809	1.1896	1.0118	0.86311	0.87381		3.214	1.3439	1.0621	1.0498	0.92421
3.541	1.9739	1.6049	1.1501	1.2321		1.6151	1.0999	0.9894	0.84821	0.91293		1.7876	1.0056	0.84705	0.7555	0.85928
6.694	3.2569	2.3287	1.2107	1.1219		2.871	1.7518	1.3948	0.89292	0.82939		8.5734	3.3501	2.0141	0.92366	0.80497
3.7982	2.1048	1.726	1.352	1.5415		1.6992	1.1633	1.0528	0.99727	1.1418		2.288	1.5525	1.3842	1.1761	1.1047
4.7151	2.7966	2.2142	1.352	1.5097		2.2692	1.601	1.3831	0.99727	1.1132		1.8445	1.416	1.2703	0.96571	0.66155
5.6098	2.9508	2.1612	1.2107	1.3692		2.4057	1.5442	1.2661	0.89292	1.0154		2.392	1.0569	0.79875	0.67146	0.81544
5.4454	2.6413	1.9254	1.1703	1.0886		2.3559	1.405	1.1494	0.86311	0.80499		4.5594	2.1333	1.4351	0.7555	0.86302
3.9498	1.9918	1.5521	1.1501	1.0678		1.8592	1.1246	0.95751	0.84821	0.78468		2.0321	1.247	1.0954	0.96571	0.65356
4.5347	2.4613	1.921	1.2309	1.4642		1.9633	1.3013	1.1276	0.90783	1.0821		1.8332	1.0072	0.8212	0.71348	1.321
4.1592	2.41	1.9618	1.3318	1.3957		1.9321	1.3408	1.1948	0.98236	1.0338		2.3299	1.2339	1.0023	0.79753	1.0744
5.1094	2.903	2.2373	1.3116	1.1082		2.4231	1.5837	1.325	0.96745	0.81913		2.9126	1.961	1.6536	1.134	0.84678
4.4159	2.6241	2.1259	1.4126	1.7264		2.126	1.4548	1.2802	1.042	1.2759		2.1189	1.5046	1.3164	0.92366	1.11
5.4961	2.8195	2.1942	1.5338	1.619		2.5424	1.5466	1.3237	1.1315	1.1985		2.1493	1.6544	1.4933	1.134	0.99962
5.1087	2.9098	2.2847	1.5136	1.5497		2.401	1.5729	1.3501	1.1166	1.1467		2.391	1.7712	1.5701	1.1761	1.2927
5.3431	2.7832	2.1206	1.3116	1.3524		2.4791	1.5068	1.259	0.96745	1.0032		2.6592	1.7672	1.5055	1.0078	0.84838
4.3882	2.6688	2.1651	1.453	1.7489		1.9937	1.4127	1.2589	1.0718	1.2867		2.0665	1.5939	1.4519	1.1761	1.0562
4.5451	2.6011	2.1117	1.5136	1.6933		2.1991	1.4702	1.2956	1.1166	1.2541		2.1508	1.5502	1.384	1.134	1.3808
5.5275	2.9093	2.3347	1.7964	2.0575		2.5985	1.6464	1.4482	1.3255	1.5188		2.6342	1.752	1.5901	1.4287	1.3061
4.7546	2.704	2.1118	1.3924	1.3982		2.2154	1.4583	1.2487	1.0271	1.038		2.694	1.9389	1.6996	1.2182	1.3391
4.4067	2.6077	2.074	1.352	1.4027		2.0742	1.4242	1.2379	0.99727	1.0401		1.9964	1.5289	1.3619	0.96571	1.6694
4.5098	2.8741	2.3187	1.4732	1.7316		2.1614	1.5564	1.3608	1.0867	1.2763		2.5738	2.0505	1.8733	1.3866	1.0313
5.0458	2.6747	2.0804	1.4126	1.3828		2.3916	1.4784	1.2547	1.042	1.0237		2.0277	1.4205	1.2409	0.96571	1.3046
4.1028	2.5632	2.1134	1.5136	1.5188		1.9439	1.4126	1.2737	1.1166	1.1234		2.7437	1.9266	1.692	1.2182	1.2047
5.0194	2.7501	2.1976	1.5136	1.5268		2.4406	1.5498	1.3458	1.1166	1.1339		2.6794	1.7225	1.4711	1.0498	1.7219
4.0439	2.4415	1.9855	1.4126	1.4087		1.8891	1.3579	1.2089	1.042	1.0436		1.7802	1.3998	1.2821	1.0078	0.90516
4.0556	2.2995	1.8545	1.3116	1.1508		2.0263	1.3082	1.1475	0.96745	0.84996		3.2543	1.7013	1.3506	0.96571	0.60539
5.0959	2.6502	2.0658	1.3722	1.4098		2.3055	1.4212	1.2121	1.0122	1.0406		2.5579	1.3727	1.101	0.83957	1.5132
5.555	2.3818	1.6615	1.0895	1.1951		2.807	1.4063	1.0689	0.80351	0.88194		3.3637	2.0312	1.5707	0.79753	0.75764
4.3443	2.5062	2.0125	1.4328	1.3215		1.915	1.3114	1.1719	1.0569	0.97907		2.2731	1.6078	1.452	1.1761	0.8551
4.1567	2.1924	1.7576	1.1905	1.1111		1.9088	1.1941	1.0481	0.87802	0.82341		1.0997	0.75988	0.68477	0.58745	0.69695
4.4945	2.7106	2.1926	1.5136	1.3935		2.2282	1.5474	1.3538	1.1166	1.0302		2.365	1.7999	1.5994	1.1761	0.83069
5.4186	3.0372	2.3635	1.6348	1.4711		2.6262	1.7153	1.4537	1.2061	1.0902		1.8083	1.3867	1.2745	1.134	1.1426
5.9044	3.2936	2.5769	1.6954	1.2812		2.5288	1.7514	1.5197	1.2508	0.94547		4.4086	2.3817	1.9192	1.5551	0.91052
5.982	3.278	2.5263	1.5944	1.578		2.5959	1.76	1.5047	1.1762	1.1676		3.2419	1.7685	1.404	1.1761	1.1904
5.808	3.3296	2.6364	1.756	1.6878		2.55	1.7504	1.5238	1.2956	1.2483		3.3771	2.1672	1.833	1.513	1.216
5.0773	2.9338	2.3403	1.5742	1.6416		2.3502	1.6105	1.4086	1.1613	1.2124		3.3981	1.8026	1.4411	1.134	0.96261
5.2104	2.9412	2.3449	1.5742	1.7939		2.413	1.6319	1.4163	1.1613	1.3284		3.2811	1.8233	1.4805	1.2603	0.88351
5.0196	2.9782	2.3749	1.5944	1.5474		2.3212	1.6507	1.4435	1.1762	1.1443		3.043	1.7517	1.3941	1.134	0.79955
4.3738	2.8405	2.3841	1.6752	1.64		2.0659	1.5763	1.44	1.2359	1.2142		2.2727	1.592	1.4064	1.2182	1.5564
5.5499	3.1226	2.4808	1.554	1.5367		2.5326	1.6976	1.4758	1.1464	1.1403		2.8356	1.6401	1.3841	1.0919	1.3814
5.6972	3.1289	2.4397	1.5944	1.5941		2.4858	1.6569	1.4338	1.1762	1.1746		2.6648	1.6218	1.3329	1.0498	1.3878
5.2951	2.959	2.3261	1.4328	1.382		2.3454	1.5582	1.3547	1.0569	1.021		1.958	1.3393	1.1957	0.96571	0.72498
5.913	3.4368	2.7059	1.6954	1.2333		2.6001	1.8129	1.5777	1.2508	0.90875		2.9032	1.5958	1.2991	1.0498	1.0337
6.1708	3.4287	2.6551	1.6146	1.7476		2.6472	1.771	1.5199	1.1912	1.2927		3.6504	2.0536	1.6514	1.1761	1.4945
5.134	3.0347	2.3975	1.3722	1.5706		2.2884	1.5876	1.3745	1.0122	1.1645		2.0765	1.3782	1.1778	0.92366	1.3119
5.2191	3.1091	2.4671	1.554	1.5761		2.2932	1.6545	1.4528	1.1464	1.1693		2.2334	1.6087	1.4457	1.2182	1.2635
5.3186	3.0345	2.3829	1.4934	1.6275		2.383	1.6443	1.4254	1.1017	1.2026		2.7787	1.5524	1.2126	0.88161	0.73746
5.6205	3.1238	2.4428	1.5338	1.4777		2.5177	1.703	1.4691	1.1315	1.0918		3.2594	1.671	1.3046	1.0078	0.9577
5.5849	3.1744	2.5145	1.554	1.442		2.4341	1.6683	1.4604	1.1464	1.0671		1.8907	1.2534	1.0909	0.88161	0.84375
5.9999	3.1777	2.4726	1.4732	1.624		2.6319	1.6503	1.4115	1.0867	1.2028		1.8664	1.0462	0.86091	0.67146	1.2059
5.4282	3.0926	2.4474	1.5742	1.6054		2.5187	1.7324	1.5002	1.1613	1.1882		2.9828	1.9306	1.6139	1.2182	0.95321
4.9068	2.9053	2.3563	1.5944	1.6415		2.2609	1.5832	1.402	1.1762	1.2153		2.747	1.9112	1.6696	1.3445	1.0312
4.7521	2.8147	2.3114	1.5742	1.6266		2.2088	1.5591	1.4009	1.1613	1.2086		2.2755	1.6364	1.4855	1.2603	1.2822
6.6081	3.4968	2.6587	1.554	1.3188		2.9129	1.837	1.5391	1.1464	0.97415		3.6331	2.1139	1.6779	1.1761	0.98926
4.7845	2.9157	2.3485	1.5136	1.3381		2.2046	1.6019	1.4148	1.1166	0.98869		2.0379	1.4739	1.3192	1.0919	1.0352
5.0466	2.885	2.3107	1.4732	1.407		2.2494	1.5584	1.3757	1.0867	1.0423		1.4478	1.0659	0.97389	0.79753	0.96433
6.264	3.4521	2.6956	1.756	1.836		2.9312	1.9065	1.6211	1.2956	1.3677		5.5041	2.7996	2.1521	1.5972	1.3632
4.549	2.5311	2.0163	1.3722	1.2845		2.0283	1.3717	1.2124	1.0122	0.94791		1.5603	1.1117	1.0164	0.88161	1.0261
4.9694	2.4337	1.9094	1.3318	1.2438		2.3406	1.3774	1.1819	0.98236	0.91874		1.9962	1.1931	1.029	0.92366	1.2359
4.4409	2.5246	2.0348	1.2914	1.2516		1.9692	1.3613	1.2078	0.95254	0.9282		1.6001	1.1106	0.99304	0.83957	1.4743
4.8771	2.617	2.0724	1.3924	1.5113		2.1687	1.413	1.2381	1.0271	1.1148		1.92	1.1597	0.98291	0.83957	1.0482
5.8325	3.1897	2.5063	1.6752	1.5004		2.6187	1.7262	1.4966	1.2359	1.106		2.3089	1.6423	1.4343	1.1761	0.93706
4.4356	2.5665	2.0497	1.3722	1.282		2.0659	1.4202	1.2419	1.0122	0.94679		2.4521	1.4355	1.2191	1.0498	1.0454
5.4407	2.3416	1.6417	1.0088	0.94499		2.5439	1.3156	1.0139	0.74391	0.70055		3.5984	1.5105	1.0615	0.7555	0.44096
4.0073	1.9753	1.4904	1.1097	1.211		2.0304	1.1655	0.95658	0.81841	0.89626		3.8793	2.2236	1.6893	1.0498	1.0569
4.0888	2.0269	1.556	1.0895	1.1197		1.9935	1.1626	0.9772	0.80351	0.83008		1.4302	0.91734	0.799	0.67146	1.0141
2.6074	1.5461	1.283	0.90786	1.1771		1.3427	0.92286	0.82617	0.66944	0.86852		1.098	0.68572	0.58803	0.50345	0.69501
5.1247	2.4001	1.8036	1.2914	1.3652		2.4138	1.3657	1.1229	0.95254	1.0089		1.6181	1.0656	0.957	0.88161	0.95062
4.5985	2.6187	2.1015	1.4328	1.4391		2.0103	1.3729	1.2152	1.0569	1.0624		1.731	1.3837	1.3296	1.2603	1.106
3.1805	1.8568	1.4326	0.88768	0.87242		1.4925	0.99283	0.83806	0.65454	0.64676		1.3044	0.93917	0.82692	0.58745	1.0012
4.2441	2.4493	1.9313	1.2511	1.2766		2.0185	1.3574	1.1661	0.92273	0.94581		2.3805	1.7533	1.5455	1.0919	0.87546
5.8886	3.3575	2.5889	1.7156	1.7576		2.7172	1.8059	1.5316	1.2658	1.3012		2.5736	1.7988	1.6175	1.4287	1.6927
4.6666	2.7807	2.2306	1.3722	1.4779		2.1533	1.5211	1.3367	1.0122	1.0918		1.7529	1.2951	1.1547	0.92366	1.1923
4.3889	2.533	1.9725	1.1703	1.0663		1.9909	1.3199	1.1294	0.86311	0.78778		1.7616	1.2628	1.115	0.88161	0.76091
5.7473	3.1197	2.363	1.3722	1.2473		2.5091	1.6612	1.391	1.0122	0.92682		2.4988	1.6544	1.3971	1.134	0.62538
4.0159	2.2239	1.7325	1.2309	1.2548		1.9259	1.2489	1.0623	0.90783	0.92724		1.8234	1.4732	1.3449	1.0498	0.99084
4.1779	2.2912	1.7424	0.9886	0.75082		2.0018	1.2737	1.0564	0.72902	0.5554		1.8357	1.3302	1.1642	0.83957	0.55563
4.9767	2.4816	1.8883	1.352	1.7572		2.2951	1.4123	1.192	0.99727	1.2991		3.2115	1.9422	1.4962	0.96571	1.5134
4.9587	2.5198	1.9211	1.2511	1.3435		2.1279	1.3608	1.156	0.92273	0.99294		2.2955	1.3607	1.1525	0.88161	0.99605
4.4976	2.3659	1.8421	1.2914	1.3404		2.2565	1.3721	1.157	0.95254	0.99132		1.6333	1.1626	1.033	0.83957	0.94156
5.802	2.794	2.0859	1.4126	1.3722		2.9083	1.6527	1.3382	1.042	1.0129		2.9322	1.6742	1.3978	1.0498	1.2513
3.5656	1.9301	1.527	1.0492	1.142		1.6548	1.0429	0.90617	0.77371	0.84396		1.3557	0.96913	0.86078	0.67146	0.54949
4.932	2.5895	1.9948	1.3722	1.2214		2.2726	1.4159	1.1955	1.0122	0.90698		3.7482	2.1784	1.7306	1.3445	0.71286
4.3277	2.5947	2.1193	1.4328	1.5402		2.0265	1.4364	1.2837	1.0569	1.1386		2.0242	1.4265	1.2702	0.96571	0.61342
5.792	2.9912	2.2988	1.453	1.2881		2.743	1.6754	1.4116	1.0718	0.94857		2.1508	1.4218	1.2259	0.88161	0.8337
4.7118	2.6989	2.1587	1.3924	1.5718		2.1364	1.4596	1.2866	1.0271	1.1649		1.8801	1.2633	1.1041	0.79753	1.6744
4.5663	2.6117	2.1361	1.5136	1.759		2.077	1.4248	1.281	1.1166	1.3015		1.6469	1.2216	1.1352	1.0498	1.1233
5.5765	3.0377	2.3292	1.3924	1.3667		2.4087	1.6045	1.3638	1.0271	1.0081		2.1264	1.3101	1.1095	0.92366	1.0108
5.1935	2.7093	2.1497	1.453	1.3914		2.4241	1.5013	1.306	1.0718	1.0318		2.1846	1.4374	1.2591	0.96571	0.86674
4.2589	2.4947	2.0054	1.3116	1.4083		1.946	1.3549	1.2073	0.96745	1.0411		1.5041	1.032	0.92247	0.79753	1.0049
4.5589	2.5418	2.0476	1.4934	1.5262		2.1044	1.4055	1.2545	1.1017	1.1256		2.3252	1.4386	1.202	0.96571	1.4043
4.2112	2.5782	2.1573	1.4732	1.7559		2.0105	1.4297	1.2993	1.0867	1.3008		1.7669	1.2817	1.1567	0.96571	1.0132
5.9297	3.0027	2.2886	1.6752	1.7688		2.7368	1.6653	1.4022	1.2359	1.3086		2.5429	1.7489	1.5323	1.3024	1.702
5.0646	2.3245	1.7416	1.2309	1.2212		2.3798	1.2964	1.0619	0.90783	0.90421		2.2414	1.2498	1.0426	0.88161	1.1869
4.0022	2.5336	2.0815	1.352	1.4558		1.9733	1.4687	1.3144	0.99727	1.0776		1.593	1.1627	1.0215	0.7555	0.91443
5.967	3.1646	2.4324	1.6954	1.8047		2.7635	1.7402	1.4705	1.2508	1.3375		3.2334	2.0722	1.7479	1.3445	1.4509
5.8124	3.0501	2.3811	1.7156	1.7006		2.7031	1.6867	1.4405	1.2658	1.2603		2.4108	1.6677	1.45	1.1761	1.172
6.0238	3.1084	2.3472	1.5338	1.5809		2.7654	1.6863	1.3985	1.1315	1.1671		2.694	1.7929	1.5318	1.1761	0.8863
5.3313	2.7876	2.1158	1.3116	1.2353		2.3842	1.5529	1.307	0.96745	0.91129		2.2917	1.4904	1.2653	0.92366	0.56602
3.7829	1.9079	1.4411	0.96841	1.0838		1.6992	1.0334	0.86514	0.71412	0.80004		1.2593	0.86515	0.74817	0.58745	0.98218
6.9223	2.7993	1.9456	1.3116	1.3758		3.1145	1.5093	1.1607	0.96745	1.0167		3.9322	1.8471	1.4667	1.1761	1.0845
4.7184	2.2796	1.721	1.2107	0.93693		2.3269	1.2763	1.0507	0.89292	0.69347		2.0672	1.3282	1.1639	1.0078	0.58743
4.4542	2.3348	1.8128	1.2511	1.1285		1.9923	1.2443	1.068	0.92273	0.83508		2.0747	1.4809	1.3653	1.1761	0.9622
5.3265	3.2071	2.5419	1.5338	1.6505		2.3791	1.6584	1.4443	1.1315	1.2194		2.3135	1.6958	1.5168	1.2182	1.09
5.3765	2.6509	2.0243	1.3318	1.2892		2.4813	1.527	1.2909	0.98236	0.94734		4.2951	1.9825	1.4125	0.79753	0.67634
5.261	2.6054	2.0488	1.453	1.4603		2.4288	1.4562	1.2587	1.0718	1.0797		1.4882	0.97849	0.88028	0.79753	1.0092
4.5569	2.7479	2.2275	1.5136	1.338		2.073	1.4821	1.3213	1.1166	0.989		1.985	1.4507	1.3	1.0498	1.3333
4.2803	2.3702	1.8649	1.2712	1.2234		1.9409	1.2489	1.0812	0.93764	0.9042		2.1364	1.4835	1.3496	1.134	1.0936
4.5383	2.6278	2.1102	1.5136	1.4381		2.0728	1.412	1.2498	1.1166	1.0651		2.562	1.8951	1.7107	1.4287	0.92065
4.6969	2.757	2.235	1.5338	1.1766		2.2941	1.553	1.3587	1.1315	0.87062		2.5923	1.9163	1.7517	1.4708	0.74567
4.7197	2.753	2.2549	1.6752	1.7518		2.1544	1.5073	1.3583	1.2359	1.2963		1.979	1.5142	1.4303	1.3866	1.2503
5.6825	3.1356	2.4199	1.5338	1.6795		2.6076	1.7073	1.4523	1.1315	1.2419		3.0125	1.7961	1.535	1.1761	0.68892
5.089	3.0403	2.411	1.5136	1.7447		2.2846	1.6109	1.4066	1.1166	1.2884		1.9726	1.5147	1.3622	1.0498	0.83348
4.9032	2.8731	2.3519	1.5944	1.6108		2.1692	1.5174	1.3716	1.1762	1.1914		1.9532	1.4285	1.3039	1.0498	1.1073
4.5111	2.7201	2.1897	1.352	1.354		2.087	1.4612	1.2845	0.99727	1.0034		1.9558	1.3514	1.205	1.0078	0.96883
4.7341	2.7463	2.2273	1.4732	1.3769		2.1969	1.5048	1.3296	1.0867	1.019		2.3596	1.741	1.5903	1.3866	1.1142
3.9136	2.4892	2.1234	1.5338	1.355		1.8435	1.3595	1.2583	1.1315	0.99848		1.7492	1.3314	1.2412	1.0919	0.84097
3.7189	2.3947	2.033	1.4934	1.4304		1.7852	1.3548	1.2499	1.1017	1.0579		1.6173	1.2569	1.1358	0.92366	0.90196
5.7388	3.1118	2.4432	1.5944	1.6263		2.5422	1.6424	1.4217	1.1762	1.2004		3.0866	1.8396	1.5356	1.2182	1.2284
5.1504	2.9993	2.3666	1.4732	1.5586		2.4352	1.674	1.4401	1.0867	1.1542		2.1753	1.7022	1.5331	1.2603	1.2332
4.6533	2.8015	2.2323	1.453	1.3148		2.0987	1.5073	1.3244	1.0718	0.97194		2.0374	1.4551	1.2943	1.0498	1.0624
5.9164	2.669	1.9503	1.3318	1.4103		2.8567	1.5073	1.2039	0.98236	1.0418		2.5309	1.4821	1.2571	0.96571	0.86676
4.2059	2.3392	1.8453	1.3116	1.3084		2.0477	1.3475	1.1535	0.96745	0.97133		2.9255	1.9386	1.6374	1.1761	0.66507
6.8798	3.2174	2.3207	1.453	1.3847		3.3081	1.8118	1.4194	1.0718	1.0238		2.426	1.6859	1.4514	1.0078	0.7012
3.8053	2.133	1.7513	1.2107	1.1423		1.822	1.1977	1.0726	0.89292	0.84327		0.99308	0.7198	0.67774	0.62945	1.1565
4.1284	2.4204	1.953	1.2914	1.0295		1.9437	1.3494	1.1999	0.95254	0.76413		0.93826	0.64701	0.57961	0.50345	0.61136
8.1752	3.6402	2.6086	1.554	1.5088		3.8994	1.9684	1.5426	1.1464	1.1169		4.8333	2.5347	1.9884	1.0919	0.7515
6.6972	3.1834	2.323	1.4732	1.5721		3.1872	1.7352	1.3881	1.0867	1.1631		3.7745	2.3377	1.9382	1.2603	1.492
5.7453	2.9675	2.2297	1.4126	1.558		2.6688	1.6279	1.3418	1.042	1.1568		3.1578	2.1801	1.8556	1.2182	0.99763
5.5793	2.3318	1.5835	1.029	1.168		2.5322	1.27	0.95613	0.75881	0.86261		2.6001	1.38	1.079	0.83957	1.0553
4.1465	1.8898	1.3915	0.90786	1.063		1.8428	1.0459	0.85633	0.66944	0.78838		1.0653	0.58357	0.49042	0.50345	0.56551
4.3632	2.0503	1.4918	0.94823	1.0765		2.0973	1.1544	0.91808	0.69922	0.79426		2.3208	1.3374	1.0791	0.67146	0.66178
5.8546	2.4343	1.7083	1.1905	1.1807		2.6291	1.358	1.0574	0.87802	0.87014		4.2383	1.8871	1.3515	1.0078	0.45406
2.6756	1.4921	1.1336	0.66568	0.54515		1.2361	0.78705	0.65969	0.49077	0.40405		1.1357	0.80737	0.69925	0.46147	0.47714
2.617	1.454	1.1785	0.84731	0.72227		1.2111	0.80009	0.71154	0.62476	0.53245		1.4151	0.88263	0.76617	0.62945	0.7583
6.1775	2.9206	2.077	1.2309	1.2446		2.8438	1.5929	1.2484	0.90783	0.92567		3.5714	2.22	1.748	1.0078	0.76863
5.943	2.7684	1.986	1.3722	1.6271		3.0336	1.64	1.2736	1.0122	1.2057		3.9595	2.3612	1.9346	1.3024	1.1365
5.085	2.9214	2.3811	1.7156	1.8323		2.4595	1.6742	1.4861	1.2658	1.3574		2.0265	1.4812	1.3344	1.2182	1.2161
4.7731	2.7338	2.2101	1.6146	1.6781		2.274	1.5504	1.3672	1.1912	1.2421		2.4994	1.6593	1.4299	1.1761	0.949
4.9688	2.8358	2.2636	1.6954	1.5554		2.4148	1.602	1.3955	1.2508	1.1511		3.1736	2.0261	1.6878	1.3024	1.6759
4.3384	2.5994	2.1237	1.4934	1.5979		2.1434	1.4841	1.3131	1.1017	1.1803		2.0984	1.6071	1.4521	1.0919	1.0029
5.2119	3.0367	2.3911	1.4934	1.5199		2.4416	1.6247	1.3971	1.1017	1.1234		2.7672	1.8588	1.5943	1.1761	1.2709
5.5148	2.5973	1.9225	1.2107	1.2509		2.6776	1.5133	1.2234	0.89292	0.92515		1.6717	1.0106	0.82396	0.62945	1.0521
5.2495	2.9293	2.3035	1.5338	1.607		2.5855	1.6691	1.4259	1.1315	1.1915		2.9655	1.627	1.3168	1.0919	1.5117
6.1688	3.3188	2.549	1.4328	1.3701		2.8653	1.8954	1.5935	1.0569	1.0122		3.9255	1.6013	1.0855	0.58745	0.84737
6.5974	3.3349	2.513	1.3924	1.4342		2.9593	1.8471	1.5335	1.0271	1.0583		2.3262	1.0174	0.8041	0.58745	0.8939
4.9127	3.0324	2.4031	1.4732	1.4473		2.3237	1.6411	1.4196	1.0867	1.0686		2.5562	1.946	1.7432	1.2182	1.4595
4.7385	2.7147	2.1726	1.4934	1.7735		2.1731	1.499	1.3295	1.1017	1.312		2.5259	1.7075	1.4758	1.0919	1.0035
4.9008	2.9407	2.3952	1.655	1.8037		2.2927	1.6196	1.4458	1.221	1.3309		2.938	2.0607	1.8297	1.3445	1.5142
4.9878	2.93	2.3424	1.554	1.6364		2.2781	1.5809	1.388	1.1464	1.2086		2.6286	1.8593	1.6518	1.2603	1.1303
5.4178	3.0643	2.3483	1.4328	1.5087		2.47	1.6619	1.4056	1.0569	1.1114		3.1197	2.1532	1.8343	1.2182	1.468
4.8948	2.9434	2.3294	1.453	1.3148		2.2647	1.5883	1.3871	1.0718	0.97372		2.0638	1.5313	1.3591	0.96571	1.4195
5.4429	3.0138	2.2982	1.4126	1.2351		2.5336	1.6274	1.3637	1.042	0.91359		2.4409	1.8291	1.6106	1.134	1.1661
5.7943	3.1415	2.3562	1.1703	1.39		2.5949	1.583	1.2975	0.86311	1.0264		2.1639	1.3311	1.1165	0.83957	1.3019
4.6539	2.6072	2.0368	1.2712	1.0918		2.0646	1.3683	1.1834	0.93764	0.80562		1.9889	1.4058	1.244	0.92366	0.57483
4.6216	2.7454	2.1963	1.4732	1.4463		2.1147	1.4778	1.2988	1.0867	1.0632		2.4126	1.7475	1.5316	1.134	0.60122
6.0145	2.7906	2.0271	1.3318	1.6673		2.8489	1.5829	1.2667	0.98236	1.2323		2.7883	1.6691	1.3334	0.83957	0.89158
4.8326	2.7056	2.1543	1.352	1.3805		2.1965	1.4969	1.3097	0.99727	1.0192		1.9976	1.4004	1.2611	1.0078	0.99958
5.1879	3.182	2.4291	1.352	1.5738		2.4175	1.6694	1.3884	0.99727	1.1582		2.8354	2.1791	1.9374	1.3445	0.95953
5.3478	2.9384	2.2336	1.2712	1.1839		2.3566	1.5272	1.2835	0.93764	0.8755		2.3913	1.6754	1.4696	1.0919	0.8923
5.7986	2.6674	1.9684	1.4328	1.3424		2.885	1.5345	1.2323	1.0569	0.99404		2.5482	1.5559	1.3444	1.134	0.96794
6.805	3.2451	2.2998	1.4934	1.4535		3.423	1.9697	1.5208	1.1017	1.0736		5.1161	3.3104	2.5991	1.4287	0.75372
5.0427	2.575	1.926	1.2712	1.2381		2.3474	1.4908	1.2309	0.93764	0.91443		1.9174	1.3537	1.231	1.0498	0.82675
4.8512	2.7165	2.094	1.2309	1.3156		2.1537	1.4351	1.2195	0.90783	0.97085		2.6673	1.8695	1.6072	1.2603	0.89297
5.1202	2.6501	2.0635	1.4732	1.29		2.4224	1.4864	1.2633	1.0867	0.95207		2.3181	1.6281	1.4287	1.134	0.85246
4.5395	2.8214	2.3523	1.6348	1.5203		2.0917	1.532	1.3941	1.2061	1.1274		2.3177	1.694	1.5615	1.3445	1.2123
4.9042	2.8801	2.3718	1.5742	1.5321		2.2616	1.5977	1.4365	1.1613	1.1321		1.6069	1.1069	0.99756	0.88161	1.153
4.4286	2.4665	1.9324	1.2511	1.3719		2.1116	1.3474	1.1527	0.92273	1.0173		1.4143	0.98828	0.86925	0.71348	1.0727
6.2495	3.4697	2.6987	1.5742	1.254		2.7465	1.8149	1.5555	1.1613	0.92758		2.7633	1.8035	1.5126	1.134	0.96586
4.0957	2.3193	1.8116	1.2107	1.0806		2.0133	1.3206	1.1219	0.89292	0.8008		2.1761	1.5017	1.2741	0.88161	0.84604
4.6675	2.7155	2.1441	1.3924	1.3132		2.1899	1.4702	1.2672	1.0271	0.9752		3.0209	2.0934	1.8031	1.2182	0.88323
5.385	3.1008	2.5207	1.6146	1.6957		2.4146	1.6559	1.4751	1.1912	1.2557		2.3274	1.6069	1.4725	1.2182	1.34
5.0767	3.0705	2.4579	1.5136	1.5637		2.3437	1.6522	1.4435	1.1166	1.1546		2.3724	1.6324	1.4471	1.2182	1.4737
4.6639	2.8311	2.3077	1.5338	1.3329		2.1473	1.5308	1.3649	1.1315	0.98451		2.3543	1.6953	1.508	1.1761	0.94558
4.9716	2.8752	2.2853	1.6752	1.7308		2.1612	1.5363	1.3645	1.2359	1.2782		2.9304	1.8897	1.6037	1.3445	1.6415
4.4988	2.883	2.3993	1.5742	1.5132		2.0739	1.5417	1.4009	1.1613	1.1163		2.0084	1.5198	1.3767	1.0919	1.1843
7.5598	3.4845	2.5181	1.6348	1.8332		3.5246	1.9474	1.548	1.2061	1.3576		6.1543	2.7603	1.9901	1.3445	1.4305
5.779	3.0508	2.3383	1.4934	1.611		2.6689	1.6613	1.3987	1.1017	1.1912		2.4657	1.7173	1.496	1.134	1.3323
5.5549	2.931	2.3178	1.6348	1.8966		2.6285	1.6741	1.4509	1.2061	1.401		1.999	1.3152	1.1294	0.96571	1.5572
5.6135	2.5725	1.8517	1.2309	1.3004		2.7215	1.4359	1.1374	0.90783	0.96206		2.4635	1.5242	1.2911	0.96571	1.2542
4.4158	2.3223	1.797	1.1097	1.2048		2.0491	1.253	1.0621	0.81841	0.89494		1.7566	1.135	0.95265	0.58745	0.81213
6.2986	2.9359	2.0721	1.1905	1.0503		3.0274	1.6218	1.2532	0.87802	0.7782		2.4949	1.6773	1.4291	0.92366	0.324
4.4965	2.9037	2.3721	1.4934	1.4518		2.0379	1.5055	1.3463	1.1017	1.073		1.777	1.4535	1.362	1.134	0.88265
4.7032	2.8337	2.2891	1.5338	1.4624		2.3966	1.6412	1.4409	1.1315	1.0777		2.4334	1.4172	1.2083	1.0498	0.87173
4.4505	2.3996	1.9481	1.3924	1.2485		2.1094	1.3782	1.2246	1.0271	0.92061		1.3957	0.88649	0.76743	0.67146	1.4206
5.9068	3.1542	2.3615	1.4934	1.5586		2.7561	1.7023	1.4027	1.1017	1.1502		2.6503	1.8023	1.5591	1.2603	1.1635
5.6704	3.3436	2.6093	1.453	1.5153		2.5296	1.7098	1.4615	1.0718	1.1204		2.8382	2.0956	1.8633	1.3866	0.95651
6.1686	3.2826	2.5099	1.4732	1.5511		2.8628	1.7647	1.4734	1.0867	1.1446		2.3136	1.4384	1.2091	0.88161	0.87998
5.3008	3.0012	2.3658	1.453	1.2711		2.4198	1.6477	1.4261	1.0718	0.94269		2.6755	1.9839	1.7763	1.3024	1.3257
5.5854	2.9318	2.2675	1.554	1.5774		2.5395	1.6613	1.4227	1.1464	1.1675		2.553	1.4152	1.1422	1.0078	0.98903
4.3629	2.2254	1.7207	1.1097	1.3376		1.934	1.1962	1.0156	0.81841	0.99076		1.9006	1.3018	1.1862	1.0078	1.0101
4.6691	2.3114	1.7521	1.1703	1.1013		2.2515	1.2893	1.0621	0.86311	0.81634		2.1254	1.2389	1.0479	0.79753	0.62225
6.4771	3.532	2.6566	1.554	1.3679		3.082	1.9007	1.5571	1.1464	1.0064		2.7124	1.9063	1.662	1.134	1.1566
6.0535	3.2253	2.3825	1.2914	1.4167		2.6086	1.6696	1.3712	0.95254	1.0481		2.6045	1.6158	1.364	1.134	1.0143
6.8667	3.6951	2.8174	1.6752	1.6885		3.1162	1.9959	1.6674	1.2359	1.2492		4.5335	2.4896	1.9579	1.4287	1.1959
6.3388	3.5203	2.7241	1.7358	1.6022		2.8373	1.8887	1.6141	1.2807	1.1854		3.713	2.0555	1.6752	1.3445	0.93042
5.903	3.354	2.6555	1.6954	1.4825		2.6544	1.8029	1.5679	1.2508	1.0994		2.6722	1.4865	1.2418	1.134	0.91908
5.5912	3.2144	2.5517	1.6954	1.6682		2.5423	1.7477	1.5258	1.2508	1.2355		3.0878	1.866	1.5801	1.3024	1.1912
6.5294	3.5602	2.7688	1.7156	1.6465		2.9553	1.9247	1.6425	1.2658	1.2125		2.7659	1.7543	1.5022	1.2182	1.4049
6.4449	3.5935	2.77	1.554	1.3255		2.7934	1.8655	1.5892	1.1464	0.98076		2.822	1.7231	1.4723	1.134	0.68627
7.7647	3.9008	2.9424	1.7762	1.6403		3.4464	2.1404	1.7798	1.3105	1.2159		5.2173	2.6388	1.9602	1.3445	1.1
5.4478	3.19	2.5985	1.7762	1.9261		2.4893	1.7335	1.5485	1.3105	1.424		2.168	1.8418	1.7591	1.513	0.94466
5.2008	3.0897	2.4635	1.5944	1.7712		2.2492	1.6332	1.4486	1.1762	1.313		2.2269	1.7535	1.6065	1.3445	1.3636
4.7748	2.9595	2.3973	1.5136	1.5107		2.134	1.5894	1.4188	1.1166	1.1188		2.305	1.8417	1.707	1.4287	0.9925
6.7293	3.4018	2.5635	1.5742	1.4748		2.969	1.8622	1.5556	1.1613	1.0906		2.3441	1.1826	1.0012	0.96571	1.1314
6.0208	3.4632	2.6325	1.3722	1.3137		2.7364	1.756	1.4631	1.0122	0.96995		2.9826	1.9839	1.7005	1.0919	1.0454
6.0692	3.3716	2.6549	1.6146	1.61		2.8208	1.9121	1.646	1.1912	1.1909		2.9658	1.6561	1.3873	1.0919	1.2233
6.2276	3.1802	2.3897	1.3318	1.2425		2.7808	1.7615	1.4655	0.98236	0.91876		5.173	1.1101	0.63969	0.37751	0.85415
6.5875	2.9607	2.053	1.2914	1.5511		3.3867	1.7216	1.287	0.95254	1.1459		3.3519	2.4123	2.0367	1.1761	1.4262
5.2273	3.0385	2.4184	1.6348	1.5503		2.5265	1.6824	1.453	1.2061	1.1442		3.0936	2.2066	1.9306	1.4287	1.3189
5.8682	3.2612	2.4967	1.5742	1.5303		2.8317	1.7885	1.4865	1.1613	1.1262		3.6563	2.6124	2.2775	1.5972	1.3745
6.3455	3.2783	2.502	1.6752	1.5688		2.9994	1.8247	1.5275	1.2359	1.1556		2.2939	1.7691	1.581	1.1761	1.3057
4.7622	2.7772	2.2526	1.554	1.5797		2.2213	1.5449	1.3696	1.1464	1.1702		2.1676	1.6305	1.4658	1.1761	1.4004
5.5379	3.2582	2.6303	1.8166	1.9284		2.5842	1.7812	1.5787	1.3404	1.426		2.4008	1.7255	1.5596	1.3445	1.4639
5.368	3.2554	2.5993	1.5944	1.5587		2.5218	1.728	1.4975	1.1762	1.1508		2.2643	1.786	1.6148	1.1761	0.90608
5.406	3.2651	2.6167	1.6752	1.4602		2.7503	1.8944	1.6429	1.2359	1.0795		2.5242	1.4944	1.2557	1.0078	0.57961
5.6136	3.2424	2.5701	1.5944	1.6394		2.6037	1.7471	1.5196	1.1762	1.2114		2.9825	2.0369	1.7521	1.1761	1.1096
5.9143	2.3522	1.638	1.029	1.124		2.8728	1.3744	1.0494	0.75881	0.83009		1.9334	1.1132	0.85424	0.54545	0.96396
5.6558	3.3613	2.656	1.5742	1.8157		2.5696	1.7804	1.5385	1.1613	1.3439		2.8269	2.0825	1.8721	1.4287	1.1996
5.946	3.3341	2.5717	1.5944	1.5976		2.9132	1.8927	1.5823	1.1762	1.1831		3.0907	2.2065	1.9083	1.3024	0.8319
4.2257	2.1511	1.6297	1.1905	1.4676		1.9019	1.1618	0.98003	0.87802	1.0825		5.1015	2.5117	1.7549	1.1761	0.67026
5.9559	3.3351	2.5663	1.453	1.5614		3.1094	1.9643	1.6332	1.0718	1.1598		1.6249	0.91721	0.74942	0.58745	1.6175
6.2014	3.6409	2.8613	1.6146	1.2892		2.8332	1.9257	1.6545	1.1912	0.95203		2.9087	2.0908	1.8503	1.3445	1.058
6.2941	3.3576	2.6072	1.6954	1.5669		3.044	1.8954	1.6031	1.2508	1.1649		3.5479	2.3914	2.0587	1.4287	1.2331
6.6263	3.5696	2.7577	1.857	1.7723		3.4059	2.1426	1.7892	1.3703	1.3148		2.8901	1.8398	1.5312	1.1761	1.9568
5.7048	2.4477	1.6324	0.66568	0.58039		2.459	1.3078	0.96701	0.49077	0.42849		1.1225	0.48391	0.37931	0.33554	0.66109
5.4016	2.626	1.9984	1.3722	1.3594		2.3671	1.6853	1.4565	1.1253	1.1602		1.506	1.1726	1.1024	1.0839	0.73256
5.1104	2.3854	1.7781	1.2107	1.2395		2.0551	1.4322	1.2367	0.97448	0.97299		1.5058	1.1393	1.0181	0.83125	1.4021
4.5834	2.0868	1.5155	1.0492	1.0905		1.4317	1.0836	0.95318	0.82916	0.89684		1.1788	1.0826	1.0727	1.0839	1.1665
5.6241	2.4275	1.7397	1.2107	1.3277		1.7024	1.223	1.078	0.97448	1.0478		1.3493	1.0176	0.9302	0.93038	1.0612
6.8485	3.0235	2.2283	1.5338	1.4743		2.4494	1.7276	1.5216	1.2819	1.2797		1.9497	1.3856	1.2625	1.1895	1.2603
5.2576	2.5688	1.9261	1.3116	1.246		1.7194	1.3812	1.2542	1.0681	1.04		1.7432	1.3967	1.2895	1.1364	0.71191
6.3976	2.8729	2.0752	1.352	1.1933		1.9081	1.49	1.325	1.1061	1.0213		1.6866	1.5015	1.4181	1.1364	1.1627
3.9696	1.4145	1.04	0.86749	0.9958		1.293	0.78834	0.6839	0.67188	0.8414		1.308	0.86441	0.73492	0.64024	0.72406
6.2322	2.0294	1.2824	0.82713	0.53257		1.6295	1.1303	0.95641	0.85672	0.54986		2.0209	1.2992	1.0597	0.9113	0.71668
5.1031	1.903	1.3131	0.90786	0.82793		1.6777	1.1835	1.027	0.9411	0.85787		2.6818	1.888	1.5297	1.053	0.89973
6.5247	2.0413	1.3162	0.78676	0.74694		1.6443	1.1458	0.98519	0.81458	0.76139		1.4001	0.94544	0.79658	0.6291	0.47768
6.2906	2.2195	1.4285	0.84731	0.94305		1.3785	1.0527	0.9496	0.8778	0.98382		1.4158	1.0353	0.91619	0.77	1.0214
6.4882	2.2393	1.4609	0.92804	1.0942		1.447	1.1024	0.99604	0.96222	1.1532		1.1243	0.86471	0.81272	0.9113	1.4554
5.8126	2.1324	1.4479	0.90786	1.0446		1.7489	1.2899	1.1184	0.9411	1.0711		1.4172	1.1743	1.0461	0.9113	1.1147
5.3125	1.91	1.303	0.86749	1.0031		1.8653	1.3084	1.093	0.89889	1.042		2.0306	1.579	1.3072	0.9821	1.4729
5.1856	1.9158	1.2989	0.78676	0.68787		1.509	1.0643	0.93585	0.81458	0.7039		0.81741	0.66553	0.62939	0.6291	0.88729
7.2942	2.3833	1.4786	0.82713	0.5769		1.8271	1.2542	1.049	0.85672	0.58687		1.7676	1.3624	1.2121	0.9821	0.75726
6.3182	2.2554	1.4389	0.76658	0.73677		1.5109	1.1652	1.0074	0.79352	0.75154		1.5902	1.4396	1.3138	0.9113	0.81501
5.1989	2.1406	1.4624	0.80694	0.72122		1.5475	1.1808	1.0384	0.83564	0.7546		1.5645	1.1522	1.0076	0.9113	0.81199
5.0463	2.1384	1.5093	0.92804	1.1163		1.4213	1.1564	1.0687	0.96222	1.1455		1.473	1.2524	1.1635	1.053	1.475
4.7565	2.0685	1.4038	0.76658	0.72269		1.1332	0.99312	0.921	0.79352	0.73062		0.97557	0.90648	0.86791	0.77	0.6526
5.8289	2.4717	1.6566	0.84731	0.78913		1.5456	1.2343	1.098	0.8778	0.82067		1.8811	1.5197	1.4142	1.1951	0.43545
6.2763	2.4031	1.6229	0.94823	0.84043		1.549	1.2519	1.1364	0.98335	0.853		1.3366	1.1569	1.0368	0.8406	1.4823
6.4136	2.6066	1.6954	0.84731	0.86743		1.4054	1.1605	1.0523	0.8778	0.90625		0.98318	0.89312	0.83456	0.6995	1.4056
5.7324	2.3378	1.5513	0.82713	0.9818		1.3193	1.1101	1.0143	0.85672	1.026		1.6825	1.4757	1.3815	1.124	0.59411
6.8863	2.6782	1.6769	0.78676	0.81482		1.2246	1.0456	0.96563	0.81458	0.83752		1.24	1.0856	0.98979	0.6995	0.61141
7.7855	2.8482	1.8595	1.1097	0.99043		1.5583	1.2995	1.2177	1.1527	1.035		1.4564	1.2027	1.0539	0.8406	0.27331
8.8546	2.8981	1.7525	0.94823	0.7586		1.6858	1.3491	1.1772	0.98335	0.78255		2.1421	1.6981	1.453	1.124	0.76076
8.805	3.1212	1.9515	0.94823	0.94457		1.7958	1.3774	1.2179	0.98335	0.97795		1.6319	1.3205	1.1839	0.8406	0.55703
9.9944	3.3131	1.9275	0.82713	0.91488		1.5654	1.2548	1.095	0.85672	0.94581		1.4613	1.1665	1.0174	0.8406	1.1966
9.0525	2.933	1.7612	0.88768	1.0335		1.7985	1.3126	1.1212	0.91999	1.0639		1.8676	1.3899	1.1776	0.8406	1.2047
9.8279	3.2606	1.8976	0.82713	0.64912		1.601	1.2402	1.08	0.85672	0.67225		1.3711	1.1539	1.0399	0.8406	0.936
9.242	3.3124	1.9962	0.86749	0.67569		1.7663	1.3907	1.2031	0.89889	0.69568		1.4468	1.2543	1.1412	0.8406	0.74844
7.8208	2.8699	1.8744	0.9886	0.93259		1.7306	1.3654	1.2359	1.0256	0.97501		1.302	1.131	1.0167	0.77	0.58946
7.8564	2.8156	1.7825	1.0088	1.1885		1.6777	1.3406	1.191	1.0468	1.2388		1.7842	1.5631	1.4231	1.1951	0.60861
6.7293	2.5125	1.6876	1.0088	0.96086		1.7055	1.3223	1.1808	1.0468	0.98014		1.5449	1.3459	1.2689	1.1951	0.83055
15.005	4.6774	2.4865	0.92804	1.0489		2.0845	1.6067	1.3425	0.96222	1.0789		2.5701	2.1849	1.9454	1.3376	0.91359
6.9506	2.6705	1.7443	0.90786	0.80442		1.5688	1.2517	1.1221	0.9411	0.83594		1.6922	1.4301	1.3209	1.053	1.0254
7.2618	2.615	1.6653	0.86749	0.98771		1.7219	1.3039	1.131	0.89889	1.0367		2.3622	1.7267	1.4918	1.1951	1.3946
9.0948	3.0502	1.8623	0.94823	0.90506		1.6603	1.3369	1.1793	0.98335	0.93604		1.7139	1.4231	1.2494	0.9113	0.6829
6.7565	2.4215	1.5723	0.84731	1.2049		1.32	1.0835	0.99786	0.8778	1.2105		1.0119	0.88036	0.83422	0.77	0.11762
7.7904	2.702	1.6212	0.70604	0.71983		1.2137	1.0431	0.94978	0.73041	0.74824		0.75934	0.62782	0.53881	0.34851	0.87399
7.1578	2.6395	1.6737	0.86749	0.88624		1.4413	1.1839	1.0674	0.89889	0.92939		1.2153	0.96329	0.87896	0.8406	0.70496
5.2704	2.0734	1.4083	0.82713	0.8134		1.1325	0.98064	0.92848	0.85672	0.85439		0.77918	0.70126	0.67699	0.6291	0.89984
5.2805	2.2843	1.6154	0.9886	1.0008		1.4122	1.1987	1.1225	1.0256	1.0282		1.2674	1.1552	1.1216	1.053	1.0013
4.1703	1.904	1.3612	0.80694	0.82992		1.276	1.0551	0.95922	0.83564	0.86156		1.3151	1.2203	1.195	1.124	0.64513
6.5445	2.5305	1.6676	0.86749	0.93751		1.6332	1.2766	1.1328	0.89889	0.97253		0.60814	0.50508	0.4717	0.4886	0.8302
5.6371	2.3149	1.575	0.78676	0.79528		1.5012	1.192	1.0664	0.81458	0.82564		0.94898	0.70492	0.6283	0.4886	0.98603
8.2187	2.65	1.5966	0.76658	0.80859		1.5541	1.1785	1.018	0.79352	0.82599		0.78259	0.61678	0.54132	0.4886	1.1311
10.34	3.3682	1.9241	0.84731	1.0372		1.6108	1.2441	1.084	0.8778	1.0842		1.3379	1.1064	1.0009	0.9113	1.3291
9.8394	3.0159	1.7598	0.92804	0.94904		2.4748	1.5795	1.2383	0.96222	0.97362		2.4391	1.8407	1.4699	1.053	0.4271
8.425	2.7645	1.6917	0.96841	0.81123		1.8483	1.3581	1.1584	1.0045	0.84109		1.9819	1.6006	1.3962	1.053	0.50619
9.5513	3.0615	1.8369	0.88768	0.70762		1.7679	1.3452	1.1711	0.91999	0.74214		1.4946	1.1543	0.9625	0.6291	0.61724
9.1639	3.0465	1.841	1.0088	0.96046		2.3433	1.5985	1.2967	1.0468	0.98823		2.0314	1.6827	1.4926	1.1951	1.1122
10.543	3.2665	1.8333	0.78676	0.77331		1.5479	1.2337	1.0807	0.81458	0.81426		1.452	1.2098	1.0545	0.6995	0.66338
5.2963	2.2318	1.6353	1.1501	1.2318		2.2055	1.5533	1.3547	1.1951	1.2719		2.778	1.9289	1.6476	1.5522	1.0081
6.7571	2.4468	1.6489	0.96841	0.99731		2.0592	1.4752	1.2737	1.0045	1.0179		1.1259	0.66717	0.49843	0.34851	1.3434
8.9604	2.6699	1.6726	0.92804	0.91878		2.6248	1.7679	1.4153	0.96222	0.9448		1.9664	1.0703	0.74762	0.4886	1.0056
11.437	3.8996	2.2744	1.0088	1.2477		2.0058	1.5287	1.3114	1.0468	1.2904		2.1708	1.7195	1.473	1.124	1.0851
7.0482	2.7974	1.913	1.2309	1.2271		1.9175	1.4431	1.319	1.2801	1.2814		1.7757	1.4172	1.3757	1.6957	1.6264
11.648	3.3329	1.9017	1.029	0.98699		2.3694	1.6615	1.3535	1.0679	1.0142		1.3832	1.1063	0.93062	0.6291	0.90666
10.056	3.0052	1.768	0.96841	1.2097		2.328	1.609	1.3024	1.0045	1.2462		1.9323	1.4819	1.294	1.053	0.80611
6.8943	2.5409	1.68	0.96841	0.84333		1.7165	1.3259	1.1872	1.0045	0.8664		0.76728	0.58367	0.50192	0.4886	0.83012
7.2365	2.5939	1.7379	1.0693	1.2244		2.0026	1.4992	1.3188	1.1103	1.2624		2.385	1.8321	1.4728	0.9821	0.70377
7.3755	2.7603	1.8424	0.9886	0.9165		1.9113	1.4593	1.2895	1.0256	0.94812		0.99377	0.82554	0.78163	0.6995	1.2767
5.4583	2.23	1.5525	0.86749	1.0195		1.7003	1.3286	1.1701	0.89889	1.0611		0.5034	0.45816	0.42564	0.34851	1.6603
7.6377	2.9608	1.9732	0.9886	0.81142		2.3481	1.5862	1.3481	1.0256	0.84546		2.6021	1.4292	1.1467	0.9113	1.2257
3.9565	2.0618	1.5648	0.90786	0.7338		1.6941	1.3568	1.2123	0.9411	0.75797		1.355	1.1956	1.1239	0.9821	0.34817
6.0604	2.6067	1.8461	1.0693	0.8246		1.8889	1.4786	1.3271	1.1103	0.85196		1.1246	0.94308	0.89841	0.77	0.7004
11.04	3.525	2.0593	0.86749	0.83791		1.7148	1.3512	1.1938	0.89889	0.87459		0.98972	0.7459	0.64649	0.4886	0.65528
7.3773	2.7256	1.7419	0.86749	0.75729		1.6318	1.2809	1.1344	0.89889	0.78844		1.6431	1.3916	1.2583	0.9113	0.79074
7.5316	2.9848	2.0101	1.1905	1.2438		2.3153	1.7098	1.476	1.2376	1.2887		3.139	2.4613	2.2702	2.2741	1.2119
8.6401	3.1474	1.8922	0.7464	1.0439		2.0917	1.4768	1.2	0.77248	1.0931		2.4791	1.8751	1.6526	1.1951	1.2227
10.392	3.6523	2.2699	1.1703	1.3065		2.2384	1.6968	1.4704	1.2163	1.3475		2.1656	1.5874	1.3949	1.1951	1.3212
9.9907	3.6113	2.2458	1.0492	0.85356		1.8931	1.5432	1.3852	1.0891	0.88684		1.037	0.96328	0.91429	0.77	0.85918
6.7624	2.6998	1.8185	1.029	0.83343		1.8076	1.4429	1.2792	1.0679	0.86206		1.5129	1.304	1.2204	1.124	0.79491
14.498	4.0385	2.1052	0.90786	1.0279		2.2634	1.6883	1.3547	0.9411	1.0754		2.1812	1.8404	1.6149	1.053	0.97524
5.867	2.6493	1.8874	1.0492	1.2013		2.0141	1.5707	1.3902	1.0891	1.214		2.1906	1.699	1.5268	1.1951	1.1848
5.6231	2.5321	1.7802	0.9886	0.72346		2.0053	1.5306	1.3306	1.0256	0.75388		1.2722	1.0045	0.89861	0.6995	0.79931
9.6566	3.2509	1.9965	0.94823	0.96067		2.0816	1.5247	1.3061	0.98335	0.99898		2.5422	1.9117	1.6283	1.053	1.0786
6.3192	2.7293	1.8836	0.9886	0.94283		1.7123	1.4022	1.2729	1.0256	0.96861		1.7669	1.5303	1.441	1.2663	1.1314
8.6358	3.2013	2.0112	0.90786	0.895		2.0764	1.5446	1.3133	0.9411	0.92686		2.2801	1.7677	1.4944	0.9821	1.1241
6.5174	2.5566	1.7275	0.9886	1.055		1.766	1.3809	1.222	1.0256	1.102		1.7422	1.4108	1.2807	1.1951	1.4423
6.5129	2.8078	1.94	1.1097	1.2849		2.1559	1.621	1.4214	1.1527	1.3373		3.158	2.3337	2.0305	1.4806	0.71293
7.5061	3.0615	2.0351	1.0895	1.1657		1.9639	1.5663	1.3861	1.1315	1.1846		2.0846	1.8091	1.7082	1.4806	0.84946
7.668	3.137	2.1319	1.1299	1.0685		2.3068	1.745	1.5256	1.1739	1.1267		2.7834	2.0728	1.77	1.1951	1.3551
7.6469	2.7628	1.7719	0.96841	1.1267		2.2341	1.5443	1.2794	1.0045	1.1665		2.5361	1.7487	1.498	1.1951	1.49
7.1023	2.6809	1.8309	1.1097	1.1499		2.5559	1.7753	1.4879	1.1527	1.2031		4.53	2.7586	1.9099	1.1951	1.1443
8.91	3.2711	2.0974	1.0895	1.1468		2.1632	1.6322	1.4176	1.1315	1.199		2.286	1.6974	1.5637	1.4806	1.9512
9.6655	3.2622	1.966	0.86749	0.81344		2.1693	1.5807	1.3176	0.89889	0.84564		1.9243	1.3754	1.1533	0.77	0.89223
7.6309	3.3201	2.291	1.1703	1.1086		2.1964	1.7795	1.595	1.2163	1.15		2.3983	1.9459	1.7413	1.2663	1.4675
6.8997	3.038	2.1844	1.2712	1.4691		2.1442	1.7253	1.5716	1.3226	1.5339		2.23	1.9859	1.8913	1.6239	1.2794
8.1815	3.352	2.2724	1.1905	1.0673		2.2372	1.7992	1.5991	1.2376	1.117		1.5521	1.2094	1.0631	0.77	1.0351
5.1453	2.078	1.3894	0.66568	0.64232		1.792	1.2286	1.0103	0.68838	0.66901		3.3004	1.9555	1.504	0.9821	0.24843
4.1523	1.6804	1.1481	0.62532	0.45362		1.6415	1.1032	0.90331	0.64638	0.47256		1.2441	0.73621	0.60688	0.5588	0.46005
9.9559	3.6526	2.3038	1.3116	1.2188		2.4059	1.7823	1.536	1.3652	1.2396		2.876	2.3456	2.1596	2.2014	1.8811
6.9128	2.8822	1.9565	1.0088	1.1785		1.8527	1.4979	1.3326	1.0468	1.2224		1.8598	1.6185	1.5067	1.2663	1.5308
8.9329	3.2158	2.072	1.1299	1.2166		2.6271	1.8441	1.529	1.1739	1.2525		2.258	1.9212	1.7569	1.4806	1.4343
12.626	4.1358	2.4809	1.2309	1.2216		2.0926	1.6537	1.4805	1.2801	1.2788		2.4073	2.0054	1.7392	1.1951	0.68149
14.252	4.7778	2.6941	1.1501	1.1481		2.2103	1.7868	1.5374	1.1951	1.1838		2.7643	2.4666	2.2748	1.6957	1.2326
8.288	3.0265	1.977	1.1097	1.1228		2.003	1.5717	1.3915	1.1527	1.159		2.0809	1.5609	1.302	1.053	0.65095
5.8678	2.6873	1.9839	1.2511	1.0376		2.4664	1.8647	1.6381	1.3013	1.0627		1.8217	1.3486	1.1787	1.053	0.97412
5.8623	1.8546	1.1535	0.66568	0.73304		1.4378	0.98122	0.82262	0.68838	0.77203		1.5622	0.88663	0.68753	0.5588	0.89901
4.8244	2.4258	1.8847	1.1501	1.1469		1.9014	1.6763	1.5727	1.1951	1.182		0.38293	0.3337	0.33138	0.34851	0.99061
10.54	3.6356	2.2239	1.2107	1.2251		2.2076	1.6991	1.4796	1.2588	1.2881		1.3239	1.2204	1.2066	1.1951	1.1575
6.3738	3.0066	2.1087	1.1703	1.0517		3.5216	2.4241	1.8893	1.2163	1.076		9.5957	5.9223	4.1036	1.8397	0.42058
10.519	4.2534	2.911	1.756	1.7384		2.9404	2.3217	2.0669	1.8359	1.826		2.012	1.9274	1.9768	2.2014	2.1187
6.6557	2.9354	2.0646	1.1703	1.2229		1.4348	1.3107	1.2642	1.2088	1.2417		1.6767	1.6541	1.6016	1.586	1.1492
8.4821	3.4646	2.3087	1.1501	1.2473		1.4187	1.3013	1.2595	1.1875	1.2688		1.8413	1.4201	1.243	0.94149	1.9904
5.3719	2.3833	1.6282	0.82713	0.83075		1.0606	0.96753	0.9215	0.84937	0.84634		0.72159	0.50726	0.42901	0.31053	0.31652
6.9917	2.9024	1.8683	0.88768	0.93275		1.2275	1.1016	1.0195	0.91248	0.95556		0.83977	0.75668	0.68953	0.62434	1.1931
6.743	2.8268	1.8619	0.84731	0.94489		1.1244	1.043	0.98324	0.87039	0.96062		57.424	17.187	4.8015	0.62434	1.2789
7.0426	2.9437	1.9192	0.86749	0.74855		1.2298	1.0921	1.0163	0.89143	0.77654		1.4665	1.0307	0.86087	0.62434	0.27143
5.3104	2.4083	1.629	0.78676	0.66677		1.0656	0.98311	0.92894	0.80737	0.70073		0.24396	0.29815	0.30438	0.31053	0.47868
6.3463	2.8355	1.8957	0.88768	1.0273		1.0801	1.015	0.97408	0.91248	1.0489		0.71132	0.50051	0.41617	0.31053	1.0929
6.9711	2.8496	1.8669	0.90786	0.82554		1.1418	1.0425	0.99207	0.93354	0.83979		2.3771	1.6717	1.4213	1.262	1.5709
6.9649	2.8206	1.8832	0.9886	1.039		1.1975	1.0856	1.0427	1.018	1.0819		2.2851	1.7227	1.6253	1.586	1.425
5.5643	2.3648	1.6138	0.90786	0.8222		1.1811	1.0607	0.99099	0.93354	0.83992		3.5404	3.233	3.0202	2.5792	0.91891
6.1799	2.5543	1.7293	0.88768	1.0026		1.1363	1.0262	0.98349	0.91248	1.0318		0	0	0	0	0.93513
8.2619	3.2829	2.0478	0.82713	0.83732		1.368	1.1922	1.0799	0.84937	0.8764		0.06421	0.23202	0.4041	0.62434	1.3318
7.8226	3.2617	2.1837	1.0088	1.0299		1.3815	1.2395	1.1776	1.0391	1.0735		1.1174	0.98385	0.95959	0.94149	1.3503
7.1188	2.8931	1.9112	1.0088	1.0274		1.421	1.2366	1.1397	1.0391	1.0317		1.4506	1.3544	1.3175	1.262	1.0708
6.8195	2.931	1.9991	1.0088	1.0079		1.2573	1.181	1.14	1.0391	0.99872		0.785	0.68368	0.63745	0.62434	1.4479
7.2112	2.9961	1.9656	0.90786	0.81024		1.2536	1.1317	1.0628	0.93354	0.82383		8.9806	4.5876	3.1719	1.262	0.83152
7.9945	3.3605	2.1899	1.0492	1.228		1.3067	1.2025	1.1348	1.0814	1.2761		2.9808	2.8821	2.7661	2.5792	1.0474
8.4189	3.1796	2.026	0.94823	1.1201		1.4249	1.2251	1.1324	0.97572	1.1407		0	0	0	0	0.99576
7.9122	3.1525	2.0489	1.0088	1.1617		1.2645	1.155	1.0934	1.0391	1.1883		0.35418	0.43996	0.5277	0.62434	0.29087
9.1805	3.6201	2.2832	0.96841	0.90361		1.433	1.2839	1.1835	0.99683	0.90627		0.21399	0.28067	0.29361	0.31053	0.76844
6.9289	2.7625	1.8343	0.92804	1.0944		1.2842	1.1425	1.0749	0.95463	1.1113		1.3471	1.1751	1.0671	0.94149	0.92105
6.727	2.9081	1.9087	0.80694	0.73113		1.0805	1.0004	0.95758	0.82836	0.74355		0	0	0	0	0.71641
8.3095	3.5674	2.3315	1.0895	0.92679		1.4595	1.3097	1.2257	1.1238	0.97789		1.2739	1.1302	1.0569	0.94149	1.0274
10.668	4.1148	2.5448	1.0492	0.94119		1.5504	1.4325	1.3208	1.0814	0.97559		0.45535	0.55391	0.56777	0.62434	0.96192
6.8588	3.0593	2.0671	0.94823	0.87268		1.4464	1.282	1.1901	0.97572	0.86583		1.0548	1.0465	1.0055	0.94149	1.4193
6.9484	2.7014	1.7422	0.68586	0.63055		1.2649	1.1006	0.99208	0.70263	0.63119		0.043024	0.23961	0.28378	0.31053	0.28971
5.784	2.3266	1.5423	0.70604	0.64471		1.1586	1.0153	0.92933	0.72355	0.6576		22.766	3.0216	1.0325	0.31053	1.0562
5.2949	2.1735	1.4554	0.70604	0.82594		1.1135	0.95311	0.8707	0.72355	0.83731		1.6452	1.3219	1.3261	1.262	0.2599
4.9356	2.1058	1.4669	0.80694	0.90747		1.1379	1.0178	0.95536	0.82836	0.92757		2.9253	2.3043	2.0387	1.586	0.41223
6.3983	2.7034	1.8264	0.84731	0.71568		1.1751	1.0622	1.0061	0.87039	0.72306		0.014401	0.37931	0.53285	0.62434	0.53812
5.2198	2.2322	1.5454	0.76658	0.71883		1.3148	1.1305	1.0275	0.78639	0.71912		1.1545	0.90653	0.79253	0.62434	1.2649
6.3512	2.6545	1.7894	0.86749	0.86773		1.3699	1.1983	1.0972	0.89143	0.8651		0.24701	0.3009	0.30811	0.31053	0.9563
6.4891	2.6147	1.726	0.86749	0.63914		1.2721	1.0525	0.96317	0.89143	0.64432		5.7938	2.8153	2.1403	1.586	0.89442
6.5021	2.924	2.0424	1.0088	0.90175		1.2479	1.1703	1.139	1.0391	0.905		0.015556	0.22134	0.27928	0.31053	0.70375
5.995	2.6836	1.9215	1.029	1.1202		1.2337	1.1606	1.1392	1.0603	1.1529		0	0	0	0	1.273
6.3342	2.7829	1.9276	0.94823	0.98071		1.1745	1.1109	1.0866	0.97572	1.0069		0.69921	0.79224	0.84574	0.31053	1.3169
7.9968	3.1691	2.1253	1.0088	1.1234		1.3135	1.1793	1.1392	1.0391	1.1431		0	0	0	0	0.91745
6.3107	2.8021	1.955	1.0895	1.0381		1.3051	1.1913	1.1497	1.1238	1.058		1.711	1.5611	1.5515	1.586	1.1274
7.0042	2.8364	1.9265	1.0895	1.3295		1.3911	1.246	1.1836	1.1238	1.3669		2.2965	2.1142	2.0527	1.9135	0.54466
8.1153	3.2173	2.1155	0.94823	0.87731		1.2729	1.1482	1.0986	0.97572	0.90472		0.20484	0.44213	0.53814	0.62434	0.7642
8.3019	3.2055	2.043	1.0088	1.0993		1.3062	1.1537	1.0755	1.0391	1.1151		1.5823	1.6284	1.5957	1.586	1.1401
6.5121	2.7787	1.8675	0.88768	0.99717		1.2227	1.0787	1.0138	0.91248	1.0271		0.49258	0.77634	0.8611	0.94149	1.2275
6.8464	2.5432	1.6636	0.94823	0.95303		1.188	1.0341	0.9707	0.97572	0.98234		1.3239	1.173	1.085	0.94149	1.228
4.8289	2.3378	1.7218	1.0492	0.8155		1.5458	1.3857	1.2803	1.0814	0.83374		3.6995	3.017	2.8199	2.5792	1.2883
7.897	3.2183	2.1368	0.9886	1.1013		1.7356	1.4542	1.3038	1.018	1.1386		1.8988	1.5341	1.3743	1.262	1.3988
7.8488	3.2099	2.137	0.92804	0.96391		1.668	1.4514	1.3153	0.95463	0.9763		0.5801	0.42732	0.35977	0.31053	1.0505
7.6536	3.2433	2.2162	1.1097	1.2834		1.4687	1.3155	1.2566	1.145	1.2962		5.8928	2.1397	1.4447	0.94149	1.4521
9.7193	3.7179	2.3966	1.0693	1.1829		1.5527	1.355	1.2729	1.1026	1.1698		1.2182	0.86243	0.68729	0.62434	2.6499
13.264	4.93	3.0186	1.2309	1.2587		1.9192	1.6602	1.5129	1.2726	1.2372		1.2428	0.94439	0.79299	0.62434	1.7235
7.7648	3.3179	2.2437	1.1703	1.0702		1.5364	1.3835	1.3065	1.2088	1.1203		1.1528	1.0904	1.0316	0.94149	1.6733
9.2997	3.6323	2.351	1.2309	1.1966		1.5815	1.3941	1.3046	1.2726	1.2275		3.0233	2.5724	2.3432	2.2446	1.5291
8.6189	3.5081	2.3225	1.0492	1.0502		1.8118	1.5428	1.3919	1.0814	1.0687		1.6845	1.3393	1.1607	0.94149	1.3316
7.2927	2.9745	2.0364	1.0693	1.1353		1.6742	1.4699	1.3481	1.1026	1.138		0.96946	0.93609	0.92454	0.94149	0.94425
7.6654	3.2916	2.2521	1.1299	1.1313		1.8003	1.5715	1.4427	1.1663	1.1484		1.0433	0.86535	0.77773	0.62434	1.0326
4.7525	2.0155	1.375	0.72622	0.99329		0.9197	0.8353	0.79176	0.74448	0.99749		0	0	0	0	0.95642
4.0613	1.7593	1.2006	0.60514	0.60302		0.80608	0.73444	0.6929	0.6191	0.61747		0.8573	0.75043	0.70202	0.62434	0.60845
8.3942	3.4561	2.3465	1.2309	1.0378		1.7113	1.5161	1.4256	1.2726	1.0349		2.9903	2.7303	2.5463	2.2446	0.86398
7.2339	3.3892	2.4604	1.5338	1.7871		1.7327	1.6345	1.5865	1.594	1.8379		6.7362	6.6049	6.5569	6.5174	1.7149
10.728	4.2398	2.7495	1.2712	1.2451		1.8643	1.5931	1.472	1.3153	1.2753		2.5851	2.3603	2.2588	2.2446	0.62914
3.7117	1.9438	1.4403	0.90786	1.0359		1.7766	1.3862	1.2389	0.98307	1.1158		2.654	1.9101	1.7084	1.4308	0.87883
4.6092	2.0999	1.4857	0.90786	0.9399		1.9847	1.4675	1.2763	0.98307	1.0239		3.398	2.2207	1.7938	1.3201	1.4466
4.1064	2.0381	1.4556	0.92804	0.7713		1.6393	1.2944	1.1591	1.005	0.82405		2.3836	1.3467	1.1338	0.98862	1.5248
3.8103	1.9587	1.4044	0.80694	0.77759		1.7338	1.2821	1.1322	0.87341	0.83816		0.61229	0.62678	0.60851	0.54815	0.79468
4.0292	1.9066	1.3716	0.92804	1.0183		1.6498	1.2261	1.106	1.005	1.1049		4.4203	2.4563	1.987	1.4308	0.65923
4.8074	2.1797	1.5229	0.78676	0.85056		2.1292	1.4866	1.2714	0.85149	0.92054		0.42821	0.45272	0.48073	0.4383	0.77394
4.4119	2.1655	1.5269	0.86749	0.92245		1.8594	1.4089	1.2275	0.9392	0.99673		2.4583	1.3699	1.0993	0.87834	0.86758
3.4416	1.7797	1.3074	0.84731	0.78861		1.6235	1.218	1.0847	0.91727	0.84838		1.9801	1.3227	1.114	0.87834	1.1402
4.0514	1.9584	1.4028	0.92804	1.1121		1.8059	1.2886	1.1408	1.005	1.2086		2.0358	1.4916	1.3441	1.099	1.2234
3.5378	1.7228	1.2983	0.80694	0.66654		1.5811	1.1756	1.0718	0.87341	0.71639		3.7435	1.8747	1.3911	0.6581	1.3001
3.7722	1.832	1.3214	0.82713	0.81659		1.4105	1.0989	1.006	0.89534	0.87818		2.4472	1.2908	1.0391	0.76817	0.71883
3.475	1.7931	1.2844	0.82713	0.90139		1.4254	1.1253	1.0114	0.89534	0.97057		1.6261	1.1626	1.0194	0.87834	0.55798
5.0489	2.3747	1.666	0.9886	0.9152		2.4733	1.5946	1.3441	1.0709	0.98094		6.3473	2.8218	1.9058	0.87834	0.69074
4.381	2.1496	1.5429	0.84731	1.0888		1.6371	1.2926	1.1843	0.91727	1.1572		0.85897	0.67507	0.53581	0.21893	1.0116
4.3133	2.121	1.5123	0.90786	0.95285		1.8077	1.3296	1.1796	0.98307	1.022		2.0677	1.4607	1.1936	0.87834	1.0485
5.426	2.2774	1.532	0.90786	0.79017		1.906	1.3237	1.1579	0.98307	0.85173		2.4903	1.4502	1.2435	1.2095	0.68049
4.1957	1.9983	1.4359	0.82713	0.72548		1.8087	1.3705	1.2041	0.89534	0.78584		4.2569	2.1655	1.6102	1.099	0.76702
5.7186	2.4095	1.6323	0.94823	0.79396		2.3492	1.5092	1.2737	1.027	0.86229		4.6241	2.5457	1.7936	0.6581	1.1084
3.2584	1.6952	1.2535	0.82713	1.0178		1.5981	1.2069	1.0693	0.89534	1.0935		1.5692	1.1097	0.98236	0.87834	0.83928
3.736	1.8125	1.3126	0.92804	0.96024		1.5488	1.2006	1.0773	1.005	1.0425		1.8462	1.2729	1.187	1.3201	1.1181
2.5614	1.3627	1.057	0.7464	0.65021		1.2559	0.99566	0.92104	0.80767	0.7064		1.398	0.81396	0.64561	0.4383	0.92477
3.4853	1.7787	1.2951	0.88768	0.7889		1.378	1.1095	1.0169	0.96113	0.85595		3.1107	1.9287	1.6159	1.3201	1.3627
3.6795	1.7415	1.2756	0.92804	0.85039		1.6832	1.2503	1.1129	1.005	0.91587		5.3969	2.8614	2.2417	1.7637	0.68762
3.858	1.8561	1.3474	0.84731	0.95162		1.6369	1.2349	1.1081	0.91727	1.0169		2.253	1.0825	0.85406	0.76817	1.3221
4.5588	1.9236	1.3383	0.86749	1.0719		1.7138	1.2292	1.0883	0.9392	1.169		1.1045	0.85511	0.71959	0.54815	1.0361
3.0353	1.754	1.3598	0.92804	0.9256		1.4561	1.2253	1.1465	1.005	0.995		2.5514	1.6995	1.4598	1.099	0.83629
3.7773	1.9322	1.3987	0.94823	0.82875		1.4817	1.2034	1.1004	1.027	0.89484		3.0413	2.2246	1.844	1.4308	1.2929
3.9459	1.864	1.3732	1.0088	1.1605		1.7835	1.3158	1.1824	1.0928	1.2613		3.0901	1.7098	1.3907	1.099	0.96064
3.2622	1.6553	1.2608	0.86749	0.8915		1.8233	1.2869	1.1398	0.9392	0.97638		2.8992	1.6751	1.4179	0.98862	0.96154
4.0639	2.1164	1.522	0.84731	0.97434		1.6174	1.2948	1.1738	0.91727	1.0649		1.6089	1.0622	0.90375	0.6581	1.4501
4.812	2.2009	1.5084	0.84731	1.0149		1.7553	1.3327	1.1721	0.91727	1.0963		2.0718	1.0831	0.90007	0.76817	0.68967
4.6623	2.2589	1.5963	0.90786	0.85913		1.8417	1.4261	1.2694	0.98307	0.91748		1.6866	1.0912	0.92634	0.76817	0.74347
3.7297	2.0567	1.5087	1.0088	1.016		1.9291	1.4351	1.2699	1.0928	1.0917		2.1174	1.4587	1.3189	1.099	0.96985
6.0352	2.6794	1.7985	0.94823	0.92659		2.3837	1.6452	1.398	1.027	1.0152		3.0188	1.7551	1.4445	0.76817	0.65234
4.1389	2.0866	1.5009	0.88768	0.83766		1.7695	1.3786	1.2255	0.96113	0.89542		3.1026	1.809	1.4303	1.099	1.2614
4.7977	2.0605	1.4118	0.88768	0.87087		2.0779	1.4059	1.1936	0.96113	0.94683		1.2492	0.70573	0.59335	0.54815	0.92518
3.1032	1.6491	1.2402	0.78676	0.98269		1.5957	1.2342	1.1044	0.85149	1.0604		2.5846	1.7773	1.5256	0.98862	1.0695
4.6996	2.0343	1.374	0.86749	0.7824		2.3065	1.4403	1.1897	0.9392	0.83854		7.2684	3.952	2.6672	0.76817	0.95369
4.0131	1.9105	1.3537	0.78676	0.85237		1.6448	1.2146	1.0814	0.85149	0.92358		2.4759	1.644	1.4456	1.099	1.0341
3.4589	1.7021	1.2478	0.88768	0.89792		1.6094	1.1819	1.0514	0.96113	0.97161		2.9579	1.4344	1.2316	1.2095	0.56718
3.1309	1.6135	1.188	0.82713	0.72426		1.6085	1.1622	1.0215	0.89534	0.78222		1.0035	0.82495	0.76605	0.6581	0.31663
3.872	1.7012	1.2071	0.84731	0.97972		1.7232	1.1834	1.0266	0.91727	1.0461		5.1728	2.3646	1.8299	1.4308	1.142
3.554	1.6415	1.1886	0.78676	0.79766		1.6028	1.0927	0.96772	0.85149	0.85416		1.05	0.75851	0.6913	0.6581	0.81883
3.1034	1.4593	1.1066	0.88768	0.90185		1.5539	1.0953	0.98704	0.96113	0.97784		1.7641	1.065	0.97288	0.98862	0.93729
4.1988	2.0051	1.4157	0.78676	0.69163		1.708	1.2694	1.1249	0.85149	0.74408		1.5969	0.66321	0.47626	0.32856	1.1844
3.6352	1.7743	1.3136	0.92804	0.90197		1.8282	1.2661	1.1251	1.005	0.97632		3.2755	1.8722	1.5605	1.099	0.8126
4.2611	2.0123	1.4296	0.88768	0.7094		1.5955	1.2301	1.1182	0.96113	0.76498		4.846	2.0258	1.3211	0.54815	0.59946
3.2491	1.5836	1.199	0.84731	0.97066		1.572	1.1555	1.0448	0.91727	1.0518		2.7478	1.4069	1.08	0.76817	0.8858
2.9826	1.5473	1.1955	0.86749	0.88438		1.3535	1.0769	1.0135	0.9392	0.94205		0.3287	0.4907	0.56011	0.76817	0.6752
3.5389	1.7725	1.3073	0.90786	0.94035		1.4326	1.0886	1.0138	0.98307	1.0067		2.394	1.3032	1.0643	0.87834	1.4972
2.9426	1.6725	1.2457	0.7464	0.64689		1.3311	1.08	0.98844	0.80767	0.6984		1.8877	1.4417	1.2546	0.87834	0.47123
4.038	1.8755	1.3521	0.78676	0.57863		1.7571	1.2199	1.077	0.85149	0.62518		0.9508	0.60242	0.50464	0.4383	0.92382
4.262	2.0072	1.4413	0.92804	0.96206		1.6381	1.2255	1.1183	1.005	1.0287		5.3355	2.5888	1.8627	1.099	1.0537
3.5708	1.7119	1.2528	0.82713	0.80499		1.6715	1.2078	1.0678	0.89534	0.87225		1.514	0.93785	0.81022	0.6581	0.49048
2.7054	1.5906	1.2267	0.82713	0.81328		1.4259	1.1372	1.0337	0.89534	0.87447		2.2648	1.5139	1.2707	0.76817	0.69805
4.3021	2.0102	1.4132	0.86749	0.97569		1.7679	1.2849	1.1269	0.9392	1.0614		3.4201	1.9761	1.595	1.099	0.58494
3.5697	1.7753	1.3271	0.90786	0.95802		1.7265	1.2577	1.1269	0.98307	1.0348		2.615	1.6211	1.3373	0.87834	0.76548
3.2555	1.6172	1.2123	0.84731	1.1733		1.7248	1.2318	1.0823	0.91727	1.2724		1.1287	1.0163	0.95989	0.76817	1.2515
3.7281	1.7425	1.2679	0.90786	0.79119		1.5076	1.1645	1.0571	0.98307	0.86079		3.1199	1.8396	1.526	1.099	0.9057
4.5226	2.1696	1.4874	0.80694	0.65687		1.6995	1.2973	1.1293	0.87341	0.7043		4.7975	2.1847	1.5465	0.87834	0.58908
3.0897	1.4929	1.125	0.78676	0.79296		1.5891	1.1046	0.98569	0.85149	0.84516		1.969	1.2493	1.0821	0.76817	0.80096
3.0899	1.5895	1.2088	0.84731	0.9145		1.2133	1.0045	0.96615	0.91727	0.99263		1.8163	1.145	0.95353	0.6581	1.4626
4.4727	2.0764	1.426	0.82713	0.95535		1.8922	1.3079	1.1221	0.89534	1.0361		2.1567	1.1711	0.8804	0.54815	1.3011
6.4163	2.8728	1.8966	1.0492	1.1872		2.515	1.6979	1.4216	1.1368	1.2796		4.1527	2.3441	1.7994	1.2095	1.283
4.9083	2.5219	1.7687	0.9886	1.0797		1.8442	1.4783	1.3245	1.0709	1.1772		4.6246	2.1258	1.5657	1.099	1.1656
4.8331	2.114	1.5442	1.1097	1.1534		2.3129	1.5764	1.381	1.2027	1.2444		2.4576	1.7443	1.5278	1.2095	0.9794
5.0986	2.4176	1.7291	1.0693	0.96761		2.069	1.5504	1.3884	1.1588	1.039		2.4013	1.787	1.5336	1.3201	0.93539
3.7658	1.9301	1.4543	0.94823	0.89504		1.9256	1.42	1.2675	1.027	0.98793		2.1524	1.332	1.0987	0.76817	1.2193
3.6833	1.8408	1.3855	0.92804	1.02		1.8433	1.3701	1.2239	1.005	1.1044		3.5165	2.0054	1.6675	1.3201	1.2643
3.4027	1.8615	1.4607	1.029	1.01		1.671	1.3393	1.2549	1.1148	1.082		0.8746	1.0505	1.075	0.98862	0.72111
4.4103	2.1081	1.5436	1.0492	1.4403		1.8263	1.3657	1.2453	1.1368	1.5609		1.2047	1.1021	1.0659	1.099	1.6959
4.4905	2.2037	1.5901	0.96841	1.1232		1.6769	1.3243	1.2142	1.0489	1.2056		2.658	1.7256	1.5245	1.3201	0.93625
3.3762	1.8416	1.4005	0.96841	0.8891		1.625	1.2792	1.1704	1.0489	0.94611		2.1532	1.5961	1.4179	1.099	0.73788
4.1695	2.1123	1.4973	0.84731	0.8668		1.8454	1.4193	1.2325	0.91727	0.92885		2.5735	1.4162	1.1333	0.87834	1.131
3.3124	1.816	1.4077	0.9886	0.87866		1.8601	1.4228	1.2828	1.0709	0.94974		2.3154	1.7651	1.5683	1.099	0.9306
4.6259	2.2905	1.6739	1.0895	1.398		2.0568	1.5358	1.3765	1.1807	1.5035		2.4319	1.781	1.6174	1.4308	1.3115
4.5507	2.1673	1.5969	1.0895	0.96808		2.0195	1.4744	1.3268	1.1807	1.0361		2.7943	1.8288	1.6076	1.3201	1.2125
4.4538	2.1506	1.551	0.9886	1.1019		1.9643	1.4569	1.2848	1.0709	1.1941		2.3334	1.6654	1.4403	1.099	1.4293
3.5229	1.8744	1.4013	0.90786	0.61399		1.584	1.2587	1.1543	0.98307	0.66036		1.2646	0.85016	0.75442	0.76817	0.27876
4.1659	2.1858	1.6154	1.0088	0.89436		1.7989	1.4609	1.3279	1.0928	0.96076		2.489	1.7479	1.5197	1.2095	0.8811
4.9387	2.234	1.5559	0.88768	0.82073		1.8888	1.4076	1.2443	0.96113	0.88122		3.1836	1.5796	1.1706	0.76817	0.41573
3.9324	1.9617	1.4776	1.029	1.1125		2.0522	1.517	1.3462	1.1148	1.1957		3.2642	2.0396	1.7882	1.6526	1.6553
3.598	2.0286	1.5372	0.94823	0.97088		1.6361	1.3335	1.2375	1.027	1.0414		1.4822	1.0764	0.93499	0.6581	0.50344
4.0802	1.8979	1.3772	0.90786	0.80057		1.7891	1.2856	1.1467	0.98307	0.85456		2.6988	1.6578	1.4836	1.3201	0.67286
2.1679	1.3575	1.0786	0.80694	0.94888		1.0731	0.95068	0.90916	0.87341	1.0272		1.4083	1.429	1.3644	1.099	0.2511
2.9103	1.5046	1.1418	0.78676	0.83463		1.4806	1.0854	0.97967	0.85149	0.90247		1.9772	1.3011	1.0929	0.76817	0.8835
4.3711	2.2099	1.5682	0.94823	0.89503		1.8581	1.4097	1.2483	1.027	0.96867		2.4752	1.5824	1.3383	0.98862	1.3048
4.4925	1.965	1.3711	0.88768	1.0429		2.0256	1.3384	1.1402	0.96113	1.1185		1.3675	0.75086	0.64804	0.6581	1.0226
3.5803	1.8453	1.355	0.90786	0.79527		1.5452	1.1877	1.0796	0.98307	0.84818		5.0392	2.4847	1.852	1.3201	0.75672
3.6488	1.7674	1.2399	0.72622	0.99278		1.4921	1.1001	0.96457	0.78576	1.0717		2.1708	1.3276	1.0961	0.87834	1.2317
3.4113	1.6737	1.203	0.80694	0.79028		1.38	1.0453	0.94382	0.87341	0.84958		1.7483	1.2568	1.119	0.98862	0.80645
4.5631	2.1512	1.5547	0.96841	0.71754		2.195	1.5832	1.3745	1.0489	0.77061		2.8943	1.7298	1.4426	1.099	1.0138
2.8719	1.3748	1.0368	0.80694	0.76667		1.4869	1.0223	0.91202	0.87341	0.82898		4.2754	2.1474	1.6476	1.099	0.82013
2.985	1.4979	1.1079	0.76658	0.64098		1.3963	1.0622	0.952	0.82958	0.6922		0.7163	0.88642	0.93061	0.87834	0.62976
4.4485	1.9713	1.3506	0.78676	0.91939		1.7998	1.2143	1.0492	0.85149	0.99667		3.6786	2.1018	1.5695	0.76817	1.1061
3.4278	1.6047	1.0892	0.62532	0.47483		1.368	0.97905	0.84245	0.6763	0.51277		3.0958	1.6543	1.2612	0.87834	0.34906
3.6548	1.5619	1.1123	0.70604	0.68634		1.6774	1.0873	0.94005	0.76386	0.74271		3.8925	1.522	1.1166	0.76817	0.51659
2.7828	1.3406	0.98567	0.72622	0.576		1.2855	0.92103	0.82553	0.78576	0.6281		2.9209	1.6161	1.3155	1.099	0.85554
4.6737	1.968	1.3031	0.72622	0.73268		2.1994	1.3598	1.0942	0.78576	0.78263		3.6994	2.1212	1.6262	0.76817	0.79591
3.9071	1.7565	1.209	0.68586	0.72932		2.2424	1.3915	1.1111	0.74196	0.7876		7.3198	4.0861	2.7539	0.87834	0.83292
3.6995	1.746	1.235	0.7464	0.73873		1.9133	1.2767	1.072	0.80767	0.80315		5.9594	2.3581	1.5812	0.76817	0.43108
3.8594	1.7645	1.2963	0.86749	0.84798		1.8891	1.3139	1.1509	0.9392	0.91893		2.9754	1.7416	1.3875	0.98862	0.71397
3.6061	1.7413	1.3143	0.94823	0.98865		1.6898	1.2379	1.1317	1.027	1.0704		3.9531	2.0984	1.6516	1.4308	0.66492
3.8408	1.9304	1.4128	0.94823	1.0957		1.7442	1.3001	1.1676	1.027	1.1899		1.6384	1.1625	1.0558	0.87834	1.2781
3.9046	2.0451	1.537	1.0492	1.0242		1.7921	1.3631	1.2469	1.1368	1.1053		2.7777	1.8818	1.5736	0.98862	1.3784
4.2372	1.9302	1.391	0.9886	1.0388		1.7133	1.2528	1.1317	1.0709	1.1251		1.6969	1.2608	1.1559	1.099	1.4542
4.4123	2.069	1.4348	0.92804	1.148		1.8164	1.2896	1.1255	1.005	1.2446		3.4779	1.7237	1.4127	1.2095	1.2239
3.8904	1.9514	1.389	0.86749	0.90647		1.6122	1.2338	1.1008	0.9392	0.97811		2.03	1.3153	1.1578	0.98862	1.1613
4.0375	2.0444	1.4714	0.92804	1.0062		1.9128	1.4386	1.2581	1.005	1.0999		2.4086	1.5718	1.3653	0.98862	0.0024307
3.905	1.9676	1.461	0.96841	1.1222		1.7853	1.3554	1.2244	1.0489	1.215		2.4317	1.8571	1.6271	1.2095	1.4387
3.8053	1.8761	1.3862	0.92804	0.79518		1.7868	1.3122	1.1743	1.005	0.85644		1.8389	1.3262	1.1611	0.87834	0.76809
3.6072	1.9618	1.4747	0.92804	0.82406		1.6905	1.364	1.2393	1.005	0.88919		2.451	1.8249	1.6041	1.099	0.4363
3.2352	1.8268	1.425	1.0088	1.156		1.7636	1.3966	1.2741	1.0928	1.2474		3.6812	2.5673	2.187	1.5417	1.0164
5.5868	2.4317	1.6635	1.029	0.87976		2.0802	1.478	1.2956	1.1148	0.95053		3.9699	2.0517	1.6378	1.2095	1.1296
4.7139	2.1912	1.5637	0.94823	0.89055		1.8525	1.3722	1.236	1.027	0.95535		1.3262	0.83496	0.70073	0.54815	0.47445
3.269	1.7258	1.3219	1.0088	1.1836		1.8657	1.3754	1.2194	1.0928	1.289		3.3343	1.9924	1.5905	1.099	1.2233
4.0286	1.9148	1.4135	0.96841	0.61263		1.8399	1.3006	1.1726	1.0489	0.65717		1.573	1.1073	0.99414	0.87834	1.6203
5.0542	2.2013	1.5501	1.0088	1.1893		1.9832	1.3837	1.2326	1.0928	1.2845		3.3227	1.4632	1.0231	0.76817	1.3507
3.2229	1.3958	0.99688	0.70604	0.77521		1.5806	0.99366	0.85451	0.76386	0.83333		1.3621	0.73461	0.64321	0.54815	0.75333
3.2718	1.557	1.1159	0.78676	0.6854		1.5999	1.094	0.94604	0.85149	0.73722		5.082	2.8693	2.2794	1.3201	1.0073
3.6258	1.683	1.1865	0.80694	0.8719		1.9093	1.2128	1.0146	0.87341	0.94951		2.4758	1.5521	1.2633	0.87834	1.3147
3.8012	1.6368	1.1177	0.70604	0.62243		1.4616	0.99349	0.86828	0.76386	0.6663		5.1017	2.3762	1.586	0.76817	0.5319
4.1522	1.8701	1.2907	0.7464	0.63373		2.2197	1.401	1.1304	0.80767	0.68675		3.5972	2.1037	1.5945	0.6581	0.85896
3.138	1.5999	1.1587	0.7464	0.76366		1.4933	1.0873	0.95055	0.80767	0.82327		1.6363	1.2592	1.1432	0.98862	0.92902
4.3139	1.7854	1.2032	0.76658	0.73496		1.9439	1.1982	0.98789	0.82958	0.79898		2.5071	1.3737	1.1146	0.87834	0.78408
3.2154	1.5791	1.1865	0.92804	0.86862		1.8067	1.2404	1.0864	1.005	0.94406		3.875	1.9525	1.5921	1.4308	1.2019
3.3938	1.6149	1.1732	0.80694	0.71169		1.8751	1.2283	1.0409	0.87341	0.7749		1.3018	0.92865	0.846	0.76817	0.3763
3.7935	1.6835	1.1807	0.80694	0.75651		1.7994	1.1917	1.0049	0.87341	0.81366		2.671	1.5372	1.2272	0.87834	0.87667
4.4035	1.9221	1.3194	0.84731	0.90307		1.7712	1.2568	1.079	0.91727	0.96026		27.366	14.874	6.5004	1.2095	0.67752
3.4692	1.7118	1.2806	0.76658	0.59312		1.5747	1.2218	1.1037	0.82958	0.6462		3.4488	2.4367	1.832	0.76817	0.53606
4.6846	2.1196	1.4385	0.86749	0.72043		2.3676	1.4371	1.1684	0.9392	0.77518		2.8695	1.7997	1.4943	0.98862	0.89183
4.688	2.2117	1.5903	1.0492	0.91468		1.8694	1.4617	1.3171	1.1368	0.98503		2.5294	1.6918	1.4102	0.98862	0.82604
5.7868	2.4968	1.7104	0.96841	0.82874		2.2089	1.6077	1.3884	1.0489	0.89851		2.8213	1.2526	0.86765	0.54815	0.76176
6.1573	2.767	1.861	1.029	0.87458		2.3424	1.7291	1.475	1.1148	0.95655		4.3149	2.5983	2.0366	1.3201	0.64267
3.6718	1.8884	1.4436	0.90786	0.7747		1.8532	1.4079	1.2763	0.98307	0.82547		2.4066	1.5178	1.3208	0.98862	0.48733
3.0103	1.6212	1.213	0.84731	0.90527		1.4707	1.1234	1.0066	0.91727	0.96595		2.106	1.5585	1.3752	0.98862	1.1585
3.0696	1.7019	1.3343	0.96841	0.95751		1.6961	1.3157	1.2042	1.0489	1.0191		2.6002	2.068	1.9675	1.7637	1.4724
3.0121	1.6027	1.2193	0.80694	0.71603		1.6214	1.2359	1.1064	0.87341	0.77191		1.579	0.96411	0.80559	0.6581	0.93804
3.3277	1.8317	1.4086	1.0088	1.0526		1.5959	1.2944	1.1996	1.0928	1.1319		2.8075	2.1052	1.8817	1.4308	1.0788
5.9305	2.7695	1.8383	1.0088	0.9177		2.2775	1.6222	1.3732	1.0928	0.98094		2.3486	1.6415	1.3979	0.98862	0.62177
4.6286	2.2813	1.5735	0.88768	0.71534		2.0047	1.4447	1.2352	0.96113	0.77216		1.5933	1.0356	0.8477	0.54815	1.6745
5.5057	2.3667	1.5473	0.94823	0.98833		1.7174	1.3229	1.1586	1.027	1.0601		6.8385	3.1779	2.1134	1.5417	1.58
4.4024	2.0777	1.505	0.92804	0.72736		1.8961	1.3925	1.2433	1.005	0.78881		1.659	1.0862	0.93519	0.76817	0.74943
4.7071	2.2303	1.4985	0.88768	1.1946		1.8417	1.3247	1.1355	0.96113	1.2949		2.6234	1.6905	1.4618	1.2095	1.2479
4.6443	2.3519	1.6505	0.96841	0.84443		1.9656	1.4834	1.2965	1.0489	0.9065		1.7721	1.3797	1.2235	0.98862	1.0791
2.9143	1.4541	1.0897	0.68586	0.56401		1.3555	1.0189	0.92957	0.74196	0.60266		0.76284	0.58106	0.5225	0.4383	0.71934
4.9296	2.0957	1.4203	0.88768	1.3146		2.8303	1.6484	1.3085	0.96113	1.4224		7.4553	4.0336	2.8328	0.98862	1.8084
3.9561	1.8397	1.2986	0.84731	0.89842		1.7189	1.2152	1.0629	0.91727	0.95809		3.4567	1.4117	1.0118	0.76817	0.088488
5.896	2.4652	1.6617	0.92804	0.79027		2.3532	1.5649	1.3315	1.005	0.85408		10.117	4.4597	3.0027	1.099	1.0529
4.752	2.1244	1.4938	0.88768	0.75774		1.7649	1.324	1.1866	0.96113	0.82435		2.9434	1.2409	0.92148	0.87834	0.75256
4.7111	2.1236	1.5001	0.94823	0.80547		2.3284	1.5285	1.2963	1.027	0.87242		2.8298	1.7944	1.619	1.3201	0.9938
4.9569	2.48	1.7146	1.0492	0.97849		2.0299	1.5506	1.3416	1.1368	1.0577		4.8575	2.9987	2.4206	1.5417	0.87602
4.2958	2.2363	1.6781	1.0693	1.4739		2.3894	1.6954	1.4857	1.1588	1.5892		2.4055	1.7426	1.5129	0.98862	1.862
4.4301	2.2458	1.6626	1.1097	0.9313		2.3374	1.6878	1.4706	1.2027	0.99694		3.5835	2.3885	2.0357	1.3201	0.78826
4.7687	2.311	1.707	1.1501	1.1545		2.2906	1.7065	1.5135	1.2467	1.2498		2.8898	2.2671	2.0646	1.6526	0.53995
3.4677	1.6623	1.1872	0.72622	0.76055		1.4053	1.0486	0.94013	0.78576	0.82872		2.0614	1.2394	1.0365	0.87834	0.72436
3.6078	1.7511	1.2732	0.7464	0.68293		1.5027	1.1565	1.043	0.80767	0.74336		1.8101	1.1282	0.86445	0.6581	0.58005
4.6813	1.9325	1.3289	0.90786	0.8159		2.2418	1.3488	1.1181	0.98307	0.88473		2.2894	1.1781	1.0242	0.98862	0.78759
5.2767	2.1236	1.3811	0.7464	0.83056		2.5797	1.5032	1.172	0.80767	0.88672		1.2987	0.54188	0.4397	0.4383	1.1876
3.4388	1.9431	1.4664	0.96841	0.86233		1.876	1.492	1.3178	1.0489	0.93593		3.8068	2.8966	2.6024	1.8748	0.79158
2.4958	1.2935	0.94641	0.62532	0.51245		1.0361	0.78177	0.72199	0.6763	0.55292		1.2732	1.0784	0.98808	0.76817	0.54873
5.0764	2.41	1.651	0.76658	0.92802		1.9636	1.4859	1.2867	0.82958	0.99453		0	0	0	0	0.83137
5.2534	2.4545	1.7127	1.0895	1.2451		2.3592	1.6617	1.4252	1.1807	1.3378		3.8283	2.7964	2.4021	1.7637	0.76462
3.7844	1.9166	1.4213	0.90786	1.0196		2.0762	1.4977	1.2983	0.98307	1.1036		3.3678	2.3819	2.0112	1.3201	1.3348
4.4431	1.9993	1.4339	0.84731	0.91083		1.6349	1.2134	1.1172	0.91727	0.98478		2.0723	1.409	1.1669	0.6581	1.0075
4.6233	2.1214	1.5213	1.0693	1.2043		2.2303	1.5203	1.3105	1.1588	1.3061		4.2143	2.7871	2.3244	1.6526	1.1408
4.9083	2.3383	1.6045	1.0088	1.1508		2.1766	1.4672	1.2382	1.0928	1.2458		3.3916	1.942	1.6165	1.099	1.0932
4.1992	2.1266	1.5053	0.80694	0.81267		1.9476	1.4697	1.2624	0.87341	0.87193		2.2153	1.6935	1.485	1.099	1.1196
3.1067	1.7092	1.3023	0.86749	0.82599		1.5938	1.2531	1.1327	0.9392	0.90061		1.6464	1.2319	1.096	0.76817	0.75443
3.9805	1.7494	1.174	0.70604	0.63598		1.7109	1.1401	0.94786	0.76386	0.6877		11.007	4.8612	3.1101	1.2095	0.81474
4.0335	2.1049	1.5574	0.94823	1.1713		1.5656	1.3001	1.2161	1.027	1.2704		1.846	1.2042	1.0656	0.87834	1.0139
3.967	1.8572	1.3965	0.90786	1.1458		1.9149	1.3556	1.2225	0.98307	1.2423		1.5323	0.84486	0.68628	0.6581	1.5559
5.1895	2.4719	1.6762	0.90786	0.96231		1.8451	1.3935	1.2251	0.98307	1.0516		0.97287	0.69194	0.61978	0.54815	0.89483
4.3234	2.2004	1.582	0.94823	0.96278		2.2167	1.5735	1.3521	1.027	1.0341		2.463	1.7347	1.4795	0.98862	1.0567
4.6892	2.2396	1.6329	1.1299	0.9981		2.1185	1.5261	1.3549	1.2247	1.0717		3.151	1.8144	1.5894	1.2095	0.7772
4.8415	2.449	1.759	1.1501	1.083		1.7135	1.4199	1.32	1.2467	1.1637		4.0328	2.3036	1.9242	1.5417	1.2394
4.2116	2.2352	1.663	1.1097	1.1353		1.9939	1.5154	1.365	1.2027	1.2313		2.7761	1.8648	1.6683	1.4308	1.2588
4.8873	2.4792	1.7768	0.9886	1.013		1.9571	1.5351	1.379	1.0709	1.1003		2.6052	1.619	1.3624	0.98862	1.1915
5.2414	2.4147	1.6958	0.9886	0.88781		2.0579	1.5681	1.3853	1.0709	0.9643		1.7677	1.2961	1.1218	0.87834	0.80026
5.1836	2.4087	1.6642	1.1501	1.248		2.2529	1.5498	1.3317	1.2467	1.3555		3.2523	2.4098	2.1237	1.5417	1.8141
4.936	2.0946	1.4307	0.82713	0.75268		2.2676	1.37	1.1397	0.89534	0.80638		5.8186	2.5551	1.6327	0.4383	0.82023
4.5758	2.1401	1.5391	1.0895	0.95851		2.1259	1.4957	1.3081	1.1807	1.041		3.023	1.8131	1.487	1.099	0.92268
5.3409	2.5105	1.7623	1.029	1.1351		2.1188	1.5369	1.3624	1.1148	1.2479		2.3476	1.239	0.96716	0.6581	0.78768
5.3163	2.618	1.8191	1.0492	1.1921		2.1357	1.5745	1.3841	1.1368	1.2875		3.7379	2.0416	1.6256	1.2095	1.1985
5.6282	2.7053	1.8698	0.96841	0.81773		2.1374	1.6259	1.4319	1.0489	0.88185		1.9006	1.1263	0.93686	0.76817	1.3092
5.3818	2.5167	1.7866	1.2309	0.88274		2.3444	1.6875	1.4765	1.3347	0.95876		3.269	2.5741	2.2922	1.7637	1.5011
5.0547	2.2495	1.5348	0.92804	0.65808		2.1913	1.4835	1.2445	1.005	0.70824		2.721	1.8639	1.6832	1.4308	0.90155
5.4521	2.5247	1.7324	0.9886	0.91292		1.9585	1.493	1.3245	1.0709	0.98083		1.4056	0.81962	0.6748	0.54815	1.6367
5.4488	2.6247	1.8398	1.0693	0.9683		2.1032	1.5942	1.4153	1.1588	1.0458		4.1296	2.1906	1.6036	0.98862	0.1687
3.7483	2.1337	1.6327	1.0895	1.1886		1.7167	1.4239	1.3273	1.1807	1.2781		3.1787	2.2657	1.9924	1.4308	1.4174
5.4134	2.2004	1.4877	0.88768	0.7082		3.1662	1.8323	1.4259	0.96113	0.76165		0.46378	0.47247	0.4568	0.4383	0.94015
3.9661	2.1294	1.6082	1.029	1.3861		1.6246	1.3811	1.3032	1.1148	1.4949		1.027	0.80916	0.74304	0.6581	1.7053
5.2641	2.4967	1.7583	1.0895	0.97309		2.0409	1.566	1.3947	1.1807	1.0619		3.1958	1.9049	1.5667	1.3201	0.93234
4.8475	2.2695	1.5879	0.94823	0.95981		2.3318	1.6237	1.3647	1.027	1.0452		3.1917	2.1493	1.8173	1.2095	1.1789
4.5074	2.1338	1.5519	1.0895	1.0413		1.9829	1.423	1.2748	1.1807	1.1171		2.991	1.7688	1.4699	1.099	1.2526
4.1509	2.0885	1.5058	0.86749	0.916		1.826	1.4357	1.2702	0.9392	0.98789		1.4451	0.88677	0.72009	0.54815	0.47994
4.4845	1.9448	1.3271	0.82713	0.97398		2.0363	1.3105	1.0908	0.89534	1.0498		2.2724	1.193	1.0182	0.98862	1.0199
5.6439	2.8111	2.0055	1.1905	1.1689		2.1381	1.7171	1.5657	1.2907	1.2752		6.3326	3.2135	2.4312	1.8748	2.0273
5.7984	2.7564	1.9116	1.1097	1.145		2.0966	1.5802	1.4094	1.2027	1.2598		3.6446	2.2633	1.8084	1.2095	1.9064
5.156	2.5779	1.8116	1.0492	0.85262		2.1718	1.6376	1.4284	1.1368	0.90746		2.8379	2.0408	1.7895	1.4308	0.76083
4.4466	2.2741	1.6089	0.94823	0.67495		1.8497	1.4347	1.2639	1.027	0.73173		1.1794	1.1389	1.1211	0.98862	0.60795
3.8162	2.1103	1.59	1.0492	1.1386		2.1366	1.6071	1.4059	1.1368	1.2318		2.2117	1.6858	1.4875	0.98862	1.3915
4.2257	2.0968	1.5785	0.96841	0.98152		2.3655	1.6353	1.4289	1.0489	1.0738		1.2082	0.83391	0.69176	0.4383	1.0844
5.3804	2.7007	1.8924	0.90786	1.0723		2.0935	1.6836	1.4925	0.98307	1.1638		4.394	2.6287	1.8101	0.87834	0.77052
5.5207	2.6879	1.932	1.1097	1.2162		2.3887	1.8449	1.6292	1.2027	1.3167		1.969	1.4385	1.2538	0.98862	0.68009
4.661	2.2556	1.6627	1.1097	1.078		2.1006	1.5638	1.4094	1.2027	1.1587		1.2	0.90376	0.87496	0.87834	1.1483
5.262	2.5066	1.8121	1.1299	0.99963		2.0923	1.6189	1.4662	1.2247	1.0737		3.7078	2.2043	1.8037	1.3201	1.4526
4.9283	2.2532	1.6596	1.0895	1.2089		2.4736	1.6583	1.4476	1.1807	1.3045		4.4952	2.3018	1.7898	1.099	1.0294
5.5053	2.6518	1.8383	1.1097	1.2184		2.3359	1.7108	1.4795	1.2027	1.3065		5.8008	3.109	2.4393	1.5417	1.4178
4.7695	2.4311	1.7948	1.1299	1.3159		2.3175	1.753	1.5488	1.2247	1.4229		2.0257	1.3101	1.1339	1.099	2.2544
3.352	1.7734	1.3601	0.96841	0.93028		1.9029	1.4181	1.2621	1.0489	0.99638		1.3987	1.1049	1.0039	0.87834	0.27705
5.9767	2.7884	1.9439	1.0693	1.3126		2.3247	1.7224	1.5173	1.1588	1.4175		2.0109	1.2474	0.98473	0.6581	1.4403
5.0897	2.4055	1.7351	1.1905	1.2679		1.9327	1.5147	1.3836	1.2907	1.375		0.96349	1.1203	1.1156	1.2095	1.7803
4.7204	2.3066	1.7315	1.1703	0.82298		2.048	1.5858	1.4586	1.2687	0.88785		3.6134	1.9816	1.6708	1.4308	0.86663
4.512	2.2963	1.6718	1.0895	0.78775		2.1279	1.6168	1.4204	1.1807	0.85411		2.553	1.9294	1.7563	1.3201	0.93911
4.7592	2.2342	1.5993	0.92804	0.96578		1.89	1.4187	1.2767	1.005	1.0446		6.3643	2.7814	1.906	0.98862	0.97823
5.8786	2.3493	1.5578	0.92804	1.0351		2.5213	1.565	1.2802	1.005	1.1318		7.104	2.673	1.7831	0.87834	1.4724
6.1124	2.6879	1.8788	1.2309	1.0839		2.6066	1.8	1.5572	1.3347	1.1877		2.6922	1.8297	1.5808	1.3201	1.0605
4.8549	2.2269	1.558	1.0895	1.1777		2.3559	1.5361	1.2941	1.1807	1.2701		4.6512	2.6783	2.2252	1.6526	1.3292
6.2899	2.7714	1.8917	1.1501	1.2301		2.5721	1.8105	1.5361	1.2467	1.3341		3.1109	1.8717	1.5464	1.099	2.1193
3.823	1.643	1.0916	0.6455	0.87507		2.0009	1.2168	0.9592	0.69818	0.94954		13.866	8.2196	3.9097	0.76817	0.83131
6.2188	2.8429	1.9718	1.1703	1.0915		2.5733	1.944	1.6773	1.2687	1.1776		7.5974	3.984	2.9257	1.6526	1.3967
5.6975	2.7713	1.9298	1.029	1.0377		2.3366	1.8314	1.5923	1.1148	1.1155		1.9921	1.129	0.94361	0.76817	1.1357
3.8706	1.6468	1.0863	0.58497	0.58874		2.7004	1.6696	1.3191	0.85881	0.86338		4.8332	3.175	2.2868	0.7302	0.86761
2.4541	1.175	0.85487	0.58497	0.65958		1.7689	1.2367	1.0661	0.85881	0.9785		3.4063	2.2316	1.652	0.7302	0.99994
2.9845	1.3244	0.89767	0.52444	0.42523		2.2147	1.4001	1.1247	0.76977	0.62478		3.6409	1.9759	1.4511	0.52126	0.3589
2.5472	1.1688	0.8258	0.48409	0.4531		1.8929	1.2669	1.0576	0.71044	0.66987		2.577	1.5871	1.2237	0.6257	0.59969
2.868	1.1319	0.74748	0.40339	0.3289		1.723	1.0649	0.87606	0.59184	0.48136		2.0621	1.0078	0.72241	0.41689	0.58996
1.3423	0.69585	0.5307	0.40339	0.38672		1.5625	0.97164	0.7977	0.59184	0.56746		1.8112	1.2043	0.97605	0.52126	0.27114
3.3417	1.2889	0.81055	0.44374	0.4184		2.0531	1.242	0.96475	0.65113	0.61097		2.5479	1.628	1.1991	0.41689	0.60023
2.2132	0.98747	0.69966	0.50426	0.64806		1.5166	1.0077	0.85952	0.7401	0.9451		5.2527	2.6047	1.7585	0.93938	0.29176
2.2518	1.0383	0.73208	0.46391	0.45744		1.6547	1.1117	0.92901	0.68078	0.67219		4.9547	2.785	2.0264	0.93938	0.50728
2.824	1.192	0.81117	0.50426	0.56565		2.047	1.2469	1.0051	0.7401	0.83755		2.8708	1.7159	1.3251	0.6257	0.50338
4.2215	1.669	1.0585	0.6455	0.68415		2.5321	1.5934	1.2532	0.94789	1.0011		5.6723	3.8187	2.7732	1.2536	0.84767
3.2687	1.3284	0.85184	0.48409	0.62494		2.2732	1.3515	1.0413	0.71044	0.90472		7.3145	3.9344	2.6883	1.0441	0.682
2.6356	1.2036	0.80575	0.48409	0.51168		2.2835	1.4208	1.0889	0.71044	0.74461		4.6516	2.8148	2.1417	0.93938	0.85805
2.3569	1.0319	0.71003	0.40339	0.44939		1.7064	1.1025	0.89689	0.59184	0.65552		2.004	1.03	0.73929	0.41689	0.076559
3.3368	1.2731	0.85673	0.58497	0.59149		2.2197	1.2695	1.0346	0.85881	0.87741		5.8186	2.8838	1.9027	0.93938	0.92611
2.9649	1.2884	0.88391	0.52444	0.41514		2.2932	1.3991	1.119	0.76977	0.60924		5.3554	3.2772	2.3104	0.7302	0.53347
3.2825	1.5315	1.0646	0.68586	0.68293		2.5905	1.6885	1.3662	1.0073	1.0022		6.0772	4.1931	3.0421	1.1488	0.91841
3.4423	1.4994	1.0392	0.58497	0.70176		2.3859	1.5837	1.3069	0.85881	1.0331		5.8552	3.4907	2.3676	0.83476	0.39418
3.4281	1.4577	1.0234	0.60514	0.73477		2.0158	1.3761	1.1951	0.8885	1.0781		2.1373	2.0776	1.5295	0.6257	1.0867
3.6191	1.6858	1.1872	0.68586	0.59067		2.8925	1.8666	1.5189	1.0073	0.86424		3.6378	2.6807	2.1634	0.7302	1.1504
3.5876	1.5914	1.1216	0.72622	0.87464		2.6908	1.6952	1.4037	1.0667	1.2924		4.1411	2.4133	1.6907	0.7302	1.7248
3.5108	1.5848	1.1078	0.66568	0.61307		2.4837	1.6502	1.3717	0.97759	0.89554		4.5747	2.8319	1.9196	0.7302	1.0549
4.173	1.8381	1.2723	0.66568	0.92792		2.7595	1.811	1.5098	0.97759	1.3629		3.611	2.4848	1.6182	0.41689	0.66572
3.2654	1.5404	1.1081	0.66568	0.74164		2.2349	1.5498	1.3361	0.97759	1.0866		2.1871	1.4245	1.0361	0.41689	0.77017
3.2503	1.4969	1.0754	0.70604	0.67979		2.3165	1.5594	1.3354	1.037	0.999		2.2132	1.7385	1.3815	0.52126	0.57702
3.9463	1.702	1.1439	0.6455	0.64202		2.3093	1.5866	1.3328	0.94789	0.94196		3.5332	3.0541	2.3474	0.7302	1.9433
4.1377	1.6625	1.1292	0.70604	0.91999		2.554	1.6038	1.3425	1.037	1.3607		5.3808	2.9359	2.0153	0.83476	1.2005
3.5461	1.5838	1.1154	0.7464	0.71343		2.8836	1.7877	1.4633	1.0965	1.0492		6.4674	3.4936	2.5603	1.2536	0.65661
4.1933	1.9373	1.2957	0.66568	0.62978		2.6465	1.8541	1.5223	0.97759	0.93072		6.0669	4.5411	3.4306	1.1488	0.88458
3.312	1.3766	0.91324	0.48409	0.56772		2.0222	1.2919	1.0653	0.71044	0.83329		0.38891	0.32687	0.23777	0.10413	0.23306
3.8088	1.3997	0.88859	0.42356	0.39133		2.1514	1.3103	1.0373	0.62148	0.5801		2.9979	1.3311	0.7526	0.31257	0.3162
3.106	1.2015	0.77194	0.40339	0.3164		1.6536	1.079	0.88702	0.59184	0.46352		1.0607	0.84842	0.54191	0.20832	0.73204
2.612	1.0931	0.7285	0.40339	0.42496		1.5613	1.0256	0.84595	0.59184	0.62241		1.9579	0.58644	0.30109	0.10413	0.50039
2.5062	1.0611	0.70692	0.40339	0.45599		1.7677	1.0966	0.87146	0.59184	0.67002		3.6045	2.2097	1.6271	0.6257	0.4722
2.2538	1.0214	0.66678	0.42356	0.3289		1.3521	0.95382	0.78406	0.62148	0.47877		2.3748	1.7539	1.3482	0.7302	0.70809
2.7748	1.1413	0.71416	0.44374	0.42927		1.6258	1.0493	0.83613	0.65113	0.6349		4.2908	3.2562	2.4978	1.1488	0.47936
2.6991	1.0758	0.70361	0.44374	0.49019		1.5376	1.0026	0.8264	0.65113	0.71257		3.0639	1.7499	1.2205	0.6257	0.21026
2.7514	1.121	0.6996	0.38321	0.27237		1.6924	1.0637	0.82978	0.5622	0.39632		4.3069	3.2386	2.6003	1.1488	0.19481
2.8816	1.1502	0.70475	0.38321	0.39686		1.6001	1.013	0.79154	0.5622	0.57967		3.9969	3.2705	2.5377	0.83476	0.54313
2.4003	1.1715	0.7755	0.46391	0.41367		1.3454	1.0213	0.87247	0.68078	0.60622		1.5291	1.1878	1.004	0.6257	0.59336
2.8662	1.1515	0.74347	0.48409	0.41981		1.8751	1.1561	0.91439	0.71044	0.6114		4.3861	2.8055	2.04	0.83476	0.35463
1.6451	0.7741	0.53134	0.42356	0.30591		1.2296	0.80126	0.65899	0.62148	0.449		2.6382	1.9672	1.7039	1.1488	0.34905
3.1727	1.4172	0.90143	0.54461	0.52841		2.3555	1.5054	1.1428	0.79945	0.77279		6.3488	4.385	3.5896	1.8838	0.9771
4.5738	2.0703	1.2458	0.48409	0.50089		2.5707	1.7766	1.3598	0.71044	0.7304		6.1416	5.4501	4.5809	1.2536	0.76729
3.3952	1.4235	0.94712	0.62532	0.65428		2.6908	1.5639	1.2203	0.91819	0.95306		6.452	3.2613	2.3671	1.1488	1.2446
2.9792	1.2722	0.8336	0.52444	0.51853		2.3277	1.3753	1.0582	0.76977	0.75568		6.7427	3.4301	2.2751	0.93938	1.3103
2.5862	1.0439	0.68052	0.44374	0.55331		1.7339	1.0487	0.82918	0.65113	0.81439		3.2342	2.0228	1.5678	0.83476	0.81852
2.6701	1.2866	0.93727	0.66568	0.74641		2.2336	1.4738	1.2425	0.97759	1.0877		2.8095	1.601	1.1962	0.7302	1.0337
2.9091	1.408	1.0471	0.6455	0.75593		2.4914	1.656	1.3947	0.94789	1.1112		2.4886	1.6289	1.2237	0.6257	1.4253
2.9625	1.4027	1.0187	0.62532	0.72692		1.9048	1.4027	1.2386	0.91819	1.0548		4.3041	2.8034	2.0391	0.83476	1.5525
3.9353	1.6207	1.089	0.60514	0.69115		2.0208	1.4306	1.2275	0.8885	1.0096		5.9746	4.3008	2.7279	0.93938	1.1437
3.3062	1.3308	0.89685	0.60514	0.39067		2.1859	1.3472	1.099	0.8885	0.57062		3.9638	2.5114	1.795	0.83476	0.44818
2.7222	1.3164	0.95922	0.60514	0.61567		2.1001	1.4334	1.2202	0.8885	0.89767		3.687	2.4292	1.9562	1.0441	1.1183
3.0279	1.2423	0.83749	0.50426	0.58684		2.2952	1.3739	1.0823	0.7401	0.857		2.104	1.1201	0.81036	0.41689	0.93677
2.2589	1.0182	0.70778	0.46391	0.37531		1.7795	1.1521	0.93094	0.68078	0.54683		3.651	2.4224	1.8885	0.7302	0.28173
4.0811	1.5342	0.98039	0.58497	0.63128		2.2464	1.4339	1.1509	0.85881	0.91703		3.5618	2.6579	1.9493	1.0441	0.85009
3.7429	1.4696	0.97649	0.56479	0.53428		2.3338	1.47	1.1886	0.82913	0.77886		2.5797	1.7045	1.3034	0.83476	0.72422
2.6537	1.2189	0.89862	0.66568	0.56018		2.3681	1.5798	1.3167	0.97759	0.81731		2.8484	1.9555	1.7245	1.4634	0.91458
3.0927	1.3198	0.92656	0.6455	0.62178		2.2305	1.4768	1.2209	0.94789	0.91352		2.8812	1.9472	1.5856	1.0441	0.82687
2.7689	1.1455	0.79785	0.58497	0.65262		1.8749	1.1833	0.99792	0.85881	0.95609		4.7347	2.8399	2.2026	1.2536	0.8879
6.3413	2.0529	1.1952	0.58497	0.61684		3.7374	2.0897	1.4939	0.85881	0.91728		6.8507	4.5201	3.2855	1.3585	0.58058
3.6344	1.4141	0.91558	0.54461	0.50289		2.1839	1.3656	1.0993	0.79945	0.73757		4.1159	2.684	2.0334	1.0441	0.87414
3.0072	1.1816	0.797	0.62532	0.657		2.1015	1.2281	0.99722	0.91819	0.96341		4.3327	2.6913	2.1815	1.4634	0.88936
2.8819	1.2693	0.8514	0.56479	0.51504		2.0941	1.3787	1.1034	0.82913	0.75311		4.0068	2.9151	2.4839	1.5684	0.55659
3.022	1.4084	0.97181	0.62532	0.5814		2.1442	1.4864	1.2366	0.91819	0.85948		3.351	2.3337	1.8768	1.0441	1.274
2.7114	1.1565	0.82652	0.60514	0.56511		1.7769	1.1902	1.0325	0.8885	0.82455		4.0824	2.5235	1.9962	1.2536	0.52835
2.9537	1.2999	0.92061	0.62532	0.48384		2.1233	1.4138	1.1892	0.91819	0.71196		2.9948	2.1272	1.8229	1.2536	0.28849
3.8148	1.5226	0.99905	0.68586	0.70233		2.6156	1.5397	1.2184	1.0073	1.0334		5.0845	3.2721	2.5726	1.4634	0.6802
3.2036	1.4103	0.9443	0.68586	0.76017		1.9525	1.345	1.122	1.0073	1.1013		4.0433	3.0122	2.5405	1.7786	1.4622
3.253	1.3147	0.91904	0.6455	0.8104		2.2928	1.4079	1.1797	0.94789	1.1862		2.8765	1.7361	1.3633	0.83476	0.57825
3.1347	1.2953	0.9028	0.62532	0.659		1.9907	1.2958	1.1073	0.91819	0.96262		3.2882	2.0369	1.6087	1.0441	0.62359
3.4213	1.3838	0.96305	0.70604	0.54152		2.2336	1.395	1.1831	1.037	0.79359		3.3501	2.0778	1.6342	1.0441	1.0382
2.6898	1.2564	0.88767	0.58497	0.55241		1.7931	1.2977	1.1121	0.85881	0.80616		2.5906	1.5674	1.1841	0.7302	0.73773
3.8658	1.4961	0.99049	0.6455	0.54271		2.2796	1.4214	1.1726	0.94789	0.79485		2.6314	1.7806	1.3999	0.83476	1.1697
2.636	1.1747	0.85418	0.62532	0.55381		1.8871	1.2645	1.0951	0.91819	0.81512		1.6359	1.1492	0.95593	0.52126	0.64153
5.4409	2.3469	1.442	0.6455	0.48869		3.0167	2.012	1.5778	0.94789	0.71454		3.8568	3.629	2.9774	0.83476	1.3375
2.5726	1.209	0.86028	0.56479	0.53452		1.7842	1.2542	1.072	0.82913	0.79208		2.8904	2.0831	1.6792	0.93938	0.89658
2.7757	1.2589	0.87749	0.58497	0.53323		1.6434	1.1993	1.041	0.85881	0.78125		3.8377	2.3054	1.6564	0.93938	0.92872
3.1075	1.3661	0.95937	0.70604	0.65835		2.4158	1.5329	1.2615	1.037	0.96396		4.7655	3.1384	2.551	1.6735	0.32254
3.2706	1.419	0.97466	0.70604	0.68923		2.0896	1.4009	1.182	1.037	1.009		5.5566	3.8332	3.1059	1.7786	0.75702
3.0641	1.4396	0.98189	0.68586	0.62341		2.4816	1.5932	1.2713	1.0073	0.91317		5.1223	3.4081	2.7795	1.5684	0.964
3.5853	1.4755	0.96938	0.66568	0.67202		2.1842	1.415	1.1604	0.97759	0.98297		5.9659	3.7782	2.9643	1.7786	0.54657
2.3816	1.1051	0.79318	0.52444	0.37309		1.8083	1.2235	1.0331	0.76977	0.54374		2.8423	1.9073	1.6147	1.1488	0.54811
2.6455	1.1453	0.79905	0.62532	0.69494		1.6951	1.1327	0.96972	0.91819	1.0151		4.069	2.4744	2.0128	1.4634	0.77128
4.1137	1.5653	1.0121	0.66568	0.69291		2.5121	1.5579	1.244	0.97759	1.0193		3.6549	2.4748	1.919	1.0441	0.9326
2.3521	1.0538	0.73954	0.52444	0.78983		1.9704	1.2475	1.012	0.76977	1.1573		3.1826	1.9544	1.5705	0.93938	1.3954
3.2678	1.3458	0.88691	0.60514	0.56029		1.8785	1.2375	1.0298	0.8885	0.82436		4.0565	2.6428	2.1143	1.3585	0.94155
2.7105	1.3376	0.99036	0.78676	1.126		2.1848	1.5104	1.2915	1.1559	1.6635		3.3349	2.2294	1.796	0.83476	1.4592
2.2676	1.0513	0.79151	0.60514	0.70109		1.6379	1.1561	1.0298	0.8885	1.0249		2.5302	1.5624	1.2826	1.0441	2.13
2.5312	1.0869	0.78326	0.6455	0.70959		1.9012	1.2111	1.0301	0.94789	1.0415		2.8822	1.7671	1.4348	1.1488	0.79264
3.4868	1.493	1.0317	0.68586	0.62167		2.6342	1.6514	1.3476	1.0073	0.91945		4.3751	3.0636	2.5303	1.4634	1.0955
3.6553	1.5498	1.0604	0.72622	0.76605		2.473	1.6283	1.3469	1.0667	1.1236		4.784	3.0385	2.4239	1.4634	0.80327
4.4815	1.8336	1.1765	0.60514	0.49444		2.6618	1.7355	1.3946	0.8885	0.72761		2.6232	1.753	1.3514	0.6257	0.49989
2.213	0.93104	0.65247	0.54461	0.56656		1.5788	0.9973	0.83839	0.79945	0.82922		2.3809	1.4709	1.2176	0.93938	0.91584
2.6282	1.0305	0.68903	0.50426	0.49795		1.664	1.0272	0.84648	0.7401	0.73235		2.1877	1.4771	1.2575	0.93938	0.64911
2.8448	1.1823	0.773	0.50426	0.3843		1.6405	1.0727	0.88885	0.7401	0.5639		3.5669	2.5093	2.0359	1.1488	0.60923
2.3707	1.0168	0.71201	0.52444	0.62632		1.7336	1.1012	0.91435	0.76977	0.92163		2.886	2.0137	1.6691	1.0441	1.1208
3.8777	1.5559	1.0276	0.72622	1.0427		2.5204	1.5573	1.2536	1.0667	1.5426		5.0557	3.0263	2.385	1.6735	1.2612
4.0952	1.604	1.089	0.70604	0.68267		2.9531	1.7322	1.3829	1.037	0.99729		6.6383	3.3687	2.2521	1.0441	1.0973
2.8918	1.4326	1.0558	0.58497	0.7239		2.1423	1.5084	1.3067	0.85881	1.0619		2.2833	1.2391	0.88764	0.31257	1.1793
3.229	1.2692	0.87522	0.58497	0.5348		2.4632	1.4472	1.1621	0.85881	0.79008		1.5903	0.93704	0.72548	0.41689	0.88962
3.6794	1.6549	1.1444	0.68586	0.69367		2.6883	1.7397	1.4298	1.0073	1.0215		3.5128	2.1373	1.6024	0.7302	0.38238
3.6578	1.7	1.1807	0.76658	0.76443		3.0543	2.0482	1.6362	1.1262	1.1256		5.9107	3.919	3.2007	1.6735	1.3295
3.9541	1.4971	0.96957	0.66568	0.81352		2.5332	1.5167	1.2016	0.97759	1.1862		4.6498	2.9077	2.2394	1.2536	1.1863
3.3277	1.542	1.0673	0.68586	0.82791		1.9888	1.4305	1.2277	1.0073	1.2024		3.0488	2.2303	1.6893	0.93938	0.69461
3.0942	1.3989	1.0206	0.72622	0.66432		2.2927	1.523	1.3067	1.0667	0.97794		3.0543	1.5039	1.1819	1.0441	1.1673
3.55	1.6431	1.1429	0.62532	0.66584		1.8832	1.4182	1.2597	0.91819	0.97447		1.8122	1.4971	1.1854	0.52126	1.2695
4.0289	1.6941	1.1448	0.62532	0.62835		2.2591	1.572	1.3243	0.91819	0.92372		2.0307	1.4336	1.167	0.83476	0.17351
3.6257	1.4796	1.0069	0.6455	0.95644		2.6004	1.5676	1.2715	0.94789	1.3952		3.6479	2.1618	1.7387	1.1488	1.9417
3.2391	1.3942	0.96603	0.58497	0.79724		1.8706	1.2922	1.1273	0.85881	1.1738		1.4696	0.90622	0.6533	0.31257	0.4295
4.0544	1.6428	1.0568	0.58497	0.49174		2.0561	1.3982	1.1694	0.85881	0.72246		3.3026	2.738	2.2082	0.83476	0.59242
3.1864	1.3359	0.90811	0.56479	0.60139		2.0193	1.3347	1.1124	0.82913	0.8846		4.7912	2.7018	1.8485	0.7302	0.84239
3.887	1.5669	1.0075	0.50426	0.29608		2.075	1.3571	1.1151	0.7401	0.43522		2.3106	1.9365	1.4803	0.31257	0.4172
2.9758	1.3038	0.90665	0.56479	0.45084		2.0804	1.3479	1.1202	0.82913	0.65455		4.8117	2.5903	1.8703	1.0441	0.64452
1.9942	0.95382	0.71405	0.54461	0.6405		1.2911	0.9465	0.85888	0.79945	0.94159		2.1818	1.8157	1.4333	0.83476	0.85274
2.2743	1.0854	0.76794	0.60514	0.67463		1.3579	1.0399	0.91502	0.8885	0.99379		5.2838	3.7591	2.9255	1.5684	0.97299
2.0285	0.94685	0.69078	0.50426	0.48413		1.5022	1.0276	0.8842	0.7401	0.71038		2.3045	1.7424	1.5305	1.1488	0.69773
3.2923	1.4253	0.93528	0.48409	0.59855		2.0437	1.3729	1.103	0.71044	0.88069		5.7629	4.1315	2.9998	0.93938	1.0454
3.3574	1.3894	0.9331	0.62532	0.67783		1.9058	1.3008	1.0929	0.91819	0.99338		2.2822	1.635	1.3629	1.0441	0.89153
3.0599	1.3551	0.95995	0.60514	0.59417		1.8605	1.3015	1.1343	0.8885	0.86701		1.6693	1.2151	0.98659	0.7302	0.73233
3.026	1.3219	0.94177	0.6455	0.65655		1.9276	1.2881	1.1256	0.94789	0.96725		2.6724	1.7758	1.3775	0.93938	1.261
4.1439	1.7976	1.1515	0.6455	0.40316		2.5043	1.6889	1.3646	0.94789	0.5818		3.5132	2.6555	2.1039	0.83476	0.90004
4.3279	1.941	1.2279	0.60514	0.71648		2.7216	1.8286	1.4267	0.8885	1.0484		4.9855	3.9204	3.1418	1.1488	0.9213
5.2408	2.1325	1.2781	0.6455	0.74979		2.7282	1.7477	1.3596	0.94789	1.1075		5.26	4.2228	3.4189	1.3585	0.65476
3.8841	1.4878	0.96404	0.62532	0.60612		2.472	1.4836	1.176	0.91819	0.88324		7.0927	4.0883	2.7184	1.2536	0.78208
4.0375	1.6781	1.0729	0.62532	0.49628		2.8784	1.7129	1.3162	0.91819	0.72736		6.7945	4.4879	3.3453	1.6735	0.63649
3.8197	1.6266	1.0434	0.58497	0.6365		2.3132	1.5603	1.2449	0.85881	0.92852		5.8248	4.0901	3.0562	1.2536	0.90805
3.924	1.5837	1.0893	0.7464	0.83609		2.629	1.6414	1.3587	1.0965	1.2177		6.2919	3.6315	2.6918	1.3585	1.2891
4.5864	1.8693	1.1674	0.56479	0.63356		2.4184	1.6426	1.3195	0.82913	0.92381		4.1587	3.5261	2.6476	0.7302	1.3374
4.0226	1.7755	1.1677	0.66568	0.72487		2.4432	1.6874	1.3679	0.97759	1.0605		5.9488	4.7151	3.601	1.4634	1.6735
4.1952	1.7609	1.1476	0.62532	0.80717		2.4121	1.6394	1.3426	0.91819	1.1826		5.3962	3.8709	3	1.2536	0.77338
4.0714	1.9559	1.2966	0.58497	0.60298		2.259	1.7031	1.426	0.85881	0.88824		3.1722	3.1045	2.5436	0.52126	1.1012
4.7853	2.0586	1.2885	0.68586	0.71621		2.5574	1.7606	1.4177	1.0073	1.0477		6.5493	5.2718	4.2078	1.6735	1.5234
3.7816	1.6334	1.0779	0.60514	0.53498		2.2804	1.5733	1.2777	0.8885	0.7849		4.7053	3.4913	2.7615	1.3585	0.90995
3.5157	1.5311	1.0468	0.68586	0.53357		2.2927	1.5678	1.3138	1.0073	0.78557		4.2122	2.9086	2.1705	1.1488	1.4828
3.4158	1.4593	1.0002	0.70604	0.69837		2.5494	1.6372	1.3256	1.037	1.0233		4.8361	3.1722	2.5456	1.4634	0.50273
3.6309	1.5547	1.0167	0.60514	0.56438		2.3314	1.4983	1.2054	0.8885	0.82267		3.0372	2.1178	1.7762	1.1488	1.5398
3.0225	1.4104	0.943	0.50426	0.56609		2.008	1.3456	1.095	0.7401	0.82882		3.9245	2.9355	2.4165	1.1488	1.26
3.6976	1.4675	0.92555	0.56479	0.43239		2.36	1.4586	1.1368	0.82913	0.62942		5.1194	3.6751	2.8154	1.5684	0.44986
3.5165	1.4865	1.0091	0.46391	0.62141		1.9944	1.4045	1.187	0.68078	0.91851		1.1264	0.54052	0.33928	0.20832	0.65987
5.2429	2.0707	1.2956	0.68586	0.53095		2.8469	1.8527	1.481	1.0073	0.78102		5.1561	3.4973	2.7749	1.6735	1.1792
5.6487	2.3643	1.486	0.78676	0.7764		2.9619	2.0658	1.6683	1.1559	1.1368		3.2236	3.1851	2.554	1.0441	1.0003
3.4567	1.3209	0.86177	0.50426	0.47272		1.9034	1.2003	1.0009	0.7401	0.68941		2.5082	1.4672	1.0016	0.41689	0.58544
3.5293	1.4731	0.96145	0.52444	0.47938		1.8376	1.2841	1.0842	0.76977	0.70196		3.4676	2.6414	1.9226	0.6257	1.0031
3.7627	1.5114	1.001	0.54461	0.53925		2.1567	1.4062	1.1643	0.79945	0.79427		0.97868	0.7036	0.54565	0.41689	0.527
3.565	1.4104	0.91956	0.50426	0.62043		2.064	1.3461	1.1117	0.7401	0.90531		2.1872	1.2498	0.86304	0.41689	0.8876
3.6738	1.5746	1.0013	0.60514	0.51135		2.0446	1.3938	1.1318	0.8885	0.7422		3.9469	3.1011	2.6258	1.5684	0.69283
2.4897	1.2079	0.86039	0.56479	0.49647		1.7104	1.2536	1.0736	0.82913	0.71974		1.931	1.2449	0.94973	0.52126	0.29943
2.9803	1.1904	0.79906	0.56479	0.73104		2.0515	1.2522	1.0127	0.82913	1.0683		2.5268	1.5828	1.3271	1.0441	0.76328
1.8169	0.72926	0.51395	0.3227	0.21453		1.201	0.73874	0.63239	0.47331	0.31094		0.84999	0.45686	0.33755	0.20832	0.13537
3.8183	1.5558	1.0109	0.62532	0.51478		2.5143	1.5462	1.2274	0.91819	0.7551		5.3122	3.4611	2.6175	1.0441	0.54241
4.2598	1.8452	1.213	0.80694	0.86351		3.4777	2.0609	1.5841	1.1857	1.2773		8.0173	5.0963	4.1681	2.4106	1.4705
5.0026	1.8744	1.2043	0.70604	0.65197		2.9105	1.7794	1.4323	1.037	0.94172		3.9938	2.2214	1.6239	1.0441	0.52299
5.7573	2.166	1.3352	0.6455	0.76869		2.9461	1.9065	1.5148	0.94789	1.1236		6.1928	4.1934	2.8294	0.7302	1.3804
2.3078	1.1948	0.91354	0.7464	0.75641		1.8702	1.3553	1.204	1.0965	1.1067		2.7391	2.3046	2.0451	1.3585	0.68586
4.1713	1.7772	1.1911	0.7464	0.75354		2.9273	1.8332	1.4643	1.0965	1.0951		6.6441	4.5999	3.4848	1.4634	1.7642
2.7391	1.2296	0.8664	0.6455	0.51397		1.6027	1.1355	1.0024	0.94789	0.74955		2.7314	2.0652	1.8263	1.5684	0.77899
5.0974	2.1821	1.3995	0.70604	0.75416		3.3831	2.1442	1.6695	1.037	1.1097		9.6674	6.4026	4.6595	1.2536	1.5807
3.8958	1.8369	1.3083	0.80694	0.84069		3.0335	2.037	1.6862	1.1857	1.2183		7.5013	4.8044	3.4897	1.4634	1.3253
4.3233	1.8545	1.2669	0.72622	0.74125		3.3063	2.0253	1.6149	1.0667	1.0957		7.6989	4.4073	3.3123	1.5684	1.4628
3.8338	1.7383	1.216	0.80694	0.86605		2.5256	1.7824	1.4942	1.1857	1.2557		5.7787	3.9549	2.9742	1.4634	0.89154
3.4013	1.4094	0.98514	0.6455	0.70196		2.3404	1.4735	1.2304	0.94789	1.0179		2.2069	1.2986	0.99555	0.6257	1.1114
3.3532	1.3846	0.93236	0.52444	0.36943		2.4445	1.5503	1.2277	0.76977	0.54406		2.6472	1.425	1.0505	0.6257	0.5962
2.6469	1.2239	0.87937	0.56479	0.62411		1.8526	1.2676	1.0952	0.82913	0.91037		1.9845	1.3326	1.093	0.6257	0.29213
5.2646	2.2365	1.4535	0.68586	0.62858		3.1319	2.1223	1.7043	1.0073	0.92143		6.608	4.8986	3.7202	1.0441	0.92453
4.8093	2.2475	1.4244	0.70604	0.83424		2.5742	1.9041	1.5749	1.037	1.2052		5.0408	4.412	3.5889	1.0441	0.98313
3.6722	1.5866	1.0864	0.7464	0.70658		2.3625	1.5781	1.3411	1.0965	1.037		3.5374	2.2115	1.7118	1.1488	1.1012
3.9934	1.8187	1.2362	0.72622	0.6772		2.2715	1.6351	1.4178	1.0667	0.99383		4.2079	3.315	2.4874	1.0441	0.97834
3.6147	1.6488	1.1878	0.7464	0.71697		2.5861	1.7456	1.4989	1.0965	1.0625		3.9081	2.4487	1.7509	0.93938	1.5065
3.5246	1.5944	1.1196	0.68586	0.45456		2.4244	1.5721	1.3383	1.0073	0.669		2.9917	2.0583	1.677	0.93938	0.60882
2.8711	1.3067	0.96333	0.68586	0.72138		2.2608	1.4447	1.2517	1.0073	1.0594		3.6671	2.0432	1.4499	0.7302	1.4914
3.1141	1.2974	0.8946	0.66568	0.63471		2.3511	1.4679	1.1939	0.97759	0.92738		3.6915	2.0942	1.6367	1.1488	0.63922
3.6932	1.5639	1.0529	0.6455	0.65947		2.2785	1.5238	1.2658	0.94789	0.96762		3.3349	2.0097	1.5361	0.83476	0.89795
2.9046	1.2462	0.87463	0.58497	0.58392		2.2936	1.4561	1.1907	0.85881	0.84974		3.6176	2.1004	1.6064	0.93938	0.76124
3.9341	1.5584	1.0259	0.62532	0.73598		2.3081	1.4597	1.2027	0.91819	1.072		5.0531	2.8754	2.0245	0.93938	1.2339
2.8211	1.2401	0.87033	0.60514	0.57453		2.0315	1.3326	1.1246	0.8885	0.8427		2.2546	1.578	1.3323	0.83476	0.77724
2.3137	1.1166	0.79808	0.56479	0.55925		1.944	1.3367	1.1027	0.82913	0.82093		4.4534	2.7532	2.1981	1.1488	0.2872
2.5273	1.1239	0.81049	0.56479	0.46052		2.3351	1.4153	1.1523	0.82913	0.67551		5.0822	2.8393	2.2586	1.2536	0.55674
3.1683	1.2737	0.87419	0.60514	0.58974		2.2725	1.4092	1.1466	0.8885	0.86505		4.8292	2.5885	1.8878	1.0441	1.3052
2.9249	1.2115	0.8034	0.50426	0.50103		1.9009	1.2015	0.97788	0.7401	0.74013		3.0057	1.8435	1.4693	0.93938	0.7652
2.2927	1.0973	0.78308	0.54461	0.54937		1.6137	1.1543	0.98659	0.79945	0.80608		2.9145	2.0963	1.7686	1.1488	0.98443
3.3318	1.3942	0.942	0.56479	0.41464		2.5853	1.4937	1.1875	0.82913	0.60792		5.2196	3.1442	2.3837	1.1488	0.55246
3.6647	1.4155	0.91813	0.50426	0.47666		2.0896	1.3222	1.0824	0.7401	0.70172		3.3928	2.302	1.8368	0.93938	0.18559
2.9377	1.3548	0.93137	0.60514	0.47125		2.7707	1.6739	1.291	0.8885	0.6901		7.7548	4.4908	3.5163	1.8838	0.68772
3.044	1.2595	0.81027	0.50426	0.48681		1.9575	1.2571	0.99528	0.7401	0.71158		6.0334	3.7425	2.9054	1.4634	0.63222
2.5162	1.0111	0.68517	0.46391	0.74716		1.8264	1.1062	0.89306	0.68078	1.0998		4.1247	2.4223	1.9317	1.1488	1.0595
2.1467	0.96151	0.68628	0.50426	0.43453		1.6857	1.1106	0.92635	0.7401	0.6358		5.9355	3.1465	2.405	1.3585	0.17347
3.2817	1.4116	0.92848	0.52444	0.628		2.2361	1.4465	1.1528	0.76977	0.91926		3.3524	2.4073	1.9319	0.83476	0.76568
3.3773	1.3222	0.84814	0.50426	0.5399		2.0942	1.2845	1.0215	0.7401	0.79067		5.6647	3.6657	2.8103	1.2536	0.60204
1.8467	0.79736	0.5565	0.40339	0.37343		1.197	0.79672	0.68027	0.59184	0.54757		2.7586	1.726	1.3777	0.83476	0.45398
3.4514	1.5158	1.0494	0.68586	0.46575		2.2561	1.5113	1.275	1.0073	0.68881		3.0925	1.9649	1.5719	0.93938	0.40237
4.7281	1.918	1.2771	0.76658	0.66384		2.9242	1.8565	1.5094	1.1262	0.96638		5.4295	3.5866	2.4429	0.83476	0.80752
5.4055	2.2918	1.4767	0.84731	0.64277		3.3796	2.1646	1.7316	1.2451	0.9465		11.415	7.1452	4.7101	1.3585	0.82031
4.2391	1.8096	1.1802	0.66568	0.783		2.5005	1.6799	1.3788	0.97759	1.1396		4.8641	3.3544	2.5973	1.1488	0.68135
4.3527	1.7571	1.165	0.72622	0.78026		3.0601	1.926	1.5395	1.0667	1.1323		3.5345	2.0213	1.5814	0.93938	1.0371
2.9715	1.4081	0.99551	0.68586	0.71605		2.1169	1.4464	1.2321	1.0073	1.041		2.3295	1.648	1.3852	0.83476	0.65649
2.552	1.245	0.9144	0.72622	0.70231		2.0243	1.4189	1.2164	1.0667	1.028		7.1966	4.2132	3.433	1.989	1.589
3.6854	1.3535	0.87195	0.56479	0.51456		2.0693	1.286	1.045	0.82913	0.75836		2.7413	1.5139	1.0505	0.6257	0.87542
3.7716	1.6143	1.1251	0.6455	0.52931		2.0286	1.4659	1.2983	0.94789	0.77861		1.7644	1.3819	1.0716	0.52126	1.7625
4.1664	1.7359	1.1612	0.7464	0.56644		2.5086	1.6772	1.3942	1.0965	0.82529		1.781	1.2011	1.0242	0.83476	0.73753
4.3904	1.6982	1.1427	0.76658	0.76949		2.6011	1.6697	1.4055	1.1262	1.1282		5.2703	2.4486	1.5962	0.6257	0.75065
3.5841	1.6495	1.1393	0.76658	0.72298		2.8571	1.819	1.4808	1.1262	1.0548		3.2619	1.878	1.4874	1.0441	0.82676
3.4562	1.5367	1.0862	0.78676	0.75017		2.7832	1.792	1.4797	1.1559	1.1015		2.4384	1.5526	1.2874	0.93938	1.6236
4.5868	1.7546	1.164	0.66568	0.78348		2.6752	1.7501	1.4349	0.97759	1.1335		4.7948	2.6575	1.7823	0.83476	0.89803
3.7041	1.5701	1.0593	0.68586	0.7429		2.4515	1.6213	1.3296	1.0073	1.0934		4.4429	3.0657	2.4891	1.3585	1.3604
3.1346	1.3925	0.98763	0.70604	0.87302		2.1405	1.4626	1.2492	1.037	1.2787		3.7983	2.5411	2.0229	1.1488	1.5056
3.8515	1.668	1.1596	0.72622	0.72064		2.7263	1.7856	1.4788	1.0667	1.0534		4.2407	2.5594	1.9473	1.1488	1.4314
3.394	1.6485	1.2052	0.72622	0.78565		2.3465	1.7809	1.5525	1.0667	1.1401		1.6911	1.4272	1.2589	0.93938	1.3611
4.0253	1.7239	1.16	0.68586	0.91823		2.3109	1.6173	1.3671	1.0073	1.3635		2.8719	1.5017	1.0668	0.7302	0.78662
2.3827	1.3391	1.0513	0.7464	0.74179		2.2236	1.6379	1.4618	1.0965	1.0863		2.1122	1.8285	1.6495	0.93938	0.94196
3.9873	1.6559	1.1165	0.72622	0.60755		2.5592	1.6907	1.3905	1.0667	0.89832		4.9443	2.5149	1.7385	0.93938	0.74637
4.8496	2.1716	1.4498	0.78676	0.78605		2.7972	1.9773	1.6751	1.1559	1.1568		5.8378	3.8937	3.0686	1.1488	0.79061
4.3769	1.8208	1.2406	0.76658	0.85088		2.7131	1.78	1.4985	1.1262	1.2384		5.0335	3.1708	2.5203	1.2536	1.6628
2.4941	1.2433	0.92493	0.66568	0.79348		2.2978	1.5597	1.3109	0.97759	1.1576		1.8683	1.2149	1.0184	0.7302	1.5371
3.8794	1.7748	1.2274	0.66568	0.48394		2.7684	1.9149	1.5807	0.97759	0.70615		2.801	2.0915	1.6988	0.7302	0.63721
5.5134	2.21	1.3712	0.68586	0.72826		2.9017	1.8761	1.5112	1.0073	1.0584		5.0453	3.695	2.966	0.93938	0.58341
4.2619	1.7394	1.1543	0.66568	0.63624		2.4606	1.6686	1.3881	0.97759	0.92967		3.8538	2.7237	2.1027	0.93938	1.0869
4.9733	2.0397	1.3043	0.70604	0.43363		3.0452	1.925	1.5455	1.037	0.62947		5.7971	3.9178	3.1484	1.0441	0.18887
3.313	1.5729	1.1318	0.70604	0.54325		2.4463	1.6752	1.4295	1.037	0.79654		2.9459	1.9698	1.5481	0.93938	0.9008
3.9367	1.6184	1.1227	0.78676	0.52666		2.3713	1.5794	1.3568	1.1559	0.77366		2.7259	1.2817	0.8949	0.6257	0.97594
3.3232	1.5236	1.0941	0.66568	0.7654		1.9407	1.4484	1.3046	0.97759	1.1295		1.2509	0.86253	0.6597	0.41689	1.1398
4.2913	1.7475	1.2194	0.82713	0.8166		3.2422	1.9211	1.5803	1.2154	1.1984		3.0138	1.3871	0.91218	0.6257	0.47714
3.3498	1.6362	1.1894	0.72622	0.49516		2.363	1.7204	1.4943	1.0667	0.72975		1.4296	1.0824	0.92775	0.6257	1.3501
4.3702	1.8151	1.2328	0.7464	0.67549		3.381	2.1099	1.6661	1.0965	0.9884		2.2406	1.3537	1.1248	0.93938	0.75319
3.6489	1.6047	1.1215	0.72622	0.90471		2.5755	1.7136	1.4283	1.0667	1.3261		3.3399	1.8206	1.3816	1.0441	0.92402
6.6151	2.6246	1.6309	0.7464	0.98099		3.794	2.4147	1.8952	1.0965	1.4395		5.9385	4.4518	3.5612	1.3585	0.5742
3.4292	1.5024	1.0549	0.76658	0.98794		2.347	1.6031	1.3591	1.1262	1.4405		3.717	2.4345	2.0131	1.3585	1.2859
3.2088	1.5285	1.0995	0.6455	0.79881		2.2203	1.5541	1.3338	0.94789	1.1496		3.072	1.9236	1.3401	0.41689	0.70522
3.9154	1.6591	1.1335	0.7464	0.93403		2.4224	1.6379	1.3748	1.0965	1.3757		6.0473	3.7965	2.8752	1.8838	2.0617
4.4541	1.8446	1.292	0.88768	1.0418		2.6817	1.7836	1.5416	1.3047	1.5371		9.348	5.1121	3.4715	1.5684	1.9403
3.3711	1.5278	1.0484	0.68586	0.73017		2.0267	1.4403	1.2333	1.0073	1.0645		3.5917	2.3065	1.6251	0.93938	0.95507
4.9807	2.1522	1.4554	0.84731	0.90882		2.9431	2.0621	1.7393	1.2451	1.329		5.1908	3.3594	2.4069	1.1488	0.87158
3.985	1.8192	1.2884	0.82713	0.63135		2.5713	1.7818	1.5364	1.2154	0.92169		4.5076	3.3849	2.2214	0.83476	0.96623
3.2732	1.5142	1.1305	0.84731	0.74766		2.9012	1.8682	1.557	1.2451	1.0948		2.8048	1.6207	1.1917	0.6257	0.48928
4.5532	1.7372	1.2023	0.80694	0.73307		2.867	1.7516	1.4686	1.1857	1.0854		2.8692	1.5186	1.2191	0.93938	1.3439
5.3914	2.1594	1.4211	0.78676	0.88426		3.0109	1.8784	1.571	1.1559	1.3022		13.821	7.4278	4.5197	1.1488	1.1036
4.513	2.1331	1.407	0.76658	0.81414		3.0502	2.093	1.6776	1.1262	1.1867		4.1458	2.8462	2.1748	0.93938	1.8764
4.1617	1.6682	1.1044	0.72622	0.64121		2.6106	1.6895	1.3659	1.0667	0.94207		5.0385	3.3579	2.5754	1.5684	1.5574
3.3191	1.614	1.1887	0.84731	0.85942		2.571	1.7253	1.5014	1.2451	1.2586		1.3817	1.0876	1.0236	0.93938	1.0656
4.4445	1.8155	1.2081	0.66568	0.79467		2.781	1.7546	1.4337	0.97759	1.1541		3.5731	2.4818	1.8645	0.83476	1.1664
4.3392	1.8773	1.2173	0.62532	0.45516		2.4036	1.6515	1.3676	0.91819	0.66596		6.9247	5.4658	4.2939	1.3585	0.52691
3.7592	1.4567	0.95131	0.6455	0.82448		2.3355	1.4512	1.1736	0.94789	1.2132		7.1866	4.458	3.2017	1.5684	1.802
5.8942	2.3988	1.4374	0.62532	0.69486		3.3623	2.1669	1.6573	0.91819	1.0234		6.8741	5.0356	4.1436	1.4634	0.75105
5.0993	2.0129	1.2323	0.58497	0.48213		2.8919	1.8217	1.4102	0.85881	0.71072		10.354	7.3196	5.2826	1.3585	0.77588
4.9195	1.9774	1.2076	0.60514	0.69344		2.8278	1.7628	1.3673	0.8885	1.0229		8.1963	4.9341	3.4717	0.93938	1.6461
5.9261	2.3092	1.3803	0.56479	0.60914		3.1214	1.9678	1.5235	0.82913	0.90113		6.9184	5.2131	4.0696	0.83476	0.5367
2.1489	0.92376	0.61483	0.36304	0.29547		1.4473	0.93325	0.75455	0.53256	0.43057		4.4381	3.0027	2.2506	0.7302	0.32975
3.1489	1.5371	1.1203	0.80694	0.76329		1.9285	1.4826	1.3364	1.1857	1.1134		3.1696	2.6025	2.0522	1.3585	0.73437
3.9949	1.8032	1.2412	0.70604	0.56745		2.3295	1.6525	1.4241	1.037	0.83568		3.1125	2.1135	1.6349	0.7302	0.95015
4.4713	2.0048	1.3649	0.76658	0.76163		2.7555	1.9466	1.6388	1.1262	1.1194		2.653	2.3001	1.8183	1.0441	1.0995
5.3792	2.3071	1.5036	0.88768	0.71285		3.6526	2.3397	1.841	1.3047	1.0353		6.3147	4.2911	3.0658	1.2536	0.97128
3.826	1.7848	1.2698	0.82713	0.88343		2.6992	1.84	1.5768	1.2154	1.2851		5.3455	3.3497	2.3556	1.1488	1.4666
4.0657	1.9413	1.3409	0.7464	0.51856		2.4133	1.7756	1.5292	1.0965	0.76162		4.3617	3.6094	2.6766	0.7302	1.769
5.8835	2.3175	1.4577	0.72622	0.78883		3.084	1.9873	1.606	1.0667	1.1639		3.8853	2.823	2.1133	0.83476	1.3266
4.0944	1.8845	1.3095	0.80694	0.78431		2.9065	2.021	1.6778	1.1857	1.1577		3.6448	2.3328	1.838	1.0441	1.434
4.8343	1.9824	1.3454	0.84731	0.89347		3.2948	2.0581	1.6765	1.2451	1.3069		4.319	2.5988	1.9654	1.1488	1.4685
3.9299	1.8854	1.3412	0.82713	1.1527		2.3405	1.7173	1.5433	1.2154	1.7047		1.4406	1.1639	0.97841	0.7302	2.1426
5.8462	2.2649	1.3986	0.66568	0.71158		3.0646	1.998	1.5825	0.97759	1.031		3.7809	2.8327	2.0244	0.6257	1.4534
3.0736	1.5296	1.1368	0.76658	0.92483		2.5826	1.8	1.5415	1.1262	1.372		3.2324	2.0874	1.7222	0.93938	1.0652
3.4835	1.6174	1.152	0.7464	0.6196		2.2992	1.6125	1.3976	1.0965	0.91101		2.6894	1.6232	1.2067	0.7302	0.48178
3.8434	1.7253	1.1947	0.66568	0.63182		2.2079	1.6028	1.3807	0.97759	0.93634		0.92299	1.0339	0.90832	0.6257	0.94634
3.4786	1.7435	1.2588	0.60514	0.57209		2.2948	1.71	1.4949	0.8885	0.84155		2.7714	1.6107	1.0907	0.31257	2.3177
2.8109	1.4152	1.0715	0.7464	0.51993		2.2117	1.5723	1.3891	1.0965	0.76883		1.3563	0.74657	0.59959	0.41689	0.59807
3.7206	1.7617	1.2486	0.78676	0.88162		2.1606	1.6475	1.4649	1.1559	1.2847		1.5781	1.3222	1.079	0.6257	0.72826
4.8355	2.1059	1.4202	0.78676	0.75521		3.0983	2.0677	1.707	1.1559	1.1011		3.2777	2.3445	1.7075	0.7302	1.4761
4.1608	1.8372	1.2475	0.66568	0.80321		2.6437	1.7832	1.4884	0.97759	1.1831		2.8002	1.6473	1.2001	0.6257	0.56495
4.2707	1.7855	1.2449	0.88768	0.97211		3.4333	2.0539	1.6549	1.3047	1.437		5.8784	3.0747	2.2549	1.1488	3.5964
4.2154	1.7216	1.1694	0.78676	0.8458		2.7496	1.8	1.4832	1.1559	1.2323		5.5396	3.6091	2.9342	1.989	1.44
3.8701	1.6177	1.0731	0.62532	0.58361		2.9384	1.8178	1.4237	0.91819	0.85858		3.8766	2.3669	1.8821	1.0441	0.94482
5.0245	2.0113	1.2735	0.62532	0.45414		3.8125	2.2453	1.6835	0.91819	0.66602		8.162	4.6072	3.4557	1.4634	0.51775
3.9882	1.9034	1.3198	0.76658	0.68053		2.5018	1.8247	1.5703	1.1262	0.99937		0.90588	0.80821	0.70036	0.41689	0.3549
4.1235	1.7639	1.1842	0.76658	0.62656		2.7888	1.7712	1.4588	1.1262	0.92178		1.3079	1.2177	1.1093	0.7302	0.77447
4.3441	1.8239	1.2761	0.84731	0.85313		3.4063	2.0409	1.6658	1.2451	1.2447		4.2599	1.9971	1.3448	0.6257	1.2768
3.6751	1.543	1.1231	0.80694	0.99968		2.4513	1.5875	1.3954	1.1857	1.4511		3.4789	2.0693	1.5209	0.83476	2.6427
4.3525	1.9237	1.3258	0.7464	0.81469		2.6149	1.834	1.5635	1.0965	1.1958		3.0709	1.4854	1.052	0.7302	0.81601
3.7336	1.6593	1.222	0.7464	0.55882		3.029	1.916	1.6101	1.0965	0.8248		2.7194	1.5328	1.1567	0.6257	0.87516
4.363	1.9834	1.4234	0.76658	0.5979		3.03	2.0132	1.7235	1.1262	0.88065		3.2361	1.5118	1.0364	0.52126	1.0849
3.5584	1.6492	1.1425	0.58497	0.63192		2.6424	1.8052	1.4873	0.85881	0.93227		3.6786	2.3322	1.8151	0.7302	1.1624
4.0517	1.6703	1.1191	0.72622	0.71394		2.6639	1.7435	1.4129	1.0667	1.0577		4.7061	2.6172	1.9376	1.0441	0.98893
3.937	1.6473	1.1337	0.6455	0.53203		2.7028	1.7213	1.4148	0.94789	0.76879		2.1654	1.2735	0.95025	0.52126	1.0938
2.0977	1.0927	0.79574	0.48409	0.43711		2.0548	1.4115	1.1408	0.71044	0.64228		2.688	2.1373	1.7778	0.7302	0.26509
4.1627	1.8733	1.3571	0.92804	0.98925		3.1759	2.0432	1.7473	1.3642	1.4589		3.0442	2.0494	1.6043	1.0441	1.7172
3.0603	1.6364	1.2504	0.88768	0.84857		2.4808	1.7843	1.5853	1.3047	1.2553		2.2364	1.6911	1.4674	1.0441	1.3928
4.9405	2.1357	1.4751	0.90786	0.93222		3.3677	2.1737	1.8218	1.3344	1.3538		1.5188	0.81	0.59333	0.41689	0.47063
4.7171	2.1818	1.4429	0.78676	0.94119		3.1531	2.0932	1.699	1.1559	1.3973		1.6723	1.1674	0.94606	0.7302	1.6247
5.4549	2.4675	1.6227	0.78676	0.9354		3.7655	2.4579	1.9418	1.1559	1.3782		6.3434	4.9546	3.2879	0.7302	1.1988
5.4932	2.4145	1.5492	0.7464	0.70329		3.7194	2.4837	1.9187	1.0965	1.0457		7.4103	5.3272	4.1459	1.6735	0.63611
4.9936	2.0506	1.2952	0.6455	0.5169		2.6998	1.7937	1.4472	0.94789	0.75566		6.1909	5.2598	3.9124	0.93938	0.69675
3.4625	1.5221	1.033	0.54461	0.60089		2.2404	1.5191	1.2636	0.79945	0.86955		1.3466	1.0511	0.89453	0.52126	0.57163
3.5987	1.6086	1.1495	0.76658	0.67749		2.3358	1.6139	1.4053	1.1262	0.98363		2.8925	1.9073	1.5625	1.1488	0.90997
3.1368	1.4766	1.0682	0.68586	0.34022		2.0845	1.5181	1.3255	1.0073	0.49686		3.2946	1.9314	1.4311	0.93938	0.26674
6.3887	2.5968	1.6589	0.82713	0.80914		4.2216	2.6238	2.0411	1.2154	1.1733		6.398	4.8509	3.8235	1.3585	1.3645
4.2754	1.8918	1.3104	0.82713	0.80819		2.8864	1.939	1.6245	1.2154	1.1854		4.5014	3.0887	2.4609	1.3585	0.64803
3.803	1.77	1.2789	0.86749	0.88168		2.5111	1.7998	1.5805	1.2749	1.2981		2.5606	1.9202	1.5894	1.0441	1.032
3.3313	1.6429	1.2345	0.82713	0.84621		2.5316	1.8404	1.6382	1.2154	1.2384		3.4118	2.1832	1.7939	0.93938	1.3531
4.1145	2.0089	1.3711	0.76658	0.91117		2.22	1.7015	1.5041	1.1262	1.3399		2.2038	2.3262	2.1182	0.93938	1.4686
4.6913	2.0595	1.4092	0.70604	0.93468		2.7002	1.907	1.6475	1.037	1.3806		2.3063	1.5145	1.1341	0.52126	0.68826
3.1365	1.5306	1.129	0.78676	0.88693		2.499	1.7509	1.4945	1.1559	1.2993		3.3079	2.275	1.8401	1.1488	1.9264
4.7007	2.0371	1.4007	0.92804	0.83388		3.0549	2.01	1.6995	1.3642	1.2355		2.866	2.1094	1.7669	1.1488	0.97303
5.8287	2.3797	1.5442	0.86749	0.83633		3.4715	2.2852	1.8384	1.2749	1.2243		2.8771	1.8498	1.348	0.93938	0.91937
3.8431	1.6738	1.1807	0.78676	0.66415		2.6036	1.714	1.4642	1.1559	0.9785		3.1211	1.956	1.5382	1.0441	1.3772
5.3595	2.3058	1.5275	0.78676	0.63195		3.5668	2.4009	1.917	1.1559	0.92396		4.3451	2.1705	1.4353	0.83476	1.2294
4.0508	1.8674	1.2807	0.7464	0.89064		2.798	1.9392	1.6089	1.0965	1.3031		3.6555	2.6383	2.1238	1.0441	1.603
3.3986	1.6324	1.2208	0.78676	0.69533		2.6066	1.8226	1.5894	1.1559	1.0218		2.8527	1.6847	1.246	0.6257	0.72324
3.5256	1.6418	1.2052	0.80694	0.79649		3.0203	1.9463	1.6297	1.1857	1.1772		5.306	2.7117	1.8799	0.83476	1.2753
3.6947	1.6959	1.1997	0.80694	0.78242		2.2071	1.6227	1.4261	1.1857	1.1515		4.5032	2.9726	2.2401	1.2536	1.1675
3.4467	1.6798	1.2016	0.76658	0.7166		2.4603	1.7374	1.4871	1.1262	1.0552		4.8233	3.1255	2.2928	0.93938	0.84394
4.5573	2.1215	1.3889	0.7464	0.53207		3.2021	2.1145	1.6828	1.0965	0.78145		4.9572	3.2819	2.6441	1.2536	0.30543
4.966	2.0281	1.372	0.96841	1.4117		3.1874	2.0478	1.6935	1.4237	2.0721		4.6409	2.32	1.4865	0.7302	2.116
5.1369	2.3203	1.5968	0.9886	1.2387		3.6999	2.3903	1.982	1.4535	1.8116		2.2079	1.2836	1.0022	0.83476	2.202
6.5263	2.7642	1.6677	0.58497	0.65454		3.3457	2.2949	1.7897	0.85881	0.94883		9.7547	8.08	6.1298	1.1488	0.78882
4.2878	1.7805	1.2133	0.80694	1.0317		3.0226	1.8994	1.5501	1.1857	1.5045		4.0673	2.6275	2.1304	1.2536	1.6448
5.4185	2.4082	1.5945	0.84731	1.0888		3.4028	2.3393	1.9013	1.2451	1.6135		9.9464	7.9395	6.0752	1.4634	1.1993
4.0874	1.76	1.2419	0.82713	0.66561		2.9651	1.9568	1.6389	1.2154	0.98236		2.4987	1.7871	1.5443	1.2536	0.65973
4.0248	1.8299	1.277	0.86749	0.82571		2.9045	1.9391	1.6249	1.2749	1.2111		3.5277	2.2485	1.7607	1.0441	1.5272
4.2412	1.9695	1.3833	0.78676	0.92493		3.1635	2.0916	1.7227	1.1559	1.3588		2.1522	1.5534	1.228	0.83476	1.3218
3.7487	1.7906	1.3145	0.84731	0.83887		2.5612	1.8498	1.6242	1.2451	1.2301		0.63542	0.83243	0.95276	1.1488	0.62988
3.7068	1.6519	1.2434	0.88768	0.74118		3.028	2.0032	1.7214	1.3047	1.0844		2.9952	1.4731	1.189	1.0441	0.68867
4.2767	1.8609	1.292	0.86749	0.82318		2.725	1.8385	1.5589	1.2749	1.212		2.0994	1.6946	1.3149	0.83476	0.812
5.7508	2.468	1.6028	0.9886	0.96973		3.8528	2.4458	1.9432	1.4535	1.4195		4.0493	2.677	2.1364	1.2536	1.246
3.5928	1.6226	1.1873	0.84731	1.0271		2.622	1.7637	1.5266	1.2451	1.5118		3.2057	2.1062	1.684	1.0441	1.1693
4.0817	1.7879	1.2482	0.80694	0.88923		3.1839	2.0449	1.6649	1.1857	1.2925		7.2006	4.2753	3.1482	1.4634	0.7786
3.7185	1.6471	1.1303	0.6455	0.49822		2.428	1.6697	1.387	0.94789	0.73		2.7451	1.8817	1.5362	1.0441	0.58694
3.3721	1.4824	1.0449	0.62532	0.47456		2.7447	1.7665	1.4399	0.91819	0.69854		2.106	1.3044	1.064	0.7302	0.68633
3.3006	1.6446	1.17	0.7464	0.87557		2.1032	1.6274	1.4177	1.0965	1.2801		2.5098	1.9826	1.7039	1.1488	1.7478
3.6719	1.6929	1.2003	0.72622	0.69219		2.3701	1.7339	1.4961	1.0667	1.018		1.8994	1.2354	0.98721	0.6257	0.88747
4.9577	2.0022	1.3356	0.78676	0.72954		3.161	2.0183	1.6432	1.1559	1.0521		7.6001	3.65	2.3855	1.0441	1.267
6.1544	2.5144	1.6016	0.86749	0.94701		3.7196	2.4484	1.944	1.2749	1.3843		2.9079	1.6421	1.0707	0.52126	1.2286
4.4912	2.1267	1.5161	0.88768	0.92282		2.8468	2.0214	1.761	1.3047	1.3501		2.2274	1.5886	1.2408	0.7302	1.7382
4.9303	2.0529	1.4048	0.92804	0.8868		3.1364	2.0566	1.7254	1.3642	1.3028		2.8927	2.0286	1.6998	1.3585	0.91742
4.2747	1.9452	1.3496	0.96841	1.061		2.7711	1.9251	1.6426	1.4237	1.563		2.1397	1.4924	1.2618	0.93938	1.737
4.8248	2.1409	1.4994	1.0492	1.247		2.8451	2.0396	1.7686	1.5429	1.8398		5.2519	3.0809	2.1798	1.5684	2.0566
3.6752	1.7841	1.3137	0.88768	1.0486		2.8864	1.98	1.698	1.3047	1.5366		2.1373	1.3761	1.1008	0.7302	1.7534
4.6306	2.0537	1.446	0.94823	0.86946		3.2052	2.108	1.7836	1.394	1.2814		4.0822	2.3245	1.7252	1.2536	0.89559
4.4613	2.0649	1.4863	0.86749	0.79724		3.3905	2.2405	1.8864	1.2749	1.1726		3.9402	2.5141	1.9155	1.1488	1.1411
3.8398	1.8646	1.3865	0.96841	1.2883		3.179	2.1916	1.8881	1.4237	1.9026		7.1855	4.059	3.1232	1.6735	2.5053
2.8194	1.5258	1.1398	0.66568	0.72625		2.6082	1.8888	1.5701	0.97759	1.0625		1.9281	1.5784	1.3721	0.93938	0.45204
5.0321	2.18	1.4306	0.76658	0.73204		2.8332	2.011	1.6683	1.1262	1.0662		5.0854	3.6136	2.6186	1.1488	0.56948
5.1168	2.2538	1.5358	0.96841	1.105		3.2829	2.189	1.8304	1.4237	1.6327		5.4539	3.6519	2.7986	1.4634	1.4296
5.7925	2.376	1.5827	0.94823	0.8431		3.5314	2.3219	1.9145	1.394	1.2366		3.3649	2.2189	1.713	1.0441	1.3048
4.1247	1.9755	1.3932	0.92804	0.89284		2.7206	1.9308	1.6724	1.3642	1.2981		2.2164	1.8139	1.651	1.4634	1.165
7.201	3.0549	1.9486	1.0895	1.5115		4.1375	2.858	2.3064	1.6025	2.2157		1.9799	1.3369	1.1032	0.93938	2.2623
4.9552	2.18	1.5199	0.92804	0.99275		3.6643	2.3938	1.985	1.3642	1.4526		5.1617	3.4312	2.7928	1.3585	2.1898
5.9171	2.7219	1.822	0.94823	0.88972		3.342	2.457	2.0845	1.394	1.3055		5.5937	4.3078	2.9816	1.0441	1.2775
4.1136	1.7801	1.2028	0.78676	0.91884		3.067	1.9665	1.5742	1.1559	1.3474		6.1193	3.7779	2.926	1.4634	1.4892
6.5304	2.7521	1.7992	0.84731	0.79188		3.6235	2.5214	2.065	1.2451	1.168		6.9413	5.8309	4.2745	1.1488	1.4024
4.8195	2.2408	1.5198	0.86749	1.0554		2.5803	1.9677	1.7161	1.2749	1.5389		3.0975	2.2249	1.6675	0.93938	1.4081
6.535	2.7675	1.7901	0.94823	0.90133		3.9224	2.5137	2.0519	1.394	1.321		6.0397	3.8837	2.6602	0.83476	1.984
5.4417	2.2721	1.5579	1.0088	0.94145		3.8438	2.391	1.9519	1.4833	1.3861		4.5987	3.161	2.3187	1.1488	1.5901
3.7836	1.8342	1.3502	0.92804	1.0628		2.9606	2.1336	1.8379	1.3642	1.5428		3.4776	2.4957	2.1068	1.1488	2.602
6.0644	2.6756	1.7534	0.92804	0.83886		3.6982	2.4992	2.0376	1.3642	1.2248		7.5333	6.0233	4.627	1.6735	2.0553
5.8238	2.4815	1.7179	1.1501	1.258		3.537	2.4298	2.0956	1.692	1.8203		3.0344	2.053	1.6758	1.2536	1.7186
5.357	2.3854	1.6353	1.0088	0.96588		3.4736	2.4244	2.0237	1.4833	1.4139		4.3386	2.692	2.1826	1.6735	1.1736
4.8203	2.3051	1.6679	1.0693	0.95072		3.034	2.2045	1.9553	1.5727	1.386		3.7906	2.4944	2.0026	1.5684	2.9157
1.8173	0.72437	0.48031	0.24201	0.23154		1.4712	1.1391	0.99569	0.54124	0.52232		2.9965	1.316	0.50638	0.099445	0.38861
2.3338	0.88853	0.56333	0.28235	0.24216		1.9647	1.4159	1.1855	0.63167	0.548		2.5432	1.279	0.64143	0.19897	0.29745
1.4777	0.54394	0.35939	0.20167	0.097644		1.4305	0.99738	0.8201	0.45087	0.22106		3.0642	1.0536	0.454	0.19897	0.0077252
1.2341	0.50825	0.34228	0.22184	0.21314		1.1718	0.85164	0.72429	0.49605	0.48379		1.2504	0.87308	0.7195	0.39825	0.67698
1.7822	0.63479	0.39447	0.14117	0.083504		1.6464	1.0995	0.86453	0.31544	0.18883		0	0	0	0	0.47787
2.1506	0.79762	0.50257	0.20167	0.19069		1.7907	1.2836	1.0629	0.45087	0.42955		0	0	0	0	0.16066
1.857	0.7153	0.45639	0.16133	0.18247		1.4046	1.1121	0.95025	0.36057	0.40911		0	0	0	0	0.20487
1.8738	0.68589	0.42966	0.1815	0.11243		1.4647	1.0999	0.91541	0.40571	0.25329		0	0	0	0	0.27529
2.1846	0.79661	0.50298	0.20167	0.1297		1.6778	1.2552	1.0577	0.45087	0.29224		0	0	0	0	0.56805
1.5685	0.5606	0.36304	0.24201	0.37643		1.5002	0.94113	0.77284	0.54124	0.84565		2.012	0.7364	0.53867	0.39825	0.49289
1.8718	0.70498	0.45613	0.24201	0.27812		1.8227	1.2833	1.0278	0.54124	0.62752		0.40831	0.31349	0.2094	0.099445	0.31487
1.633	0.57422	0.38904	0.22184	0.15653		1.3548	0.92602	0.81378	0.49605	0.351		2.2467	0.91303	0.53828	0.19897	0.61485
2.3742	0.75705	0.45235	0.1815	0.085134		2.2263	1.3049	0.98779	0.40571	0.191		0	0	0	0	0.36256
2.0497	0.65299	0.39815	0.20167	0.24027		1.7528	1.1017	0.86968	0.45087	0.53817		0.29487	0.17477	0.13984	0.099445	0.29115
2.6025	0.85465	0.54986	0.26218	0.24146		2.2637	1.5264	1.2567	0.58645	0.5392		0	0	0	0	0.74732
2.194	0.83864	0.5471	0.22184	0.1592		1.7786	1.3025	1.1241	0.49605	0.35829		0	0	0	0	0.56772
1.7506	0.73414	0.50595	0.3227	0.47161		1.6533	1.2255	1.0758	0.72217	1.0815		3.3697	1.8129	1.1828	0.49802	0.4976
1.2351	0.4619	0.30207	0.16133	0.18228		1.1632	0.78396	0.65162	0.36057	0.41396		1.7385	0.92213	0.47699	0.099445	0.15269
1.5293	0.51868	0.33067	0.16133	0.14119		1.1104	0.78703	0.68097	0.36057	0.31786		0	0	0	0	0.77083
1.0467	0.38252	0.24155	0.14117	0.17623		0.88513	0.6271	0.51651	0.31544	0.39391		2.6971	1.0416	0.42104	0.099445	0.69818
1.6747	0.55662	0.34596	0.1815	0.18843		1.4337	0.89779	0.72962	0.40571	0.43152		0	0	0	0	0
1.3168	0.36094	0.20422	0.14117	0.056938		1.1411	0.60073	0.43595	0.31544	0.12942		0.056484	0.12907	0.12315	0.099445	0.35509
1.8569	0.63423	0.39493	0.1815	0.23105		1.5557	1.0309	0.83556	0.40571	0.50956		0	0	0	0	0.93112
2.139	0.76864	0.48418	0.30252	0.25514		1.9343	1.2626	1.0257	0.67691	0.56667		3.896	2.2537	1.4376	0.69778	0.65126
3.4688	1.101	0.65166	0.26218	0.22153		2.7429	1.758	1.3821	0.58645	0.50303		0	0	0	0	0.68849
1.8097	0.73519	0.48389	0.24201	0.27695		1.5756	1.166	0.99971	0.54124	0.61669		0.88374	0.34494	0.19136	0.099445	0.087102
1.6228	0.58194	0.38581	0.28235	0.26989		1.5491	0.92485	0.77182	0.63167	0.60913		2.1719	0.96842	0.66434	0.29857	0.60293
1.7438	0.62383	0.41653	0.22184	0.22855		1.5029	1.0492	0.9067	0.49605	0.5138		0	0	0	0	0.42829
2.0464	0.69422	0.41579	0.22184	0.19308		1.7901	1.1347	0.87828	0.49605	0.42513		0	0	0	0	0.069349
2.2079	0.9463	0.63259	0.30252	0.26214		1.9924	1.5313	1.3319	0.67691	0.59424		0	0	0	0	0.26556
2.8351	0.95211	0.60902	0.3227	0.31523		2.3349	1.547	1.2928	0.72217	0.70865		2.6915	1.0364	0.4841	0.099445	0.72399
1.5029	0.65595	0.45526	0.3227	0.26528		1.4123	1.0449	0.92842	0.72217	0.59866		0.52526	0.33887	0.33392	0.49802	1.12
2.3861	0.89609	0.58732	0.3227	0.30518		2.1493	1.489	1.2579	0.72217	0.68045		0	0	0	0	0.076857
3.2841	1.124	0.68725	0.30252	0.28589		2.5734	1.7601	1.4285	0.67691	0.65902		2.7074	1.053	0.3959	0.099445	0.33351
1.4458	0.56539	0.39353	0.28235	0.32464		1.4493	0.95597	0.82814	0.63167	0.72795		1.907	1.1233	0.94413	0.69778	0.83602
1.4146	0.61779	0.41174	0.30252	0.25731		1.3458	0.97281	0.82941	0.67691	0.58151		1.7435	1.1889	1.0097	0.79778	1.6067
1.8676	0.71657	0.45006	0.3227	0.29706		1.9303	1.1782	0.91957	0.72217	0.66838		2.0521	1.2634	0.99746	0.59786	0.4562
1.5178	0.60775	0.40133	0.30252	0.21109		1.4686	0.97364	0.81117	0.67691	0.47922		2.137	1.3193	1.0107	0.49802	0.1029
1.9671	0.714	0.45872	0.30252	0.21808		1.9618	1.1547	0.93373	0.67691	0.49456		3.4416	1.8262	1.3388	0.59786	0.46808
2.0341	0.7194	0.45022	0.30252	0.31117		1.6998	1.1037	0.90352	0.67691	0.69887		3.762	2.1365	1.5328	0.69778	1.216
1.3748	0.61497	0.42507	0.3227	0.31935		1.4477	0.97055	0.82956	0.72217	0.72133		1.7642	1.2276	1.0706	0.79778	0.61011
2.7822	0.94052	0.59482	0.44374	0.37524		3.1537	1.6602	1.2777	0.99406	0.83675		8.8523	3.9696	2.4307	0.99801	0.8448
2.1399	0.81566	0.53618	0.22184	0.21401		1.948	1.4239	1.1969	0.49605	0.48456		0	0	0	0	1.043
3.0746	1.0518	0.63258	0.34287	0.37246		3.1565	1.8814	1.4165	0.76745	0.83421		7.0126	3.9495	2.4033	0.59786	1.5003
1.6386	0.77302	0.53692	0.38321	0.45654		1.6637	1.2189	1.0637	0.85804	1.037		2.5569	1.6067	1.3326	0.89785	1.289
2.0095	0.91209	0.62054	0.40339	0.41581		2.18	1.4978	1.2429	0.90337	0.94337		2.8275	2.0149	1.7314	1.0982	0.75064
2.0002	0.89931	0.60254	0.34287	0.41826		2.2667	1.5162	1.2224	0.76745	0.93287		3.7248	2.245	1.8116	0.99801	0.7609
2.3954	0.99292	0.62964	0.38321	0.33872		2.4459	1.5499	1.2188	0.85804	0.76318		3.8269	2.2413	1.7489	0.99801	1.0441
1.7767	0.75959	0.5003	0.3227	0.28299		2.0538	1.3342	1.0591	0.72217	0.64291		3.6352	2.0973	1.5707	0.79778	0.43093
1.989	0.88158	0.6182	0.42356	0.41512		2.0379	1.4499	1.2675	0.9487	0.94651		2.4793	1.3244	0.97365	0.49802	0.42684
2.1601	0.95437	0.64462	0.40339	0.17886		2.0307	1.4797	1.2871	0.90337	0.4015		2.5146	1.4694	1.0816	0.59786	1.1232
2.034	0.90025	0.62221	0.38321	0.32586		2.0902	1.4346	1.2298	0.85804	0.74245		2.3901	1.5627	1.333	0.79778	1.0976
2.2458	0.93984	0.6489	0.42356	0.5205		2.1957	1.5742	1.3614	0.9487	1.1814		2.2868	1.3858	1.1063	0.69778	2.0282
2.7502	1.1501	0.78219	0.52444	0.53188		2.6924	1.8584	1.6028	1.1756	1.195		2.9481	1.7972	1.4765	0.89785	0.73964
1.9295	0.8356	0.59165	0.44374	0.44119		2.2269	1.4095	1.2092	0.99406	0.98015		2.6848	1.632	1.3479	0.89785	1.9338
1.8678	0.86686	0.6129	0.42356	0.37144		2.0164	1.4193	1.2394	0.9487	0.84911		3.4492	2.0917	1.6917	0.99801	0.75733
1.742	0.87512	0.62461	0.36304	0.45199		1.969	1.4499	1.2492	0.81274	1.0311		2.6778	1.8778	1.6182	0.89785	0.18731
1.7871	0.83306	0.57896	0.36304	0.31651		1.9342	1.3592	1.173	0.81274	0.71314		2.1003	1.4312	1.1837	0.69778	0.7379
2.3544	1.0933	0.73005	0.38321	0.3053		2.5762	1.7425	1.4192	0.85804	0.69138		4.0553	2.6081	2.1743	1.0982	0.27881
2.5989	0.97324	0.644	0.46391	0.3515		2.866	1.6792	1.3504	1.0394	0.80548		3.7122	2.0371	1.5777	0.99801	0.75407
1.7452	0.78014	0.55829	0.38321	0.38305		1.7991	1.296	1.1418	0.85804	0.87017		2.0802	1.4762	1.2905	0.89785	0.51756
1.8815	0.85008	0.59926	0.36304	0.40732		2.0752	1.3919	1.1959	0.81274	0.91654		1.906	1.2468	1.0567	0.69778	0.2156
1.7358	0.79465	0.55337	0.40339	0.37501		1.654	1.2265	1.0771	0.90337	0.85615		2.9576	1.8608	1.5834	1.0982	0.22999
2.0137	0.8373	0.56971	0.40339	0.54834		2.0722	1.3374	1.1232	0.90337	1.2496		2.5725	1.7466	1.524	1.0982	1.4082
1.645	0.73133	0.51084	0.36304	0.45514		1.6971	1.2157	1.0575	0.81274	1.0306		3.0259	1.9418	1.6147	0.99801	0.6871
1.6123	0.69632	0.47006	0.28235	0.19688		1.4744	1.0905	0.94631	0.63167	0.44273		2.1457	1.3899	1.0852	0.59786	0.47054
1.4212	0.69353	0.50486	0.40339	0.50682		1.5901	1.1473	1.0129	0.90337	1.132		1.5829	1.2413	1.1724	1.0982	0.18637
3.1795	1.2045	0.72556	0.38321	0.28957		2.6181	1.7301	1.3782	0.85804	0.65504		5.8901	3.5312	2.6106	0.99801	0.59909
2.3951	1.0106	0.66372	0.36304	0.32313		2.1049	1.6124	1.3646	0.81274	0.7296		4.6491	3.0906	2.1859	0.59786	0.54052
2.6784	1.037	0.65536	0.38321	0.43319		2.302	1.6638	1.382	0.85804	0.98582		5.4895	3.5437	2.1386	0.59786	0.98878
2.7817	1.0081	0.65955	0.36304	0.31145		2.386	1.7107	1.4485	0.81274	0.71147		6.2674	3.3628	1.4782	0.29857	0.70471
2.1401	0.92974	0.64809	0.44374	0.45621		2.3727	1.6217	1.3549	0.99406	1.033		3.2299	1.9033	1.5675	0.99801	1.2128
1.8123	0.81435	0.56118	0.36304	0.3461		1.8209	1.2838	1.105	0.81274	0.77674		1.8141	1.2545	1.065	0.69778	1.3193
1.8932	0.86636	0.64573	0.44374	0.34842		2.2005	1.5106	1.3277	0.99406	0.78178		2.7929	1.774	1.5811	1.1986	0.52447
2.3356	1.0271	0.71171	0.46391	0.44018		2.6552	1.7124	1.4186	1.0394	1.0027		3.2147	1.8275	1.4727	0.99801	1.2286
2.1847	0.87534	0.58646	0.42356	0.2979		2.22	1.4399	1.2003	0.9487	0.67191		2.4831	1.4099	1.0907	0.69778	0.37365
2.3025	1.026	0.72101	0.50426	0.46229		2.6148	1.7349	1.4879	1.1302	1.0472		2.1096	1.3263	1.1087	0.79778	0.58871
2.1296	1.0238	0.71842	0.48409	0.58632		2.3747	1.671	1.4263	1.0848	1.3139		2.8012	1.7692	1.4728	1.0982	0.94013
2.4667	1.015	0.68172	0.40339	0.49091		2.841	1.7176	1.3974	0.90337	1.0891		3.3419	1.8195	1.4358	0.89785	1.5013
2.1253	1.0019	0.70354	0.48409	0.37966		2.3947	1.6824	1.4461	1.0848	0.85404		2.1673	1.5805	1.372	0.99801	0.59197
1.8696	0.95048	0.70635	0.46391	0.54046		2.2216	1.5971	1.423	1.0394	1.2344		2.5981	1.7102	1.458	0.89785	1.4093
2.5846	1.1615	0.80222	0.56479	0.54253		2.6273	1.8359	1.586	1.2665	1.2364		4.4645	2.6141	2.1391	1.3994	0.98967
1.9827	0.93661	0.68572	0.48409	0.50186		1.9123	1.5032	1.3882	1.0848	1.139		2.8767	1.7832	1.4933	1.0982	1.0001
2.4084	1.0118	0.65689	0.42356	0.32999		2.4503	1.6219	1.3227	0.9487	0.74873		3.7305	2.3817	1.8895	0.99801	0.62511
1.9399	0.94296	0.68627	0.44374	0.53203		2.177	1.5589	1.3623	0.99406	1.2039		2.8889	1.8064	1.5751	1.0982	0.80483
2.1579	1.0991	0.79203	0.56479	0.55843		2.3706	1.7834	1.5676	1.2665	1.2428		3.2418	2.4047	2.0998	1.3994	1.2304
1.9446	0.81376	0.54291	0.3227	0.55002		1.8778	1.2787	1.0782	0.72217	1.2377		2.8299	1.7737	1.4473	0.79778	1.3971
3.1251	1.1312	0.73781	0.34287	0.41076		2.6336	1.888	1.5938	0.76745	0.93581		5.381	1.1615	0.43988	0.099445	1.0673
1.8551	0.80037	0.51195	0.34287	0.23612		1.7989	1.2373	1.0148	0.76745	0.53181		2.4486	1.7744	1.5357	1.0982	0.66811
2.6866	0.9667	0.60892	0.44374	0.32414		2.1998	1.4067	1.1626	0.99406	0.74095		3.662	2.1694	1.8074	1.3994	0.76505
1.7975	0.78674	0.55294	0.38321	0.44449		1.9186	1.2595	1.0801	0.85804	1.0079		2.3858	1.4098	1.1843	0.89785	1.2841
2.2736	0.90288	0.59588	0.44374	0.52816		2.2204	1.4316	1.2018	0.99406	1.1921		3.1782	1.975	1.6355	1.0982	2.0219
2.0603	0.87917	0.60687	0.42356	0.55804		1.9271	1.3611	1.1998	0.9487	1.2605		2.4611	1.6646	1.46	1.0982	2.3827
1.6358	0.77474	0.5595	0.46391	0.42455		1.7998	1.2905	1.1403	1.0394	0.94557		2.4658	1.6869	1.4746	1.1986	0.64366
2.3354	0.98972	0.66095	0.50426	0.4873		2.5077	1.5767	1.2985	1.1302	1.0829		3.0924	1.9594	1.6779	1.299	0.56219
2.7585	1.1153	0.7067	0.46391	0.3334		2.5514	1.7203	1.4089	1.0394	0.75256		4.7954	3.05	2.3843	1.0982	0.51922
1.6237	0.87425	0.64952	0.40339	0.43776		2.0765	1.4778	1.2747	0.90337	0.98334		2.5485	1.7547	1.5399	1.0982	0.47809
2.2632	0.93557	0.60234	0.38321	0.34932		2.3207	1.4616	1.1792	0.85804	0.77214		3.9074	2.3425	1.873	1.0982	1.0426
1.949	0.90427	0.61607	0.38321	0.51875		2.2267	1.5457	1.269	0.85804	1.1894		3.9472	2.4682	2.0408	1.1986	0.46574
1.8465	0.81283	0.55659	0.40339	0.46018		1.8585	1.3061	1.1264	0.90337	1.035		2.2255	1.4438	1.1993	0.79778	0.79793
2.7189	1.1147	0.713	0.44374	0.39768		2.8762	1.7656	1.403	0.99406	0.90738		3.3651	1.8877	1.459	0.79778	1.3437
2.8225	1.0034	0.62232	0.40339	0.33462		2.4685	1.5701	1.2519	0.90337	0.757		2.9242	1.6215	1.2224	0.69778	0.99953
2.138	0.86921	0.60006	0.40339	0.41678		2.3353	1.4969	1.2613	0.90337	0.93883		2.4956	1.3563	1.054	0.69778	1.5136
2.3826	1.0106	0.67683	0.48409	0.51306		2.6273	1.6867	1.3988	1.0848	1.1688		2.7192	1.8406	1.5543	1.0982	1.2723
2.7441	1.162	0.75451	0.42356	0.35408		2.8207	1.95	1.5994	0.9487	0.80436		4.8591	3.4573	2.6398	0.79778	1.3669
2.1791	0.91491	0.62539	0.44374	0.30335		2.1307	1.4056	1.2113	0.99406	0.6801		2.1924	1.3625	1.1629	0.89785	0.30658
2.0684	1.0354	0.74747	0.52444	0.56405		2.289	1.6859	1.4819	1.1756	1.2756		2.6254	1.8277	1.5593	0.99801	2.0827
2.8697	1.1669	0.75002	0.46391	0.60877		2.9125	1.8664	1.4839	1.0394	1.3647		3.4533	2.1725	1.762	0.99801	1.2764
2.3379	1.1208	0.74211	0.42356	0.24928		2.7699	1.8481	1.4777	0.9487	0.5722		4.1955	2.6941	2.1525	0.99801	0.43571
2.3762	1.0074	0.66007	0.40339	0.36592		2.458	1.6471	1.3496	0.90337	0.83537		4.3223	2.5076	1.9068	0.99801	0.14055
2.4664	1.0613	0.7254	0.46391	0.48063		2.5835	1.72	1.4508	1.0394	1.0817		3.741	2.1511	1.7239	0.99801	0.63372
2.0881	0.97637	0.67906	0.52444	0.45397		2.4417	1.7369	1.4762	1.1756	1.0172		2.9786	2.2049	1.8696	1.299	1.1199
2.4009	1.0991	0.77437	0.50426	0.57233		2.4972	1.8234	1.5947	1.1302	1.2745		3.2389	2.0301	1.5736	0.79778	1.8152
2.3038	0.96809	0.64356	0.36304	0.34987		2.1716	1.5675	1.3306	0.81274	0.79579		5.1992	3.2009	2.4173	0.89785	0.51485
2.0087	0.80528	0.56043	0.40339	0.33806		1.9162	1.2988	1.1501	0.90337	0.758		2.7998	1.5336	1.1433	0.59786	0.71667
2.5078	0.91307	0.60028	0.38321	0.55618		2.2477	1.439	1.1942	0.85804	1.2373		2.5946	1.4026	1.0368	0.59786	1.2036
1.8296	0.72674	0.50216	0.36304	0.36777		1.9571	1.1953	1.0171	0.81274	0.83417		2.639	1.3284	1.0631	0.79778	0.60778
1.845	0.82088	0.56722	0.44374	0.47536		2.0452	1.3228	1.12	0.99406	1.0823		2.5915	1.6074	1.399	1.299	1.2537
1.8029	0.74217	0.48853	0.34287	0.3288		1.8701	1.154	0.94744	0.76745	0.72637		2.3911	1.2911	1.034	0.79778	0.6224
1.9161	0.79579	0.5699	0.52444	0.48344		2.1333	1.3621	1.1859	1.1756	1.0845		3.133	1.6647	1.3655	1.3994	1.5056
2.1679	0.83718	0.55101	0.30252	0.14694		2.0098	1.3429	1.1239	0.67691	0.32915		1.7228	0.95007	0.70807	0.39825	0.41232
2.9378	1.0832	0.68536	0.54461	0.42851		2.6231	1.7075	1.3964	1.2211	0.96678		5.2976	3.072	2.4276	1.6006	0.72674
2.019	0.81666	0.57432	0.52444	0.5466		2.3511	1.4575	1.2246	1.1756	1.2246		2.9037	1.7555	1.5263	1.299	1.4711
2.0224	0.81208	0.55688	0.40339	0.36865		1.6937	1.2835	1.1455	0.90337	0.83741		4.6135	2.7432	1.8694	0.79778	1.6069
2.0717	0.8411	0.56951	0.34287	0.41879		2.3963	1.4996	1.2098	0.76745	0.94373		2.3236	1.3335	1.0216	0.59786	0.47003
1.0241	0.47661	0.33673	0.26218	0.2849		1.0676	0.80628	0.70656	0.58645	0.63814		2.0693	1.4676	1.2382	0.79778	0.79412
2.3956	1.0937	0.74673	0.48409	0.50508		2.7378	1.8207	1.4987	1.0848	1.1414		3.776	2.4377	2.0414	1.299	1.5521
2.4792	1.0788	0.7099	0.46391	0.50133		2.5142	1.662	1.3803	1.0394	1.125		3.4191	2.1387	1.7629	1.1986	0.4059
2.6575	0.98656	0.66044	0.48409	0.28701		2.4886	1.5719	1.3365	1.0848	0.65143		2.6553	1.5562	1.2782	0.99801	1.3365
2.3948	1.0756	0.72718	0.48409	0.4144		2.1949	1.6281	1.4173	1.0848	0.93962		3.2404	2.063	1.6644	0.89785	1.4761
2.6141	1.1577	0.81368	0.52444	0.67222		2.5513	1.8301	1.6133	1.1756	1.5266		2.4478	1.7484	1.5066	0.99801	0.48352
1.2811	0.62227	0.45592	0.28235	0.16803		1.4763	1.0182	0.88858	0.63167	0.37344		1.9999	1.2355	1.0881	0.79778	0.45574
1.5694	0.67643	0.48154	0.36304	0.20695		1.8449	1.1927	1.0106	0.81274	0.4725		3.1392	1.7204	1.371	0.89785	0.039427
2.6985	0.91924	0.59494	0.42356	0.39822		2.8806	1.5214	1.2091	0.9487	0.89048		3.9542	1.7288	1.3117	0.99801	0.95913
1.5588	0.66747	0.46558	0.34287	0.4843		1.5128	1.0626	0.93312	0.76745	1.0987		2.1002	1.3949	1.1821	0.79778	0.96446
3.4263	1.2679	0.76915	0.48409	0.46977		3.5441	2.0703	1.5733	1.0848	1.0586		7.4316	4.0449	2.8378	1.1986	1.0361
2.2163	1.0613	0.73983	0.52444	0.60132		2.3877	1.7092	1.4561	1.1756	1.3614		4.0092	2.655	2.3074	1.8022	1.772
1.8431	0.87632	0.61328	0.46391	0.46179		1.9799	1.4523	1.2482	1.0394	1.0423		2.9744	2.0555	1.796	1.3994	0.86556
2.4575	1.0529	0.70859	0.48409	0.28129		2.5869	1.6858	1.4002	1.0848	0.64463		2.6407	1.78	1.5122	0.99801	0.49644
2.811	1.1766	0.77321	0.54461	0.52659		2.6365	1.8073	1.5097	1.2211	1.1809		3.6746	2.5486	2.1561	1.3994	0.55108
2.6403	1.1298	0.76813	0.52444	0.68117		2.8183	1.8765	1.5604	1.1756	1.5357		3.5258	2.3112	1.986	1.299	2.1578
2.1093	1.0094	0.73072	0.60514	0.45278		2.3532	1.7195	1.5394	1.3575	0.98503		2.4353	1.8596	1.6278	1.1986	0.66482
2.9287	1.2349	0.83668	0.60514	0.61631		2.9767	2.0046	1.6896	1.3575	1.396		4.4453	2.7472	2.3311	1.5	1.6004
2.9857	1.3714	0.95192	0.58497	0.43977		3.2168	2.2053	1.8708	1.312	1.0041		4.3924	2.692	2.2124	1.299	0.8793
2.7359	1.0651	0.70075	0.50426	0.68292		2.7808	1.6939	1.3819	1.1302	1.567		4.1613	2.2245	1.8257	1.3994	1.602
1.6848	0.68747	0.48334	0.36304	0.28402		1.9556	1.1224	0.94156	0.81274	0.6448		1.2522	0.65505	0.52381	0.29857	0.71053
2.1356	0.9159	0.64352	0.46391	0.66895		2.6254	1.6163	1.3359	1.0394	1.5258		4.7104	2.3814	1.8859	1.299	2.0629
1.5819	0.86607	0.64243	0.36304	0.31605		1.8617	1.4194	1.2476	0.81274	0.70356		2.4217	1.7855	1.6245	1.0982	0.33583
2.1937	1.0276	0.69757	0.42356	0.54246		2.1625	1.5496	1.3039	0.9487	1.2159		3.7927	2.3582	1.9791	1.3994	0.92869
2.024	1.0548	0.78365	0.60514	0.58388		2.5345	1.7904	1.5772	1.3575	1.3264		2.0275	1.4903	1.3462	1.1986	1.4693
3.0371	1.1124	0.74874	0.58497	0.46158		3.1391	1.8771	1.5519	1.312	1.0385		3.2216	1.8071	1.4747	1.1986	1.7166
2.8344	1.1597	0.76881	0.52444	0.44611		2.4192	1.6813	1.4631	1.1756	1.0092		2.0197	1.4528	1.3219	1.0982	0.37829
2.6294	1.1472	0.81905	0.60514	0.52555		2.7692	1.8796	1.6654	1.3575	1.1888		2.7252	1.6376	1.3312	0.89785	1.7289
3.0727	1.1683	0.77286	0.50426	0.42244		2.9105	1.9308	1.6122	1.1302	0.96074		2.399	1.4749	1.2435	0.99801	0.78259
2.6645	1.1462	0.75999	0.50426	0.40322		2.3485	1.7006	1.4682	1.1302	0.91004		3.5435	2.1503	1.7502	1.1986	0.95738
3.13	1.1919	0.76857	0.52444	0.41411		3.098	1.9713	1.6099	1.1756	0.93696		5.9626	3.4592	2.5764	1.1986	1.3565
2.2875	1.0473	0.73825	0.52444	0.51998		2.32	1.5896	1.3995	1.1756	1.1749		2.4918	1.4789	1.2249	0.99801	1.2957
3.0829	1.2262	0.80832	0.60514	0.68605		2.6804	1.8661	1.6036	1.3575	1.5623		4.6953	2.8371	2.2847	1.5	1.3245
3.0787	1.2533	0.80038	0.52444	0.55553		3.257	2.0363	1.6324	1.1756	1.2388		5.1061	2.8764	2.2022	1.1986	1.0555
2.8852	1.3031	0.86949	0.56479	0.63068		3.1622	2.1657	1.783	1.2665	1.4233		5.2895	3.6248	3.0676	1.903	1.3838
2.987	1.2416	0.8006	0.58497	0.6998		2.6271	1.7973	1.513	1.312	1.5932		5.0287	2.9963	2.4564	1.8022	1.003
2.4417	1.0839	0.71532	0.44374	0.36073		2.2445	1.5845	1.3366	0.99406	0.79712		3.3606	2.101	1.7777	1.1986	0.6801
3.3714	1.5286	0.92413	0.34287	0.28243		3.5522	2.3019	1.7272	0.76745	0.62639		5.8913	3.8599	3.0805	1.1986	0.60035
2.5669	1.0956	0.74086	0.48409	0.39536		2.7306	1.7553	1.4884	1.0848	0.89518		4.219	2.3114	1.8399	1.0982	0.62177
2.7877	1.0989	0.75482	0.48409	0.24674		3.3365	2.08	1.7042	1.0848	0.55289		1.7218	1.1885	0.95565	0.69778	0.858
2.3085	0.93916	0.59728	0.40339	0.39983		2.1592	1.4156	1.1629	0.90337	0.89357		3.7339	2.4687	2.0029	1.1986	1.7466
2.6427	1.114	0.7302	0.44374	0.39739		2.6932	1.8065	1.4823	0.99406	0.89079		3.767	2.2269	1.7672	0.99801	0.41099
2.312	1.1717	0.82124	0.52444	0.42961		2.6172	1.8924	1.6124	1.1756	0.95995		3.6819	2.5836	2.2486	1.6006	0.67612
2.4294	1.1593	0.7982	0.56479	0.61635		2.5173	1.8666	1.6004	1.2665	1.3847		3.9061	2.8343	2.4877	1.8022	1.2444
3.3152	1.6163	1.1044	0.62532	0.62193		4.1082	2.7407	2.2221	1.403	1.3899		6.2066	3.9738	3.2824	1.8022	1.4308
1.7777	0.64327	0.40421	0.30252	0.3965		1.6724	0.99392	0.79588	0.67691	0.88122		2.4371	1.2526	1.006	0.79778	0.90812
3.0383	1.2426	0.8272	0.58497	0.3697		2.8726	1.9773	1.6831	1.312	0.83438		3.7853	2.367	1.906	1.1986	0.39984
2.4942	1.2925	0.91608	0.54461	0.52391		2.9279	2.0358	1.7248	1.2211	1.173		4.3711	2.9669	2.5994	1.7014	1.0885
2.9565	1.2711	0.84575	0.50426	0.54087		3.2427	2.0636	1.6666	1.1302	1.2219		5.0605	2.7605	2.201	1.3994	1.405
3.2123	1.3805	0.94486	0.54461	0.41742		3.9176	2.3254	1.873	1.2211	0.9516		5.6378	2.9654	2.3729	1.3994	0.9527
2.5316	1.1325	0.80659	0.56479	0.56387		2.9674	1.903	1.6182	1.2665	1.2897		3.8235	2.3217	1.9669	1.3994	1.9155
2.2989	1.0209	0.72587	0.52444	0.38172		2.4165	1.6569	1.453	1.1756	0.87028		2.5988	1.7409	1.511	1.0982	0.10788
2.9641	1.2192	0.77863	0.48409	0.46565		2.8739	1.8483	1.4882	1.0848	1.0575		4.1343	2.4263	1.9635	1.3994	1.2486
3.1342	1.2457	0.83123	0.62532	0.6546		3.376	2.0465	1.6937	1.403	1.496		4.9411	2.527	1.9497	1.299	0.96598
2.3854	0.97316	0.65902	0.50426	0.43523		2.5976	1.6376	1.3662	1.1302	0.97637		3.7388	2.1607	1.7516	1.3994	1.3958
2.7058	1.1516	0.77395	0.50426	0.42993		2.6887	1.82	1.5424	1.1302	0.98957		5.1232	2.5674	1.9657	1.1986	0.46308
2.5992	1.1571	0.81812	0.56479	0.53733		2.9795	1.9878	1.6835	1.2665	1.2007		4.7015	2.8212	2.3344	1.6006	1.7227
2.5442	1.1802	0.83436	0.58497	0.54137		2.7047	1.8871	1.6404	1.312	1.2243		3.1455	2.1843	1.9312	1.3994	1.3103
3.089	1.4357	0.98041	0.60514	0.53103		3.1401	2.2122	1.8801	1.3575	1.2128		5.787	3.512	2.934	1.8022	0.82498
2.7825	1.1953	0.81845	0.58497	0.62004		3.1648	2.0104	1.6658	1.312	1.394		4.3863	2.5584	2.0916	1.299	0.82122
3.0058	1.3515	0.92893	0.62532	0.67851		3.1464	2.1253	1.789	1.403	1.5486		4.6279	2.9247	2.4654	1.7014	1.2242
3.2035	1.485	1.0062	0.58497	0.45528		3.4881	2.3075	1.919	1.312	1.0387		5.234	3.1562	2.6442	1.7014	0.70382
2.5029	1.1234	0.79171	0.54461	0.52525		2.6332	1.7983	1.5515	1.2211	1.1992		3.438	2.3003	2.0178	1.299	1.3407
2.5587	1.1945	0.84547	0.54461	0.48154		3.0383	1.9538	1.6618	1.2211	1.0801		3.3958	2.1973	1.8465	1.0982	1.494
2.8279	1.1494	0.7924	0.60514	0.63607		3.0421	1.9075	1.6219	1.3575	1.4467		3.4051	2.1352	1.8485	1.6006	0.94796
3.1322	1.3595	0.92382	0.58497	0.58105		3.4524	2.3432	1.9185	1.312	1.3178		5.4164	3.3386	2.6822	1.6006	1.6988
3.6749	1.5358	0.97522	0.6455	0.47601		3.9346	2.4446	1.9285	1.4485	1.0668		5.6807	3.48	2.7679	1.6006	2.2521
3.6919	1.5389	0.9825	0.56479	0.44213		4.1243	2.599	2.0055	1.2665	0.99302		5.6342	3.4765	2.6799	1.1986	0.39877
2.5295	1.0057	0.70172	0.56479	0.72367		2.5561	1.6968	1.4681	1.2665	1.6225		3.4891	1.9423	1.5743	1.0982	2.1043
3.1446	1.1005	0.72363	0.48409	0.56225		2.8885	1.764	1.4614	1.0848	1.2674		2.3254	1.4149	1.2025	0.99801	1.5068
2.69	1.1747	0.82204	0.6455	0.54608		3.0264	1.88	1.6041	1.4485	1.2307		2.9155	1.872	1.6089	1.299	0.58516
2.4287	1.0333	0.70031	0.42356	0.36597		2.5405	1.7713	1.4868	0.9487	0.82608		3.1982	1.8185	1.3677	0.79778	1.1864
2.2146	0.96977	0.68219	0.52444	0.57856		2.2906	1.6323	1.4268	1.1756	1.3144		4.1987	2.2173	1.758	1.1986	1.7076
2.5742	1.1343	0.7658	0.46391	0.43817		2.9198	1.8863	1.5402	1.0394	1.0035		7.6164	3.5219	2.5946	1.3994	0.89876
2.5401	1.1083	0.74703	0.48409	0.37846		2.5149	1.7576	1.48	1.0848	0.85917		4.5263	2.5614	2.0819	1.299	1.1245
3.2104	1.3646	0.90388	0.54461	0.54782		3.333	2.352	1.9153	1.2211	1.2362		6.2228	3.8653	2.9073	1.3994	1.8818
2.5681	1.0557	0.71827	0.54461	0.61755		2.2362	1.6229	1.4398	1.2211	1.3937		3.5942	1.8336	1.4047	1.0982	1.1826
3.121	1.203	0.77716	0.62532	0.59643		3.3767	2.0601	1.6227	1.403	1.3638		8.0403	4.1933	3.0179	1.903	1.4302
2.7925	1.2489	0.83467	0.48409	0.48497		2.8511	1.9767	1.6492	1.0848	1.1036		3.7926	2.3251	1.9274	1.1986	1.282
2.8509	1.0736	0.67845	0.42356	0.48428		2.6214	1.6668	1.3467	0.9487	1.1013		5.1566	2.7195	2.0556	1.1986	0.17409
2.2949	1.1714	0.80591	0.48409	0.38693		2.3656	1.8186	1.546	1.0848	0.86708		4.327	3.1287	2.7275	1.7014	0.65851
2.3299	0.86972	0.56285	0.34287	0.30812		2.3997	1.542	1.2347	0.76745	0.7018		8.7942	5.1761	3.57	0.89785	0.6079
4.1899	1.5816	0.96597	0.52444	0.54317		3.967	2.5559	2.0051	1.1756	1.2341		9.9879	5.4608	3.5462	0.89785	0.79905
3.3608	1.2207	0.7861	0.54461	0.50969		3.027	2.0649	1.7091	1.2211	1.1591		7.5107	3.8716	2.3418	1.0982	0.71244
3.2078	1.1519	0.75945	0.52444	0.54308		2.7059	1.9125	1.6401	1.1756	1.2334		10.693	6.0725	3.0715	0.89785	2.0816
3.0173	1.1387	0.71897	0.48409	0.3996		2.7151	1.8213	1.4937	1.0848	0.90854		6.1686	3.7849	2.6395	1.0982	1.3035
4.0608	1.446	0.8803	0.36304	0.31192		3.0718	2.2631	1.8518	0.81274	0.69852		0	0	0	0	1.3971
3.267	1.462	0.97854	0.50426	0.3325		3.4372	2.4312	2.0099	1.1302	0.74837		6.3517	3.9856	3.0254	0.99801	1.1179
4.0005	1.6134	1.0053	0.62532	0.57128		3.7986	2.6127	2.0935	1.403	1.2897		12.463	7.9154	5.4876	2.004	2.0576
3.5767	1.397	0.89376	0.6455	0.62499		4.0903	2.4354	1.8834	1.4485	1.4139		8.006	3.9711	2.8756	2.004	1.9065
3.3179	1.3985	0.89962	0.50426	0.61582		3.2075	2.1364	1.7438	1.1302	1.3748		4.8199	2.8128	2.174	1.1986	1.0933
2.6359	1.2264	0.82427	0.54461	0.81598		2.9247	2.0289	1.6827	1.2211	1.8261		4.489	3.0954	2.5557	1.5	0.28028
3.0873	1.4135	0.95622	0.52444	0.67927		3.5218	2.391	1.9421	1.1756	1.5589		5.4353	3.5365	2.9088	1.6006	1.366
2.5454	1.1993	0.82042	0.60514	0.58963		2.9556	2.0811	1.7229	1.3575	1.3095		4.3589	2.9931	2.3987	1.3994	1.2598
2.8209	1.3459	0.90402	0.60514	0.59275		2.9737	2.1813	1.8104	1.3575	1.341		5.0215	3.476	2.9051	1.8022	1.6019
3.3707	1.5324	1.0356	0.68586	0.5593		3.6496	2.5193	2.0881	1.5396	1.2636		4.5262	3.1808	2.6821	1.7014	1.284
2.6877	1.2672	0.87104	0.50426	0.47952		2.9908	2.05	1.7118	1.1302	1.0738		3.5063	2.2907	1.9102	1.1986	1.4759
3.5068	1.6186	1.1365	0.72622	0.7266		3.7743	2.5879	2.2117	1.6308	1.6135		6.5815	3.89	3.3081	2.2062	1.4044
3.5858	1.5685	1.0825	0.68586	0.68438		3.9092	2.5995	2.1736	1.5396	1.5505		5.2297	3.2529	2.7811	2.004	2.1244
2.8748	1.2764	0.91835	0.70604	0.6169		3.3052	2.1978	1.8905	1.5852	1.3864		5.1238	3.1274	2.6588	1.903	1.909
2.4308	1.1569	0.78773	0.50426	0.36121		2.645	1.8074	1.5068	1.1302	0.81529		3.7632	2.4876	2.11	1.3994	1.0134
2.1768	0.82732	0.57088	0.56479	0.54496		2.0456	1.2907	1.1274	1.2665	1.2232		4.1018	2.1506	1.7783	1.6006	0.93243
2.6721	1.2501	0.88518	0.60514	0.70521		2.6878	2.0082	1.7859	1.3575	1.5729		3.1359	2.2583	1.958	1.299	1.0948
2.0179	1.0034	0.73565	0.50426	0.50436		2.1864	1.7267	1.5717	1.1302	1.1675		2.6151	1.6777	1.378	0.89785	1.2132
3.0647	1.2167	0.792	0.52444	0.63526		2.863	1.96	1.6295	1.1756	1.4257		2.9707	1.8888	1.5456	1.0982	0.76786
3.0103	1.2758	0.86713	0.58497	0.88497		3.0349	2.0893	1.7688	1.312	1.995		3.6691	2.4606	2.106	1.5	2.2981
2.8969	1.3014	0.88928	0.62532	0.5787		2.9422	2.0792	1.7951	1.403	1.3119		3.6603	2.7392	2.3666	1.6006	0.74888
3.0637	1.4334	0.95854	0.66568	0.68688		3.0588	2.1587	1.829	1.494	1.542		4.8505	3.2642	2.802	1.903	1.101
2.9319	1.4828	1.011	0.54461	0.51461		3.4986	2.3818	1.9544	1.2211	1.1628		4.9921	3.2307	2.6715	1.299	0.93419
3.9234	1.7119	1.0665	0.56479	0.47993		3.7495	2.5754	2.0712	1.2665	1.0794		8.0452	5.117	4.0189	1.7014	0.71256
3.2728	1.3103	0.89826	0.70604	0.76149		3.1939	2.1941	1.8658	1.5852	1.7217		5.5201	3.1536	2.4816	1.8022	1.4791
2.2707	0.93198	0.60944	0.44374	0.43118		2.0076	1.4278	1.2092	0.99406	0.96783		4.0807	2.6646	2.1413	1.1986	1.2498
2.7419	1.087	0.70986	0.48409	0.55364		3.0364	1.9383	1.5421	1.0848	1.2422		8.2657	4.3539	3.0007	1.3994	1.9534
3.0842	1.2684	0.82462	0.52444	0.34002		2.9655	1.9997	1.6517	1.1756	0.76695		5.6756	3.3965	2.725	1.5	0.70052
2.8473	1.2531	0.80493	0.48409	0.44813		2.7242	1.8882	1.535	1.0848	1.0185		4.769	3.0979	2.5651	1.5	1.0492
2.5507	1.1729	0.78673	0.48409	0.41972		2.3457	1.7603	1.518	1.0848	0.94264		3.4803	2.2827	1.8734	0.99801	0.88137
3.8509	1.4884	0.88577	0.52444	0.4991		3.4054	2.2865	1.7859	1.1756	1.1285		7.5014	5.0652	3.7708	1.3994	1.1499
2.8615	1.382	0.94173	0.52444	0.44482		3.0917	2.2561	1.8814	1.1756	0.99292		4.8125	3.2616	2.817	1.6006	1.1102
2.7009	1.2291	0.90056	0.58497	0.52367		3.3244	2.1475	1.8668	1.312	1.1914		4.4085	2.4315	2.0118	1.299	0.65752
4.5986	1.6481	1.0437	0.60514	0.53107		4.4591	2.5162	2.0264	1.3575	1.2093		2.2825	1.339	1.1112	0.79778	0.74482
4.1025	1.6022	1.0056	0.54461	0.57739		3.492	2.4261	1.9896	1.2211	1.2876		5.0962	3.2073	2.4345	0.99801	0.99918
4.181	1.6093	1.0322	0.58497	0.61807		4.2184	2.6063	2.0908	1.312	1.4216		5.7198	3.4113	2.6077	1.3994	1.335
3.0076	1.3386	0.90801	0.62532	0.53333		2.9454	2.0614	1.7535	1.403	1.2106		4.6551	2.3468	1.8208	1.3994	0.7342
4.168	1.7198	1.0794	0.56479	0.5855		4.2043	2.7387	2.1658	1.2665	1.3377		7.5368	4.2661	3.1927	1.3994	1.6996
4.2562	1.7221	1.118	0.6455	0.51338		3.8597	2.6471	2.2343	1.4485	1.1406		4.1141	2.4913	1.9623	1.0982	1.8311
2.321	1.1931	0.88356	0.56479	0.52495		2.6309	1.9614	1.7552	1.2665	1.1935		2.7226	1.8571	1.626	1.1986	1.8055
4.1829	1.8379	1.2195	0.80694	0.95915		4.4967	2.9047	2.4193	1.8133	2.1905		5.5384	3.4125	2.7037	1.6006	1.9697
11.109	6.2144	4.3607	1.1097	1.1932		1.3865	1.2432	1.1914	1.0152	1.0811		0.068201	0.2006	0.26058	0.42254	0.50399
9.4607	5.7087	4.1689	1.0693	1.2138		1.3516	1.2404	1.1946	0.97786	1.1108		0.51024	0.38575	0.32455	0.21077	0.9061
8.1331	4.5791	3.426	1.1501	1.1406		1.1713	1.0846	1.0741	1.0525	1.0554		1.4892	0.88939	0.58843	0.42254	1.0429
8.1138	4.3715	3.1455	1.0088	1.0196		1.2844	1.1087	1.0545	0.92194	0.92837		0.59513	0.41783	0.33125	0.21077	0.90658
9.2445	4.9645	3.6087	1.2712	1.2991		1.2807	1.1582	1.1246	1.1647	1.1872		0.033649	1.1035	1.7993	2.1531	1.3652
7.5321	4.1893	3.0922	1.1299	1.248		1.2051	1.0999	1.066	1.0338	1.1498		4.912	2.2096	1.7447	1.4964	1.0716
9.8156	5.2373	3.7073	1.1097	1.0934		1.2246	1.1158	1.0865	1.0152	1.0061		2.9903	1.5445	0.91133	0.42254	1.3481
8.3579	4.7778	3.4958	1.0693	1.2121		1.2799	1.1644	1.1204	0.97786	1.104		0.30718	0.59074	0.67746	0.84906	1.1191
9.2701	4.8989	3.5477	1.2511	1.0675		1.3134	1.1813	1.1477	1.146	0.96668		7.689	3.9561	2.4684	1.4964	0.64964
7.6856	4.4807	3.3418	1.1299	1.0508		1.253	1.1475	1.1157	1.0338	0.95924		0.88872	0.90888	0.87482	0.63529	1.4501
5.986	3.4917	2.6996	1.3318	1.2651		1.2961	1.1925	1.168	1.221	1.1781		8.307	4.7073	3.2379	2.3741	1.6342
7.2955	4.1289	3.0864	1.1299	0.88105		1.2457	1.1503	1.1186	1.0338	0.80245		3.2799	1.3941	0.93126	0.63529	0.63776
7.7721	4.4266	3.2291	1.0492	1.4299		1.2594	1.1591	1.1118	0.95921	1.313		0.60313	0.48165	0.44635	0.42254	1.057
8.0204	4.6487	3.3985	1.0895	0.94512		1.1323	1.0791	1.061	0.99651	0.86105		1.1068	0.90631	0.76232	0.63529	0.37239
8.1335	4.3753	3.2015	1.2914	1.3058		1.4361	1.2408	1.1784	1.1835	1.1816		6.6752	4.2461	3.421	2.3741	0.87606
9.9477	5.2109	3.7328	1.2107	1.3034		1.3298	1.1802	1.1434	1.1086	1.1977		5.5738	2.3537	1.4916	1.0638	1.4691
9.1579	5.2851	3.8524	1.2511	1.4241		1.2781	1.196	1.1703	1.146	1.3038		8.2513	4.0388	2.4333	1.2796	1.0544
10.18	5.3836	3.8216	1.2914	1.3266		1.3981	1.2484	1.2057	1.1835	1.2175		4.4299	2.6482	2.0353	1.7143	0.93281
9.8062	5.4201	3.9263	1.2914	1.2359		1.2966	1.2149	1.1977	1.1835	1.1383		3.6645	1.7677	1.3249	1.0638	1.3235
9.9335	5.4559	3.9327	1.2309	1.242		1.3217	1.1953	1.1652	1.1273	1.1348		0.085561	0.28408	0.40387	0.63529	1.3677
10.684	5.6689	3.9966	1.3318	1.47		1.3735	1.2154	1.1648	1.221	1.3612		2.4178	2.2611	2.122	2.1531	1.6303
8.8962	5.0085	3.6551	1.1299	1.0596		1.2762	1.1874	1.1537	1.0338	0.96194		1.4512	0.77641	0.70725	0.84906	1.1691
8.7408	5.1281	3.7874	1.0895	1.0881		1.3049	1.1968	1.1573	0.99651	1.0013		1.2208	0.55887	0.33476	0.21077	0.49097
8.1034	4.5735	3.3947	1.3116	1.2791		1.3501	1.2171	1.1808	1.2022	1.17		5.3445	3.6485	3.1097	2.3741	1.2315
8.1231	4.8501	3.6064	1.0693	1.1135		1.2371	1.1626	1.1301	0.97786	1.0213		3.1143	1.9349	1.4195	0.84906	0.42171
9.8609	5.4829	3.9689	1.2914	1.2859		1.3662	1.2467	1.2195	1.1835	1.1646		20.75	9.5311	3.3281	1.2796	1.067
8.5662	4.8211	3.5368	1.1905	1.2128		1.3517	1.2536	1.2174	1.0899	1.1086		4.1165	2.2457	1.5518	1.0638	0.82151
9.3043	5.5887	4.137	1.1299	1.1329		1.3492	1.2542	1.217	1.0338	1.0317		1.5458	0.88625	0.67424	0.42254	0.91738
7.1936	3.662	2.6649	1.0693	0.96137		1.2402	1.0733	1.0228	0.97786	0.87112		3.139	1.9855	1.5348	1.2796	0.87171
7.8805	4.1028	2.9408	1.0088	1.3089		1.1597	1.0133	0.97026	0.92194	1.2076		0.32683	1.1498	1.1013	0.84906	1.4192
6.6026	3.3506	2.4328	0.9886	1.1485		1.2627	1.0721	1.0113	0.90332	1.0476		1.1771	0.60342	0.43231	0.21077	1.5855
6.8272	3.7455	2.8199	1.1501	1.3142		1.2112	1.076	1.0457	1.0525	1.2035		5.4554	3.5428	2.8641	1.9332	1.3402
9.6134	5.5864	4.0322	1.0492	0.94024		1.1541	1.0828	1.0634	0.95921	0.84475		0.00013637	0.024833	0.095513	0.21077	0.93292
7.0746	3.8562	2.8382	1.0492	1.1038		1.1237	1.0301	1.0048	0.95921	0.99845		5.2762	1.2017	0.82844	0.84906	0.78874
7.1588	4.4342	3.3256	1.0693	0.9494		1.1073	1.0275	1.0045	0.97786	0.87028		1.4429	1.091	1.1401	1.2796	0.97842
7.7441	4.6873	3.4533	0.94823	0.78086		1.1011	1.0195	0.98919	0.86609	0.71179		1.2261	0.78217	0.65308	0.42254	0.67922
7.7595	4.2897	3.0882	1.0895	1.0947		1.1694	1.0327	0.98898	0.99651	0.99637		2.5142	1.9708	1.8169	1.9332	1.1201
8.0669	4.7148	3.4343	0.94823	0.84906		1.2118	1.0793	1.0274	0.86609	0.77536		1.4806	0.8777	0.71935	0.63529	1.0475
7.9842	4.4551	3.2603	1.0895	1.1069		1.0694	0.99219	0.98179	0.99651	1.0108		10.393	4.515	2.2268	1.2796	0.77486
7.9333	4.2392	3.0613	1.0492	1.0149		1.1303	0.9967	0.96477	0.95921	0.91254		1.5066	1.3702	1.3207	1.2796	0.78855
7.8187	4.467	3.2591	1.029	1.0731		1.2245	1.0765	1.0324	0.94057	0.98514		0.56113	0.61135	0.63276	0.63529	1.155
7.3738	3.9468	2.9033	1.029	1.1862		1.1736	1.0303	0.99553	0.94057	1.0854		0.55171	0.49807	0.47544	0.42254	0.82608
8.0039	4.5368	3.399	1.0693	1.1998		1.1681	1.0351	1.013	0.97786	1.0927		0.35315	0.32926	0.30109	0.21077	1.3869
7.3062	3.8049	2.7732	1.0895	1.2506		1.1299	1.0448	1.0208	0.99651	1.1527		9.4232	3.1148	1.7206	1.0638	1.5655
8.7923	4.8377	3.4722	1.0693	1.0267		1.1972	1.0653	1.0231	0.97786	0.9291		2.4022	1.8447	1.7864	1.9332	1.5783
8.6376	4.3301	3.0462	0.9886	1.0191		1.2054	1.0095	0.95057	0.90332	0.92396		0.75546	0.86168	0.90743	1.0638	0.91324
10.932	6.1665	4.2715	0.96841	1.0248		1.2611	1.1444	1.0861	0.8847	0.93608		1.9357	1.5044	1.0466	1.0638	0.81741
7.4337	4.0259	2.9377	1.0088	0.97483		1.0044	0.92187	0.90963	0.92194	0.89593		1.1032	1.1237	1.1147	1.0638	0.74374
6.5717	3.6252	2.6805	0.94823	0.8822		1.0483	0.95228	0.92873	0.86609	0.81432		1.7265	1.034	0.80532	0.63529	1.4413
6.9974	3.8175	2.7631	1.1299	1.2198		1.1671	1.0379	0.99764	1.0338	1.1139		6.0695	3.8974	3.1953	2.3741	0.54605
7.0672	3.9161	2.8371	0.92804	0.76093		1.0064	0.92862	0.90591	0.84749	0.68192		0.63713	0.63004	0.54479	0.42254	0.83089
6.8971	3.7426	2.7404	0.94823	0.90019		1.0387	0.93993	0.92275	0.86609	0.82094		0.13444	0.45935	0.33881	0.21077	0.58949
8.9646	4.5802	3.253	1.0693	1.2631		1.1503	1.0051	0.97365	0.97786	1.1416		0.21403	0.59365	0.76601	1.0638	1.4279
8.4372	4.5085	3.2152	1.1703	1.0681		1.1591	1.0142	0.98666	1.0712	0.966		4.4785	3.0558	2.6206	1.9332	0.41178
7.5103	4.1071	3.0084	1.0895	1.2035		1.1335	1.0153	0.99065	0.99651	1.1051		3.1392	1.7262	1.3782	0.84906	0.96876
7.1559	3.9092	2.8848	1.0693	1.0363		1.0663	0.95861	0.93619	0.97786	0.94338		5.6804	2.4483	1.4754	1.2796	1.2725
8.0996	4.5118	3.2243	0.9886	1.0318		1.0523	0.94991	0.91899	0.90332	0.9559		3.1444	1.9631	1.4133	1.2796	0.70953
6.6096	3.6843	2.7784	1.2107	1.0316		1.2517	1.1163	1.0793	1.1086	0.93832		4.0715	2.7229	2.3054	1.9332	1.2333
8.8197	4.7482	3.4004	1.0492	1.2273		1.2222	1.0743	1.0355	0.95921	1.1224		1.6728	0.86269	0.61035	0.42254	1.698
9.2074	4.8149	3.3803	1.0693	1.1635		1.3739	1.2121	1.1449	0.97786	1.0503		2.9138	1.6972	1.4201	1.0638	1.3382
6.0787	3.4594	2.6141	1.0492	1.1435		1.1608	1.0367	1.0094	0.95921	1.0469		0.58702	0.46147	0.45688	0.42254	1.2849
6.1597	3.7944	2.9083	1.1097	1.0089		1.0757	0.9974	0.98286	1.0152	0.91005		3.2673	2.3878	2.0044	1.2796	0.81558
5.1492	2.9231	2.273	1.1097	0.85042		1.3047	1.0938	1.0408	1.0152	0.77585		3.6395	2.2526	1.8164	1.2796	1.1812
7.849	4.3522	3.1854	1.0693	0.98532		1.2464	1.1123	1.0672	0.97786	0.88899		2.6096	1.2864	0.97981	0.84906	0.84797
5.7492	3.1877	2.3943	1.029	1.0616		1.0699	0.91894	0.89363	0.94057	0.96969		1.6481	1.4881	1.4677	1.2796	0.808
5.2405	2.8936	2.2295	1.0693	1.2356		1.1142	0.9238	0.89426	0.97786	1.1314		5.5174	3.1534	2.4134	1.7143	1.109
5.907	3.5914	2.6656	0.80694	0.71014		0.91899	0.86769	0.84512	0.73605	0.64357		0.4724	0.24601	0.22177	0.21077	0.51871
5.8142	3.1628	2.3446	0.88768	0.96532		0.91531	0.83132	0.81948	0.81031	0.86555		0.94625	0.85725	0.93428	0.84906	0.35923
7.0903	3.6598	2.6333	0.94823	0.92449		0.99117	0.8742	0.85071	0.86609	0.8472		0.66348	0.86001	1.1805	1.4964	0.68807
6.483	3.4378	2.5446	0.9886	0.98323		1.0386	0.91946	0.90142	0.90332	0.89978		0.40047	0.40084	0.40418	0.42254	1.0199
7.59	4.2043	3.0119	0.84731	1.0104		0.93302	0.87488	0.85178	0.77316	0.91974		6.7443	2.3953	1.3142	0.63529	1.0669
6.3202	3.4701	2.5665	0.96841	1.0104		0.98375	0.89683	0.87688	0.8847	0.92259		1.5713	1.1538	0.95865	0.63529	0.57047
7.0017	4.1413	3.0479	0.96841	0.99686		0.99408	0.92249	0.89327	0.8847	0.91441		3.153	2.1136	2.0982	2.1531	0.80762
5.4428	3.2329	2.4158	0.80694	0.67942		0.80413	0.78099	0.77872	0.73605	0.6169		0.84687	0.4799	0.35967	0.21077	0.50971
6.5226	3.5254	2.5066	0.94823	0.99117		1.3408	1.1211	1.0309	0.86609	0.90995		7.2049	3.1196	2.1834	1.2796	0.86452
5.6002	3.1564	2.3554	0.72622	0.77927		0.87514	0.77585	0.75207	0.6619	0.71298		0.78587	0.49127	0.38201	0.21077	0.29335
10.209	5.2313	3.6332	1.1501	0.87469		1.3644	1.1832	1.1266	1.0525	0.79779		0.0010263	0.083247	0.13012	0.21077	0.64143
6.8472	3.552	2.5122	0.86749	0.99922		1.129	0.96088	0.90176	0.79173	0.90535		0.73311	1.0584	1.3208	1.2796	1.297
4.0338	2.394	1.8588	0.84731	0.98634		1.0027	0.86488	0.82999	0.77316	0.9031		0.46718	0.5263	0.51171	0.42254	0.9226
4.6478	2.7414	2.0385	0.7464	0.95611		0.81396	0.73023	0.70312	0.68043	0.85778		2.369	1.7038	1.4404	0.84906	0.9947
3.4925	2.0076	1.5315	0.70604	0.61925		0.82661	0.73955	0.70419	0.64338	0.56517		1.43	1.0409	0.86638	0.63529	0.14337
9.064	5.497	4.1312	1.3924	1.3103		1.5064	1.3498	1.3053	1.2773	1.1886		5.1089	3.5579	2.9713	1.9332	0.95233
9.0173	4.9473	3.6575	1.352	1.4284		1.4437	1.3179	1.2894	1.2397	1.3217		0.3799	0.49814	0.5585	0.63529	1.8092
10.417	5.6465	4.128	1.352	1.5077		1.6001	1.3982	1.3395	1.2397	1.3762		1.1568	0.76659	0.65388	0.63529	1.376
7.6878	4.2247	3.1962	1.4328	1.1077		1.4601	1.351	1.3294	1.3148	1.0239		3.4769	2.3969	1.8514	1.2796	0.76495
10.24	5.5055	3.95	1.2107	1.1477		1.4938	1.3263	1.269	1.1086	1.0461		0.96141	0.7951	0.74882	0.63529	0.85897
10.102	5.6511	4.1326	1.4126	1.2937		1.5183	1.3779	1.3407	1.296	1.1872		3.8819	2.2189	1.7775	1.2796	0.7309
11.664	6.8516	4.9585	1.3924	1.5593		1.4557	1.3574	1.3299	1.2773	1.3997		3.6714	2.1174	1.5137	1.0638	1.4386
11.722	6.5752	4.7621	1.3722	1.3715		1.548	1.3953	1.3568	1.2585	1.263		7.5523	1.8182	0.8366	0.63529	1.3889
9.5921	5.1366	3.7155	1.2914	1.3111		1.403	1.2671	1.23	1.1835	1.2113		1.5797	1.0742	0.84627	0.63529	1.5077
9.3443	5.0312	3.5739	1.1905	1.3071		1.3589	1.2088	1.1591	1.0899	1.1927		3.617	2.3744	1.9327	1.4964	1.218
6.7556	3.4579	2.5209	1.352	1.4394		1.5756	1.316	1.2238	1.1051	1.1685		3.8842	1.9504	1.5283	1.2546	1.3221
7.3634	3.7135	2.6627	1.2914	1.1298		1.4673	1.2878	1.216	1.0552	0.90859		3.7776	1.9034	1.3935	1.0739	0.99085
8.2872	4.1006	2.8763	1.2914	1.1455		1.5596	1.355	1.2761	1.0552	0.93953		5.9608	2.6095	1.3807	0.80369	0.9862
7.8026	3.8485	2.7619	1.3924	1.1779		1.6712	1.3881	1.2989	1.1384	0.95674		5.3555	2.4234	1.5216	0.98368	0.56443
8.1273	3.9766	2.7882	1.2511	1.1932		1.6751	1.42	1.3064	1.022	0.95401		2.4594	1.1765	0.92697	0.80369	1.1605
6.8342	3.576	2.644	1.2309	1.3557		1.557	1.3186	1.2417	1.0054	1.0998		0.87401	0.63811	0.56893	0.44523	1.2925
7.9603	3.8954	2.7836	1.3924	1.1278		1.586	1.3432	1.2612	1.1384	0.91974		1.1333	1.3068	1.3579	1.4359	0.5341
7.6815	3.8019	2.7006	1.2107	1.2877		1.5173	1.3243	1.2377	0.98875	1.0593		2.1303	1.0896	0.80319	0.71388	1.2299
7.0084	3.6245	2.6484	1.2914	1.3835		1.4689	1.3129	1.2464	1.0552	1.1161		2.0935	1.3299	0.94555	0.71388	1.6459
7.6782	3.7607	2.6991	1.3924	1.3102		1.6003	1.348	1.2609	1.1384	1.081		2.569	1.9197	1.6387	1.3452	1.1129
6.8983	3.5867	2.6096	1.2712	1.5639		1.6309	1.3527	1.2534	1.0386	1.2635		2.3252	1.5652	1.3106	0.89362	1.3558
6.7528	3.5686	2.6813	1.4328	1.3323		1.52	1.3652	1.3146	1.1717	1.0864		2.8616	1.8444	1.482	1.2546	1.1218
7.2199	3.6913	2.667	1.4328	1.5792		1.6796	1.3763	1.2652	1.1717	1.2699		3.5197	2.3645	2.0046	1.7088	1.2696
8.9705	4.0883	2.7811	1.1299	1.2481		1.758	1.4084	1.2666	0.92235	1.0394		1.5899	0.8217	0.61213	0.35593	1.5425
7.2658	3.778	2.7736	1.3924	1.626		1.5345	1.3394	1.2783	1.1384	1.3193		2.0415	1.5058	1.2576	1.0739	1.3874
7.1473	3.684	2.6854	1.2511	1.1781		1.5145	1.3371	1.2642	1.022	0.96538		1.6332	0.96341	0.78699	0.71388	0.90098
7.9904	4.0287	2.9206	1.4934	1.3242		1.5334	1.3816	1.3329	1.2217	1.0765		3.8474	1.9846	1.5973	1.3452	0.66835
6.841	3.6485	2.7388	1.3924	1.6961		1.66	1.4614	1.3861	1.1384	1.3803		2.0701	1.3834	1.1805	1.0739	1.2174
8.8669	4.1786	2.9049	1.352	1.1244		1.6476	1.4004	1.3025	1.1051	0.9099		4.1118	1.8754	1.3787	1.0739	1.4007
6.1515	2.939	2.0855	1.1097	1.3019		1.1744	0.99969	0.94395	0.90576	1.043		2.4301	1.5194	1.333	1.2546	1.0642
5.4671	2.8312	2.057	1.0088	0.91319		1.1708	1.0034	0.94454	0.82288	0.73512		6.5174	2.7252	1.5836	0.71388	0.64384
4.6671	2.5055	1.878	1.0693	1.0837		1.0949	0.93657	0.89478	0.8726	0.86823		1.3357	1.2292	1.1787	1.0739	1.2841
6.3186	3.0306	2.1836	1.3116	1.2365		1.433	1.1054	1.027	1.0718	1.024		5.1019	2.4776	1.8676	1.3452	0.56838
4.76	2.5884	1.9726	1.0895	1.1865		1.173	1.0024	0.96612	0.88918	0.96958		4.7041	2.0696	1.4957	1.0739	1.0976
5.7238	2.7955	2.1095	1.3924	1.4639		1.3787	1.0733	1.0263	1.1384	1.1866		11.248	2.0721	1.4697	1.5267	1.3516
5.5419	2.9531	2.2554	1.2309	1.2436		1.2903	1.1445	1.1103	1.0054	1.0232		6.1717	2.343	1.4024	0.98368	1.2236
5.671	3.0124	2.2524	1.1501	1.2186		1.1978	1.0638	1.0378	0.93895	0.99908		3.9828	1.686	1.05	0.80369	1.049
4.9926	2.7143	2.086	1.1703	1.3433		1.2131	1.0748	1.0436	0.95554	1.0924		1.9835	1.4327	1.235	0.89362	0.99573
5.357	2.8637	2.1105	1.1501	1.3493		1.3327	1.0974	1.0169	0.93895	1.0778		2.0606	1.8166	1.639	1.3452	1.2814
5.4519	2.8155	2.0466	1.0693	0.96503		1.3161	1.074	0.98999	0.8726	0.77366		3.1151	1.8611	1.4834	1.0739	0.65677
5.5412	2.9733	2.218	1.1501	1.0726		1.264	1.105	1.0576	0.93895	0.8765		2.0191	1.3101	1.0123	0.6242	1.2638
6.9497	3.3603	2.398	1.2511	1.3062		1.4745	1.1934	1.1074	1.022	1.0654		13.75	4.9748	2.1095	0.89362	0.59076
7.037	3.2866	2.3245	1.2309	1.1322		1.3766	1.121	1.0511	1.0054	0.92933		2.5703	1.6723	1.4958	1.1642	1.2547
5.6336	2.8948	2.1909	1.1905	1.2428		1.5682	1.2197	1.1261	0.97215	1.009		2.445	1.5586	1.2603	0.80369	0.82809
5.3413	2.798	2.1063	1.1703	1.0479		1.2687	1.1004	1.0512	0.95554	0.84955		1.2723	0.85079	0.82597	0.98368	0.75414
6.1734	3.1816	2.3355	1.1905	1.1495		1.2951	1.1369	1.0881	0.97215	0.92613		5.1038	2.0232	1.1839	0.89362	1.3018
4.6544	2.7742	2.1784	1.1299	1.0759		1.2252	1.1234	1.0986	0.92235	0.86419		1.4896	1.0628	0.91481	0.6242	0.84948
5.2881	2.8312	2.1085	1.029	1.057		1.3473	1.1373	1.0607	0.83945	0.85084		2.9361	1.6337	1.2969	0.80369	0.88642
5.5763	2.9331	2.1743	1.0693	0.99247		1.3858	1.1428	1.0617	0.8726	0.80942		1.8697	1.1221	0.93457	0.71388	0.87276
4.983	2.6917	2.0519	1.0895	1.2937		1.2752	1.1065	1.0491	0.88918	1.0637		1.3252	0.76614	0.68003	0.6242	0.80244
5.552	3.0135	2.2828	1.2107	1.2254		1.58	1.2739	1.1731	0.98875	1.0005		2.7751	1.8231	1.4992	1.0739	1.1549
6.2657	3.05	2.2234	1.029	1.041		1.3859	1.1348	1.0555	0.83945	0.85893		1.2498	0.78889	0.64145	0.53465	1.0333
5.3176	2.8703	2.1954	1.2511	1.1538		1.3253	1.1183	1.0703	1.022	0.9299		2.5885	1.4898	1.1867	0.98368	0.83219
5.5358	2.8379	2.0943	1.029	0.79546		1.2765	1.0735	1.0076	0.83945	0.6421		0.73557	0.56897	0.52424	0.44523	0.81605
4.8564	2.7884	2.1596	1.3116	1.2319		1.364	1.1935	1.1295	1.0718	0.99336		2.7063	2.23	2.0355	1.6177	1.0927
6.1868	3.1487	2.3525	1.2309	1.6254		1.5822	1.2575	1.1685	1.0054	1.3177		1.6461	1.1207	0.92561	0.71388	1.8207
6.0007	3.1096	2.2806	1.2511	1.3167		1.3043	1.1304	1.0743	1.022	1.077		3.3648	2.5255	1.9932	1.2546	1.1594
7.259	3.5052	2.488	1.2712	1.1598		1.2634	1.1133	1.0733	1.0386	0.93294		5.2071	2.1763	1.4142	1.0739	0.73206
7.2533	3.6571	2.5661	1.1703	1.0458		1.3678	1.1851	1.1158	0.95554	0.85441		2.6874	1.6335	1.3129	0.98368	1.3857
5.5342	2.9751	2.2541	1.3318	1.4382		1.538	1.2393	1.1464	1.0885	1.1718		2.9972	1.9007	1.5871	1.2546	1.0062
6.6942	3.1996	2.2751	1.2309	1.3171		1.2914	1.1102	1.0491	1.0054	1.0633		2.159	1.5262	1.2494	1.0739	0.71717
5.9482	3.0056	2.2167	1.2107	1.1035		1.3143	1.1268	1.0699	0.98875	0.88707		2.7	1.6739	1.3728	0.98368	0.7362
5.7171	2.9887	2.2101	1.1299	1.1884		1.2995	1.1328	1.0757	0.92235	0.9803		1.8821	1.1514	0.96366	0.71388	0.5104
6.9275	3.5741	2.569	1.2712	1.2184		1.4462	1.2334	1.1588	1.0386	1.0122		6.3694	4.1822	2.6266	1.3452	0.77881
5.9651	3.173	2.3515	1.1905	1.222		1.457	1.2347	1.1493	0.97215	1.0016		1.0045	0.95781	0.90034	0.80369	1.1251
5.275	2.8839	2.2197	1.2511	1.2417		1.4442	1.219	1.1473	1.022	1.021		2.4133	1.5143	1.2781	1.0739	0.72904
6.0563	3.1187	2.3591	1.352	1.2931		1.5279	1.2873	1.2138	1.1051	1.0368		4.8049	2.518	1.9864	1.3452	0.72325
6.2285	3.1864	2.3715	1.2914	1.3145		1.5368	1.2744	1.192	1.0552	1.0542		3.2651	1.9768	1.5824	0.98368	1.0865
6.526	3.3744	2.4942	1.352	1.1535		1.4571	1.2493	1.184	1.1051	0.92542		2.845	2.3281	1.9759	1.4359	1.0177
5.2623	2.9272	2.2181	1.1299	1.2977		1.4509	1.2303	1.1462	0.92235	1.0585		2.8008	1.8403	1.5178	0.89362	0.91069
6.2223	3.2036	2.3654	1.3318	1.4374		1.4245	1.2225	1.1523	1.0885	1.1807		2.8734	1.8176	1.4089	1.1642	1.0087
7.4037	3.763	2.6644	1.2309	1.2639		1.4393	1.2603	1.1813	1.0054	1.0197		0.0022665	0.21891	0.5436	0.89362	0.81264
5.5543	3.1084	2.3455	1.1905	0.9969		1.4584	1.2438	1.1695	0.97215	0.80475		2.4605	1.6971	1.4054	0.89362	0.89324
5.841	3.1822	2.4307	1.352	1.3242		1.3917	1.2235	1.184	1.1051	1.0846		3.1955	1.7847	1.4257	0.98368	1.4788
6.706	3.2636	2.3543	1.2309	1.2844		1.4384	1.2087	1.1335	1.0054	1.0374		4.7433	2.1873	1.585	1.2546	1.1435
7.2796	3.6821	2.619	1.3722	1.5869		1.4199	1.2404	1.1761	1.1218	1.2952		8.7167	3.2275	2.0389	1.7088	0.99818
7.156	3.5869	2.5775	1.3116	1.1796		1.5416	1.2748	1.1946	1.0718	0.96146		3.9805	2.3532	1.8058	1.2546	0.78163
6.4414	3.3288	2.499	1.4934	1.6442		1.5199	1.3021	1.2341	1.2217	1.3241		2.0525	1.7319	1.6554	1.7088	1.1415
6.2281	3.2121	2.376	1.2511	1.145		1.4318	1.228	1.1579	1.022	0.94424		1.7733	1.378	1.1804	0.89362	1.0316
6.5915	3.4618	2.4945	1.1299	1.121		1.3758	1.2133	1.1381	0.92235	0.91008		1.9258	1.1927	0.98581	0.80369	0.89486
5.5652	3.0238	2.2164	1.0492	0.92274		1.4042	1.1891	1.0975	0.85602	0.74003		2.7061	1.6308	1.2944	0.80369	0.47326
4.9053	2.55	1.921	1.1299	1.0351		1.2595	1.0442	0.98196	0.92235	0.83911		2.1734	1.4962	1.2809	1.0739	1.2382
6.0454	3.1901	2.3656	1.3116	1.2118		1.6034	1.3159	1.2148	1.0718	0.98488		2.5517	1.9437	1.7046	1.2546	1.3612
5.2647	2.6447	1.9557	1.1501	0.86819		1.1776	0.98767	0.94009	0.93895	0.71957		2.942	2.0003	1.7498	1.4359	0.75679
5.1711	2.7059	2.022	1.0693	0.84489		1.3042	1.0819	1.006	0.8726	0.69492		3.3156	1.915	1.5124	1.0739	1.1986
4.467	2.398	1.817	1.029	1.2804		1.2427	1.011	0.93855	0.83945	1.0459		2.3622	1.5639	1.3215	0.89362	0.53118
5.7062	2.8097	2.1073	1.2914	1.2789		1.6048	1.1603	1.0695	1.0552	1.0538		5.1489	1.9096	1.3166	1.0739	1.6484
6.6529	3.0629	2.1895	1.2511	1.2494		1.5291	1.1608	1.0705	1.022	1.0293		4.0303	2.1272	1.5386	0.89362	1.2191
7.1475	3.3121	2.2953	1.2712	1.1187		1.5807	1.2038	1.0831	1.0386	0.91838		3.2909	1.8008	1.5189	1.1642	0.95227
7.4274	3.7772	2.7487	1.4934	1.5241		1.5257	1.346	1.2831	1.2217	1.2571		7.6036	5.0108	3.3993	1.7088	1.564
6.3093	3.176	2.2943	1.1703	1.2618		1.3963	1.1186	1.0481	0.95554	1.0333		1.1756	0.89113	0.88282	0.89362	0.9051
6.5279	3.4066	2.568	1.3318	1.3229		1.609	1.3395	1.2764	1.0885	1.0928		1.7414	1.0426	0.87094	0.71388	0.93621
6.66	3.5103	2.6659	1.554	1.444		1.7164	1.4048	1.3322	1.2717	1.1985		5.2606	2.6539	1.7919	1.2546	2.0305
6.0083	3.2725	2.4719	1.3722	1.1541		1.3592	1.2274	1.1932	1.1218	0.94727		3.3271	1.8019	1.3621	1.1642	1.3481
5.9924	3.2676	2.4851	1.3116	1.2041		1.2967	1.2006	1.1778	1.0718	0.97328		2.7386	1.4335	1.0507	0.89362	0.85492
6.7572	3.3568	2.3563	1.3116	1.3975		1.6031	1.2133	1.0936	1.0718	1.136		2.5678	2.1114	1.7308	1.1642	1.3698
6.562	3.3104	2.4337	1.2914	1.4349		1.5942	1.2665	1.1845	1.0552	1.1676		2.2639	1.0122	0.65291	0.6242	1.0143
5.8181	2.9004	2.1407	1.1905	0.97247		1.5135	1.1794	1.0847	0.97215	0.79002		4.0502	2.3877	1.7498	0.89362	0.78778
4.9339	2.5855	1.8913	0.96841	0.83334		1.1604	0.95649	0.89148	0.78976	0.68037		4.0501	2.4574	1.7899	1.1642	0.37052
5.6994	2.7806	2.0035	1.0895	1.2067		1.1909	0.96744	0.91535	0.88918	0.97764		1.27	0.68661	0.62315	0.6242	1.3774
4.8092	2.4886	1.909	1.2712	1.0455		1.1289	0.95269	0.93047	1.0386	0.84946		3.9269	2.4017	1.9045	1.3452	0.89076
4.9682	2.5382	1.8833	1.1299	1.2502		1.1994	0.96563	0.91494	0.92235	1.014		2.5299	1.78	1.5334	1.0739	0.96327
5.1913	2.5157	1.869	1.0492	0.90374		1.5959	1.0995	0.98238	0.85602	0.74014		2.9462	1.1864	0.76142	0.53465	0.73447
6.3485	3.1477	2.2516	1.2511	1.2922		1.3563	1.1219	1.0516	1.022	1.049		2.9666	1.4692	1.2306	0.98368	0.8869
4.4003	2.2554	1.7306	1.1097	1.1719		1.2343	0.96331	0.90394	0.90576	0.94872		6.6067	2.5166	1.6748	1.1642	1.2075
5.9484	2.7039	1.8844	0.9886	0.92997		1.1207	0.89095	0.83161	0.80632	0.7472		1.6864	0.78941	0.54367	0.53465	0.67161
6.4934	3.1623	2.227	1.1501	1.1625		1.2283	1.0237	0.96787	0.93895	0.94504		27.101	7.0204	2.1551	0.71388	0.95936
6.9787	3.042	2.1018	1.1501	1.2993		1.5592	1.1367	1.0115	0.93895	1.0592		10.124	7.2687	4.4704	1.1642	0.9997
6.9288	3.1687	2.2328	1.1703	1.223		1.8431	1.289	1.1297	0.95554	0.9856		4.4725	1.937	1.1019	0.71388	1.0912
4.6613	2.4986	1.9022	0.96841	0.89909		1.2361	1.017	0.95643	0.78976	0.7199		2.4755	1.0214	0.73678	0.53465	0.55617
6.1612	2.8552	2.0808	1.1905	1.4993		1.7938	1.168	1.0374	0.97215	1.2382		3.7783	2.2776	1.5569	0.80369	0.62892
5.8703	2.928	2.094	1.1905	1.1034		1.6287	1.1627	1.0342	0.97215	0.89483		2.9071	1.8871	1.5182	1.0739	0.87454
7.4364	3.2844	2.2798	1.2511	1.4476		1.8132	1.1918	1.0594	1.022	1.1848		5.2651	3.4542	2.2772	1.2546	0.85276
4.9824	2.4145	1.808	1.0693	0.96103		1.2646	0.93308	0.88107	0.8726	0.76376		3.958	2.223	1.4779	0.80369	0.86811
5.3317	2.7138	1.9802	1.1299	1.163		1.5259	1.0803	0.96959	0.92235	0.94481		5.8939	3.6192	2.0041	1.2546	1.595
5.0641	2.5887	1.8727	1.0693	1.1534		1.2309	0.9232	0.85631	0.8726	0.95008		5.6831	3.6679	2.4152	1.0739	1.0675
5.692	2.6851	1.9674	1.1501	1.0496		1.6548	1.1177	0.99638	0.93895	0.85348		2.3048	1.2593	1.0519	0.98368	0.55571
7.0612	3.4071	2.3698	1.2511	1.0685		1.5708	1.168	1.0605	1.022	0.88039		7.2878	5.0151	2.5252	0.80369	1.0659
6.0761	2.9968	2.1247	1.1501	1.2868		1.6844	1.1852	1.0407	0.93895	1.038		2.587	1.6322	1.2906	0.98368	0.86117
6.6653	3.039	2.0907	1.1299	1.0145		2.0893	1.3102	1.0848	0.92235	0.82403		9.1296	5.8822	4.0109	1.0739	1.1922
5.1922	2.5075	1.7802	1.0088	0.93339		1.7093	1.0966	0.9259	0.82288	0.76214		2.9307	1.7965	1.3784	0.71388	0.68141
4.9042	2.5229	1.8478	1.1299	1.0438		1.5303	1.1191	0.97959	0.92235	0.86357		2.3843	1.4623	1.2368	1.0739	0.86148
5.4413	2.6674	1.888	0.9886	0.94223		1.3884	1.0087	0.89912	0.80632	0.75855		0.73824	0.52466	0.51868	0.6242	0.70675
6.0187	3.0055	2.2129	1.2107	1.1501		1.5462	1.1887	1.0925	0.98875	0.93119		2.2585	1.3217	1.0104	0.6242	1.2884
5.5613	2.8359	2.1187	1.352	1.3214		1.3385	1.0928	1.0344	1.1051	1.0731		2.9659	2.1557	1.7825	1.3452	0.89853
6.9639	3.5365	2.5232	1.3116	1.7527		1.6797	1.316	1.1935	1.0718	1.4061		3.5759	2.1881	1.4656	0.89362	1.2533
4.1254	2.4005	1.8804	1.1501	1.0581		1.1374	0.98941	0.95536	0.93895	0.85446		3.5384	2.5225	2.1213	1.3452	0.75289
7.9473	4.058	2.9618	1.6146	1.7335		1.7134	1.4735	1.3938	1.3218	1.4184		3.5977	2.6039	2.2828	1.8914	1.1927
8.1285	4.0717	2.951	1.453	1.2754		1.7738	1.4928	1.3969	1.1884	1.054		1.7656	1.2838	1.179	1.0739	0.44341
8.4269	4.1355	2.9505	1.3924	1.4548		1.7444	1.4883	1.3826	1.1384	1.1797		6.3495	2.3753	1.3583	0.98368	1.2525
6.9027	3.764	2.8592	1.453	1.6175		1.7648	1.5225	1.4475	1.1884	1.3059		1.6922	0.9365	0.71816	0.53465	1.363
6.8729	3.6795	2.7842	1.4732	1.4871		1.7463	1.4933	1.4128	1.205	1.2455		1.9399	1.5176	1.3338	0.98368	1.1735
8.8988	4.2436	2.9982	1.3924	1.4024		1.8259	1.5318	1.4113	1.1384	1.1452		3.2974	1.6894	1.2736	0.89362	0.98308
8.2147	4.1375	3.0419	1.4328	1.4838		1.9053	1.5993	1.4942	1.1717	1.1943		1.453	1.0303	0.87648	0.71388	1.3061
3.58	2.0116	1.5697	0.90786	0.89413		0.86382	0.7856	0.77909	0.74011	0.73931		1.366	0.92712	0.80362	0.6242	0.28634
4.1522	2.2324	1.6814	0.88768	0.92352		1.0753	0.90119	0.84405	0.72357	0.75237		1.4829	1.1269	0.99496	0.71388	1.135
5.3024	2.4069	1.6801	0.9886	1.2303		1.6144	0.97139	0.82744	0.80632	0.99519		3.6299	2.0297	1.4129	0.98368	1.6873
9.5039	4.2209	2.6788	1.1097	1.0553		1.399	1.1999	1.1216	0.90909	0.86322		2.3175	1.5779	0.91536	0.56013	1.6806
9.4314	3.6669	2.3585	1.2107	1.2533		1.5349	1.1907	1.0853	0.99243	1.015		4.2246	2.2236	1.532	1.1256	0.90318
8.553	3.7762	2.4663	1.3318	1.1942		1.5509	1.2374	1.1364	1.0926	0.97994		4.8746	2.8829	2.0977	1.1256	0.97529
9.0183	3.9111	2.4745	1.0895	1.1966		1.6285	1.2562	1.1144	0.89244	0.96365		2.1936	1.6299	1.2181	0.56013	0.87855
7.1206	3.2384	2.2393	1.1703	1.1436		1.5069	1.2087	1.1123	0.95908	0.92282		3.9606	2.3307	1.6964	0.93651	1.0245
7.3882	3.3126	2.2511	1.1299	0.97603		1.4607	1.1788	1.0842	0.92575	0.7953		5.0349	3.2726	2.0842	1.031	0.15829
7.3346	3.1784	2.15	1.2107	1.3625		1.7415	1.2716	1.1285	0.99243	1.1111		3.8688	1.9652	1.4204	0.84219	0.66782
8.1338	3.588	2.3467	1.3318	1.1463		1.6258	1.2613	1.1345	1.0926	0.93299		3.5797	2.4893	1.8301	1.031	0.71036
7.7073	3.486	2.3447	1.2107	1.3924		1.4318	1.1884	1.1069	0.99243	1.1429		1.3264	1.0109	0.84963	0.654	1.0546
8.0889	3.7747	2.5196	1.1905	1.2323		1.5487	1.2756	1.1624	0.97575	0.98088		5.3927	2.7857	1.8341	1.1256	0.80735
8.9221	3.8557	2.5731	1.352	1.2761		1.6293	1.278	1.1864	1.1093	1.0434		5.1723	3.2125	2.0932	1.2204	1.0249
7.7492	3.4573	2.4314	1.3722	1.5547		1.6227	1.2787	1.1929	1.126	1.2846		6.8826	3.3207	2.0584	1.3153	1.2458
8.1289	3.8362	2.6056	1.1905	0.9582		1.5379	1.2675	1.1807	0.97575	0.78501		1.5436	0.83571	0.64205	0.56013	0.40019
9.1559	4.2016	2.7901	1.2712	1.1935		1.6696	1.3512	1.244	1.0425	0.97126		3.1273	2.0225	1.4791	0.93651	0.52669
7.2476	3.294	2.3097	1.2511	1.0928		1.5562	1.2286	1.1379	1.0258	0.89347		3.4778	1.9315	1.3198	0.93651	1.2158
8.7286	3.6983	2.4715	1.352	1.5059		1.7315	1.3169	1.1886	1.1093	1.2324		5.2367	3.2544	2.1637	1.4104	1.4959
9.9744	4.2241	2.7077	1.2914	1.5442		1.6244	1.2809	1.1672	1.0592	1.2739		2.4193	1.4703	1.1882	1.1256	1.3037
8.4187	3.9324	2.705	1.2712	1.4075		1.6829	1.3302	1.2393	1.0425	1.1452		3.4064	2.131	1.5758	0.93651	1.4698
7.4712	3.6165	2.5302	1.2914	1.1877		1.43	1.2262	1.1656	1.0592	0.97692		1.813	1.3781	1.1147	0.74802	1.3233
8.2378	3.7285	2.5413	1.3318	1.195		1.6704	1.3365	1.2405	1.0926	0.97689		3.248	1.976	1.4367	0.84219	0.59339
7.811	3.7435	2.5055	1.3318	1.4001		1.4081	1.1984	1.1157	1.0926	1.1375		3.6076	2.5191	2.0085	1.4104	0.9197
11.707	4.9864	3.1296	1.4126	1.4807		1.9457	1.5136	1.3467	1.1595	1.1839		2.6511	1.9872	1.7192	1.4104	1.0304
8.6867	3.7174	2.544	1.3924	1.8069		1.8672	1.4277	1.2958	1.1427	1.4787		2.0757	1.4907	1.1499	0.93651	1.6515
7.2668	3.6325	2.5245	1.3116	1.3743		1.4167	1.2254	1.1486	1.0759	1.1172		4.2027	2.5859	2.0199	1.6965	1.4099
6.7538	3.3444	2.3412	1.3318	1.1148		1.2687	1.1362	1.0926	1.0926	0.90978		3.2609	2.0331	1.7021	1.4104	0.81495
5.7449	2.9556	2.192	1.1501	1.2978		1.4443	1.2202	1.1543	0.94241	1.0533		2.4922	1.2271	0.90171	0.56013	1.0218
7.4833	3.3845	2.2898	1.1703	1.3162		1.6196	1.2469	1.1193	0.95908	1.075		2.5491	1.3472	1.071	0.84219	1.2576
7.6135	3.6933	2.4381	1.1905	1.1367		1.4128	1.1871	1.0948	0.97575	0.92958		3.9564	2.362	1.8145	1.031	1.1081
7.1149	3.4597	2.3664	1.3116	1.2933		1.4664	1.1797	1.0841	1.0759	1.0599		4.4355	2.9038	2.417	1.7922	1.513
7.0239	3.4359	2.3632	1.3116	1.4012		1.4875	1.2325	1.1366	1.0759	1.148		7.6651	4.8106	3.7057	1.7922	1.1068
8.5524	3.7091	2.3838	1.1501	1.1221		1.4403	1.1502	1.051	0.94241	0.91247		6.005	2.9183	1.9717	1.1256	1.0169
6.5871	3.1621	2.2085	1.2914	1.4762		1.2366	1.0692	1.0258	1.0592	1.2112		4.0816	2.9169	2.2827	1.5056	1.267
8.0412	3.5006	2.2953	1.3116	1.3081		1.4792	1.1884	1.0924	1.0759	1.0816		7.4869	4.9933	3.1452	1.601	1.0194
9.3586	4.3209	2.7543	1.0693	1.038		1.4773	1.2186	1.1167	0.87579	0.84876		1.6792	1.1223	0.86425	0.654	0.88949
7.0975	3.3539	2.2322	1.2309	1.0801		1.3155	1.1083	1.0208	1.0091	0.88867		6.4203	3.1489	2.2006	1.601	0.58827
7.5431	3.2889	2.1706	1.0895	1.1437		1.5157	1.1773	1.0613	0.89244	0.93945		3.925	1.8643	1.1395	0.56013	0.89939
7.4579	3.5742	2.37	1.0492	1.1462		1.3944	1.145	1.0458	0.85914	0.92888		4.442	2.8377	1.9253	0.93651	0.55797
8.3911	3.6888	2.3791	1.2914	1.3097		1.5682	1.2203	1.1037	1.0592	1.0686		3.4622	2.4699	1.95	1.031	1.2691
9.6807	4.3921	2.7604	1.2309	0.82164		1.5575	1.2928	1.1683	1.0091	0.67685		6.0669	4.1968	2.959	1.2204	0.58249
6.6137	3.0764	2.1404	1.0895	1.0489		1.7342	1.3361	1.1816	0.89244	0.85392		2.0688	1.4516	1.1563	0.74802	0.68007
8.2043	3.8569	2.6037	1.1097	1.0104		1.5085	1.2995	1.2046	0.90909	0.82282		0.91045	0.53254	0.49913	0.56013	0.78918
7.4975	3.2926	2.2021	1.2107	1.0955		1.4508	1.13	1.0331	0.99243	0.89255		6.1143	2.712	1.5043	0.93651	0.88164
5.8555	2.7308	1.9752	1.1501	1.273		1.3605	1.0732	1.0052	0.94241	1.0315		2.2975	1.5073	1.2875	1.031	0.71683
5.8164	2.7961	2.0564	1.1501	1.013		1.5144	1.1942	1.1057	0.94241	0.821		4.2319	2.2508	1.6225	1.031	0.82751
7.1027	3.3206	2.3626	1.2914	1.4515		1.3255	1.1025	1.0754	1.0592	1.1855		2.9391	1.8205	1.2892	1.031	1.0874
6.3276	3.0028	2.1667	1.1905	0.92058		1.4997	1.2038	1.123	0.97575	0.74954		2.6236	1.3309	1.0028	0.74802	1.0813
6.2871	2.8747	2.147	1.3318	1.6104		1.9028	1.439	1.2909	1.0926	1.3198		3.8917	2.2492	1.334	1.1256	1.8504
5.4629	2.6978	2.027	1.2309	1.0864		1.6049	1.2831	1.1807	1.0091	0.88179		2.4324	1.9624	1.7297	1.2204	0.96203
7.2976	3.1802	2.1999	1.2107	1.2762		1.405	1.1269	1.0492	0.99243	1.0414		7.0352	2.5647	1.4497	1.1256	1.1698
10.97	4.4861	2.8868	1.3116	1.3929		1.8027	1.4034	1.2927	1.0759	1.1322		7.1712	5.422	3.1634	0.74802	1.517
7.6441	3.3479	2.1896	1.1905	1.2487		1.6602	1.2841	1.1316	0.97575	1.008		5.8677	2.6562	1.7187	0.93651	0.76753
6.8529	2.9264	2.0281	1.3318	1.3039		1.4269	1.1228	1.0361	1.0926	1.0787		5.2011	3.6839	2.8122	1.984	0.70572
6.7421	2.8561	1.9407	1.1299	1.1546		1.3351	1.0443	0.9668	0.92575	0.95168		2.2239	1.3973	1.1447	0.93651	0.82745
7.2311	2.9479	1.9268	1.0492	0.9218		1.2748	0.99983	0.91496	0.85914	0.74585		1.5318	1.3017	0.9621	0.56013	0.49322
5.8423	2.705	1.8524	1.0895	1.2505		1.3242	1.0561	0.96469	0.89244	1.0039		3.6039	1.8638	1.2934	0.74802	0.9017
8.6133	3.3175	2.0693	1.029	1.3748		1.5268	1.1139	0.96816	0.8425	1.1191		5.2441	2.7765	1.8529	0.93651	1.3453
7.1542	3.1165	2.0172	0.9886	0.72967		1.3529	1.0449	0.94131	0.80924	0.59625		1.5508	0.95801	0.73311	0.4664	0.7311
5.8671	2.8654	2.0797	1.1703	1.0409		1.1357	1.0225	1.0111	0.95908	0.85258		5.9862	1.8537	0.98964	0.654	0.80301
7.8624	3.2923	2.0462	0.92804	0.9895		1.2641	1.0085	0.90805	0.75937	0.81477		2.269	1.5152	1.0506	0.654	0.85406
6.667	2.9168	1.9856	1.0088	0.96949		1.182	0.97915	0.91704	0.82587	0.79379		6.6733	2.7093	1.6019	1.031	1.1811
4.9992	2.5826	1.8906	1.029	1.1087		1.1961	1.0205	0.96681	0.8425	0.90052		4.2593	2.0392	1.3859	0.84219	0.77226
5.5918	2.8131	2.0514	1.0895	1.0093		1.1487	0.98732	0.96402	0.89244	0.82471		2.8138	1.2418	0.86499	0.654	0.52518
6.2588	2.8287	2.0251	1.2107	1.1493		1.3588	1.1168	1.0528	0.99243	0.93468		4.3168	2.1071	1.4264	1.1256	0.94863
5.1995	2.6105	1.9129	1.1299	1.2299		1.5387	1.2249	1.1164	0.92575	1.0086		1.9366	1.2727	0.99568	0.74802	0.80603
7.5555	3.1116	2.0351	0.9886	1.0259		1.3494	1.0331	0.93577	0.80924	0.83324		2.5713	1.431	1.0197	0.74802	0.85422
5.6869	2.4733	1.7148	1.1097	1.1435		1.3922	1.0194	0.91963	0.90909	0.91901		2.916	1.4921	1.3106	1.3153	0.51356
7.7552	3.1375	1.9767	0.96841	0.87427		1.2464	0.97186	0.87663	0.79261	0.70675		4.8521	2.3181	1.4651	0.74802	0.78906
8.3342	3.5017	2.2322	1.029	0.86848		1.4122	1.1229	1.0173	0.8425	0.70802		4.4258	3.0654	2.0299	0.84219	0.32575
8.0601	3.5977	2.3496	1.3318	1.3209		1.5878	1.2347	1.1147	1.0926	1.082		4.4663	2.8782	2.3253	1.6965	1.027
6.7443	3.1458	2.2224	1.1703	1.1027		1.5099	1.2284	1.1361	0.95908	0.89337		3.6485	1.6507	1.0047	0.74802	0.93347
8.0935	3.3594	2.3115	1.2309	1.3786		1.7916	1.3195	1.184	1.0091	1.1342		1.6072	1.2456	1.0999	0.93651	0.69837
6.7607	3.1731	2.2883	1.2914	1.5656		1.6927	1.316	1.205	1.0592	1.2641		2.4492	1.6494	1.4253	1.3153	1.3154
6.8106	3.2241	2.3491	1.2712	1.3529		1.5564	1.2834	1.2127	1.0425	1.0906		2.4408	1.6322	1.2904	0.93651	0.79159
7.6562	3.0325	1.9989	1.029	1.1442		1.6711	1.1636	1.0183	0.8425	0.93258		2.7937	1.3894	0.9609	0.56013	1.2166
6.3404	2.83	1.9111	1.0088	1.0242		1.21	0.95607	0.89296	0.82587	0.82925		1.3888	0.56976	0.48826	0.56013	0.87301
8.8407	4.2416	2.7544	1.2511	1.2796		1.5191	1.2867	1.1853	1.0258	1.0432		4.2399	2.3079	1.6312	1.1256	0.96858
7.4479	3.3486	2.2543	1.1501	0.84022		1.4327	1.1233	1.027	0.94241	0.69606		1.5541	1.267	1.142	0.93651	0.71057
10.879	4.653	2.7799	0.94823	1.2294		1.6308	1.2549	1.094	0.77599	1.0082		3.0245	2.4062	1.5616	0.74802	0.93544
9.3019	4.1137	2.6242	1.0895	1.2108		1.6314	1.2969	1.1529	0.89244	0.98864		3.481	2.2829	1.4427	0.654	1.2065
9.6504	4.1136	2.7021	1.3722	1.3092		1.8516	1.4433	1.3025	1.126	1.0695		3.8906	2.1731	1.5752	1.1256	1.2472
10.009	4.5205	3.0159	1.3924	1.4562		1.7095	1.4466	1.3538	1.1427	1.1938		3.1205	1.7772	1.0964	0.74802	1.5564
9.7531	4.4916	3.0276	1.3722	1.3445		1.7608	1.4567	1.3584	1.126	1.1021		4.7472	2.2837	1.5309	1.031	1.1439
10.676	4.7967	3.0951	1.453	1.2235		1.9207	1.5298	1.3742	1.1929	0.98924		3.5991	1.696	1.3849	1.2204	1.0383
10.429	4.9404	3.2161	1.4732	1.6613		1.7152	1.4249	1.331	1.2097	1.3522		7.7683	5.1972	3.6228	1.601	1.3704
9.1707	4.4732	2.989	1.3722	1.3908		1.5571	1.3697	1.2999	1.126	1.141		2.9821	1.9396	1.5088	0.93651	2.0566
8.8276	4.4452	2.9981	1.4732	1.665		1.6484	1.4132	1.317	1.2097	1.3603		4.1365	3.0452	2.4397	1.7922	1.3279
8.9228	4.1458	2.7248	1.1905	1.4456		1.602	1.3259	1.2057	0.97575	1.1889		4.0994	2.2316	1.6107	1.1256	1.4869
5.8489	2.513	1.7794	1.029	0.98005		1.2687	0.99679	0.924	0.8425	0.78818		3.3028	1.8596	1.3505	0.84219	0.50743
5.6788	2.7035	1.9208	1.0492	1.2754		1.1086	0.97514	0.93687	0.85914	1.0487		4.5316	2.7164	1.8198	1.1256	0.66524
5.991	2.6515	1.8419	0.94823	0.88048		1.1524	0.95731	0.90555	0.77599	0.71003		3.0529	1.6791	1.0497	0.654	0.81441
7.1057	2.7622	1.7184	0.84731	0.97123		1.3496	0.94678	0.81537	0.69295	0.78091		2.7208	1.5042	0.96314	0.74802	0.62962
5.4393	2.398	1.6503	0.94823	0.88657		1.4759	1.0942	0.96167	0.77599	0.71805		1.9603	0.99251	0.72014	0.4664	0.44532
5.7364	2.4373	1.6436	0.7464	0.69089		1.1294	0.86391	0.78039	0.61003	0.56535		1.9909	1.385	0.86568	0.4664	0.64266
5.4026	2.3563	1.7044	1.0088	1.0746		1.3986	1.0495	0.9611	0.82587	0.87191		3.1364	1.7023	1.2902	0.84219	0.74323
5.2467	2.6336	1.8803	1.0895	1.1787		1.242	1.0209	0.94933	0.89244	0.95342		2.6733	1.7856	1.4342	0.93651	1.0053
5.1339	2.4136	1.7183	0.96841	1.1132		0.95605	0.81877	0.79655	0.79261	0.90524		4.7844	1.9591	1.076	0.74802	1.1041
6.5325	2.8354	1.8823	1.0693	1.1032		1.2334	0.94869	0.87113	0.87579	0.89352		6.0712	3.2445	1.5328	0.93651	1.0189
10.478	4.665	2.9242	1.3722	1.264		1.8543	1.4709	1.3035	1.126	1.0314		3.7336	2.5172	1.9083	1.1256	0.7523
6.8588	2.9379	2.023	1.1905	1.2479		1.5961	1.1946	1.073	0.97575	1.0144		1.9877	1.6208	1.4113	1.031	1.1249
8.8633	3.9376	2.6835	1.4934	1.3756		1.7612	1.3898	1.2875	1.2264	1.1231		3.3853	2.3993	1.8765	1.3153	0.74449
8.3891	4.0511	2.8256	1.4126	1.3078		1.7715	1.4739	1.3746	1.1595	1.0687		6.17	3.495	2.1089	1.1256	0.809
7.6782	3.6375	2.6245	1.2914	1.48		1.762	1.4435	1.3479	1.0592	1.204		1.4727	0.94478	0.69802	0.4664	1.2391
11.089	5.0483	3.3074	1.4732	1.706		1.9405	1.6347	1.4792	1.2097	1.3915		6.5472	3.8775	2.9265	2.0801	1.2673
8.545	3.9524	2.658	1.453	1.37		1.6497	1.3037	1.2012	1.1929	1.1153		4.0774	2.6416	2.0735	1.601	1.3333
6.2061	3.1169	2.2862	1.352	1.3246		1.6007	1.3082	1.2177	1.1093	1.0895		4.9468	2.8579	2.1305	1.3153	1.0132
8.4507	3.732	2.5175	1.1905	1.2172		1.6896	1.3537	1.243	0.97575	0.99191		2.3567	1.2999	0.89744	0.56013	1.0494
9.8212	4.4967	3.0219	1.4934	1.3892		1.8421	1.5195	1.4175	1.2264	1.1307		3.7161	2.6732	1.7105	0.654	1.4333
9.7205	4.2254	2.8488	1.5136	1.5199		1.7853	1.4993	1.3954	1.2432	1.2532		1.7532	1.7767	1.4836	1.1256	1.1398
9.9729	4.5017	2.9512	1.3116	1.2125		1.695	1.3928	1.2934	1.0759	0.98518		2.1177	1.6356	1.244	0.654	0.89716
9.8503	4.4312	2.8794	1.3116	1.2365		1.7501	1.4348	1.3112	1.0759	1.0053		4.3681	3.3305	1.8737	0.654	1.1967
8.5569	3.8295	2.5651	1.1097	1.169		1.6202	1.3126	1.1973	0.90909	0.96118		3.0834	1.3607	0.93488	0.74802	1.2718
8.4602	3.631	2.6002	1.4934	1.5544		2.0244	1.5541	1.4233	1.2264	1.2639		5.3719	2.1486	1.4026	1.1256	1.7424
10.126	4.6304	3.0222	1.352	1.2453		1.7299	1.4767	1.3614	1.1093	1.0323		5.4552	3.4485	2.1648	1.1256	1.2959
8.4543	3.7584	2.6421	1.4328	1.4909		1.8054	1.4753	1.3749	1.1762	1.2149		4.354	2.3541	1.6617	0.84219	1.5453
10.223	4.4467	2.8803	1.3722	1.4074		1.927	1.4724	1.3159	1.126	1.1364		2.4224	1.8979	1.5941	1.031	0.72098
9.6861	4.3619	2.8676	1.352	1.2581		1.991	1.5844	1.3996	1.1093	1.0335		3.102	2.1248	1.7036	1.1256	1.2355
10.521	4.4698	2.9212	1.352	1.5935		2.2467	1.7143	1.4986	1.1093	1.2946		3.2569	1.9931	1.5223	0.93651	1.5595
11.537	5.499	3.5712	1.3722	1.4231		1.9726	1.6669	1.52	1.126	1.1819		3.7607	2.2226	1.7702	1.3153	0.8153
13.448	6.3591	3.9958	1.554	1.3248		2.1695	1.8311	1.6508	1.2767	1.0636		8.5875	4.5787	2.546	1.2204	1.8354

## Sheet: F (longer space constants)
left (all KCs)						mid (same subtype)						right (calyx only)
50	95	223	447	Inf		50	95	223	447	Inf		50	95	223	447	Inf
1.809	1.3893	1.2273	1.1857	1.1501		1.0217	0.89242	0.85784	0.85224	0.84821		0.90444	0.79112	0.75476	0.75271	0.7555
1.9766	1.4723	1.3005	1.2615	1.2309		1.1149	0.95212	0.91345	0.90919	0.90783		0.83066	0.7072	0.68604	0.69606	0.71348
1.8186	1.4029	1.2602	1.2306	1.2107		1.0758	0.9265	0.89204	0.89036	0.89292		1.0757	0.96883	0.94904	0.95485	0.96571
1.7049	1.4045	1.2779	1.242	1.2107		0.99618	0.91901	0.90005	0.89615	0.89292		0.62499	0.59618	0.60503	0.61579	0.62945
1.8954	1.3665	1.1853	1.143	1.1097		1.1496	0.92523	0.84796	0.83091	0.81841		1.442	1.0396	0.93741	0.92612	0.92366
1.8999	1.4439	1.2733	1.2285	1.1905		1.1751	0.98506	0.91375	0.89458	0.87802		0.91062	0.77382	0.74752	0.7496	0.7555
1.8874	1.4372	1.2704	1.2346	1.2107		1.0375	0.91186	0.88498	0.88635	0.89292		0.89931	0.80929	0.80678	0.82043	0.83957
2.3185	1.614	1.3787	1.3281	1.2914		1.3795	1.0805	0.98332	0.9645	0.95254		1.7454	1.1623	0.91786	0.86943	0.83957
2.0149	1.43	1.2246	1.1733	1.1299		1.157	0.92593	0.8575	0.84369	0.83331		0.92046	0.70209	0.6344	0.62774	0.62945
1.6777	1.287	1.1571	1.1296	1.1097		0.98865	0.84361	0.81304	0.81334	0.81841		1.0002	0.88144	0.86227	0.86906	0.88161
1.7844	1.3247	1.1936	1.1756	1.1703		1.0276	0.86381	0.84172	0.84938	0.86311		1.0402	0.92035	0.90266	0.91066	0.92366
1.9513	1.454	1.2405	1.1809	1.1299		1.1861	0.98246	0.8877	0.85897	0.83331		1.1254	0.79623	0.66403	0.64114	0.62945
2.0317	1.5064	1.3067	1.2549	1.2107		1.1886	1.0054	0.93187	0.9114	0.89292		1.0789	0.87042	0.78909	0.7705	0.7555
1.9628	1.5222	1.3709	1.3371	1.3116		1.1581	1.0029	0.96838	0.96613	0.96745		0.91499	0.79996	0.83081	0.8563	0.88161
2.181	1.5677	1.3761	1.3379	1.3116		1.2988	1.0407	0.97546	0.96838	0.96745		1.0388	0.90499	0.87396	0.87566	0.88161
1.8446	1.31	1.121	1.0792	1.0492		1.0919	0.86921	0.79423	0.78077	0.77371		1.0433	0.87317	0.83269	0.83344	0.83957
2.0173	1.4992	1.3191	1.2722	1.2309		1.2253	1.003	0.93466	0.91965	0.90783		0.94831	0.73053	0.69152	0.69853	0.71348
1.9826	1.4308	1.235	1.1956	1.1703		1.0914	0.90829	0.86104	0.85889	0.86311		0.74166	0.70965	0.72718	0.74065	0.7555
2.3705	1.6357	1.3764	1.3314	1.3116		1.3852	1.0779	0.97717	0.96564	0.96745		0.99236	0.85566	0.81982	0.82571	0.83957
1.8502	1.4446	1.3171	1.2984	1.2914		1.093	0.94844	0.92732	0.93629	0.95254		1.1811	1.0507	1.0275	1.0358	1.0498
2.213	1.6259	1.394	1.3438	1.3116		1.3436	1.0964	0.9984	0.97849	0.96745		1.2978	1.0198	0.90495	0.8879	0.88161
1.9561	1.4502	1.273	1.2434	1.2309		1.1629	0.96311	0.9058	0.90257	0.90783		1.1182	0.98959	0.95682	0.95902	0.96571
1.8892	1.4287	1.2829	1.2601	1.2511		1.1463	0.95789	0.91378	0.91443	0.92273		1.0838	0.95142	0.9374	0.94917	0.96571
1.8436	1.3945	1.2414	1.2174	1.2107		1.1169	0.94106	0.88873	0.88607	0.89292		1.1444	1.0192	1.0148	1.0297	1.0498
1.8721	1.4349	1.2746	1.2451	1.2309		1.1299	0.96609	0.91209	0.90619	0.90783		1.0139	0.93868	0.91876	0.91965	0.92366
1.7422	1.4119	1.2784	1.2496	1.2309		0.98182	0.89929	0.88958	0.89628	0.90783		0.80555	0.75626	0.74657	0.74969	0.7555
2.1488	1.6048	1.4153	1.3843	1.3722		1.1824	1.0084	0.9816	0.99214	1.0122		0.93344	0.90354	0.9444	0.97417	1.0078
2.1549	1.5849	1.4011	1.3685	1.352		1.3288	1.0684	0.99809	0.99263	0.99727		1.27	1.0272	0.96365	0.96066	0.96571
1.8554	1.421	1.2894	1.2654	1.2511		1.1088	0.94066	0.91124	0.91425	0.92273		1.1066	0.91651	0.87054	0.87233	0.88161
1.953	1.4249	1.2435	1.2021	1.1703		1.1579	0.9425	0.87907	0.86858	0.86311		1.1494	0.89424	0.85149	0.86227	0.88161
2.1314	1.4917	1.2998	1.2601	1.2309		1.2837	0.9969	0.92327	0.91272	0.90783		1.3469	1.0124	0.92561	0.91988	0.92366
2.1674	1.485	1.2676	1.2221	1.1905		1.366	1.0289	0.91523	0.89242	0.87802		1.3618	0.99295	0.89225	0.8826	0.88161
1.9653	1.5692	1.4553	1.439	1.4328		1.1837	1.0529	1.0376	1.0448	1.0569		1.3452	1.2002	1.1704	1.1718	1.1761
2.1468	1.6686	1.4425	1.3809	1.3318		1.2113	1.0715	1.0109	0.99491	0.98236		0.96444	0.88068	0.84431	0.8393	0.83957
2.4636	1.7922	1.5151	1.453	1.4126		1.4128	1.1676	1.0695	1.0508	1.042		1.1558	0.97808	0.94646	0.95296	0.96571
2.1306	1.6764	1.4899	1.4452	1.4126		1.1993	1.0672	1.0369	1.037	1.042		1.0162	0.88633	0.86134	0.86852	0.88161
2.3713	1.7331	1.5037	1.4587	1.4328		1.3553	1.1162	1.0526	1.0498	1.0569		1.1522	1.0119	0.98496	0.993	1.0078
2.2529	1.6932	1.4785	1.4288	1.3924		1.3268	1.127	1.0542	1.0383	1.0271		1.1498	0.91931	0.84777	0.84037	0.83957
2.1287	1.6481	1.4565	1.4088	1.3722		1.2627	1.1018	1.0401	1.0246	1.0122		1.0581	0.93445	0.88672	0.88138	0.88161
2.2444	1.7275	1.5406	1.493	1.453		1.3561	1.1548	1.0929	1.0805	1.0718		1.0687	0.92738	0.88434	0.88049	0.88161
2.2294	1.764	1.6042	1.5732	1.554		1.2733	1.1269	1.1129	1.1256	1.1464		1.3029	1.1821	1.1566	1.1626	1.1761
2.2442	1.7298	1.5519	1.5164	1.4934		1.2855	1.1245	1.0917	1.0938	1.1017		1.2846	1.1628	1.1318	1.1314	1.134
2.2564	1.7277	1.4941	1.4286	1.3722		1.2919	1.1155	1.0446	1.0266	1.0122		1.0087	0.87683	0.83599	0.83461	0.83957
2.2136	1.674	1.459	1.4087	1.3722		1.2925	1.1026	1.0335	1.02	1.0122		1.1652	1.0028	0.95981	0.95969	0.96571
2.1279	1.6446	1.4642	1.4226	1.3924		1.248	1.0933	1.0428	1.033	1.0271		1.2802	1.0422	0.99457	0.9979	1.0078
2.4447	1.8433	1.6089	1.5609	1.5338		1.3773	1.1822	1.1271	1.1246	1.1315		1.2394	1.1129	1.1021	1.1152	1.134
2.1275	1.6758	1.4993	1.4528	1.4126		1.2141	1.0781	1.0465	1.043	1.042		1.0672	0.94582	0.91154	0.9137	0.92366
2.1258	1.6679	1.5182	1.4901	1.4732		1.2695	1.1094	1.0784	1.0801	1.0867		1.1624	1.0728	1.0913	1.1112	1.134
2.0785	1.6062	1.4291	1.3864	1.352		1.1916	1.0497	1.0091	1.0021	0.99727		1.0022	0.91264	0.8861	0.88297	0.88161
2.2202	1.6919	1.4826	1.4317	1.3924		1.3055	1.114	1.0463	1.0337	1.0271		1.1943	0.98505	0.94506	0.95129	0.96571
2.3659	1.8145	1.601	1.544	1.4934		1.3487	1.1711	1.1206	1.1103	1.1017		1.0172	0.90489	0.89616	0.90745	0.92366
2.363	1.85	1.6593	1.6119	1.5742		1.4424	1.2538	1.1884	1.173	1.1613		1.0765	0.90125	0.88886	0.90306	0.92366
2.1992	1.7489	1.551	1.497	1.453		1.2622	1.1307	1.0866	1.0775	1.0718		1.0501	0.98167	0.95646	0.95762	0.96571
1.9415	1.5269	1.3053	1.2347	1.1703		1.1292	0.9948	0.91812	0.89042	0.86311		0.90624	0.78212	0.71018	0.68908	0.67146
2.0854	1.612	1.4148	1.3598	1.3116		1.249	1.0722	1.0029	0.98399	0.96745		1.8179	1.4393	1.238	1.1813	1.134
1.9226	1.5102	1.3073	1.2456	1.1905		1.1246	0.99051	0.92084	0.89849	0.87802		0.92672	0.82211	0.77499	0.76363	0.7555
2.0724	1.5789	1.3368	1.2608	1.1905		1.1768	1.0194	0.93755	0.90808	0.87802		0.83832	0.73317	0.66498	0.64499	0.62945
2.2734	1.8165	1.621	1.5646	1.5136		1.4152	1.2369	1.1585	1.1361	1.1166		1.223	1.0868	1.0701	1.0784	1.0919
2.0018	1.5224	1.3621	1.3307	1.3116		1.2112	1.0142	0.96585	0.9633	0.96745		1.3769	1.0838	0.97897	0.96646	0.96571
2.0127	1.5664	1.405	1.3726	1.352		1.1488	1.0164	0.98786	0.98983	0.99727		1.2529	1.1248	1.0822	1.083	1.0919
1.9719	1.5885	1.4338	1.3978	1.3722		1.1782	1.0597	1.0207	1.0144	1.0122		0.92917	0.91168	0.9085	0.91398	0.92366
1.9294	1.514	1.3261	1.2741	1.2309		1.1059	0.98405	0.93371	0.9198	0.90783		0.86123	0.74686	0.6906	0.67855	0.67146
2.4637	1.6877	1.4026	1.3383	1.2914		1.4205	1.0941	0.98417	0.96389	0.95254		1.185	0.9362	0.82795	0.80786	0.79753
1.965	1.5541	1.371	1.3181	1.2712		1.1319	1.0112	0.96415	0.95043	0.93764		0.98575	0.84246	0.77337	0.76057	0.7555
1.9703	1.545	1.382	1.3424	1.3116		1.197	1.0344	0.98156	0.97219	0.96745		1.1484	0.96983	0.91924	0.91792	0.92366
2.1187	1.5891	1.4296	1.3967	1.3722		1.2633	1.059	1.0153	1.0118	1.0122		1.2353	1.0117	0.95359	0.95509	0.96571
2.0327	1.5891	1.446	1.4156	1.3924		1.193	1.0545	1.0264	1.0254	1.0271		1.1735	1.0176	0.99271	0.99812	1.0078
1.9796	1.4433	1.2457	1.2017	1.1703		1.121	0.9296	0.87142	0.86405	0.86311		1.1097	0.9047	0.84201	0.83689	0.83957
2.2019	1.6067	1.3919	1.352	1.3318		1.234	1.0256	0.97299	0.97289	0.98236		1.2367	1.0618	1.0245	1.0328	1.0498
1.8634	1.4175	1.2271	1.1747	1.1299		1.0567	0.91201	0.85944	0.84577	0.83331		1.179	1.0365	0.94514	0.91264	0.88161
1.7765	1.4015	1.2521	1.2167	1.1905		1.0256	0.91071	0.88031	0.87747	0.87802		0.97924	0.89292	0.87303	0.87551	0.88161
2.0194	1.483	1.2338	1.166	1.1097		1.0909	0.92117	0.85052	0.83282	0.81841		0.93219	0.81639	0.7256	0.69542	0.67146
2.1118	1.6672	1.4939	1.45	1.4126		1.2233	1.0777	1.0434	1.0411	1.042		1.1418	1.0314	0.99564	0.99767	1.0078
1.9634	1.4959	1.3308	1.2955	1.2712		1.0962	0.95703	0.93017	0.93163	0.93764		1.0952	1.0281	1.012	1.0093	1.0078
2.0198	1.6012	1.3985	1.3331	1.2712		1.1751	1.0459	0.98481	0.96201	0.93764		1.1209	0.9317	0.8425	0.81794	0.79753
1.9926	1.518	1.3077	1.2535	1.2107		1.1283	0.97466	0.91284	0.90022	0.89292		1.1573	1.0669	1.0192	1.0104	1.0078
2.0079	1.5147	1.2584	1.1869	1.1299		1.0864	0.9399	0.8662	0.84705	0.83331		1.3295	1.204	1.0902	1.0466	1.0078
1.9922	1.5372	1.3212	1.2611	1.2107		1.1007	0.97115	0.91727	0.90372	0.89292		1.2532	1.1357	1.0568	1.0306	1.0078
2.1665	1.6461	1.3964	1.3278	1.2712		1.1966	1.0367	0.96478	0.94836	0.93764		1.339	1.215	1.116	1.0807	1.0498
1.7879	1.4596	1.281	1.2235	1.1703		0.98704	0.91164	0.88109	0.87197	0.86311		0.86637	0.77399	0.71167	0.69042	0.67146
1.8935	1.4585	1.2539	1.197	1.1501		1.0706	0.92962	0.8716	0.85787	0.84821		1.0489	0.95385	0.90289	0.89001	0.88161
1.9276	1.4704	1.2526	1.195	1.1501		1.0648	0.92437	0.86671	0.85484	0.84821		1.1648	1.0532	0.99302	0.97702	0.96571
2.825	2.0309	1.7418	1.6708	1.6146		1.6897	1.371	1.2497	1.2178	1.1912		1.2149	0.96826	0.91346	0.915	0.92366
2.142	1.6186	1.3724	1.2981	1.2309		1.2108	1.0344	0.95608	0.93152	0.90783		1.1713	0.99669	0.87339	0.83258	0.79753
2.1924	1.6781	1.4334	1.3666	1.3116		1.2101	1.0512	0.98868	0.97567	0.96745		1.1896	1.0688	0.98029	0.95003	0.92366
2.0331	1.5806	1.3706	1.3149	1.2712		1.1481	1.0098	0.95618	0.94479	0.93764		1.1184	0.98777	0.89319	0.86337	0.83957
1.8796	1.4631	1.2606	1.2015	1.1501		1.0874	0.94987	0.88388	0.86466	0.84821		0.93918	0.8204	0.74889	0.72883	0.71348
1.9761	1.5484	1.3334	1.2684	1.2107		1.1285	0.99352	0.92916	0.90993	0.89292		1.1986	1.0366	0.91692	0.87574	0.83957
2.1177	1.6045	1.3468	1.2728	1.2107		1.1757	1.0105	0.93073	0.90938	0.89292		1.3471	1.1712	1.0435	1.0008	0.96571
2.0835	1.6578	1.4389	1.3787	1.3318		1.1784	1.0669	1.0092	0.99361	0.98236		1.3667	1.2207	1.1086	1.0746	1.0498
2.1758	1.6477	1.4327	1.3772	1.3318		1.2544	1.0706	1.0057	0.99194	0.98236		1.2511	1.1384	1.0776	1.0617	1.0498
2.3229	1.7604	1.4941	1.4249	1.3722		1.302	1.1243	1.0452	1.0259	1.0122		1.1555	1.0715	1.0309	1.0189	1.0078
2.2718	1.6323	1.3193	1.243	1.1905		1.2168	1.0105	0.91171	0.89001	0.87802		1.2729	1.0841	0.95065	0.91067	0.88161
2.3333	1.6708	1.406	1.3491	1.3116		1.2708	1.0518	0.97659	0.96737	0.96745		1.4325	1.2589	1.1497	1.1173	1.0919
2.2056	1.6004	1.3154	1.2436	1.1905		1.2196	1.0012	0.90737	0.88816	0.87802		1.5482	1.3434	1.191	1.1376	1.0919
2.1369	1.61	1.3762	1.3171	1.2712		1.198	1.0271	0.9583	0.94483	0.93764		1.4033	1.2455	1.1423	1.1131	1.0919
2.1973	1.6252	1.3936	1.3437	1.3116		1.2679	1.0518	0.97747	0.96789	0.96745		1.5684	1.3706	1.2425	1.2051	1.1761
1.9674	1.514	1.2958	1.237	1.1905		1.1107	0.97076	0.90618	0.88988	0.87802		1.234	1.0926	0.98559	0.95114	0.92366
2.1629	1.6259	1.3776	1.3161	1.2712		1.2212	1.0494	0.97016	0.95103	0.93764		1.2781	1.1371	1.0306	0.99557	0.96571
2.133	1.5529	1.3528	1.3216	1.3116		1.2224	1.0074	0.95222	0.95414	0.96745		1.3884	1.1923	1.105	1.0928	1.0919
1.9397	1.4815	1.2936	1.2542	1.2309		1.1102	0.9635	0.91281	0.90674	0.90783		1.0777	0.94309	0.89054	0.88325	0.88161
2.3035	1.8013	1.5865	1.5335	1.4934		1.3071	1.1624	1.114	1.1057	1.1017		1.3152	1.1562	1.1172	1.1219	1.134
2.3219	1.7913	1.5601	1.5001	1.453		1.3205	1.1536	1.0918	1.0793	1.0718		1.2053	1.0664	1.0122	1.0061	1.0078
2.3199	1.7796	1.5532	1.4966	1.453		1.3409	1.1564	1.0923	1.0796	1.0718		1.1895	1.062	1.0147	1.0086	1.0078
2.2322	1.7762	1.5831	1.533	1.4934		1.2868	1.1581	1.1154	1.1069	1.1017		1.3191	1.1589	1.0813	1.0628	1.0498
1.8387	1.448	1.2765	1.2297	1.1905		1.0454	0.93666	0.89674	0.88652	0.87802		0.86003	0.75844	0.70015	0.68395	0.67146
2.1868	1.6837	1.5097	1.4755	1.453		1.2387	1.084	1.0573	1.0619	1.0718		1.1265	0.99672	0.9349	0.92544	0.92366
2.3616	1.6899	1.4565	1.415	1.3924		1.3295	1.0833	1.0191	1.0181	1.0271		1.4875	1.2966	1.2172	1.2111	1.2182
2.2191	1.5928	1.336	1.2678	1.2107		1.269	1.0412	0.94366	0.91653	0.89292		1.146	0.96038	0.8522	0.82179	0.79753
1.6888	1.3435	1.1705	1.1172	1.0693		0.98159	0.87074	0.81887	0.80294	0.78861		0.83164	0.72449	0.65956	0.64191	0.62945
2.0118	1.4702	1.2392	1.1792	1.1299		1.131	0.93595	0.86177	0.84534	0.83331		1.3329	1.136	0.99826	0.95633	0.92366
2.0826	1.4976	1.2522	1.201	1.1703		1.1319	0.9347	0.86624	0.85964	0.86311		1.2838	1.1773	1.0747	1.0376	1.0078
1.8324	1.3559	1.1929	1.1642	1.1501		1.0301	0.87709	0.84069	0.84135	0.84821		1.3908	1.2669	1.1866	1.1591	1.134
1.8739	1.3522	1.1303	1.0736	1.029		1.0407	0.86176	0.78912	0.77173	0.75881		1.1263	0.94561	0.84525	0.81803	0.79753
1.7332	1.3571	1.2027	1.1626	1.1299		1.0174	0.88931	0.84588	0.8378	0.83331		1.2474	1.0519	0.9624	0.94029	0.92366
1.5179	1.22	1.097	1.0688	1.0492		0.88581	0.80634	0.77841	0.7744	0.77371		1.128	1.0324	0.96143	0.94029	0.92366
1.9524	1.5292	1.3605	1.3209	1.2914		1.1047	0.98948	0.95621	0.95259	0.95254		1.2654	1.1513	1.1059	1.0973	1.0919
2.29	1.662	1.3838	1.3103	1.2511		1.293	1.0764	0.97181	0.94413	0.92273		1.4947	1.3109	1.1912	1.1579	1.134
2.2457	1.6792	1.397	1.3168	1.2511		1.2385	1.0582	0.96692	0.94183	0.92273		1.2845	1.1848	1.1195	1.1023	1.0919
2.3843	1.7836	1.4596	1.3598	1.2712		1.2654	1.0896	0.99552	0.96537	0.93764		1.2094	1.0833	0.98853	0.95417	0.92366
2.1904	1.6784	1.4327	1.3584	1.2914		1.2255	1.0638	0.99138	0.97069	0.95254		1.1797	1.0711	1.0048	0.98365	0.96571
2.4196	1.8179	1.5904	1.5429	1.5136		1.409	1.2048	1.1323	1.1205	1.1166		1.4477	1.1903	1.0974	1.089	1.0919
2.4136	1.8483	1.5611	1.48	1.4126		1.3235	1.1593	1.08	1.0588	1.042		1.135	0.99302	0.89534	0.86456	0.83957
2.3742	1.855	1.5782	1.4912	1.4126		1.3524	1.1874	1.0983	1.0691	1.042		1.075	0.96757	0.91104	0.89496	0.88161
2.1013	1.6635	1.4241	1.3452	1.2712		1.2121	1.0814	0.99925	0.96843	0.93764		1.1294	1.0272	0.9624	0.94167	0.92366
2.173	1.6897	1.4456	1.3735	1.3116		1.2186	1.0636	0.99666	0.97989	0.96745		1.2262	1.1062	1.0403	1.0218	1.0078
2.0652	1.6092	1.3625	1.2831	1.2107		1.1587	1.0265	0.9482	0.92011	0.89292		1.0863	0.96215	0.88194	0.85795	0.83957
2.0697	1.6787	1.4858	1.4333	1.3924		1.1828	1.0787	1.038	1.0302	1.0271		1.2298	1.1593	1.1379	1.1349	1.134
2.2152	1.7031	1.486	1.425	1.3722		1.2194	1.0776	1.0317	1.021	1.0122		1.0268	0.96111	0.95818	0.96165	0.96571
1.9854	1.5869	1.4133	1.3678	1.3318		1.1389	1.0269	0.99071	0.98474	0.98236		1.2406	1.1415	1.1249	1.128	1.134
2.0044	1.5679	1.3513	1.2868	1.2309		1.1319	0.998	0.93743	0.92098	0.90783		0.9355	0.84658	0.80765	0.80029	0.79753
2.1159	1.6846	1.5056	1.4629	1.4328		1.1697	1.0697	1.0488	1.0505	1.0569		1.2421	1.1236	1.1145	1.1223	1.134
2.2173	1.6301	1.3309	1.2438	1.1703		1.1894	1.0045	0.9121	0.88547	0.86311		1.1106	0.99137	0.92648	0.9039	0.88161
2.2762	1.7486	1.5201	1.4674	1.4328		1.2297	1.0986	1.0581	1.0544	1.0569		1.4458	1.3178	1.2336	1.2033	1.1761
2.5153	1.8986	1.6781	1.6294	1.5944		1.4709	1.2556	1.1903	1.1803	1.1762		1.2049	1.0411	0.99683	0.99866	1.0078
2.2114	1.6794	1.4563	1.3986	1.352		1.2605	1.0894	1.0245	1.0091	0.99727		1.5106	1.3067	1.195	1.162	1.134
2.2867	1.7458	1.4431	1.3508	1.2712		1.2311	1.0741	0.98752	0.96079	0.93764		1.3581	1.2207	1.1008	1.0527	1.0078
2.1138	1.6005	1.3762	1.3183	1.2712		1.2162	1.0368	0.96452	0.94866	0.93764		1.3617	1.183	1.0457	1.0015	0.96571
2.4159	1.7633	1.5275	1.4733	1.4328		1.4033	1.1603	1.0805	1.0657	1.0569		1.1806	0.98875	0.95111	0.95516	0.96571
2.8269	1.8876	1.5688	1.5016	1.453		1.5456	1.1934	1.0887	1.0752	1.0718		1.1495	1.0364	1.0652	1.0962	1.134
2.4052	1.7605	1.5374	1.4887	1.453		1.4135	1.1707	1.0942	1.0803	1.0718		1.439	1.1281	1.024	1.011	1.0078
2.2395	1.6491	1.4402	1.3906	1.352		1.3523	1.1092	1.0277	1.01	0.99727		0.7365	0.66003	0.65082	0.65897	0.67146
2.2829	1.7017	1.5234	1.4915	1.4732		1.4413	1.1747	1.0987	1.0889	1.0867		1.8655	1.4157	1.201	1.1589	1.134
2.3427	1.8272	1.6114	1.5496	1.4934		1.3656	1.1854	1.1247	1.1116	1.1017		1.3678	1.2793	1.2771	1.2874	1.3024
2.3991	1.8116	1.5826	1.5232	1.4732		1.4081	1.1892	1.1162	1.0999	1.0867		1.3883	1.2319	1.1672	1.1498	1.134
2.124	1.6157	1.3744	1.2997	1.2309		1.1981	1.0361	0.95767	0.93218	0.90783		1.0879	0.98553	0.9205	0.89969	0.88161
1.8432	1.3901	1.2297	1.195	1.1703		1.0541	0.90109	0.86361	0.86114	0.86311		1.1099	0.99091	0.94696	0.93448	0.92366
1.8142	1.422	1.2355	1.1871	1.1501		0.98893	0.88439	0.84996	0.84651	0.84821		1.1494	1.0368	0.98532	0.97359	0.96571
1.9885	1.4125	1.1523	1.0917	1.0492		1.0814	0.88663	0.80078	0.78334	0.77371		0.90447	0.81543	0.74638	0.7267	0.71348
1.924	1.51	1.3607	1.3233	1.2914		1.122	0.98613	0.95558	0.9529	0.95254		0.89305	0.75012	0.68717	0.67608	0.67146
1.9788	1.523	1.3575	1.3197	1.2914		1.1839	1.0154	0.96473	0.95655	0.95254		0.85489	0.8124	0.81593	0.82608	0.83957
2.3823	1.8069	1.4967	1.3915	1.2914		1.2929	1.1157	1.02	0.98599	0.95254		1.1737	1.0323	0.98358	0.97294	0.96571
2.3054	1.823	1.6243	1.5735	1.5338		1.3053	1.1658	1.1305	1.1284	1.1315		1.4883	1.3026	1.2809	1.2892	1.3024
2.1293	1.6334	1.3952	1.3273	1.2712		1.1952	1.0421	0.97231	0.95301	0.93764		1.1151	0.99779	0.92673	0.90272	0.88161
2.1651	1.6861	1.4532	1.3865	1.3318		1.2064	1.0676	1.0073	0.99237	0.98236		1.352	1.2663	1.2365	1.2269	1.2182
2.253	1.7552	1.4721	1.3781	1.2914		1.2108	1.0762	1.0019	0.9765	0.95254		1.0223	0.9614	0.93774	0.93045	0.92366
2.3139	1.7595	1.4544	1.3642	1.2914		1.249	1.0855	0.99606	0.97068	0.95254		1.291	1.2543	1.2369	1.2278	1.2182
2.531	1.8455	1.5363	1.448	1.3722		1.4109	1.1635	1.0579	1.0315	1.0122		1.379	1.197	1.1401	1.1333	1.134
2.1832	1.748	1.5306	1.4664	1.4126		1.203	1.1011	1.0597	1.0493	1.042		1.4172	1.3726	1.3574	1.3508	1.3445
2.2819	1.6865	1.4092	1.3256	1.2511		1.2884	1.0849	0.98405	0.952	0.92273		1.2066	1.0528	0.9929	0.97751	0.96571
2.2661	1.7438	1.4571	1.3681	1.2914		1.2122	1.0685	0.99238	0.97002	0.95254		1.0275	0.9734	0.94466	0.93383	0.92366
2.0846	1.6072	1.3576	1.2799	1.2107		1.1457	1.0102	0.93665	0.9134	0.89292		1.0063	0.93843	0.92514	0.924	0.92366
2.1671	1.6294	1.3779	1.3079	1.2511		1.1965	1.0317	0.95576	0.93645	0.92273		1.0274	0.9792	0.94897	0.93649	0.92366
2.2323	1.6843	1.3967	1.3083	1.2309		1.1993	1.0401	0.95536	0.92961	0.90783		1.0411	0.93613	0.87528	0.85561	0.83957
2.3091	1.7482	1.4365	1.3375	1.2511		1.2558	1.0774	0.98081	0.94969	0.92273		1.3345	1.1208	1.0165	0.98725	0.96571
2.4371	1.7961	1.4955	1.4074	1.3318		1.3834	1.1498	1.041	1.0093	0.98236		1.6732	1.3397	1.18	1.1326	1.0919
2.5608	1.8557	1.5377	1.4476	1.3722		1.4318	1.1807	1.068	1.037	1.0122		1.7114	1.376	1.241	1.2051	1.1761
2.1226	1.5511	1.3049	1.2404	1.1905		1.1946	0.99767	0.9139	0.893	0.87802		1.1339	0.99146	0.94328	0.93186	0.92366
2.0133	1.6256	1.4264	1.3654	1.3116		1.1379	1.0416	0.99505	0.98047	0.96745		1.177	1.1068	1.075	1.0627	1.0498
2.4862	1.6999	1.3928	1.3144	1.2511		1.3998	1.0966	0.97481	0.94512	0.92273		1.2678	0.96802	0.9156	0.91633	0.92366
2.3824	1.8656	1.6161	1.5405	1.4732		1.3738	1.2022	1.124	1.103	1.0867		1.7676	1.5816	1.4873	1.4566	1.4287
2.5351	1.7902	1.4427	1.3403	1.2511		1.3747	1.1192	0.99481	0.95674	0.92273		1.0162	0.90852	0.88401	0.8817	0.88161
2.0392	1.5541	1.3025	1.2228	1.1501		1.1479	0.98794	0.90277	0.8746	0.84821		0.97723	0.83687	0.75877	0.73444	0.71348
2.0826	1.6688	1.4451	1.3746	1.3116		1.1528	1.0447	0.99266	0.97827	0.96745		1.1657	1.0945	1.0675	1.0586	1.0498
1.9577	1.5825	1.382	1.3216	1.2712		1.098	1.0053	0.95981	0.94707	0.93764		0.93015	0.92644	0.92569	0.92452	0.92366
1.8993	1.5583	1.3694	1.3076	1.2511		1.0678	0.99266	0.95278	0.93796	0.92273		1.071	1.0047	0.95789	0.94013	0.92366
2.2761	1.7452	1.4966	1.4276	1.3722		1.251	1.0904	1.0308	1.0187	1.0122		1.1145	0.93636	0.86144	0.84623	0.83957
2.4531	1.7929	1.5026	1.4281	1.3722		1.3366	1.1279	1.0426	1.0237	1.0122		1.2702	1.1199	1.028	0.99548	0.96571
2.2374	1.7343	1.5039	1.4417	1.3924		1.2355	1.0931	1.0406	1.031	1.0271		1.481	1.3109	1.2223	1.1965	1.1761
2.0746	1.6006	1.3775	1.318	1.2712		1.1679	1.0168	0.9566	0.94436	0.93764		1.2856	1.1826	1.1004	1.0726	1.0498
2.1122	1.6634	1.4447	1.383	1.3318		1.1904	1.0601	1.0069	0.99329	0.98236		1.2479	1.1337	1.0328	0.9964	0.96571
2.2256	1.6648	1.4107	1.3508	1.3116		1.2209	1.0501	0.98268	0.97101	0.96745		1.1901	1.0846	1.006	0.98204	0.96571
2.2649	1.6316	1.3785	1.317	1.2712		1.2526	1.0385	0.96359	0.94799	0.93764		1.1767	1.0308	0.93575	0.90603	0.88161
2.1179	1.647	1.4506	1.3969	1.352		1.2048	1.061	1.0151	1.005	0.99727		1.2466	1.1195	1.049	1.0268	1.0078
1.9982	1.5539	1.3113	1.2364	1.1703		1.083	0.96939	0.90705	0.88499	0.86311		1.0575	0.93749	0.83232	0.79185	0.7555
2.2145	1.7123	1.4665	1.3941	1.3318		1.2285	1.0822	1.0168	0.99816	0.98236		1.3613	1.2577	1.1877	1.1603	1.134
2.2877	1.7297	1.4692	1.3948	1.3318		1.2785	1.0951	1.0187	0.99855	0.98236		1.1723	1.0623	1.0009	0.98173	0.96571
2.0381	1.6102	1.386	1.3151	1.2511		1.1732	1.0427	0.96957	0.94515	0.92273		1.2976	1.1207	1.0206	0.99043	0.96571
2.3114	1.719	1.4574	1.3877	1.3318		1.3096	1.1065	1.0207	0.99905	0.98236		1.2815	1.1339	1.0508	1.0269	1.0078
2.3506	1.8239	1.5979	1.5395	1.4934		1.3023	1.1537	1.1108	1.1045	1.1017		1.2571	1.1332	1.0577	1.0318	1.0078
2.1603	1.6616	1.4016	1.3215	1.2511		1.2288	1.0593	0.97274	0.94605	0.92273		1.1212	0.99347	0.90021	0.86763	0.83957
2.431	1.7683	1.4506	1.3555	1.2712		1.3594	1.1233	1.0055	0.96954	0.93764		1.2776	1.1293	1.0277	0.9942	0.96571
2.1302	1.582	1.3524	1.2948	1.2511		1.1999	1.0222	0.95125	0.93466	0.92273		1.2305	1.0719	0.97751	0.94833	0.92366
2.2111	1.685	1.4139	1.3359	1.2712		1.1888	1.0339	0.96684	0.95006	0.93764		1.2553	1.0946	0.9715	0.92467	0.88161
2.3053	1.6994	1.3781	1.2858	1.2107		1.2341	1.042	0.94263	0.91465	0.89292		1.2251	1.0079	0.87357	0.83147	0.79753
2.3029	1.7066	1.4405	1.3767	1.3318		1.2785	1.0786	1.0028	0.98888	0.98236		1.4383	1.2569	1.1473	1.116	1.0919
2.2807	1.7347	1.4519	1.3735	1.3116		1.2229	1.0583	0.98809	0.97399	0.96745		1.2143	1.0943	0.99426	0.95655	0.92366
2.1684	1.6245	1.3614	1.2817	1.2107		1.2256	1.0362	0.94594	0.91819	0.89292		1.3082	1.1224	0.99766	0.95741	0.92366
2.4496	1.7468	1.4379	1.3635	1.3116		1.3166	1.0812	0.99236	0.97564	0.96745		1.3968	1.1676	1.015	0.965	0.92366
2.1354	1.6519	1.4056	1.3402	1.2914		1.1768	1.0325	0.97018	0.95784	0.95254		1.2913	1.1331	1.0077	0.96249	0.92366
2.1426	1.5657	1.2943	1.2236	1.1703		1.1796	0.98318	0.89753	0.87712	0.86311		1.5105	1.275	1.1085	1.0535	1.0078
2.2356	1.6749	1.4636	1.4122	1.3722		1.2787	1.0878	1.0275	1.0172	1.0122		1.2917	1.1143	1.0656	1.0563	1.0498
1.9759	1.5878	1.4027	1.3448	1.2914		1.1041	1.0066	0.97277	0.96267	0.95254		0.73634	0.66668	0.63892	0.63296	0.62945
1.9008	1.4855	1.2494	1.1751	1.1097		1.0336	0.92074	0.85933	0.83843	0.81841		0.92162	0.78156	0.68947	0.65775	0.62945
1.9922	1.5545	1.3367	1.2771	1.2309		1.1064	0.98401	0.92844	0.91551	0.90783		0.97089	0.8878	0.8534	0.84528	0.83957
2.124	1.6875	1.5054	1.4621	1.4328		1.2389	1.1027	1.0612	1.0562	1.0569		1.1497	1.1144	1.1393	1.1568	1.1761
2.1942	1.6342	1.3763	1.3137	1.2712		1.2063	1.0251	0.95391	0.94154	0.93764		1.285	1.1278	1.0247	0.99193	0.96571
2.5953	1.8474	1.5608	1.4973	1.453		1.4461	1.1719	1.087	1.0753	1.0718		1.5896	1.3806	1.2503	1.21	1.1761
2.1867	1.5956	1.3277	1.2606	1.2107		1.1733	0.98643	0.91555	0.90144	0.89292		1.239	1.061	0.94982	0.91344	0.88161
2.6396	1.8685	1.4378	1.3051	1.1905		1.4118	1.1287	0.96904	0.9197	0.87802		1.7761	1.5634	1.4132	1.3567	1.3024
2.3074	1.6151	1.3257	1.2581	1.2107		1.2973	1.0295	0.92406	0.90367	0.89292		1.7219	1.4668	1.2898	1.2292	1.1761
2.2841	1.6824	1.4814	1.4324	1.3924		1.3139	1.0923	1.0407	1.0326	1.0271		0.87425	0.82552	0.85254	0.86786	0.88161
2.3769	1.7725	1.5028	1.4378	1.3924		1.2892	1.1035	1.0378	1.0284	1.0271		1.4188	1.2392	1.1227	1.0837	1.0498
2.1594	1.5938	1.3189	1.239	1.1703		1.1904	1.0056	0.91624	0.88859	0.86311		1.2471	1.0943	0.96794	0.92196	0.88161
2.1641	1.6395	1.3747	1.2971	1.2309		1.2175	1.0406	0.9532	0.92828	0.90783		1.5291	1.3517	1.2211	1.1748	1.134
2.197	1.7349	1.543	1.4931	1.453		1.265	1.1383	1.0934	1.0819	1.0718		1.1488	1.0517	1.0176	1.0117	1.0078
2.2041	1.7205	1.4571	1.3781	1.3116		1.2026	1.0776	1.0094	0.98732	0.96745		1.1242	1.011	0.91073	0.8729	0.83957
2.2779	1.7419	1.5323	1.478	1.4328		1.3283	1.1526	1.0895	1.0726	1.0569		1.2531	1.1001	1.0212	0.9935	0.96571
2.3987	1.7476	1.4587	1.3789	1.3116		1.3794	1.1444	1.0281	0.99496	0.96745		1.2491	1.0577	0.95653	0.93485	0.92366
2.2157	1.7335	1.478	1.3927	1.3116		1.2999	1.137	1.0388	1.003	0.96745		0.94919	0.81733	0.77215	0.76252	0.7555
2.0784	1.5014	1.2898	1.2432	1.2107		1.257	1.0166	0.92602	0.9063	0.89292		0.86075	0.73794	0.70673	0.70807	0.71348
2.3974	1.8437	1.5669	1.4911	1.4328		1.2998	1.1458	1.0773	1.0631	1.0569		1.3392	1.3021	1.2762	1.267	1.2603
2.0176	1.4583	1.254	1.2068	1.1703		1.193	0.9691	0.89195	0.87551	0.86311		1.0176	0.88612	0.80221	0.77689	0.7555
1.9491	1.4373	1.2454	1.2025	1.1703		1.1542	0.94575	0.87758	0.86723	0.86311		1.1382	1.0447	1.0081	1.0051	1.0078
2.3852	1.7329	1.4438	1.3698	1.3116		1.3251	1.0995	1.0046	0.9828	0.96745		1.5757	1.3656	1.2175	1.1712	1.134
2.5371	1.8803	1.5673	1.4826	1.4126		1.3746	1.1655	1.0749	1.055	1.042		1.7553	1.5949	1.5057	1.484	1.4708
2.3424	1.809	1.5609	1.4915	1.4328		1.3243	1.1543	1.0859	1.0694	1.0569		1.3509	1.2181	1.1328	1.109	1.0919
2.4503	1.9129	1.6558	1.5806	1.5136		1.382	1.2236	1.1539	1.1342	1.1166		1.5582	1.4359	1.3347	1.2962	1.2603
2.4438	1.9112	1.6596	1.5836	1.5136		1.4261	1.2427	1.162	1.1384	1.1166		1.5898	1.3897	1.2532	1.211	1.1761
2.4759	1.8118	1.5169	1.4365	1.3722		1.3365	1.1291	1.046	1.026	1.0122		1.6002	1.3079	1.1914	1.1594	1.134
2.2043	1.6183	1.4028	1.3584	1.3318		1.2861	1.0667	0.9948	0.98435	0.98236		0.99752	0.87679	0.8549	0.86459	0.88161
2.329	1.6982	1.5013	1.4611	1.4328		1.4071	1.1469	1.0731	1.0619	1.0569		1.2183	0.96372	0.86306	0.8471	0.83957
2.2915	1.6559	1.3696	1.2997	1.2511		1.2351	1.031	0.94476	0.92857	0.92273		1.3013	1.1641	1.0853	1.0642	1.0498
2.2659	1.6099	1.3628	1.3084	1.2712		1.3541	1.0844	0.97438	0.95131	0.93764		1.2726	1.1476	1.0755	1.0593	1.0498
2.3332	1.7338	1.4141	1.3231	1.2511		1.2406	1.0594	0.96633	0.94107	0.92273		1.2157	1.0891	0.98834	0.95245	0.92366
2.3794	1.8256	1.5015	1.3993	1.3116		1.2896	1.1247	1.0259	0.99413	0.96745		1.2771	1.1742	1.0978	1.071	1.0498
2.857	2.1106	1.7618	1.6678	1.5944		1.5518	1.3137	1.2143	1.1912	1.1762		1.5021	1.2953	1.1868	1.1563	1.134
2.5892	2.0021	1.6972	1.6009	1.5136		1.4525	1.2691	1.1744	1.1441	1.1166		1.5869	1.3908	1.3044	1.28	1.2603
2.3953	1.9087	1.6962	1.6397	1.5944		1.3862	1.2348	1.1842	1.177	1.1762		1.4953	1.2786	1.2173	1.2135	1.2182
2.5548	1.8838	1.557	1.4655	1.3924		1.4012	1.18	1.0746	1.0471	1.0271		0.95352	0.87877	0.85145	0.84435	0.83957
2.5939	1.8638	1.53	1.4409	1.3722		1.4183	1.1677	1.0563	1.0295	1.0122		1.1973	1.0116	0.96201	0.95958	0.96571
2.3714	1.8314	1.5504	1.4653	1.3924		1.3084	1.151	1.0704	1.0465	1.0271		1.5657	1.3868	1.3046	1.2803	1.2603
2.2982	1.7545	1.5037	1.4321	1.3722		1.2908	1.1274	1.0527	1.0308	1.0122		1.3987	1.181	1.0696	1.0361	1.0078
2.4312	1.8627	1.5925	1.5158	1.453		1.347	1.1775	1.1045	1.0857	1.0718		1.5324	1.2871	1.1815	1.1543	1.134
2.4345	1.8376	1.5561	1.4772	1.4126		1.3629	1.1702	1.0823	1.0592	1.042		1.2636	1.103	1.0767	1.0816	1.0919
2.4256	1.8009	1.5089	1.4243	1.352		1.3447	1.1438	1.0473	1.0198	0.99727		1.4695	1.2459	1.1418	1.1137	1.0919
2.4756	1.8738	1.5204	1.4083	1.3116		1.3202	1.146	1.0364	0.99962	0.96745		1.1209	1.0431	0.97698	0.94967	0.92366
2.4371	1.7911	1.4486	1.3433	1.2511		1.3427	1.128	1.0029	0.96104	0.92273		1.0996	1.0175	0.96166	0.94165	0.92366
2.4602	1.8622	1.6089	1.5435	1.4934		1.3534	1.1809	1.1191	1.1074	1.1017		1.5303	1.3206	1.2247	1.1976	1.1761
2.5328	1.9624	1.6713	1.5784	1.4934		1.4053	1.2364	1.1536	1.1267	1.1017		1.337	1.1838	1.1192	1.1031	1.0919
2.3636	1.8593	1.5469	1.4369	1.3318		1.31	1.1708	1.0675	1.0256	0.98236		1.0603	0.99452	0.95355	0.93823	0.92366
2.6158	1.9116	1.5593	1.4571	1.3722		1.4271	1.1914	1.0725	1.0388	1.0122		1.2287	1.0606	0.9689	0.94279	0.92366
2.5343	1.9001	1.5782	1.4792	1.3924		1.4233	1.2024	1.091	1.0568	1.0271		1.0463	0.86925	0.81214	0.80206	0.79753
2.5112	1.933	1.6114	1.5068	1.4126		1.3955	1.2119	1.109	1.0741	1.042		1.2717	1.1371	1.0793	1.0628	1.0498
2.5015	1.9243	1.6042	1.4956	1.3924		1.3923	1.2161	1.1075	1.0672	1.0271		1.1351	0.98144	0.91563	0.89706	0.88161
2.4695	1.9417	1.6627	1.5737	1.4934		1.3594	1.213	1.1417	1.1202	1.1017		1.2128	1.1253	1.0802	1.0644	1.0498
2.4817	1.9271	1.6366	1.5485	1.4732		1.3374	1.1883	1.1181	1.0997	1.0867		1.2118	1.0529	0.969	0.94366	0.92366
2.4812	1.9019	1.6516	1.5856	1.5338		1.4021	1.2159	1.1494	1.1371	1.1315		1.4232	1.1834	1.1063	1.095	1.0919
2.5509	1.8956	1.589	1.5032	1.4328		1.428	1.2028	1.1008	1.075	1.0569		1.4847	1.2931	1.188	1.1575	1.134
2.4303	1.8397	1.5317	1.4362	1.352		1.3826	1.1791	1.0652	1.029	0.99727		1.2708	1.1315	1.0549	1.03	1.0078
2.4994	1.8957	1.5838	1.4977	1.4328		1.3578	1.1818	1.0912	1.0691	1.0569		1.5989	1.4631	1.382	1.359	1.3445
2.4997	1.8691	1.586	1.5111	1.453		1.4194	1.2056	1.1115	1.0881	1.0718		1.5231	1.2867	1.1736	1.1482	1.134
2.4811	1.9489	1.6443	1.544	1.453		1.3524	1.2129	1.1311	1.1011	1.0718		1.1847	1.0815	1.0153	0.98992	0.96571
2.2035	1.7889	1.5805	1.5143	1.453		1.285	1.1623	1.1051	1.0877	1.0718		1.28	1.1315	1.0935	1.0906	1.0919
2.3705	1.8236	1.5529	1.4688	1.3924		1.3244	1.1612	1.0808	1.0538	1.0271		1.081	0.94849	0.86148	0.82888	0.79753
2.2721	1.8109	1.5731	1.4991	1.4328		1.2782	1.1514	1.0904	1.0723	1.0569		0.94012	0.91445	0.91373	0.91743	0.92366
2.2258	1.761	1.5073	1.4259	1.352		1.2525	1.1146	1.0419	1.0184	0.99727		1.0981	0.98266	0.91659	0.89694	0.88161
2.4061	1.8731	1.6146	1.5383	1.4732		1.3537	1.2	1.1263	1.1047	1.0867		1.0942	1.0051	0.97359	0.96782	0.96571
2.3581	1.825	1.5111	1.4066	1.3116		1.2966	1.1379	1.0387	1.0024	0.96745		1.021	0.93024	0.88171	0.86145	0.83957
2.4938	1.8619	1.5561	1.4674	1.3924		1.3821	1.1793	1.0815	1.0524	1.0271		1.1249	0.97146	0.93203	0.92641	0.92366
2.4216	1.859	1.5889	1.5137	1.453		1.3482	1.1881	1.1119	1.0899	1.0718		1.2405	1.1457	1.087	1.067	1.0498
2.5399	1.9871	1.7144	1.63	1.554		1.449	1.2832	1.1996	1.1722	1.1464		1.2692	1.1273	1.0958	1.0929	1.0919
2.3347	1.7649	1.4775	1.3964	1.3318		1.2975	1.1142	1.0241	0.99992	0.98236		1.2249	1.1084	1.04	1.0204	1.0078
2.4873	1.862	1.5566	1.4744	1.4126		1.3599	1.1663	1.0754	1.0541	1.042		1.4913	1.3396	1.2648	1.24	1.2182
2.6308	1.9101	1.5409	1.4289	1.3318		1.4283	1.1904	1.0603	1.0189	0.98236		1.4499	1.2217	1.1039	1.0721	1.0498
2.6715	2.0591	1.7083	1.5878	1.4732		1.4587	1.2845	1.1732	1.1303	1.0867		1.6252	1.4749	1.3775	1.3398	1.3024
2.5956	1.9637	1.6625	1.5795	1.5136		1.4258	1.2362	1.1514	1.1305	1.1166		1.5068	1.3592	1.2675	1.2393	1.2182
2.4823	1.9098	1.5864	1.4836	1.3924		1.3873	1.2053	1.0954	1.0591	1.0271		1.5672	1.3817	1.253	1.2106	1.1761
2.4621	1.8795	1.6147	1.546	1.4934		1.3588	1.1832	1.1171	1.1057	1.1017		1.3209	1.2204	1.2037	1.2091	1.2182
2.6141	2.0549	1.7644	1.6744	1.5944		1.4253	1.2864	1.2182	1.1964	1.1762		1.3107	1.196	1.1123	1.08	1.0498
2.5001	1.8925	1.554	1.4469	1.352		1.3793	1.184	1.0703	1.0321	0.99727		1.2367	1.1119	1.0439	1.0236	1.0078
2.6605	1.9266	1.5565	1.4465	1.352		1.4524	1.1979	1.0672	1.0289	0.99727		1.6314	1.4198	1.29	1.25	1.2182
2.4411	1.8174	1.5139	1.4267	1.352		1.3311	1.1331	1.0434	1.0185	0.99727		1.3352	1.1088	0.96269	0.91769	0.88161
2.4723	1.8225	1.5217	1.4401	1.3722		1.3832	1.1525	1.0545	1.0306	1.0122		1.5181	1.3561	1.2445	1.2076	1.1761
2.2444	1.748	1.5078	1.4359	1.3722		1.252	1.1185	1.0549	1.0335	1.0122		1.0959	0.98035	0.91673	0.89775	0.88161
2.1319	1.6833	1.4892	1.4363	1.3924		1.2066	1.0806	1.0393	1.0315	1.0271		1.0253	1.0301	1.0898	1.1138	1.134
1.9601	1.502	1.3491	1.3232	1.3116		1.1188	0.97656	0.95276	0.95746	0.96745		1.2127	1.0699	1.066	1.0787	1.0919
1.9156	1.5565	1.3837	1.3337	1.2914		1.1163	1.0174	0.97656	0.96412	0.95254		0.98717	0.85812	0.78524	0.7673	0.7555
2.1117	1.62	1.4465	1.405	1.3722		1.2727	1.0878	1.0318	1.0204	1.0122		1.6276	1.3123	1.1875	1.1576	1.134
2.1185	1.617	1.3853	1.322	1.2712		1.1924	1.0338	0.96905	0.95184	0.93764		0.97479	0.89711	0.85943	0.84876	0.83957
2.0656	1.6017	1.3857	1.3309	1.2914		1.1499	1.0268	0.97414	0.96127	0.95254		1.1307	0.99495	0.93805	0.92811	0.92366
2.2939	1.7148	1.4372	1.3651	1.3116		1.2679	1.0804	0.99721	0.9784	0.96745		1.0794	0.97373	0.88856	0.86076	0.83957
2.1389	1.6266	1.4669	1.4419	1.4328		1.2302	1.0651	1.0377	1.0437	1.0569		1.5682	1.283	1.1907	1.1791	1.1761
2.3272	1.7462	1.5287	1.4825	1.453		1.3304	1.1283	1.0718	1.0677	1.0718		1.2281	1.0632	1.0085	1.0046	1.0078
2.2414	1.714	1.4416	1.3607	1.2914		1.2403	1.0767	0.99704	0.9733	0.95254		0.90195	0.84212	0.815	0.80638	0.79753
2.0939	1.7227	1.5131	1.4481	1.3924		1.146	1.0659	1.0349	1.029	1.0271		0.89986	0.8591	0.8392	0.83699	0.83957
2.2661	1.7409	1.5018	1.4326	1.3722		1.2709	1.1195	1.0529	1.0321	1.0122		1.0207	0.94842	0.90805	0.89426	0.88161
2.2099	1.6404	1.441	1.3922	1.352		1.3152	1.0922	1.023	1.0084	0.99727		1.0024	0.87578	0.83557	0.83436	0.83957
2.6743	1.954	1.5956	1.4872	1.3924		1.4623	1.2265	1.1025	1.0628	1.0271		1.1074	0.99061	0.94347	0.9317	0.92366
2.2496	1.6483	1.4097	1.3607	1.3318		1.2797	1.0646	0.98974	0.98083	0.98236		1.0529	0.93694	0.91137	0.91484	0.92366
2.0246	1.5959	1.4082	1.3561	1.3116		1.1827	1.0466	0.99631	0.98168	0.96745		1.3424	1.1003	1.0123	0.98844	0.96571
1.9732	1.5427	1.3369	1.2788	1.2309		1.0929	0.9781	0.92889	0.9166	0.90783		1.0281	0.93636	0.91357	0.91575	0.92366
2.133	1.6189	1.3725	1.2978	1.2309		1.1683	1.0181	0.94859	0.92737	0.90783		0.81644	0.71993	0.7044	0.70744	0.71348
2.1217	1.6852	1.4645	1.395	1.3318		1.2139	1.0875	1.0243	1.0029	0.98236		1.0081	0.86819	0.81792	0.80613	0.79753
2.6248	2.0154	1.6955	1.598	1.5136		1.4864	1.2905	1.1813	1.1467	1.1166		1.3377	1.2122	1.139	1.1143	1.0919
2.5664	1.9651	1.6541	1.5578	1.4732		1.4304	1.2485	1.15	1.1172	1.0867		0.97693	0.89844	0.84251	0.81987	0.79753
2.5224	1.7155	1.466	1.4275	1.4126		1.4828	1.14	1.0432	1.0359	1.042		2.7306	1.8683	1.4753	1.395	1.3445
2.3277	1.7832	1.5535	1.5035	1.4732		1.3148	1.1403	1.085	1.0811	1.0867		1.2445	1.1535	1.1274	1.1284	1.134
2.428	1.9044	1.6914	1.6441	1.6146		1.4014	1.2448	1.1948	1.1891	1.1912		1.2086	1.1264	1.1369	1.1542	1.1761
2.7975	2.0302	1.6822	1.5958	1.5338		1.5698	1.3015	1.1792	1.1503	1.1315		1.5721	1.3558	1.2404	1.2052	1.1761
2.7402	2.0432	1.6911	1.5925	1.5136		1.4986	1.2786	1.1679	1.1384	1.1166		1.4109	1.2405	1.1221	1.0826	1.0498
2.3075	1.7535	1.5296	1.4749	1.4328		1.3042	1.1295	1.072	1.0621	1.0569		1.2577	1.1297	1.0717	1.0586	1.0498
2.2409	1.7453	1.497	1.4205	1.352		1.3077	1.1386	1.0509	1.0228	0.99727		1.1721	1.0256	0.95251	0.93517	0.92366
2.204	1.7232	1.5099	1.4551	1.4126		1.2586	1.1127	1.0573	1.047	1.042		1.2931	1.1625	1.0626	1.0316	1.0078
1.6984	1.2503	1.0814	1.0405	1.0088		0.98226	0.82254	0.76481	0.75239	0.74391		1.0276	0.83806	0.79368	0.79286	0.79753
1.8434	1.4599	1.2831	1.2332	1.1905		1.0583	0.94732	0.90291	0.89016	0.87802		0.88511	0.83067	0.83375	0.83765	0.83957
2.1238	1.7094	1.5024	1.4352	1.3722		1.2381	1.1137	1.0534	1.0327	1.0122		0.80814	0.74305	0.7447	0.74965	0.7555
2.2864	1.7247	1.4599	1.3816	1.3116		1.2794	1.1017	1.0191	0.99289	0.96745		1.14	0.99814	0.89948	0.86727	0.83957
2.3968	1.8701	1.5986	1.5194	1.453		1.3417	1.1841	1.1084	1.0878	1.0718		1.4674	1.2972	1.233	1.222	1.2182
2.2769	1.7666	1.4946	1.409	1.3318		1.301	1.1385	1.0444	1.0124	0.98236		1.1782	1.0483	0.96382	0.94036	0.92366
2.3654	1.8639	1.6254	1.5614	1.5136		1.3263	1.1902	1.1358	1.1236	1.1166		1.1514	1.0861	1.0577	1.0521	1.0498
2.9135	2.2182	1.882	1.7818	1.6954		1.6092	1.3998	1.3005	1.2727	1.2508		1.9265	1.6769	1.5895	1.5692	1.5551
2.7827	2.113	1.7718	1.6671	1.5742		1.6023	1.3673	1.2381	1.1973	1.1613		1.6406	1.3935	1.2696	1.2389	1.2182
2.6808	2.0792	1.7679	1.6743	1.5944		1.495	1.3125	1.2229	1.1971	1.1762		1.6896	1.5013	1.4014	1.3705	1.3445
2.9129	2.1519	1.7896	1.684	1.5944		1.6191	1.3692	1.2454	1.2082	1.1762		1.4333	1.2301	1.1758	1.1719	1.1761
2.9045	2.2414	1.9182	1.8278	1.756		1.5773	1.3875	1.3126	1.2992	1.2956		1.8011	1.6143	1.5417	1.5245	1.513
2.6443	2.0274	1.727	1.6423	1.5742		1.4973	1.2973	1.2034	1.1788	1.1613		1.4845	1.2583	1.1715	1.1499	1.134
2.6163	2.0321	1.7436	1.6542	1.5742		1.4914	1.2968	1.2068	1.1816	1.1613		1.5051	1.3161	1.2657	1.26	1.2603
2.5974	2.1174	1.8437	1.7554	1.6752		1.4742	1.3499	1.2788	1.2559	1.2359		1.3937	1.2653	1.2158	1.2123	1.2182
2.6715	2.0437	1.7423	1.6598	1.5944		1.5241	1.318	1.2195	1.1942	1.1762		1.4341	1.1997	1.1319	1.128	1.134
2.7911	2.1241	1.7697	1.6564	1.554		1.5623	1.3432	1.2223	1.1825	1.1464		1.4173	1.2355	1.1459	1.1173	1.0919
2.7463	2.0706	1.7557	1.6674	1.5944		1.5061	1.3046	1.2166	1.1937	1.1762		1.3391	1.1488	1.0719	1.0569	1.0498
2.6735	1.9816	1.6275	1.5223	1.4328		1.4532	1.2404	1.1271	1.0904	1.0569		1.2354	1.1027	1.0158	0.98771	0.96571
2.5806	2.0438	1.7553	1.661	1.5742		1.4709	1.3136	1.2243	1.1923	1.1613		1.4872	1.381	1.313	1.2865	1.2603
2.8927	2.1686	1.8357	1.7458	1.6752		1.6113	1.3807	1.2796	1.2541	1.2359		1.4699	1.3031	1.2144	1.1913	1.1761
3.0202	2.2705	1.8962	1.7873	1.6954		1.648	1.4202	1.3074	1.2759	1.2508		1.3115	1.1351	1.0733	1.0594	1.0498
2.7806	2.1724	1.8318	1.7189	1.6146		1.5293	1.357	1.2575	1.2232	1.1912		1.4433	1.3499	1.2792	1.2489	1.2182
3.0251	2.2077	1.7948	1.6673	1.554		1.6423	1.3694	1.2296	1.1856	1.1464		1.7027	1.3944	1.2478	1.2074	1.1761
2.9228	2.1838	1.8096	1.702	1.6146		1.5667	1.3482	1.2417	1.2128	1.1912		1.6062	1.3668	1.2477	1.2096	1.1761
2.7337	2.0632	1.7317	1.6281	1.5338		1.5414	1.3205	1.205	1.1671	1.1315		1.2951	1.1017	1.0357	1.02	1.0078
2.7231	2.0164	1.6131	1.4849	1.3722		1.468	1.239	1.1003	1.0538	1.0122		1.2162	1.0542	0.97053	0.94491	0.92366
2.7645	2.0912	1.7437	1.6407	1.554		1.527	1.3201	1.2071	1.1736	1.1464		1.405	1.3174	1.2609	1.2392	1.2182
2.6707	2.0194	1.6898	1.5867	1.4934		1.4914	1.2864	1.1758	1.138	1.1017		1.208	0.99624	0.91273	0.894	0.88161
2.8291	2.1403	1.7779	1.661	1.554		1.5396	1.3323	1.2196	1.1818	1.1464		1.1273	0.99854	0.92816	0.904	0.88161
2.7611	2.0618	1.6905	1.5747	1.4732		1.4759	1.263	1.1531	1.118	1.0867		0.86331	0.74778	0.69719	0.68284	0.67146
2.7152	2.0687	1.7648	1.6813	1.6146		1.5043	1.3033	1.2192	1.2011	1.1912		1.7917	1.5702	1.4761	1.4499	1.4287
2.6788	2.1003	1.7919	1.6967	1.6146		1.4996	1.3273	1.2379	1.2117	1.1912		1.7884	1.6794	1.6096	1.5822	1.5551
2.4534	1.8587	1.5444	1.4439	1.352		1.3955	1.198	1.0791	1.0372	0.99727		1.2732	1.1455	1.0614	1.0328	1.0078
1.9962	1.3351	1.1421	1.1087	1.0895		1.2073	0.90179	0.81872	0.80756	0.80351		1.5851	1.1223	0.8835	0.83218	0.79753
1.4923	1.1642	1.0446	1.0218	1.0088		0.8599	0.75335	0.73153	0.73499	0.74391		0.92684	0.84962	0.80678	0.79931	0.79753
2.399	1.6887	1.4473	1.4015	1.3722		1.2987	1.0502	0.99727	1.0004	1.0122		1.3214	1.1745	1.1164	1.1029	1.0919
1.9699	1.4812	1.2969	1.2574	1.2309		1.1375	0.96373	0.91258	0.90722	0.90783		1.341	1.201	1.1015	1.0722	1.0498
1.6818	1.2521	1.0847	1.0497	1.029		0.92468	0.79404	0.75622	0.75429	0.75881		1.2682	1.1104	1.0193	0.99039	0.96571
2.4902	1.8372	1.5457	1.4701	1.4126		1.3795	1.1644	1.0749	1.0546	1.042		1.5514	1.3545	1.2371	1.2024	1.1761
2.4224	1.9321	1.6576	1.5776	1.5136		1.3052	1.1904	1.1352	1.1227	1.1166		1.4014	1.3373	1.2866	1.2705	1.2603
2.5924	1.9819	1.6815	1.599	1.5338		1.41	1.2352	1.1603	1.1428	1.1315		1.5014	1.3796	1.2847	1.2493	1.2182
2.4171	1.8696	1.5934	1.5157	1.453		1.3306	1.1769	1.105	1.086	1.0718		1.3427	1.2255	1.1391	1.112	1.0919
2.5818	1.8322	1.4585	1.3538	1.2712		1.3913	1.1354	1.0024	0.96535	0.93764		1.4855	1.2965	1.1718	1.1289	1.0919
2.5395	1.8466	1.4951	1.3942	1.3116		1.4183	1.162	1.0321	0.9958	0.96745		1.6605	1.3854	1.2197	1.1709	1.134
2.4362	1.7617	1.4557	1.3748	1.3116		1.3536	1.1173	1.0149	0.98829	0.96745		1.5025	1.2626	1.1041	1.0521	1.0078
2.3912	1.8568	1.5851	1.5106	1.453		1.3033	1.1596	1.0956	1.0809	1.0718		1.4364	1.3117	1.2281	1.2	1.1761
2.3512	1.8229	1.5572	1.479	1.4126		1.3295	1.1625	1.0841	1.0613	1.042		1.3177	1.1337	1.0024	0.95931	0.92366
2.4789	1.8777	1.6396	1.5802	1.5338		1.3991	1.2074	1.1494	1.1386	1.1315		1.4614	1.3164	1.2096	1.1705	1.134
2.5867	1.9296	1.6335	1.5624	1.5136		1.4324	1.2191	1.1373	1.1226	1.1166		1.567	1.3742	1.247	1.2078	1.1761
2.3192	1.8415	1.6273	1.5663	1.5136		1.3385	1.1911	1.1376	1.1255	1.1166		1.3582	1.2366	1.1733	1.153	1.134
2.3343	1.7581	1.4831	1.4096	1.352		1.3053	1.117	1.0323	1.0116	0.99727		1.3666	1.1878	1.0493	1.0033	0.96571
2.4004	1.7713	1.49	1.4281	1.3924		1.3282	1.1211	1.0396	1.0276	1.0271		1.6903	1.4628	1.3054	1.2564	1.2182
2.3418	1.8468	1.6135	1.5552	1.5136		1.3201	1.1831	1.1301	1.1205	1.1166		1.6868	1.4654	1.3071	1.2572	1.2182
2.3375	1.7491	1.508	1.4517	1.4126		1.3249	1.1222	1.0548	1.0447	1.042		1.2597	1.0914	1.0017	0.97994	0.96571
2.3322	1.8204	1.562	1.4896	1.4328		1.3248	1.1724	1.0958	1.074	1.0569		1.268	1.1248	1.0273	0.99412	0.96571
2.6	1.9102	1.6076	1.5237	1.453		1.4951	1.2448	1.134	1.1013	1.0718		1.2026	1.0441	0.94734	0.91351	0.88161
2.6763	1.9431	1.649	1.5814	1.5338		1.4957	1.2348	1.1467	1.1341	1.1315		1.5481	1.326	1.2123	1.188	1.1761
2.6363	1.9835	1.6465	1.5514	1.4732		1.4526	1.2362	1.1321	1.1058	1.0867		1.8786	1.6848	1.5129	1.4466	1.3866
1.7465	1.327	1.1826	1.1591	1.1501		1.0104	0.86474	0.83258	0.83646	0.84821		1.1031	0.99582	0.95618	0.95662	0.96571
2.0997	1.5865	1.3629	1.3094	1.2712		1.1385	0.98808	0.93986	0.93526	0.93764		1.3491	1.2495	1.1821	1.1567	1.134
2.0442	1.5147	1.3433	1.3114	1.2914		1.1968	0.99555	0.94823	0.94713	0.95254		0.96399	0.89058	0.86792	0.8714	0.88161
1.835	1.4063	1.2263	1.1824	1.1501		1.0295	0.90079	0.85953	0.85212	0.84821		0.81609	0.69568	0.6182	0.59876	0.58745
1.7831	1.3811	1.1976	1.1486	1.1097		1.0182	0.89651	0.84552	0.83116	0.81841		0.89626	0.79239	0.71725	0.69255	0.67146
1.9206	1.4183	1.1818	1.1187	1.0693		1.1004	0.92184	0.83406	0.80909	0.78861		0.75778	0.6558	0.60922	0.59723	0.58745
1.7553	1.356	1.1902	1.1461	1.1097		1.0085	0.88634	0.8406	0.82857	0.81841		0.86867	0.79943	0.78801	0.79143	0.79753
2.0816	1.5523	1.3662	1.3309	1.3116		1.2189	1.0125	0.95805	0.95752	0.96745		1.163	1.0488	1.0264	1.0343	1.0498
2.1594	1.6066	1.4234	1.3895	1.3722		1.2529	1.0576	1.0094	1.0071	1.0122		1.2185	1.0793	1.0685	1.0784	1.0919
2.2239	1.6622	1.4432	1.3909	1.352		1.3264	1.1184	1.0341	1.0131	0.99727		1.1437	0.92353	0.8488	0.84064	0.83957
2.4443	1.7333	1.4609	1.4124	1.3924		1.3774	1.1165	1.0277	1.0201	1.0271		1.2147	1.0765	1.0331	1.0361	1.0498
1.8317	1.4089	1.211	1.1556	1.1097		1.018	0.88809	0.83922	0.82758	0.81841		0.9725	0.85458	0.76602	0.73664	0.71348
1.9004	1.4911	1.3681	1.3526	1.352		1.1345	0.99555	0.97505	0.98245	0.99727		1.1555	1.0389	0.99682	0.99801	1.0078
1.7486	1.3775	1.1808	1.1281	1.0895		0.94764	0.85291	0.81189	0.80484	0.80351		1.0786	0.99151	0.92966	0.90529	0.88161
2.0548	1.5759	1.3959	1.35	1.3116		1.1935	1.0286	0.98049	0.9723	0.96745		1.0122	0.91185	0.90217	0.91073	0.92366
1.9267	1.5531	1.4069	1.3738	1.352		1.0976	1.006	0.98783	0.99019	0.99727		1.376	1.261	1.2056	1.1895	1.1761
2.3935	1.7763	1.5417	1.489	1.453		1.3532	1.1529	1.0877	1.0768	1.0718		1.5761	1.3405	1.2089	1.1688	1.134
2.9167	2.1586	1.7501	1.6313	1.5338		1.5538	1.3213	1.1956	1.1597	1.1315		1.5568	1.3922	1.2879	1.251	1.2182
2.4655	1.725	1.4885	1.4425	1.4126		1.3827	1.1097	1.0409	1.0369	1.042		1.3282	1.1435	1.1339	1.1511	1.1761
2.3682	1.7176	1.4952	1.4478	1.4126		1.4339	1.1544	1.0655	1.0504	1.042		1.3789	1.1766	1.0874	1.0662	1.0498
1.6622	1.2321	1.1149	1.1047	1.1097		0.93282	0.79409	0.78264	0.79628	0.81841		1.027	0.93006	0.95288	0.97803	1.0078
3.025	2.2526	1.8351	1.6992	1.5742		1.6369	1.3926	1.2542	1.2065	1.1613		1.5298	1.3101	1.1982	1.1637	1.134
2.5504	1.8369	1.5452	1.4709	1.4126		1.4436	1.1778	1.0772	1.0557	1.042		1.8431	1.5381	1.3433	1.2776	1.2182
2.3438	1.717	1.4125	1.3319	1.2712		1.2671	1.0724	0.97815	0.95422	0.93764		1.2713	1.1081	0.99405	0.95567	0.92366
2.7366	2.0316	1.7627	1.7152	1.6954		1.5489	1.3097	1.2392	1.2382	1.2508		1.7403	1.4785	1.3597	1.3439	1.3445
2.6608	2.032	1.7982	1.7486	1.7156		1.5082	1.3029	1.2546	1.2558	1.2658		1.4574	1.2737	1.1907	1.1781	1.1761
2.192	1.6409	1.3808	1.3091	1.2511		1.2449	1.05	0.96135	0.93894	0.92273		1.5442	1.3357	1.1868	1.1361	1.0919
2.5389	1.9111	1.62	1.5392	1.4732		1.4272	1.2155	1.1245	1.1024	1.0867		1.1908	1.0486	0.99671	0.98085	0.96571
1.9209	1.5253	1.3673	1.326	1.2914		1.1086	0.99274	0.95973	0.95478	0.95254		1.0144	0.86912	0.83201	0.83297	0.83957
2.3985	1.8677	1.6336	1.5686	1.5136		1.3802	1.2095	1.1471	1.1309	1.1166		1.4459	1.2412	1.1212	1.0832	1.0498
2.0784	1.5819	1.3269	1.2527	1.1905		1.2095	1.022	0.92617	0.89922	0.87802		1.5886	1.4458	1.3523	1.324	1.3024
2.2907	1.7812	1.584	1.541	1.5136		1.3238	1.1717	1.1243	1.1177	1.1166		1.4886	1.3053	1.2315	1.2204	1.2182
2.4373	1.7762	1.4348	1.3275	1.2309		1.3301	1.1075	0.98499	0.94467	0.90783		1.6722	1.4421	1.323	1.2883	1.2603
1.6908	1.3028	1.1349	1.0885	1.0492		0.94027	0.82718	0.79035	0.78156	0.77371		0.8469	0.76186	0.71051	0.69107	0.67146
2.2738	1.7639	1.4776	1.3814	1.2914		1.2641	1.1152	1.0214	0.98665	0.95254		0.9958	0.91614	0.87081	0.85469	0.83957
2.3047	1.782	1.5344	1.4593	1.3924		1.2835	1.1354	1.0693	1.0478	1.0271		0.97861	0.87925	0.84665	0.84134	0.83957
2.4616	1.8585	1.5409	1.4417	1.352		1.4447	1.2242	1.0882	1.0414	0.99727		1.2449	1.1129	1.0219	0.99196	0.96571
1.9593	1.5647	1.3575	1.2914	1.2309		1.1152	0.99517	0.94151	0.9244	0.90783		1.054	0.96282	0.95185	0.9576	0.96571
2.4591	1.8808	1.6234	1.5599	1.5136		1.3567	1.1898	1.1297	1.1199	1.1166		1.7624	1.5808	1.4723	1.4451	1.4287
2.3032	1.9058	1.6783	1.603	1.5338		1.2848	1.1965	1.1551	1.1424	1.1315		1.2354	1.1685	1.1272	1.11	1.0919
2.2484	1.8407	1.6228	1.5544	1.4934		1.303	1.194	1.1372	1.1187	1.1017		1.1993	1.0567	0.96754	0.94223	0.92366
2.5065	1.9317	1.6502	1.5738	1.5136		1.3877	1.2219	1.1455	1.1276	1.1166		1.3566	1.1964	1.094	1.0669	1.0498
2.5379	1.918	1.6115	1.5245	1.453		1.4121	1.217	1.1197	1.0928	1.0718		1.3328	1.181	1.095	1.0697	1.0498
2.6834	2.0058	1.6657	1.5705	1.4934		1.4719	1.2533	1.1503	1.1229	1.1017		1.5791	1.3596	1.2373	1.2027	1.1761
2.6677	2.0431	1.6884	1.5819	1.4934		1.4232	1.2476	1.1503	1.1225	1.1017		1.3849	1.2862	1.2038	1.1688	1.134
2.7735	2.1043	1.7703	1.6741	1.5944		1.5105	1.3112	1.2188	1.1944	1.1762		1.5635	1.3534	1.2551	1.2318	1.2182
2.7373	2.0563	1.7092	1.5972	1.4934		1.5639	1.322	1.189	1.144	1.1017		1.3608	1.1702	1.0909	1.0687	1.0498
2.0947	1.6268	1.4292	1.376	1.3318		1.2164	1.0637	1.0067	0.99287	0.98236		0.99799	0.90289	0.89266	0.90457	0.92366
2.6356	1.9708	1.7089	1.6597	1.6348		1.5313	1.2845	1.2027	1.1975	1.2061		1.2755	1.1812	1.1363	1.1315	1.134
2.0027	1.4951	1.3361	1.3072	1.2914		1.1397	0.97237	0.94179	0.94432	0.95254		1.2714	1.0834	1.0465	1.0465	1.0498
1.6015	1.1735	0.98062	0.92971	0.88768		0.87685	0.73494	0.67722	0.66417	0.65454		0.82784	0.71787	0.63855	0.61126	0.58745
2.6869	1.9832	1.6545	1.5715	1.5136		1.4616	1.2365	1.1392	1.1212	1.1166		1.5574	1.42	1.3839	1.3818	1.3866
2.5719	2.0602	1.7703	1.6701	1.5742		1.4598	1.3179	1.231	1.1968	1.1613		0.99311	0.92847	0.89912	0.88978	0.88161
2.6715	1.9994	1.6558	1.5572	1.4732		1.4806	1.2612	1.1477	1.1148	1.0867		1.7137	1.5114	1.339	1.2748	1.2182
2.4053	1.8615	1.622	1.5535	1.4934		1.3745	1.2155	1.1455	1.1232	1.1017		1.4783	1.2765	1.1617	1.125	1.0919
2.1925	1.6929	1.4452	1.3729	1.3116		1.2275	1.0913	1.0187	0.99298	0.96745		0.90006	0.83632	0.81457	0.80678	0.79753
2.214	1.7588	1.5789	1.5321	1.4934		1.2681	1.1515	1.118	1.1098	1.1017		1.1854	1.0267	0.98165	0.97315	0.96571
2.7675	1.9743	1.5854	1.4703	1.3722		1.5267	1.2429	1.0942	1.0495	1.0122		1.4425	1.2586	1.175	1.1519	1.134
2.5798	2.0075	1.7703	1.7145	1.6752		1.4317	1.2871	1.2417	1.2361	1.2359		1.572	1.4197	1.3652	1.3529	1.3445
2.5673	1.9773	1.6873	1.6043	1.5338		1.4713	1.265	1.1716	1.1484	1.1315		1.8081	1.6366	1.5267	1.4947	1.4708
2.6791	2.0133	1.6667	1.5556	1.453		1.5175	1.2902	1.1593	1.1145	1.0718		1.7612	1.5635	1.4142	1.3571	1.3024
2.573	1.9835	1.6618	1.5611	1.4732		1.4508	1.2577	1.1495	1.1155	1.0867		1.6493	1.505	1.4239	1.4017	1.3866
2.6963	2.0229	1.6728	1.5663	1.4732		1.5437	1.3006	1.1655	1.1234	1.0867		1.549	1.3927	1.2982	1.2746	1.2603
2.2662	1.7909	1.5491	1.4763	1.4126		1.2915	1.1439	1.0746	1.0561	1.042		1.5599	1.3399	1.2244	1.1954	1.1761
2.3356	1.8134	1.5618	1.4914	1.4328		1.3018	1.1412	1.0765	1.0635	1.0569		1.8235	1.6573	1.5632	1.5351	1.513
2.0578	1.5954	1.3415	1.2615	1.1905		1.1199	0.98966	0.9196	0.89752	0.87802		0.97786	0.89784	0.83634	0.815	0.79753
2.1382	1.5865	1.3255	1.2517	1.1905		1.1648	0.98673	0.91015	0.8913	0.87802		1.3353	1.1963	1.1098	1.0785	1.0498
2.0227	1.5009	1.2351	1.1491	1.0693		1.1119	0.94407	0.85267	0.82034	0.78861		1.0928	0.92733	0.84458	0.81933	0.79753
2.0763	1.5628	1.3321	1.2662	1.2107		1.1412	0.98845	0.92404	0.9067	0.89292		1.0768	0.99007	0.96971	0.96661	0.96571
1.9087	1.4751	1.3136	1.2769	1.2511		1.0964	0.95773	0.92099	0.91891	0.92273		1.0164	0.9218	0.94962	0.97581	1.0078
2.0999	1.5846	1.3792	1.3289	1.2914		1.1669	1.0116	0.96226	0.95474	0.95254		1.1273	1.0308	1.0104	1.0083	1.0078
2.0978	1.5865	1.3945	1.3479	1.3116		1.2126	1.0325	0.97867	0.97049	0.96745		1.1529	1.1059	1.163	1.1917	1.2182
2.2801	1.6308	1.3277	1.2345	1.1501		1.2603	1.0256	0.91365	0.87915	0.84821		1.2099	0.92132	0.80864	0.77925	0.7555
2.1806	1.6186	1.3793	1.3109	1.2511		1.2265	1.0409	0.96272	0.94112	0.92273		1.1467	1.0002	0.92795	0.90391	0.88161
1.9609	1.4568	1.2159	1.1468	1.0895		1.0727	0.91222	0.83805	0.81826	0.80351		1.1212	0.98331	0.91707	0.89742	0.88161
2.7335	1.8301	1.4585	1.3568	1.2712		1.5411	1.1792	1.02	0.97548	0.93764		2.0409	1.2718	0.97367	0.89835	0.83957
2.459	1.7447	1.4326	1.3452	1.2712		1.3575	1.1124	0.99903	0.96613	0.93764		1.5114	1.2619	1.1276	1.0858	1.0498
1.8929	1.4854	1.2684	1.204	1.1501		1.0335	0.92847	0.87472	0.85968	0.84821		0.92775	0.84687	0.78818	0.76947	0.7555
2.02	1.5318	1.294	1.2258	1.1703		1.109	0.9645	0.89732	0.87827	0.86311		0.88613	0.75791	0.69743	0.68193	0.67146
1.8899	1.3497	1.1145	1.0546	1.0088		1.0098	0.83553	0.76636	0.75204	0.74391		1.1118	0.92629	0.81915	0.78486	0.7555
1.7	1.2903	1.0962	1.0455	1.0088		0.95296	0.82396	0.76543	0.75177	0.74391		1.0029	0.92295	0.87121	0.85385	0.83957
2.0789	1.6754	1.4956	1.4415	1.3924		1.2287	1.1107	1.0595	1.043	1.0271		0.74812	0.67111	0.65762	0.66243	0.67146
1.8865	1.392	1.1599	1.1054	1.0693		1.039	0.87841	0.80712	0.79369	0.78861		0.87717	0.79715	0.73958	0.72367	0.71348
1.5945	1.2784	1.1339	1.097	1.0693		0.86629	0.79788	0.78302	0.78419	0.78861		0.79644	0.74907	0.72871	0.7212	0.71348
1.8413	1.388	1.2138	1.1755	1.1501		1.0291	0.89469	0.85443	0.84913	0.84821		0.90107	0.72275	0.69561	0.70191	0.71348
2.268	1.5757	1.3727	1.3354	1.3116		1.2614	1.0038	0.95498	0.95733	0.96745		1.4387	1.2559	1.2062	1.1914	1.1761
2.3826	1.6174	1.334	1.2726	1.2309		1.3327	1.0352	0.93334	0.91591	0.90783		1.706	1.3339	1.1143	1.0536	1.0078
2.003	1.4594	1.2671	1.2308	1.2107		1.1451	0.94425	0.88977	0.88711	0.89292		1.1791	1.0537	1.0079	1.0044	1.0078
1.6767	1.2189	1.0417	0.9997	0.96841		0.93796	0.78204	0.72961	0.71979	0.71412		0.75964	0.6613	0.60721	0.59463	0.58745
2.3167	1.7325	1.483	1.4196	1.3722		1.3029	1.1028	1.0297	1.0167	1.0122		1.7649	1.4773	1.3734	1.354	1.3445
2.0022	1.4302	1.1444	1.0603	0.9886		1.1424	0.91944	0.79907	0.76171	0.72902		1.1392	0.99656	0.90305	0.8702	0.83957
2.0839	1.5686	1.3545	1.2982	1.2511		1.1439	0.98819	0.9374	0.92824	0.92273		1.3537	1.2787	1.2233	1.1997	1.1761
2.3643	1.9126	1.6499	1.5596	1.4732		1.339	1.2191	1.1463	1.1174	1.0867		1.1541	1.0462	0.98839	0.97448	0.96571
2.9703	2.0592	1.7102	1.6233	1.554		1.648	1.3023	1.1888	1.1647	1.1464		1.9793	1.5369	1.2729	1.1795	1.0919
2.6849	1.8907	1.5929	1.5239	1.4732		1.5007	1.2064	1.1136	1.0969	1.0867		1.8938	1.5769	1.3887	1.3229	1.2603
2.3511	1.8229	1.5845	1.5147	1.453		1.3366	1.1756	1.1099	1.0903	1.0718		1.2312	1.0889	1.0071	0.98382	0.96571
2.2849	1.7609	1.5519	1.4973	1.453		1.3155	1.1492	1.0964	1.0835	1.0718		0.87979	0.81554	0.80121	0.79944	0.79753
2.1908	1.7171	1.4921	1.4276	1.3722		1.2532	1.1154	1.0507	1.0307	1.0122		1.1027	1.0035	0.95545	0.93947	0.92366
2.4711	1.8741	1.6082	1.5349	1.4732		1.4472	1.2405	1.1434	1.1139	1.0867		1.8303	1.3352	1.11	1.0531	1.0078
2.3343	1.7592	1.495	1.4185	1.352		1.3734	1.1659	1.0607	1.0274	0.99727		1.207	0.96416	0.87187	0.85274	0.83957
2.6029	1.937	1.7242	1.6903	1.6752		1.4865	1.2628	1.218	1.2227	1.2359		1.5341	1.3617	1.2995	1.2965	1.3024
2.4588	1.9365	1.6729	1.5901	1.5136		1.3735	1.2292	1.1605	1.1382	1.1166		1.1109	1.0326	0.98735	0.97477	0.96571
2.6422	2.0997	1.7989	1.7089	1.6348		1.4691	1.3225	1.2445	1.2224	1.2061		1.6173	1.4873	1.3946	1.3653	1.3445
2.5133	1.8496	1.5454	1.4544	1.3722		1.4526	1.2085	1.0875	1.0487	1.0122		1.4375	1.2062	1.0567	1.0084	0.96571
2.0328	1.5536	1.3727	1.328	1.2914		1.2051	1.0265	0.97167	0.9608	0.95254		1.0013	0.90946	0.86463	0.85157	0.83957
2.6035	2.0492	1.8497	1.8132	1.7964		1.513	1.345	1.3089	1.3128	1.3255		1.5576	1.4608	1.4309	1.4281	1.4287
2.7307	1.8871	1.4152	1.2784	1.1703		1.4182	1.1247	0.95332	0.90231	0.86311		1.171	0.99749	0.89861	0.86609	0.83957
2.254	1.5961	1.3912	1.354	1.3318		1.3031	1.0424	0.9801	0.9772	0.98236		1.2369	1.0707	0.99692	0.97888	0.96571
2.4806	1.9208	1.6484	1.5806	1.5338		1.4757	1.2777	1.1758	1.1495	1.1315		1.2042	1.0736	1.0516	1.0505	1.0498
1.9793	1.4452	1.2682	1.2402	1.2309		1.1338	0.93497	0.89099	0.89443	0.90783		1.0496	0.90448	0.86465	0.8684	0.88161
2.1209	1.5825	1.4025	1.3694	1.352		1.2529	1.0605	1.0035	0.99689	0.99727		1.4747	1.1284	0.99803	0.97646	0.96571
2.4956	1.908	1.5816	1.4734	1.3722		1.4055	1.215	1.0966	1.0538	1.0122		1.1672	1.037	0.96152	0.94007	0.92366
2.6431	2.0995	1.7801	1.6732	1.5742		1.4479	1.3086	1.2242	1.1928	1.1613		1.3881	1.2505	1.1565	1.1228	1.0919
2.5492	2.0168	1.7792	1.7192	1.6752		1.4343	1.2915	1.2421	1.2355	1.2359		1.4505	1.4003	1.3873	1.3861	1.3866
2.065	1.5681	1.3709	1.3318	1.3116		1.2154	1.0292	0.96647	0.96149	0.96745		1.6284	1.3672	1.2209	1.19	1.1761
2.694	1.846	1.542	1.4845	1.453		1.553	1.1942	1.082	1.0698	1.0718		1.4643	1.2272	1.0692	1.0302	1.0078
2.5923	1.9375	1.6132	1.5243	1.453		1.4378	1.2363	1.1307	1.099	1.0718		1.3406	1.1759	1.0497	1.0052	0.96571
2.6565	2.0815	1.8068	1.7262	1.655		1.5019	1.3354	1.2614	1.24	1.221		1.799	1.5915	1.4435	1.3918	1.3445
2.6386	2.0153	1.7133	1.6269	1.554		1.4639	1.2744	1.1886	1.1654	1.1464		1.6558	1.4673	1.34	1.2971	1.2603
2.6875	1.9495	1.6089	1.5134	1.4328		1.5037	1.2477	1.124	1.0881	1.0569		1.8542	1.5373	1.3347	1.2713	1.2182
2.3171	1.765	1.5061	1.433	1.3722		1.3213	1.1364	1.0525	1.0299	1.0122		1.1972	1.0735	1.0496	1.0486	1.0498
2.263	1.7855	1.5223	1.4346	1.352		1.3514	1.1888	1.0819	1.0402	0.99727		1.0124	0.88575	0.8068	0.78024	0.7555
2.3058	1.6991	1.4593	1.3918	1.3318		1.381	1.1469	1.0446	1.0126	0.98236		1.5023	1.0452	0.87654	0.83346	0.79753
2.0076	1.4944	1.2829	1.2375	1.2107		1.1676	0.97716	0.90555	0.89462	0.89292		1.2785	1.0637	0.93697	0.90443	0.88161
1.8819	1.5112	1.3203	1.2615	1.2107		1.0809	0.9786	0.92737	0.9096	0.89292		0.68019	0.65377	0.63697	0.63217	0.62945
2.1255	1.6142	1.38	1.3118	1.2511		1.1873	1.026	0.96085	0.94152	0.92273		0.85361	0.77211	0.73802	0.72637	0.71348
2.9451	2.1385	1.6938	1.5616	1.453		1.5541	1.2929	1.1471	1.1045	1.0718		1.8475	1.6373	1.4935	1.439	1.3866
2.7017	1.9244	1.6138	1.5434	1.4934		1.5013	1.2269	1.13	1.1122	1.1017		1.5495	1.3598	1.2866	1.2719	1.2603
2.5667	1.9884	1.7483	1.6853	1.6348		1.508	1.3131	1.2379	1.2197	1.2061		1.1336	0.99875	0.96048	0.96019	0.96571
2.5656	1.9866	1.6892	1.6038	1.5338		1.4201	1.2505	1.1686	1.1471	1.1315		1.5476	1.3679	1.2497	1.2099	1.1761
2.494	1.8978	1.6178	1.5393	1.4732		1.3785	1.1973	1.1203	1.1013	1.0867		1.5558	1.3425	1.2101	1.1688	1.134
2.3367	1.612	1.4114	1.3838	1.3722		1.4144	1.083	1.0072	1.0052	1.0122		1.9169	1.564	1.3878	1.3411	1.3024
2.574	1.9583	1.6815	1.6024	1.5338		1.5079	1.2812	1.1833	1.1556	1.1315		1.3215	1.1293	1.091	1.0899	1.0919
2.6764	1.9195	1.5838	1.4913	1.4126		1.4804	1.2169	1.1028	1.0707	1.042		1.6054	1.3856	1.229	1.1777	1.134
2.6097	2.0668	1.8219	1.7603	1.7156		1.531	1.3592	1.2885	1.2736	1.2658		1.3633	1.2416	1.202	1.2055	1.2182
2.5498	1.9824	1.7676	1.7231	1.6954		1.4741	1.2928	1.2461	1.2446	1.2508		1.6894	1.4205	1.3117	1.2997	1.3024
2.4415	1.9272	1.7111	1.6568	1.6146		1.4226	1.2594	1.2049	1.1956	1.1912		1.462	1.2665	1.1886	1.178	1.1761
2.3465	1.8402	1.6053	1.5427	1.4934		1.3648	1.1979	1.1285	1.1124	1.1017		1.4374	1.2791	1.159	1.1216	1.0919
2.3913	1.7996	1.5234	1.45	1.3924		1.3265	1.1341	1.0546	1.0374	1.0271		1.7887	1.5203	1.3368	1.274	1.2182
2.2523	1.6491	1.4802	1.4511	1.4328		1.3285	1.0907	1.0503	1.0517	1.0569		1.2944	1.1976	1.175	1.1582	1.134
2.5205	1.7055	1.3603	1.2747	1.2107		1.3742	1.0785	0.94709	0.9154	0.89292		0.78449	0.66873	0.65856	0.66387	0.67146
2.279	1.5649	1.286	1.2192	1.1703		1.264	1.0077	0.90671	0.88211	0.86311		1.5863	1.0439	0.83788	0.78995	0.7555
2.4516	1.6911	1.3892	1.3122	1.2511		1.3593	1.0794	0.97018	0.9436	0.92273		1.4151	0.9369	0.79242	0.76838	0.7555
2.2609	1.6375	1.4096	1.3545	1.3116		1.2895	1.0685	0.99507	0.97926	0.96745		0.86673	0.79317	0.81507	0.82809	0.83957
2.0973	1.529	1.2645	1.1834	1.1097		1.2415	1.0168	0.89871	0.85814	0.81841		0.69932	0.47432	0.42759	0.42192	0.41949
2.7368	1.8098	1.4098	1.3006	1.2107		1.5363	1.1612	0.98374	0.93396	0.89292		2.1405	1.2863	1.0204	0.96341	0.92366
1.9498	1.4443	1.2477	1.2022	1.1703		1.0931	0.92806	0.87474	0.86627	0.86311		1.0695	0.96205	1.0012	1.0261	1.0498
2.1829	1.5221	1.3058	1.2615	1.2309		1.2506	0.995	0.92445	0.91377	0.90783		1.235	1.0795	1.0122	0.98951	0.96571
1.9889	1.4841	1.2451	1.1735	1.1097		1.1029	0.93628	0.86199	0.83943	0.81841		0.92928	0.77099	0.66215	0.62325	0.58745
2.4098	1.619	1.3189	1.2467	1.1905		1.363	1.0402	0.92211	0.89638	0.87802		1.3889	1.172	1.021	0.96949	0.92366
1.9656	1.4603	1.2262	1.1616	1.1097		1.0916	0.92144	0.84808	0.83031	0.81841		1.2063	1.1104	1.0468	1.0253	1.0078
1.7629	1.4012	1.2376	1.1907	1.1501		1.0122	0.91665	0.87413	0.86079	0.84821		0.85389	0.76616	0.75092	0.75217	0.7555
1.9512	1.4432	1.2533	1.2069	1.1703		1.1415	0.95356	0.88802	0.87363	0.86311		1.0186	0.88328	0.87491	0.87849	0.88161
1.8871	1.4098	1.2096	1.1553	1.1097		1.0643	0.9108	0.84868	0.83221	0.81841		0.63724	0.61016	0.64082	0.65637	0.67146
1.8765	1.4241	1.2239	1.1714	1.1299		1.0465	0.90787	0.85324	0.84128	0.83331		0.67696	0.64472	0.67557	0.69433	0.71348
1.9411	1.4471	1.2548	1.2074	1.1703		1.109	0.92966	0.87537	0.86689	0.86311		0.99919	0.88202	0.83387	0.8166	0.79753
2.2722	1.8274	1.6258	1.566	1.5136		1.3203	1.2007	1.1489	1.1323	1.1166		0.86475	0.80181	0.81048	0.82337	0.83957
3.0263	2.1242	1.7209	1.6238	1.554		1.6664	1.3318	1.1916	1.1628	1.1464		1.6686	1.4209	1.2407	1.1818	1.134
2.7538	1.833	1.5487	1.5072	1.4934		1.7286	1.2687	1.1214	1.1031	1.1017		2.627	1.8896	1.5328	1.4668	1.4287
2.7632	2.0927	1.7291	1.615	1.5136		1.5319	1.3111	1.1887	1.1501	1.1166		1.4414	1.3079	1.2487	1.2321	1.2182
2.6404	1.9396	1.6375	1.5579	1.4934		1.4832	1.2405	1.1439	1.1203	1.1017		1.4972	1.3004	1.1926	1.1608	1.134
2.9639	2.0662	1.5833	1.4592	1.3722		1.5419	1.2453	1.0815	1.0396	1.0122		1.6716	1.4219	1.2321	1.1588	1.0919
2.9145	2.0139	1.7068	1.6552	1.6348		1.6811	1.3173	1.2069	1.1979	1.2061		2.0696	1.5125	1.3563	1.342	1.3445
1.9329	1.5211	1.3206	1.2544	1.1905		1.0816	0.96548	0.91609	0.89791	0.87802		0.6805	0.62489	0.59915	0.5925	0.58745
3.2135	2.3518	1.9187	1.7882	1.6752		1.7886	1.4822	1.3242	1.2765	1.2359		1.9998	1.6472	1.4943	1.456	1.4287
3.1297	2.3135	1.9269	1.8205	1.7358		1.732	1.465	1.3392	1.3057	1.2807		1.7138	1.4839	1.3866	1.3617	1.3445
3.1473	2.341	1.9391	1.8191	1.7156		1.7524	1.4797	1.3428	1.3014	1.2658		1.502	1.3411	1.2636	1.2393	1.2182
2.8879	2.1978	1.8637	1.7703	1.6954		1.6212	1.4008	1.2973	1.2703	1.2508		1.6207	1.4276	1.3429	1.3199	1.3024
3.0527	2.31	1.9471	1.8428	1.756		1.7267	1.4693	1.3496	1.3184	1.2956		2.1654	1.7684	1.6274	1.6044	1.5972
2.9543	2.2552	1.8978	1.7894	1.6954		1.6393	1.4213	1.312	1.2791	1.2508		1.2612	1.1319	1.1143	1.1212	1.134
2.31	1.7483	1.5409	1.4985	1.4732		1.3295	1.133	1.0815	1.0798	1.0867		1.4274	1.2518	1.1605	1.1421	1.134
2.8914	2.0896	1.6858	1.555	1.4328		1.7034	1.3767	1.1878	1.1214	1.0569		1.0891	0.76556	0.64315	0.61213	0.58745
2.8971	2.0489	1.6392	1.5104	1.3924		1.6582	1.3272	1.1477	1.0862	1.0271		0.79602	0.67242	0.61837	0.60192	0.58745
1.9556	1.3008	1.0771	1.0339	1.0088		1.1358	0.85403	0.76215	0.74818	0.74391		1.121	0.81678	0.75115	0.7497	0.7555
1.7283	1.2594	1.1194	1.1051	1.1097		1.0472	0.85036	0.80308	0.80552	0.81841		1.7092	1.2446	1.0748	1.0539	1.0498
1.7303	1.2954	1.1453	1.1129	1.0895		1.02	0.86103	0.8159	0.80821	0.80351		0.78177	0.70247	0.67731	0.67363	0.67146
1.3734	1.1109	0.98154	0.94226	0.90786		0.8371	0.74791	0.7009	0.68473	0.66944		0.57213	0.51357	0.50207	0.50223	0.50345
1.886	1.2428	1.067	1.0413	1.029		1.0617	0.80236	0.74866	0.74995	0.75881		1.0905	0.87666	0.83006	0.83201	0.83957
1.5773	1.1325	0.97398	0.93659	0.90786		0.90189	0.74129	0.68812	0.67702	0.66944		0.48612	0.44331	0.46535	0.48327	0.50345
1.6992	1.188	1.014	0.97616	0.94823		0.98379	0.77412	0.71137	0.70235	0.69922		1.0835	0.84807	0.72776	0.69607	0.67146
1.9939	1.3897	1.2294	1.2043	1.1905		1.1547	0.91414	0.8682	0.86984	0.87802		1.3837	1.0433	0.98846	0.99443	1.0078
1.3139	0.92543	0.74376	0.69862	0.66568		0.70845	0.57948	0.51881	0.50296	0.49077		0.7057	0.59226	0.50735	0.48129	0.46147
1.3046	1.0326	0.91151	0.87725	0.84731		0.73661	0.66161	0.63551	0.6295	0.62476		0.77466	0.68224	0.64096	0.63309	0.62945
2.8247	1.9256	1.4957	1.38	1.2914		1.5211	1.1968	1.0302	0.98524	0.95254		1.3633	1.2171	1.1597	1.1449	1.134
2.4366	1.6254	1.3733	1.3242	1.2914		1.4471	1.0698	0.96615	0.95394	0.95254		2.0161	1.5952	1.3194	1.2404	1.1761
2.8421	2.1441	1.7882	1.6832	1.5944		1.5625	1.3552	1.2399	1.2051	1.1762		1.6765	1.5136	1.4064	1.372	1.3445
2.7437	2.0936	1.735	1.6192	1.5136		1.5259	1.3248	1.1996	1.1565	1.1166		1.7404	1.5994	1.4981	1.4617	1.4287
2.5259	1.9112	1.6674	1.6048	1.554		1.4839	1.2702	1.1843	1.1629	1.1464		1.1484	0.9867	0.97373	0.98759	1.0078
2.7103	2.0712	1.7739	1.6954	1.6348		1.5357	1.3203	1.2329	1.2151	1.2061		1.8941	1.664	1.5237	1.4749	1.4287
2.8449	2.0623	1.6749	1.5644	1.4732		1.5669	1.2904	1.1542	1.1164	1.0867		1.2253	1.0476	0.94741	0.91319	0.88161
2.9847	2.1656	1.8144	1.7473	1.7156		1.6501	1.3712	1.2643	1.2555	1.2658		1.6443	1.499	1.4309	1.4237	1.4287
2.8808	2.1034	1.7969	1.7258	1.6752		1.6509	1.3681	1.2691	1.2491	1.2359		1.5918	1.3895	1.2497	1.2082	1.1761
2.4813	1.9539	1.6987	1.6219	1.554		1.4181	1.2591	1.1864	1.1651	1.1464		1.453	1.3104	1.2268	1.2	1.1761
2.8436	2.0652	1.7238	1.6384	1.5742		1.5927	1.307	1.1955	1.1734	1.1613		2.2298	1.932	1.7287	1.6592	1.5972
2.9217	2.2645	1.9564	1.8769	1.8166		1.6373	1.4493	1.3713	1.3531	1.3404		1.5583	1.4261	1.366	1.3531	1.3445
2.9001	2.1793	1.7913	1.6814	1.5944		1.5711	1.3416	1.2265	1.1967	1.1762		1.5997	1.4261	1.2786	1.2235	1.1761
3.1801	2.293	1.8199	1.6763	1.554		1.7087	1.4156	1.2472	1.1933	1.1464		1.4691	1.3001	1.2033	1.1678	1.134
3.3615	2.4555	2.0292	1.897	1.7762		1.9053	1.5746	1.4096	1.3576	1.3105		1.9272	1.5531	1.411	1.3743	1.3445
2.1621	1.5505	1.3213	1.2618	1.2107		1.2952	1.0378	0.94036	0.91486	0.89292		0.81228	0.67213	0.63072	0.62792	0.62945
2.3041	1.6188	1.3944	1.3537	1.3318		1.3506	1.075	0.99401	0.98379	0.98236		1.3242	1.0268	0.87977	0.85294	0.83957
2.7366	1.9269	1.5531	1.4377	1.3318		1.5767	1.2587	1.0936	1.0373	0.98236		0.6978	0.44299	0.38956	0.38169	0.37751
2.9612	2.1363	1.7787	1.6721	1.5742		1.683	1.381	1.2423	1.2001	1.1613		0.99373	0.91948	0.93807	0.95153	0.96571
2.8038	1.9344	1.5119	1.4145	1.352		1.5038	1.1866	1.0364	1.0079	0.99727		1.9459	1.6861	1.4749	1.4021	1.3445
2.8337	2.1667	1.8266	1.7388	1.6752		1.677	1.4329	1.2984	1.262	1.2359		1.2268	1.067	1.0137	1.0083	1.0078
3.0702	2.2637	1.8269	1.6927	1.5742		1.6677	1.3996	1.2495	1.2026	1.1613		1.9145	1.696	1.5318	1.4755	1.4287
2.8613	2.17	1.8094	1.6966	1.5944		1.5838	1.3709	1.2549	1.215	1.1762		1.7325	1.4716	1.2899	1.2287	1.1761
2.1134	1.6409	1.4081	1.3435	1.2914		1.215	1.0741	0.99809	0.974	0.95254		0.57837	0.53151	0.51313	0.5081	0.50345
3.0148	2.2555	1.8642	1.7356	1.6146		1.7655	1.4749	1.3072	1.2482	1.1912		1.3231	1.1797	1.1244	1.1075	1.0919
2.948	2.1387	1.7722	1.6741	1.5944		1.7062	1.3871	1.2425	1.2052	1.1762		1.9218	1.6169	1.4116	1.3504	1.3024
2.9617	2.3025	1.9645	1.8634	1.7762		1.6547	1.462	1.3645	1.3353	1.3105		1.7821	1.6818	1.5859	1.5477	1.513
3.2373	2.3859	1.9046	1.751	1.6146		1.7626	1.4778	1.3044	1.2453	1.1912		1.8541	1.6281	1.4662	1.404	1.3445
2.8636	2.078	1.6841	1.5622	1.453		1.7344	1.3908	1.2009	1.1353	1.0718		0.76189	0.65488	0.60976	0.59743	0.58745
1.8773	1.3799	1.2232	1.199	1.1905		1.0524	0.89066	0.86087	0.86593	0.87802		1.8369	1.3043	1.1888	1.1787	1.1761
3.0707	2.2928	1.9863	1.9129	1.857		1.8924	1.5561	1.4237	1.3929	1.3703		1.5452	1.2994	1.2052	1.1875	1.1761
1.9465	1.3036	1.1034	1.0606	1.029		1.175	0.88088	0.79088	0.7723	0.75881		0.83391	0.63519	0.561	0.54998	0.54545
2.9495	2.1887	1.8524	1.7642	1.6954		1.7015	1.4231	1.3038	1.2736	1.2508		2.0667	1.7534	1.5457	1.4811	1.4287
1.9132	1.161	0.83229	0.74113	0.66568		1.0677	0.73569	0.57388	0.52798	0.49077		0.37866	0.32805	0.32638	0.33018	0.33554
2.2407	1.6576	1.4445	1.4001	1.3722		1.5581	1.299	1.1739	1.1444	1.1253		1.13	1.076	1.0767	1.0806	1.0839
2.0033	1.4676	1.2884	1.2458	1.2107		1.3177	1.1142	1.0248	0.99846	0.97448		1.0322	0.91336	0.85783	0.84329	0.83125
1.7942	1.2464	1.0832	1.0587	1.0492		1.0351	0.8836	0.83187	0.82692	0.82916		1.069	1.0723	1.081	1.0829	1.0839
2.0022	1.411	1.247	1.2223	1.2107		1.1408	1.001	0.97019	0.97034	0.97448		0.96646	0.89655	0.90481	0.91727	0.93038
2.5509	1.8539	1.6245	1.573	1.5338		1.6306	1.4144	1.323	1.2998	1.2819		1.3218	1.2116	1.1842	1.1844	1.1895
2.1604	1.602	1.3995	1.3508	1.3116		1.327	1.1839	1.1091	1.0871	1.0681		1.337	1.2121	1.1535	1.1421	1.1364
2.3712	1.6784	1.4442	1.3919	1.352		1.4078	1.225	1.1437	1.1229	1.1061		1.4256	1.3096	1.2059	1.1687	1.1364
1.1949	0.90802	0.86358	0.86332	0.86749		0.73358	0.65387	0.65654	0.66363	0.67188		0.78854	0.67144	0.64423	0.64134	0.64024
1.6262	0.99708	0.85926	0.83911	0.82713		1.0519	0.87679	0.84573	0.84875	0.85672		1.1816	0.93915	0.89815	0.90246	0.9113
1.5356	1.0686	0.95088	0.92744	0.90786		1.1034	0.96551	0.9421	0.9411	0.9411		1.6754	1.2779	1.1123	1.077	1.053
1.5968	1.0023	0.85039	0.81639	0.78676		1.0467	0.88558	0.83773	0.82597	0.81458		0.87319	0.71542	0.6584	0.64332	0.6291
1.7568	1.1464	0.97266	0.93607	0.90786		1.2092	1.0224	0.95956	0.94801	0.9411		1.0894	0.95344	0.91447	0.9109	0.9113
1.5676	1.0546	0.91814	0.89011	0.86749		1.2168	0.98762	0.91879	0.9066	0.89889		1.4351	1.1124	1.0035	0.98827	0.9821
1.5384	1.0052	0.84669	0.81267	0.78676		0.99127	0.86404	0.82592	0.819	0.81458		0.64629	0.62192	0.62515	0.62763	0.6291
1.7786	1.0934	0.91104	0.8745	0.84731		1.0029	0.90142	0.87895	0.87734	0.8778		0.9735	0.82625	0.77129	0.7666	0.77
1.8419	1.1462	0.97833	0.94867	0.92804		1.0436	0.94903	0.94621	0.95335	0.96222		0.83737	0.81896	0.86596	0.88886	0.9113
1.8643	1.0939	0.89213	0.85387	0.82713		1.1528	0.9382	0.87118	0.86106	0.85672		1.2672	1.092	1.0132	0.99552	0.9821
2.0686	1.2538	1.0333	0.97819	0.92804		1.5792	1.1907	1.0398	0.99881	0.96222		0.87454	0.58849	0.51556	0.50057	0.4886
1.9903	1.2946	1.0822	1.0242	0.96841		1.373	1.1558	1.0685	1.0378	1.0045		0.57162	0.40745	0.36133	0.35354	0.34851
2.5305	1.3634	1.1038	1.0598	1.029		1.5167	1.185	1.0882	1.0746	1.0679		1.0142	0.77248	0.65806	0.63836	0.6291
2.3306	1.2861	1.0375	0.99536	0.96841		1.4694	1.1324	1.0246	1.0095	1.0045		1.3758	1.1518	1.0675	1.0565	1.053
2.0244	1.2768	1.0594	1.0098	0.96841		1.2388	1.0884	1.0336	1.0188	1.0045		0.5451	0.47727	0.47403	0.4801	0.4886
2.0976	1.3539	1.1487	1.1044	1.0693		1.4039	1.2045	1.1352	1.1206	1.1103		1.6257	1.1774	1.015	0.99123	0.9821
1.9298	1.2493	1.0379	0.98861	0.94823		1.1813	1.0578	1.0084	0.99517	0.98335		1.0835	0.94001	0.86906	0.85208	0.8406
2.0938	1.2377	0.95735	0.89485	0.84731		1.1027	0.97006	0.90764	0.89133	0.8778		0.87082	0.78602	0.73118	0.71422	0.6995
1.862	1.1599	0.92308	0.86903	0.82713		1.0617	0.94615	0.88651	0.87019	0.85672		1.4234	1.292	1.193	1.1574	1.124
2.1132	1.1972	0.90389	0.83785	0.78676		1.0037	0.90418	0.8494	0.83161	0.81458		1.0341	0.88545	0.76715	0.72944	0.6995
2.4869	1.4121	1.0773	1.0038	0.94823		1.2996	1.1103	1.0233	1.0011	0.98335		1.2371	1.0525	0.91862	0.87609	0.8406
2.3005	1.4306	1.1982	1.1489	1.1097		1.2483	1.173	1.1592	1.1565	1.1527		1.1344	0.93707	0.85066	0.84022	0.8406
2.5882	1.3203	0.94917	0.8761	0.82713		1.1823	0.98478	0.88903	0.86863	0.85672		1.0852	0.91119	0.84556	0.83916	0.8406
2.4537	1.2974	0.95305	0.8803	0.82713		1.1719	0.98448	0.89717	0.87467	0.85672		1.0939	0.9477	0.86984	0.85172	0.8406
2.2651	1.261	0.98089	0.92575	0.88768		1.2234	1.0152	0.9396	0.92638	0.91999		1.2773	1.0211	0.88969	0.85908	0.8406
2.6215	1.386	1.0019	0.9228	0.86749		1.3118	1.0664	0.94543	0.91749	0.89889		1.2028	1.0279	0.90128	0.86605	0.8406
2.3438	1.2911	1.0284	0.98059	0.94823		1.2779	1.0669	0.99442	0.98505	0.98335		1.5856	1.2599	1.1463	1.1311	1.124
1.8677	1.0927	0.85556	0.80454	0.76658		1.1183	0.92091	0.83014	0.80875	0.79352		1.3613	1.1602	1.0018	0.95249	0.9113
1.7943	1.2076	1.0058	0.96083	0.92804		1.1291	1.0247	0.97747	0.96737	0.96222		1.2023	1.1062	1.0643	1.0563	1.053
1.9882	1.2302	0.95118	0.88977	0.84731		1.1732	1.0026	0.91113	0.88994	0.8778		1.4523	1.3266	1.2442	1.2171	1.1951
1.7625	1.1274	0.8996	0.84652	0.80694		1.1208	0.95432	0.87136	0.85031	0.83564		1.0674	0.93959	0.90873	0.90775	0.9113
2.3507	1.4288	1.1273	1.0521	0.9886		1.3255	1.1677	1.0845	1.0551	1.0256		1.0658	0.90506	0.80901	0.78534	0.77
2.3089	1.3586	1.0958	1.0446	1.0088		1.2959	1.1203	1.058	1.0492	1.0468		1.4993	1.313	1.226	1.2078	1.1951
3.5404	1.5943	1.0791	0.98613	0.92804		1.5199	1.1734	1.0101	0.97832	0.96222		2.077	1.7148	1.456	1.3853	1.3376
2.0391	1.3177	1.0945	1.0457	1.0088		1.2636	1.1141	1.0618	1.0521	1.0468		1.296	1.2223	1.1967	1.194	1.1951
2.3891	1.346	1.0502	0.99049	0.94823		1.2691	1.0807	1.0057	0.99137	0.98335		1.3379	1.1051	0.97083	0.93595	0.9113
2.1072	1.2362	0.96985	0.91171	0.86749		1.1291	0.99002	0.9269	0.91117	0.89889		0.92076	0.84634	0.8373	0.83891	0.8406
2.084	1.2402	0.9713	0.91198	0.86749		1.2397	1.0346	0.93953	0.91612	0.89889		1.5744	1.3341	1.2357	1.2125	1.1951
1.9104	1.2861	1.0741	1.0257	0.9886		1.1645	1.0775	1.0392	1.0307	1.0256		1.1348	1.0922	1.0639	1.0568	1.053
2.1578	1.2942	1.012	0.95126	0.90786		1.199	1.039	0.96648	0.95063	0.9411		1.3813	1.2309	1.1228	1.0856	1.053
1.6745	1.0824	0.89854	0.85813	0.82713		0.94982	0.88806	0.8648	0.85996	0.85672		0.69587	0.66282	0.64018	0.63366	0.6291
2.051	1.2506	0.98619	0.92162	0.86749		1.2002	1.0288	0.94811	0.92302	0.89889		0.48702	0.46309	0.47592	0.48293	0.4886
1.5845	1.06	0.86699	0.82873	0.80694		1.0066	0.88775	0.83556	0.83047	0.83564		1.1861	1.1554	1.131	1.1251	1.124
1.9053	1.1899	0.91667	0.84569	0.78676		1.1319	0.97133	0.87609	0.84423	0.81458		0.65833	0.571	0.51912	0.50275	0.4886
2.088	1.1339	0.8596	0.80428	0.76658		1.1024	0.90835	0.82171	0.80354	0.79352		0.57419	0.49286	0.47547	0.47978	0.4886
2.4391	1.3193	1.008	0.94026	0.88768		1.2693	1.0579	0.96521	0.94062	0.91999		1.0644	0.79268	0.66135	0.63935	0.6291
2.3517	1.2646	1.0001	0.95555	0.92804		1.4297	1.071	0.97208	0.962	0.96222		1.624	1.1966	1.0643	1.0519	1.053
2.5853	1.305	0.95715	0.89108	0.84731		1.1703	0.97709	0.89826	0.88417	0.8778		1.0593	0.93868	0.90481	0.90581	0.9113
1.946	1.1824	0.94386	0.88959	0.84731		1.0378	0.94344	0.90055	0.88839	0.8778		0.83559	0.78489	0.76527	0.76518	0.77
2.1406	1.1441	0.83917	0.76633	0.70604		0.99664	0.87123	0.79072	0.76083	0.73041		0.58571	0.45276	0.37471	0.3582	0.34851
1.7356	1.0816	0.85425	0.80362	0.76658		0.97933	0.87691	0.81855	0.80372	0.79352		0.88133	0.8258	0.78748	0.77699	0.77
2.3513	1.3373	1.08	1.0361	1.0088		1.4487	1.1367	1.0514	1.0443	1.0468		1.5711	1.3247	1.2194	1.2023	1.1951
2.2488	1.2811	1.0376	0.99525	0.96841		1.2985	1.0707	1.0054	1.0008	1.0045		1.499	1.2106	1.0826	1.0619	1.053
2.5478	1.2429	0.90516	0.83709	0.78676		1.1599	0.9575	0.85921	0.83422	0.81458		1.1427	0.88766	0.73943	0.71326	0.6995
3.0365	1.5687	1.1429	1.0613	1.0088		1.4442	1.1831	1.0732	1.0541	1.0468		1.5971	1.277	1.1356	1.1206	1.124
2.4331	1.577	1.2996	1.2377	1.1905		1.6408	1.3759	1.2748	1.2529	1.2376		2.4217	2.2315	2.2219	2.2427	2.2741
2.2229	1.3928	1.1119	1.0437	0.9886		1.3654	1.1712	1.0767	1.0493	1.0256		0.78899	0.74162	0.7136	0.70539	0.6995
1.818	1.1967	0.97734	0.91908	0.86749		1.234	1.0479	0.95586	0.92677	0.89889		0.43498	0.39183	0.36471	0.35612	0.34851
2.726	1.4187	1.0248	0.93607	0.86749		1.2774	1.0764	0.96357	0.92915	0.89889		0.6961	0.57211	0.51029	0.49693	0.4886
2.4256	1.473	1.1291	1.0483	0.9886		1.476	1.204	1.0792	1.0476	1.0256		1.2644	0.98455	0.90336	0.89905	0.9113
1.7661	1.2604	1.0205	0.9572	0.90786		1.2974	1.1093	0.99634	0.96456	0.9411		1.1615	1.0713	1.0149	0.99703	0.9821
2.1601	1.4461	1.1869	1.1225	1.0693		1.4006	1.2283	1.1503	1.129	1.1103		0.90227	0.84859	0.80551	0.78777	0.77
2.1792	1.2808	0.98708	0.91964	0.86749		1.2133	1.0384	0.9469	0.92074	0.89889		1.3238	1.1336	0.99657	0.9511	0.9113
1.8914	1.3809	1.2199	1.182	1.1501		1.4776	1.2822	1.2179	1.2046	1.1951		1.7313	1.527	1.5216	1.5357	1.5522
2.8933	1.6505	1.2865	1.2157	1.1703		1.5962	1.3326	1.2328	1.2181	1.2163		1.45	1.2421	1.1752	1.1765	1.1951
2.8692	1.6143	1.2137	1.1214	1.0492		1.4787	1.2704	1.1546	1.1197	1.0891		0.93045	0.85932	0.80314	0.78521	0.77
2.1706	1.3824	1.1256	1.0698	1.029		1.3528	1.1658	1.0901	1.0755	1.0679		1.2523	1.1605	1.1247	1.1213	1.124
2.4492	1.282	0.88507	0.80162	0.7464		1.3515	1.0131	0.83798	0.79716	0.77248		1.7462	1.4796	1.3085	1.2496	1.1951
2.3387	1.5197	1.2951	1.2555	1.2309		1.3896	1.2674	1.2541	1.2638	1.2801		1.3917	1.4604	1.6086	1.6574	1.6957
2.2208	1.4744	1.1757	1.1035	1.0492		1.5035	1.271	1.1444	1.1118	1.0891		1.5935	1.3936	1.2727	1.2319	1.1951
2.0648	1.3643	1.1039	1.04	0.9886		1.4234	1.1899	1.0787	1.0493	1.0256		0.94459	0.8205	0.74669	0.72198	0.6995
2.5951	1.4426	1.0866	1.0081	0.94823		1.4289	1.1684	1.0429	1.0099	0.98335		1.7444	1.3854	1.169	1.1055	1.053
2.2661	1.4407	1.124	1.047	0.9886		1.3617	1.1874	1.0803	1.0492	1.0256		1.4666	1.36	1.296	1.2781	1.2663
2.553	1.4382	1.0571	0.97109	0.90786		1.4436	1.1583	1.0092	0.97004	0.9411		1.6275	1.2749	1.0769	1.023	0.9821
2.1176	1.3427	1.0849	1.0286	0.9886		1.3242	1.1363	1.0522	1.0347	1.0256		1.3309	1.2179	1.1934	1.1927	1.1951
2.3084	1.5117	1.2268	1.1606	1.1097		1.5406	1.3084	1.1992	1.1722	1.1527		2.1608	1.8019	1.5949	1.5325	1.4806
2.4844	1.5328	1.2085	1.1386	1.0895		1.4822	1.2686	1.1668	1.1444	1.1315		1.7614	1.6323	1.5427	1.5105	1.4806
1.6809	1.0286	0.77149	0.71035	0.66568		1.1359	0.87683	0.74556	0.71194	0.68838		1.6823	1.2447	1.063	1.0167	0.9821
1.3667	0.87678	0.70015	0.65784	0.62532		1.007	0.7843	0.68738	0.66352	0.64638		0.63771	0.54644	0.5397	0.54675	0.5588
2.364	1.4783	1.1444	1.0663	1.0088		1.4243	1.2158	1.0984	1.0679	1.0468		1.5636	1.4177	1.3234	1.2929	1.2663
2.5962	1.5633	1.2463	1.1788	1.1299		1.7082	1.3566	1.2196	1.1913	1.1739		1.8329	1.6267	1.5262	1.5006	1.4806
3.0068	1.362	0.99632	0.93985	0.90786		1.5361	1.1234	0.9706	0.94836	0.9411		1.7446	1.3755	1.1319	1.0803	1.053
2.5479	1.3835	1.0203	0.93541	0.86749		1.4554	1.1406	0.9834	0.93809	0.89889		1.2502	0.97735	0.83558	0.79861	0.77
2.8773	1.7212	1.3965	1.3417	1.3116		1.6897	1.4261	1.3522	1.3519	1.3652		2.2689	2.11	2.1267	2.1593	2.2014
2.5633	1.6205	1.2812	1.1975	1.1299		1.6405	1.3808	1.2456	1.2067	1.1739		1.8786	1.5258	1.3182	1.2526	1.1951
2.1968	1.306	1.0494	1.0007	0.96841		1.4122	1.1179	1.022	1.0085	1.0045		1.6332	1.3452	1.2327	1.2098	1.1951
2.2237	1.4541	1.2122	1.1558	1.1097		1.6496	1.3324	1.208	1.1773	1.1527		2.2075	1.4433	1.2384	1.2088	1.1951
2.6254	1.5587	1.2168	1.1428	1.0895		1.5515	1.294	1.1765	1.1492	1.1315		1.626	1.4981	1.4742	1.475	1.4806
3.2994	1.7893	1.3773	1.2932	1.2309		1.575	1.3765	1.306	1.2912	1.2801		1.878	1.4855	1.2639	1.22	1.1951
3.7275	1.8122	1.2965	1.2052	1.1501		1.6953	1.368	1.223	1.2005	1.1951		2.3719	2.047	1.7969	1.7341	1.6957
2.7263	1.7428	1.3529	1.2522	1.1703		1.7132	1.4679	1.3119	1.2612	1.2163		1.8303	1.5659	1.3862	1.3234	1.2663
2.5225	1.7202	1.4078	1.3307	1.2712		1.6518	1.4689	1.3705	1.343	1.3226		1.9248	1.7938	1.6916	1.6551	1.6239
2.7453	1.7211	1.3574	1.2664	1.1905		1.6885	1.4439	1.3144	1.2745	1.2376		1.1265	0.94454	0.83555	0.80087	0.77
2.1057	1.5644	1.3201	1.2358	1.1501		1.6015	1.4496	1.3185	1.2597	1.1951		0.33115	0.33701	0.34449	0.34678	0.34851
2.4442	1.5168	1.2304	1.1637	1.1097		1.4888	1.2871	1.1976	1.1732	1.1527		1.4002	1.1435	1.0665	1.0563	1.053
2.4711	1.6203	1.2873	1.216	1.1703		2.1915	1.5651	1.2971	1.2437	1.2163		4.7372	2.8883	2.1	1.9343	1.8397
2.2397	1.5932	1.3609	1.3016	1.2511		1.7414	1.4744	1.3561	1.3257	1.3013		1.2541	1.0875	1.0497	1.0493	1.053
2.846	1.6194	1.304	1.2478	1.2107		1.578	1.3392	1.2665	1.2589	1.2588		1.2188	1.2023	1.198	1.1968	1.1951
1.4727	0.85712	0.70955	0.68347	0.66568		0.89953	0.72957	0.6896	0.68691	0.68838		0.79025	0.57703	0.53914	0.54534	0.5588
3.4232	2.2545	1.8748	1.8006	1.756		2.2001	1.9293	1.8341	1.8263	1.8359		1.9508	2.0544	2.1425	2.1733	2.2014
1.9175	1.214	0.9368	0.87339	0.82713		0.95057	0.8893	0.85842	0.85231	0.84937		0.44815	0.35937	0.31985	0.3134	0.31053
2.3332	1.3374	0.99435	0.92803	0.88768		1.0624	0.9548	0.90718	0.90482	0.91248		0.69976	0.63257	0.62074	0.62199	0.62434
2.341	1.3643	0.99639	0.91086	0.84731		1.0167	0.92971	0.88261	0.8737	0.87039		5.8435	1.5221	0.82057	0.70306	0.62434
1.9963	1.2113	0.90875	0.8392	0.78676		0.96746	0.88647	0.83454	0.81956	0.80737		0.29164	0.29829	0.30349	0.30677	0.31053
2.3074	1.3637	1.0126	0.93035	0.86749		1.0452	0.95016	0.90805	0.89877	0.89143		0.90644	0.71033	0.63732	0.62801	0.62434
2.2662	1.3671	1.0203	0.94279	0.88768		0.98894	0.93668	0.91407	0.91161	0.91248		0.43916	0.34727	0.31663	0.3125	0.31053
2.3136	1.3773	1.0397	0.96375	0.90786		1.0076	0.95125	0.93224	0.93119	0.93354		1.4638	1.2722	1.2465	1.2525	1.262
2.2752	1.4255	1.1234	1.0492	0.9886		1.0567	1.0224	1.0215	1.021	1.018		1.6536	1.615	1.6115	1.6006	1.586
1.9179	1.2373	0.99314	0.94181	0.90786		1.0277	0.94607	0.92052	0.92323	0.93354		3.0271	2.7436	2.5987	2.5803	2.5792
2.0749	1.3011	1.0117	0.94206	0.88768		0.99399	0.94366	0.92104	0.916	0.91248		0	0	0	0	0
2.6604	1.4539	1.0159	0.91026	0.82713		1.1541	0.99651	0.90216	0.87386	0.84937		0.39107	0.57504	0.62309	0.62561	0.62434
2.5937	1.4909	1.1138	1.0228	0.94823		1.1732	1.0619	1.0088	0.99236	0.97572		0	0	0	0	0
2.6468	1.6178	1.2032	1.0959	1.0088		1.214	1.1384	1.0855	1.0633	1.0391		0.97944	0.95317	0.94615	0.94393	0.94149
2.3013	1.4129	1.109	1.0484	1.0088		1.1885	1.0732	1.0339	1.033	1.0391		1.3225	1.2792	1.2605	1.2598	1.262
2.4469	1.528	1.1717	1.0816	1.0088		1.1702	1.1104	1.0689	1.0539	1.0391		0.64906	0.61617	0.61688	0.62031	0.62434
2.4472	1.4404	1.0613	0.97321	0.90786		1.1038	1.0096	0.9553	0.942	0.93354		2.9615	1.898	1.4238	1.327	1.262
2.6921	1.5976	1.1981	1.1106	1.0492		1.1776	1.098	1.0732	1.0745	1.0814		2.7467	2.6294	2.5821	2.5783	2.5792
2.2326	1.3647	1.0548	0.98319	0.92804		1.098	1.0149	0.97407	0.96334	0.95463		1.0871	0.96537	0.93438	0.93595	0.94149
2.5805	1.5148	1.1503	1.069	1.0088		1.1285	1.0526	1.0331	1.0345	1.0391		0.52008	0.59884	0.6201	0.62292	0.62434
2.8096	1.6644	1.2455	1.154	1.0895		1.2584	1.153	1.1172	1.1171	1.1238		1.0598	0.9785	0.94528	0.94186	0.94149
3.3266	1.7918	1.2637	1.1423	1.0492		1.3712	1.2141	1.1249	1.1009	1.0814		0.55491	0.58736	0.61006	0.61748	0.62434
2.8649	1.6003	1.1425	1.0406	0.96841		1.2447	1.1025	1.0235	1.0062	0.99683		0.28265	0.29726	0.30492	0.30774	0.31053
2.4071	1.3771	0.97824	0.88216	0.80694		0.97765	0.91384	0.86455	0.84642	0.82836		0	0	0	0	0
2.4818	1.5693	1.1893	1.0899	1.0088		1.153	1.1081	1.0709	1.0554	1.0391		0.28684	0.30754	0.31076	0.31086	0.31053
2.2159	1.4918	1.1821	1.0986	1.029		1.1356	1.1097	1.0868	1.0748	1.0603		0	0	0	0	0
2.3464	1.472	1.1135	1.0216	0.94823		1.1016	1.0569	1.0113	0.99316	0.97572		0.75238	0.58727	0.40262	0.35092	0.31053
2.3137	1.5111	1.2032	1.1359	1.0895		1.1817	1.1338	1.1175	1.1183	1.1238		1.6061	1.595	1.593	1.5901	1.586
2.629	1.6079	1.2027	1.0966	1.0088		1.1597	1.1135	1.0772	1.0596	1.0391		0	0	0	0	0
2.2542	1.477	1.1968	1.1346	1.0895		1.2112	1.1429	1.1211	1.1203	1.1238		2.0715	1.9937	1.9388	1.9239	1.9135
2.6451	1.5519	1.1304	1.0273	0.94823		1.1267	1.0579	1.0081	0.99086	0.97572		0.54451	0.60012	0.61783	0.62161	0.62434
2.5703	1.4854	1.122	1.0519	1.0088		1.1121	1.0223	1.0051	1.0168	1.0391		1.5934	1.5639	1.5691	1.577	1.586
2.681	1.6819	1.2895	1.1901	1.1097		1.2805	1.2126	1.1742	1.16	1.145		1.4115	1.0708	0.98083	0.95983	0.94149
3.0247	1.7467	1.2711	1.1567	1.0693		1.3145	1.2103	1.1424	1.1207	1.1026		0.73624	0.61267	0.61191	0.61774	0.62434
2.1729	1.236	0.86257	0.76518	0.68586		1.039	0.88861	0.77965	0.74022	0.70263		0.29366	0.30893	0.31119	0.31106	0.31053
1.8836	1.1212	0.83456	0.76351	0.70604		0.94957	0.83502	0.7655	0.74362	0.72355		1.1281	0.49153	0.36439	0.33491	0.31053
1.7933	1.0912	0.82	0.75529	0.70604		0.91406	0.80752	0.74874	0.73377	0.72355		1.2642	1.2963	1.2953	1.2817	1.262
1.7161	1.1387	0.91041	0.85292	0.80694		0.98811	0.90539	0.85534	0.84042	0.82836		2.0911	1.7722	1.6185	1.5942	1.586
2.2181	1.3496	1.0039	0.91647	0.84731		1.0254	0.95544	0.90748	0.889	0.87039		0.54281	0.60814	0.62147	0.62346	0.62434
2.1658	1.329	1.0075	0.92915	0.86749		1.1397	1.0039	0.92897	0.9083	0.89143		0.29517	0.30551	0.30861	0.30959	0.31053
1.8308	1.1795	0.9039	0.82914	0.76658		1.0771	0.93974	0.84686	0.81526	0.78639		0.81752	0.68511	0.63288	0.62614	0.62434
2.0747	1.2616	0.96525	0.90527	0.86749		0.99845	0.90214	0.87547	0.87936	0.89143		2.1483	1.7201	1.6047	1.5912	1.586
2.306	1.3869	1.03	0.94733	0.88768		1.0471	0.96731	0.92471	0.91592	0.91248		0.88248	0.9294	0.94043	0.94158	0.94149
2.0327	1.2659	1.0267	0.97957	0.94823		0.99394	0.93814	0.94475	0.95788	0.97572		1.0842	0.98432	0.94534	0.94164	0.94149
2.4951	1.5221	1.1233	1.0251	0.94823		1.2317	1.1092	1.0262	0.99919	0.97572		0.99537	0.94451	0.93071	0.93439	0.94149
1.9471	1.3777	1.1417	1.0871	1.0492		1.3444	1.1969	1.1122	1.0922	1.0814		2.7601	2.6347	2.6071	2.5966	2.5792
2.6172	1.5793	1.1728	1.0702	0.9886		1.3762	1.1894	1.0817	1.0478	1.018		1.4206	1.2999	1.2711	1.2661	1.262
2.6045	1.5511	1.124	1.0152	0.92804		1.3817	1.1838	1.0448	0.99766	0.95463		0.3733	0.31608	0.30732	0.30836	0.31053
2.4551	1.6233	1.307	1.2304	1.1703		1.2901	1.2399	1.2184	1.2129	1.2088		1.5973	1.5579	1.563	1.5733	1.586
2.7436	1.716	1.3251	1.2283	1.1501		1.2757	1.2327	1.211	1.2006	1.1875		1.284	1.0633	0.95915	0.94518	0.94149
3.8528	2.0802	1.4669	1.3306	1.2309		1.5851	1.3975	1.306	1.2858	1.2726		0.83757	0.66086	0.61951	0.62005	0.62434
2.6993	1.6907	1.3193	1.2339	1.1703		1.3466	1.2508	1.2137	1.209	1.2088		1.0276	0.95892	0.93711	0.93778	0.94149
2.96	1.7483	1.356	1.2796	1.2309		1.3423	1.2437	1.2312	1.2463	1.2726		2.4267	2.238	2.2268	2.2347	2.2446
2.7953	1.683	1.2434	1.1346	1.0492		1.4522	1.257	1.1433	1.1097	1.0814		1.1958	1.0045	0.94784	0.94245	0.94149
2.4025	1.5457	1.2134	1.1323	1.0693		1.406	1.2418	1.1484	1.1226	1.1026		0.92819	0.91977	0.9255	0.93241	0.94149
2.6316	1.6793	1.2956	1.2022	1.1299		1.4992	1.3242	1.219	1.1893	1.1663		0.7994	0.68837	0.63514	0.627	0.62434
1.6844	1.0511	0.81822	0.76499	0.72622		0.81693	0.76226	0.74211	0.74137	0.74448		0	0	0	0	0
1.4146	0.90114	0.69604	0.64523	0.60514		0.71413	0.66012	0.63261	0.62535	0.6191		0.70298	0.6506	0.6266	0.62401	0.62434
2.8107	1.7869	1.3989	1.3045	1.2309		1.4739	1.3672	1.3072	1.2885	1.2726		2.5555	2.3299	2.2415	2.2371	2.2446
3.3799	2.0124	1.4879	1.3638	1.2712		1.5438	1.4086	1.343	1.3266	1.3153		2.2397	2.1889	2.2263	2.2387	2.2446
2.8621	1.9987	1.6636	1.5874	1.5338		1.6594	1.5959	1.5808	1.5844	1.594		6.7004	6.5783	6.507	6.5039	6.5174
1.6713	1.1691	0.97042	0.93039	0.90786		1.3318	1.1449	1.0366	1.0062	0.98307		1.7475	1.5586	1.4598	1.4398	1.4308
1.7725	1.181	0.96965	0.92926	0.90786		1.3785	1.1523	1.0344	1.0042	0.98307		1.8524	1.4945	1.3449	1.3236	1.3201
1.7524	1.1627	0.96413	0.93536	0.92804		1.2434	1.0787	1.0101	1.0023	1.005		1.1848	1.0266	0.98677	0.9853	0.98862
1.5325	1.1334	0.97207	0.94204	0.92804		1.1955	1.0981	1.0368	1.0187	1.005		1.5107	1.2836	1.155	1.1213	1.099
1.6538	1.1398	0.97456	0.95206	0.94823		1.1592	1.0497	1.0169	1.0182	1.027		1.8665	1.5549	1.4343	1.4249	1.4308
1.5697	1.1292	1.0112	1.0021	1.0088		1.232	1.1079	1.0826	1.0854	1.0928		1.377	1.1661	1.1065	1.1001	1.099
1.4084	1.0389	0.9001	0.87686	0.86749		1.2122	1.0511	0.9733	0.9537	0.9392		1.4527	1.2313	1.0728	1.0225	0.98862
1.7625	1.1819	0.94169	0.88661	0.84731		1.2278	1.0779	0.98063	0.94774	0.91727		0.9505	0.78592	0.68825	0.66786	0.6581
1.8269	1.1448	0.91307	0.87071	0.84731		1.2544	1.0572	0.95841	0.93441	0.91727		0.89816	0.80802	0.78719	0.77869	0.76817
1.7022	1.1772	1.0147	1.0022	1.0088		1.3292	1.1507	1.0891	1.0867	1.0928		1.2721	1.1787	1.13	1.1143	1.099
2.2009	1.3466	1.0442	0.98421	0.94823		1.5097	1.2286	1.0885	1.053	1.027		1.3908	1.0923	0.87466	0.81346	0.76817
1.9016	1.2303	0.98	0.93356	0.90786		1.3497	1.1478	1.0314	1.0024	0.98307		0.97356	0.82423	0.76721	0.76355	0.76817
1.4869	1.1082	0.99582	0.99149	1.0088		1.2838	1.1248	1.0758	1.0779	1.0928		1.6487	1.3062	1.1551	1.1211	1.099
1.6896	1.0632	0.89563	0.8734	0.86749		1.3078	1.0445	0.96025	0.9463	0.9392		2.9822	1.4797	0.91826	0.8231	0.76817
1.6206	1.0761	0.87344	0.82465	0.78676		1.1386	0.99601	0.91329	0.88268	0.85149		1.3833	1.2306	1.1445	1.12	1.099
1.4737	1.04	0.90919	0.89137	0.88768		1.1055	0.98378	0.95359	0.95451	0.96113		1.1705	1.1457	1.1866	1.1994	1.2095
1.3658	0.96279	0.83886	0.82553	0.82713		1.069	0.93134	0.89064	0.88975	0.89534		0.72345	0.69295	0.67549	0.66742	0.6581
1.3885	0.96234	0.82315	0.79851	0.78676		1.0166	0.90061	0.86304	0.85594	0.85149		0.68034	0.65036	0.65624	0.65794	0.6581
1.4327	0.98181	0.84997	0.83856	0.84731		1.1124	0.95543	0.90678	0.9066	0.91727		1.8739	1.5306	1.4332	1.4258	1.4308
1.2593	0.96177	0.89243	0.88642	0.88768		1.0196	0.94616	0.94971	0.95572	0.96113		0.93146	0.93071	0.97446	0.9848	0.98862
1.6708	1.119	0.93737	0.90449	0.88768		1.1448	1.0297	0.98096	0.96942	0.96113		1.4557	0.83435	0.61287	0.5719	0.54815
1.6492	1.0857	0.87025	0.82161	0.78676		1.176	1.0144	0.91539	0.88219	0.85149		0.48485	0.36671	0.33805	0.33277	0.32856
1.533	1.0571	0.89226	0.8629	0.84731		1.1378	0.99153	0.93294	0.92244	0.91727		1.052	0.93393	0.89131	0.88362	0.87834
1.5898	1.1025	0.94104	0.91646	0.90786		1.1346	1.0163	0.9807	0.97916	0.98307		1.9678	1.4961	1.3356	1.3191	1.3201
1.4998	0.99977	0.83911	0.82281	0.82713		1.0629	0.92897	0.88265	0.88392	0.89534		1.0839	0.93929	0.88193	0.87612	0.87834
1.8207	1.1938	0.94915	0.89115	0.84731		1.2246	1.0839	0.9881	0.95262	0.91727		0.52357	0.36159	0.26299	0.23776	0.21893
1.5116	1.0736	0.88937	0.84247	0.80694		1.1155	1.0021	0.92939	0.90134	0.87341		1.409	0.94782	0.72978	0.68563	0.6581
1.5517	1.0569	0.88102	0.84688	0.82713		1.0444	0.9491	0.9112	0.90232	0.89534		1.0369	0.85479	0.7848	0.7735	0.76817
1.5189	1.0585	0.92549	0.91722	0.92804		1.1297	1.0068	0.98025	0.98825	1.005		1.1523	1.1766	1.2705	1.3017	1.3201
1.639	1.1183	0.95679	0.93418	0.92804		1.2026	1.0544	1.0081	1.0036	1.005		1.3118	1.1909	1.1184	1.1046	1.099
1.9413	1.275	1.044	1.0049	0.9886		1.435	1.1858	1.0921	1.0764	1.0709		1.9415	1.2321	0.94214	0.8968	0.87834
1.9929	1.24	1.0055	0.96669	0.94823		1.3765	1.1308	1.0465	1.0331	1.027		1.9768	1.1368	0.779	0.70587	0.6581
1.6397	1.0824	0.9153	0.89268	0.88768		1.2631	1.0537	0.97744	0.96549	0.96113		0.59474	0.53649	0.53804	0.54319	0.54815
1.45	1.0162	0.86905	0.84243	0.82713		1.1312	0.9833	0.92318	0.90823	0.89534		0.98414	0.9014	0.88803	0.88442	0.87834
1.6322	1.0915	0.91076	0.88109	0.86749		1.1415	1.0007	0.94839	0.94107	0.9392		1.1411	1.0426	1.0048	0.99568	0.98862
1.8099	1.1134	0.86812	0.82559	0.80694		1.2144	1.0058	0.90216	0.88192	0.87341		1.6386	1.1509	0.95606	0.91062	0.87834
1.1746	0.88281	0.77539	0.75587	0.7464		0.9429	0.86577	0.82715	0.8164	0.80767		0.66571	0.52237	0.45627	0.44409	0.4383
1.5245	1.0545	0.90507	0.88739	0.88768		1.0637	0.96763	0.9442	0.94913	0.96113		1.6642	1.4199	1.3363	1.3241	1.3201
1.4436	1.0481	0.92964	0.91972	0.92804		1.1793	1.0459	1.0018	0.99914	1.005		2.1944	1.8322	1.7323	1.7373	1.7637
1.5333	1.045	0.89778	0.87567	0.86749		1.1343	1.0009	0.95416	0.94512	0.9392		0.73132	0.61003	0.55324	0.54654	0.54815
1.5424	1.0719	0.90012	0.86628	0.84731		1.1496	1.0158	0.94787	0.93	0.91727		0.82662	0.7309	0.74352	0.75577	0.76817
1.566	1.0634	0.86768	0.82123	0.78676		1.1277	0.98508	0.9083	0.8801	0.85149		0.52197	0.44688	0.4331	0.43476	0.4383
1.3586	0.99709	0.87535	0.85507	0.84731		1.0815	0.97146	0.92926	0.92122	0.91727		1.1239	0.86805	0.77946	0.76878	0.76817
1.3431	1.0118	0.89606	0.87606	0.86749		1.0337	0.9765	0.9512	0.94433	0.9392		0.54529	0.63629	0.71255	0.74106	0.76817
1.51	1.0715	0.92925	0.91024	0.90786		1.0481	0.98196	0.97093	0.97492	0.98307		1.0918	0.91967	0.87286	0.87228	0.87834
1.4319	0.99205	0.81117	0.77207	0.7464		1.0308	0.92057	0.85082	0.82786	0.80767		1.2653	1.0628	0.9369	0.90344	0.87834
1.3717	1.007	0.8625	0.83751	0.82713		1.0784	0.96162	0.91003	0.90012	0.89534		1.2849	1.0319	0.85275	0.80324	0.76817
1.6812	1.1078	0.91373	0.8814	0.86749		1.2009	1.0254	0.95425	0.94267	0.9392		1.6544	1.3035	1.1377	1.1103	1.099
1.5151	1.0921	0.94519	0.91975	0.90786		1.1762	1.0457	0.99779	0.98856	0.98307		1.3735	1.0975	0.93822	0.90131	0.87834
1.3729	0.9956	0.86668	0.84892	0.84731		1.1498	0.99302	0.93048	0.92017	0.91727		0.99397	0.89823	0.81313	0.78712	0.76817
1.5079	1.0806	0.95061	0.93281	0.92804		1.1774	1.05	1.0134	1.0079	1.005		1.5583	1.3037	1.1742	1.1345	1.099
1.6075	1.1222	0.9583	0.92677	0.90786		1.2091	1.0707	1.0131	0.99723	0.98307		1.458	1.366	1.3388	1.3298	1.3201
1.4647	1.0296	0.90665	0.89823	0.90786		1.1005	0.99022	0.96361	0.96914	0.98307		1.543	1.2717	1.1428	1.1151	1.099
1.4405	1.0099	0.86533	0.84028	0.82713		1.1207	0.9769	0.91908	0.90583	0.89534		0.79896	0.70965	0.67318	0.66468	0.6581
1.1918	0.90825	0.81525	0.80566	0.80694		0.93043	0.8818	0.86977	0.87059	0.87341		1.3705	1.2558	1.1517	1.1209	1.099
1.478	0.95348	0.76756	0.73747	0.72622		1.0312	0.87296	0.80083	0.78871	0.78576		1.1445	0.9498	0.87593	0.8713	0.87834
1.397	0.95707	0.82059	0.80568	0.80694		0.98273	0.88246	0.85894	0.86316	0.87341		1.1376	1.0234	0.98379	0.98301	0.98862
1.2815	0.93816	0.8175	0.79657	0.78676		1.012	0.90674	0.86587	0.85719	0.85149		1.1103	0.90197	0.79571	0.77641	0.76817
1.6989	1.1183	0.95038	0.93034	0.92804		1.1884	1.0333	0.99698	0.99832	1.005		1.3878	1.2495	1.2338	1.2242	1.2095
1.8388	1.1673	0.93724	0.90153	0.88768		1.3042	1.0732	0.97923	0.96522	0.96113		0.85363	0.67537	0.57865	0.55912	0.54815
1.8867	1.1635	0.96756	0.94661	0.94823		1.2303	1.0625	1.0146	1.0158	1.027		2.2376	1.576	1.4859	1.5065	1.5417
1.7235	1.1989	1.0039	0.95961	0.92804		1.2926	1.1403	1.0594	1.0319	1.005		0.92272	0.81333	0.77826	0.77238	0.76817
1.7051	1.2134	1.0316	0.99338	0.96841		1.2927	1.1543	1.0868	1.0668	1.0489		1.5939	1.3732	1.2464	1.2219	1.2095
1.6715	1.1964	1.005	0.96053	0.92804		1.2931	1.149	1.0644	1.0347	1.005		1.6308	1.3797	1.2024	1.1463	1.099
1.5973	1.2041	1.0519	1.0229	1.0088		1.3297	1.1957	1.1271	1.108	1.0928		2.1816	1.8228	1.6193	1.5716	1.5417
1.976	1.2859	1.0774	1.0443	1.029		1.3662	1.1892	1.1318	1.1217	1.1148		1.6772	1.3535	1.242	1.222	1.2095
1.5955	1.1595	1.0149	0.98681	0.96841		1.2132	1.1115	1.0785	1.0655	1.0489		0.98292	0.90493	0.88171	0.87919	0.87834
1.5641	1.1235	0.97054	0.9425	0.92804		1.2183	1.0866	1.032	1.0174	1.005		1.1699	1.0152	0.92821	0.90168	0.87834
1.8543	1.2567	1.0387	0.9873	0.94823		1.2954	1.157	1.0834	1.0557	1.027		0.70432	0.60868	0.56775	0.55713	0.54815
1.5037	1.0702	0.92166	0.8897	0.86749		1.2263	1.0623	0.98749	0.96309	0.9392		1.4518	1.1419	1.0257	1.0031	0.98862
1.5212	1.1242	0.99548	0.9681	0.94823		1.1898	1.0957	1.0611	1.0463	1.027		1.7526	1.4612	1.418	1.4218	1.4308
1.8644	1.2475	1.0601	1.0273	1.0088		1.2962	1.1488	1.1056	1.0982	1.0928		1.1142	0.82557	0.77486	0.76988	0.76817
1.7408	1.1735	0.95611	0.91244	0.88768		1.296	1.1155	1.0127	0.98355	0.96113		1.4752	1.1981	1.1168	1.1053	1.099
1.684	1.1426	0.93943	0.88877	0.84731		1.1559	1.0532	0.98368	0.95214	0.91727		1.1328	0.87261	0.71284	0.67898	0.6581
1.5092	1.1478	1.0085	0.98189	0.96841		1.2772	1.1548	1.0871	1.066	1.0489		1.9431	1.8857	1.8333	1.8007	1.7637
1.631	1.1247	0.96697	0.94067	0.92804		1.1688	1.0542	1.0177	1.0104	1.005		1.9677	1.6378	1.507	1.4681	1.4308
1.6485	1.1433	0.97725	0.95379	0.94823		1.2354	1.0903	1.0358	1.0282	1.027		1.0622	0.96192	0.90461	0.8895	0.87834
1.6477	1.1052	0.89646	0.84611	0.80694		1.1893	1.0298	0.93941	0.90662	0.87341		0.58421	0.56755	0.55467	0.55113	0.54815
1.7904	1.1685	0.93527	0.89039	0.86749		1.3072	1.0955	0.98367	0.95644	0.9392		1.1324	0.93991	0.88367	0.87806	0.87834
1.773	1.1847	0.96971	0.92943	0.90786		1.2471	1.0853	1.0107	0.99366	0.98307		1.2122	0.98246	0.88312	0.87407	0.87834
1.8585	1.1843	0.97057	0.93115	0.90786		1.2244	1.0672	1.0091	0.99487	0.98307		1.2348	1.1377	1.1665	1.1876	1.2095
1.6745	1.1359	0.91654	0.86409	0.82713		1.2805	1.0881	0.96822	0.92929	0.89534		1.6178	1.2395	1.116	1.1015	1.099
1.7077	1.1664	0.985	0.94963	0.92804		1.1605	1.0632	1.0265	1.0155	1.005		1.8888	1.368	1.1658	1.1248	1.099
1.7894	1.1517	0.89339	0.83941	0.80694		1.381	1.1134	0.95262	0.90755	0.87341		1.5392	1.3047	1.1659	1.1276	1.099
1.4836	1.0805	0.9187	0.8858	0.86749		1.1995	1.0593	0.98084	0.95772	0.9392		1.116	0.96022	0.83691	0.79785	0.76817
1.2759	0.93543	0.81673	0.79574	0.78676		1.0227	0.91207	0.86788	0.85784	0.85149		1.0432	0.91949	0.83592	0.80233	0.76817
1.3591	1.0063	0.88761	0.86381	0.84731		0.96539	0.93873	0.93275	0.9269	0.91727		0.97615	0.79217	0.69655	0.67402	0.6581
1.7138	1.0973	0.89189	0.85247	0.82713		1.1993	1.0039	0.9276	0.90987	0.89534		0.92051	0.66752	0.57111	0.55602	0.54815
1.81	1.1714	0.91193	0.84328	0.78676		1.3682	1.1197	0.96368	0.90699	0.85149		0.42643	0.46327	0.45691	0.44847	0.4383
1.8671	1.2154	0.99892	0.96389	0.94823		1.3191	1.1314	1.0507	1.0355	1.027		1.3213	1.1226	1.0317	1.008	0.98862
1.2004	0.88383	0.80173	0.79744	0.80694		0.954	0.86223	0.85213	0.85976	0.87341		1.6808	1.2728	1.1407	1.1159	1.099
1.66	1.0408	0.83903	0.80433	0.78676		1.1296	0.94867	0.87444	0.85969	0.85149		1.5975	1.0782	0.8435	0.79686	0.76817
1.2733	0.90674	0.78775	0.7705	0.76658		0.98938	0.87768	0.83512	0.82945	0.82958		0.83623	0.8972	0.89609	0.88821	0.87834
1.3611	0.8425	0.66833	0.63898	0.62532		0.91186	0.75764	0.69122	0.68001	0.6763		1.2844	0.99981	0.90473	0.88848	0.87834
1.1662	0.82588	0.7293	0.72119	0.72622		0.88241	0.78994	0.77221	0.77642	0.78576		1.3541	1.146	1.1008	1.0982	1.099
1.3098	0.89558	0.75581	0.72649	0.70604		0.9962	0.85482	0.7974	0.78038	0.76386		1.1386	0.87533	0.79042	0.77608	0.76817
1.6185	0.98535	0.78405	0.74703	0.72622		1.2153	0.93616	0.8263	0.80224	0.78576		1.6215	1.1453	0.88199	0.81637	0.76817
1.4782	0.93858	0.75357	0.71345	0.68586		1.2419	0.94029	0.80758	0.77184	0.74196		3.0556	1.5996	1.0628	0.95482	0.87834
1.4538	0.95633	0.78917	0.76035	0.7464		1.1478	0.92806	0.83748	0.81887	0.80767		1.6822	1.0539	0.83215	0.79258	0.76817
1.7214	1.085	0.89167	0.86882	0.86749		1.2777	1.0055	0.92955	0.92833	0.9392		1.4204	1.1915	1.051	1.0151	0.98862
1.154	0.79973	0.70358	0.69751	0.70604		0.90007	0.77565	0.74825	0.75241	0.76386		0.60164	0.57438	0.56144	0.55494	0.54815
1.3031	0.90032	0.79227	0.783	0.78676		1.0059	0.86718	0.84103	0.84436	0.85149		2.2541	1.7273	1.4527	1.3795	1.3201
1.4109	0.94624	0.81767	0.80471	0.80694		1.0943	0.90626	0.86341	0.86504	0.87341		1.2487	1.0176	0.91623	0.89391	0.87834
1.3766	0.88029	0.73602	0.71448	0.70604		0.93149	0.80456	0.76708	0.76333	0.76386		1.7287	1.045	0.83804	0.79775	0.76817
1.5305	0.98433	0.79965	0.76515	0.7464		1.2377	0.96171	0.85114	0.82577	0.80767		1.6154	1.0902	0.78659	0.71146	0.6581
1.371	0.92722	0.77136	0.75001	0.7464		1.0231	0.86929	0.80942	0.80374	0.80767		1.1535	1.0486	1.0004	0.99226	0.98862
1.4757	0.94613	0.79693	0.77496	0.76658		1.0848	0.88696	0.83459	0.82953	0.82958		1.1184	0.94757	0.89549	0.88539	0.87834
1.3468	1.0058	0.92088	0.91786	0.92804		1.1525	1.0178	0.99332	0.99675	1.005		1.5203	1.3885	1.4068	1.4202	1.4308
1.576	1.0437	0.91037	0.90049	0.90786		1.1989	0.9938	0.95967	0.96742	0.98307		0.95718	0.94809	0.99141	0.99464	0.98862
1.3256	0.94088	0.82654	0.81122	0.80694		1.1019	0.92744	0.88097	0.87569	0.87341		0.80294	0.77234	0.77109	0.77058	0.76817
1.412	0.95177	0.8185	0.80396	0.80694		1.09	0.91412	0.86551	0.86479	0.87341		1.2109	0.99259	0.90916	0.89121	0.87834
1.637	1.0576	0.88695	0.85931	0.84731		1.1657	0.98527	0.92646	0.9186	0.91727		8.5907	2.517	1.4613	1.3052	1.2095
1.4924	1.0523	0.8605	0.80855	0.76658		1.1565	1.0156	0.90984	0.86923	0.82958		1.7716	1.1879	0.88783	0.81848	0.76817
1.234	0.89238	0.75294	0.71605	0.68586		0.95569	0.86542	0.80096	0.77271	0.74196		0.51741	0.4638	0.44142	0.43863	0.4383
1.7154	1.1118	0.94054	0.90868	0.88768		1.4495	1.124	1.0134	0.98588	0.96113		2.9736	1.6984	1.17	1.0637	0.98862
1.5511	1.0358	0.88051	0.85691	0.84731		1.1306	0.97729	0.92881	0.92127	0.91727		1.0535	0.8057	0.7752	0.77221	0.76817
1.9205	1.2252	1.0215	1.0026	1.0088		1.3303	1.1024	1.0563	1.0683	1.0928		1.5745	1.3266	1.181	1.1366	1.099
1.3823	1.0086	0.86093	0.82832	0.80694		1.1657	1.0206	0.93182	0.90158	0.87341		0.82191	0.69784	0.66049	0.65729	0.6581
1.6662	1.1407	0.95701	0.93266	0.92804		1.3373	1.126	1.0281	1.0115	1.005		1.393	1.201	1.048	1.0078	0.98862
2.2227	1.3369	1.0514	1.0152	1.0088		1.476	1.1923	1.0884	1.0825	1.0928		1.3492	1.1378	1.0108	0.99192	0.98862
1.6339	1.1348	0.99741	0.98457	0.9886		1.1787	1.0669	1.0503	1.0578	1.0709		1.1661	1.0937	1.0869	1.092	1.099
1.4055	1.003	0.83936	0.80592	0.78676		1.1686	1.0086	0.90807	0.87695	0.85149		1.544	1.2842	1.0979	1.037	0.98862
2.0096	1.2185	0.90632	0.82933	0.76658		1.379	1.1132	0.94288	0.88516	0.82958		0	0	0	0	0
1.3787	0.92958	0.77167	0.74242	0.72622		0.98442	0.87008	0.81428	0.79858	0.78576		1.0303	0.8971	0.86809	0.87112	0.87834
1.493	1.0186	0.82686	0.78048	0.7464		1.0888	0.95567	0.86631	0.83546	0.80767		0.89315	0.69799	0.64677	0.64855	0.6581
1.5619	1.1642	1.0002	0.95201	0.90786		1.2564	1.1435	1.0669	1.0286	0.98307		0.67017	0.60469	0.62885	0.64404	0.6581
1.4551	0.89987	0.73665	0.71311	0.70604		1.0332	0.83292	0.76953	0.76291	0.76386		3.5562	1.9323	1.3729	1.2719	1.2095
1.6199	1.1934	1.0014	0.94968	0.90786		1.3393	1.1864	1.0745	1.0294	0.98307		1.3532	1.1634	1.0401	1.0083	0.98862
1.7659	1.2796	1.1406	1.1189	1.1097		1.4481	1.2773	1.2258	1.2137	1.2027		1.4854	1.3328	1.2619	1.2363	1.2095
1.8435	1.2813	1.0932	1.062	1.0492		1.3812	1.2282	1.1603	1.1457	1.1368		1.4385	1.1754	1.0323	1.0032	0.98862
1.5827	1.1853	1.0331	1.0038	0.9886		1.3574	1.1947	1.112	1.089	1.0709		1.6403	1.3888	1.1997	1.1425	1.099
1.9449	1.3539	1.1454	1.1082	1.0895		1.4533	1.2846	1.211	1.1936	1.1807		1.6141	1.4904	1.4452	1.4367	1.4308
1.8336	1.3099	1.131	1.1012	1.0895		1.3948	1.2528	1.1986	1.1876	1.1807		1.5966	1.4196	1.3413	1.3269	1.3201
1.5911	1.1467	0.97939	0.94624	0.92804		1.3009	1.1395	1.0527	1.0267	1.005		1.7257	1.4588	1.3457	1.3266	1.3201
1.8112	1.2767	1.0988	1.0664	1.0492		1.3065	1.191	1.1516	1.1431	1.1368		1.0731	1.0624	1.0782	1.088	1.099
1.8622	1.2583	1.0326	0.99018	0.96841		1.278	1.1464	1.0774	1.0601	1.0489		1.5937	1.4077	1.325	1.3162	1.3201
1.8016	1.2382	1.0393	1.0045	0.9886		1.3639	1.1809	1.1	1.0822	1.0709		1.4568	1.2463	1.1406	1.116	1.099
1.6139	1.2257	1.0732	1.0439	1.029		1.2795	1.1874	1.1388	1.1252	1.1148		1.0854	1.0651	1.0122	0.9966	0.98862
2.0319	1.298	1.046	0.9975	0.96841		1.4756	1.2281	1.1051	1.0733	1.0489		0.88416	0.63714	0.55721	0.54831	0.54815
2.0412	1.394	1.1664	1.1121	1.0693		1.4576	1.2995	1.2227	1.1927	1.1588		1.5878	1.3656	1.3182	1.317	1.3201
2.2346	1.3944	1.1078	1.0561	1.029		1.5899	1.301	1.1647	1.1343	1.1148		2.0421	1.5792	1.3616	1.3289	1.3201
1.5827	1.1403	0.97287	0.9356	0.90786		1.1923	1.0876	1.0313	1.0086	0.98307		0.74158	0.70577	0.74105	0.7572	0.76817
1.8706	1.2983	1.0778	1.0335	1.0088		1.3869	1.2244	1.1338	1.11	1.0928		1.5016	1.3139	1.2306	1.2162	1.2095
1.863	1.2033	0.97126	0.92175	0.88768		1.3246	1.1301	1.0243	0.9913	0.96113		1.1857	0.89281	0.79715	0.77969	0.76817
1.6727	1.227	1.0668	1.0394	1.029		1.4247	1.2463	1.1567	1.1328	1.1148		1.7833	1.6325	1.6152	1.6297	1.6526
1.7389	1.2336	1.0251	0.97941	0.94823		1.2655	1.1534	1.0788	1.0521	1.027		0.92788	0.78881	0.70218	0.67771	0.6581
1.7802	1.2402	1.0435	0.99972	0.96841		1.4499	1.235	1.1231	1.0858	1.0489		1.4306	1.225	1.1434	1.1206	1.099
1.7791	1.2363	1.0833	1.0674	1.0693		1.4014	1.2028	1.1531	1.1524	1.1588		2.3603	1.9294	1.7249	1.6809	1.6526
1.7749	1.2656	1.078	1.0525	1.0492		1.4819	1.2512	1.1529	1.1387	1.1368		1.4836	1.2623	1.0849	1.0293	0.98862
1.5749	1.1728	1.0288	1.0096	1.0088		1.2518	1.1422	1.0968	1.0912	1.0928		1.9032	1.6712	1.4961	1.452	1.4308
2.1148	1.3523	1.0644	1.0135	0.9886		1.3851	1.1992	1.0986	1.0789	1.0709		1.5928	1.2289	1.1099	1.098	1.099
1.7701	1.1544	0.92279	0.87601	0.84731		1.3102	1.0868	0.96964	0.93967	0.91727		1.1871	0.96613	0.89404	0.88298	0.87834
1.5557	1.1348	0.98861	0.96959	0.96841		1.2019	1.0894	1.0502	1.0469	1.0489		1.3995	1.2402	1.1389	1.1136	1.099
1.7839	1.1768	0.9603	0.91549	0.88768		1.2489	1.0926	1.0058	0.98065	0.96113		0.95923	0.81944	0.83578	0.85538	0.87834
1.6898	1.017	0.80879	0.77026	0.7464		1.3104	0.97564	0.85424	0.82783	0.80767		0.42017	0.40077	0.42504	0.43298	0.4383
1.7915	1.231	1.0237	0.97924	0.94823		1.42	1.198	1.0915	1.0586	1.027		1.4976	1.2323	1.0679	1.0229	0.98862
2.0623	1.392	1.1807	1.1539	1.1501		1.3679	1.2619	1.2339	1.2369	1.2467		1.9687	1.6699	1.553	1.5398	1.5417
1.7674	1.1929	1.004	0.96851	0.94823		1.3889	1.1612	1.0686	1.0455	1.027		1.5452	1.455	1.3852	1.3534	1.3201
1.6279	1.0766	0.90948	0.88813	0.88768		1.23	1.0263	0.96045	0.95533	0.96113		0.65708	0.61789	0.63772	0.64824	0.6581
1.6238	1.1832	1.0121	0.97423	0.94823		1.3166	1.1608	1.0805	1.0536	1.027		1.0864	0.89073	0.79771	0.7787	0.76817
1.3963	0.98432	0.84516	0.83502	0.84731		1.0673	0.93226	0.89068	0.89721	0.91727		1.399	1.1981	1.0532	1.0138	0.98862
1.8224	1.1153	0.90063	0.8811	0.88768		1.223	1.0061	0.93685	0.94133	0.96113		1.4918	1.2942	1.2064	1.2013	1.2095
1.8923	1.2356	1.007	0.96696	0.94823		1.4912	1.2003	1.0702	1.0428	1.027		1.8274	1.4878	1.2841	1.2382	1.2095
1.8613	1.3051	1.1328	1.1183	1.1299		1.4084	1.246	1.202	1.2071	1.2247		1.5412	1.3924	1.2864	1.246	1.2095
1.7654	1.2544	1.0818	1.0564	1.0492		1.2961	1.1775	1.1395	1.136	1.1368		1.605	1.2682	1.0774	1.0271	0.98862
2.0427	1.272	1.0115	0.95954	0.92804		1.4429	1.1879	1.0639	1.0307	1.005		3.2282	1.8811	1.3126	1.1871	1.099
1.6894	1.1904	1.0009	0.97343	0.96841		1.4167	1.1885	1.0746	1.0546	1.0489		2.5582	2.2623	2.0187	1.9383	1.8748
1.573	1.0162	0.84398	0.82498	0.82713		1.1861	0.96454	0.8913	0.88737	0.89534		1.0043	0.94824	0.97325	0.9832	0.98862
1.9963	1.24	0.98302	0.93547	0.90786		1.273	1.0892	1.0108	0.99435	0.98307		0.61607	0.5646	0.54947	0.54805	0.54815
1.895	1.2374	0.99317	0.95699	0.94823		1.357	1.1441	1.0415	1.0269	1.027		1.1608	1.1006	1.0197	0.99757	0.98862
1.9671	1.2746	1.0328	0.9903	0.96841		1.3929	1.1747	1.0798	1.0606	1.0489		1.276	1.1	1.0124	0.99641	0.98862
2.1189	1.445	1.2501	1.229	1.2309		1.5879	1.3754	1.3224	1.3239	1.3347		2.3738	2.0296	1.8273	1.7857	1.7637
1.8103	1.245	1.0943	1.0824	1.0895		1.3852	1.2038	1.1654	1.1695	1.1807		1.5015	1.2451	1.1445	1.1195	1.099
2.0877	1.3748	1.1187	1.0651	1.029		1.4257	1.244	1.1604	1.1365	1.1148		1.0123	0.76805	0.6749	0.66217	0.6581
2.2039	1.3949	1.1109	1.0662	1.0492		1.4729	1.2521	1.1521	1.1378	1.1368		1.6575	1.3592	1.2615	1.235	1.2095
1.782	1.2494	1.0365	0.98623	0.94823		1.2484	1.1555	1.0878	1.0585	1.027		1.0366	0.94627	0.90481	0.89147	0.87834
1.8987	1.3419	1.1486	1.1188	1.1097		1.4241	1.2691	1.2118	1.2037	1.2027		1.6093	1.5124	1.4695	1.451	1.4308
2.0813	1.3744	1.0911	1.029	0.9886		1.4527	1.2619	1.1405	1.1025	1.0709		1.3898	1.151	1.0328	1.0065	0.98862
2.0174	1.3315	1.0813	1.0265	0.9886		1.4727	1.2614	1.1433	1.1054	1.0709		1.1302	0.98067	0.91343	0.89486	0.87834
1.8537	1.3196	1.1103	1.0629	1.029		1.3409	1.2422	1.1718	1.144	1.1148		0.7337	0.67996	0.66175	0.65902	0.6581
2.2141	1.4022	1.092	1.0207	0.96841		1.5051	1.2799	1.1416	1.0942	1.0489		0.93175	0.81284	0.78447	0.77682	0.76817
2.0589	1.3656	1.1342	1.0998	1.0895		1.4691	1.279	1.1976	1.1843	1.1807		1.6979	1.4156	1.3233	1.3154	1.3201
1.1138	0.76817	0.65381	0.6348	0.62532		0.75173	0.69656	0.6818	0.67884	0.6763		0.93454	0.86999	0.81592	0.79254	0.76817
2.0512	1.3129	1.0718	1.0452	1.0492		1.4536	1.2067	1.1189	1.1187	1.1368		2.425	1.9229	1.6275	1.5684	1.5417
1.7572	1.1741	0.94903	0.90044	0.86749		1.3376	1.132	1.0078	0.97063	0.9392		0.76487	0.617	0.56207	0.55283	0.54815
2.3396	1.4072	1.1099	1.0656	1.0492		1.5396	1.2452	1.1438	1.1338	1.1368		1.7711	1.3624	1.2219	1.2087	1.2095
1.8002	1.2655	1.1062	1.0883	1.0895		1.335	1.1988	1.168	1.171	1.1807		1.4747	1.2409	1.1337	1.112	1.099
2.3388	1.4854	1.1954	1.1414	1.1097		1.4965	1.3076	1.2308	1.2142	1.2027		1.8857	1.4556	1.2794	1.2402	1.2095
2.0425	1.4031	1.215	1.1922	1.1905		1.4473	1.3088	1.2755	1.2793	1.2907		1.1867	1.1564	1.171	1.1879	1.2095
1.9574	1.4336	1.2424	1.2001	1.1703		1.5082	1.3843	1.3207	1.296	1.2687		1.6862	1.5035	1.4476	1.4374	1.4308
1.865	1.3487	1.1394	1.0955	1.0693		1.5522	1.3384	1.2223	1.1875	1.1588		1.4982	1.2634	1.0877	1.0323	0.98862
1.8802	1.3318	1.1398	1.1132	1.1097		1.5571	1.323	1.2245	1.208	1.2027		2.0246	1.6839	1.4433	1.3716	1.3201
1.998	1.4232	1.2183	1.1765	1.1501		1.6255	1.4108	1.3041	1.2732	1.2467		2.0731	1.8578	1.718	1.6803	1.6526
2.0666	1.3604	1.1375	1.1031	1.0895		1.554	1.2991	1.2051	1.1889	1.1807		2.4609	2.0546	1.8417	1.7945	1.7637
1.9837	1.3068	1.1344	1.1292	1.1501		1.4306	1.221	1.1939	1.2137	1.2467		2.1206	1.8267	1.6417	1.5873	1.5417
1.8366	1.17	0.95862	0.93144	0.92804		1.3559	1.0986	1.0083	1.0005	1.005		1.6432	1.5267	1.472	1.4519	1.4308
2.1827	1.4201	1.1619	1.1225	1.1097		1.5889	1.3367	1.2266	1.208	1.2027		2.4023	1.8869	1.611	1.5607	1.5417
2.0795	1.3256	1.0691	1.0197	0.9886		1.3984	1.2065	1.1152	1.0911	1.0709		0.66871	0.57908	0.55107	0.54806	0.54815
2.2083	1.4262	1.1467	1.0957	1.0693		1.4928	1.2882	1.1908	1.1702	1.1588		1.5989	1.1663	1.0037	0.98702	0.98862
2.2886	1.4396	1.0798	0.98477	0.90786		1.6041	1.3359	1.1334	1.0571	0.98307		1.8846	1.2366	0.97945	0.92055	0.87834
1.8925	1.3511	1.1576	1.1161	1.0895		1.5111	1.32	1.234	1.2066	1.1807		1.8021	1.3789	1.1802	1.1329	1.099
2.145	1.3896	1.1088	1.0638	1.0492		1.5408	1.2889	1.1644	1.1425	1.1368		1.8106	1.5868	1.4629	1.4388	1.4308
1.4869	1.1107	0.98462	0.96913	0.96841		1.2936	1.1313	1.0647	1.0535	1.0489		0.98761	0.91157	0.88716	0.88275	0.87834
1.8761	1.3563	1.1512	1.1115	1.0895		1.3751	1.2611	1.2037	1.1899	1.1807		1.9806	1.708	1.5222	1.47	1.4308
1.8011	1.2338	1.0911	1.0816	1.0895		1.3757	1.1753	1.1537	1.1649	1.1807		2.2252	1.8771	1.7287	1.6884	1.6526
1.9029	1.2795	1.038	0.9768	0.92804		1.3391	1.1847	1.085	1.0456	1.005		2.0426	1.3326	1.0826	1.028	0.98862
1.7762	1.2864	1.0751	1.0171	0.96841		1.4988	1.2865	1.1541	1.1024	1.0489		0.70572	0.56125	0.47861	0.45606	0.4383
1.7415	1.0987	0.89261	0.85226	0.82713		1.2408	1.0086	0.92949	0.91079	0.89534		1.8599	0.92186	0.55953	0.48701	0.4383
1.8062	1.1577	0.96394	0.921	0.88768		1.587	1.1896	1.043	1.0012	0.96113		0.41795	0.42896	0.43767	0.43875	0.4383
2.0743	1.4465	1.2081	1.159	1.1299		1.6497	1.4136	1.2884	1.2531	1.2247		1.2028	1.0877	1.0801	1.088	1.099
1.8811	1.3476	1.1632	1.1289	1.1097		1.4606	1.3112	1.2424	1.2219	1.2027		0.83919	0.85688	0.87494	0.87801	0.87834
1.6411	1.159	0.96949	0.93031	0.90786		1.3974	1.1735	1.048	1.0115	0.98307		2.0484	1.6567	1.4243	1.3637	1.3201
1.9336	1.3341	1.1303	1.0998	1.0895		1.5108	1.2876	1.1996	1.186	1.1807		1.7759	1.573	1.3985	1.3501	1.3201
2.0981	1.4552	1.2139	1.1626	1.1299		1.5384	1.3707	1.2777	1.2491	1.2247		1.835	1.5045	1.3491	1.3254	1.3201
2.1652	1.4619	1.2552	1.2312	1.2309		1.648	1.4094	1.3368	1.3311	1.3347		1.6065	1.4047	1.3299	1.321	1.3201
2.2415	1.438	1.1829	1.1518	1.1501		1.6567	1.3582	1.249	1.2398	1.2467		1.5939	1.3112	1.1522	1.1167	1.099
1.9347	1.1832	0.9626	0.93371	0.92804		1.4083	1.1118	1.0123	1.0021	1.005		1.9563	1.2232	0.96793	0.91476	0.87834
2.2523	1.5258	1.2289	1.1589	1.1097		1.7361	1.4791	1.3094	1.2527	1.2027		1.3115	1.117	1.013	0.99473	0.98862
2.316	1.4946	1.1854	1.1165	1.0693		1.6066	1.3695	1.2361	1.1946	1.1588		0.99347	0.76536	0.67688	0.66361	0.6581
2.3326	1.58	1.2966	1.2337	1.1905		1.6339	1.4687	1.3647	1.327	1.2907		2.3466	1.9917	1.9079	1.8902	1.8748
2.2431	1.4378	1.1266	1.0647	1.029		1.6991	1.3929	1.2067	1.1547	1.1148		0.98113	0.83736	0.77806	0.76913	0.76817
1.3448	0.83686	0.6892	0.66179	0.6455		1.0595	0.81284	0.73011	0.71214	0.69818		5.2878	1.6254	0.92468	0.82574	0.76817
2.3174	1.5318	1.2543	1.2006	1.1703		1.8007	1.4987	1.3425	1.3007	1.2687		2.8824	2.1114	1.7511	1.6835	1.6526
1.3145	0.79833	0.63373	0.60317	0.58497		1.4695	1.0831	0.92304	0.88613	0.85881		2.5241	1.4146	0.88795	0.78764	0.7302
0.97995	0.69003	0.60232	0.58929	0.58497		1.1326	0.95125	0.88174	0.86762	0.85881		1.7903	1.1095	0.81172	0.75889	0.7302
0.95056	0.64618	0.5305	0.50384	0.48409		1.1555	0.91463	0.78496	0.7455	0.71044		1.2999	0.88868	0.6828	0.64488	0.6257
1.0244	0.6476	0.53295	0.52136	0.52444		1.2219	0.90858	0.78723	0.77102	0.76977		1.5827	0.96346	0.62633	0.5591	0.52126
1.0262	0.68413	0.59735	0.58682	0.58497		1.1489	0.93266	0.87435	0.86473	0.85881		2.1139	1.2724	1.0011	0.95942	0.93938
1.0492	0.68297	0.55916	0.53612	0.52444		1.2485	0.94754	0.8187	0.78909	0.76977		2.5573	1.4427	0.91412	0.80277	0.7302
0.97122	0.63113	0.52553	0.50944	0.50426		1.1995	0.89711	0.77815	0.754	0.7401		0.89901	0.58576	0.45321	0.42941	0.41689
1.1265	0.71919	0.61836	0.61448	0.62532		1.3866	1.0266	0.91988	0.91196	0.91819		2.607	1.6882	1.2744	1.1954	1.1488
1.0009	0.62681	0.53043	0.52191	0.52444		1.2041	0.87894	0.78199	0.77098	0.76977		2.563	1.438	1.0226	0.9634	0.93938
1.1413	0.77845	0.6702	0.6528	0.6455		1.3289	1.0786	0.98377	0.96268	0.94789		1.0853	0.78667	0.66661	0.64206	0.6257
1.056	0.74999	0.66566	0.66024	0.66568		1.3359	1.09	0.9997	0.98465	0.97759		1.2237	0.88613	0.75352	0.73544	0.7302
1.2524	0.82855	0.70463	0.68858	0.68586		1.5024	1.1599	1.0364	1.016	1.0073		3.2736	1.9452	1.339	1.2214	1.1488
1.2509	0.81216	0.64937	0.61157	0.58497		1.4467	1.1242	0.95213	0.90113	0.85881		2.6358	1.4807	1.0083	0.90633	0.83476
1.2433	0.8147	0.66244	0.62851	0.60514		1.2896	1.0772	0.95898	0.92144	0.8885		1.738	1.0187	0.72513	0.66499	0.6257
1.3473	0.90624	0.74212	0.70727	0.68586		1.6452	1.271	1.0895	1.0423	1.0073		2.2586	1.5011	0.96825	0.82925	0.7302
1.2984	0.87636	0.74744	0.72968	0.72622		1.5189	1.2118	1.0965	1.076	1.0667		1.8444	1.1289	0.83035	0.76974	0.7302
1.3364	0.86362	0.70372	0.67684	0.66568		1.5094	1.1803	1.0298	0.99701	0.97759		2.1876	1.1976	0.82726	0.76377	0.7302
1.5416	0.96991	0.75087	0.70043	0.66568		1.6653	1.2947	1.0881	1.0271	0.97759		1.9322	0.93583	0.55259	0.4716	0.41689
1.2966	0.87202	0.71854	0.68624	0.66568		1.4257	1.1698	1.0417	1.0061	0.97759		1.1369	0.69296	0.4903	0.44623	0.41689
1.3912	0.8648	0.69723	0.6653	0.6455		1.446	1.1516	1.0138	0.9775	0.94789		2.5062	1.449	0.90574	0.7974	0.7302
1.3347	0.876	0.74083	0.7179	0.70604		1.4557	1.1838	1.0797	1.0555	1.037		2.21	1.2778	0.92403	0.86593	0.83476
1.2676	0.88309	0.77088	0.75408	0.7464		1.592	1.2683	1.1468	1.1189	1.0965		2.6766	1.7664	1.3573	1.2877	1.2536
1.2415	0.85985	0.74178	0.71942	0.70604		1.4273	1.1822	1.0829	1.0575	1.037		1.4826	0.92726	0.62328	0.56141	0.52126
1.5859	0.96393	0.74893	0.70136	0.66568		1.6819	1.2791	1.0815	1.0262	0.97759		3.7749	2.1555	1.3833	1.238	1.1488
1.8738	0.99518	0.7259	0.67553	0.6455		1.8093	1.274	1.0382	0.98458	0.94789		3.3142	1.9127	1.1057	0.93945	0.83476
1.1115	0.82021	0.75871	0.7652	0.78676		1.3904	1.1691	1.1233	1.1326	1.1559		1.858	1.3079	0.95659	0.88041	0.83476
1.1836	0.85186	0.71069	0.6738	0.6455		1.5187	1.2188	1.0495	0.99537	0.94789		1.3289	0.89306	0.6945	0.65286	0.6257
1.2017	0.83449	0.68962	0.65327	0.62532		1.3328	1.1346	1.0059	0.96052	0.91819		2.2248	1.3486	0.96109	0.88364	0.83476
1.0842	0.71013	0.61231	0.60262	0.60514		1.2139	0.96994	0.89453	0.88657	0.8885		1.9571	1.2028	0.91284	0.86301	0.83476
1.1043	0.77229	0.64819	0.6221	0.60514		1.3325	1.0831	0.9554	0.91901	0.8885		2.0534	1.4857	1.1621	1.0899	1.0441
1.2847	0.85072	0.72945	0.71206	0.70604		1.5327	1.1855	1.0709	1.0499	1.037		2.4857	1.5201	1.1617	1.0901	1.0441
1.3533	0.84204	0.66952	0.63148	0.60514		1.3398	1.0928	0.96114	0.92179	0.8885		3.2333	1.5891	1.0956	1.0018	0.93938
1.2939	0.86078	0.72235	0.69872	0.68586		1.5242	1.1987	1.0638	1.0322	1.0073		1.6471	1.0995	0.82025	0.76405	0.7302
1.4919	0.90735	0.74843	0.72157	0.70604		1.5998	1.2292	1.0932	1.0621	1.037		1.7879	1.2409	1.0825	1.0578	1.0441
1.1985	0.83111	0.66222	0.61792	0.58497		1.3928	1.138	0.96429	0.90717	0.85881		0.96695	0.57422	0.38228	0.34049	0.31257
1.7648	1.01	0.77225	0.72939	0.70604		1.9207	1.3561	1.1201	1.0695	1.037		5.3266	2.826	1.6241	1.3942	1.2536
1.442	0.92823	0.77964	0.75651	0.7464		1.6498	1.2681	1.1358	1.1113	1.0965		3.7695	2.3843	1.7006	1.5576	1.4634
1.2521	0.76736	0.64378	0.62891	0.62532		1.3856	1.0485	0.94274	0.92654	0.91819		2.812	1.7187	1.1884	1.0952	1.0441
0.98989	0.67733	0.59492	0.58555	0.58497		1.2631	0.98042	0.88567	0.86862	0.85881		0.78338	0.55017	0.44508	0.42625	0.41689
1.1715	0.76301	0.64438	0.62927	0.62532		1.3702	1.0794	0.95964	0.93489	0.91819		1.989	1.4488	1.1639	1.0955	1.0441
0.97022	0.68812	0.61508	0.60654	0.60514		1.1253	0.9635	0.91005	0.89824	0.8885		2.0857	1.57	1.3435	1.2921	1.2536
1.0763	0.74637	0.652	0.63582	0.62532		1.3053	1.0619	0.96634	0.94153	0.91819		1.9054	1.5394	1.341	1.2914	1.2536
1.2253	0.78335	0.68681	0.68105	0.68586		1.3974	1.0808	1.0099	1.0057	1.0073		2.7969	1.9782	1.6027	1.5218	1.4634
1.0648	0.74334	0.66347	0.65196	0.6455		1.2776	1.0583	0.98622	0.96718	0.94789		1.4479	1.0607	0.89244	0.85807	0.83476
1.0539	0.72478	0.63922	0.62825	0.62532		1.1877	1.0017	0.94033	0.92769	0.91819		1.7152	1.2746	1.1006	1.0666	1.0441
1.1111	0.76949	0.69634	0.6953	0.70604		1.2568	1.0615	1.0221	1.0255	1.037		1.7516	1.2836	1.1046	1.069	1.0441
1.0233	0.69344	0.59561	0.58417	0.58497		1.1818	0.97177	0.8813	0.865	0.85881		1.2811	0.90284	0.7717	0.74706	0.7302
1.1926	0.76292	0.65531	0.64418	0.6455		1.2811	1.0316	0.9568	0.94811	0.94789		1.5118	1.0731	0.89501	0.8593	0.83476
1.1424	0.7457	0.66738	0.67043	0.68586		1.2343	1.0143	0.9786	0.98904	1.0073		2.6292	2.0791	1.8447	1.8031	1.7786
0.9641	0.69102	0.62015	0.6169	0.62532		1.1551	0.97891	0.91964	0.91413	0.91819		1.0086	0.74756	0.58824	0.54916	0.52126
0.99597	0.68313	0.58624	0.57128	0.56479		1.1565	0.94889	0.86235	0.84317	0.82913		1.7747	1.268	1.0057	0.96047	0.93938
1.0342	0.69196	0.59935	0.58771	0.58497		1.1067	0.93259	0.87355	0.86405	0.85881		1.8616	1.1859	0.97474	0.94828	0.93938
1.1547	0.75492	0.6658	0.66836	0.68586		1.4258	1.0787	0.98966	0.99142	1.0073		2.9508	2.1814	1.7481	1.6442	1.5684
1.1925	0.75538	0.66162	0.65801	0.66568		1.2923	1.0327	0.97233	0.9717	0.97759		3.1857	2.2607	1.8873	1.82	1.7786
1.2129	0.7666	0.67212	0.6645	0.66568		1.3717	1.0661	0.99006	0.98159	0.97759		2.0889	1.4257	1.1407	1.0833	1.0441
0.89869	0.67238	0.60996	0.60382	0.60514		1.1032	0.965	0.90937	0.89704	0.8885		1.3858	1.1209	1.0474	1.0419	1.0441
0.87946	0.66239	0.63301	0.6374	0.6455		1.0983	0.9579	0.94501	0.94721	0.94789		1.4836	1.2267	1.1681	1.1586	1.1488
1.0167	0.69592	0.60477	0.59124	0.58497		1.3121	1.028	0.91121	0.88254	0.85881		1.7089	1.2133	0.99616	0.958	0.93938
1.2648	0.78073	0.64862	0.63045	0.62532		1.3207	1.0455	0.94505	0.92714	0.91819		2.3138	1.3397	1.0124	0.96365	0.93938
1.0038	0.69038	0.61205	0.60469	0.60514		1.2163	0.9954	0.91662	0.90053	0.8885		1.3854	1.0799	0.90154	0.86099	0.83476
0.91671	0.62485	0.55047	0.55109	0.56479		1.2135	0.9349	0.83392	0.82467	0.82913		2.3415	1.6819	1.2897	1.2022	1.1488
0.91633	0.62675	0.54332	0.53771	0.54461		1.0764	0.88156	0.80579	0.7973	0.79945		1.8566	1.4473	1.2194	1.1737	1.1488
0.95217	0.66795	0.58399	0.57117	0.56479		1.3313	1.0158	0.8855	0.85438	0.82913		2.5138	1.8141	1.4133	1.3176	1.2536
1.0045	0.68657	0.61007	0.60369	0.60514		1.2566	0.99508	0.91181	0.89776	0.8885		2.0336	1.3693	1.1047	1.0623	1.0441
1.1379	0.72838	0.60254	0.57915	0.56479		1.3443	1.0195	0.88922	0.85632	0.82913		2.6116	1.708	1.2928	1.2062	1.1488
1.1396	0.69263	0.55506	0.52611	0.50426		1.2061	0.93723	0.81214	0.77509	0.7401		1.9908	1.3519	1.0438	0.98091	0.93938
0.97772	0.61086	0.51634	0.50557	0.50426		1.0857	0.84426	0.76171	0.74773	0.7401		1.5813	1.1645	0.99567	0.96181	0.93938
0.90933	0.64018	0.55512	0.53777	0.52444		1.1234	0.91633	0.82395	0.79663	0.76977		1.6696	1.3583	1.2081	1.174	1.1488
0.9361	0.65344	0.60526	0.61076	0.62532		1.0459	0.89962	0.88988	0.9018	0.91819		2.1071	1.6814	1.5279	1.4927	1.4634
1.1045	0.70156	0.61009	0.60277	0.60514		1.1379	0.93544	0.88865	0.88642	0.8885		2.2733	1.6817	1.4466	1.3963	1.3585
1.0973	0.77471	0.70323	0.70067	0.70604		1.3843	1.1214	1.0507	1.042	1.037		2.6226	2.0449	1.7782	1.7181	1.6735
1.1736	0.787	0.70107	0.69816	0.70604		1.311	1.0852	1.033	1.0323	1.037		3.2953	2.3781	1.9241	1.8345	1.7786
1.2218	0.74513	0.6154	0.59475	0.58497		1.3021	0.99915	0.89331	0.87246	0.85881		2.1488	1.387	1.1241	1.0762	1.0441
1.2054	0.7523	0.60999	0.58202	0.56479		1.3422	1.0278	0.89258	0.85732	0.82913		1.4171	1.0282	0.89106	0.85964	0.83476
1.0074	0.74542	0.67435	0.66665	0.66568		1.4454	1.1569	1.0321	1.0018	0.97759		1.7768	1.5654	1.4839	1.47	1.4634
1.0619	0.7361	0.64843	0.64109	0.6455		1.3373	1.064	0.96666	0.95207	0.94789		1.6779	1.292	1.1147	1.074	1.0441
0.9506	0.6568	0.58713	0.58191	0.58497		1.1009	0.91878	0.86784	0.86115	0.85881		2.3738	1.6859	1.377	1.3065	1.2536
1.5443	0.82909	0.63767	0.60489	0.58497		1.7723	1.1535	0.93654	0.89172	0.85881		3.6652	2.2107	1.5707	1.4417	1.3585
1.2109	0.79783	0.71328	0.71371	0.72622		1.3763	1.0977	1.0458	1.0522	1.0667		2.4622	1.9167	1.7296	1.6956	1.6735
0.94715	0.6385	0.59385	0.60441	0.62532		1.097	0.89083	0.87638	0.89372	0.91819		2.2926	1.7781	1.559	1.5063	1.4634
0.83565	0.57824	0.5198	0.51873	0.52444		1.1044	0.85768	0.78255	0.77351	0.76977		1.6394	1.2321	1.0179	0.97073	0.93938
1.1119	0.68936	0.57133	0.55287	0.54461		1.2193	0.94256	0.83757	0.81504	0.79945		2.1876	1.4614	1.1514	1.0879	1.0441
1.1728	0.732	0.64479	0.64806	0.66568		1.3387	1.0217	0.95332	0.95939	0.97759		2.4438	1.6881	1.3653	1.2992	1.2536
1.1107	0.70224	0.56722	0.54076	0.52444		1.3762	1.0118	0.84607	0.80347	0.76977		1.1202	0.77114	0.65171	0.63361	0.6257
1.0234	0.70476	0.59879	0.57798	0.56479		1.1795	0.98476	0.88646	0.8563	0.82913		1.1622	0.85314	0.68716	0.65021	0.6257
1.1305	0.67418	0.52875	0.50174	0.48409		1.1671	0.89856	0.77317	0.73971	0.71044		0.26925	0.16153	0.11747	0.10906	0.10413
1.1353	0.64898	0.48602	0.44943	0.42356		1.1824	0.85772	0.70029	0.65665	0.62148		0.90656	0.44761	0.34121	0.32363	0.31257
0.96797	0.56921	0.44627	0.42079	0.40339		0.96842	0.74783	0.64464	0.61593	0.59184		0.64884	0.32789	0.23442	0.2181	0.20832
0.88565	0.53771	0.43044	0.41237	0.40339		0.91729	0.70967	0.62284	0.60433	0.59184		0.37975	0.17495	0.12107	0.11076	0.10413
0.83908	0.52576	0.42491	0.40919	0.40339		0.97368	0.72539	0.62304	0.60296	0.59184		1.701	1.0629	0.73039	0.66434	0.6257
0.8931	0.54318	0.46579	0.46804	0.48409		1.0239	0.75753	0.68853	0.69263	0.71044		2.1318	1.3046	0.92074	0.86064	0.83476
0.82211	0.49037	0.40997	0.40969	0.42356		0.8657	0.66198	0.60084	0.60417	0.62148		1.4461	0.96536	0.76942	0.74137	0.7302
0.91603	0.51804	0.43338	0.43259	0.44374		0.93978	0.69805	0.63531	0.63801	0.65113		2.7361	1.6856	1.2583	1.188	1.1488
0.94837	0.56226	0.46355	0.45752	0.46391		0.93399	0.74481	0.67783	0.67444	0.68078		1.0627	0.79108	0.66132	0.63889	0.6257
0.88453	0.53917	0.45152	0.4425	0.44374		0.91322	0.72074	0.65807	0.65072	0.65113		1.3922	0.83058	0.66602	0.64037	0.6257
0.64707	0.42528	0.39401	0.4046	0.42356		0.74474	0.59118	0.5814	0.59818	0.62148		1.8005	1.4302	1.2214	1.177	1.1488
1.6964	0.82064	0.5508	0.50624	0.48409		1.6267	1.0521	0.79158	0.73991	0.71044		4.9967	3.0952	1.7164	1.4252	1.2536
0.90955	0.509	0.40226	0.3882	0.38321		0.97307	0.68848	0.58724	0.5709	0.5622		2.8208	1.8374	1.3025	1.2043	1.1488
0.90889	0.49328	0.39006	0.38075	0.38321		0.89929	0.6434	0.56301	0.55733	0.5622		2.8109	1.614	1.0128	0.90019	0.83476
0.91506	0.56747	0.45148	0.42458	0.40339		0.96325	0.75818	0.65651	0.62351	0.59184		0.79991	0.53125	0.44136	0.42594	0.41689
0.57311	0.4388	0.40191	0.39996	0.40339		0.87098	0.68843	0.6161	0.60113	0.59184		1.0328	0.76335	0.59388	0.55084	0.52126
0.98928	0.57483	0.46043	0.44606	0.44374		1.0796	0.7792	0.67223	0.65612	0.65113		1.2812	0.76124	0.50062	0.44888	0.41689
0.94891	0.62098	0.52393	0.50968	0.50426		1.0997	0.85538	0.76694	0.75036	0.7401		1.4095	0.96388	0.71935	0.66262	0.6257
1.0487	0.62958	0.51057	0.49266	0.48409		1.1877	0.86079	0.74653	0.72507	0.71044		2.9526	1.6899	1.1796	1.0925	1.0441
0.93014	0.59137	0.49504	0.48472	0.48409		1.2266	0.86922	0.74181	0.72114	0.71044		2.2044	1.4787	1.0694	0.98652	0.93938
0.81805	0.56966	0.50482	0.50015	0.50426		0.93419	0.78637	0.74263	0.73859	0.7401		1.9577	1.209	0.97695	0.9483	0.93938
0.83726	0.57514	0.48652	0.47128	0.46391		1.0217	0.81579	0.72115	0.69804	0.68078		2.1751	1.4055	1.0456	0.97713	0.93938
1.329	0.79387	0.66922	0.65293	0.6455		1.41	1.0613	0.96891	0.95632	0.94789		3.1497	1.8375	1.3672	1.2934	1.2536
0.81593	0.53859	0.44059	0.41909	0.40339		0.97401	0.75231	0.64735	0.61783	0.59184		0.8316	0.54457	0.43887	0.42314	0.41689
0.83677	0.52667	0.45282	0.44508	0.44374		0.94216	0.71981	0.66122	0.65437	0.65113		1.6897	1.1423	0.88841	0.8498	0.83476
1.1394	0.64153	0.51752	0.52007	0.54461		1.3547	0.90922	0.76986	0.7719	0.79945		3.7725	2.7346	2.0929	1.9596	1.8838
1.0377	0.72184	0.65116	0.64504	0.6455		1.0763	0.96065	0.94681	0.94784	0.94789		1.875	1.639	1.5772	1.5707	1.5684
1.0223	0.65644	0.56645	0.56058	0.56479		1.2616	0.94534	0.84465	0.83254	0.82913		2.6283	2.0432	1.6966	1.6188	1.5684
0.9796	0.66887	0.57903	0.56786	0.56479		1.1417	0.9368	0.85661	0.84067	0.82913		1.0327	0.70218	0.56269	0.53697	0.52126
0.94155	0.61503	0.54905	0.55167	0.56479		1.1201	0.87515	0.81815	0.81958	0.82913		1.3772	1.1474	1.0653	1.0515	1.0441
1.2816	0.74096	0.60717	0.59806	0.60514		1.2865	0.9773	0.88219	0.87866	0.8885		2.7916	2.0584	1.6651	1.5995	1.5684
1.2895	0.83645	0.70195	0.68578	0.68586		1.3293	1.0979	1.0136	1.0043	1.0073		1.8422	1.2159	0.98567	0.95263	0.93938
1.1634	0.83749	0.74137	0.72846	0.72622		1.4015	1.1814	1.0969	1.0786	1.0667		1.2332	1.04	1.0337	1.0391	1.0441
1.2456	0.81518	0.69387	0.68197	0.68586		1.3882	1.1185	1.019	1.0066	1.0073		1.6879	1.2199	1.0035	0.96253	0.93938
1.1616	0.75828	0.62948	0.60298	0.58497		1.204	1.011	0.91575	0.88609	0.85881		0.74113	0.44924	0.34299	0.32404	0.31257
1.0645	0.71518	0.601	0.57897	0.56479		1.2261	0.98371	0.87974	0.85254	0.82913		1.9685	1.35	1.1129	1.0697	1.0441
1.3526	0.79073	0.62752	0.59935	0.58497		1.2917	1.0197	0.90225	0.87597	0.85881		2.4563	1.4983	0.99569	0.8971	0.83476
1.0481	0.69825	0.59626	0.57744	0.56479		1.1973	0.96677	0.87641	0.852	0.82913		1.9194	1.1328	0.81073	0.75759	0.7302
1.2755	0.73223	0.55782	0.52428	0.50426		1.2321	0.93932	0.80022	0.76546	0.7401		1.644	0.86655	0.4463	0.36335	0.31257
1.5213	0.85032	0.64818	0.61786	0.60514		1.6256	1.1364	0.94184	0.90719	0.8885		3.3194	2.1365	1.3872	1.2345	1.1488
1.7131	0.89287	0.68008	0.65309	0.6455		1.571	1.1195	0.9687	0.95069	0.94789		3.7254	2.3132	1.5316	1.4108	1.3585
1.3299	0.79405	0.64615	0.62816	0.62532		1.515	1.0935	0.94878	0.92675	0.91819		3.6053	2.3559	1.809	1.7171	1.6735
1.5312	0.83205	0.62392	0.5863	0.56479		1.4928	1.0825	0.89889	0.85739	0.82913		3.0766	1.5643	0.90488	0.79392	0.7302
1.1642	0.72618	0.62423	0.61838	0.62532		1.3086	0.999	0.91691	0.91262	0.91819		2.9306	1.7287	1.3305	1.2757	1.2536
1.2896	0.7567	0.60626	0.58785	0.58497		1.4078	1.03	0.88722	0.8659	0.85881		3.1679	1.9776	1.4142	1.3126	1.2536
1.6216	0.92503	0.6709	0.6179	0.58497		1.5759	1.1825	0.95884	0.90039	0.85881		2.8094	1.5797	0.80071	0.63032	0.52126
1.3807	0.88009	0.69768	0.65578	0.62532		1.3349	1.1308	1.0014	0.95798	0.91819		1.2779	0.8078	0.58566	0.5447	0.52126
1.4	0.87079	0.68865	0.65006	0.62532		1.4514	1.1472	0.9928	0.95075	0.91819		1.2287	0.94884	0.86088	0.8451	0.83476
1.1251	0.72734	0.62895	0.62071	0.62532		1.1803	0.97131	0.91375	0.91142	0.91819		1.4324	1.1445	1.06	1.0488	1.0441
1.1316	0.75871	0.63583	0.61452	0.60514		1.2109	1.0182	0.92626	0.90369	0.8885		1.03	0.80979	0.74173	0.73307	0.7302
1.1986	0.78882	0.67198	0.65361	0.6455		1.4033	1.1032	0.9916	0.96642	0.94789		1.8174	1.4015	1.2279	1.1839	1.1488
1.1231	0.77196	0.66713	0.65097	0.6455		1.215	1.0426	0.97339	0.9578	0.94789		1.5032	1.0852	0.9573	0.94264	0.93938
1.1533	0.68555	0.52656	0.49783	0.48409		1.2408	0.91706	0.76448	0.73054	0.71044		3.2494	1.8488	1.1661	1.0267	0.93938
1.2872	0.86664	0.75745	0.74577	0.7464		1.484	1.2026	1.1137	1.1009	1.0965		2.9427	1.9372	1.5026	1.4141	1.3585
1.461	0.87543	0.69737	0.67216	0.66568		1.5389	1.1603	1.0088	0.98477	0.97759		3.9345	2.3936	1.6612	1.5316	1.4634
1.4432	0.85459	0.67373	0.64231	0.62532		1.5054	1.1441	0.98192	0.94475	0.91819		3.3504	2.0658	1.4352	1.319	1.2536
1.6802	0.92788	0.7231	0.69504	0.68586		1.6177	1.1983	1.0413	1.017	1.0073		4.6951	2.8545	1.9421	1.7738	1.6735
1.1849	0.78962	0.69681	0.69442	0.70604		1.4666	1.1434	1.0424	1.0332	1.037		2.6777	1.9579	1.5934	1.5148	1.4634
1.2176	0.75068	0.62971	0.61275	0.60514		1.3296	1.0263	0.92414	0.90406	0.8885		1.9057	1.4581	1.2308	1.1812	1.1488
1.203	0.81412	0.70871	0.69325	0.68586		1.4026	1.1499	1.0522	1.0282	1.0073		2.218	1.5214	1.2277	1.1758	1.1488
1.617	0.91503	0.71758	0.69236	0.68586		1.6522	1.2147	1.0438	1.0178	1.0073		2.9656	2.1068	1.7447	1.6926	1.6735
1.4141	0.81815	0.65816	0.64228	0.6455		1.5037	1.1167	0.96874	0.9492	0.94789		2.2409	1.4427	0.98508	0.89117	0.83476
1.2942	0.79558	0.64057	0.61596	0.60514		1.4093	1.0707	0.93026	0.90373	0.8885		2.9277	2.0051	1.5229	1.4217	1.3585
1.1494	0.6937	0.54493	0.51882	0.50426		1.2198	0.91484	0.7856	0.75855	0.7401		2.5436	1.7687	1.3052	1.209	1.1488
1.1522	0.68687	0.57338	0.56306	0.56479		1.3027	0.95838	0.84849	0.83387	0.82913		2.9304	2.0134	1.6496	1.5942	1.5684
0.83378	0.60119	0.54068	0.53761	0.54461		0.90051	0.80671	0.78543	0.78905	0.79945		1.5491	1.067	0.88654	0.85398	0.83476
0.90828	0.62471	0.56844	0.57873	0.60514		0.98359	0.84893	0.83279	0.85325	0.8885		3.0921	2.1124	1.6699	1.5992	1.5684
0.80176	0.5736	0.50759	0.50166	0.50426		0.96365	0.80867	0.75148	0.74276	0.7401		1.5572	1.3272	1.1954	1.1665	1.1488
1.0706	0.65483	0.53614	0.51566	0.50426		1.0899	0.87453	0.78315	0.75944	0.7401		1.1693	0.64095	0.46168	0.43307	0.41689
1.2112	0.70758	0.55793	0.53421	0.52444		1.1771	0.92651	0.80982	0.78467	0.76977		2.2528	1.1596	0.73603	0.66627	0.6257
1.2262	0.75571	0.60226	0.56876	0.54461		1.275	1.0016	0.87151	0.83328	0.79945		0.60387	0.44183	0.40748	0.40977	0.41689
1.1312	0.6831	0.55107	0.5241	0.50426		1.2021	0.93435	0.80951	0.77332	0.7401		0.993	0.58339	0.45454	0.43172	0.41689
1.87	1.0252	0.77473	0.73094	0.70604		1.7611	1.324	1.1182	1.0707	1.037		4.0096	2.2602	1.3022	1.1366	1.0441
1.2853	0.84699	0.74186	0.73659	0.7464		1.4439	1.1853	1.1007	1.0927	1.0965		1.8313	1.3314	1.1723	1.1538	1.1488
1.5196	0.95982	0.78478	0.74954	0.72622		1.5319	1.2681	1.1367	1.0991	1.0667		2.8384	1.6537	1.1784	1.094	1.0441
1.5435	0.95985	0.79111	0.76916	0.76658		1.656	1.2798	1.1452	1.1273	1.1262		2.794	1.5135	1.0095	0.90464	0.83476
0.81311	0.54514	0.46578	0.45882	0.46391		1.0209	0.78219	0.69107	0.67937	0.68078		1.9609	1.308	0.89737	0.79785	0.7302
0.75613	0.53892	0.51393	0.52507	0.54461		0.90872	0.76868	0.764	0.77874	0.79945		1.292	1.0396	0.95769	0.94584	0.93938
0.81967	0.5378	0.48804	0.492	0.50426		0.92195	0.74605	0.71949	0.72706	0.7401		1.3015	1.0713	0.97228	0.95263	0.93938
0.94873	0.58708	0.50606	0.50074	0.50426		0.96987	0.7803	0.73564	0.73545	0.7401		2.1987	1.5502	1.2511	1.1906	1.1488
0.82784	0.56811	0.51451	0.51545	0.52444		0.99813	0.80758	0.7636	0.7639	0.76977		1.7551	1.345	1.1314	1.0808	1.0441
1.0141	0.59925	0.49754	0.49358	0.50426		1.1409	0.83524	0.7369	0.73137	0.7401		3.1332	2.097	1.5953	1.5066	1.4634
0.81547	0.56372	0.49904	0.49677	0.50426		1.0471	0.83219	0.75339	0.74243	0.7401		2.6182	1.8347	1.4644	1.3944	1.3585
0.81308	0.52679	0.45799	0.45588	0.46391		0.98342	0.75789	0.68531	0.67849	0.68078		2.0328	1.4969	1.2381	1.1826	1.1488
1.0729	0.63764	0.52067	0.50647	0.50426		1.1584	0.86941	0.76453	0.74747	0.7401		3.0672	1.9488	1.4206	1.3166	1.2536
1.1204	0.68348	0.55087	0.53113	0.52444		1.2895	0.95612	0.81498	0.78638	0.76977		2.0461	1.3865	0.98852	0.89608	0.83476
1.3956	0.95986	0.80197	0.76816	0.7464		1.6241	1.3408	1.1844	1.1368	1.0965		1.8922	1.241	1.0071	0.9643	0.93938
1.3584	0.89695	0.74088	0.70813	0.68586		1.4749	1.2093	1.0805	1.0417	1.0073		1.7921	1.28	1.0277	0.97466	0.93938
1.2609	0.8048	0.67284	0.65285	0.6455		1.3865	1.0996	0.98519	0.96184	0.94789		1.6919	1.1421	0.90705	0.86255	0.83476
1.4729	0.86762	0.67799	0.63674	0.60514		1.5717	1.175	0.99109	0.93758	0.8885		1.496	0.96497	0.71805	0.66398	0.6257
1.6949	0.95576	0.73136	0.68249	0.6455		1.7017	1.2565	1.0555	0.9987	0.94789		3.3526	1.6067	0.93646	0.81128	0.7302
1.0403	0.70445	0.63734	0.6442	0.66568		1.3116	1.0323	0.95909	0.96135	0.97759		1.751	1.3147	1.171	1.1538	1.1488
1.9079	1.0668	0.82944	0.79649	0.78676		1.8669	1.3893	1.1991	1.1679	1.1559		2.8061	1.6773	1.175	1.0897	1.0441
1.1247	0.80595	0.71177	0.69524	0.68586		1.3455	1.1416	1.0557	1.0304	1.0073		1.6225	1.0036	0.78617	0.75014	0.7302
1.717	1.0256	0.81435	0.78148	0.76658		1.8711	1.3807	1.1848	1.148	1.1262		2.3153	1.4575	1.0584	0.98536	0.93938
0.65037	0.44061	0.39526	0.39567	0.40339		0.72466	0.60885	0.58311	0.58513	0.59184		1.4714	1.076	0.89854	0.86049	0.83476
1.3423	0.9004	0.77259	0.76184	0.76658		1.8294	1.3519	1.1667	1.1379	1.1262		3.3416	2.4931	1.9322	1.7826	1.6735
1.2238	0.82421	0.71291	0.69556	0.68586		1.5069	1.1838	1.0626	1.0331	1.0073		2.6749	2.0082	1.626	1.5319	1.4634
1.2444	0.82609	0.72222	0.71711	0.72622		1.4822	1.174	1.0741	1.0644	1.0667		2.604	1.8952	1.5586	1.4969	1.4634
1.0377	0.79651	0.74446	0.74273	0.7464		1.3064	1.1482	1.1098	1.1032	1.0965		2.1249	1.7286	1.4617	1.3995	1.3585
1.482	0.9203	0.79249	0.79131	0.80694		1.8501	1.3269	1.1841	1.1771	1.1857		4.4238	3.3125	2.6733	2.5202	2.4106
0.60604	0.41156	0.34905	0.33434	0.3227		0.67946	0.56771	0.51294	0.49319	0.47331		0.38286	0.25746	0.21981	0.21297	0.20832
1.4193	0.91226	0.72782	0.68929	0.66568		1.477	1.2053	1.0524	1.0099	0.97759		0.94689	0.756	0.66072	0.63999	0.6257
1.4948	0.93984	0.74242	0.69812	0.66568		1.6205	1.2688	1.0826	1.0268	0.97759		1.3759	0.85227	0.66598	0.63886	0.6257
1.3276	0.92583	0.8157	0.80451	0.80694		1.4146	1.2492	1.192	1.1852	1.1857		2.2297	1.5882	1.3909	1.3663	1.3585
1.4887	0.94945	0.76861	0.73099	0.70604		1.5236	1.2509	1.1115	1.0711	1.037		1.7879	1.1262	0.81734	0.76181	0.7302
1.6938	1.0527	0.83695	0.79357	0.76658		1.8027	1.419	1.2214	1.168	1.1262		1.9858	1.3427	1.1072	1.0671	1.0441
1.8676	1.0565	0.80567	0.75653	0.72622		1.7993	1.3578	1.1558	1.1048	1.0667		2.4104	1.3618	0.95148	0.87907	0.83476
1.7118	1.0632	0.84658	0.80683	0.78676		1.8634	1.4356	1.2332	1.1861	1.1559		1.8763	1.1131	0.80874	0.758	0.7302
1.1789	0.86789	0.76089	0.74637	0.7464		1.4453	1.2348	1.129	1.1064	1.0965		0.62918	0.49279	0.43864	0.42615	0.41689
1.4995	0.9814	0.74059	0.66878	0.60514		1.6125	1.3055	1.0685	0.97778	0.8885		1.2778	0.63694	0.38866	0.34212	0.31257
1.4917	0.98251	0.82107	0.79536	0.78676		1.5492	1.3109	1.1936	1.1685	1.1559		1.1663	0.8159	0.66826	0.64166	0.6257
1.7893	1.0548	0.79051	0.73025	0.68586		1.8973	1.403	1.1436	1.0697	1.0073		4.079	2.3558	1.3967	1.1839	1.0441
1.2265	0.75702	0.56421	0.51013	0.46391		1.2875	1.0059	0.81479	0.74618	0.68078		0.39794	0.24058	0.21418	0.21062	0.20832
1.1685	0.78534	0.68647	0.67967	0.68586		1.3371	1.0976	1.0172	1.0075	1.0073		1.4746	1.1102	0.90232	0.85961	0.83476
1.2911	0.87251	0.71181	0.67349	0.6455		1.4345	1.1791	1.0347	0.98855	0.94789		1.5195	0.81841	0.5179	0.45673	0.41689
1.088	0.66585	0.56748	0.5598	0.56479		1.1541	0.90344	0.83107	0.82508	0.82913		1.1832	0.75484	0.65005	0.63452	0.6257
1.0721	0.76446	0.69459	0.70226	0.72622		1.3632	1.1151	1.0426	1.0469	1.0667		3.6243	2.7212	2.176	2.0578	1.989
1.7965	0.99076	0.74491	0.69631	0.66568		1.7812	1.2949	1.0734	1.0184	0.97759		2.366	1.2077	0.75653	0.67557	0.6257
1.6867	0.94102	0.71107	0.66914	0.6455		1.6534	1.222	1.0257	0.97986	0.94789		4.4979	2.2775	1.2467	1.0544	0.93938
2.207	1.102	0.71881	0.63812	0.58497		2.0563	1.3927	1.0263	0.92991	0.85881		6.8828	3.5225	1.7446	1.3807	1.1488
1.5974	1.0091	0.81232	0.77985	0.76658		1.6996	1.3701	1.1948	1.1529	1.1262		0.72403	0.55048	0.44816	0.42793	0.41689
1.3625	0.89785	0.72453	0.68055	0.6455		1.405	1.1934	1.052	0.99912	0.94789		1.1654	0.75738	0.58088	0.54585	0.52126
1.4166	0.89723	0.76349	0.74825	0.7464		1.5362	1.2243	1.1211	1.1047	1.0965		1.0783	0.91623	0.86087	0.84707	0.83476
1.3391	0.87914	0.7724	0.76376	0.76658		1.5101	1.2357	1.1488	1.1344	1.1262		1.8611	0.99467	0.69702	0.65001	0.6257
1.3437	0.8899	0.77053	0.7612	0.76658		1.6463	1.2733	1.1468	1.1298	1.1262		1.5802	1.2072	1.0733	1.0537	1.0441
1.2654	0.87602	0.77923	0.77565	0.78676		1.6313	1.2943	1.1751	1.1586	1.1559		1.3512	1.0871	0.97756	0.95517	0.93938
1.3841	0.91489	0.76695	0.74064	0.72622		1.642	1.2923	1.1377	1.0982	1.0667		2.1316	1.4727	1.2192	1.1748	1.1488
1.1548	0.88498	0.78041	0.75902	0.7464		1.5464	1.3232	1.1805	1.1351	1.0965		1.6656	1.3521	1.0729	0.99543	0.93938
1.3658	0.94321	0.7826	0.74784	0.72622		1.6004	1.3199	1.1546	1.1057	1.0667		1.0031	0.7869	0.6719	0.64503	0.6257
1.3759	0.96999	0.80611	0.7626	0.72622		1.6688	1.3795	1.1945	1.1294	1.0667		1.2986	1.0934	0.98597	0.95967	0.93938
1.2462	0.85472	0.72319	0.69886	0.68586		1.4115	1.1848	1.0676	1.0344	1.0073		1.5775	1.0994	0.96646	0.94811	0.93938
1.2872	0.8281	0.70063	0.68575	0.68586		1.3554	1.1124	1.0222	1.0092	1.0073		1.7657	1.1571	0.98609	0.95736	0.93938
1.4651	0.87707	0.70525	0.67826	0.66568		1.5366	1.1817	1.0325	1.0001	0.97759		2.8504	1.8291	1.3264	1.2204	1.1488
1.2684	0.81754	0.69826	0.6855	0.68586		1.4719	1.1495	1.0349	1.016	1.0073		2.6452	1.9231	1.5262	1.4299	1.3585
1.1411	0.79596	0.70912	0.70235	0.70604		1.3508	1.1236	1.0509	1.0407	1.037		2.1731	1.57	1.2713	1.2012	1.1488
1.2071	0.84581	0.76784	0.76372	0.76658		1.4621	1.2143	1.146	1.1355	1.1262		2.1149	1.6585	1.4394	1.3916	1.3585
1.4147	0.88602	0.72262	0.69632	0.68586		1.4949	1.1961	1.0575	1.0264	1.0073		1.189	0.81193	0.73688	0.7312	0.7302
1.4147	0.88936	0.72362	0.68917	0.66568		1.5929	1.2297	1.0625	1.0165	0.97759		2.0089	1.1827	0.92029	0.8699	0.83476
1.7634	1.0669	0.84443	0.80612	0.78676		1.8283	1.4382	1.2401	1.1912	1.1559		3.3421	2.1117	1.4003	1.2472	1.1488
1.4858	0.9568	0.80142	0.77723	0.76658		1.6336	1.317	1.1823	1.1504	1.1262		2.6961	1.8624	1.416	1.3181	1.2536
1.0342	0.76129	0.67971	0.66873	0.66568		1.4204	1.1526	1.0324	1.0018	0.97759		1.0791	0.86877	0.76234	0.74141	0.7302
1.4634	0.93879	0.74694	0.70108	0.66568		1.7418	1.334	1.1093	1.0396	0.97759		1.7894	1.2125	0.86502	0.78444	0.7302
1.7578	0.96371	0.74026	0.70382	0.68586		1.7012	1.2615	1.0744	1.034	1.0073		3.2918	1.9744	1.202	1.0408	0.93938
1.4225	0.87953	0.7183	0.68697	0.66568		1.5261	1.1999	1.0532	1.013	0.97759		2.336	1.4644	1.0746	0.99467	0.93938
1.6389	0.94806	0.751	0.72056	0.70604		1.7323	1.2894	1.1045	1.0648	1.037		3.4094	2.1686	1.3451	1.1616	1.0441
1.317	0.8904	0.76036	0.73805	0.72622		1.574	1.2603	1.128	1.0943	1.0667		1.4383	1.1112	1.0376	1.0369	1.0441
1.3376	0.89878	0.79196	0.78299	0.78676		1.4521	1.2286	1.1642	1.1568	1.1559		1.0561	0.69118	0.61901	0.61848	0.6257
1.2939	0.88198	0.73565	0.69807	0.66568		1.3831	1.2015	1.0797	1.0303	0.97759		0.74822	0.50533	0.42815	0.41895	0.41689
1.4562	0.9762	0.84776	0.83156	0.82713		1.7349	1.3849	1.2616	1.2352	1.2154		1.0419	0.68494	0.62037	0.61991	0.6257
1.4727	0.94708	0.78251	0.75588	0.7464		1.896	1.3905	1.1741	1.1263	1.0965		1.2248	1.0037	0.93516	0.93202	0.93938
1.4054	0.88314	0.74338	0.72725	0.72622		1.7268	1.292	1.1207	1.0867	1.0667		1.6905	1.2217	1.0138	0.96893	0.93938
2.1067	1.1518	0.85178	0.78977	0.7464		2.1874	1.5472	1.2435	1.1627	1.0965		3.9643	2.4575	1.6283	1.4604	1.3585
1.3657	0.92127	0.77812	0.75457	0.7464		1.5083	1.2561	1.1387	1.1119	1.0965		1.3242	0.9078	0.77239	0.74743	0.7302
1.3034	0.85205	0.7331	0.7225	0.72622		1.5085	1.1924	1.0842	1.0698	1.0667		1.869	1.2159	1.0013	0.96357	0.93938
1.4485	0.92017	0.78469	0.76915	0.76658		1.6261	1.284	1.1645	1.1415	1.1262		1.1648	0.93539	0.78449	0.75169	0.7302
1.3456	0.92732	0.79843	0.77668	0.76658		1.4958	1.2741	1.1736	1.1471	1.1262		1.6627	1.2936	1.1732	1.1561	1.1488
1.532	1.0209	0.88672	0.8704	0.86749		1.6748	1.3843	1.2944	1.2811	1.2749		1.4477	1.0112	0.8665	0.8448	0.83476
1.1186	0.72242	0.60819	0.59956	0.60514		1.5298	1.075	0.91455	0.89353	0.8885		3.7547	2.6852	2.0809	1.9537	1.8838
1.485	0.9086	0.7298	0.69259	0.66568		1.5869	1.2183	1.0604	1.0168	0.97759		2.1069	1.2861	0.94133	0.87584	0.83476
1.9094	1.1148	0.89227	0.86002	0.84731		1.9771	1.4818	1.2988	1.2649	1.2451		5.5638	2.6659	1.6317	1.4603	1.3585
1.5216	1.0373	0.86401	0.82855	0.80694		1.8589	1.4629	1.2741	1.2244	1.1857		3.7988	2.3724	1.7091	1.5622	1.4634
1.4978	0.9803	0.79901	0.75782	0.72622		1.8094	1.3698	1.172	1.1165	1.0667		3.5483	2.3836	1.8	1.6649	1.5684
1.4328	0.96368	0.82397	0.80656	0.80694		1.6345	1.3158	1.1988	1.184	1.1857		3.2709	2.1352	1.6341	1.5306	1.4634
1.8525	1.0679	0.8267	0.79386	0.78676		1.9282	1.4174	1.2014	1.1664	1.1559		1.0253	0.78763	0.73521	0.73146	0.7302
1.34	0.85626	0.66539	0.6195	0.58497		1.6373	1.2405	0.99935	0.92395	0.85881		1.9659	1.3026	0.90494	0.80296	0.7302
1.3573	0.86166	0.73097	0.71964	0.72622		1.581	1.2124	1.0831	1.0666	1.0667		2.1082	1.4093	1.1344	1.0797	1.0441
1.3598	0.87825	0.70923	0.67152	0.6455		1.5706	1.2183	1.0434	0.99175	0.94789		1.0413	0.70035	0.56809	0.5406	0.52126
1.5696	1.0597	0.91338	0.89249	0.88768		1.6858	1.4286	1.3327	1.3139	1.3047		4.0323	2.3015	1.7254	1.6263	1.5684
1.2681	0.9242	0.80173	0.77905	0.76658		1.6627	1.3623	1.2047	1.1612	1.1262		1.7967	1.3477	1.0517	0.98239	0.93938
2.124	1.2063	0.91449	0.85944	0.82713		2.3644	1.6676	1.3493	1.2718	1.2154		4.2338	2.5328	1.6401	1.4642	1.3585
1.5625	1.0251	0.86265	0.83704	0.82713		1.7775	1.4269	1.2753	1.2399	1.2154		2.6487	1.861	1.4904	1.4113	1.3585
1.5103	1.0437	0.90077	0.87738	0.86749		1.6975	1.4415	1.3258	1.2966	1.2749		1.7089	1.2696	1.085	1.0565	1.0441
1.7212	1.0483	0.82886	0.78857	0.76658		1.6252	1.3543	1.1995	1.1575	1.1262		2.2178	1.5633	1.0976	1.0005	0.93938
1.3916	1.0203	0.88739	0.85473	0.82713		1.7445	1.4972	1.3381	1.2774	1.2154		1.8931	1.4023	1.0863	1.0017	0.93938
1.2948	0.93172	0.81576	0.79606	0.78676		1.6267	1.3411	1.2141	1.1815	1.1559		1.9779	1.4769	1.241	1.1877	1.1488
1.6947	1.1265	0.96926	0.94294	0.92804		1.8694	1.542	1.4225	1.3917	1.3642		1.8732	1.438	1.2329	1.1857	1.1488
1.9463	1.1519	0.92096	0.88377	0.86749		2.0782	1.5527	1.3423	1.3	1.2749		1.4878	1.0553	0.95934	0.94633	0.93938
1.7048	1.062	0.81384	0.7529	0.70604		1.7775	1.4319	1.193	1.1111	1.037		1.2066	0.75389	0.57156	0.54022	0.52126
1.332	0.90752	0.75675	0.72578	0.70604		1.5577	1.2714	1.1201	1.0753	1.037		1.6816	1.1834	0.9806	0.95039	0.93938
1.352	0.86391	0.74007	0.72649	0.72622		1.5282	1.1932	1.0867	1.0717	1.0667		2.7817	1.9698	1.6741	1.6135	1.5684
1.3755	0.97882	0.86258	0.84846	0.84731		1.5977	1.3594	1.2706	1.2541	1.2451		1.0704	0.98469	0.94924	0.94287	0.93938
1.5495	1.0244	0.86231	0.83686	0.82713		1.659	1.3749	1.256	1.2309	1.2154		2.6967	1.3325	0.93173	0.86937	0.83476
1.2327	0.92734	0.84575	0.84016	0.84731		1.6634	1.3611	1.2613	1.2473	1.2451		1.3038	0.87286	0.68362	0.64695	0.6257
1.4282	0.96932	0.83629	0.81525	0.80694		1.606	1.3259	1.2241	1.2015	1.1857		1.2663	1.0582	0.97384	0.95345	0.93938
1.7767	1.0917	0.87433	0.82489	0.78676		1.7253	1.4011	1.2523	1.2036	1.1559		5.5863	2.3946	1.4274	1.257	1.1488
1.9894	1.1742	0.91219	0.86814	0.84731		2.1373	1.5786	1.3268	1.2752	1.2451		6.7028	3.5655	1.9476	1.6449	1.4634
0.90758	0.63015	0.52383	0.5009	0.48409		1.3079	0.96337	0.79556	0.74982	0.71044		1.9316	1.3541	0.9177	0.80551	0.7302
1.8712	1.0696	0.80841	0.76646	0.7464		2.1856	1.4869	1.1881	1.1308	1.0965		4.3169	2.8168	1.9348	1.7628	1.6735
1.5408	0.89571	0.69183	0.6518	0.62532		1.5346	1.1783	1.0045	0.95756	0.91819		4.7482	2.7645	1.7134	1.4969	1.3585
1.1648	0.74344	0.65407	0.64612	0.6455		1.3034	1.035	0.96624	0.95614	0.94789		3.587	2.1724	1.6828	1.6073	1.5684
1.8705	0.95523	0.69018	0.64748	0.62532		1.9253	1.2856	1.011	0.95493	0.91819		4.5032	2.9434	1.8723	1.6261	1.4634
1.6156	0.85312	0.62953	0.59634	0.58497		1.6277	1.1301	0.91753	0.87776	0.85881		6.0878	3.1131	1.7658	1.5102	1.3585
1.5353	0.83521	0.64032	0.61345	0.60514		1.5534	1.1083	0.93473	0.90376	0.8885		3.9403	2.0214	1.1755	1.0253	0.93938
1.8563	0.93054	0.64814	0.59572	0.56479		1.7836	1.2121	0.94013	0.87502	0.82913		4.583	2.4626	1.2327	0.98548	0.83476
1.2681	0.78643	0.64457	0.62717	0.62532		1.594	1.1525	0.97075	0.93635	0.91819		2.0316	1.4721	1.1688	1.0947	1.0441
1.5275	0.88891	0.68231	0.64565	0.62532		1.9298	1.3031	1.0268	0.96363	0.91819		3.6946	2.4389	1.7548	1.5855	1.4634
1.9417	1.2327	1.0236	0.99646	0.9886		2.1992	1.7192	1.5211	1.4807	1.4535		1.0941	0.87344	0.83693	0.83478	0.83476
1.4748	1.002	0.86645	0.84967	0.84731		1.8276	1.437	1.2921	1.2631	1.2451		1.4902	0.90465	0.68423	0.64622	0.6257
1.3084	0.94452	0.83928	0.81943	0.80694		1.4965	1.3061	1.2321	1.2087	1.1857		1.6921	1.1128	0.9043	0.86344	0.83476
1.6257	1.0326	0.82559	0.77957	0.7464		1.7037	1.3716	1.1969	1.1438	1.0965		1.1583	0.83078	0.75065	0.73753	0.7302
1.6534	1.0808	0.86744	0.81896	0.78676		1.915	1.4804	1.2634	1.2029	1.1559		1.3413	0.98702	0.8668	0.84616	0.83476
1.2497	0.77678	0.60846	0.57122	0.54461		1.3958	1.0768	0.89891	0.84547	0.79945		0.94783	0.70822	0.57225	0.54147	0.52126
1.3658	1.0483	0.94014	0.91223	0.88768		1.8199	1.5485	1.4092	1.358	1.3047		1.2054	1.0564	1.0442	1.0447	1.0441
1.3938	0.94832	0.81412	0.7934	0.78676		1.5872	1.3168	1.1995	1.1726	1.1559		1.6844	1.224	1.0641	1.046	1.0441
1.4736	0.99281	0.87146	0.86209	0.86749		1.7548	1.4142	1.2995	1.282	1.2749		1.8506	1.3264	1.1064	1.0665	1.0441
1.5159	0.98491	0.81528	0.77718	0.7464		1.7665	1.3872	1.2071	1.1511	1.0965		2.2944	1.5804	1.2008	1.1105	1.0441
1.8601	1.123	0.87442	0.82207	0.78676		2.1666	1.5725	1.2895	1.2151	1.1559		1.6657	1.0002	0.84667	0.83423	0.83476
1.4592	0.99243	0.85332	0.83341	0.82713		1.8024	1.4441	1.2854	1.2456	1.2154		1.5921	1.3647	1.284	1.2664	1.2536
1.4311	0.96779	0.829	0.81009	0.80694		1.5292	1.3069	1.2116	1.1934	1.1857		2.4383	1.6207	1.3242	1.2778	1.2536
1.8187	1.1056	0.90694	0.88564	0.88768		2.0618	1.5229	1.333	1.3079	1.3047		3.2601	1.9441	1.3926	1.2997	1.2536
1.5153	1.031	0.87438	0.84465	0.82713		1.7183	1.4248	1.2867	1.2479	1.2154		2.5739	1.587	1.236	1.1784	1.1488
1.586	1.032	0.85518	0.82403	0.80694		1.8686	1.4612	1.272	1.2236	1.1857		1.969	1.3945	1.1328	1.0788	1.0441
1.6385	1.0358	0.82183	0.77623	0.7464		1.6666	1.3566	1.1866	1.1369	1.0965		2.9433	1.5547	0.9104	0.79593	0.7302
1.6495	1.0529	0.8774	0.85274	0.84731		1.8595	1.4457	1.2861	1.2573	1.2451		2.1682	1.4815	1.2186	1.1731	1.1488
1.624	1.0695	0.88714	0.85087	0.82713		1.6418	1.4201	1.2949	1.2538	1.2154		1.0587	0.81979	0.74617	0.73558	0.7302
1.4144	1.0486	0.92411	0.90093	0.88768		1.669	1.4543	1.3567	1.329	1.3047		1.5167	1.2442	1.0996	1.0668	1.0441
1.7763	1.139	0.94656	0.91815	0.90786		1.9892	1.5783	1.4	1.3608	1.3344		0.65854	0.46331	0.41899	0.41602	0.41689
1.4154	0.97634	0.83578	0.8146	0.80694		1.8307	1.4323	1.2577	1.2159	1.1857		3.2375	2.1551	1.6224	1.5199	1.4634
1.4489	0.99502	0.88603	0.87977	0.88768		1.8308	1.4373	1.3223	1.308	1.3047		2.4734	1.617	1.259	1.1909	1.1488
1.3659	0.93453	0.79478	0.7736	0.76658		1.5727	1.2939	1.1695	1.1427	1.1262		2.4157	1.4923	1.0649	0.98522	0.93938
1.5981	1.1175	0.96829	0.94192	0.92804		1.894	1.5753	1.4355	1.3968	1.3642		1.7906	1.2624	1.0798	1.0543	1.0441
1.3562	0.98437	0.87195	0.85431	0.84731		1.6393	1.3978	1.295	1.2676	1.2451		1.7739	1.3346	1.1313	1.0823	1.0441
1.4776	0.95328	0.81303	0.80095	0.80694		1.7341	1.3459	1.2079	1.1888	1.1857		2.3237	1.7029	1.369	1.2972	1.2536
0.75855	0.4666	0.37846	0.36625	0.36304		0.85155	0.64236	0.55614	0.5403	0.53256		2.3966	1.4041	0.88879	0.78925	0.7302
1.1866	0.81241	0.67404	0.64431	0.62532		1.58	1.2116	1.0174	0.96237	0.91819		1.1106	0.87388	0.76784	0.74532	0.7302
1.3666	0.91507	0.77046	0.75025	0.7464		1.5165	1.2508	1.1284	1.1057	1.0965		1.7612	1.3987	1.216	1.1767	1.1488
1.4022	0.93963	0.77834	0.74605	0.72622		1.6071	1.3111	1.1502	1.1043	1.0667		1.0719	0.77938	0.65849	0.63752	0.6257
1.6119	1.0102	0.82781	0.7988	0.78676		1.8214	1.3989	1.2201	1.1812	1.1559		2.7687	1.556	1.1593	1.0887	1.0441
1.3598	0.99013	0.83467	0.7884	0.7464		1.7269	1.4102	1.2303	1.1639	1.0965		1.2195	0.86205	0.69252	0.65299	0.6257
1.3791	0.89838	0.76654	0.74949	0.7464		1.5055	1.2257	1.124	1.1058	1.0965		3.2044	2.2344	1.9538	1.9096	1.8838
1.7897	1.0608	0.83421	0.79201	0.76658		1.8423	1.412	1.2111	1.1626	1.1262		2.9992	1.7158	1.2621	1.1896	1.1488
1.645	1.0726	0.94976	0.94987	0.96841		1.8671	1.4893	1.4031	1.4068	1.4237		1.6984	0.98266	0.77064	0.74217	0.7302
1.5505	1.081	0.91262	0.87446	0.84731		1.7448	1.4837	1.339	1.2905	1.2451		0.88183	1.0352	1.1086	1.1299	1.1488
1.7932	1.1339	0.9168	0.87396	0.84731		1.9206	1.5359	1.3417	1.2883	1.2451		2.6852	1.6205	1.2434	1.1828	1.1488
1.6926	1.136	0.89475	0.82568	0.76658		1.8799	1.5288	1.2972	1.2106	1.1262		1.1439	0.73833	0.58351	0.54758	0.52126
1.3596	0.99805	0.85417	0.81691	0.78676		1.6842	1.424	1.2669	1.2106	1.1559		1.3284	0.88718	0.68616	0.64733	0.6257
1.3304	0.97878	0.85475	0.82694	0.80694		1.7411	1.4315	1.2791	1.2305	1.1857		1.9949	1.2426	0.92679	0.86785	0.83476
1.6064	1.0673	0.9449	0.94531	0.96841		1.7826	1.4732	1.393	1.3985	1.4237		1.3132	1.0572	0.96274	0.94741	0.93938
1.6951	0.99925	0.787	0.75657	0.7464		1.891	1.3778	1.1607	1.1193	1.0965		2.8462	1.974	1.4464	1.329	1.2536
1.9972	1.1961	0.99819	0.98193	0.9886		2.1881	1.6366	1.4675	1.451	1.4535		2.2603	1.5872	1.3152	1.2734	1.2536
1.7362	1.1269	0.95878	0.93515	0.92804		1.9184	1.5509	1.4121	1.3829	1.3642		1.79	1.4708	1.3808	1.3667	1.3585
1.3964	0.92237	0.80076	0.78757	0.78676		1.6356	1.3045	1.1893	1.1687	1.1559		3.1314	2.3941	2.0914	2.0294	1.989
2.0659	1.1839	0.93072	0.88877	0.86749		2.2114	1.6116	1.3639	1.3106	1.2749		1.295	0.70267	0.55222	0.5318	0.52126
1.2781	0.89015	0.71521	0.68057	0.66568		1.7368	1.3134	1.0701	1.0118	0.97759		1.4665	1.1674	0.99729	0.96056	0.93938
1.8142	1.1818	0.95421	0.91046	0.88768		1.9002	1.56	1.3786	1.3339	1.3047		1.3584	0.92694	0.76872	0.74316	0.7302
1.7762	1.1811	0.98415	0.94774	0.92804		2.1779	1.711	1.4776	1.414	1.3642		2.9719	2.1328	1.5969	1.4585	1.3585
2.051	1.187	0.88419	0.82359	0.78676		2.2302	1.5907	1.2832	1.2086	1.1559		3.8732	1.7633	0.96887	0.82139	0.7302
2.2616	1.3528	1.0472	0.98639	0.94823		2.2791	1.7877	1.5222	1.4503	1.394		3.5428	1.739	1.1726	1.0899	1.0441
1.4878	1.0574	0.91655	0.89492	0.88768		1.8092	1.496	1.3582	1.3265	1.3047		1.1752	0.89191	0.77461	0.74905	0.7302
1.7076	1.1544	0.98601	0.95954	0.94823		1.9473	1.6005	1.4566	1.4214	1.394		1.8773	1.3988	1.2831	1.2654	1.2536
1.3448	0.86607	0.70244	0.6682	0.6455		1.5216	1.1942	1.0316	0.98603	0.94789		1.6367	1.2469	1.0884	1.0595	1.0441
1.937	1.2144	1.0075	0.97088	0.94823		2.1195	1.6616	1.4813	1.4349	1.394		1.837	1.3208	1.1205	1.077	1.0441
1.6885	1.1283	0.96513	0.93972	0.92804		1.8358	1.5387	1.4191	1.389	1.3642		1.7314	1.545	1.4854	1.4733	1.4634
1.7924	1.2168	1.0672	1.0501	1.0492		1.9023	1.6252	1.5486	1.5417	1.5429		2.4093	1.7147	1.5793	1.5689	1.5684
1.7644	1.2106	0.98455	0.92163	0.86749		2.0892	1.6795	1.4416	1.3571	1.2749		2.0964	1.4762	1.2411	1.1891	1.1488
1.5875	1.1506	1.0109	0.98449	0.96841		2.0463	1.6939	1.5208	1.4693	1.4237		3.4145	2.3719	1.8822	1.7629	1.6735
2.4955	1.4289	1.1358	1.0986	1.0895		2.6057	1.9295	1.6663	1.6227	1.6025		1.1674	0.9884	0.95082	0.9443	0.93938
1.8849	1.1602	0.93123	0.88979	0.86749		1.8419	1.519	1.3505	1.307	1.2749		1.8889	1.1935	0.98295	0.95381	0.93938
1.4445	0.92922	0.79413	0.78237	0.78676		1.7656	1.3404	1.1892	1.1654	1.1559		3.1764	2.1551	1.6481	1.5376	1.4634
1.898	1.2034	1.0067	0.97828	0.96841		2.035	1.6286	1.4755	1.444	1.4237		3.0978	1.9952	1.5674	1.499	1.4634
2.258	1.3242	1.0366	0.98239	0.94823		2.2915	1.7562	1.512	1.4472	1.394		2.9983	1.5317	0.98529	0.89228	0.83476
1.8652	1.2261	1.0457	1.0189	1.0088		2.1488	1.6937	1.5335	1.5025	1.4833		2.5596	1.6087	1.2474	1.1846	1.1488
1.4908	1.0778	0.94714	0.9305	0.92804		1.9561	1.6087	1.4367	1.3946	1.3642		2.1487	1.6621	1.3132	1.2181	1.1488
2.2612	1.3139	0.97333	0.89795	0.84731		2.2994	1.7171	1.3984	1.3114	1.2451		4.8496	2.513	1.4973	1.2887	1.1488
2.2126	1.2963	1.0033	0.95209	0.92804		2.2892	1.7192	1.4561	1.3983	1.3642		5.1781	3.0426	2.0149	1.8064	1.6735
2.099	1.3837	1.1858	1.1583	1.1501		2.2783	1.9003	1.7475	1.7142	1.692		1.8871	1.4381	1.2925	1.2682	1.2536
1.9429	1.2698	1.0569	1.0226	1.0088		2.2237	1.7644	1.5586	1.5129	1.4833		2.3346	1.8599	1.7095	1.6863	1.6735
1.986	1.3643	1.151	1.1037	1.0693		2.0885	1.8077	1.6662	1.619	1.5727		2.1823	1.7135	1.5972	1.5793	1.5684
0.6012	0.35942	0.27594	0.25663	0.24201		1.0704	0.8396	0.66184	0.5991	0.54124		0.75381	0.20187	0.11866	0.10679	0.099445
0.71314	0.40742	0.31436	0.29545	0.28235		1.2969	0.96672	0.7574	0.69075	0.63167		0.86235	0.32308	0.22468	0.20929	0.19897
0.63792	0.35303	0.25068	0.22408	0.20167		1.1663	0.83279	0.6002	0.52185	0.45087		0	0	0	0	0
0.55464	0.30096	0.21509	0.19588	0.1815		1.0137	0.71922	0.52161	0.45979	0.40571		0	0	0	0	0
0.59603	0.3213	0.21431	0.1856	0.16133		1.0448	0.75242	0.51542	0.43376	0.36057		0	0	0	0	0
0.64693	0.35236	0.24775	0.22209	0.20167		1.1532	0.82925	0.59466	0.51815	0.45087		0	0	0	0	0
0.51441	0.27902	0.18789	0.16276	0.14117		1.0045	0.66671	0.44968	0.37872	0.31544		0	0	0	0	0
0.52682	0.28879	0.22323	0.21051	0.20167		0.99223	0.69084	0.5376	0.49178	0.45087		0.1443	0.11574	0.10472	0.10183	0.099445
0.60181	0.31125	0.21906	0.19776	0.1815		1.1581	0.74184	0.52433	0.46017	0.40571		0	0	0	0	0
0.45	0.2774	0.22173	0.20977	0.20167		0.92298	0.67319	0.52878	0.48626	0.45087		0.61674	0.25798	0.20922	0.20282	0.19897
0.41428	0.26565	0.22432	0.2203	0.22184		0.77433	0.62032	0.53321	0.51107	0.49605		0.71054	0.54848	0.44497	0.41838	0.39825
0.48218	0.31195	0.25231	0.23609	0.22184		0.87875	0.72438	0.59799	0.54684	0.49605		0.64661	0.31492	0.22449	0.20899	0.19897
0.4563	0.28447	0.24536	0.24176	0.24201		0.85802	0.66879	0.5858	0.56239	0.54124		0.56462	0.43983	0.41186	0.40495	0.39825
0.57233	0.33752	0.26486	0.25078	0.24201		1.171	0.81328	0.63142	0.5819	0.54124		0.23278	0.1422	0.11043	0.10373	0.099445
0.87852	0.44624	0.31494	0.28557	0.26218		1.5834	1.0594	0.76199	0.66967	0.58645		0	0	0	0	0
0.70558	0.4144	0.31361	0.2863	0.26218		1.4136	1.0165	0.75756	0.66906	0.58645		0	0	0	0	0
0.69717	0.40025	0.28332	0.25055	0.22184		1.2272	0.92976	0.67827	0.58429	0.49605		0	0	0	0	0
0.80397	0.4797	0.36047	0.32928	0.30252		1.4646	1.1267	0.86549	0.76908	0.67691		0	0	0	0	0
0.7629	0.45466	0.36022	0.33896	0.3227		1.418	1.066	0.85465	0.78538	0.72217		0.63405	0.22478	0.12907	0.11138	0.099445
0.61619	0.40252	0.34068	0.32951	0.3227		1.1549	0.94683	0.81289	0.76622	0.72217		1.3528	0.73269	0.54782	0.51722	0.49802
0.51382	0.31249	0.25	0.23486	0.22184		0.96387	0.74641	0.60248	0.54906	0.49605		0	0	0	0	0
0.5405	0.28571	0.22613	0.22086	0.22184		0.99572	0.67048	0.54157	0.51495	0.49605		0	0	0	0	0
0.91794	0.48755	0.35169	0.32296	0.30252		1.6224	1.1385	0.84458	0.75469	0.67691		0.57037	0.17847	0.11646	0.10633	0.099445
0.38477	0.23029	0.1789	0.16821	0.16133		0.73327	0.54739	0.42874	0.39185	0.36057		0.61415	0.21879	0.12371	0.10844	0.099445
0.42125	0.24192	0.18533	0.17204	0.16133		0.73269	0.56947	0.4481	0.40334	0.36057		0	0	0	0	0
0.44257	0.25222	0.1984	0.18834	0.1815		0.80897	0.59647	0.47925	0.44138	0.40571		0	0	0	0	0
0.50699	0.27675	0.20734	0.19254	0.1815		0.92653	0.65298	0.49833	0.44965	0.40571		0	0	0	0	0
0.29943	0.1741	0.14401	0.14095	0.14117		0.55931	0.41142	0.34327	0.32718	0.31544		0.58349	0.19156	0.11985	0.10764	0.099445
0.27684	0.14619	0.13121	0.13488	0.14117		0.51984	0.34507	0.31462	0.31462	0.31544		0.12399	0.10842	0.10093	0.09974	0.099445
0.72183	0.43201	0.34967	0.33381	0.3227		1.3567	1.0287	0.84223	0.78062	0.72217		0	0	0	0	0
0.61325	0.36325	0.30613	0.30115	0.30252		1.1301	0.85085	0.72789	0.69863	0.67691		1.6247	0.92502	0.74487	0.71593	0.69778
0.59278	0.35758	0.27558	0.25648	0.24201		1.0702	0.83147	0.65531	0.59526	0.54124		0.22882	0.12027	0.10182	0.10015	0.099445
0.44275	0.29191	0.26763	0.27217	0.28235		0.78674	0.65493	0.6255	0.62621	0.63167		0.6954	0.43407	0.32491	0.30683	0.29857
0.52695	0.35915	0.31908	0.31803	0.3227		0.93937	0.82902	0.76505	0.74315	0.72217		0.29117	0.37755	0.46509	0.48583	0.49802
0.94217	0.50252	0.39075	0.38093	0.38321		1.5243	1.1059	0.9176	0.88046	0.85804		2.6014	1.6586	1.1466	1.0515	0.99801
0.82959	0.50342	0.40242	0.37991	0.36304		1.5925	1.2108	0.96688	0.88612	0.81274		2.0518	0.63059	0.3664	0.32489	0.29857
0.79864	0.48495	0.38651	0.37013	0.36304		1.445	1.1138	0.91129	0.85537	0.81274		2.2402	1.2574	0.76567	0.66337	0.59786
0.83791	0.48382	0.39501	0.38467	0.38321		1.5441	1.1433	0.94439	0.8953	0.85804		2.6695	1.1266	0.70611	0.63825	0.59786
0.67542	0.39102	0.28058	0.2494	0.22184		1.3221	0.95201	0.67929	0.58391	0.49605		0	0	0	0	0
0.56695	0.35046	0.30229	0.29974	0.30252		1.0132	0.79497	0.71133	0.69223	0.67691		1.3695	0.91022	0.67265	0.62562	0.59786
0.57142	0.34063	0.29452	0.29496	0.30252		0.99863	0.77443	0.69458	0.68213	0.67691		1.6176	1.0166	0.76834	0.72382	0.69778
0.50703	0.34261	0.30684	0.3106	0.3227		0.88802	0.75776	0.71679	0.71563	0.72217		1.0357	0.9022	0.82223	0.80569	0.79778
0.83501	0.45234	0.35686	0.34505	0.34287		1.6512	1.0884	0.8525	0.80135	0.76745		2.911	1.2347	0.73155	0.64916	0.59786
0.47266	0.32182	0.28452	0.2814	0.28235		0.87941	0.74318	0.672	0.65057	0.63167		0.95414	0.7976	0.72198	0.70677	0.69778
0.56	0.33285	0.29444	0.30324	0.3227		1.0173	0.75596	0.69214	0.6999	0.72217		1.0077	0.76442	0.63874	0.61289	0.59786
0.48551	0.31205	0.28308	0.28909	0.30252		0.86862	0.70672	0.66627	0.66807	0.67691		1.0399	0.71642	0.54535	0.51397	0.49802
0.49869	0.31824	0.28572	0.29055	0.30252		0.8784	0.72288	0.67205	0.67048	0.67691		0.99187	0.8352	0.78757	0.78899	0.79778
0.41952	0.2854	0.2553	0.25608	0.26218		0.78267	0.65887	0.60378	0.59274	0.58645		1.2982	1.0187	0.85493	0.81949	0.79778
1.1929	0.57893	0.37049	0.34528	0.34287		1.9679	1.2437	0.86189	0.7948	0.76745		3.052	2.181	1.4827	1.306	1.1986
0.53572	0.36514	0.2976	0.28642	0.28235		0.94511	0.79122	0.68713	0.656	0.63167		1.1003	0.9703	0.86256	0.82556	0.79778
0.55684	0.37811	0.33889	0.33823	0.34287		0.98454	0.84955	0.79169	0.77776	0.76745		1.1924	0.9655	0.84276	0.81564	0.79778
0.56921	0.39838	0.35823	0.35777	0.36304		1.0787	0.90688	0.83912	0.82418	0.81274		1.3752	1.0864	0.93924	0.91077	0.89785
0.72574	0.46125	0.42333	0.42979	0.44374		1.4004	1.0759	1.0016	0.99489	0.99406		2.544	1.4384	1.0848	1.0291	0.99801
0.67904	0.41463	0.33602	0.3254	0.3227		1.1944	0.93022	0.78707	0.75003	0.72217		1.5473	1.1222	0.87821	0.82729	0.79778
0.72268	0.47214	0.42405	0.42177	0.42356		1.3166	1.0622	0.98918	0.96951	0.9487		1.331	1.0818	1.0193	1.0074	0.99801
0.63542	0.4166	0.36666	0.37008	0.38321		1.111	0.93538	0.86599	0.85793	0.85804		1.3388	1.0791	0.93768	0.91116	0.89785
0.76683	0.48057	0.39815	0.39423	0.40339		1.3867	1.0724	0.92917	0.90744	0.90337		1.7912	1.4426	1.1956	1.1347	1.0982
0.73051	0.44303	0.34767	0.33842	0.34287		1.3421	0.99394	0.81459	0.78081	0.76745		1.8354	1.4074	1.1177	1.0433	0.99801
0.75871	0.44661	0.36815	0.36888	0.38321		1.3147	0.9817	0.86023	0.85075	0.85804		1.7263	1.2933	1.0585	1.0148	0.99801
0.59745	0.37682	0.32254	0.31934	0.3227		1.1541	0.87348	0.7611	0.73802	0.72217		1.6125	1.1105	0.86395	0.81907	0.79778
0.70236	0.48409	0.42502	0.42028	0.42356		1.2837	1.1069	1.0041	0.97322	0.9487		1.0027	0.68708	0.53968	0.51245	0.49802
0.77413	0.51257	0.43785	0.4273	0.42356		1.4354	1.1857	1.0392	0.99198	0.9487		1.1416	0.87188	0.74051	0.7139	0.69778
0.7575	0.48443	0.40816	0.4009	0.40339		1.335	1.1038	0.96607	0.92957	0.90337		1.1305	0.75998	0.62258	0.6047	0.59786
0.74031	0.47823	0.39646	0.38572	0.38321		1.3019	1.0641	0.92932	0.89054	0.85804		1.348	1.0919	0.89422	0.83807	0.79778
0.74249	0.48735	0.39127	0.37322	0.36304		1.3482	1.0817	0.90845	0.85632	0.81274		1.6743	1.3364	1.0525	0.96468	0.89785
0.78367	0.50751	0.45207	0.45368	0.46391		1.4944	1.1654	1.0597	1.045	1.0394		1.6809	1.2318	1.0386	1.0087	0.99801
0.69458	0.45508	0.38057	0.36868	0.36304		1.2556	1.0347	0.89931	0.85422	0.81274		1.2455	0.94385	0.76386	0.72372	0.69778
0.66628	0.46093	0.39787	0.38784	0.38321		1.2223	1.0435	0.93337	0.89475	0.85804		1.3231	1.1125	0.96974	0.92915	0.89785
0.90721	0.53454	0.40107	0.38371	0.38321		1.5913	1.1703	0.93112	0.88137	0.85804		2.222	1.7211	1.3025	1.1812	1.0982
0.73339	0.49888	0.43212	0.42434	0.42356		1.3304	1.1271	1.0136	0.97879	0.9487		1.7659	1.3271	1.08	1.028	0.99801
0.69578	0.46617	0.38578	0.37103	0.36304		1.2622	1.0445	0.90192	0.85463	0.81274		1.0906	0.88241	0.7522	0.71938	0.69778
0.7102	0.49079	0.4403	0.43883	0.44374		1.312	1.1073	1.0307	1.0114	0.99406		1.4339	1.1227	0.95662	0.92023	0.89785
0.67644	0.43756	0.36943	0.36236	0.36304		1.1919	0.97587	0.86277	0.83396	0.81274		1.1344	0.89906	0.75567	0.72112	0.69778
0.75657	0.54008	0.46159	0.44885	0.44374		1.4174	1.206	1.0713	1.0296	0.99406		1.5995	1.4142	1.2679	1.2257	1.1986
0.88814	0.57227	0.48509	0.47924	0.48409		1.6256	1.2746	1.1244	1.0979	1.0848		2.0815	1.6708	1.4021	1.3378	1.299
0.92897	0.61744	0.53945	0.52905	0.52444		1.6869	1.4145	1.2681	1.2204	1.1756		1.5203	1.1697	0.97339	0.929	0.89785
0.62157	0.41726	0.36599	0.3618	0.36304		1.1447	0.95679	0.86285	0.83621	0.81274		1.6853	1.3161	1.096	1.04	0.99801
0.70288	0.45497	0.39549	0.39485	0.40339		1.2431	1.0085	0.92157	0.90823	0.90337		1.5524	1.3149	1.1629	1.1244	1.0982
0.67581	0.44365	0.38912	0.39128	0.40339		1.1653	0.98356	0.912	0.90351	0.90337		1.648	1.3344	1.1499	1.114	1.0982
0.57095	0.35887	0.29434	0.28513	0.28235		1.0018	0.81832	0.69885	0.66224	0.63167		1.1097	0.78576	0.63038	0.60691	0.59786
0.56756	0.40989	0.38323	0.39001	0.40339		1.0371	0.9152	0.88967	0.89414	0.90337		1.1164	1.0967	1.1012	1.1011	1.0982
0.85089	0.58326	0.51071	0.50342	0.50426		1.5856	1.3326	1.2034	1.1644	1.1302		1.1574	0.93641	0.82983	0.80925	0.79778
0.8375	0.55631	0.47573	0.47308	0.48409		1.5011	1.2353	1.1103	1.0897	1.0848		1.4756	1.2282	1.1222	1.1054	1.0982
0.81617	0.5247	0.43224	0.41472	0.40339		1.5159	1.1912	1.0153	0.95754	0.90337		1.4878	1.1473	0.97374	0.93015	0.89785
0.82038	0.55937	0.49119	0.48446	0.48409		1.5224	1.275	1.154	1.1182	1.0848		1.4181	1.1809	1.0439	1.0148	0.99801
0.82396	0.58297	0.49331	0.47543	0.46391		1.5138	1.3019	1.1498	1.0936	1.0394		1.5382	1.2264	0.99866	0.93798	0.89785
0.81245	0.55092	0.45856	0.44579	0.44374		1.4709	1.2203	1.0667	1.0248	0.99406		1.6358	1.3782	1.1884	1.1346	1.0982
0.79959	0.56382	0.4931	0.48468	0.48409		1.4297	1.2813	1.1658	1.1238	1.0848		1.5543	1.2709	1.1353	1.1107	1.0982
0.8551	0.59035	0.51844	0.51617	0.52444		1.5373	1.314	1.2114	1.1898	1.1756		1.5948	1.2894	1.0806	1.0294	0.99801
0.92402	0.54938	0.45485	0.45238	0.46391		1.6437	1.2224	1.0611	1.0412	1.0394		1.8479	1.3873	1.0996	1.0355	0.99801
0.9004	0.53816	0.42639	0.41723	0.42356		1.6226	1.1984	0.99697	0.96175	0.9487		2.1741	1.5837	1.1652	1.0619	0.99801
0.80619	0.492	0.40706	0.39994	0.40339		1.463	1.1253	0.96329	0.92712	0.90337		1.9779	1.3825	1.0886	1.0317	0.99801
0.83035	0.49777	0.41652	0.41394	0.42356		1.489	1.1279	0.97996	0.9565	0.9487		2.0202	1.4339	1.1057	1.0386	0.99801
0.86438	0.5563	0.46942	0.46155	0.46391		1.5395	1.2438	1.1005	1.0655	1.0394		1.7509	1.3317	1.083	1.0287	0.99801
0.8136	0.55405	0.50532	0.51021	0.52444		1.5891	1.308	1.2022	1.1845	1.1756		1.8858	1.5244	1.3409	1.3109	1.299
0.8239	0.53507	0.47456	0.47502	0.48409		1.517	1.226	1.1194	1.0987	1.0848		1.5754	1.2969	1.149	1.1178	1.0982
0.69183	0.45523	0.40574	0.40951	0.42356		1.2756	1.0398	0.95666	0.94741	0.9487		1.1279	0.84981	0.73134	0.70955	0.69778
0.78491	0.51717	0.43928	0.43504	0.44374		1.4729	1.171	1.0286	1.0028	0.99406		1.6141	1.2906	1.0824	1.0302	0.99801
0.82892	0.55049	0.46728	0.46018	0.46391		1.4922	1.2098	1.0817	1.055	1.0394		1.4865	1.1949	1.0424	1.0118	0.99801
0.75489	0.51646	0.42265	0.40827	0.40339		1.3666	1.1174	0.96737	0.92972	0.90337		1.5619	1.3431	1.1802	1.1321	1.0982
0.7486	0.44912	0.37763	0.37548	0.38321		1.3088	1.0002	0.88306	0.86505	0.85804		1.9487	1.4568	1.196	1.1375	1.0982
0.76124	0.47803	0.3944	0.38483	0.38321		1.4178	1.078	0.91734	0.8825	0.85804		2.094	1.6263	1.3243	1.2492	1.1986
0.77612	0.52739	0.45835	0.45548	0.46391		1.4626	1.1886	1.0719	1.0496	1.0394		1.9194	1.5354	1.3488	1.3134	1.299
0.84426	0.51141	0.42988	0.42959	0.44374		1.5009	1.1405	1.0041	0.98926	0.99406		1.4997	1.1076	0.89157	0.83696	0.79778
0.70258	0.47698	0.41424	0.40575	0.40339		1.3342	1.0939	0.96986	0.93365	0.90337		1.0918	0.83408	0.72911	0.70908	0.69778
0.78306	0.45747	0.39034	0.39162	0.40339		1.375	1.0396	0.92493	0.90914	0.90337		1.291	0.90952	0.73985	0.71136	0.69778
0.73545	0.48563	0.42984	0.43197	0.44374		1.2604	1.0717	1.0052	0.9961	0.99406		1.1659	1.0031	0.92723	0.91013	0.89785
0.94871	0.55295	0.43965	0.42551	0.42356		1.7728	1.3005	1.0522	0.99175	0.9487		2.8166	1.6253	1.0011	0.87707	0.79778
0.65273	0.38772	0.33253	0.33365	0.34287		1.1353	0.87636	0.78411	0.77181	0.76745		1.5723	1.3056	1.1575	1.123	1.0982
0.77388	0.47878	0.43015	0.4338	0.44374		1.2908	1.0549	1.0005	0.99637	0.99406		1.8685	1.5452	1.4296	1.4106	1.3994
0.63395	0.43437	0.38289	0.37977	0.38321		1.1223	0.95471	0.88701	0.87077	0.85804		1.1884	1.0089	0.93301	0.9139	0.89785
0.72636	0.46821	0.42596	0.43111	0.44374		1.2929	1.0647	1.0032	0.99646	0.99406		1.6792	1.3519	1.186	1.1391	1.0982
0.64441	0.4659	0.43987	0.44825	0.46391		1.1807	1.0521	1.0296	1.0329	1.0394		1.4588	1.2952	1.2294	1.2129	1.1986
0.72901	0.48965	0.42974	0.4238	0.42356		1.2768	1.1046	1.0107	0.97912	0.9487		1.4725	1.2678	1.1519	1.1217	1.0982
0.67166	0.44115	0.39143	0.39304	0.40339		1.2097	1.0081	0.92619	0.91109	0.90337		1.2449	0.97507	0.84119	0.81428	0.79778
0.79169	0.50164	0.4535	0.47061	0.50426		1.3902	1.1158	1.0654	1.0885	1.1302		1.6556	1.4447	1.3486	1.3223	1.299
0.68738	0.49443	0.4809	0.49803	0.52444		1.3182	1.1337	1.1289	1.1487	1.1756		1.4963	1.371	1.3226	1.3093	1.299
0.8901	0.52587	0.44785	0.44912	0.46391		1.5639	1.2023	1.0634	1.0436	1.0394		2.5216	1.7024	1.2673	1.1681	1.0982
0.96325	0.64277	0.56187	0.5579	0.56479		1.7039	1.44	1.3172	1.2878	1.2665		2.1738	1.7106	1.4663	1.4209	1.3994
0.86066	0.51261	0.4286	0.42164	0.42356		1.5005	1.1494	1.0023	0.97066	0.9487		2.1679	1.542	1.2791	1.2297	1.1986
0.85927	0.53042	0.4568	0.45564	0.46391		1.4753	1.1818	1.0751	1.0546	1.0394		1.7872	1.4463	1.283	1.238	1.1986
0.79168	0.52204	0.47115	0.47345	0.48409		1.4194	1.1888	1.1096	1.0944	1.0848		1.3269	1.0877	1.014	1.0035	0.99801
0.89785	0.58224	0.50054	0.48941	0.48409		1.6031	1.3186	1.1757	1.1295	1.0848		1.923	1.439	1.2	1.142	1.0982
0.91919	0.60178	0.51016	0.49384	0.48409		1.9018	1.4397	1.2113	1.1441	1.0848		0.9982	0.76889	0.70556	0.69883	0.69778
0.88275	0.5875	0.51512	0.51475	0.52444		1.5713	1.2979	1.1965	1.1822	1.1756		2.298	2.0084	1.8678	1.8314	1.8022
0.73724	0.49384	0.44446	0.44931	0.46391		1.3455	1.1163	1.0401	1.0347	1.0394		1.8146	1.5737	1.4558	1.425	1.3994
0.84159	0.53928	0.46926	0.47069	0.48409		1.4961	1.2003	1.0956	1.084	1.0848		1.5312	1.2567	1.0835	1.0351	0.99801
0.87473	0.53949	0.47	0.47896	0.50426		1.5366	1.2009	1.1018	1.1061	1.1302		1.913	1.5654	1.4196	1.4004	1.3994
0.88571	0.52961	0.43416	0.43144	0.44374		1.4522	1.1465	1.0106	0.99342	0.99406		1.8284	1.4889	1.2823	1.2321	1.1986
0.79955	0.48713	0.38609	0.3697	0.36304		1.4565	1.1295	0.91898	0.85924	0.81274		2.5424	1.5773	1.0725	0.96718	0.89785
0.84434	0.54825	0.47849	0.47634	0.48409		1.4618	1.2255	1.1163	1.0952	1.0848		1.6856	1.2411	0.99086	0.93515	0.89785
0.85239	0.53425	0.50026	0.51654	0.54461		1.5359	1.2319	1.1835	1.1966	1.2211		2.549	1.934	1.6988	1.6443	1.6006
0.65777	0.45154	0.405	0.40169	0.40339		1.1878	1.0424	0.96472	0.93446	0.90337		1.2094	0.82594	0.65509	0.62061	0.59786
0.7132	0.45891	0.39464	0.38612	0.38321		1.2654	1.0266	0.9181	0.88604	0.85804		1.0945	0.76059	0.63486	0.61191	0.59786
0.59315	0.40706	0.36386	0.36098	0.36304		1.0837	0.91788	0.84927	0.82984	0.81274		1.1009	0.88215	0.81194	0.80208	0.79778
0.66434	0.45169	0.41843	0.42726	0.44374		1.1826	1.0085	0.98141	0.98659	0.99406		1.3801	1.26	1.2724	1.2873	1.299
0.65256	0.49013	0.4834	0.49983	0.52444		1.2269	1.1235	1.1401	1.1567	1.1756		1.3536	1.2333	1.3246	1.3672	1.3994
0.64724	0.41102	0.33454	0.31699	0.30252		1.1724	0.93464	0.78158	0.72813	0.67691		0.73146	0.51652	0.42744	0.4099	0.39825
0.59406	0.37556	0.33055	0.33265	0.34287		1.03	0.82945	0.76897	0.76409	0.76745		1.0659	0.87097	0.82172	0.81036	0.79778
0.87456	0.56079	0.48992	0.48372	0.48409		1.5749	1.2671	1.1461	1.114	1.0848		1.209	1.0443	1.0016	0.99819	0.99801
0.53416	0.38164	0.35258	0.35537	0.36304		0.94893	0.83229	0.81529	0.81434	0.81274		0.54334	0.42034	0.3353	0.31248	0.29857
0.67716	0.44996	0.3999	0.39815	0.40339		1.205	1.0348	0.94617	0.92218	0.90337		2.0282	1.1728	0.87649	0.82679	0.79778
0.65695	0.43498	0.36617	0.35261	0.34287		1.2655	0.99527	0.85415	0.80941	0.76745		0.99068	0.75016	0.63348	0.61048	0.59786
0.96599	0.5539	0.47044	0.47118	0.48409		1.7471	1.262	1.1085	1.0895	1.0848		2.8426	1.8002	1.3328	1.2469	1.1986
0.76891	0.46189	0.39747	0.39625	0.40339		1.3176	1.0352	0.93222	0.914	0.90337		2.1155	1.5424	1.2651	1.2189	1.1986
0.94883	0.65088	0.59455	0.59624	0.60514		1.7429	1.4797	1.396	1.3763	1.3575		1.8464	1.6513	1.6084	1.6038	1.6006
0.95137	0.59084	0.51763	0.52385	0.54461		1.6464	1.3189	1.2153	1.2107	1.2211		2.1958	1.7652	1.5072	1.444	1.3994
0.92664	0.59736	0.51306	0.51153	0.52444		1.7065	1.3499	1.1997	1.1779	1.1756		2.0424	1.6852	1.4345	1.3589	1.299
[truncated: 441 more rows]
