# Supplementary material for: Localized inhibition in the Drosophila mushroom body
Source: eLife. 2020 Sep 21;9:e56954. doi: 10.7554/eLife.56954 (PMC7541083; doi:10.7554/eLife.56954)
Supplement: Figure 8—figure supplement 3—source data 1. [file elife-56954-fig8-figsupp3-data1.xlsx]

## Sheet: fig8-supp3A
g-m	g-t	g-d	ab-p	ab-s	ab-m	ab-c	a'b'-ap1	a'b'-ap2	a'b'-m
1.02173	1.55811	1.05191	0.950566	1.33175	1.46953	1.0704	0.98733	1.26337	1.16677
1.11495	1.31768	1.10343	1.06244	1.3785	1.13258	1.29691	0.983431	1.25666	1.14601
1.07576	1.03511	1.04667	1.01674	1.24336	1.15545	1.16628	1.01634	1.31176	1.19194
0.996185	1.14082	1.2092	0.967463	1.19554	1.22194	1.0137	0.923944	1.36981	1.17281
1.14959	1.63065	1.21677	1.04525	1.15921	1.14886	1.04483	0.925928	1.33841	1.14124
1.17509	1.32704	0.991273	0.988944	1.23202	1.24853	1.15319	0.941553	1.29574	1.2011
1.03751	1.4078	1.0029	1.00764	1.21219	1.19955	1.00446	0.982395	1.28364	1.14546
1.3795	0.733576	1.04365	1.05671	1.22779	1.38658	0.992226	0.937371	1.3497	1.20623
1.15696		1.15278	1.02765	1.25438	1.20409	1.1581	0.909297	1.31261	1.18033
0.988652		1.57923	0.993994	1.32923	1.32889	0.922976	0.93613	1.31761	1.22327
1.02762		1.37298	1.1541	1.50967	1.33591	0.774334	0.983699	1.28338	1.22487
1.18615		1.5167	1.17319	1.34968	1.50241	0.878751	0.98072	1.33472	1.35498
1.18859		1.46938	1.21397	1.28379	1.44669	0.858021	1.0528	1.3075	1.09702
1.15808		1.23883	1.18851	1.30783	1.28959	1.171	0.997808	1.32007	1.08148
1.29881		1.40389	1.17018	1.13856	1.64524	1.58342	1.00827	1.3137	1.04207
1.09189		1.18135	1.10381	1.10555	1.51886	1.41357	1.04645	1.35012	1.14311
1.22527		1.10272	1.17762	1.069	1.50941	1.22723	1.05544	1.42044	1.10349
1.09139		1.06169	1.09802	1.0166	1.66534	1.46456	1.01827	1.36329	1.10521
1.38521		1.00369	1.1285	1.11241	1.42567	1.41798	0.991936	1.33618	1.18339
1.09301		1.29964	1.2584	1.01959	1.44604	1.15489	1.01202	1.18861	1.10186
1.34357		1.24828	1.37122	1.14481	1.4557	0.963872	1.01763	1.19143	1.03954
1.16295		1.18233	1.24468	1.17603	1.59199	0.995719	1.06365	1.23281	1.14616
1.14629		1.17191	0.977651	1.13784	1.42732	1.62241	0.983136	1.21863	1.1164
1.11693		1.22337	1.15303	1.1346	1.68185	0.733273	1.0732	1.20225	1.16926
1.12987		1.31177	1.1356	1.0629	1.80926	0.732687	1.02535	1.17568	1.08124
0.98182		1.27788	1.1016	1.22458	1.39037	0.808975	1.05061	1.23445	1.15191
1.18244		1.11827	1.18173	1.1155	1.51868	0.926525	1.01259	1.18916	1.13273
1.32878		1.12914	1.15975	1.04436	1.33279	0.559307	1.04483	1.2193	1.19079
1.10878		1.17318	1.21116	1.12973	1.21388	0.519839	1.03724	1.26645	1.15984
1.15787		1.1208	1.12672	1.2026	1.33253	1.35669	1.15839	1.23719	0.965555
1.28368		1.32547	1.11212	1.43497	1.53272	1.13008	1.05186	1.22239	0.948643
1.36604		1.29594	1.28049	1.37652	1.3398	1.07024	1.12314	1.19437	1.04466
1.18375		1.51993	1.31452	1.26309	1.52418	0.786742	1.09628	0.97769	0.997121
1.21126		1.26363	1.039	1.13118	1.59984	0.939375	1.0227	1.0962	1.00261
1.41277		1.26914	0.949574	1.14148	1.39277	1.52428	1.07084	1.05337	1.0022
1.19933		1.12906	0.914064	1.21439	1.92071	1.59252	0.916056	1.07573	0.960949
1.35526		1.23975	0.988107	0.942902	1.64976	1.44498	1.10902	1.05621	1.00492
1.32675		1.16452	1.02544	1.06375	1.38564	1.54411	0.893854	1.11579	0.96617
1.26269		1.19898	1.13966	1.17931	1.26312	1.32213	0.89834	1.06716	1.08209
1.35615		0.949821	1.07705	1.1343	1.37016	1.01319	0.783001	1.09628	0.926319
1.27333		1.20018	0.99845	1.14962	1.12532	0.998634	0.85746	1.22036	1.07565
1.28553		1.00662	1.04709	1.12765	1.3053	0.888017	0.821547	1.0402	1.242
1.29192		1.13188	0.993937	1.08147	1.39744	1.65124	0.856967	1.08737	1.22145
1.29248		1.10242	1.23172	1.03367	1.27763	0.879405	0.909137	1.10696	1.19872
1.24795		1.26931	1.34444	1.04813	1.18773	1.01728	0.865656	1.09234	1.29718
1.3773		1.42973	1.37625	1.03084	1.25677	0.868624	0.891357	1.09118	1.31177
1.21413		1.17034	1.38172	1.07836	1.18176	0.878402	1.06907	1.10139	1.27445
1.26948		1.03776	1.29008	1.20088	1.28113	0.78267	1.07115	1.19372	1.34815
1.19164		0.996644	1.27567	1.17622	1.23431	1.96795	1.08453	1.10141	1.19099
1.30551		0.979328	1.58508	1.14985	1.15506	0.945114	1.15108	1.19722	1.27027
1.34867		1.44868	1.34656	1.17743	1.1565	0.984542	1.1667	1.07699	1.23264
1.44242		1.29851	1.34233	1.20913	1.10667	1.07867	1.15199	1.10843	1.16943
1.26218		1.15988	1.45219	1.10046	1.42578	1.40039	1.093	1.1005	1.27137
1.12923		1.44419	1.40604	1.12075	1.29228	1.19442	1.10173	1.0959	1.1998
1.249		1.64077	1.4992	0.930426	1.37173	1.31662	1.13233	1.17125	1.115
1.12457		1.36542	0.816933	1.03124	1.10321	1.111	1.13079	0.976178	1.19101
1.17678		1.23401	0.714133	0.98273	1.09831	1.38668	1.17659	0.92006	1.08219
1.41516		1.27737	1.47393	1.01204	1.3121	1.34214	1.14968	0.97914	1.16108
1.21116		1.47603	1.54382	1.18844	1.32072	1.31467	1.18738	1.05716	1.09261
1.14876		1.29743	1.65937	1.30422	1.21629	1.15414	1.06874	1.18587	1.26273
1.17822		1.40061		1.23027	1.2135	1.28366	1.1742	1.1745	1.27117
1.10588		1.21326		1.29259	1.07638	1.43539	1.17546	1.24699	1.26265
1.42049		1.47757		1.29273	1.33133	1.33502	1.15061	1.15938	1.23215
1.13194		1.59617		1.29314	1.2566	1.3019	1.17375	1.04204	1.36892
1.19698		1.47871		1.32972	1.34433	1.34821	1.19077	1.17054	1.25156
1.26328		1.35276		1.36617	1.20609	1.49443	1.21813	1.21772	1.25735
1.19303		1.35155		1.21316	1.0857	1.2556	1.17977	1.03911	1.21739
1.12098		1.38963		1.21829	1.12336	1.22228	1.22176	1.08407	1.00755
1.23404		1.50355		1.29543	1.04586	1.59132	1.19687	1.1541	1.19516
1.0567		1.42336		1.22632	1.13788	1.33041	1.22735	1.08623	0.928431
1.02558		1.42891		1.18978	1.38426	1.26224	1.22954	1.14071	1.45005
1.09093		1.36165		1.29621	1.31096	1.31199	1.22756	1.10457	1.18347
1.22326		1.44363		1.29599	1.30211	1.19189	1.2367	1.32038	0.993153
1.09616		1.32417		1.15587	1.34221	1.41737	1.2479	1.28956	0.965408
1.1751		1.54058		1.27722	1.44545	1.62557	1.13777	1.14741	1.19438
1.12833		1.48216		1.16875	1.33729	1.68692	1.16681	1.0925	0.935438
1.08645		1.13587		1.23541	1.10091	1.14475	1.32841	1.01122	1.23339
1.1007		1.00697		1.18927	1.77231	1.2431	1.29368	0.969876	1.19349
1.19657		1.42433		1.30724	1.3763	1.16533	1.35911	1.05041	1.08774
0.987037		1.70819		1.24713	1.09699	1.00179	1.333	0.971843	0.889892
1.07057		1.53611		1.22437	1.10444	1.03708	1.2962	1.29812	1.02518
1.06482		1.45543		1.28052	1.21927	1.58557	1.35281	1.08096	0.830083
1.68967		1.68972		1.16053	1.33866	1.50106	1.34233	1.21108	1.00638
1.21079		1.64053		1.38101	1.37618	1.5159	1.36921	1.18087	0.812334
1.21013		1.41216		1.1995	1.17946	1.52243	1.25953	1.36388	0.989209
1.14813		1.64964		1.02273	1.1671	1.51382	1.16026	0.976887	0.903027
1.08738		1.55148		0.965387	1.18241	1.47089	0.846413	1.11641	1.24613
1.12848		1.57501		1.19927	0.968423	1.42975	0.756992	1.15266	0.961712
1.17572		1.69531		1.36823	0.917295	1.53725	0.906059	1.21837	1.37542
1.17843		1.71318		1.31906	0.97368	1.64368	0.710323	0.931954	1.32919
1.25436		1.65181		0.953999	1.02385	1.62258	0.71864	0.93312	1.26737
1.30201		1.68849		1.12959	0.865704	1.46296		0.926622	1.25875
1.21677		1.60154		0.989383	0.939776	1.48901		0.937148	1.34087
1.27081		1.48885		0.91186	0.933993	1.53953		1.02762	0.953515
1.21964		2.19153		0.882406	0.913223	1.58911		1.06675	1.39302
1.19796		1.74138		0.996199	0.744743	1.51696		1.07385	1.38438
1.26786		1.57795		1.21531	1.62674	1.27557		0.982855	1.14072
1.11073		0.899531		1.24194	0.973074	1.47291		0.925391	1.27257
1.22119		2.20009		1.14782	0.899287	1.49223		0.85311	1.41361
1.22242				1.27772	0.963254	1.36662		1.09136	1.42392
1.11021				0.900073	0.870984	1.30879		1.19746	1.47206
1.30714				1.00587	1.07957	1.41784		0.980049	1.38477
1.32052				1.0943	1.09973	1.46261		1.06089	1.42822
1.34086				0.931492	1.18765	1.5009		1.09212	1.41351
1.28678				1.23768	1.22658	1.33422		1.11669	1.59382
1.04537				1.0231	0.934191	1.375		0.890806	1.46457
1.23867				1.0848	1.02172	1.26039		1.01911	1.44573
1.3295				1.15251	1.41001	1.77275		0.884697	1.35237
1.26897				1.1989	0.974013	1.13531		1.0509	1.39198
0.981592				1.10188	0.942164	1.29078		1.10411	1.49247
1.13097				1.09003	1.35469	1.12232		1.10381	1.28344
1.13193				1.16569	1.07626	1.29289		1.05564	1.31388
1.03011				1.15649	1.26164	1.18066		1.25149	1.4919
1.04065				0.955694	1.14172	1.27677		1.18222	1.4056
1.01744				1.44948	1.12008	1.20972		0.991872	1.63016
0.885809				1.13065	1.28651	1.39024		0.944181	1.42559
1.10473				1.33025	1.32935	1.31821		1.02921	1.4247
1.29296				1.16574	1.40151	1.56393		1.44743	1.62787
1.23855				1.33728	1.3882	1.70392		1.45794	1.76946
1.26543				1.476	1.20397	1.50046		1.45503
1.22549				1.17871	1.22614	1.47531		1.48576
1.40899				1.1686	1.29168	1.41945		1.49258
1.32347				1.37897	1.19727	1.6031		1.46357
1.35237				0.984423	1.23208	1.90178		1.55043
1.21206				1.08875	1.62563	1.57127		0.778233
1.21857				1.25637	1.57102	1.34553		0.880858
1.15869				1.03325	1.51498	1.49613		0.885476
1.18281				1.33933	1.49276	1.53664
1.21941				1.44815	1.30865	1.45221
1.1389				1.3812	1.40775	1.45647
1.13194				1.35735	1.57595	1.46183
1.16967				1.45333	1.33487	1.53594
1.18941				1.39476	1.45139	1.18783
1.2297				1.30089	1.18034	1.26542
1.47089				1.30655	1.2109	1.08368
1.2605				1.27803	1.40328	1.1826
1.23114				1.36385	1.21499	1.22686
1.21621				1.27949	1.24077	1.1724
1.40327				1.47559	1.48398	1.03003
1.54559				1.45762	1.53894	1.57492
1.41351				1.58993	1.50543	0.948926
1.35227				1.19234	1.61774	1.20501
1.44126				1.38692	1.46664	1.26554
1.36561				1.32462	1.32963	1.74712
1.40812				1.42471	1.40265	1.31759
1.19811				1.2655	1.65218	1.7429
1.05413				1.44989	1.50369	1.64642
0.988929				1.40144	1.40933	1.7065
1.08144				1.48186	1.21981	1.6132
1.122				1.25176	1.30269	1.6397
1.18388				1.38508	0.900514	1.68405
1.29287				1.31022	0.983595	1.83514
1.30532				1.20192	0.963651	1.67171
1.19519				1.24886	1.0899	2.0698
1.20643				1.31035	1.17707	2.19324
1.21082				1.41997	1.27504	1.72703
1.24899				1.3679	1.20213	2.34946
1.41092				1.38888	1.76113	1.74754
1.20302				1.22996	1.44386	2.13378
1.28841				1.3166	1.53185	1.6513
1.21222				1.06729	1.65605	1.61268
1.14567				1.22296	1.02093	1.54559
1.19646				1.49119	0.908716	1.72876
1.19932				1.40841	0.921949	1.65744
1.25579				1.29612	0.969867	1.56357
1.38339				1.44289	0.998127	1.80208
1.43183				1.41671	1.1409	1.42014
1.19461				1.18613	1.04711	1.70814
1.13786				1.27301	0.983422	1.75376
1.39978				1.357	1.15835	1.70344
1.37383				1.39287	1.28946	1.94498
1.37466				1.5879	1.6241	1.65316
1.14791				1.38524	1.47487	1.60177
1.15276				1.42567	1.38647	1.63177
1.09797				1.47286	1.57166	1.76399
1.06781				1.24843	1.70166	1.83938
1.25103				1.42406	1.31161	1.54984
1.33664				1.45271	1.86687	1.7615
1.23551				1.47267	1.34547	2.03529
1.16792				1.34094	1.87107	1.80093
1.19039				1.50513	0.72466	1.93409
1.2209				1.46915	1.82943	1.54648
1.25262				0.751726	1.50694	1.82777
1.20484				1.45355	1.48217	1.84208
1.083				1.33756	1.30636	1.75789
1.2285				1.53956	1.85008	2.07988
1.27847				1.335	0.679462	1.71456
1.17325				1.49652	1.47698	1.63975
1.30964				1.44729	1.62051	1.76548
1.30232				1.50819	1.41463	1.64679
1.2288				1.55217	1.52356	1.66811
1.35937				1.55708	1.80274	1.93619
1.19991				1.62548	1.79934	1.98902
1.18883				1.55398	1.86344	1.54475
1.23408				1.43057	1.44534	2.06824
1.27851				1.35591	1.61247	1.82795
1.22293				1.58892	1.54916	1.594
1.22564				1.39845	1.89731	1.68557
1.31658				1.49283	1.28746	1.50999
1.17679				1.60406	1.33713	1.62009
1.17959				1.51108	1.43451	2.12421
1.27866				1.54079	1.15407	1.51902
1.10408				1.2936	1.36318	1.77478
1.03355				1.37507	1.78118	1.82085
1.10637				1.37569	1.6534	2.39108
1.2389				1.33913	2.05632	1.86357
1.20631				1.49876	1.69956	0.872877
1.44614				1.24076	1.40505	2.0714
1.1733				1.58705	1.53622	1.6094
1.41176				1.64973	1.51014	1.37193
1.29734				1.46059	1.64626	1.63959
1.31389				1.39739	1.63131	2.00605
1.28917				1.51079	1.642	1.88554
1.19036				1.53839	1.54636	2.05775
1.2175				1.64802	1.6004	1.80218
1.26501				1.6567	1.66875	1.71584
1.20259				1.40828	1.41146	2.28557
1.32827				1.73608	1.35538	1.88432
1.37938				1.60665	1.53659	1.79137
1.29992				1.63386	1.47191	1.77652
1.25703				1.69911	1.35083	2.09166
1.2998				1.05951	1.46207	2.1619
1.19298				1.80073	1.49491	1.92202
1.15418					1.59294	1.94773
1.32514					1.82832	1.97324
1.37458					1.63364	2.4088
1.32428					1.42036	2.37839
1.38196					1.74178	1.78442
1.42611					1.70123	1.41657
1.33653					1.52613	1.3186
1.28607					1.7323	1.73181
1.40712					1.57396	2.34243
1.23514					1.45206	1.86719
1.35413					1.38313	1.90293
1.24058					1.73493	2.15477
1.28964					1.89597	2.00489
1.5518					1.72678	2.27795
1.4525					2.18743	2.17968
1.38621					1.50832	1.21377
1.40122					1.50846	1.73589
1.41832					1.62612	1.44872
1.30842					1.49583	2.1115
1.29076					1.67483	2.0605
1.34695					1.52981	2.17146
1.36291					1.58687	2.45791
1.34473					1.97707	2.32424
1.3202					1.85895	1.84786
1.34267					1.80937	2.42711
1.35337					1.63448	1.97784
1.40532					1.92817	2.23692
1.30997					1.63735	1.80735
1.42705					1.58099	2.62503
1.42328					1.57064
1.39545					1.68578
1.39228					1.66268
1.35939					2.36439
1.33737					1.77748
1.40215					1.6975
1.428					1.62518
1.38264					1.74447
1.35777					1.62667
1.41943					1.86942
1.35235					2.07819
1.28505					1.77747
1.32436					1.55769
1.27821					1.52819
1.25251					1.5977
1.35371					1.65895
1.29662					1.66342
1.38213					1.60602
1.34822					1.72534
1.449					2.13731
1.29748					1.30788
1.35992					2.18561
1.42834					1.53461
1.45868					1.30339
1.42575					1.92527
1.38725					1.62772
1.3588					1.55337
1.42534					1.78361
1.37926					1.594
1.45236					1.92984
1.33113					2.19916
1.38321					1.82765
1.25198					1.49649
1.20665					1.70371
1.11882					1.91499
1.1163					1.39575
1.27273					1.81988
1.19243					1.58722
1.14993					1.75477
1.26788					1.76648
1.23023					2.16664
1.33037					1.80243
1.2403					1.52917
1.14599					2.06177
1.27095					1.71829
1.31519					1.86855
1.46233					1.66663
1.27967					1.85948
1.18266					1.64184
1.09293					1.66901
1.16835					1.98921
1.21386					1.83066
1.48641					1.83077
1.43036					1.57266
1.48277					1.89398
1.3148					1.63927
1.40143					1.73411
1.56977					0.851551
1.49864					1.57996
1.30418					1.51648
1.30767					1.60713
1.25857					1.8214
0.982263					1.72686
1.0583					1.50549
1.23812					1.84228
1.2794					1.86708
1.34168					1.74478
1.30102					1.92064
1.3263					1.87992
1.6092					1.68419
1.60227					1.74106
1.49497					1.78256
1.61912					1.89097
1.57726					2.18812
1.49726					1.9184
1.49139					1.63565
1.47418					2.21143
1.52409					1.73675
1.56233					1.90024
1.50605					2.17791
1.45316					2.23021
1.47086					2.27912
1.61133					1.80918
1.64799					1.94725
1.52934					1.52162
1.64226					2.11948
1.56665					1.83576
1.54142					1.90228
1.46805					2.0892
1.52703					2.04635
1.49143					2.60565
1.53956					1.84185
1.47588					1.76557
1.50431					2.03502
1.49959					2.29146
1.39554					2.14881
1.20734					1.95609
0.8599					2.29941
1.29875					2.28919
1.13746					2.27828
0.924681					2.22372
1.37953					2.08854
1.30517
1.41004
1.33057
1.39125
1.41828
1.35359
1.30332
1.32945
1.39912
1.43239
1.33847
1.30532
1.32816
1.32015
1.32489
1.32482
1.49509
1.49566
1.45256
1.01035
1.13846
1.19676
1.02954
1.01823
1.10045
1.00846
1.21887
1.25294
1.32638
1.37744
1.01803
1.13451
0.94764
1.19355
1.09762
1.3532
1.55384
1.38274
1.43389
0.932816
1.63693
1.44361
1.26714
1.5489
1.50815
1.2449
1.42723
1.10863
1.38016
1.20951
1.32384
1.33006
0.94027
1.26408
1.28348
1.44475
1.11518
1.35669
1.28478
1.30302
1.38774
1.4121
1.47192
1.42323
1.51049
1.56395
1.21642
1.53128
1.13967
0.876845
1.46162
1.45982
1.48058
1.37445
1.22748
1.2681
1.52665
1.43175
1.47129
1.51754
1.45085
1.54374
1.29147
1.30183
1.11989
1.16483
1.1119
1.14124
1.09641
1.16694
1.21259
1.26032
1.22649
1.07266
1.54113
1.35747
1.03348
1.109
1.00978
0.952956
1.22874
1.03903
0.866293
1.0291
1.26145
1.33272
1.1451
0.937964
1.30293
1.14242
1.14389
1.33899
1.64804
1.50069
1.33657
1.31546
1.25318
1.44721
1.37343
1.48653
1.37353
1.46909
1.45261
1.20513
1.51295
1.41825
1.30307
1.47569
1.13381
1.25287
1.4055
1.44788
1.4343
1.21543
1.55297
1.43777
1.50191
1.46388
1.50369
1.32134
1.3514
1.38099
1.16758
1.08089
1.18726
1.55407
1.50125
1.50804
1.42006
1.37845
1.41442
1.50787
1.48042
1.531
1.4741
1.42257
1.36476
1.32648
1.32851
1.37421
1.26405
1.35926
1.28947
1.24148
1.5363
1.09312
1.25062
1.10291
1.36304
1.09158
1.01218
1.14147
1.0643
1.04651
1.10895
1.32033
1.66642
1.72856
1.53188
1.48324
1.54188
1.68112
1.08157
1.78858
1.73204
1.75238
1.62124
1.72668
1.63931
1.3295
1.70344
1.65822
1.13577
1.04716
1.01995
0.837095
1.06171
0.901894
0.983793
1.15474
0.708453
0.736608
1.52107
1.44706
1.56245
1.52592
1.4839
1.53571
1.56694
1.65009
1.65094
1.41813
1.59267
1.63727
1.57109
1.70875
1.90531
1.29523
1.35057
1.57669
1.68304
1.50382
1.67705
1.66771
1.58376
1.21501
1.76551
1.70618
1.65466
1.76257
1.73441
1.05244
1.89236
1.17501
1.70145
1.06766

## Sheet: fig8-supp3B
g-m	g-t	g-d	ab-p	ab-s	ab-m	ab-c	a'b'-ap1	a'b'-ap2	a'b'-m
1.24735	1.12999	1.0142	0	1.97684	0.269249	0	0.289284	1.61869	1.96691
1.16475	1.06902	1.06435	0	1.59751	0.379753	0	0.335563	1.19277	2.36517
1.15407	1.32183	1.08348	0	1.95633	0.906557	0	0.385364	1.57215	1.37539
1.09815	1.33695	1.27728	0	1.13278	0.382864	0	0.326657	1.54109	2.40316
1.11836	1.42563	1.33788	0	1.61538	0.397935	0	0.384543	2.61877	2.00028
1.16724	1.0322	1.20282	0	1.39084	0.648841	0	0.125092	2.42924	1.4503
1.17214	0.966462	1.06743	1.12807	1.62154	1.84222	0	0.465937	1.1999	2.34567
1.1294	0.788539	1.49903	0.752382	2.04261	2.7361	0	0.403939	2.66902	2.29166
1.12416		1.62398	0.448151	0.601642	1.8763	0	0.381302	1.5386	2.03132
1.23123		1.25405	0.439159	0.426427	1.70098	0	0.438013	3.06634	3.27563
1.05751		1.08516	0.293659	0.484849	1.62252	0	0.650819	5.4091	1.9875
1.12124		0.881329	0.28684	0.42017	2.4563	0	0.681287	1.42488	2.49934
1.07498		1.03413	0.282652	0.417946	1.54912	0	0.429062	1.51431	2.08427
1.17235		0.870825	0.373303	1.40903	2.10693	0	0.321513	1.52264	2.00713
1.15726		1.62571	0.291638	1.4557	2.24087	0	0.510417	1.53612	2.19565
1.0996		1.09391	0.295174	8.59072	1.9194	0	0.533628	1.47779	2.05733
1.11086		1.0593	0.391066	1.68076	2.81095	0	0.450218	1.69652	1.11494
1.1514		0.920757	0.906436	0.839193	1.0587	0	0.701574	1.42599	1.00048
1.22618		1.0658	0.542808	1.11424	2.36603	0.614146	0.720896	1.68774	1.3209
1.13496		1.13437	0.649057	1.03027	2.80938	0.753806	0.818278	1.5374	1.29425
1.07862		1.14273	0.702982	1.00427	2.83836	0.634055	0.447249	1.35863	1.69434
1.11065		1.49926	0.699764	0.584212	2.94331	0.583494	1.06975	1.27984	1.2985
1.32139		1.58556	0.544515	0.517411	3.07661	0.570372	0.759926	0.453346	1.03013
1.19014		1.20231	0.81752	0.521966	2.1318	0.144295	1.27099	1.65028	1.51248
1.14		1.33091	0.799403	0.61607	1.89224	0.232779	0.61892	1.58599	0.774114
1.12796		1.296	0.837569	0.670169	1.9685	0.123989	0.872995	1.02898	0.463595
1.23397		1.59707	0.736242	0.657082	2.21795	0.610787	1.12192	1.39594	1.09399
1.24795		1.74457	0.554909	0.82191	2.99917	2.05184	0.827709	1.42119	0.989542
1.19858		1.62754	0.520078	0.545293	2.80609	0.862355	0.722274	1.53543	0.891696
1.17134		1.40021	0.979442	0.594741	2.41043	0.616736	0.72282	0.835177	0.777628
1.27855		1.43515	1.19584	0.665711	1.06271	0.228817	1.00644	0.979225	0.9728
1.25706		1.73127	1.05983	0.668706	2.25284	0.646615	0.91317	0.899268	1.17246
1.2026		1.36131	1.08707	2.98216	1.02997	0.564621	0.954001	0.684689	1.74265
1.13919		1.32385	0.88248	0.957178	0.74113	4.16033	1.62199	0.832834	1.43095
1.25313		1.44995	1.08423	0.72345	1.39222	3.94405	0.718437	0.952751	1.17644
1.27811		1.18612	1.02758	0.898163	1.16925	2.91095	0.538252	1.03996	1.67813
1.18964		1.23707	0.995373	0.931752	0.658538	2.6695	0.858769	1.30023	1.60419
1.17666		1.38127	0.928186	0.931463	1.35843	2.24021	1.41838	1.2633	1.56799
1.2449		0.695869	1.28395	0.934536	1.22872	1.35285	0.926892	1.41425	2.43888
1.08632		0.434982	1.41151	0.922721	1.16627	0.710542	0.21168	0.923308	1.3894
1.17815		0.487017	1.26417	1.01231	1.4324	0.695397	1.01156	0.946654	1.25086
1.31523		0.585709	1.42065	1.08644	1.44609	2.72481	0.361921	0.983381	1.00656
1.25287		0.545101	1.32255	0.98292	1.34128	0.991866	0.0636212	1.03185	1.12242
1.37689		0.696104	1.4638	1.03664	1.50317	1.46111	1.79659	1.33056	1.09135
1.22809		0.788988	1.59734	0.92788	1.27791	1.54728	1.3775	1.30232	1.18782
1.44772		0.973501	1.59341	1.18566	1.23324	2.544	1.44354	1.3429	0.489105
1.12655		1.2644	2.14835	0.976148	0.946885	2.02825	1.46135	1.2325	0.886646
1.1555		0.837375	1.60609	0.993465	1.08527	1.15966	1.40242	1.34455	1.02985
1.18947		0.944593	1.6536	0.79896	1.15825	0.99068	1.10765	1.15005	0.666745
1.13072		0.902274	2.09112	0.802943	1.30382	1.3695	1.5155	1.22984	0.779133
1.2491		0.835586	2.07152	1.1386	2.52415	1.61756	1.78007	1.27075	1.13659
1.20532		1.08943	2.23966	0.705723	1.79026	1.03568	1.6941	1.31251	1.07398
1.24063		0.646293	2.42667	0.680339	2.18758	1.62467	1.69207	1.35005	1.2306
1.28561		0.873192	2.55554	0.920506	1.32894	2.10731	0.841287	1.84344	1.2452
1.29127		0.658327	2.76006	0.853628	1.64714	1.46876	1.04102	1.56668	1.89756
1.24708		1.46662	2.74671	0.764865	2.55734	2.84258	2.06533	1.9081	1.67793
1.25526		1.42344	3.02712	0.733696	2.79398	0.543342	0.829281	1.49265	1.10478
1.23051		0.930454	2.96152	1.12393	2.22479	3.03486	1.64709	1.43818	3.16144
1.28504		1.25017	5.84353	0.973558	1.84442	2.60143	2.7908	1.63995	1.24348
1.25107		1.26718	6.70041	0.981125	3.31419	1.09451	1.31444	1.47955	1.69726
1.27757		1.16152		0.950504	2.20995	0.731456	2.85167	1.62335	1.42735
1.23896		1.13477		1.72868	1.85799	0.291167	2.74942	1.36241	1.69047
1.31775		1.1265		0.88416	1.32842	1.68556	1.15362	1.35092	1.28345
1.33294		1.5935		0.704321	1.29989	1.20937	0.867118	1.51584	2.32591
1.34712		1.45226		1.09182	1.22367	1.06587	0.649677	1.40857	1.16231
1.33522		1.87862		1.04319	1.03278	1.33098	2.03136	0.973641	1.70241
1.25973		1.83027		0.731317	1.68969	3.96539	1.85469	0.907803	1.51104
1.28148		1.74618		0.987605	1.26632	2.81656	1.65734	1.02974	1.62246
1.27292		1.74443		0.984137	0.799911	1.33879	4.90463	1.08145	1.50776
1.23668		1.57111		0.741576	0.966947	1.29097	1.07098	0.870104	1.86889
1.35092		0.331154		0.826623	1.27783	1.4756	1.68005	1.0325	1.22548
1.33902		0.574186		1.28444	1.13691	1.5754	2.31628	0.614981	1.45635
1.40328		0.63771		1.11026	1.28124	1.48777	0.971823	1.05193	1.84465
1.3617		0.874538		1.63858	1.14392	1.72629	1.87583	0.591634	1.63922
1.36668		0.571622		1.80208	1.58269	1.61246	2.24869	0.809477	1.95969
1.39685		0.790253		1.1184	1.21947	1.4339	2.0638	1.21245	1.41548
1.32951		1.87801		1.37696	1.40948	1.4181	2.09326	0.834798	1.10085
1.34064		1.18162		1.23481	2.50624	1.54523	2.72034	1.24332	1.36879
1.34095		1.25229		3.05564	1.73801	1.76587	2.20873	1.26642	1.13059
1.36659		1.3758		1.03692	1.48258	1.59478	2.64537	1.50317	1.74685
1.26536		1.21882		1.35316	1.37588	1.68086	2.3984	1.92074	1.87206
1.39077		1.56357		1.45274	3.87318	1.8354	1.93775	1.612	1.27381
1.3889		2.07703		1.18484	3.23335	1.29818	1.61643	0.604884	1.77298
1.37886		2.42171		1.13763	2.39659	1.34802	3.25892	0.632249	2.36422
1.28461		1.76136		0.993973	2.25862	1.24549	3.21152	1.24139	1.93959
1.15545		2.16083		1.06218	1.51949	1.5382	3.09113	0.679445	1.12734
1.09586		1.57441		1.14106	2.63583	1.55235	3.03578	0.502391	1.41803
1.2063		1.62596		1.08543	2.99834	2.17379	3.44631	0.509978	1.26806
1.17973		1.39168		1.18713	1.93219	1.60614	3.45552	0.744866	2.20964
1.1209		1.68226		1.11602	5.58634	1.75088	1.66404	1.30219	2.09405
1.19931		1.67536		1.07307	1.49023	1.55431	1.90249	3.02679	1.54131
1.2771		2.20751		1.43854	2.81197	1.88585		1.60349	1.76361
1.20938		1.63322		1.38979	2.41568	1.00266		1.84466	1.44696
1.21428		1.83286		1.27598	1.99493	1.09185		1.37832	2.44654
1.21573		2.26893		1.47518	2.69667	1.00771		0.765558	1.93138
1.26821		1.95076		1.31152	2.20442	1.14163		0.728311	4.06367
1.23541		1.92483		1.39299	1.95772	1.12786		1.56393	1.57586
1.27257		2.37194		1.28487	1.9571	1.13047		1.59971	1.758
1.24657		4.73715		1.26531	2.11389	1.10971		1.43905	1.75922
1.2354				1.16994	2.17507	1.0399		1.5589	1.59774
1.27127				1.3735	1.79669	0.954141		0.731204	1.89857
1.27322				1.13019	1.44771	1.49967		1.64154	1.64399
1.18467				1.32135	2.31526	1.15737		1.59516	1.76609
1.07101				1.3492	1.11059	1.52032		1.44297	2.09741
1.14971				1.39948	1.44786	1.32306		2.80718	1.72038
1.35809				1.38783	1.28108	1.68529		1.80269	2.20707
1.38842				1.35406	1.4171	1.64852		1.77625	2.22353
1.48751				1.15354	1.51179	1.57234		1.89088	2.64131
1.31907				1.60502	1.69214	1.61637		1.94422	2.30545
1.22984				1.47469	1.17521	1.86851		1.71337	2.50175
1.22492				1.16611	1.18901	1.97985		2.12841	2.26439
1.26116				1.48357	1.00308	1.65557		1.80573	2.36036
1.27171				1.45183	1.16539	1.82409		1.76499	3.79227
1.379				1.49824	1.07195	1.67433		1.66803	2.45105
1.42325				1.54403	1.00858	1.45876		1.83933	2.45625
1.43331				1.49765	1.6919	1.47254		2.11818	3.94343
1.33703				1.37045	1.96093	1.53122		1.9907	3.18254
1.21275				1.59663	1.49602	1.67918		2.29508	3.28392
1.3391				1.45676	1.2054	1.60648		1.73266	3.87636
1.21616				1.67724	1.29203	1.60111		2.07688
1.2118				1.59394	1.07833	2.54236		1.97758
1.17101				1.65439	2.00891	1.16587		2.15263
1.3377				1.399	1.46649	1.30049		1.89593
1.35197				1.54303	1.77471	1.78718		3.22336
1.29096				1.49179	2.05338	1.49533		4.44174
1.39867				1.64867	1.86158	1.18842		3.78217
1.36083				1.53919	1.30151	1.32691		2.42546
1.40498				1.18669	0.783382	1.38013
1.49134				1.59278	0.831603	1.22766
1.46907				1.61776	0.899006	1.32859
1.11178				1.08388	1.18324	1.43808
1.56816				1.21222	0.629183	1.7912
1.25317				1.52034	0.603874	1.84795
1.32091				1.59392	0.993004	2.08148
1.31075				1.16077	2.14881	2.24706
1.35663				1.13244	1.83705	2.17406
1.28451				1.27209	1.71517	2.02017
1.28379				1.50151	1.869	2.22202
1.30822				1.57447	1.63937	2.10084
1.33281				1.2028	1.76118	1.97791
1.29309				1.54518	2.76866	2.68769
1.33916				1.55828	1.16741	1.64797
1.57608				1.43058	2.68518	1.209
1.44593				1.96774	1.58024	1.09061
1.35822				1.77589	1.35123	1.11644
1.24446				1.64025	2.14874	2.33215
1.14877				1.75263	2.08567	1.63581
1.22506				1.63081	1.75157	1.56395
1.26799				1.82741	1.6656	2.11552
1.43755				1.59887	1.29859	1.923
1.81786				1.21089	1.9054	2.06357
1.25774				1.48537	2.09637	1.49633
0.964444				1.65753	2.18761	1.61405
1.07566				1.50162	1.07037	1.59952
1.04015				1.88464	1.38585	1.13438
1.02695				1.5412	1.0941	1.1924
0.979239				1.87388	5.3266	1.24494
1.16525				1.51074	3.27359	1.37518
1.06871				1.60646	2.95255	1.10035
1.14444				1.14452	2.48574	1.10091
1.14838				2.97359	3.77494	1.23731
1.01617				1.05349	2.55964	1.02801
1.14978				1.05197	2.67663	1.38235
1.08379				1.17049	4.84959	1.99095
1.21851				0.836228	1.88891	1.48646
1.18114				1.24868	0.881831	0.998198
1.16242				1.94151	2.57388	2.70678
1.43902				1.38334	1.79213	1.8277
1.23672				0.959233	1.78792	2.52159
1.14949				1.77114	2.37381	2.78165
1.01389				1.88882	1.03273	1.84639
1.28021				3.22824	1.29497	2.03824
1.0087				3.55618	2.54364	2.36302
1.10969				0.893152	1.83125	2.2877
1.15222				1.58777	2.82084	2.43336
1.0672				2.02456	1.81739	1.92197
1.20486				1.88567	1.64399	1.97799
1.13364				2.04843	2.13155	2.1581
1.14179				1.98058	1.98902	1.94868
1.1382				2.18159	1.87323	2.09395
1.18064				1.68622	1.66958	1.90401
1.19431				1.66425	1.67789	2.04907
1.70918				5.28783	1.87729	1.56186
1.17353				1.68223	1.77389	1.91939
1.0144				1.81064	2.1987	1.82839
1.21493				1.7475	1.97789	2.24927
0.997522				1.8665	2.08891	1.68385
1.07651				1.9032	2.17307	2.06174
1.01716				1.96782	2.6452	1.91297
1.10657				1.85242	3.35263	1.66617
1.05291				1.69791	1.55719	1.94306
1.14839				1.83498	2.16822	1.8146
1.21829				1.72567	1.70893	2.01631
0.933437				1.59368	2.03355	2.54899
1.01225				2.25414	1.68163	1.35358
0.92917				1.15232	1.66574	2.76754
1.00022				1.45803	1.47143	2.78655
1.00238				2.23759	1.58133	3.09332
0.997987				2.40234	1.69048	2.92759
1.0276				2.04215	1.3242	1.80244
0.854885				2.34659	1.38542	1.96221
0.868669				1.6141	2.31384	2.16628
0.893051				1.7833	1.16483	2.1648
0.904437				1.64322	1.31316	2.19581
0.992363				1.42045	1.12021	2.29801
0.899312				1.77161	1.04135	2.43319
0.741656				1.85991	1.16217	2.26846
0.860753				1.96869	1.76568	2.82026
1.14366				1.9431	2.04612	2.04244
0.861231				1.3118	3.29181	2.35939
1.04959				0.523566	1.43835	3.25025
1.03884				0	2.03282	2.48992
1.23527				1.60929	2.03162	2.16786
1.44204				2.42496	2.33603	1.82434
1.27004				2.88241	1.99083	2.71311
1.0433				2.22524	2.10822	6.17256
1.09048				2.12064	2.29439	3.41829
1.36179				2.36027	1.0561	3.08854
1.11825				2.07309	1.04187	2.09822
1.15581				2.55823	1.02526	2.03043
1.22301				2.46087	1.89308	4.15035
1.2268				2.19443	1.69841	2.89422
1.20859				2.37376	1.75509	1.86758
1.0022					1.48784	2.60972
1.27143					1.9316	3.052
1.23941					2.21779	2.68251
1.32821					1.70892	2.85352
0.987174					1.85062	3.02837
1.16296					2.26028	2.75717
1.21473					0.724028	2.4261
0.985746					1.20658	2.54017
0.879787					0.947829	2.80374
1.10306					3.54278	2.7032
1.05808					0.748221	1.92592
0.9725					1.37723	2.51354
1.07771					1.78786	2.27821
1.18495					1.96589	1.95523
1.05007					1.07909	3.06496
0.816087					1.78943	2.64047
0.80555					3.34215	2.71337
0.874246					3.40935	2.78324
0.885115					3.94028	2.96323
0.963992					2.3415	2.52721
1.21271					1.85658	2.78862
1.29783					2.61159	2.9021
1.18544					2.61818	2.97267
1.17369					1.79	2.53593
1.02753					1.59209	2.50475
1.13507					3.66525	4.14879
1.12725					1.22477	3.09589
1.2636					4.58304	3.34992
1.06034					2.44384	2.65513
1.28					3.23754
1.19732					4.00956
0.993108					4.49792
1.20799					3.24937
1.10744					1.96899
0.995803					4.07903
1.09284					3.16788
1.07683					4.99671
0.976929					3.31936
1.02229					3.26014
1.09423					2.93055
1.17911					2.94274
1.02065					3.35042
1.04892					2.92765
1.2066					2.32367
0.953524					3.72544
0.978613					3.09211
1.12727					3.93451
1.0274					4.23379
1.14668					3.06717
1.13392					3.96429
1.12489					4.74816
1.00629					4.50315
1.0463					6.0878
1.11454					3.13315
1.11509					2.84622
1.22534					1.5775
1.24208					1.68442
1.48832					1.63672
1.31154					1.75098
1.24048					1.47464
1.17697					1.98582
1.02099					1.68791
0.977861					1.5167
0.977229					1.86107
0.927745					2.1149
0.940125					2.47342
1.0281					2.51376
1.19725					2.85036
0.926717					2.10713
0.901953					3.18568
1.00133					2.78172
0.921623					1.79059
0.939178					2.43834
0.970892					1.90569
0.900063					2.96563
0.853612					2.93036
0.846903					3.14969
0.827841					4.03231
0.838315					2.60698
0.949189					1.77678
0.906236					2.69613
1.14603					1.66273
1.20702					2.60399
0.866373					2.29259
0.860034					4.31688
0.896257					3.60527
1.58507					3.77249
1.14944					3.69459
1.17904					5.17813
1.10271					3.58704
0.877169					5.56377
0.904466					3.7988
0.92684					3.54832
0.932186					3.7695
0.935497					3.2709
0.899859					2.67769
1.2042					2.79158
1.01763					4.69512
1.01242					1.80054
1.08791					1.87496
1.12091					2.22966
1.32153					2.56303
1.12633					2.95084
1.04111					2.62834
1.36328					2.67485
1.86546					2.79688
1.07941					2.62918
1.27022					1.88706
1.26923					1.73142
0.7365					3.34163
0.830658					2.12493
0.781768					2.27325
1.62757					1.48357
1.3937					3.29531
1.43407					3.20437
1.33534					3.13143
1.41726					2.97188
1.34912					2.18231
1.27076					2.33465
1.35368					6.70278
1.00293					3.17643
1.12118					3.41447
1.30288					3.62433
1.2755					2.6226
1.37601					2.6487
1.50213					3.09779
1.46947					2.4622
1.46988					6.88276
1.5298					2.40927
1.44993					3.75474
1.49533					4.42383
1.52311
1.58693
1.50198
1.44252
1.48096
1.53028
1.48455
1.41718
1.50508
1.56355
1.30129
1.34266
1.38826
1.09516
1.10991
1.02677
0.930155
0.929283
1.83025
1.53239
1.42742
1.46427
1.33447
1.22875
1.08098
1.29758
1.36335
1.46197
1.71137
1.51141
1.48473
1.50682
1.38495
1.45736
1.29167
1.15289
1.05404
0.624994
0.948312
0.748121
1.12096
0.920464
0.910623
1.07894
1.50231
1.14936
0.578373
1.57569
1.66864
1.59969
1.58984
1.5442
1.5684
1.56698
1.58957
1.54823
1.55577
1.59185
1.69028
1.60543
1.68681
1.51052
1.48554
1.49718
1.45301
1.51815
1.47826
1.55763
1.52913
1.43637
1.43829
1.43736
1.41882
1.38809
1.51063
1.57907
1.5025
1.46135
1.73252
1.65579
1.55821
1.16566
1.67215
1.59891
1.54756
1.55681
1.56716
1.61732
1.58861
1.55136
1.6314
1.50136
1.55989
1.549
1.40139
1.41085
1.49474
1.43248
0.97479
1.60021
1.235
1.23689
1.799
1.56566
1.5583
1.44143
1.34243
1.4674
0.863307
0.864753
0.816441
0.759637
0.680503
0.808144
0.680193
0.757776
0.705699
0.736343
0.886126
0.83164
1.01637
0.796438
0.853895
1.00815
1.7137
1.78871
1.72188
1.8431
1.01621
1.2099
1.58632
1.02525
1.32308
2.01609
1.29511
1.19083
1.62523
1.48719
1.5721
1.36128
1.44576
1.44325
1.67158
1.34686
0.999188
0.993733
1.48855
1.3678
1.62841
1.54813
1.53412
1.54953
1.79169
1.57199
1.74026
1.6894
0.914986
1.32419
1.47472
1.38369
1.74538
1.12542
1.34523
1.89375
1.55744
1.62071
1.64062
1.70266
1.76494
1.54524
1.91695
1.45052
1.80106
1.68956
1.71376
1.66052
1.92651
1.60619
1.67316
1.01859
0.774656
1.29443
2.73058
1.78209
1.7404
1.8475
1.85409
1.87864
1.8081
1.91452
1.7761
1.92182
1.85423
1.76123
2.06958
1.92722
1.76755
1.94588
1.0835
0.901071
0.676959
1.89412
1.67648
1.76242
1.75533
1.64934
1.43874
2.62704
2.04092
0.761887
1.26777
1.06952
1.82353
0.572131
0.78449
0.866727
0.637236
1.41506
1.0891
1.83688
0.796017
2.1405
1.64435
0.486118
0.378661
1.70598
1.99979
2.16539
1.78843
0.812278
0.833914
0.699316
0.697799
1.97934
2.06671
2.22981

## Sheet: fig8-supp3C #KC-APLsyn per KC
g-m			g-t			g-d			ab-p			ab-s			ab-m			ab-c			a'b'-ap1			a'b'-ap2			a'b'-m
calyx	peduncle	lobes	calyx	peduncle	lobes	calyx	peduncle	lobes	calyx	peduncle	lobes	calyx	peduncle	lobes	calyx	peduncle	lobes	calyx	peduncle	lobes	calyx	peduncle	lobes	calyx	peduncle	lobes	calyx	peduncle	lobes
14	13	43	9	7	32	12	5	26	7	16	40	8	5	28	6	6	19	11	2	39	2	0	68	3	2	33	4	3	51
16	17	45	8	4	28	10	9	30	0	18	34	6	8	26	8	4	18	18	3	32	4	0	61	4	1	31	6	12	52
18	12	29	9	15	32	6	7	35	0	16	40	7	8	28	15	4	17	11	8	36	4	3	56	6	3	43	6	8	68
19	13	32	11	7	33	13	6	18	7	6	45	4	10	29	0	6	31	17	3	31	1	2	58	10	5	37	6	10	38
16	5	55	6	9	24	7	9	32	11	7	33	10	8	25	10	5	17	10	9	25	4	4	69	6	4	47	7	10	48
19	0	40	13	12	29	6	6	43	5	23	39	10	3	19	7	11	23	11	6	29	4	0	48	5	5	53	12	15	47
18	6	45	10	10	35	7	4	42	3	17	37	6	10	23	7	4	20	0	5	36	3	0	71	9	1	44	3	5	31
15	10	37	11	8	29	10	5	50	4	21	29	6	10	25	9	4	25	4	5	35	7	3	47	3	4	36	6	9	56
12	15	42				1	11	62	4	18	27	4	3	28	9	7	23	5	7	36	1	0	59	9	1	48	6	11	59
12	14	34				10	5	31	10	13	43	6	9	23	11	3	25	10	3	42	4	2	65	6	6	55	7	8	40
18	4	37				10	9	23	3	19	28	7	9	31	5	4	21	15	5	52	2	2	73	5	5	53	7	6	47
15	5	45				10	8	28	0	18	31	11	7	37	8	3	19	21	0	32	4	0	59	3	1	40	6	5	48
12	5	44				12	6	41	2	14	39	7	4	23	11	4	27	13	12	32	5	2	64	3	3	36	4	7	35
17	11	46				8	5	31	6	14	51	6	8	25	8	5	15	19	4	36	1	3	65	5	4	53	7	3	43
14	7	35				6	4	34	3	13	44	8	12	27	5	3	24	15	15	25	2	3	64	6	4	55	5	6	51
13	8	57				6	9	37	7	19	39	8	7	36	7	2	23	20	10	32	6	0	59	5	3	38	2	8	43
18	6	46				6	6	22	3	15	45	8	6	28	16	7	36	9	8	23	4	0	67	5	7	30	3	9	64
16	10	40				7	7	26	2	16	37	3	1	34	6	2	19	12	8	27	2	0	60	4	2	49	6	6	53
19	5	47				9	12	31	1	19	40	8	8	26	8	1	19	13	2	38	2	0	60	5	4	48	4	7	61
15	10	41				8	5	40	4	19	26	4	12	35	6	4	27	12	11	25	2	4	67	3	3	40	3	5	55
18	11	33				9	1	41	0	13	41	7	5	27	12	5	24	16	8	33	6	8	39	2	10	41	8	14	41
21	10	43				6	6	51	5	11	33	8	10	24	11	5	35	14	6	36	5	1	49	4	3	46	3	2	48
17	10	62				4	5	37	1	10	41	9	6	25	6	0	18	15	7	36	2	3	74	4	2	41	6	6	39
17	7	48				9	6	22	3	16	29	5	6	30	12	2	23	17	3	29	2	0	60	11	3	41	3	5	52
17	12	47				11	5	35	5	21	29	9	5	36	15	7	27	11	4	50	3	0	64	1	0	41	5	6	50
15	4	53				4	11	29	1	11	24	8	5	22	19	4	32	0	3	33	0	2	57	4	6	41	2	11	48
18	8	42				9	6	32	4	14	30	6	7	21	6	9	28	6	5	30	4	5	65	3	5	46	4	5	46
17	10	36				10	2	37	2	12	34	9	7	24	2	10	28	10	5	35	4	0	53	5	4	44	7	11	48
12	19	51				5	5	26	1	22	39	8	5	27	13	6	43	15	0	35	1	5	63	5	1	39	3	9	45
17	6	45				7	5	27	5	8	44	5	9	25	5	3	18	0	6	39	0	1	69	2	7	52	4	6	56
15	18	49				9	4	27	1	12	46	10	7	13	14	5	15	2	1	32	2	2	49	5	4	43	6	6	37
19	13	51				5	10	40	10	14	43	7	5	30	10	5	30	21	7	30	4	2	52	7	3	54	6	13	48
15	8	49				10	8	34	2	10	21	6	6	28	17	5	26	5	7	34	0	2	67	5	8	43	6	10	44
14	9	42				8	8	31	2	17	43	7	5	29	14	4	22	10	9	29	5	0	47	8	4	48	10	12	55
11	8	37				13	4	32	2	14	36	10	4	31	7	1	17	7	4	33	3	0	57	7	1	48	1	12	43
13	11	43				10	9	37	0	14	32	2	5	27	20	7	27	16	5	35	5	1	73	9	3	45	5	14	42
14	5	34				9	11	32	7	17	32	3	6	22	6	9	30	17	6	32	2	3	67	5	3	48	5	8	35
6	10	50				7	15	25	6	19	35	6	9	25	6	4	26	28	8	27	4	3	55	3	2	45	3	6	40
13	9	39				6	4	31	2	11	34	5	3	31	3	2	20	19	6	24	2	2	68	6	8	37	6	3	48
13	13	38				11	8	29	2	9	41	9	7	24	7	3	23	19	10	27	2	1	66	9	1	36	4	2	39
16	3	48				9	6	31	3	13	42	5	3	30	11	3	21	21	6	28	0	1	56	6	3	52	5	6	52
13	11	29				11	3	40	2	17	27	6	7	21	3	6	21	15	8	33	1	1	66	5	5	51	4	8	57
19	7	52				12	9	34	1	21	40	4	1	34	8	5	19	20	4	29	4	0	56	2	2	53	4	3	50
13	12	27				9	11	21	6	9	42	7	4	24	6	6	28	18	6	37	2	0	66	7	4	51	3	1	52
13	9	32				7	5	42	0	20	36	9	2	19	14	6	23	16	5	28	1	0	52	5	5	51	5	9	59
13	10	37				9	5	34	6	10	39	6	4	31	4	0	15	15	8	32	4	4	57	2	4	37	5	9	46
16	9	39				9	7	34	2	11	36	10	7	30	6	3	19	7	2	41	3	1	66	7	3	44	5	7	42
17	9	48				11	4	36	4	14	41	7	11	26	11	2	17	18	4	30	2	3	61	10	3	40	3	8	45
15	8	43				10	4	49	6	16	39	10	4	17	6	5	30	16	3	36	3	1	41	8	1	44	8	13	40
15	4	45				7	3	25	4	12	31	3	5	23	13	3	26	11	3	31	4	1	62	4	1	43	5	11	46
15	12	44				10	1	34	1	17	36	6	3	14	22	2	32	16	0	41	2	1	77	7	2	54	4	6	51
15	12	45				7	1	39	1	10	41	4	1	22	8	4	25	12	7	23	5	2	70	8	3	39	7	11	47
17	14	36				5	11	25	3	9	35	4	8	30	7	5	33	16	2	44	2	2	55	4	3	37	4	8	49
13	11	41				10	6	44	1	17	39	7	9	25	10	6	22	13	5	39	1	0	66	3	0	35	1	4	41
14	10	31				9	7	30	4	16	36	6	4	17	10	2	19	0	6	37	3	0	57	3	7	50	7	15	38
13	7	33				7	2	32	3	17	39	3	3	33	7	4	15	14	3	29	4	0	40	11	4	53	10	8	54
16	8	42				9	7	47	1	13	30	7	5	23	6	3	26	14	3	29	3	1	61	6	2	40	7	8	44
16	13	36				7	6	33	3	16	31	9	4	18	16	7	24	17	4	40	1	2	53	7	2	47	5	8	36
13	8	38				11	5	31	2	6	32	5	7	30	8	4	25	15	0	36	1	2	46	5	4	43	5	11	34
15	10	45				13	5	31	2	20	36	8	8	25	16	10	34	19	2	42	2	2	56	3	0	49	4	6	41
13	7	35				8	4	36				9	11	29	14	4	31	20	6	38	2	2	60	5	2	40	5	8	50
15	10	41				11	4	30				7	13	25	13	3	22	18	5	42	4	2	61	4	3	46	5	5	51
15	8	38				8	8	27				8	3	27	10	7	26	24	8	31	2	0	61	9	1	50	4	5	45
14	6	52				7	4	38				8	12	20	17	5	30	16	5	29	5	3	59	6	0	49	6	10	41
13	10	41				9	9	32				8	7	28	8	5	15	16	5	32	3	1	61	3	1	53	5	2	49
15	5	45				10	5	24				5	5	36	8	5	16	3	5	47	0	2	68	7	0	53	5	7	51
18	6	45				10	4	36				6	6	32	8	7	20	13	5	30	3	1	59	3	6	38	10	6	49
13	10	42				10	2	31				6	3	28	10	5	18	15	2	45	2	0	49	8	0	55	8	7	33
11	15	39				11	5	23				5	7	33	6	3	27	9	0	35	1	1	62	2	5	35	7	9	46
15	8	33				12	1	31				4	8	26	8	3	21	17	9	27	0	2	52	9	3	53	4	6	52
18	16	43				14	7	20				10	5	24	9	2	22	14	0	42	3	1	75	2	3	43	5	8	49
14	12	37				11	6	30				6	2	29	14	3	18	17	2	31	3	2	62	3	3	47	6	3	52
26	6	51				10	5	24				9	3	26	15	5	35	12	1	32	1	1	61	7	4	45	7	6	44
14	12	38				10	11	24				7	9	36	14	5	22	20	7	31	3	3	58	3	4	40	6	13	38
13	6	42				7	6	33				7	7	26	5	3	20	14	8	33	3	0	63	6	2	58	6	9	64
19	9	36				7	3	38				10	5	22	9	3	19	15	10	34	1	2	63	5	6	40	6	8	61
15	9	26				7	6	38				5	10	29	11	4	20	0	3	36	5	0	53	6	5	61	3	4	34
16	7	34				8	3	26				8	10	26	6	6	20	0	9	27	0	2	53	4	2	53	3	8	43
15	4	45				12	2	31				6	8	23	10	8	38	8	8	33	4	4	52	4	3	50	4	6	53
17	11	36				13	5	32				5	5	23	12	4	14	23	5	36	1	0	66	2	3	32	5	10	46
20	8	48				8	6	30				7	6	36	5	4	19	21	4	43	2	3	70	4	3	45	12	9	50
15	4	45				11	5	36				3	3	19	6	7	24	5	5	36	5	0	74	4	5	41	5	7	45
14	12	43				10	8	39				2	6	31	10	8	22	11	9	37	10	1	71	7	1	46	5	4	40
14	5	53				4	5	47				6	4	23	8	6	16	12	5	42	3	2	63	5	4	39	5	6	53
16	16	36				9	2	40				8	9	31	11	1	32	20	2	28	3	1	64	4	3	48	3	7	32
19	14	35				5	4	33				6	6	30	10	6	16	11	13	33	4	0	59	5	2	50	7	11	37
16	10	38				14	6	29				5	4	31	10	5	32	9	6	39	2	0	51	4	7	51	8	2	37
9	14	45				9	13	29				10	12	30	10	7	12	9	4	43	1	1	64	4	1	50	6	6	51
15	13	44				11	3	45				7	12	29	11	1	30	2	2	44	2	1	75	4	2	40	6	9	48
12	6	29				8	5	35				7	6	29	13	4	25	17	8	40	1	0	52	0	2	42	4	4	36
15	7	53				11	3	28				4	12	35	5	3	20	15	4	38	4	0	61	6	5	45	9	2	45
12	9	32				6	3	26				5	4	30	9	7	29	19	3	34				5	3	49	8	11	33
18	9	40				7	4	33				7	8	24	9	4	17	18	6	25				4	4	48	7	2	43
14	8	48				7	3	39				10	9	30	12	1	18	20	7	24				7	2	51	6	7	52
14	14	42				3	9	36				10	6	26	9	8	20	15	7	40				7	2	39	6	1	38
14	8	41				8	10	27				5	4	18	13	2	22	0	8	37				2	4	46	5	5	44
17	13	35				8	5	30				3	8	22	9	5	11	2	3	41				9	2	50	2	4	46
14	8	35				13	4	26				8	8	36	15	6	28	1	3	41				3	2	38	8	11	42
17	7	43				9	5	32				4	10	30	5	3	29	18	6	35				4	1	42	4	10	33
18	10	52										4	6	24	7	4	20	19	5	43				10	0	44	3	5	44
18	6	56										7	4	15	14	7	20	18	7	40				3	3	41	6	9	48
21	15	47										5	5	26	5	6	16	0	1	38				3	4	33	8	8	51
15	9	43										9	10	26	13	3	28	22	8	38				6	2	52	7	7	47
14	5	51										8	8	24	6	1	20	19	4	37				8	3	58	6	4	47
13	6	47										8	10	23	7	4	22	5	6	37				4	6	32	6	8	65
13	5	38										6	9	25	5	8	21	14	4	36				4	4	45	5	8	44
14	5	41										3	6	24	6	2	21	16	3	37				10	3	50	6	5	47
21	12	41										5	6	29	11	1	16	16	5	31				2	3	54	5	5	50
15	5	30										15	6	26	7	4	17	12	5	34				5	6	30	6	10	49
14	7	42										5	7	27	8	0	23	0	0	43				8	3	49	6	10	65
11	6	46										9	5	25	8	6	23	0	5	43				3	3	52	7	9	43
19	20	32										7	6	22	7	5	18	0	1	46				5	2	40	5	7	47
13	10	38										7	12	36	15	4	36	1	4	42				9	5	29	1	6	47
14	12	43										5	4	30	14	6	20	14	5	40				4	5	51	9	11	54
18	12	45										3	10	27	10	2	26	14	7	29				2	2	34	4	4	47
12	10	41										7	9	25	12	2	16	16	7	42				4	6	39	5	16	39
13	10	39										6	3	26	8	7	17	21	6	38				4	1	39	6	3	46
17	6	34										5	6	19	11	7	27	18	10	36				5	3	33	6	8	50
17	9	36										5	5	26	10	2	15	11	6	38				3	4	41	6	6	48
19	10	46										7	2	24	16	0	36	16	5	39				4	5	49
15	8	44										6	9	26	11	4	26	12	9	34				6	3	50
15	12	26										4	8	26	7	4	28	10	12	31				3	4	39
13	7	47										7	6	25	12	6	29	17	7	32				3	4	48
12	8	48										7	8	27	4	11	24	13	4	41				7	3	52
16	14	47										10	3	23	12	4	29	14	8	28				4	2	42
14	9	44										6	7	24	9	3	20	10	6	40				5	4	55
14	8	34										6	2	36	11	0	21	10	5	21				5	3	43
22	11	33										9	1	27	9	6	15	17	1	41
17	10	37										7	7	29	6	6	21	16	12	29
14	9	40										7	5	22	7	3	12	13	6	39
8	10	37										7	4	27	10	7	22	15	4	29
10	9	37										7	5	32	8	7	25	18	5	32
12	12	49										6	8	21	8	11	32	13	6	33
15	8	41										7	5	25	13	4	15	16	4	47
17	9	39										7	4	34	12	9	27	21	6	40
14	9	38										3	4	31	11	5	30	18	5	32
16	12	43										8	6	36	12	8	14	18	9	28
14	9	39										9	11	24	8	1	19	8	12	35
14	6	35										4	13	32	12	11	27	1	3	37
13	7	32										4	4	31	9	10	17	13	4	28
14	8	40										5	3	24	7	6	24	21	6	38
13	8	40										6	10	33	7	4	14	15	8	35
17	8	36										6	4	22	10	5	29	16	6	29
14	8	33										6	7	27	18	5	32	12	6	28
12	9	47										8	3	26	11	3	24	20	4	29
18	15	45										3	3	28	4	6	17	18	5	40
13	12	46										10	7	20	11	1	20	0	3	33
13	10	39										7	6	37	8	5	15	16	3	43
18	9	51										5	3	26	4	5	24	18	5	30
15	5	43										9	5	21	11	4	17	20	4	34
11	7	51										10	8	29	10	3	14	14	5	36
17	10	53										0	5	29	10	5	28	10	10	34
9	8	38										3	7	21	10	9	29	9	6	33
17	13	44										8	5	31	12	6	29	16	8	40
12	7	47										4	9	35	8	7	12	14	10	41
14	9	37										7	5	28	10	1	22	8	6	28
16	11	46										5	9	23	15	5	24	19	7	28
17	10	42										8	0	22	5	5	22	10	3	38
16	7	41										6	6	32	15	9	27	2	6	24
12	14	32										8	4	37	6	8	26	9	8	35
12	4	26										5	7	27	13	6	21	16	10	35
14	9	39										6	5	25	10	8	16	15	4	45
13	9	26										5	8	29	12	1	19	15	7	33
11	4	34										6	12	31	11	3	16	15	9	34
14	9	35										4	11	27	8	7	17	12	5	34
17	10	36										8	3	24	11	3	15	13	6	27
19	6	35										5	6	37	12	5	23	13	6	30
16	8	40										9	7	29	10	5	23	10	6	26
13	6	32										10	5	25	11	10	15	0	0	30
19	10	47										7	11	33	11	5	14	14	5	30
15	10	51										8	6	31	14	6	15	16	7	36
14	9	32										6	10	20	2	4	24	1	12	23
16	10	47										8	6	34	11	7	18	15	8	32
12	16	47										5	6	29	8	6	19	0	2	25
6	13	43										3	9	28	10	4	15	1	3	33
12	14	52										6	3	24	16	5	32	13	7	37
16	4	33										8	7	19	7	5	15	1	8	33
18	10	48										7	6	22	11	6	21	23	1	38
15	9	45										6	4	25	11	6	21	0	9	29
15	8	30										4	7	18	10	7	22	13	6	34
12	13	58										5	5	29	15	4	31	22	4	40
14	9	37										6	6	22	14	5	23	8	7	41
13	7	35										8	2	27	16	7	20	13	15	31
11	8	41										5	5	24	7	2	27	15	5	35
14	6	37										2	7	24	10	3	15	20	3	39
16	12	34										9	9	22	14	6	28	16	3	36
15	6	19										5	2	21	9	6	17	13	5	30
16	4	32										6	6	26	4	10	24	15	4	36
14	5	42										4	8	26	7	8	20	18	5	31
13	5	36										5	11	22	16	4	27	15	12	39
14	8	42										7	9	21	11	5	12	15	0	35
12	1	44										6	7	21	6	7	25	10	8	33
15	10	39										8	8	19	9	7	19	13	3	26
12	8	45										7	7	21	10	7	19	19	5	38
14	4	48										6	3	29	10	2	30	13	3	27
14	7	30										5	3	28	6	3	29	11	8	27
13	10	42										4	7	38	8	4	19	15	9	28
12	7	48										5	5	22	6	4	18	20	0	24
10	12	33										7	2	21	4	5	23	17	6	34
13	14	27										9	5	30	7	2	18	18	4	33
12	10	38										5	5	33	4	6	18	13	9	25
18	11	34										4	6	19	5	7	27	0	1	40
13	8	40										4	4	27	12	7	23	18	5	41
16	11	39										11	9	34	9	10	28	16	4	33
14	5	30										7	7	18	10	5	24	0	0	36
11	11	37										10	7	22	6	3	17	21	5	24
19	10	26										7	9	26	9	6	16	15	7	29
16	3	50										9	5	33	6	4	23	20	3	39
9	9	49										6	10	20	10	4	19	15	6	37
13	4	42										6	9	25	6	4	17	21	5	27
13	6	34										8	3	18	11	6	20	13	3	31
14	7	34										7	6	30	1	11	35	18	7	40
17	11	34										10	7	23	13	8	25	18	6	34
16	5	36										6	7	25	9	7	24	15	4	37
7	11	41										4	7	31	5	6	35	17	3	39
16	8	47										10	4	24	12	2	23	6	4	32
16	7	40										6	5	26	16	0	33	20	10	26
15	5	40										4	4	35	14	1	16	20	6	26
12	6	57										3	7	29	12	5	26	12	5	25
16	9	53										6	7	29	13	5	8	17	8	30
11	0	26										4	7	32	12	8	19	22	5	35
14	8	39										4	7	18	10	3	16	14	5	30
13	3	42										7	7	36	16	0	36	16	4	37
15	6	39													12	7	21	17	0	22
15	9	33													13	7	20	20	4	27
17	3	41													4	3	22	24	4	26
11	5	31													8	5	21	16	0	38
18	3	52													5	6	21	10	6	33
10	5	39													10	1	35	19	4	40
15	10	41													8	5	15	13	7	33
17	5	38													14	5	23	10	7	25
15	2	40													8	4	26	18	13	42
18	7	43													15	4	39	20	8	34
10	6	49													6	10	24	11	6	32
13	6	40													10	3	29	2	0	33
16	7	36													4	4	28	18	5	31
16	20	31													2	8	31	18	3	29
17	7	35													9	1	18	16	2	32
18	13	46													6	3	23	14	4	30
14	7	30													4	1	20	17	6	35
19	12	38													15	7	33	18	6	32
13	7	36													14	5	29	17	5	44
10	10	40													10	5	13	12	8	38
18	10	32													8	2	18	13	6	31
16	15	37													9	4	17	9	3	34
15	6	39													6	6	28	12	8	34
17	7	49													12	5	28	12	3	28
17	7	39													8	4	17	19	4	38
20	16	35													14	4	18	25	8	28
17	14	36													10	1	14	20	3	29
13	4	42													9	6	28	12	9	40
20	7	38													7	5	16	11	6	32
17	4	41													14	7	25
13	7	40													8	6	32
15	7	41													11	2	27
9	8	40													14	1	28
12	9	27													7	12	17
14	8	55													10	0	23
11	9	41													13	2	34
11	9	31													15	6	26
13	6	49													18	6	19
14	13	40													12	2	21
18	8	34													8	3	25
15	6	40													7	3	18
15	5	40													13	6	18
11	12	31													12	0	29
16	6	37													17	1	31
19	3	47													12	3	17
14	6	38													7	5	21
17	4	44													8	4	23
18	14	48													11	1	32
12	9	51													7	3	14
15	7	30													5	4	25
14	5	47													7	3	19
12	8	31													16	8	36
14	9	49													14	5	26
13	7	44													22	1	29
16	8	47													11	5	30
14	3	43													11	7	13
15	8	51													12	2	19
17	9	41													6	2	18
16	11	36													5	1	21
13	12	52													12	4	22
19	6	28													8	3	23
10	9	34													17	7	37
14	8	42													7	13	19
8	17	39													17	7	32
15	5	42													8	4	14
13	8	50													13	7	27
13	14	37													17	7	34
16	11	37													7	7	17
14	10	43													18	11	14
15	13	36													10	3	25
17	10	46													11	6	26
15	6	56													12	7	22
13	6	44													18	0	44
12	4	32													7	3	17
12	4	33													13	0	27
10	11	43													9	4	18
16	10	28													5	2	12
15	6	36													10	8	20
19	10	39													6	1	21
15	10	31													11	5	19
17	7	51													8	3	31
9	4	30													9	7	10
13	1	42													7	5	19
14	8	58													10	2	17
16	14	38													13	1	38
16	16	38													16	4	35
14	7	40													9	3	19
10	12	43													13	1	28
13	5	37													6	3	20
13	7	53													12	6	34
16	12	46													10	3	21
12	8	33													7	4	27
14	4	36													13	8	19
18	4	39													12	3	14
18	8	41													9	5	28
16	6	51													15	0	29
14	7	47													8	2	26
16	2	49													7	4	25
17	8	38													10	5	18
15	3	41													14	4	21
13	5	35													19	6	28
14	6	52													7	2	22
11	8	31													15	2	19
12	13	38													6	11	15
13	10	31													17	1	32
16	8	49													8	9	16
15	8	40													6	5	30
13	7	41													14	5	26
17	6	33													6	8	16
15	5	39													6	3	20
14	10	48													8	3	18
15	6	43													7	3	18
19	3	36													16	4	35
17	10	37													8	2	14
11	3	55													12	4	20
16	7	33													13	4	25
17	6	50													20	3	17
12	12	42													5	6	26
15	5	48													12	6	21
12	7	31													6	6	23
11	10	44													15	3	29
12	3	45													14	3	12
13	5	37													14	7	19
12	7	45													8	10	29
18	11	34													7	4	17
10	8	38													18	4	29
12	1	34													7	1	20
20	5	43													12	7	24
11	11	47													3	6	17
15	8	57													7	5	23
15	4	41													8	4	19
11	12	30
8	4	17
13	8	45
12	5	52
12	5	44
10	7	46
14	7	39
22	10	33
15	2	47
15	3	44
11	6	33
11	3	38
16	13	37
17	4	46
13	6	42
15	7	37
13	7	34
19	3	36
18	10	41
11	6	38
17	7	45
14	8	40
10	8	37
17	11	34
14	6	43
9	9	32
14	9	48
19	7	37
15	15	33
17	11	36
19	13	44
18	6	62
20	4	45
16	5	53
15	8	39
16	8	39
15	6	49
13	18	27
17	11	41
13	9	32
11	8	37
18	11	45
13	3	44
17	12	39
13	13	27
14	13	32
20	9	47
16	4	45
18	7	49
14	8	57
15	5	54
20	18	44
16	5	30
14	9	43
14	16	44
19	10	41
14	9	25
18	8	44
14	9	36
11	6	43
22	18	36
17	9	49
16	5	50
16	10	47
13	14	35
15	6	36
15	4	38
14	5	50
18	3	35
13	8	46
19	7	49
17	6	30
12	10	46
13	9	39
10	9	44
11	9	42
16	11	42
18	6	40
17	6	31
17	13	45
14	7	42
19	12	33
18	9	41
15	4	30
13	5	44
19	10	33
15	7	31
14	7	39
15	11	38
15	7	48
11	4	35
9	3	42
11	9	33
13	10	38
12	12	43
11	5	34
14	8	32
13	8	41
16	6	35
13	8	48
14	9	37
13	7	29
11	3	41
17	12	40
15	2	47
18	5	35
17	7	29
14	5	52
19	3	43
12	6	38
16	14	40
10	12	29
10	9	22
13	2	39
13	14	39
14	13	39
14	11	42
12	0	42
12	8	31
14	5	48
14	10	50
17	8	49
12	10	39
12	15	51
18	15	40
12	7	42
16	9	44
16	8	51
13	18	40
16	5	33
13	7	33
12	8	38
10	11	40
14	7	44
15	13	46
18	9	39
19	7	39
13	4	40
16	9	51
17	12	38
16	8	55
16	13	38
16	7	45
17	13	41
16	8	29
15	10	39
12	14	41
16	9	39
15	6	43
16	8	30
14	2	27
14	4	39
12	9	28
15	11	35
16	3	52
14	9	43
16	12	36
13	9	52
13	7	49
17	5	38
18	3	50
13	7	41
18	10	37
17	13	39
15	8	32
11	8	53
14	10	54
12	10	49
14	8	44
14	12	40
14	6	35
12	7	40
12	14	35
15	10	47
18	11	34
14	3	27
16	12	43
15	11	58
18	9	56
20	11	28
11	9	34
17	13	34
17	15	52
16	6	39
16	10	37
13	8	38
14	2	28
14	5	38
14	6	43
11	11	34
13	10	30
11	6	37
15	8	53
15	9	35
15	11	35
16	6	37
12	9	36
16	8	32
16	3	35
9	4	32
12	6	38
16	14	42
19	5	39
17	6	36
18	7	29
10	6	37
15	9	45
15	6	49
16	9	44
13	6	36
14	7	49
16	8	34
18	13	40
12	7	43
16	5	31
16	6	61
14	2	29
12	7	39
17	13	50
15	5	37
12	10	44
15	9	26
14	4	32
16	6	42
17	5	47
10	13	35
16	6	31
10	5	53
18	6	47
17	4	43
15	2	38
11	16	38
14	6	35
14	9	50
8	7	26
14	10	30

## Sheet: fig8-supp3D #APL-KCsyn per KC
g-m			g-t			g-d			ab-p			ab-s			ab-m			ab-c			a'b'-ap1			a'b'-ap2			a'b'-m
calyx	peduncle	lobes	calyx	peduncle	lobes	calyx	peduncle	lobes	calyx	peduncle	lobes	calyx	peduncle	lobes	calyx	peduncle	lobes	calyx	peduncle	lobes	calyx	peduncle	lobes	calyx	peduncle	lobes	calyx	peduncle	lobes
37	6	41	24	11	33	31	5	29	1	17	23	10	6	24	6	5	22	9	0	10	2	1	54	14	0	41	6	0	45
33	10	32	24	4	24	9	14	28	1	10	23	5	11	24	4	7	27	12	4	14	6	1	46	5	4	52	10	5	44
36	5	46	26	12	38	12	3	32	0	13	27	8	7	28	7	5	19	5	3	13	6	2	47	7	4	46	8	9	52
23	5	36	19	7	34	32	5	22	5	10	25	9	6	31	1	3	20	11	1	14	10	3	50	9	1	42	17	4	52
29	9	40	15	5	23	9	5	27	8	10	34	9	8	28	7	4	18	9	3	10	11	1	54	11	3	55	12	6	48
29	7	47	25	9	31	13	3	22	3	20	27	7	6	30	6	4	22	15	2	10	6	0	45	13	4	31	11	3	43
32	6	41	21	6	33	10	4	35	3	14	35	10	9	35	12	5	23	0	2	14	4	1	48	14	2	46	8	4	29
27	11	41	25	11	31	17	7	34	2	15	26	16	10	35	5	7	20	1	3	4	2	2	38	7	1	46	14	5	49
20	15	34				5	6	46	7	24	32	10	6	33	4	2	23	2	2	6	1	1	51	10	0	46	7	6	61
20	6	35				16	1	23	19	18	39	6	9	26	11	6	19	7	2	12	11	0	53	11	3	44	10	3	46
19	3	37				12	8	21	1	20	27	14	8	35	11	3	30	10	1	7	4	1	51	7	1	52	10	6	46
28	3	34				14	6	13	2	12	28	12	3	39	13	5	23	17	0	10	9	0	60	8	3	49	7	1	37
32	6	30				11	7	20	4	15	30	10	7	33	10	4	15	11	4	5	9	1	47	8	0	41	13	5	59
24	9	33				17	7	28	7	13	41	5	6	24	6	6	27	12	1	10	4	0	48	13	3	47	8	1	45
30	1	30				10	3	36	5	15	38	13	8	21	6	5	31	8	2	12	3	0	64	9	2	48	14	2	58
27	9	41				11	11	27	4	15	31	14	3	35	9	3	22	14	1	10	2	1	44	9	2	42	6	4	40
37	4	39				17	6	20	0	9	35	13	7	32	12	2	19	8	6	11	7	0	49	14	1	52	12	7	41
25	9	32				13	7	27	2	14	34	8	5	29	10	4	17	17	5	12	3	0	48	15	1	53	15	3	48
26	5	41				13	10	22	2	20	28	11	9	34	10	5	20	11	0	13	5	0	43	15	3	45	8	5	42
30	7	38				17	7	26	3	14	37	12	9	32	7	5	21	7	3	10	6	0	58	9	1	49	11	6	47
22	9	33				21	2	32	1	17	32	16	4	28	6	5	13	16	3	7	6	3	38	8	4	46	10	12	45
28	6	46				5	3	35	3	12	38	10	10	26	9	6	17	13	3	11	5	0	54	13	3	39	10	2	49
24	7	45				7	3	33	1	7	27	9	4	39	18	0	19	11	1	5	5	0	55	13	0	53	10	3	39
25	8	46				7	6	25	1	12	31	9	7	30	8	6	18	11	2	9	2	0	54	7	3	46	11	4	35
34	9	40				26	3	29	8	17	27	10	7	40	16	3	16	4	1	6	6	1	55	5	0	46	15	6	46
26	4	45				8	4	19	2	18	21	13	4	33	9	4	16	0	0	10	5	1	44	6	4	42	7	3	48
28	4	44				16	8	26	0	13	38	9	8	35	4	4	12	6	1	13	5	2	46	19	1	54	10	6	42
22	11	35				17	2	36	1	15	30	16	5	25	2	2	16	9	2	7	1	0	39	11	3	43	11	7	48
32	17	37				8	4	21	2	17	28	13	5	27	10	4	17	8	0	13	3	2	51	10	3	50	15	8	47
20	12	34				10	5	27	2	9	27	6	12	33	6	4	18	0	2	5	6	0	46	6	2	41	21	2	43
27	13	44				14	7	22	0	14	33	11	8	37	16	3	19	0	1	12	3	0	44	18	1	46	18	4	44
21	6	51				5	9	34	6	11	37	13	4	38	7	4	18	9	0	15	11	1	44	12	1	43	10	11	36
31	6	47				11	10	21	5	12	26	6	8	27	15	3	16	4	4	4	2	0	49	13	3	49	5	5	27
34	7	39				17	5	28	3	17	35	8	0	28	11	1	16	9	3	14	4	1	32	10	2	47	9	4	44
28	10	41				15	5	25	1	16	30	10	9	31	14	4	24	6	1	7	10	0	38	12	2	39	6	6	42
29	11	37				15	9	24	2	15	25	11	3	41	12	2	14	10	1	8	2	0	53	9	2	40	8	7	32
31	7	38				17	10	33	2	11	17	8	4	28	10	10	27	10	3	12	8	0	56	8	0	45	10	4	54
14	4	54				7	10	31	3	14	40	8	10	22	5	4	18	11	2	7	1	0	39	12	0	50	12	7	47
29	7	34				13	9	19	4	11	30	8	8	29	10	2	35	3	4	11	5	0	59	14	3	49	7	4	49
20	9	35				14	10	29	4	10	21	7	8	32	9	7	27	8	6	16	1	1	45	10	0	49	9	2	40
21	7	46				11	5	26	1	17	21	6	5	31	12	2	21	14	1	12	4	0	46	8	3	51	12	4	51
20	11	37				13	5	31	2	21	38	9	9	31	9	5	28	11	5	16	2	0	44	12	2	50	8	4	52
29	8	42				12	9	34	2	18	33	12	3	30	7	3	27	22	4	10	6	0	49	13	1	46	22	5	46
15	12	33				17	8	25	2	12	42	10	5	34	9	7	18	11	2	13	3	0	53	16	3	38	7	1	46
15	9	36				5	5	25	3	14	27	9	5	29	11	5	23	11	5	8	4	0	40	11	3	47	6	4	44
18	9	30				13	5	22	8	13	24	11	7	29	2	1	13	16	3	9	6	3	62	6	0	45	14	5	49
31	8	34				15	10	23	1	8	34	7	11	26	11	2	21	5	1	10	1	0	53	8	1	47	9	5	37
30	5	34				13	1	29	3	17	27	13	9	31	14	4	16	14	1	10	7	0	52	12	3	41	12	4	59
19	7	47				15	4	36	5	20	29	12	6	21	3	5	21	14	0	9	8	1	44	7	0	38	7	5	41
26	7	37				14	3	28	3	19	36	7	6	22	12	5	21	6	2	7	2	1	49	12	3	49	6	3	43
29	12	44				12	2	29	2	17	33	7	4	21	11	2	17	10	0	9	1	0	49	12	3	57	12	3	37
24	15	40				10	5	24	7	16	38	7	4	27	12	2	18	14	4	11	9	1	50	12	3	41	8	6	35
21	9	32				12	6	26	3	10	34	9	8	26	13	6	21	20	0	11	9	1	44	15	2	57	12	6	42
23	8	40				15	4	30	0	15	35	4	12	32	6	6	19	6	1	13	3	0	57	11	1	46	8	3	47
18	11	28				13	11	22	5	19	26	9	7	37	7	5	23	0	3	12	7	0	55	13	5	50	8	5	40
21	7	37				24	5	32	5	11	33	13	5	29	8	6	22	16	3	11	9	1	48	14	2	49	9	4	37
24	9	30				17	8	36	0	15	21	12	4	31	7	6	25	19	1	11	2	0	53	12	4	43	11	7	41
29	14	33				9	5	30	4	14	27	6	8	23	18	2	10	14	2	11	7	0	40	19	0	55	7	0	40
26	7	41				15	4	43	3	11	32	8	9	28	14	3	22	14	0	14	6	1	36	14	2	45	12	5	39
22	10	36				21	2	31	2	14	28	6	6	27	13	4	13	13	0	12	5	0	49	8	0	49	13	8	50
26	4	36				17	3	36				4	6	24	14	2	9	16	2	10	9	0	44	12	0	42	12	6	52
21	8	33				13	2	27				9	8	24	11	4	22	10	2	10	1	0	52	11	2	56	17	3	41
18	4	28				18	7	33				17	2	29	11	2	25	20	0	12	2	0	50	7	1	46	11	3	42
30	5	43				11	8	34				8	12	28	19	3	17	12	3	14	3	0	32	10	0	52	10	6	35
25	7	52				9	5	25				12	3	31	6	6	21	14	2	6	6	1	63	12	2	53	10	1	43
17	5	35				15	11	19				5	5	37	13	4	20	3	3	12	3	2	56	9	0	47	5	7	52
20	2	39				15	6	25				7	4	30	4	6	22	15	3	11	5	0	64	8	6	47	6	4	47
14	6	37				18	5	26				4	6	27	9	10	29	15	0	9	1	1	50	19	0	52	14	4	37
24	12	41				9	3	27				14	7	36	13	5	24	6	0	11	3	0	65	14	1	41	10	7	52
19	4	30				23	2	38				14	5	28	8	8	24	8	1	9	5	0	44	11	0	53	12	3	59
25	9	31				12	8	21				12	7	36	9	8	21	7	0	8	3	0	64	17	5	47	15	5	46
27	12	37				16	3	22				9	7	34	14	1	16	14	0	11	10	0	56	9	2	53	17	3	45
27	7	39				15	4	26				7	5	29	15	2	15	10	1	11	6	1	46	15	0	52	9	2	54
20	11	34				15	9	22				5	8	30	9	5	20	9	0	10	3	0	61	16	1	50	12	8	47
21	6	39				12	6	29				8	5	33	9	2	23	10	2	9	6	0	47	9	1	49	6	2	51
22	15	33				15	4	28				9	4	26	12	6	22	10	3	10	1	0	56	11	5	41	14	6	47
25	6	28				14	4	27				12	6	27	16	3	27	0	0	8	4	0	50	12	1	56	12	3	44
21	7	49				10	2	27				10	9	21	6	8	25	1	3	8	2	1	46	9	2	51	7	4	54
27	4	41				17	2	29				10	8	32	12	3	15	11	2	14	1	0	48	10	2	49	12	3	49
27	8	33				22	6	29				9	7	21	7	5	17	18	2	6	4	0	49	6	3	39	18	4	43
38	13	36				17	3	17				13	10	23	7	3	26	14	0	9	6	1	47	10	2	53	9	6	45
21	3	39				24	9	24				2	9	31	15	8	30	9	4	13	3	0	45	11	3	48	10	2	44
23	5	40				17	7	25				11	9	39	9	4	20	8	3	14	11	0	54	15	0	42	13	3	45
28	7	48				11	4	44				10	3	27	10	5	21	11	1	12	2	0	50	11	2	49	12	3	45
16	13	44				11	5	36				9	6	30	7	0	21	6	2	11	3	1	43	10	2	46	12	7	40
22	18	34				16	7	24				10	7	29	13	6	18	10	3	11	3	2	49	10	1	57	5	6	38
23	4	30				19	9	18				8	5	23	12	9	28	8	1	4	1	0	35	9	3	45	11	2	51
22	17	39				31	13	43				12	10	32	9	6	22	8	2	10	5	1	47	4	1	51	16	3	45
23	11	26				11	4	28				10	7	28	14	0	19	1	1	10	6	0	43	12	2	39	11	6	42
20	5	27				16	4	31				10	7	32	11	7	28	14	5	9	3	1	38	16	1	52	8	4	36
33	7	43				21	5	28				7	8	27	7	9	23	10	2	11	4	0	49	14	1	46	5	3	39
24	7	29				7	6	26				8	6	33	9	3	19	10	1	14				12	2	46	10	5	48
25	9	29				12	3	28				7	5	27	8	6	26	13	2	7				15	3	47	13	4	43
20	8	41				7	3	33				10	6	30	16	0	18	16	1	9				11	1	61	11	6	51
32	9	30				7	6	33				7	6	29	7	5	32	11	3	14				12	0	44	6	3	45
32	5	44				14	9	18				6	9	32	9	3	22	0	1	8				19	2	47	19	4	50
24	5	26				18	4	28				11	10	31	8	7	17	0	3	10				10	3	45	8	4	36
24	6	34				17	2	23				4	9	26	14	3	19	0	1	10				12	0	41	12	4	50
31	6	35				21	4	31				10	7	29	8	7	26	16	3	12				14	1	50	8	7	50
36	6	46										8	6	17	7	5	27	12	2	9				10	0	41	13	2	51
28	3	39										10	10	30	10	3	19	10	1	11				10	3	46	9	4	38
29	10	35										6	5	31	10	5	24	1	0	9				11	4	34	8	2	46
29	8	35										14	6	30	6	2	12	16	2	11				21	1	58	19	4	42
21	6	41										7	11	29	5	6	24	13	2	8				6	2	64	6	5	48
20	5	25										10	6	38	15	7	22	2	3	6				15	3	45	10	6	47
16	5	37										9	9	34	15	8	29	10	2	12				10	2	50	12	7	49
22	8	31										11	6	25	6	3	13	13	0	17				12	3	54	8	4	47
27	9	42										7	7	25	4	3	30	11	2	8				10	2	53	9	2	60
18	3	36										15	5	31	9	3	26	12	1	12				15	1	41	7	9	49
27	7	34										11	8	33	6	0	17	0	0	11				8	3	33	11	2	44
24	3	41										13	9	24	10	4	14	0	1	8				15	4	48	10	6	46
20	16	22										11	9	25	9	4	17	0	0	11				11	3	53	7	4	43
22	7	33										15	7	31	17	3	15	1	4	12				8	3	39	10	1	42
19	8	42										11	5	28	5	3	12	11	2	10				7	2	55	17	7	48
28	5	44										5	8	28	6	5	25	18	1	9				12	2	49	14	4	46
24	7	36										10	10	26	8	4	20	18	1	11				9	3	50	6	5	43
27	7	30										7	3	26	14	7	19	19	1	13				8	2	56	19	2	43
21	9	43										11	7	32	10	4	10	15	3	12				13	2	42	11	6	50
27	14	36										12	3	29	14	2	19	10	0	10				12	2	47	12	7	43
22	7	31										9	7	31	11	0	10	12	1	16				8	2	54
34	5	32										10	7	32	9	3	25	9	4	13				14	3	60
22	10	34										9	11	28	9	4	12	7	3	11				8	3	60
23	9	38										9	5	37	7	3	24	7	1	10				10	3	49
26	4	38										12	10	22	3	4	14	7	0	7				11	2	47
26	11	28										11	3	21	16	1	17	9	2	7				7	2	40
26	11	38										9	8	38	5	3	23	11	1	12				14	4	53
20	7	39										7	4	31	8	3	18	3	1	10				12	3	38
29	12	28										8	3	37	10	2	19	12	0	10
14	8	37										8	7	30	11	7	21	13	1	10
21	10	38										10	4	34	3	2	24	9	3	5
16	9	35										5	5	34	11	3	17	13	2	14
23	8	34										8	7	30	10	5	20	13	2	11
32	10	37										6	10	29	9	4	16	14	3	9
25	7	36										9	6	27	11	2	13	10	3	14
29	9	37										14	7	34	10	3	18	16	1	10
25	6	37										6	4	27	12	2	15	19	1	8
27	10	28										10	9	34	10	5	17	9	3	18
15	4	45										7	10	34	7	4	22	10	1	10
21	7	26										6	12	33	4	2	14	0	1	9
27	6	33										6	6	41	4	5	16	11	0	8
26	5	36										9	8	27	5	7	31	12	1	9
34	7	34										3	9	27	6	5	27	13	1	15
22	4	38										7	3	21	10	3	17	12	3	10
21	7	30										10	7	27	23	2	15	9	2	9
22	6	31										7	3	30	11	3	18	8	1	8
27	10	37										8	2	32	2	2	19	12	1	13
23	10	32										15	7	32	13	6	18	1	1	5
17	7	37										13	6	35	11	7	24	8	1	10
26	10	44										11	3	33	7	7	34	12	2	10
18	7	37										6	7	27	8	8	23	10	2	11
28	7	41										8	10	29	5	2	19	12	1	13
24	3	40										0	5	33	7	6	31	14	4	12
16	8	42										7	8	28	14	4	13	8	2	11
27	7	39										15	9	33	8	4	10	10	2	14
20	2	41										5	12	31	9	2	12	11	3	10
22	10	33										7	7	32	12	2	17	13	3	10
31	12	40										11	7	28	13	4	17	17	2	5
22	7	39										8	3	23	12	7	38	7	2	11
22	4	42										12	6	33	16	4	16	1	3	8
18	9	23										12	4	29	12	8	27	7	2	9
22	8	36										9	7	31	10	3	14	10	2	14
20	6	38										6	8	28	10	9	25	12	0	14
20	10	21										8	7	26	11	6	22	9	4	10
12	7	26										12	6	36	10	5	23	6	2	8
17	13	31										13	7	27	16	7	27	9	1	9
31	11	32										7	2	28	6	4	26	14	2	12
20	7	38										11	5	28	14	0	17	10	3	8
26	11	34										7	9	25	3	5	22	8	2	6
22	9	27										13	6	27	6	10	21	0	0	9
23	10	35										11	8	32	8	5	13	10	1	6
29	8	48										17	9	33	15	1	12	8	2	6
21	10	31										5	4	34	8	8	33	1	3	12
20	4	43										16	8	30	10	9	23	12	1	9
14	17	40										8	5	24	11	8	24	0	0	11
14	13	42										8	9	21	13	3	13	1	2	12
18	8	33										7	4	24	10	2	16	11	2	7
25	5	31										4	9	28	8	7	22	1	0	6
22	12	38										10	5	26	6	9	15	8	1	5
28	8	32										6	3	38	4	3	15	0	5	13
21	8	26										7	7	30	9	7	23	12	2	14
22	13	45										7	5	27	9	2	16	12	2	14
21	8	36										12	5	44	10	3	22	5	2	8
16	7	31										9	2	32	10	3	20	10	4	9
18	7	40										8	10	28	8	2	19	9	1	12
27	6	32										5	3	37	9	6	23	14	2	15
21	8	38										9	8	30	13	3	22	8	2	7
31	2	26										8	4	26	15	5	16	16	3	13
29	6	38										10	6	20	9	7	27	12	1	8
31	8	40										10	9	33	8	5	25	10	1	15
24	7	27										6	9	29	9	2	13	6	1	11
25	9	37										12	9	25	7	7	18	17	0	11
19	4	46										10	6	30	8	6	29	6	3	10
16	10	38										5	10	29	14	3	23	12	2	11
21	10	37										8	6	27	6	7	29	14	1	12
25	4	47										9	10	34	7	3	8	11	1	7
16	7	36										9	3	31	9	3	26	13	2	9
21	6	34										5	3	35	10	4	21	6	2	9
18	10	31										8	6	26	4	3	26	12	0	5
20	14	31										7	9	27	8	9	30	8	3	5
24	10	25										13	5	40	7	4	21	14	2	13
25	4	35										10	9	37	6	6	18	10	3	8
22	9	34										4	10	23	9	9	22	0	0	9
22	9	30										10	4	29	9	6	18	13	3	13
21	7	30										15	8	35	9	3	14	12	0	12
28	6	33										4	10	30	14	4	18	0	0	8
24	9	33										6	10	24	8	4	18	18	1	12
16	6	25										8	10	31	6	4	15	4	0	11
22	1	40										8	6	35	7	5	21	10	2	12
22	7	33										7	8	33	7	4	15	11	2	7
23	6	32										8	10	37	8	5	18	11	0	9
24	7	41										9	7	28	10	3	17	10	1	13
18	6	34										9	4	27	1	2	17	11	0	11
27	12	38										10	8	30	7	6	11	14	3	9
19	9	36										4	6	29	8	6	21	9	1	15
10	12	33										5	9	33	10	5	31	18	2	9
25	5	33										9	3	34	11	0	12	5	1	10
17	2	36										10	6	23	7	0	14	20	4	10
28	5	39										8	3	33	8	4	20	14	3	11
19	1	45										7	9	34	12	6	19	19	2	14
16	5	31										12	8	36	11	3	16	15	2	9
21	2	37										7	6	32	6	6	14	12	4	4
20	7	37										7	8	27	10	5	24	15	2	13
18	7	32										12	3	33	8	0	16	11	1	14
34	7	40													5	3	23	14	0	7
30	10	35													10	7	19	11	0	7
24	8	51													11	6	25	17	1	11
21	7	28													10	5	29	18	1	11
22	5	43													4	7	22	7	1	7
26	6	33													11	1	26	8	0	7
19	4	32													10	3	23	13	5	13
19	7	32													14	6	14	14	2	8
26	4	47													6	4	23	18	5	12
16	7	46													11	1	13	13	3	16
29	8	38													5	10	23	16	1	9
20	13	34													3	3	19	2	0	12
26	6	35													7	7	23	10	1	13
24	14	32													9	11	34	7	1	10
26	7	43													14	8	18	14	1	9
23	16	36													4	4	17	8	1	6
23	16	29													8	2	17	12	4	9
15	14	27													17	2	14	9	3	6
18	5	37													9	2	14	14	2	9
28	7	39													10	6	18	7	4	13
28	11	38													5	5	25	12	1	6
28	11	31													11	3	20	16	5	19
22	5	39													4	9	32	12	2	16
27	7	37													11	3	19	13	1	12
23	5	35													12	6	26	13	1	13
25	10	30													13	7	26	17	3	11
30	8	37													8	6	20	11	2	14
26	3	34													9	7	21	11	4	12
29	9	38													4	4	19	8	3	9
15	3	37													11	4	13
25	9	41													14	7	25
20	4	41													9	3	12
21	7	35													13	1	18
19	9	32													8	8	23
28	11	44													11	1	13
22	4	38													8	0	12
23	7	33													12	5	14
14	5	34													10	2	19
22	15	34													10	5	20
27	6	41													13	0	16
21	7	30													7	2	19
23	6	36													8	3	19
22	11	32													15	2	13
32	7	42													15	1	12
32	8	50													7	6	20
25	9	35													8	6	14
32	7	41													7	6	26
29	13	37													12	1	18
27	12	34													8	5	15
24	13	31													13	9	24
27	5	44													12	4	25
19	7	35													15	2	14
26	12	37													9	3	13
19	12	23													16	1	20
15	10	28													11	9	21
22	6	40													9	8	19
29	5	35													11	1	25
22	10	24													10	4	24
32	9	41													7	2	21
24	10	35													7	8	18
33	5	34													10	6	20
25	7	23													16	1	14
28	8	35													8	5	18
9	14	43													13	4	13
27	8	38													9	6	21
23	6	33													17	4	13
25	8	41													11	3	21
21	9	42													7	5	17
23	11	34													7	6	21
29	7	33													9	3	16
23	8	37													12	4	9
22	9	43													13	6	22
21	2	37													12	0	17
17	2	34													5	7	20
22	4	33													15	0	15
22	6	33													8	2	23
18	8	35													4	2	19
23	6	38													9	3	13
21	11	38													7	7	23
24	10	37													5	5	17
22	7	34													14	8	26
11	4	18													10	7	20
27	2	38													9	7	19
26	5	43													16	5	27
18	8	32													11	0	11
19	8	23													13	3	9
15	8	33													15	3	18
18	14	36													11	1	15
24	7	43													9	4	21
23	9	49													19	1	15
25	8	42													6	5	17
23	9	31													10	7	26
25	4	40													7	3	13
25	9	32													9	8	24
28	7	50													11	10	25
28	5	38													11	0	8
20	4	43													11	7	24
31	2	26													7	5	22
25	8	37													8	4	27
20	3	37													13	1	16
31	3	30													11	3	18
24	6	43													9	3	20
27	13	30													11	3	19
31	12	41													8	6	19
16	6	36													18	0	9
27	10	34													4	7	22
32	5	33													7	5	29
20	8	35													9	2	15
17	8	32													9	5	22
22	6	36													10	6	24
23	5	46													6	3	30
26	3	33													11	2	12
16	3	39													8	0	11
21	10	30													11	4	18
18	3	46													12	4	21
24	3	31													8	4	20
23	9	39													14	6	13
21	13	33													6	9	26
15	3	42													10	3	17
17	5	31													11	8	31
27	7	37													12	1	11
16	5	34													14	2	15
21	3	35													10	6	27
12	4	29													9	3	17
20	9	31													11	5	26
22	10	23													10	1	15
24	1	43													6	2	18
24	3	29													5	4	20
17	8	35													9	4	17
26	7	31													10	5	24
23	8	41													11	5	13
26	10	29
8	4	18
22	9	34
23	6	42
21	7	31
25	9	29
27	12	34
35	8	27
23	3	41
18	5	41
19	3	29
24	7	34
24	8	40
22	1	33
19	7	40
24	7	29
21	7	31
24	0	39
27	9	38
29	3	39
30	5	42
27	3	35
14	10	24
27	5	31
18	5	34
25	7	34
27	7	35
25	7	42
23	16	39
22	7	44
25	9	36
25	5	35
23	3	34
29	3	43
28	5	47
22	8	32
19	5	42
27	14	31
26	9	42
25	9	45
27	9	26
28	11	37
24	5	38
23	9	40
27	12	42
20	8	40
28	9	43
23	7	32
26	5	45
24	7	41
23	5	45
34	13	38
33	5	35
23	6	33
26	8	43
29	7	31
28	7	30
27	6	40
28	10	37
20	5	40
22	7	34
29	5	31
27	4	38
28	8	36
21	10	30
21	6	27
30	5	39
21	3	44
23	9	29
28	8	31
20	4	41
21	4	38
34	5	45
28	3	46
19	9	44
25	4	43
24	8	35
29	5	32
22	8	34
30	9	32
27	6	35
22	4	39
20	5	36
24	6	35
22	5	36
14	7	23
16	8	31
32	10	46
20	11	40
25	8	39
22	6	31
18	2	38
24	5	43
23	9	37
13	8	30
29	5	36
25	7	31
22	7	37
38	5	35
21	8	29
18	9	36
20	8	36
27	2	28
21	13	36
23	3	46
28	6	45
23	5	29
27	4	41
26	7	33
30	6	37
21	16	32
22	7	31
19	13	32
14	2	39
25	10	26
16	11	34
23	5	41
25	5	36
24	13	35
25	6	44
24	9	29
24	5	41
23	12	33
20	16	33
23	12	26
21	4	37
22	4	34
22	5	35
29	10	36
29	6	29
32	6	32
23	6	31
16	6	33
19	7	24
22	10	37
29	10	41
28	5	27
23	5	35
17	6	34
35	9	32
20	7	48
21	12	34
27	7	41
34	9	30
20	6	43
21	9	27
19	14	27
17	11	33
28	5	38
28	6	28
32	1	34
28	3	28
23	9	34
27	10	31
21	7	37
23	7	43
26	5	47
27	8	31
12	6	46
22	5	35
25	6	44
23	11	27
23	8	35
23	12	37
23	9	41
32	11	40
23	6	42
27	10	35
20	4	36
17	13	32
23	6	38
15	7	37
26	16	20
34	5	36
23	10	31
20	5	37
22	10	30
28	11	53
22	8	39
26	9	33
19	5	39
22	11	32
28	14	28
28	4	37
30	7	41
26	10	38
24	1	36
20	4	39
28	7	40
27	12	35
17	10	25
25	4	30
23	8	36
36	3	32
20	6	32
23	4	30
30	9	34
25	8	32
26	4	38
21	6	45
23	5	23
33	13	27
32	5	43
15	4	23
34	8	36
20	5	24
34	8	47
23	1	41
26	7	39
17	9	30
25	5	28
28	6	35
24	14	34
20	6	33
26	3	30
27	8	44
24	5	31
22	6	30
28	5	38
26	6	44
25	6	43
28	7	29
27	4	30
19	7	35
24	6	37
24	13	32
24	8	25
22	2	28
28	8	43
28	6	40
28	1	36
25	10	27
26	3	34
22	6	39
24	4	27
20	12	38
