# Supplementary material for: Localized inhibition in the Drosophila mushroom body
Source: eLife. 2020 Sep 21;9:e56954. doi: 10.7554/eLife.56954 (PMC7541083; doi:10.7554/eLife.56954)
Supplement: Figure 8—source data 1. [file elife-56954-fig8-data1.xlsx]

## Sheet: Hstim
Hstim	True data												Simulation from connectome skeleton							Simulation from straight line skeleton (Fig S4)
					red dye fit curve								space constant = 25 µm		space constant = 50 µm		space constant = 75 µm
	CtoH		CtoV				CtoH	CtoV	avg peduncle	merge CtoH	merge CtoV		CtoH	CtoV	CtoH	CtoV	CtoH	CtoV		CtoH 25	CtoV 25	CtoH 50	CtoV 50	CtoH 75	CtoV 75
Distance	gcamp	red dye	gcamp	red dye	0.8404*exp(-(0:10:40)'/25.94)	0.7289*exp(-(210:-10:0)'/38.11)
0	0.0272204	-0.00443232	0.0272204	-0.00443232		0.00294813	0.00294813	0.00192328	0.00243571	0.00243571	0.00243571		0.020336	0.020336	0.069059	0.069059	0.1494	0.1494		0.005452	0.005452	0.0380265	0.0380265	0.104163	0.104163
10	0.0245649	0.0119494	0.0245649	0.0119494		0.0038327	0.0038327	0.00259044	0.00321157	0.00321157	0.00321157		0.016565	0.016565	0.065942	0.065942	0.14682	0.14682		0.00760793	0.00760793	0.0462649	0.0462649	0.118916	0.118916
20	-0.00225853	-0.0324325	-0.00225853	-0.0324325		0.00498268	0.00498268	0.00348904	0.00423586	0.00423586	0.00423586		0.022677	0.022677	0.079039	0.079039	0.16604	0.16604		0.0103045	0.0103045	0.0561216	0.0561216	0.135648	0.135648
30	-0.014501	0.0823139	-0.014501	0.0823139		0.00647771	0.00647771	0.00469934	0.00558852	0.00558852	0.00558852		0.021062	0.021062	0.079464	0.079464	0.16774	0.16774		0.0137581	0.0137581	0.0679162	0.0679162	0.154614	0.154614
40	0.0166071	0.166506	0.0166071	0.166506		0.00842131	0.00842131	0.00632948	0.00737539	0.00737539	0.00737539		0.022425	0.022425	0.10215	0.10215	0.20394	0.20394		0.0182367	0.0182367	0.0820217	0.0820217	0.176094	0.176094
50	0.0847376	-0.0495703	0.0847376	-0.0495703		0.0109481	0.0109481	0.0085251	0.00973658	0.00973658	0.00973658		0.020696	0.020696	0.11417	0.11417	0.22382	0.22382		0.0240811	0.0240811	0.0988714	0.0988714	0.200393	0.200393
60	0.0932865	-0.00525513	0.0932865	-0.00525513		0.014233	0.014233	0.0114823	0.0128577	0.0128577	0.0128577		0.022957	0.022957	0.13368	0.13368	0.25054	0.25054		0.0317294	0.0317294	0.118966	0.118966	0.227843	0.227843
70	0.147864	0.0831868	0.147864	0.0831868		0.0185035	0.0185035	0.0154654	0.0169845	0.0169845	0.0169845		0.031091	0.031091	0.15735	0.15735	0.27998	0.27998		0.0417484	0.0417484	0.142882	0.142882	0.2588	0.2588
80	0.119511	0.124471	0.119511	0.124471		0.0240554	0.0240554	0.0208302	0.0224428	0.0224428	0.0224428		0.049285	0.049285	0.20066	0.20066	0.32908	0.32908		0.0548724	0.0548724	0.17127	0.17127	0.293637	0.293637
90	0.235578	0.104985	0.235578	0.104985		0.031273	0.031273	0.0280559	0.0296645	0.0296645	0.0296645		0.068449	0.068449	0.24165	0.24165	0.37332	0.37332		0.0720515	0.0720515	0.204866	0.204866	0.332741	0.332741
100	0.270509	-0.00127075	0.270509	-0.00127075		0.0406563	0.0406563	0.0377882	0.0392223	0.0392223	0.0392223		0.10047	0.10047	0.29573	0.29573	0.42804	0.42804		0.0945133	0.0945133	0.244482	0.244482	0.3765	0.3765
110	0.300375	-0.0766384	0.300375	-0.0766384		0.0528551	0.0528551	0.0508964	0.0518757	0.0518757	0.0518757		0.13685	0.13685	0.35586	0.35586	0.4866	0.4866		0.123838	0.123838	0.290999	0.290999	0.425284	0.425284
120	0.373614	-0.0249842	0.373614	-0.0249842		0.0687139	0.0687139	0.0685517	0.0686328	0.0686328	0.0686328		0.18331	0.18331	0.41806	0.41806	0.54249	0.54249		0.16205	0.16205	0.345343	0.345343	0.479418	0.479418
130	0.472693	0.137673	0.472693	0.137673		0.0893311	0.0893311	0.0923315	0.0908313	0.0908313	0.0908313		0.23102	0.23102	0.48769	0.48769	0.60523	0.60523		0.211729	0.211729	0.408452	0.408452	0.539151	0.539151
140	0.642428	0.0765184	0.642428	0.0765184		0.116134	0.116134	0.12436	0.120247	0.120247	0.120247		0.3436	0.3436	0.60455	0.60455	0.70017	0.70017		0.276143	0.276143	0.48121	0.48121	0.604595	0.604595
150	0.789429	0.192982	0.789429	0.192982		0.15098	0.15098	0.167499	0.159239	0.159239	0.159239		0.45766	0.45766	0.69086	0.69086	0.76307	0.76307		0.359389	0.359389	0.564355	0.564355	0.675656	0.675656
160	0.889801	0.32452	0.889801	0.32452		0.196281	0.196281	0.225602	0.210941	0.210941	0.210941		0.53952	0.53952	0.7505	0.7505	0.80628	0.80628		0.466551	0.466551	0.658328	0.658328	0.751931	0.751931
170	1	0.325678	1	0.325678		0.255173	0.255173	0.303861	0.279517	0.279517	0.279517		0.54701	0.54701	0.74899	0.74899	0.80735	0.80735		0.603852	0.603852	0.763062	0.763062	0.832564	0.832564
180	0.893133	0.296229	0.893133	0.296229		0.331737	0.331737	0.409266	0.370502	0.370502	0.370502		0.53069	0.53069	0.71646	0.71646	0.78103	0.78103		0.778758	0.778758	0.877671	0.877671	0.916057	0.916057
190	0.874994	0.21788	0.733285	0.534635		0.431272	0.431272	0.551236		0.431272	0.551236		0.4181	0.54365	0.65313	0.6557	0.75584	0.71255		1	1	1	1	1	1
200	0.923006	0.626849	0.733712	0.82433		0.560673	0.560673	0.742453		0.560673	0.742453		0.51051	1	0.75976	1	0.83908	0.96315		0.892784	0.948946	0.939346	0.96891	0.957328	0.977538
210	0.699603	0.764405	0.776613	1	0.8404	0.7289	0.78465	1		0.78465	1		0.48907	0.96222	0.74557	0.93775	0.82858	0.9128		0.809364	0.891574	0.874769	0.92159	0.907702	0.940702
220	0.597747	0.703372	0.817788	0.724279	0.571562		0.571562	0.649837		0.571562	0.649837		0.57616	0.73261	0.85028	0.78217	0.91074	0.79781		0.687889	0.763016	0.787051	0.837021	0.840651	0.877811
230	0.647763	0.444203	0.686922	0.383085	0.388723		0.388723	0.422287		0.388723	0.422287		0.64425	0.5215	0.95758	0.62721	1	0.67328		0.554637	0.617974	0.68849	0.737804	0.764103	0.802733
240	0.728346	0.2125	0.625629	0.224691	0.264374		0.264374	0.274418		0.264374	0.274418		0.60706	0.37596	0.91275	0.52631	0.96186	0.60005		0.427449	0.482026	0.588704	0.636848	0.684521	0.723872
250	0.586161	0.0722896	0.483952	0.101033	0.179802		0.179802	0.178327		0.179802	0.178327		0.51805	0.25796	0.81252	0.38917	0.88181	0.46832		0.312531	0.365029	0.492918	0.54108	0.60581	0.646154
260			0.487161	0.289097				0.115883			0.115883			0.23418		0.34192		0.41022			0.268746		0.45379		0.572306
270			0.266714	0.031861				0.0753051			0.0753051			0.14206		0.24883		0.32633			0.191036		0.376108		0.503688

## Sheet: Vstim
Vstim	true data							Simulation from connectome skeleton							Simulation from straight line skeleton (Fig S4)
								space constant = 25 µm		space constant = 50 µm		space constant = 75 µm
	CtoH		CtoV		CtoH	CtoV		CtoH	CtoV	CtoH	CtoV	CtoH	CtoV
Distance	gcamp	red dye	gcamp	red dye	red dye curve fit	red dye curve fit									CtoH 25	CtoV 25	CtoH 50	CtoV 50	CtoH 75	CtoV 75
0	0.00675868	0.00712724	0.00675868	0.00712724	0	0		1.47e-05	1.47e-05	0.0020179	0.0020179	0.01324	0.01324		3.86822e-05	3.86822e-05	0.00606395	0.00606395	0.0331571	0.0331571
10	-0.00908824	0.0783219	-0.00908824	0.0783219	0	0		1.5e-05	1.5e-05	0.0020127	0.0020127	0.013197	0.013197		5.7707e-05	5.7707e-05	0.00740653	0.00740653	0.0378863	0.0378863
20	-0.0043598	0.0234511	-0.0043598	0.0234511	0	0		2.06e-05	2.06e-05	0.0024035	0.0024035	0.01489	0.01489		8.60887e-05	8.60887e-05	0.00904635	0.00904635	0.0432901	0.0432901
30	-0.0276487	-0.0126209	-0.0276487	-0.0126209	0	0		2.28e-05	2.28e-05	0.0024859	0.0024859	0.015181	0.015181		0.000128429	0.000128429	0.0110492	0.0110492	0.0494646	0.0494646
40	0.0576019	0.037861	0.0576019	0.037861	0	0		4.27e-05	4.27e-05	0.0034206	0.0034206	0.018811	0.018811		0.000191594	0.000191594	0.0134956	0.0134956	0.0565198	0.0565198
50	-0.0159387	0.0828246	-0.0159387	0.0828246	0	0		6.25e-05	6.25e-05	0.0040672	0.0040672	0.021075	0.021075		0.000285825	0.000285825	0.0164835	0.0164835	0.0645812	0.0645812
60	0.0818869	0.0063067	0.0818869	0.0063067	0	0		8.38e-05	8.38e-05	0.0047931	0.0047931	0.023575	0.023575		0.0004264	0.0004264	0.020133	0.020133	0.0737925	0.0737925
70	0.0156181	0.0444678	0.0156181	0.0444678	0	0		0.00012357	0.00012357	0.0057605	0.0057605	0.026594	0.026594		0.000636114	0.000636114	0.0245905	0.0245905	0.0843176	0.0843176
80	-0.0134729	0.0715917	-0.0134729	0.0715917	0	0		0.00020123	0.00020123	0.0073453	0.0073453	0.031242	0.031242		0.000948971	0.000948971	0.030035	0.030035	0.0963439	0.0963439
90	-0.0156813	0.0192429	-0.0156813	0.0192429	0	0		0.00030512	0.00030512	0.008965	0.008965	0.035617	0.035617		0.0014157	0.0014157	0.0366848	0.0366848	0.110086	0.110086
100	0.0252171	0.0345655	0.0252171	0.0345655	0	0		0.00048792	0.00048792	0.01118	0.01118	0.041129	0.041129		0.00211197	0.00211197	0.0448069	0.0448069	0.125787	0.125787
110	0.00793502	0.0602816	0.00793502	0.0602816	0	0		0.00091242	0.00091242	0.01492	0.01492	0.049056	0.049056		0.0031507	0.0031507	0.0547273	0.0547273	0.143728	0.143728
120	0.0206537	0.0576891	0.0206537	0.0576891	0	0		0.0014096	0.0014096	0.018327	0.018327	0.055821	0.055821		0.00470028	0.00470028	0.066844	0.066844	0.164228	0.164228
130	0.0272983	0.0835605	0.0272983	0.0835605	0	0		0.0019811	0.0019811	0.021097	0.021097	0.061521	0.061521		0.007012	0.007012	0.0816435	0.0816435	0.187652	0.187652
140	0.00476834	0.0562721	0.00476834	0.0562721	0	0		0.0029762	0.0029762	0.025799	0.025799	0.070609	0.070609		0.0104607	0.0104607	0.0997196	0.0997196	0.214417	0.214417
150	0.0167122	-0.0120496	0.0167122	-0.0120496	0	0		0.0044406	0.0044406	0.032932	0.032932	0.083139	0.083139		0.0156055	0.0156055	0.121798	0.121798	0.245	0.245
160	0.0813696	0.0497391	0.0813696	0.0497391	0	0		0.0065439	0.0065439	0.039574	0.039574	0.094457	0.094457		0.0232807	0.0232807	0.148764	0.148764	0.279944	0.279944
170	0.0628317	0.0208692	0.0628317	0.0208692	0	0		0.010513	0.010513	0.05153	0.05153	0.11221	0.11221		0.0347307	0.0347307	0.181701	0.181701	0.319873	0.319873
180	0.156894	0.0540621	0.156894	0.0540621	0.000391096	0.000391096		0.0091678	0.0091678	0.057807	0.057807	0.1307	0.1307		0.0518121	0.0518121	0.22193	0.22193	0.365497	0.365497
190	0.0845271	0.0441238	0.0920893	0.152102	0	0.000935231		0.0050536	0.023587	0.037786	0.12523	0.10152	0.23721		0.0770633	0.0770633	0.270962	0.270962	0.417562	0.417562
200	0.138153	-0.0201063	0.0851172	0.0356772	0	0.00223642		0.0061519	0.068367	0.044812	0.20012	0.11516	0.30516		0.0516571	0.114257	0.221845	0.330622	0.365439	0.476902
210	0.0329175	-0.00857913	0.227275	0.0203049	0	0.00534797		0.0036265	0.059136	0.041066	0.12912	0.11573	0.19196		0.0346268	0.168655	0.181631	0.402958	0.319822	0.544354
220	0.0044093	-0.0138522	0.366501	-0.106546	0	0.0127886		0.0032032	0.095912	0.04613	0.16008	0.13066	0.2092		0.023211	0.247237	0.148707	0.49005	0.2799	0.620591
230	0.0021908	0.0346826	0.607262	0.00523508	0	0.0305816		0.0043077	0.17316	0.058088	0.26387	0.15289	0.31416		0.0155588	0.358346	0.121751	0.593423	0.244961	0.705708
240	-0.0111398	0.0267648	0.701249	0.0576727	0	0.0731298		0.0027574	0.13303	0.047758	0.17146	0.13521	0.20419		0.0104294	0.509479	0.0996815	0.712513	0.214383	0.798204
250	-0.00368073	-0.0296717	0.803131	0.262151	0	0.174876		0.0023413	0.4313	0.045921	0.51621	0.1321	0.56569		0.00699102	0.699985	0.0816123	0.840834	0.187622	0.89251
260			0.815199	0.37307		0.418182			0.82463		0.93042		0.96088			0.900599		0.956591		0.97305
270			1	1		1			1		1		1			1		1		1

## Sheet: Cstim
Cstim	true data							Simulation from connectome skeleton							Simulation from straight line skeleton (Fig S4)
								25 um		50 um		75 um
	CtoH		CtoV		curve fit exp decay			CtoH	CtoV	CtoH	CtoV	CtoH	CtoV
	gcamp	red dye	gcamp	red dye	ctov										CtoH 25	CtoV 25	CtoH 50	CtoV 50	CtoH 75	CtoV 75
0	1	0.591156	1	0.591156	0.538033			1	1	1	1	1	1		0.574589	0.574589	0.701731	0.701731	0.774201	0.774201
10	0.886831	0.770593	0.886831	0.770593	0.596588			0.75738	0.75738	0.81501	0.81501	0.84005	0.84005		0.72318	0.72318	0.809103	0.809103	0.856465	0.856465
20	0.815271	0.64013	0.815271	0.64013	0.661515			0.97042	0.97042	0.91781	0.91781	0.90827	0.90827		0.840441	0.840441	0.895731	0.895731	0.922751	0.922751
30	0.728674	0.525942	0.728674	0.525942	0.733508			0.83823	0.83823	0.82377	0.82377	0.83004	0.83004		0.929213	0.929213	0.9593	0.9593	0.970841	0.970841
40	0.397133	0.650455	0.397133	0.650455	0.813336			0.604	0.604	0.60948	0.60948	0.64884	0.64884		0.98596	0.98596	0.99594	0.99594	0.997823	0.997823
50	0.34197	0.999232	0.34197	0.999232	0.901851			0.33643	0.33643	0.36585	0.36585	0.42726	0.42726		1	1	1	1	1	1
60	0.438802	1	0.438802	1	1	exp(-(60:-10:0)'/96.8)		0.094941	0.094941	0.19371	0.19371	0.31935	0.31935		0.951564	0.951564	0.963747	0.963747	0.972777	0.972777
70	0.633423	0.712389	0.633423	0.712389	0.606227	exp(-(0:10:210)'/19.98)		0.11828	0.11828	0.19007	0.19007	0.29003	0.29003		0.808352	0.808352	0.876973	0.876973	0.910532	0.910532
80	0.64315	0.271148	0.64315	0.271148	0.367511			0.1012	0.1012	0.20665	0.20665	0.32497	0.32497		0.645219	0.645219	0.771318	0.771318	0.832767	0.832767
90	0.65617	0.0166941	0.65617	0.0166941	0.222795			0.093353	0.093353	0.21038	0.21038	0.33443	0.33443		0.49517	0.49517	0.663836	0.663836	0.750594	0.750594
100	0.584367	0.0988818	0.584367	0.0988818	0.135065			0.087445	0.087445	0.2099	0.2099	0.33679	0.33679		0.36992	0.36992	0.563123	0.563123	0.670122	0.670122
110	0.509463	0.0314265	0.509463	0.0314265	0.0818798			0.069675	0.069675	0.19654	0.19654	0.33325	0.33325		0.27101	0.27101	0.472962	0.472962	0.594512	0.594512
120	0.29375	0.273862	0.29375	0.273862	0.0496378			0.064361	0.064361	0.20546	0.20546	0.34851	0.34851		0.195649	0.195649	0.394479	0.394479	0.525201	0.525201
130	0.214865	0.259202	0.214865	0.259202	0.0300918			0.026453	0.026453	0.12758	0.12758	0.26247	0.26247		0.139649	0.139649	0.3274	0.3274	0.462643	0.462643
140	0.237427	0.252119	0.237427	0.252119	0.0182424			0.023099	0.023099	0.12835	0.12835	0.27075	0.27075		0.0987965	0.0987965	0.270777	0.270777	0.406746	0.406746
150	0.152042	0.2333	0.152042	0.2333	0.0110591			0.025495	0.025495	0.14337	0.14337	0.29111	0.29111		0.0694201	0.0694201	0.223393	0.223393	0.357137	0.357137
160	0.0226274	0.143294	0.0226274	0.143294	0.00670431			0.019149	0.019149	0.1201	0.1201	0.25298	0.25298		0.0485455	0.0485455	0.183989	0.183989	0.313307	0.313307
170	0.151164	-0.0230021	0.151164	-0.0230021	0.00406433			0.010871	0.010871	0.07119	0.07119	0.16233	0.16233		0.0338724	0.0338724	0.15137	0.15137	0.274705	0.274705
180	0.05092	-0.0587175	0.05092	-0.0587175	0.00246391			0.0077067	0.0077067	0.055723	0.055723	0.13256	0.13256		0.0236793	0.0236793	0.124465	0.124465	0.24078	0.24078
190	0.0864881	0.0937485	0.0884846	0.308441	0.00149369			0.0011037	0.0022129	0.014896	0.016956	0.059821	0.053101		0.016712	0.016712	0.102334	0.102334	0.211014	0.211014
200	0.0184661	0.0662044	0.0993164	0.121856	0.000905515			0.0012841	0.0039144	0.019594	0.039454	0.071754	0.11039		0.0114559	0.0114569	0.0839134	0.0839149	0.18476	0.184761
210	0.0174319	0.0371716	0.0193532	-0.08356	0.000548948			0.0005042	0.0029486	0.013068	0.03498	0.057095	0.10826		0.0078318	0.00783387	0.0687797	0.0687827	0.161748	0.161751
220	0.00542182	-0.0144095	0.0357079	-0.0203554	0.000332787			0.00061943	0.0025884	0.015005	0.036392	0.06167	0.11227		0.00534085	0.00534437	0.0563574	0.056362	0.141588	0.141592
230	0.0187788	0.0860274	0.00620085	0.0805744	0.000201745			0.00082901	0.00097549	0.018881	0.018704	0.071894	0.069418		0.00363301	0.00363854	0.0461672	0.0461737	0.12393	0.123936
240	0.0169095	0.0532014	0.0313819	-0.0267355	0.000122303			0.00066702	0.00050116	0.016931	0.012962	0.066924	0.056295		0.00246399	0.00247243	0.0378119	0.0378205	0.108469	0.108477
250	0.0461497	0.105551	0.00566007	0.0212109	7.41434e-05			0.00040683	0.00023239	0.012205	0.0073037	0.053766	0.034645		0.00166403	0.00167676	0.0309631	0.0309742	0.0949328	0.0949422
260			-0.0118026	0.0651284	4.49477e-05				0.00011203		0.0028727		0.016724			0.0011345		0.0253645		0.083094
270			0.017087	0.120237	2.72485e-05				6.66e-05		0.0024078		0.014443			0.000765023		0.0207686		0.0727229

## Sheet: KC-KC inhibition (K-M)
all KCs (Fig 8K)						within subtypes (Fig 8L)						within subtypes, calyx only (Fig 8M)
25	50	75	inf	25,scrambled		25	50	75	Inf	25, scrambled		25	50	75	Inf	25, scrambled
3.0766	1.809	1.4952	1.1501	1.057		1.4735	1.0217	0.92188	0.84821	0.77911		1.1941	0.90444	0.82105	0.7555	0.965
3.6566	1.9766	1.5939	1.2309	1.1851		1.6983	1.1149	0.9881	0.90783	0.87498		1.1737	0.83066	0.73756	0.71348	1.0248
3.2216	1.8186	1.5044	1.2107	1.2435		1.6323	1.0758	0.95976	0.89292	0.91661		1.4483	1.0757	0.99438	0.96571	0.77837
2.7483	1.7049	1.4812	1.2107	1.1974		1.3734	0.99618	0.93507	0.89292	0.88272		0.76821	0.62499	0.6011	0.62945	1.1381
3.7229	1.8954	1.4933	1.1097	1.1375		1.8604	1.1496	0.97984	0.81841	0.8415		2.6122	1.442	1.1329	0.92366	0.765
3.5409	1.8999	1.5555	1.1905	1.2117		1.8437	1.1751	1.0315	0.87802	0.89591		1.3852	0.91062	0.8049	0.7555	1.0405
3.2677	1.8874	1.551	1.2107	1.0522		1.4911	1.0375	0.94006	0.89292	0.77787		1.2287	0.89931	0.82855	0.83957	0.59787
4.6858	2.3185	1.7833	1.2914	1.1959		2.3425	1.3795	1.1526	0.95254	0.87907		2.9386	1.7454	1.326	0.83957	1.3487
4.1385	2.0149	1.5703	1.1299	1.2458		2.0074	1.157	0.97899	0.83331	0.91922		1.621	0.92046	0.75654	0.62945	1.0263
3.0836	1.6777	1.3807	1.1097	1.0775		1.5616	0.98865	0.87537	0.81841	0.7966		1.4722	1.0002	0.90824	0.88161	0.71523
3.4376	1.7844	1.4318	1.1703	1.0935		1.6665	1.0276	0.89778	0.86311	0.8061		1.4593	1.0402	0.9478	0.92366	1.1312
3.4383	1.9513	1.5833	1.1299	1.2235		1.7716	1.1861	1.0367	0.83331	0.90366		1.8619	1.1254	0.88816	0.62945	0.68956
3.6062	2.0317	1.6374	1.2107	1.1307		1.7146	1.1886	1.052	0.89292	0.83313		1.601	1.0789	0.92588	0.7555	0.70384
3.5025	1.9628	1.6286	1.3116	1.2796		1.7667	1.1581	1.0366	0.96745	0.94535		1.501	0.91499	0.81552	0.88161	1.2064
4.3366	2.181	1.7118	1.3116	1.0504		2.1883	1.2988	1.0991	0.96745	0.77538		1.4364	1.0388	0.93764	0.88161	0.44865
3.5529	1.8446	1.4416	1.0492	1.0459		1.7535	1.0919	0.92436	0.77371	0.77083		1.544	1.0433	0.91439	0.83957	0.65654
4.1178	2.0173	1.6213	1.2309	1.3551		2.1074	1.2253	1.0539	0.90783	1.0016		1.6968	0.94831	0.77976	0.71348	1.2137
3.5921	1.9826	1.5694	1.1703	1.3404		1.6607	1.0914	0.95163	0.86311	0.98874		0.93535	0.74166	0.71282	0.7555	1.2469
4.5735	2.3705	1.8219	1.3116	1.141		2.2832	1.3852	1.1555	0.96745	0.84206		1.3652	0.99236	0.89218	0.83957	0.89345
3.0741	1.8502	1.5441	1.2914	1.5729		1.5659	1.093	0.98038	0.95254	1.1574		1.5614	1.1811	1.0824	1.0498	1.5942
3.8737	2.213	1.779	1.3116	1.163		2.0112	1.3436	1.1615	0.96745	0.85951		1.8632	1.2978	1.1	0.88161	1.2131
3.3995	1.9561	1.579	1.2309	1.1045		1.7531	1.1629	1.0123	0.90783	0.81591		1.457	1.1182	1.0229	0.96571	0.8151
3.3348	1.8892	1.5405	1.2511	1.0996		1.7409	1.1463	1.0015	0.92273	0.81091		1.4561	1.0838	0.98195	0.96571	0.87892
3.2645	1.8436	1.5065	1.2107	1.1323		1.6471	1.1169	0.98451	0.89292	0.83496		1.5967	1.1444	1.0456	1.0498	0.77139
3.11	1.8721	1.547	1.2309	1.0926		1.5855	1.1299	1.0077	0.90783	0.80635		1.1999	1.0139	0.95825	0.92366	0.81726
2.6453	1.7422	1.4994	1.2309	1.382		1.2947	0.98182	0.91694	0.90783	1.0203		0.9709	0.80555	0.76829	0.7555	0.9036
3.8796	2.1488	1.7425	1.3722	1.3194		1.845	1.1824	1.0466	1.0122	0.97651		1.1665	0.93344	0.90375	1.0078	0.86249
4.2103	2.1549	1.7216	1.352	1.7541		2.2451	1.3288	1.1291	0.99727	1.2933		2.0998	1.27	1.0854	0.96571	1.3986
3.5084	1.8554	1.5221	1.2511	1.0001		1.7807	1.1088	0.97607	0.92273	0.74014		1.7279	1.1066	0.96234	0.88161	0.903
3.8443	1.953	1.5519	1.1703	1.067		1.9134	1.1579	0.99274	0.86311	0.78725		2.0375	1.1494	0.95229	0.88161	0.71534
4.7522	2.1314	1.6372	1.2309	1.1785		2.4129	1.2837	1.0604	0.90783	0.87074		2.5463	1.3469	1.0915	0.92366	0.7714
4.7588	2.1674	1.6444	1.1905	1.1185		2.4296	1.366	1.1109	0.87802	0.82411		2.4058	1.3618	1.0837	0.88161	0.66826
3.3431	1.9653	1.6618	1.4328	1.423		1.7063	1.1837	1.0794	1.0569	1.0512		1.7701	1.3452	1.2344	1.1761	1.1923
3.4102	2.1468	1.8001	1.3318	1.3422		1.6338	1.2113	1.1084	0.98236	0.99204		1.1907	0.96444	0.90437	0.83957	0.75212
4.2404	2.4636	1.9705	1.4126	1.4885		2.0466	1.4128	1.2329	1.042	1.1003		1.69	1.1558	1.019	0.96571	1.2836
3.4536	2.1306	1.7952	1.4126	1.3523		1.678	1.1993	1.0971	1.042	0.9989		1.4001	1.0162	0.91778	0.88161	0.8514
4.4232	2.3713	1.8935	1.4328	1.499		2.1697	1.3553	1.1727	1.0569	1.1065		1.6235	1.1522	1.0458	1.0078	1.0285
3.8952	2.2529	1.8357	1.3924	1.4567		1.9127	1.3268	1.1771	1.0271	1.0753		1.715	1.1498	0.97922	0.83957	1.0458
3.6315	2.1287	1.7709	1.3722	1.3221		1.7829	1.2627	1.142	1.0122	0.9761		1.3416	1.0581	0.96942	0.88161	1.0562
4.1367	2.2444	1.8524	1.453	1.3649		2.0817	1.3561	1.2016	1.0718	1.0095		1.5048	1.0687	0.96291	0.88161	0.95605
3.7874	2.2294	1.8786	1.554	1.4424		1.8586	1.2733	1.157	1.1464	1.064		1.7284	1.3029	1.2109	1.1761	0.70666
3.859	2.2442	1.8571	1.4934	1.4709		1.8726	1.2855	1.1602	1.1017	1.084		1.6565	1.2846	1.1927	1.134	1.0052
3.7347	2.2564	1.8678	1.3722	1.4571		1.8044	1.2919	1.161	1.0122	1.0758		1.345	1.0087	0.91132	0.83957	0.74397
3.777	2.2136	1.8138	1.3722	1.5604		1.8457	1.2925	1.1509	1.0122	1.1496		1.6722	1.1652	1.043	0.96571	1.285
3.6846	2.1279	1.7654	1.3924	1.5581		1.778	1.248	1.1304	1.0271	1.1509		2.0025	1.2802	1.0971	1.0078	1.2498
4.194	2.4447	1.9996	1.5338	1.6102		2.0035	1.3773	1.2294	1.1315	1.1901		1.6964	1.2394	1.1405	1.134	0.83478
3.6313	2.1275	1.7894	1.4126	1.416		1.7704	1.2141	1.1076	1.042	1.046		1.46	1.0672	0.97686	0.92366	1.0607
3.6609	2.1258	1.7785	1.4732	1.4138		1.8645	1.2695	1.1441	1.0867	1.0401		1.5406	1.1624	1.0869	1.134	0.88819
3.4752	2.0785	1.7251	1.352	1.2363		1.6666	1.1916	1.0828	0.99727	0.91114		1.2478	1.0022	0.93519	0.88161	0.46491
3.7481	2.2202	1.8278	1.3924	1.5886		1.8706	1.3055	1.1623	1.0271	1.173		1.812	1.1943	1.0335	0.96571	1.1687
4.1243	2.3659	1.9527	1.4934	1.3673		1.9905	1.3487	1.2116	1.1017	1.0111		1.4221	1.0172	0.929	0.92366	1.3727
4.1649	2.363	1.9762	1.5742	1.7211		2.1256	1.4424	1.299	1.1613	1.2706		1.6924	1.0765	0.93722	0.92366	1.1857
3.6	2.1992	1.8675	1.453	1.2013		1.7505	1.2622	1.1622	1.0718	0.88707		1.2431	1.0501	1.001	0.96571	1.0257
2.9364	1.9415	1.6447	1.1703	1.1134		1.4906	1.1292	1.0328	0.86311	0.82409		1.1581	0.90624	0.81985	0.67146	0.71331
3.5077	2.0854	1.7336	1.3116	1.2893		1.8101	1.249	1.1165	0.96745	0.95202		2.5441	1.8179	1.5517	1.134	0.75
2.986	1.9226	1.6236	1.1905	1.0916		1.4787	1.1246	1.0279	0.87802	0.80667		1.1673	0.92672	0.85116	0.7555	0.84542
3.3806	2.0724	1.7134	1.1905	1.1892		1.6242	1.1768	1.0621	0.87802	0.87769		1.0402	0.83832	0.76669	0.62945	0.97669
3.686	2.2734	1.9346	1.5136	1.5766		1.9468	1.4152	1.2836	1.1166	1.1633		1.6826	1.223	1.1165	1.0919	1.3889
3.6345	2.0018	1.6384	1.3116	1.2242		1.9027	1.2112	1.059	0.96745	0.90192		2.0551	1.3769	1.1628	0.96571	1.0006
3.3079	2.0127	1.6794	1.352	1.4238		1.5876	1.1488	1.0467	0.99727	1.052		1.5698	1.2529	1.1602	1.0919	1.186
3.1432	1.9719	1.6883	1.3722	1.5008		1.6059	1.1782	1.0885	1.0122	1.1088		0.99925	0.92917	0.91725	0.92366	0.89102
3.0939	1.9294	1.6254	1.2309	1.2892		1.497	1.1059	1.0152	0.90783	0.94993		1.1253	0.86123	0.78041	0.67146	1.0671
4.838	2.4637	1.8821	1.2914	1.2378		2.4111	1.4205	1.1746	0.95254	0.91455		1.7287	1.185	1.0069	0.79753	0.94902
3.1188	1.965	1.6628	1.2712	1.4275		1.5347	1.1319	1.0409	0.93764	1.0511		1.2846	0.98575	0.88486	0.7555	1.5229
3.3694	1.9703	1.6521	1.3116	1.2398		1.7574	1.197	1.0737	0.96745	0.91328		1.6178	1.1484	1.0155	0.92366	0.6602
4.2412	2.1187	1.7102	1.3722	1.5471		2.1148	1.2633	1.1023	1.0122	1.1457		1.8893	1.2353	1.0677	0.96571	0.92514
3.5523	2.0327	1.6944	1.3924	1.2305		1.7107	1.193	1.0842	1.0271	0.90891		1.6303	1.1735	1.0526	1.0078	0.96652
3.5649	1.9796	1.5782	1.1703	1.1972		1.6952	1.121	0.97614	0.86311	0.88135		1.6799	1.1097	0.95659	0.83957	1.0568
4.0696	2.2019	1.7573	1.3318	1.3151		1.9564	1.234	1.0745	0.98236	0.97014		1.82	1.2367	1.1043	1.0498	0.8498
3.1439	1.8634	1.534	1.1299	1.0027		1.5243	1.0567	0.94755	0.83331	0.74298		1.5102	1.179	1.0796	0.88161	0.68528
2.8782	1.7765	1.4985	1.1905	1.2039		1.4287	1.0256	0.93732	0.87802	0.88707		1.2319	0.97924	0.91434	0.88161	0.85268
3.2146	2.0194	1.6311	1.1097	1.1456		1.5155	1.0909	0.9662	0.81841	0.84508		1.1222	0.93219	0.85535	0.67146	0.92142
3.4263	2.1118	1.7804	1.4126	1.4964		1.7289	1.2233	1.1106	1.042	1.1042		1.3785	1.1418	1.0622	1.0078	1.3594
3.5598	1.9634	1.6111	1.2712	1.2185		1.6689	1.0962	0.98692	0.93764	0.89876		1.4695	1.0952	1.042	1.0078	0.83475
3.2465	2.0198	1.7135	1.2712	1.2641		1.626	1.1751	1.0788	0.93764	0.93455		1.6413	1.1209	0.98378	0.79753	0.83243
3.1777	1.9926	1.6463	1.2107	1.099		1.5233	1.1283	1.0156	0.89292	0.81126		1.3622	1.1573	1.0946	1.0078	0.9303
3.0121	2.0079	1.6575	1.1299	1.038		1.4063	1.0864	0.9819	0.83331	0.76625		1.5203	1.3295	1.248	1.0078	0.81856
3.0591	1.9922	1.663	1.2107	1.1552		1.454	1.1007	1.0052	0.89292	0.8516		1.4992	1.2532	1.1726	1.0078	0.67713
3.2665	2.1665	1.7915	1.2712	1.3635		1.5356	1.1966	1.0813	0.93764	1.0071		1.5384	1.339	1.2568	1.0498	1.0608
2.522	1.7879	1.5539	1.1703	1.2574		1.2209	0.98704	0.93065	0.86311	0.92989		1.0453	0.86637	0.80296	0.67146	1.0474
3.0105	1.8935	1.5777	1.1501	1.3003		1.4744	1.0706	0.96659	0.84821	0.95853		1.2932	1.0489	0.98181	0.88161	1.2905
2.9789	1.9276	1.598	1.1501	0.98724		1.4248	1.0648	0.96197	0.84821	0.72863		1.4138	1.1648	1.0859	0.96571	0.93686
5.543	2.825	2.2247	1.6146	1.4604		2.7185	1.6897	1.4499	1.1912	1.0791		1.7979	1.2149	1.028	0.92366	0.78043
3.5228	2.142	1.7597	1.2309	1.2093		1.7255	1.2108	1.0803	0.90783	0.89357		1.473	1.1713	1.0533	0.79753	1.0351
3.3137	2.1924	1.8214	1.3116	1.3228		1.5977	1.2101	1.0932	0.96745	0.97472		1.3962	1.1896	1.1083	0.92366	0.98403
3.1199	2.0331	1.7049	1.2712	1.3513		1.5318	1.1481	1.0456	0.93764	0.99587		1.3217	1.1184	1.0311	0.83957	0.53882
2.8705	1.8796	1.5785	1.1501	1.1758		1.4387	1.0874	0.98752	0.84821	0.86903		1.1668	0.93918	0.8573	0.71348	0.78409
3.0063	1.9761	1.6677	1.2107	1.3058		1.4877	1.1285	1.0302	0.89292	0.96239		1.4773	1.1986	1.0897	0.83957	0.80935
3.2821	2.1177	1.7494	1.2107	0.97045		1.5696	1.1757	1.0567	0.89292	0.71572		1.6761	1.3471	1.2283	0.96571	0.57835
3.0091	2.0835	1.7801	1.3318	1.1651		1.4493	1.1784	1.0989	0.98236	0.85831		1.6083	1.3667	1.2704	1.0498	1.1139
3.6603	2.1758	1.7842	1.3318	1.0644		1.8042	1.2544	1.1163	0.98236	0.78466		1.4971	1.2511	1.1721	1.0498	0.63349
3.6385	2.3229	1.9172	1.3722	1.6658		1.7646	1.302	1.1725	1.0122	1.2268		1.3733	1.1555	1.0948	1.0078	1.1844
3.5178	2.2718	1.8167	1.1905	1.1573		1.6475	1.2168	1.0697	0.87802	0.85284		1.5949	1.2729	1.1457	0.88161	0.97467
3.8661	2.3333	1.8466	1.3116	1.2121		1.792	1.2708	1.1087	0.96745	0.89431		1.7621	1.4325	1.313	1.0919	1.0893
3.522	2.2056	1.7701	1.1905	1.5272		1.7248	1.2196	1.0611	0.87802	1.125		1.9398	1.5482	1.4096	1.0919	0.89602
3.3353	2.1369	1.7537	1.2712	1.2491		1.5993	1.198	1.073	0.93764	0.92084		1.6867	1.4033	1.2963	1.0919	0.92739
3.5915	2.1973	1.7774	1.3116	1.1714		1.815	1.2679	1.1076	0.96745	0.86312		1.9433	1.5684	1.4332	1.1761	0.74115
3.0123	1.9674	1.6408	1.1905	1.1019		1.4618	1.1107	1.0093	0.87802	0.81055		1.4975	1.234	1.1398	0.92366	0.74514
3.3424	2.1629	1.7755	1.2712	1.1693		1.6144	1.2212	1.0973	0.93764	0.86547		1.5289	1.2781	1.1842	0.96571	0.47853
3.7626	2.133	1.7002	1.3116	1.4889		1.8479	1.2224	1.0597	0.96745	1.0994		1.8163	1.3884	1.2496	1.0919	1.1232
3.1223	1.9397	1.604	1.2309	0.95456		1.531	1.1102	1.0013	0.90783	0.70349		1.408	1.0777	0.98028	0.88161	0.77864
3.6448	2.3035	1.9352	1.4934	1.5448		1.7546	1.3071	1.1983	1.1017	1.1384		1.7352	1.3152	1.1967	1.134	1.0506
3.7281	2.3219	1.9328	1.453	1.6262		1.7991	1.3205	1.1962	1.0718	1.2022		1.5127	1.2053	1.105	1.0078	1.0258
3.8653	2.3199	1.9216	1.453	1.555		1.9385	1.3409	1.202	1.0718	1.1492		1.5396	1.1895	1.0963	1.0078	1.5705
3.5676	2.2322	1.8957	1.4934	1.5862		1.7385	1.2868	1.189	1.1017	1.1713		1.6832	1.3191	1.2051	1.0498	1.2797
2.9178	1.8387	1.5516	1.1905	1.0057		1.4151	1.0454	0.96328	0.87802	0.74018		1.0833	0.86003	0.78915	0.67146	0.92669
3.6182	2.1868	1.8095	1.453	1.349		1.7554	1.2387	1.118	1.0718	0.99415		1.3938	1.1265	1.0355	0.92366	1.2206
4.2432	2.3616	1.8601	1.3924	1.4244		2.0557	1.3295	1.1428	1.0271	1.0512		1.9666	1.4875	1.3517	1.2182	0.96644
4.0257	2.2191	1.7541	1.2107	1.1215		1.9088	1.269	1.1008	0.89292	0.82801		1.4995	1.146	1.0178	0.79753	1.005
2.6194	1.6888	1.4389	1.0693	1.1616		1.3198	0.98159	0.9002	0.78861	0.85793		1.0495	0.83164	0.7579	0.62945	0.92834
3.342	2.0118	1.6143	1.1299	0.98936		1.6338	1.131	0.98635	0.83331	0.73125		1.6605	1.3329	1.2005	0.92366	0.98901
3.36	2.0826	1.6575	1.1703	1.2132		1.6054	1.1319	0.98683	0.86311	0.89582		1.4497	1.2838	1.216	1.0078	0.52292
3.1871	1.8324	1.4748	1.1501	1.1115		1.5017	1.0301	0.91292	0.84821	0.82117		1.6692	1.3908	1.3047	1.134	0.66735
3.2612	1.8739	1.4903	1.029	1.1263		1.5427	1.0407	0.90846	0.75881	0.8295		1.5264	1.1263	0.99945	0.79753	1.3639
2.8241	1.7332	1.4542	1.1299	1.3214		1.4088	1.0174	0.92093	0.83331	0.9755		1.6997	1.2474	1.1064	0.92366	1.0101
2.2456	1.5179	1.2991	1.0492	1.203		1.0916	0.88581	0.82687	0.77371	0.88803		1.2493	1.128	1.0655	0.92366	0.74609
3.0524	1.9524	1.6393	1.2914	1.3025		1.4398	1.1047	1.0173	0.95254	0.96136		1.5297	1.2654	1.1825	1.0919	1.0477
3.8015	2.29	1.8312	1.2511	1.2116		1.7671	1.293	1.1374	0.92273	0.89541		1.8603	1.4947	1.3699	1.134	0.72183
3.5806	2.2457	1.8383	1.2511	1.3329		1.6687	1.2385	1.1094	0.92273	0.97981		1.4534	1.2845	1.2172	1.0919	1.1207
3.6085	2.3843	1.9576	1.2712	1.155		1.6659	1.2654	1.1397	0.93764	0.85411		1.4424	1.2094	1.1242	0.92366	1.185
3.5097	2.1904	1.8179	1.2914	1.2254		1.6642	1.2255	1.1068	0.95254	0.90516		1.4443	1.1797	1.1037	0.96571	0.68975
4.158	2.4196	1.972	1.5136	1.4619		1.9882	1.409	1.2569	1.1166	1.079		2.0129	1.4477	1.2616	1.0919	1.009
3.5757	2.4136	2.0101	1.4126	1.3655		1.695	1.3235	1.2054	1.042	1.0092		1.3896	1.135	1.0388	0.83957	0.83
3.5497	2.3742	2.0033	1.4126	1.5001		1.745	1.3524	1.2343	1.042	1.1064		1.3177	1.075	0.99872	0.88161	1.0103
3.1392	2.1013	1.7884	1.2712	1.0501		1.537	1.2121	1.12	0.93764	0.77285		1.3437	1.1294	1.0589	0.92366	0.5334
3.3241	2.173	1.8254	1.3116	0.95549		1.6343	1.2186	1.1049	0.96745	0.7055		1.5243	1.2262	1.1414	1.0078	0.53911
3.157	2.0652	1.7393	1.2107	1.1424		1.5001	1.1587	1.0647	0.89292	0.84316		1.3423	1.0863	1.0012	0.83957	1.0431
2.9974	2.0697	1.7887	1.3924	1.4763		1.4872	1.1828	1.1059	1.0271	1.0935		1.4815	1.2298	1.1763	1.134	0.93357
3.8426	2.2152	1.8349	1.3722	1.3917		1.7561	1.2194	1.1107	1.0122	1.0279		1.4033	1.0268	0.97228	0.96571	1.1642
3.1225	1.9854	1.6926	1.3318	1.6716		1.5275	1.1389	1.0541	0.98236	1.23		1.5731	1.2406	1.1634	1.134	1.7858
3.0911	2.0044	1.689	1.2309	0.98209		1.4964	1.1319	1.034	0.90783	0.72442		1.1587	0.9355	0.8712	0.79753	0.73431
3.3471	2.1159	1.7979	1.4328	1.4879		1.5513	1.1697	1.0919	1.0569	1.098		1.8755	1.2421	1.1459	1.134	0.95124
3.5228	2.2173	1.7966	1.1703	1.1605		1.6358	1.1894	1.0563	0.86311	0.85754		1.4042	1.1106	1.0249	0.88161	0.66883
3.6	2.2762	1.8915	1.4328	1.5475		1.641	1.2297	1.131	1.0569	1.1406		1.7908	1.4458	1.3557	1.1761	1.4628
4.4018	2.5153	2.0515	1.5944	1.536		2.1299	1.4709	1.3073	1.1762	1.1353		1.5725	1.2049	1.0839	1.0078	1.0674
3.6895	2.2114	1.8187	1.352	1.5238		1.7829	1.2605	1.1326	0.99727	1.1217		1.9969	1.5106	1.3663	1.134	1.5242
3.3644	2.2867	1.9054	1.2712	1.0343		1.5778	1.2311	1.1198	0.93764	0.76302		1.5979	1.3581	1.2674	1.0078	0.60822
3.2909	2.1138	1.7392	1.2712	1.5595		1.6315	1.2162	1.0847	0.93764	1.1556		1.6453	1.3617	1.2436	0.96571	1.2657
4.5215	2.4159	1.9245	1.4328	1.6132		2.1627	1.4033	1.2195	1.0569	1.189		1.7707	1.1806	1.0326	0.96571	0.74455
5.6803	2.8269	2.1171	1.453	1.4844		2.5689	1.5456	1.2787	1.0718	1.0952		1.6632	1.1495	1.0533	1.134	0.81059
4.4838	2.4052	1.9181	1.453	1.5915		2.189	1.4135	1.229	1.0718	1.1758		2.2341	1.439	1.2099	1.0078	1.2922
4.3623	2.2395	1.7922	1.352	1.2522		2.1991	1.3523	1.1675	0.99727	0.92572		0.95653	0.7365	0.67856	0.67146	0.84505
4.3207	2.2829	1.8386	1.4732	1.3922		2.2892	1.4413	1.2375	1.0867	1.0259		2.6835	1.8655	1.552	1.134	0.82812
4.0214	2.3427	1.9592	1.4934	1.5902		1.9958	1.3656	1.2289	1.1017	1.1734		1.8358	1.3678	1.2959	1.3024	1.1183
4.2442	2.3991	1.9598	1.4732	1.309		2.1539	1.4081	1.2418	1.0867	0.96552		1.8607	1.3883	1.2729	1.134	0.92014
3.5332	2.124	1.7524	1.2309	1.2669		1.6728	1.1981	1.0796	0.90783	0.93529		1.2959	1.0879	1.0174	0.88161	0.98567
3.3177	1.8432	1.502	1.1703	0.95927		1.6064	1.0541	0.93584	0.86311	0.70884		1.6247	1.1099	1.0191	0.92366	0.73156
2.7156	1.8142	1.5318	1.1501	1.0113		1.2927	0.98893	0.91096	0.84821	0.74443		1.4455	1.1494	1.0682	0.96571	0.87278
3.1911	1.9885	1.574	1.0492	1.2519		1.5084	1.0814	0.94132	0.77371	0.92402		1.0648	0.90447	0.84611	0.71348	1.1
3.2783	1.924	1.6113	1.2914	1.3376		1.6232	1.122	1.0158	0.95254	0.99015		1.1894	0.89305	0.79106	0.67146	1.2328
3.4405	1.9788	1.6363	1.2914	1.274		1.753	1.1839	1.0553	0.95254	0.939		1.0251	0.85489	0.82135	0.83957	0.77656
3.9183	2.3823	1.9678	1.2914	1.4218		1.7876	1.2929	1.1647	0.95254	1.0498		1.6583	1.1737	1.0665	0.96571	0.73461
3.8481	2.3054	1.9472	1.5338	1.7798		1.8406	1.3053	1.1975	1.1315	1.3121		2.3148	1.4883	1.3397	1.3024	1.3565
3.4093	2.1293	1.7693	1.2712	1.2574		1.6195	1.1952	1.083	0.93764	0.9277		1.4038	1.1151	1.0322	0.88161	1.058
3.4877	2.1651	1.8176	1.3318	1.2527		1.6322	1.2064	1.1043	0.98236	0.92568		1.7738	1.352	1.2853	1.2182	0.9836
3.4176	2.253	1.8994	1.2914	1.3089		1.5767	1.2108	1.114	0.95254	0.96559		1.2454	1.0223	0.97612	0.92366	0.93799
3.6261	2.3139	1.921	1.2914	1.4815		1.6758	1.249	1.1328	0.95254	1.0932		1.537	1.291	1.2618	1.2182	1.5604
4.508	2.531	2.0271	1.3722	1.4885		2.0941	1.4109	1.2288	1.0122	1.0997		1.9755	1.379	1.2415	1.134	1.1323
3.4276	2.1832	1.8682	1.4126	1.2833		1.5793	1.203	1.1268	1.042	0.94634		1.7401	1.4172	1.381	1.3445	0.77812
4.0576	2.2819	1.8448	1.2511	1.2834		1.8771	1.2884	1.14	0.92273	0.94666		1.774	1.2066	1.0909	0.96571	1.1677
3.4509	2.2661	1.8946	1.2914	1.4524		1.5709	1.2122	1.1094	0.95254	1.0705		1.2072	1.0275	0.98763	0.92366	1.1007
3.2052	2.0846	1.7419	1.2107	1.088		1.4684	1.1457	1.0489	0.89292	0.80551		1.2881	1.0063	0.95235	0.92366	0.56095
3.5614	2.1671	1.7755	1.2511	1.337		1.6123	1.1965	1.0767	0.92273	0.98356		1.2136	1.0274	0.99254	0.92366	1.2636
3.495	2.2323	1.8397	1.2309	1.3443		1.5667	1.1993	1.0856	0.90783	0.99162		1.3052	1.0411	0.96647	0.83957	0.64438
3.7218	2.3091	1.9097	1.2511	1.331		1.7601	1.2558	1.1275	0.92273	0.98216		1.9659	1.3345	1.179	0.96571	1.0587
4.2901	2.4371	1.9681	1.3318	1.4002		2.0598	1.3834	1.2123	0.98236	1.0343		2.5565	1.6732	1.4301	1.0919	1.0094
4.664	2.5608	2.0423	1.3722	1.3208		2.1716	1.4318	1.2474	1.0122	0.97452		2.7848	1.7114	1.4606	1.1761	0.6501
3.8496	2.1226	1.7009	1.1905	1.3504		1.7792	1.1946	1.0493	0.87802	0.99825		1.7719	1.1339	1.0244	0.92366	0.85404
2.9843	2.0133	1.7341	1.3116	1.3347		1.4291	1.1379	1.0673	0.96745	0.98509		1.4315	1.177	1.1239	1.0498	1.0846
4.9129	2.4862	1.898	1.2511	1.33		2.2334	1.3998	1.175	0.92273	0.98122		2.7798	1.2678	1.0281	0.92366	0.8518
3.8396	2.3824	2.0057	1.4732	1.3989		1.8621	1.3738	1.2484	1.0867	1.03		2.338	1.7676	1.632	1.4287	1.0214
4.5636	2.5351	1.9901	1.2511	1.2719		2.0396	1.3747	1.1889	0.92273	0.93987		1.4498	1.0162	0.93166	0.88161	0.89827
3.2422	2.0392	1.6898	1.1501	1.1502		1.5507	1.1479	1.0328	0.84821	0.84882		1.2947	0.97723	0.87767	0.71348	0.93752
3.1348	2.0826	1.7868	1.3116	1.4222		1.4879	1.1528	1.0742	0.96745	1.0521		1.4849	1.1657	1.1111	1.0498	1.0439
2.9473	1.9577	1.6896	1.2712	1.1454		1.3993	1.098	1.0306	0.93764	0.84523		1.0542	0.93015	0.9261	0.92366	0.67037
2.7588	1.8993	1.6558	1.2511	1.2168		1.311	1.0678	1.0129	0.92273	0.89903		1.2495	1.071	1.025	0.92366	1.0104
3.7637	2.2761	1.8892	1.3722	1.3061		1.7708	1.251	1.1308	1.0122	0.96285		1.6427	1.1145	0.98367	0.83957	1.7322
4.294	2.4531	1.9688	1.3722	1.4353		1.9406	1.3366	1.1825	1.0122	1.0606		1.6624	1.2702	1.1637	0.96571	1.1244
3.5654	2.2374	1.8704	1.3924	1.2501		1.6596	1.2355	1.1293	1.0271	0.92384		1.9046	1.481	1.359	1.1761	0.60822
3.245	2.0746	1.7315	1.2712	1.3807		1.578	1.1679	1.0567	0.93764	1.0173		1.4555	1.2856	1.2177	1.0498	1.0793
3.218	2.1122	1.7883	1.3318	1.4133		1.5809	1.1904	1.0938	0.98236	1.0419		1.442	1.2479	1.1738	0.96571	0.96351
3.6291	2.2256	1.8194	1.3116	1.1957		1.6964	1.2209	1.0955	0.96745	0.88185		1.4026	1.1901	1.1194	0.96571	0.83823
4.15	2.2649	1.7943	1.2712	1.3991		1.9331	1.2526	1.0913	0.93764	1.0333		1.4507	1.1767	1.0767	0.88161	0.87206
3.6619	2.1179	1.7677	1.352	1.207		1.7561	1.2048	1.0945	0.99727	0.89183		1.6012	1.2466	1.1559	1.0078	0.71272
2.8984	1.9982	1.6832	1.1703	1.0444		1.363	1.083	1.0013	0.86311	0.76995		1.2639	1.0575	0.97853	0.7555	0.72495
3.5406	2.2145	1.8505	1.3318	1.312		1.6694	1.2285	1.1207	0.98236	0.96848		1.671	1.3613	1.2882	1.134	0.81554
3.8653	2.2877	1.8802	1.3318	1.2664		1.8484	1.2785	1.1424	0.98236	0.93502		1.4729	1.1723	1.0939	0.96571	0.75703
3.1543	2.0381	1.7303	1.2511	1.2634		1.5226	1.1732	1.08	0.92273	0.9322		1.7307	1.2976	1.1725	0.96571	0.93002
3.8854	2.3114	1.8772	1.3318	1.4134		1.8667	1.3096	1.1599	0.98236	1.0468		1.6018	1.2815	1.1778	1.0078	1.0359
3.8128	2.3506	1.9633	1.4934	1.5862		1.8156	1.3023	1.1886	1.1017	1.172		1.5568	1.2571	1.17	1.0078	0.91245
3.4153	2.1603	1.8021	1.2511	1.2655		1.6859	1.2288	1.1064	0.92273	0.93273		1.4036	1.1212	1.0344	0.83957	0.68829
4.1776	2.431	1.9486	1.2712	1.3119		1.9671	1.3594	1.1885	0.93764	0.96566		1.5585	1.2776	1.1766	0.96571	1.0082
3.7116	2.1302	1.7255	1.2511	1.5251		1.7272	1.1999	1.0682	0.92273	1.1251		1.5656	1.2305	1.1197	0.92366	0.98599
3.3674	2.2111	1.8354	1.2712	1.0925		1.6073	1.1888	1.0752	0.93764	0.80664		1.5681	1.2553	1.1463	0.88161	0.50714
3.6143	2.3053	1.875	1.2107	1.2639		1.6972	1.2341	1.0968	0.89292	0.93253		1.6704	1.2251	1.0739	0.79753	0.56202
3.7628	2.3029	1.8698	1.3318	1.263		1.8266	1.2785	1.1307	0.98236	0.93176		1.8237	1.4383	1.3124	1.0919	0.882
3.4769	2.2807	1.8922	1.3116	1.22		1.6454	1.2229	1.1031	0.96745	0.90041		1.4248	1.2143	1.1347	0.92366	0.62862
3.6436	2.1684	1.7727	1.2107	1.1143		1.7547	1.2256	1.0873	0.89292	0.82217		1.6565	1.3082	1.1813	0.92366	0.87768
4.2787	2.4496	1.9371	1.3116	1.3104		2.0115	1.3166	1.142	0.96745	0.96786		1.8695	1.3968	1.2387	0.92366	0.99051
3.1518	2.1354	1.7912	1.2914	1.0711		1.5305	1.1768	1.0721	0.95254	0.79117		1.581	1.2913	1.1855	0.92366	0.67651
3.5285	2.1426	1.7256	1.1703	1.2665		1.6945	1.1796	1.0361	0.86311	0.93421		1.944	1.5105	1.3506	1.0078	1.0407
4.0337	2.2356	1.8146	1.3722	1.532		1.8841	1.2787	1.1338	1.0122	1.1312		2.0496	1.2917	1.1533	1.0498	1.2667
3.1512	1.9759	1.6918	1.2914	1.2462		1.5029	1.1041	1.0292	0.95254	0.91924		0.95983	0.73634	0.68474	0.62945	1.1257
2.7961	1.9008	1.6078	1.1097	1.0834		1.3317	1.0336	0.9525	0.81841	0.7994		1.2142	0.92162	0.82457	0.62945	0.83029
3.0629	1.9922	1.6778	1.2309	1.4617		1.4445	1.1064	1.0175	0.90783	1.0776		1.2334	0.97089	0.90954	0.83957	1.3423
3.511	2.124	1.8017	1.4328	1.4027		1.7492	1.2389	1.1354	1.0569	1.0341		1.4459	1.1497	1.1163	1.1761	0.89784
3.6555	2.1942	1.7888	1.2712	1.1238		1.7411	1.2063	1.0729	0.93764	0.82905		1.6382	1.285	1.1764	0.96571	0.66069
4.5602	2.5953	2.0403	1.453	1.4981		2.2181	1.4461	1.2392	1.0718	1.107		2.0029	1.5896	1.4449	1.1761	1.0583
3.5769	2.1867	1.758	1.2107	1.1314		1.6806	1.1733	1.035	0.89292	0.83419		1.6194	1.239	1.115	0.88161	0.85917
4.2011	2.6396	2.095	1.1905	1.2554		2.0105	1.4118	1.2118	0.87802	0.9277		2.1823	1.7761	1.6302	1.3024	0.86421
3.9964	2.3074	1.7997	1.2107	1.1794		1.9349	1.2973	1.1007	0.89292	0.86967		2.2269	1.7219	1.5473	1.1761	0.81418
4.8144	2.2841	1.8225	1.3924	1.4701		2.341	1.3139	1.1388	1.0271	1.0858		1.2427	0.87425	0.82806	0.88161	1.0313
3.8575	2.3769	1.9379	1.3924	1.2201		1.8142	1.2892	1.1513	1.0271	0.90064		1.7905	1.4188	1.2944	1.0498	0.75141
3.4902	2.1594	1.7505	1.1703	0.96564		1.672	1.1904	1.0559	0.86311	0.71332		1.5013	1.2471	1.1462	0.88161	0.63762
3.4172	2.1641	1.7869	1.2309	1.1486		1.6681	1.2175	1.0899	0.90783	0.84731		1.8764	1.5291	1.409	1.134	1.0141
3.5285	2.197	1.855	1.453	1.5337		1.6952	1.265	1.169	1.0718	1.1328		1.3798	1.1488	1.0772	1.0078	0.79538
3.2487	2.2041	1.8611	1.3116	1.6346		1.5195	1.2026	1.1131	0.96745	1.2081		1.3113	1.1242	1.0502	0.83957	1.1845
3.9167	2.2779	1.8771	1.4328	1.4393		1.9172	1.3283	1.1951	1.0569	1.0623		1.6592	1.2531	1.142	0.96571	1.3253
4.1547	2.3987	1.9207	1.3116	1.5282		1.9453	1.3794	1.2101	0.96745	1.1286		1.6545	1.2491	1.1157	0.92366	0.93214
3.4696	2.2157	1.8682	1.3116	1.3367		1.7087	1.2999	1.1844	0.96745	0.98757		1.3415	0.94919	0.8498	0.7555	1.2161
3.8233	2.0784	1.6462	1.2107	0.94902		1.9341	1.257	1.0781	0.89292	0.7		1.1732	0.86075	0.76992	0.71348	0.98721
3.7299	2.3974	1.9999	1.4328	1.6651		1.7042	1.2998	1.1881	1.0569	1.2283		1.4759	1.3392	1.3131	1.2603	1.7425
3.6035	2.0176	1.5985	1.1703	1.2299		1.8227	1.193	1.0246	0.86311	0.90641		1.2745	1.0176	0.92759	0.7555	1.0542
3.4422	1.9491	1.5677	1.1703	1.0221		1.7629	1.1542	0.99778	0.86311	0.75624		1.393	1.1382	1.0709	1.0078	0.80885
3.9084	2.3852	1.9101	1.3116	1.1801		1.8693	1.3251	1.1601	0.96745	0.87182		1.9434	1.5757	1.4343	1.134	0.86827
3.9325	2.5371	2.0642	1.4126	1.3837		1.8391	1.3746	1.2232	1.042	1.0195		2.08	1.7553	1.6435	1.4708	1.1764
3.6578	2.3424	1.9546	1.4328	1.3571		1.783	1.3243	1.1986	1.0569	1.0027		1.5786	1.3509	1.2607	1.0919	0.63887
3.7038	2.4503	2.061	1.5136	1.5935		1.7849	1.382	1.266	1.1166	1.1765		1.7937	1.5582	1.4771	1.2603	1.3339
3.7456	2.4438	2.0559	1.5136	1.6946		1.9038	1.4261	1.2912	1.1166	1.2508		1.9139	1.5898	1.455	1.1761	1.0691
4.4699	2.4759	1.9871	1.3722	1.4758		2.005	1.3365	1.182	1.0122	1.0902		2.6902	1.6002	1.3798	1.134	0.96632
4.0742	2.2043	1.7658	1.3318	1.2276		1.9767	1.2861	1.1209	0.98236	0.90641		1.3461	0.99752	0.90692	0.88161	0.94341
4.5481	2.329	1.8458	1.4328	1.3754		2.2669	1.4071	1.2074	1.0569	1.0153		1.764	1.2183	1.0354	0.83957	0.82479
3.8135	2.2915	1.8301	1.2511	1.256		1.7439	1.2351	1.0867	0.92273	0.92404		1.5265	1.3013	1.206	1.0498	0.6276
4.1017	2.2659	1.7768	1.2712	1.3457		1.995	1.3541	1.1566	0.93764	0.99143		1.5471	1.2726	1.1872	1.0498	0.97536
3.6375	2.3332	1.9078	1.2511	1.2196		1.6757	1.2406	1.1109	0.92273	0.89894		1.4486	1.2157	1.1309	0.92366	0.98924
3.5642	2.3794	1.9906	1.3116	1.4333		1.6703	1.2896	1.1738	0.96745	1.0581		1.5127	1.2771	1.2071	1.0498	0.90338
4.8971	2.857	2.3143	1.5944	1.5268		2.2685	1.5518	1.3762	1.1762	1.1283		2.0713	1.5021	1.3537	1.134	0.91952
4.059	2.5892	2.1664	1.5136	1.6832		1.9332	1.4525	1.3201	1.1166	1.2419		2.1802	1.5869	1.442	1.2603	1.4679
3.7684	2.3953	2.0375	1.5944	1.4701		1.8623	1.3862	1.2724	1.1762	1.0837		2.118	1.4953	1.3314	1.2182	0.89161
4.2018	2.5548	2.0698	1.3924	1.3197		1.9433	1.4012	1.2413	1.0271	0.97578		1.2495	0.95352	0.89636	0.83957	0.71253
4.5462	2.5939	2.0608	1.3722	1.2083		2.062	1.4183	1.2355	1.0122	0.8908		1.8709	1.1973	1.0548	0.96571	0.75085
3.705	2.3714	1.9836	1.3924	1.4489		1.7241	1.3084	1.1949	1.0271	1.0697		2.1168	1.5657	1.4338	1.2603	1.2223
3.827	2.2982	1.9001	1.3722	1.5502		1.7655	1.2908	1.1707	1.0122	1.1473		1.9233	1.3987	1.2418	1.0078	0.72784
3.9518	2.4312	2.0174	1.453	1.4177		1.8387	1.347	1.222	1.0718	1.0469		2.2088	1.5324	1.3516	1.134	0.92204
4.0165	2.4345	2.0004	1.4126	1.4339		1.8876	1.3629	1.2224	1.042	1.0565		1.8834	1.2636	1.1371	1.0919	1.0126
4.0481	2.4256	1.9695	1.352	1.1399		1.8509	1.3447	1.1989	0.99727	0.84262		2.0189	1.4695	1.3069	1.0919	0.44711
3.7454	2.4756	2.0531	1.3116	1.4088		1.7024	1.3202	1.1987	0.96745	1.0412		1.2791	1.1209	1.0689	0.92366	1.3427
3.9328	2.4371	1.9753	1.2511	1.1523		1.8315	1.3427	1.1908	0.92273	0.85043		1.2978	1.0996	1.0427	0.92366	1.2442
4.2115	2.4602	2.0184	1.4934	1.5805		1.8941	1.3534	1.224	1.1017	1.1667		2.1242	1.5303	1.3759	1.1761	1.1429
4.0809	2.5328	2.1199	1.4934	1.4804		1.9151	1.4053	1.2817	1.1017	1.0936		1.7843	1.337	1.2238	1.0919	1.1935
3.4007	2.3636	2.0105	1.3318	1.1968		1.5942	1.31	1.2147	0.98236	0.88455		1.2318	1.0603	1.0136	0.92366	0.92593
4.3547	2.6158	2.1082	1.3722	1.3722		2.0025	1.4271	1.2577	1.0122	1.0147		1.5963	1.2287	1.1094	0.92366	0.86658
4.1576	2.5343	2.0761	1.3924	1.2753		1.9867	1.4233	1.2635	1.0271	0.9416		1.6484	1.0463	0.91163	0.79753	1.142
3.9121	2.5112	2.099	1.4126	1.4262		1.8698	1.3955	1.2642	1.042	1.0527		1.7423	1.2717	1.1712	1.0498	1.3762
3.8934	2.5015	2.0887	1.3924	1.7371		1.8074	1.3923	1.2679	1.0271	1.2832		1.6072	1.1351	1.021	0.88161	1.7677
3.8326	2.4695	2.09	1.4934	1.4224		1.7846	1.3594	1.2526	1.1017	1.0494		1.5124	1.2128	1.1485	1.0498	0.69676
3.801	2.4817	2.0841	1.4732	1.6016		1.7253	1.3374	1.229	1.0867	1.1816		1.6184	1.2118	1.0975	0.92366	1.1998
4.141	2.4812	2.0541	1.5338	1.2687		1.9734	1.4021	1.2625	1.1315	0.93602		2.1557	1.4232	1.2423	1.0919	0.70109
4.2602	2.5509	2.0737	1.4328	1.1641		2.0122	1.428	1.264	1.0569	0.86113		1.9146	1.4847	1.3489	1.134	0.62714
3.8649	2.4303	2.0061	1.352	1.4538		1.8554	1.3826	1.2381	0.99727	1.0717		1.6182	1.2708	1.1711	1.0078	1.5431
3.8348	2.4994	2.0684	1.4328	1.2829		1.7448	1.3578	1.2327	1.0569	0.9454		1.8894	1.5989	1.5037	1.3445	0.69892
4.2374	2.4997	2.0381	1.453	1.4292		2.0179	1.4194	1.2627	1.0718	1.0553		2.0904	1.5231	1.3534	1.134	0.85864
3.8056	2.4811	2.1036	1.453	1.4377		1.7637	1.3524	1.2526	1.0718	1.0623		1.4983	1.1847	1.1114	0.96571	1.2817
3.3493	2.2035	1.9026	1.453	1.2615		1.657	1.285	1.1949	1.0718	0.93188		1.7841	1.28	1.1659	1.0919	1.158
3.8057	2.3705	1.9734	1.3924	1.3984		1.7858	1.3244	1.2052	1.0271	1.0302		1.4215	1.081	0.98805	0.79753	1.2506
3.481	2.2721	1.9398	1.4328	1.5098		1.6656	1.2782	1.1856	1.0569	1.1148		1.0758	0.94012	0.91928	0.92366	1.3641
3.3611	2.2258	1.8939	1.352	1.3509		1.6354	1.2525	1.1531	0.99727	0.99801		1.3644	1.0981	1.0167	0.88161	0.88993
3.8656	2.4061	2.0185	1.4732	1.6285		1.7937	1.3537	1.2416	1.0867	1.1998		1.4429	1.0942	1.0269	0.96571	1.3586
3.597	2.3581	1.9821	1.3116	1.3873		1.7041	1.2966	1.1846	0.96745	1.0276		1.3513	1.021	0.95372	0.83957	1.7224
4.1272	2.4938	2.0354	1.3924	1.2332		1.9201	1.3821	1.2346	1.0271	0.91021		1.8081	1.1249	1.0052	0.92366	0.88591
3.8696	2.4216	2.014	1.453	1.2774		1.7943	1.3482	1.2315	1.0718	0.94091		1.4953	1.2405	1.1733	1.0498	0.94616
4.0534	2.5399	2.1381	1.554	1.6198		1.9233	1.449	1.3283	1.1464	1.1979		1.8031	1.2692	1.1582	1.0919	1.1333
3.7985	2.3347	1.9251	1.3318	1.1694		1.7971	1.2975	1.1652	0.98236	0.86425		1.5549	1.2249	1.1424	1.0078	0.7152
4.0691	2.4873	2.0364	1.4126	1.6261		1.8601	1.3599	1.2201	1.042	1.2034		2.0144	1.4913	1.3795	1.2182	0.6532
4.3442	2.6308	2.1122	1.3318	1.5629		1.9779	1.4283	1.2585	0.98236	1.1541		1.981	1.4499	1.2866	1.0498	0.91826
4.1307	2.6715	2.236	1.4732	1.7676		1.9053	1.4587	1.3358	1.0867	1.3042		2.0104	1.6252	1.5192	1.3024	1.2239
4.2731	2.5956	2.1374	1.5136	1.6549		1.9736	1.4258	1.2873	1.1166	1.2222		1.8961	1.5068	1.4035	1.2182	1.6009
3.7117	2.4823	2.0774	1.3924	1.3813		1.7737	1.3873	1.2598	1.0271	1.0207		1.9401	1.5672	1.4406	1.1761	1.2366
3.8898	2.4621	2.0381	1.4934	1.5209		1.8201	1.3588	1.2291	1.1017	1.1228		1.637	1.3209	1.2435	1.2182	1.0621
4.0129	2.6141	2.2121	1.5944	1.6698		1.8427	1.4253	1.3239	1.1762	1.2351		1.5957	1.3107	1.2316	1.0498	1.0435
3.8409	2.5001	2.0691	1.352	1.2467		1.8303	1.3793	1.241	0.99727	0.92104		1.5576	1.2367	1.1475	1.0078	0.95873
4.3689	2.6605	2.1321	1.352	1.419		2.039	1.4524	1.2698	0.99727	1.05		2.0414	1.6314	1.4843	1.2182	1.3267
3.8712	2.4411	1.991	1.352	1.2234		1.8338	1.3311	1.1865	0.99727	0.90273		1.7664	1.3352	1.1796	0.88161	1.041
3.9713	2.4723	2.0012	1.3722	1.3439		1.9497	1.3832	1.2144	1.0122	0.99124		1.8368	1.5181	1.4076	1.1761	1.1547
3.518	2.2444	1.8839	1.3722	1.3336		1.652	1.252	1.1538	1.0122	0.98167		1.3663	1.0959	1.0141	0.88161	0.9701
3.5064	2.1319	1.8006	1.3924	1.3201		1.6562	1.2066	1.1109	1.0271	0.97514		1.4262	1.0253	1.0147	1.134	0.73846
3.4	1.9601	1.615	1.3116	1.3304		1.6473	1.1188	1.0072	0.96745	0.98197		1.7505	1.2127	1.0981	1.0919	1.1744
2.8685	1.9156	1.6547	1.2914	1.1641		1.4469	1.1163	1.0422	0.95254	0.85829		1.2481	0.98717	0.89749	0.7555	0.90322
3.9427	2.1117	1.7385	1.3722	1.2623		1.9917	1.2727	1.1303	1.0122	0.92795		2.5095	1.6276	1.3945	1.134	1.0331
3.4948	2.1185	1.753	1.2712	1.2408		1.6956	1.1924	1.0744	0.93764	0.91596		1.202	0.97479	0.91857	0.83957	1.1256
3.2693	2.0656	1.7294	1.2914	1.4773		1.5291	1.1499	1.0592	0.95254	1.0892		1.4739	1.1307	1.0325	0.92366	1.44
3.7045	2.2939	1.8765	1.3116	1.3868		1.7728	1.2679	1.1314	0.96745	1.0236		1.2607	1.0794	1.0099	0.83957	1.0778
3.8991	2.1389	1.7493	1.4328	1.323		1.8616	1.2302	1.1005	1.0569	0.97593		2.3209	1.5682	1.3559	1.1761	0.82513
4.0831	2.3272	1.8938	1.453	1.5391		1.9848	1.3304	1.1765	1.0718	1.1333		1.6447	1.2281	1.1068	1.0078	1.0944
3.5313	2.2414	1.8635	1.2914	1.2452		1.7013	1.2403	1.1215	0.95254	0.91754		1.0591	0.90195	0.8581	0.79753	0.98242
3.0058	2.0939	1.8313	1.3924	1.3423		1.4312	1.146	1.0864	1.0271	0.99046		1.0233	0.89986	0.87099	0.83957	0.91021
3.728	2.2661	1.8807	1.3722	1.2897		1.7332	1.2709	1.1585	1.0122	0.9538		1.2425	1.0207	0.96862	0.88161	0.64774
4.2973	2.2099	1.7771	1.352	1.2735		2.1223	1.3152	1.1442	0.99727	0.93868		1.3761	1.0024	0.90929	0.83957	0.76887
4.4799	2.6743	2.1529	1.3924	1.2751		2.0328	1.4623	1.2927	1.0271	0.94079		1.4883	1.1074	1.0201	0.92366	1.2173
3.8869	2.2496	1.8068	1.3318	1.2508		1.8765	1.2797	1.1203	0.98236	0.92227		1.4338	1.0529	0.96482	0.92366	0.84452
3.2912	2.0246	1.7088	1.3116	1.3623		1.6809	1.1827	1.0793	0.96745	1.0044		2.1602	1.3424	1.1599	0.96571	1.0149
3.0967	1.9732	1.6607	1.2309	1.3396		1.4279	1.0929	1.0083	0.90783	0.98882		1.3126	1.0281	0.95863	0.92366	1.0174
3.4929	2.133	1.7583	1.2309	1.5428		1.5871	1.1683	1.0582	0.90783	1.1387		1.1781	0.81644	0.74049	0.71348	1.264
3.3271	2.1217	1.8055	1.3318	1.4264		1.6045	1.2139	1.1214	0.98236	1.0537		1.5164	1.0081	0.90224	0.79753	1.2432
4.0075	2.6248	2.1887	1.5136	1.5261		1.9161	1.4864	1.3475	1.1166	1.1257		1.6441	1.3377	1.2486	1.0919	1.1749
4.061	2.5664	2.1334	1.4732	1.9252		1.8914	1.4304	1.2997	1.0867	1.4201		1.1819	0.97693	0.92214	0.79753	1.0025
5.0432	2.5224	1.9096	1.4126	1.2989		2.511	1.4828	1.2227	1.042	0.95906		4.2556	2.7306	2.1221	1.3445	0.96309
3.8391	2.3277	1.9294	1.4732	1.262		1.8726	1.3148	1.1841	1.0867	0.93367		1.5239	1.2445	1.1769	1.134	0.76469
4.0277	2.428	2.0413	1.6146	1.5915		1.9546	1.4014	1.2831	1.1912	1.1739		1.587	1.2086	1.1408	1.1761	1.5853
4.739	2.7975	2.2403	1.5338	1.665		2.2462	1.5698	1.3755	1.1315	1.23		2.2191	1.5721	1.4164	1.1761	1.1777
4.2709	2.7402	2.2411	1.5136	1.6658		1.9881	1.4986	1.3413	1.1166	1.2288		1.712	1.4109	1.2948	1.0498	1.2127
3.8168	2.3075	1.8973	1.4328	1.3906		1.8259	1.3042	1.1725	1.0569	1.0273		1.5741	1.2577	1.1655	1.0498	1.052
3.4959	2.2409	1.8824	1.352	1.3119		1.7463	1.3077	1.1857	0.99727	0.96804		1.4613	1.1721	1.0686	0.92366	0.90876
3.3863	2.204	1.853	1.4126	1.3468		1.6379	1.2586	1.1508	1.042	0.99427		1.5055	1.2931	1.207	1.0078	0.94503
3.0684	1.6984	1.3624	1.0088	1.0148		1.4411	0.98226	0.86258	0.74391	0.74868		1.6567	1.0276	0.88209	0.79753	0.99158
2.8489	1.8434	1.5639	1.1905	1.2439		1.4116	1.0583	0.97536	0.87802	0.91814		1.1425	0.88511	0.83935	0.83957	1.0957
3.3821	2.1238	1.8217	1.3722	1.4441		1.6605	1.2381	1.1463	1.0122	1.0642		1.3451	0.80814	0.75211	0.7555	0.81045
3.6691	2.2864	1.8775	1.3116	1.321		1.7519	1.2794	1.149	0.96745	0.97226		1.3856	1.14	1.0441	0.83957	0.76846
3.5984	2.3968	2.0198	1.453	1.311		1.7384	1.3417	1.2277	1.0718	0.96662		1.9485	1.4674	1.3417	1.2182	1.0608
3.4627	2.2769	1.9118	1.3318	1.4062		1.6756	1.301	1.1859	0.98236	1.0396		1.4002	1.1782	1.0903	0.92366	1.1563
3.7577	2.3654	2.0013	1.5136	1.764		1.7731	1.3263	1.225	1.1166	1.3053		1.3514	1.1514	1.1038	1.0498	1.3813
4.7547	2.9135	2.4074	1.6954	1.758		2.1509	1.6092	1.4568	1.2508	1.2965		2.8415	1.9265	1.7365	1.5551	1.3459
4.4135	2.7827	2.3	1.5742	1.7169		2.1399	1.6023	1.4351	1.1613	1.2701		2.1843	1.6406	1.4646	1.2182	1.0527
4.1382	2.6808	2.2489	1.5944	1.7167		1.9724	1.495	1.3627	1.1762	1.2677		2.1595	1.6896	1.5543	1.3445	1.4115
4.9124	2.9129	2.3585	1.5944	1.7502		2.2395	1.6191	1.4381	1.1762	1.2902		2.1381	1.4333	1.2772	1.1761	1.1609
4.5517	2.9045	2.4248	1.756	1.6665		2.0903	1.5773	1.4374	1.2956	1.228		2.3523	1.8011	1.6616	1.513	0.86629
4.2144	2.6443	2.198	1.5742	1.4285		2.0284	1.4973	1.352	1.1613	1.0542		2.2451	1.4845	1.3144	1.134	1.4143
4.203	2.6163	2.1915	1.5742	1.7254		2.0244	1.4914	1.3491	1.1613	1.2738		2.1901	1.5051	1.3591	1.2603	1.3152
3.6207	2.5974	2.2583	1.6752	1.8239		1.7695	1.4742	1.3863	1.2359	1.345		1.7083	1.3937	1.3009	1.2182	1.4798
4.1778	2.6715	2.2177	1.5944	1.6616		2.008	1.5241	1.3755	1.1762	1.2249		2.0807	1.4341	1.2576	1.134	0.70942
4.4787	2.7911	2.3121	1.554	1.4271		2.1232	1.5623	1.4055	1.1464	1.0552		1.9983	1.4173	1.2842	1.0919	0.6928
4.4967	2.7463	2.254	1.5944	1.489		2.0602	1.5061	1.358	1.1762	1.0976		1.8463	1.3391	1.1992	1.0498	0.86213
4.3544	2.6735	2.1764	1.4328	1.2842		2.003	1.4532	1.3002	1.0569	0.94885		1.5641	1.2354	1.1431	0.96571	0.71515
3.9648	2.5806	2.1953	1.5742	1.4059		1.913	1.4709	1.358	1.1613	1.0361		1.8011	1.4872	1.4117	1.2603	0.88263
4.8184	2.8927	2.3646	1.6752	1.6454		2.2487	1.6113	1.4421	1.2359	1.2137		1.8338	1.4699	1.3517	1.1761	0.92912
4.7911	3.0202	2.4802	1.6954	1.6213		2.1904	1.648	1.484	1.2508	1.1953		1.9262	1.3115	1.1778	1.0498	1.0241
4.3074	2.7806	2.3472	1.6146	1.6696		2.0027	1.5293	1.4065	1.1912	1.2328		1.751	1.4433	1.3782	1.2182	1.1946
5.0804	3.0251	2.4343	1.554	1.6506		2.3408	1.6423	1.4451	1.1464	1.2165		2.4816	1.7027	1.4788	1.1761	1.1646
4.692	2.9228	2.3916	1.6146	1.498		2.1113	1.5667	1.4089	1.1912	1.1039		2.2984	1.6062	1.4313	1.1761	1.128
4.4905	2.7337	2.2465	1.5338	1.4802		2.1001	1.5414	1.382	1.1315	1.0916		1.9871	1.2951	1.1475	1.0078	1.2738
4.2347	2.7231	2.224	1.3722	1.2358		1.9642	1.468	1.3073	1.0122	0.9122		1.6249	1.2162	1.0992	0.92366	0.93858
4.281	2.7645	2.2818	1.554	1.4995		1.9684	1.527	1.3803	1.1464	1.1061		1.649	1.405	1.3428	1.2182	0.76378
4.2761	2.6707	2.1999	1.4934	1.5673		1.9956	1.4914	1.344	1.1017	1.1549		1.7959	1.208	1.0511	0.88161	1.4194
4.5461	2.8291	2.3334	1.554	1.5177		2.0679	1.5396	1.3907	1.1464	1.1204		1.4839	1.1273	1.0344	0.88161	1.2008
4.569	2.7611	2.2596	1.4732	1.5706		2.0842	1.4759	1.3217	1.0867	1.1595		1.2459	0.86331	0.77754	0.67146	0.5149
4.3551	2.7152	2.2455	1.6146	1.5919		2.042	1.5043	1.3568	1.1912	1.175		2.4539	1.7917	1.6271	1.4287	1.4342
4.0407	2.6788	2.2649	1.6146	1.3799		1.9265	1.4996	1.3759	1.1912	1.0178		2.0956	1.7884	1.7109	1.5551	1.2179
3.9639	2.4534	2.026	1.352	1.405		1.8751	1.3955	1.256	0.99727	1.0388		1.5946	1.2732	1.1844	1.0078	0.966
4.2626	1.9962	1.4881	1.0895	1.1174		2.209	1.2073	0.97226	0.80351	0.8239		2.3413	1.5851	1.2674	0.79753	0.67452
2.3511	1.4923	1.2485	1.0088	1.1725		1.1753	0.8599	0.77816	0.74391	0.86447		1.0625	0.92684	0.87435	0.79753	0.87416
4.4014	2.399	1.866	1.3722	1.195		2.0959	1.2987	1.1072	1.0122	0.88243		1.7514	1.3214	1.2128	1.0919	0.79135
3.3038	1.9699	1.6065	1.2309	1.3138		1.6373	1.1375	1.006	0.90783	0.97258		1.5515	1.341	1.248	1.0498	1.0518
2.8312	1.6818	1.3638	1.029	0.86785		1.3075	0.92468	0.82605	0.75881	0.64091		1.6568	1.2682	1.1565	0.96571	0.37005
4.2271	2.4902	2.0127	1.4126	1.389		1.9768	1.3795	1.2211	1.042	1.0242		1.9825	1.5514	1.4137	1.1761	1.1228
3.4183	2.4224	2.0775	1.5136	1.3424		1.5923	1.3052	1.2228	1.1166	0.99189		1.5235	1.4014	1.3589	1.2603	0.9132
4.0577	2.5924	2.1532	1.5338	1.5265		1.9023	1.41	1.2818	1.1315	1.1268		1.769	1.5014	1.4189	1.2182	1.0877
3.7054	2.4171	2.0247	1.453	1.354		1.7471	1.3306	1.219	1.0718	0.99951		1.5516	1.3427	1.2641	1.0919	1.0808
4.3374	2.5818	2.0426	1.2712	1.2538		1.9796	1.3913	1.2086	0.93764	0.92463		1.8881	1.4855	1.3544	1.0919	1.396
4.1117	2.5395	2.0426	1.3116	1.3429		2.001	1.4183	1.2347	0.96745	0.98939		2.2004	1.6605	1.4693	1.134	0.84765
4.2166	2.4362	1.9442	1.3116	1.4947		2.0168	1.3536	1.1798	0.96745	1.1025		2.0091	1.5025	1.3371	1.0078	1.2841
3.6046	2.3912	2.0094	1.453	1.4109		1.6892	1.3033	1.1987	1.0718	1.0402		1.6968	1.4364	1.3504	1.1761	0.992
3.6335	2.3512	1.9707	1.4126	1.2805		1.785	1.3295	1.2076	1.042	0.94508		1.6602	1.3177	1.1932	0.92366	0.72985
4.306	2.4789	2.031	1.5338	1.6516		2.0612	1.3991	1.2524	1.1315	1.2208		1.7313	1.4614	1.3631	1.134	1.1002
4.1578	2.5867	2.1102	1.5136	1.5457		2.003	1.4324	1.2751	1.1166	1.1413		1.9332	1.567	1.435	1.1761	1.2519
3.6394	2.3192	1.9684	1.5136	1.3905		1.8044	1.3385	1.2277	1.1166	1.0258		1.6558	1.3582	1.2709	1.134	1.0044
3.6585	2.3343	1.9185	1.352	1.1488		1.7685	1.3053	1.1685	0.99727	0.84759		1.6559	1.3666	1.2479	0.96571	0.72093
3.8841	2.4004	1.9453	1.3924	1.0776		1.8594	1.3282	1.1766	1.0271	0.79522		2.1223	1.6903	1.5356	1.2182	0.8508
3.493	2.3418	1.9851	1.5136	1.4013		1.6982	1.3201	1.2191	1.1166	1.0336		2.1121	1.6868	1.5373	1.2182	1.2211
4.0014	2.3375	1.9033	1.4126	1.2844		1.9497	1.3249	1.1725	1.042	0.94679		1.6208	1.2597	1.1415	0.96571	1.1022
3.5958	2.3322	1.9647	1.4328	1.4106		1.7362	1.3248	1.2149	1.0569	1.0405		1.5996	1.268	1.1692	0.96571	0.8801
4.6097	2.6	2.092	1.453	1.5039		2.2432	1.4951	1.3104	1.0718	1.1101		1.5972	1.2026	1.0908	0.88161	0.75614
4.6592	2.6763	2.1348	1.5338	1.5706		2.2265	1.4957	1.3008	1.1315	1.1594		2.0236	1.5481	1.392	1.1761	1.3111
3.9187	2.6363	2.1719	1.4732	1.5354		1.9089	1.4526	1.2974	1.0867	1.1323		2.1789	1.8786	1.7521	1.3866	1.1457
3.0288	1.7465	1.4328	1.1501	1.1255		1.4876	1.0104	0.89892	0.84821	0.83033		1.4268	1.1031	1.0261	0.96571	0.97449
3.3874	2.0997	1.7256	1.2712	1.3076		1.5832	1.1385	1.0259	0.93764	0.96565		1.656	1.3491	1.2788	1.134	0.79594
3.8062	2.0442	1.6427	1.2914	1.3909		1.8774	1.1968	1.0416	0.95254	1.0253		1.1868	0.96399	0.91089	0.88161	0.48748
3.0746	1.835	1.5192	1.1501	1.0336		1.4826	1.0295	0.93167	0.84821	0.76383		1.0395	0.81609	0.73432	0.58745	0.63056
2.8363	1.7831	1.4901	1.1097	1.0279		1.3886	1.0182	0.92785	0.81841	0.76143		1.0851	0.89626	0.82629	0.67146	0.79506
3.2051	1.9206	1.5569	1.0693	1.0773		1.5805	1.1004	0.97139	0.78861	0.79374		1.0451	0.75778	0.68382	0.58745	0.54441
3.0221	1.7553	1.459	1.1097	1.1966		1.4488	1.0085	0.91624	0.81841	0.88469		1.1389	0.86867	0.81517	0.79753	1.0764
3.7437	2.0816	1.6845	1.3116	1.3068		1.8757	1.2189	1.0619	0.96745	0.96207		1.4716	1.163	1.0772	1.0498	0.97441
4.1875	2.1594	1.7399	1.3722	1.2775		2.0091	1.2529	1.1018	1.0122	0.94322		1.742	1.2185	1.1077	1.0919	0.68693
3.929	2.2239	1.8053	1.352	1.1953		1.9416	1.3264	1.1721	0.99727	0.88117		1.708	1.1437	0.98259	0.83957	1.0349
4.3064	2.4443	1.9206	1.3924	1.2958		2.0687	1.3774	1.1844	1.0271	0.95689		1.6136	1.2147	1.1134	1.0498	0.70002
2.9136	1.8317	1.5242	1.1097	0.89721		1.4051	1.018	0.9209	0.81841	0.66143		1.1784	0.9725	0.89337	0.71348	0.43142
3.3392	1.9004	1.5888	1.352	1.5059		1.6876	1.1345	1.025	0.99727	1.1115		1.4091	1.1555	1.073	1.0078	1.0394
2.5259	1.7486	1.4862	1.0895	1.3214		1.193	0.94764	0.87909	0.80351	0.97565		1.2996	1.0786	1.0181	0.88161	0.99614
3.6798	2.0548	1.6946	1.3116	1.2315		1.7892	1.1935	1.0669	0.96745	0.90676		1.3982	1.0122	0.93324	0.92366	0.95306
3.1153	1.9267	1.6485	1.352	1.4097		1.4543	1.0976	1.0263	0.99727	1.0436		1.7221	1.376	1.2923	1.1761	1.2305
4.2017	2.3935	1.9331	1.453	1.5594		1.9725	1.3532	1.2019	1.0718	1.1523		2.1157	1.5761	1.4097	1.134	1.293
4.4585	2.9167	2.3799	1.5338	1.474		2.0623	1.5538	1.3889	1.1315	1.0883		1.9382	1.5568	1.441	1.2182	1.0904
5.0177	2.4655	1.9011	1.4126	1.2695		2.2795	1.3827	1.1729	1.042	0.93703		2.2395	1.3282	1.1788	1.1761	0.93373
4.4187	2.3682	1.8771	1.4126	1.3372		2.2812	1.4339	1.2227	1.042	0.98743		1.9758	1.3789	1.2321	1.0498	0.73052
3.1798	1.6622	1.3325	1.1097	0.8824		1.4673	0.93282	0.82254	0.81841	0.65038		1.5083	1.027	0.94502	1.0078	0.56605
4.8671	3.025	2.4718	1.5742	1.8324		2.2385	1.6369	1.4625	1.1613	1.3507		2.0696	1.5298	1.3711	1.134	1.5748
4.5813	2.5504	2.0212	1.4126	1.5078		2.1926	1.4436	1.2458	1.042	1.1139		2.437	1.8431	1.632	1.2182	0.94072
3.8281	2.3438	1.8928	1.2712	1.2261		1.7521	1.2671	1.127	0.93764	0.90429		1.6103	1.2713	1.1596	0.92366	0.90363
4.6315	2.7366	2.217	1.6954	1.5671		2.2331	1.5489	1.3699	1.2508	1.1573		2.342	1.7403	1.555	1.3445	1.0814
4.4814	2.6608	2.192	1.7156	1.8025		2.164	1.5082	1.3507	1.2658	1.3313		1.8532	1.4574	1.3271	1.1761	1.1067
3.5146	2.192	1.7923	1.2511	1.5548		1.7195	1.2449	1.1033	0.92273	1.1481		1.9154	1.5442	1.4032	1.0919	1.4043
4.1941	2.5389	2.0815	1.4732	1.263		2.0002	1.4272	1.272	1.0867	0.93078		1.7608	1.1908	1.0819	0.96571	0.96596
3.0844	1.9209	1.6264	1.2914	1.336		1.5015	1.1086	1.0198	0.95254	0.9851		1.3831	1.0144	0.90537	0.83957	0.92696
3.9453	2.3985	2.008	1.5136	1.6301		1.963	1.3802	1.2513	1.1166	1.2013		1.9395	1.4459	1.3019	1.0498	1.555
3.195	2.0784	1.723	1.1905	1.1512		1.6432	1.2095	1.0753	0.87802	0.85114		1.8694	1.5886	1.4911	1.3024	0.90619
3.8147	2.2907	1.9121	1.5136	1.2604		1.8289	1.3238	1.2085	1.1166	0.93073		2.0284	1.4886	1.3555	1.2182	0.80748
4.0087	2.4373	1.9611	1.2309	1.4963		1.8516	1.3301	1.171	0.90783	1.1047		2.1806	1.6722	1.5075	1.2603	1.4625
2.81	1.6908	1.4047	1.0492	0.90493		1.3406	0.94027	0.85389	0.77371	0.66787		1.0622	0.8469	0.78635	0.67146	0.65897
3.5362	2.2738	1.9102	1.2914	1.3791		1.6396	1.2641	1.1592	0.95254	1.0204		1.229	0.9958	0.93844	0.83957	0.62454
3.8111	2.3047	1.9223	1.3924	1.5089		1.7676	1.2835	1.1735	1.0271	1.1126		1.3181	0.97861	0.90343	0.83957	1.5018
3.809	2.4616	2.03	1.352	1.5014		1.8915	1.4447	1.2907	0.99727	1.1099		1.4821	1.2449	1.1553	0.96571	1.3181
2.9658	1.9593	1.6757	1.2309	1.2943		1.4918	1.1152	1.0263	0.90783	0.95515		1.3742	1.054	0.98265	0.96571	1.0483
3.871	2.4591	2.0383	1.5136	1.4		1.8249	1.3567	1.2327	1.1166	1.0329		2.1116	1.7624	1.6374	1.4287	1.0219
3.2503	2.3032	2.0213	1.5338	1.4352		1.5757	1.2848	1.2197	1.1315	1.0609		1.4369	1.2354	1.1871	1.0919	0.57015
3.2244	2.2484	1.9567	1.4934	1.5578		1.5986	1.303	1.2243	1.1017	1.1501		1.443	1.1993	1.1016	0.92366	1.5689
3.7925	2.5065	2.0937	1.5136	1.4732		1.7856	1.3877	1.268	1.1166	1.088		1.6515	1.3566	1.2475	1.0498	1.1081
3.9479	2.5379	2.0917	1.453	1.4964		1.8515	1.4121	1.2721	1.0718	1.1044		1.6635	1.3328	1.226	1.0498	0.89296
4.2168	2.6834	2.1979	1.4934	1.6684		2.024	1.4719	1.3135	1.1017	1.23		2.0682	1.5791	1.4244	1.1761	1.2019
3.8684	2.6677	2.2292	1.4934	1.3783		1.8026	1.4232	1.2993	1.1017	1.0178		1.5885	1.3849	1.3183	1.134	0.90668
4.4804	2.7735	2.2912	1.5944	1.6018		2.0717	1.5105	1.3654	1.1762	1.1813		2.132	1.5635	1.4113	1.2182	1.0304
4.5738	2.7373	2.2439	1.4934	1.5884		2.1872	1.5639	1.3905	1.1017	1.172		1.9166	1.3608	1.2191	1.0498	0.89931
3.672	2.0947	1.7478	1.3318	1.5004		1.7982	1.2164	1.1012	0.98236	1.1085		1.3726	0.99799	0.92465	0.92366	0.82434
4.2762	2.6356	2.1485	1.6348	1.5634		2.1481	1.5313	1.3492	1.2061	1.1523		1.4799	1.2755	1.2099	1.134	0.88987
3.9702	2.0027	1.6144	1.2914	1.2522		1.8551	1.1397	1.0077	0.95254	0.92446		2.006	1.2714	1.1243	1.0498	0.93484
2.5306	1.6015	1.2908	0.88768	0.83285		1.209	0.87685	0.77289	0.65454	0.6148		1.0401	0.82784	0.75321	0.58745	0.65894
4.4309	2.6869	2.177	1.5136	1.5504		2.0164	1.4616	1.2981	1.1166	1.1443		2.0839	1.5574	1.4512	1.3866	1.2932
3.915	2.5719	2.2063	1.5742	1.6939		1.8747	1.4598	1.3583	1.1613	1.2476		1.2245	0.99311	0.94493	0.88161	1.1071
4.0203	2.6715	2.1923	1.4732	1.2768		1.9451	1.4806	1.3242	1.0867	0.94256		2.0634	1.7137	1.5803	1.2182	1.0157
3.9304	2.4053	2.0046	1.4934	1.4344		1.8666	1.3745	1.2564	1.1017	1.0603		1.9439	1.4783	1.3358	1.0919	1.0192
3.4487	2.1925	1.8319	1.3116	1.4029		1.6246	1.2275	1.1287	0.96745	1.0341		1.1327	0.90006	0.85099	0.79753	0.85957
3.6456	2.214	1.874	1.4934	1.5301		1.7398	1.2681	1.1773	1.1017	1.1284		1.668	1.1854	1.0641	0.96571	0.98983
4.7395	2.7675	2.1925	1.3722	1.2189		2.1669	1.5267	1.3235	1.0122	0.90084		1.9231	1.4425	1.3077	1.134	0.76497
4.0594	2.5798	2.1587	1.6752	1.7794		1.8559	1.4317	1.3227	1.2359	1.3134		2.0519	1.572	1.4569	1.3445	1.1558
3.98	2.5673	2.1421	1.5338	1.5117		1.9885	1.4713	1.3216	1.1315	1.1178		2.155	1.8081	1.6909	1.4708	1.1363
4.3157	2.6791	2.1996	1.453	1.4413		2.0483	1.5175	1.3562	1.0718	1.0655		2.1507	1.7612	1.6272	1.3024	1.1746
3.9862	2.573	2.1529	1.4732	1.4259		1.9255	1.4508	1.3137	1.0867	1.0512		1.9786	1.6493	1.5478	1.3866	1.0556
4.2109	2.6963	2.2139	1.4732	1.4187		2.0635	1.5437	1.3715	1.0867	1.0481		1.7853	1.549	1.4425	1.2603	1.0847
3.3995	2.2662	1.9244	1.4126	1.3273		1.669	1.2915	1.1844	1.042	0.97678		1.9921	1.5599	1.4049	1.1761	0.92357
3.5801	2.3356	1.9583	1.4328	1.4529		1.7188	1.3018	1.1839	1.0569	1.0714		2.2369	1.8235	1.7061	1.513	1.2653
3.0481	2.0578	1.7292	1.1905	1.2783		1.4196	1.1199	1.0269	0.87802	0.94372		1.111	0.97786	0.92433	0.79753	1.0407
3.6055	2.1382	1.7367	1.1905	1.2668		1.6686	1.1648	1.0339	0.87802	0.93543		1.7243	1.3353	1.2367	1.0498	0.90943
3.3984	2.0227	1.6445	1.0693	1.0479		1.5645	1.1119	0.99074	0.78861	0.77463		1.5146	1.0928	0.97287	0.79753	0.92598
3.63	2.0763	1.6981	1.2107	1.1783		1.625	1.1412	1.0278	0.89292	0.87137		1.5514	1.0768	1.0077	0.96571	1.0714
3.3272	1.9087	1.5832	1.2511	1.1978		1.5686	1.0964	0.99008	0.92273	0.88251		1.6439	1.0164	0.93311	1.0078	0.83522
3.6877	2.0999	1.7162	1.2914	1.1794		1.6866	1.1669	1.0491	0.95254	0.87075		1.6022	1.1273	1.0507	1.0078	0.84449
3.8248	2.0978	1.7136	1.3116	1.0938		1.8694	1.2126	1.0749	0.96745	0.80806		1.6694	1.1529	1.1012	1.2182	1.4959
4.189	2.2801	1.803	1.1501	1.116		1.9195	1.2603	1.0886	0.84821	0.82277		2.1325	1.2099	0.99355	0.7555	0.53003
3.9134	2.1806	1.7631	1.2511	1.1524		1.7667	1.2265	1.0889	0.92273	0.85116		1.6589	1.1467	1.0389	0.88161	0.57018
3.3015	1.9609	1.5942	1.0895	1.1964		1.5071	1.0727	0.95563	0.80351	0.88164		1.5332	1.1212	1.0202	0.88161	0.76258
5.4804	2.7335	2.0601	1.2712	1.2966		2.4869	1.5411	1.2749	0.93764	0.95794		3.9998	2.0409	1.4648	0.83957	0.9845
4.4477	2.459	1.9321	1.2712	1.3254		2.0043	1.3575	1.1782	0.93764	0.97945		2.1229	1.5114	1.3328	1.0498	0.78393
2.7836	1.8929	1.6028	1.1501	1.1582		1.2872	1.0335	0.95821	0.84821	0.85412		1.0537	0.92775	0.87337	0.7555	0.74161
3.3413	2.02	1.666	1.1703	1.0726		1.5372	1.109	1.0031	0.86311	0.78748		1.2255	0.88613	0.79295	0.67146	0.9686
3.2692	1.8899	1.4941	1.0088	1.0652		1.4781	1.0098	0.88124	0.74391	0.78713		1.5316	1.1118	0.98051	0.7555	0.6029
2.8004	1.7	1.4029	1.0088	1.1495		1.3131	0.95296	0.85901	0.74391	0.84962		1.222	1.0029	0.94691	0.83957	0.75848
3.3963	2.0789	1.7804	1.3924	1.6778		1.6716	1.2287	1.1403	1.0271	1.2376		0.99795	0.74812	0.68939	0.67146	1.3101
2.9788	1.8865	1.5319	1.0693	0.97107		1.4244	1.039	0.92343	0.78861	0.71641		1.0342	0.87717	0.82371	0.71348	0.7476
2.4529	1.5945	1.3648	1.0693	1.0572		1.1398	0.86629	0.81333	0.78861	0.78061		1.0025	0.79644	0.76043	0.71348	1.1394
3.2019	1.8413	1.504	1.1501	0.9733		1.4775	1.0291	0.92686	0.84821	0.72032		1.6674	0.90107	0.76046	0.71348	0.36113
4.9047	2.268	1.7343	1.3116	1.3631		2.283	1.2614	1.0587	0.96745	1.004		2.3391	1.4387	1.2937	1.1761	0.99384
4.5082	2.3826	1.8111	1.2309	1.2036		2.143	1.3327	1.11	0.90783	0.88732		2.3876	1.706	1.4484	1.0078	0.67683
3.6355	2.003	1.5961	1.2107	1.1112		1.8146	1.1451	0.99215	0.89292	0.82004		1.5381	1.1791	1.0876	1.0078	0.83122
3.0114	1.6767	1.3357	0.96841	1.0923		1.4104	0.93796	0.82048	0.71412	0.80706		0.96425	0.75964	0.69112	0.58745	0.84378
3.9724	2.3167	1.8863	1.3722	1.3617		1.8989	1.3029	1.1537	1.0122	1.0052		2.5475	1.7649	1.5505	1.3445	1.1143
3.3481	2.0022	1.59	0.9886	1.0692		1.6459	1.1424	0.9835	0.72902	0.78915		1.4185	1.1392	1.0405	0.83957	1.0551
3.4889	2.0839	1.703	1.2511	1.2342		1.6199	1.1439	1.0263	0.92273	0.90897		1.5983	1.3537	1.3009	1.1761	1.2253
3.4648	2.3643	2.0442	1.4732	1.5745		1.6994	1.339	1.2531	1.0867	1.1662		1.398	1.1541	1.0784	0.96571	1.0809
5.9257	2.9703	2.2877	1.554	1.4251		2.8652	1.648	1.3852	1.1464	1.0531		3.2166	1.9793	1.6645	1.0919	1.2413
5.113	2.6849	2.0904	1.4732	1.4644		2.4717	1.5007	1.277	1.0867	1.081		2.6741	1.8938	1.6691	1.2603	1.2201
3.976	2.3511	1.9625	1.453	1.2794		1.9172	1.3366	1.2158	1.0718	0.94777		1.6022	1.2312	1.1312	0.96571	1.2216
4.0897	2.2849	1.8931	1.453	1.5317		1.9662	1.3155	1.1876	1.0718	1.1325		1.133	0.87979	0.82982	0.79753	1.0303
3.4172	2.1908	1.8468	1.3722	1.3672		1.6509	1.2532	1.1524	1.0122	1.0102		1.4131	1.1027	1.0301	0.92366	1.325
4.0786	2.4711	2.0334	1.4732	1.5835		2.0091	1.4472	1.2961	1.0867	1.1704		2.8945	1.8303	1.4738	1.0078	1.1342
3.927	2.3343	1.9132	1.352	1.4901		1.9329	1.3734	1.2232	0.99727	1.1017		1.8173	1.207	1.0283	0.83957	1.2294
4.6048	2.6029	2.1002	1.6752	1.683		2.2108	1.4865	1.3135	1.2359	1.2425		1.9338	1.5341	1.4102	1.3024	1.2572
3.7687	2.4588	2.0814	1.5136	1.685		1.7917	1.3735	1.2678	1.1166	1.2455		1.2984	1.1109	1.0561	0.96571	1.3916
3.8672	2.6422	2.2584	1.6348	1.5362		1.8412	1.4691	1.3645	1.2061	1.1348		1.9099	1.6173	1.5289	1.3445	1.1732
4.3422	2.5133	2.0262	1.3722	1.3302		2.1024	1.4526	1.2752	1.0122	0.98267		1.8992	1.4375	1.279	0.96571	0.75951
3.4729	2.0328	1.674	1.2914	1.2259		1.7859	1.2051	1.0687	0.95254	0.90306		1.2268	1.0013	0.93533	0.83957	0.84841
4.3766	2.6035	2.1891	1.7964	1.5555		2.1345	1.513	1.3832	1.3255	1.148		1.9225	1.5576	1.485	1.4287	0.9805
4.4875	2.7307	2.137	1.1703	1.2049		2.0633	1.4182	1.2121	0.86311	0.89014		1.6151	1.171	1.0469	0.83957	0.72974
4.5435	2.254	1.7521	1.3318	1.2193		2.2373	1.3031	1.1015	0.98236	0.89981		1.7811	1.2369	1.1155	0.96571	0.97221
3.8168	2.4806	2.0796	1.5338	1.3512		1.9936	1.4757	1.3345	1.1315	0.99814		1.7466	1.2042	1.1005	1.0498	0.8531
3.8253	1.9793	1.5767	1.2309	1.421		1.8746	1.1338	0.98036	0.90783	1.0483		1.5397	1.0496	0.94136	0.88161	1.466
3.874	2.1209	1.7139	1.352	1.4572		1.8687	1.2529	1.1067	0.99727	1.0743		2.1938	1.4747	1.2226	0.96571	1.3399
3.84	2.4956	2.0769	1.3722	1.3321		1.8382	1.4055	1.2716	1.0122	0.98457		1.4225	1.1672	1.0765	0.92366	1.0094
3.7933	2.6431	2.2602	1.5742	1.7425		1.7955	1.4479	1.349	1.1613	1.2859		1.677	1.3881	1.2932	1.0919	1.443
3.961	2.5492	2.1606	1.6752	1.992		1.8704	1.4343	1.3277	1.2359	1.4732		1.6537	1.4505	1.4117	1.3866	1.5857
3.3979	2.065	1.6992	1.3116	1.5456		1.7119	1.2154	1.0774	0.96745	1.1413		2.1366	1.6284	1.4482	1.1761	1.1925
5.1297	2.694	2.0611	1.453	1.3466		2.5592	1.553	1.2836	1.0718	0.99596		1.8768	1.4643	1.3053	1.0078	0.99091
3.9958	2.5923	2.1232	1.453	1.2675		1.9004	1.4378	1.2938	1.0718	0.93619		1.6442	1.3406	1.23	0.96571	0.91003
4.1095	2.6565	2.2388	1.655	1.8085		1.9768	1.5019	1.3794	1.221	1.3353		2.2295	1.799	1.6583	1.3445	1.1002
4.1321	2.6386	2.1879	1.554	1.3961		1.9515	1.4639	1.3256	1.1464	1.0301		2.0611	1.6558	1.5261	1.2603	0.7874
4.4595	2.6875	2.1499	1.4328	1.4128		2.1012	1.5037	1.3185	1.0569	1.042		2.4576	1.8542	1.6362	1.2182	1.0162
3.7734	2.3171	1.915	1.3722	1.308		1.8166	1.3213	1.1862	1.0122	0.96458		1.7312	1.1972	1.0992	1.0498	1.2031
3.337	2.263	1.9221	1.352	1.2841		1.7028	1.3514	1.2377	0.99727	0.94635		1.2589	1.0124	0.92455	0.7555	0.88668
4.3721	2.3058	1.8499	1.3318	1.4569		2.1118	1.381	1.207	0.98236	1.0752		3.0071	1.5023	1.1578	0.79753	1.1928
3.3024	2.0076	1.6313	1.2107	1.3217		1.6576	1.1676	1.0273	0.89292	0.97509		1.662	1.2785	1.131	0.88161	0.95912
2.955	1.8819	1.6142	1.2107	0.88018		1.4585	1.0809	1.0054	0.89292	0.64849		0.7833	0.68019	0.66154	0.62945	0.56991
3.4485	2.1255	1.7516	1.2511	1.3691		1.6751	1.1873	1.0668	0.92273	1.0077		1.0852	0.85361	0.79292	0.71348	1.3263
4.641	2.9451	2.3745	1.453	1.5399		2.1301	1.5541	1.3695	1.0718	1.1386		2.2939	1.8475	1.7018	1.3866	1.0475
4.6668	2.7017	2.1287	1.4934	1.5891		2.2388	1.5013	1.2968	1.1017	1.1714		2.0259	1.5495	1.4107	1.2603	1.3791
4.3379	2.5667	2.1377	1.6348	1.6146		2.1354	1.508	1.3622	1.2061	1.1916		1.4779	1.1336	1.0334	0.96571	1.1192
3.911	2.5656	2.1512	1.5338	1.5879		1.8554	1.4201	1.2976	1.1315	1.1693		1.937	1.5476	1.4231	1.1761	0.81127
3.909	2.494	2.0613	1.4732	1.439		1.843	1.3785	1.2456	1.0867	1.0622		1.9737	1.5558	1.408	1.134	0.95115
4.6757	2.3367	1.7807	1.3722	1.4096		2.4493	1.4144	1.1586	1.0122	1.0373		2.7427	1.9169	1.6666	1.3024	0.63716
4.254	2.574	2.1222	1.5338	1.8644		2.1557	1.5079	1.3405	1.1315	1.3769		2.0145	1.3215	1.1708	1.0919	1.7404
4.542	2.6764	2.1222	1.4126	1.4028		2.1614	1.4804	1.2865	1.042	1.0362		1.9824	1.6054	1.4572	1.134	1.2106
4.0803	2.6097	2.2142	1.7156	1.4542		2.0396	1.531	1.4045	1.2658	1.0739		1.6226	1.3633	1.2762	1.2182	0.95981
4.088	2.5498	2.1286	1.6954	1.6721		2.039	1.4741	1.3356	1.2508	1.2356		2.2467	1.6894	1.4977	1.3024	1.2432
3.8602	2.4415	2.0625	1.6146	1.8632		1.9154	1.4226	1.2998	1.1912	1.3741		1.9269	1.462	1.3209	1.1761	1.3863
3.6179	2.3465	1.9791	1.4934	1.4244		1.8299	1.3648	1.242	1.1017	1.0479		1.6984	1.4374	1.3329	1.0919	1.0143
3.8241	2.3913	1.9624	1.3924	1.2211		1.8334	1.3265	1.1853	1.0271	0.89904		2.3064	1.7887	1.605	1.2182	1.1831
4.4152	2.2523	1.7865	1.4328	1.309		2.2494	1.3285	1.1397	1.0569	0.96561		1.7879	1.2944	1.2133	1.134	0.6328
4.6227	2.5205	1.9214	1.2107	1.259		2.0581	1.3742	1.1594	0.89292	0.92722		1.3845	0.78449	0.68983	0.67146	1.2099
4.4349	2.279	1.7465	1.1703	1.2369		1.9978	1.264	1.0734	0.86311	0.90982		3.2551	1.5863	1.1795	0.7555	1.1107
4.7408	2.4516	1.8842	1.2511	1.3804		2.1269	1.3593	1.151	0.92273	1.0183		2.9628	1.4151	1.0495	0.7555	0.52079
4.3024	2.2609	1.7905	1.3116	1.0781		1.9874	1.2895	1.1218	0.96745	0.79602		1.4937	0.86673	0.79883	0.83957	1.0306
3.7401	2.0973	1.6798	1.1097	0.76934		1.8068	1.2415	1.0791	0.81841	0.56625		1.95	0.69932	0.51932	0.41949	0.24222
5.3966	2.7368	2.0521	1.2107	1.1412		2.4288	1.5363	1.2641	0.89292	0.84318		5.7685	2.1405	1.4802	0.92366	0.79957
3.4618	1.9498	1.5733	1.1703	1.289		1.607	1.0931	0.96841	0.86311	0.95069		1.938	1.0695	0.97046	1.0498	0.90228
4.3078	2.1829	1.6808	1.2309	1.3675		2.115	1.2506	1.0541	0.90783	1.0098		1.7178	1.235	1.1193	0.96571	0.73525
3.3814	1.9889	1.6202	1.1097	1.3287		1.609	1.1029	0.97986	0.81841	0.98119		1.2556	0.92928	0.82045	0.58745	1.2303
4.6675	2.4098	1.8188	1.1905	1.3002		2.2779	1.363	1.1218	0.87802	0.96159		1.8145	1.3889	1.241	0.92366	0.45599
3.417	1.9656	1.5967	1.1097	1.1164		1.5909	1.0916	0.96653	0.81841	0.82248		1.4858	1.2063	1.1394	1.0078	1.1305
2.84	1.7629	1.4971	1.1501	1.1707		1.3447	1.0122	0.9412	0.84821	0.86576		1.2085	0.85389	0.78483	0.7555	0.99188
3.628	1.9512	1.5691	1.1703	0.9091		1.7508	1.1415	0.99957	0.86311	0.66954		1.7827	1.0186	0.90603	0.88161	0.74436
3.3325	1.8871	1.5331	1.1097	1.083		1.5317	1.0643	0.95003	0.81841	0.7963		0.97411	0.63724	0.60725	0.67146	0.84729
3.0328	1.8765	1.5454	1.1299	1.0996		1.4142	1.0465	0.94406	0.83331	0.81109		0.90358	0.67696	0.64464	0.71348	0.70935
3.4983	1.9411	1.5723	1.1703	1.3286		1.7233	1.109	0.97233	0.86311	0.98001		1.4434	0.99919	0.9106	0.79753	0.88128
3.6872	2.2722	1.944	1.5136	1.5461		1.766	1.3203	1.2305	1.1166	1.1429		1.1462	0.86475	0.81223	0.83957	1.3067
5.1002	3.0263	2.3728	1.554	1.442		2.476	1.6664	1.4227	1.1464	1.0664		2.1402	1.6686	1.5015	1.134	1.3868
5.5203	2.7538	2.0563	1.4934	1.4194		2.9131	1.7286	1.3843	1.1017	1.0481		3.7052	2.627	2.1215	1.4287	0.55317
4.2675	2.7632	2.2853	1.5136	1.5833		2.0335	1.5319	1.3751	1.1166	1.1657		1.8334	1.4414	1.3431	1.2182	1.1021
4.5458	2.6404	2.1251	1.4934	1.6835		2.1746	1.4832	1.3032	1.1017	1.2422		1.9413	1.4972	1.358	1.134	1.5213
4.6899	2.9639	2.3344	1.3722	1.2706		2.1701	1.5419	1.334	1.0122	0.93736		2.2065	1.6716	1.501	1.0919	0.70801
5.8813	2.9145	2.2373	1.6348	1.6352		2.8475	1.6811	1.4066	1.2061	1.2045		4.0546	2.0696	1.6458	1.3445	1.4494
3.2189	1.9329	1.631	1.1905	1.0602		1.5296	1.0816	0.99373	0.87802	0.78228		0.84885	0.6805	0.64005	0.58745	0.88072
5.3557	3.2135	2.5913	1.6752	1.8757		2.5366	1.7886	1.5683	1.2359	1.3853		2.9687	1.9998	1.7407	1.4287	1.6882
5.1785	3.1297	2.5374	1.7358	1.5985		2.4053	1.732	1.5384	1.2807	1.1799		2.4733	1.7138	1.5429	1.3445	0.8888
5.1991	3.1473	2.5643	1.7156	1.5727		2.4495	1.7524	1.5553	1.2658	1.1624		1.9843	1.502	1.3839	1.2182	1.34
4.6183	2.8879	2.3884	1.6954	1.3263		2.1878	1.6212	1.4612	1.2508	0.9793		2.2225	1.6207	1.4779	1.3024	0.86054
4.976	3.0527	2.515	1.756	1.7041		2.412	1.7267	1.5395	1.2956	1.2598		3.3848	2.1654	1.8689	1.5972	1.6272
4.7225	2.9543	2.4507	1.6954	1.8521		2.2134	1.6393	1.4817	1.2508	1.3693		1.7968	1.2612	1.1587	1.134	1.1685
4.0187	2.31	1.8907	1.4732	1.5837		1.9732	1.3295	1.1794	1.0867	1.1703		1.7937	1.4274	1.3047	1.134	1.1599
5.072	2.8914	2.3088	1.4328	1.563		2.4569	1.7034	1.4712	1.0569	1.1528		2.2443	1.0891	0.8453	0.58745	1.2054
5.3705	2.8971	2.2767	1.3924	1.3022		2.5114	1.6582	1.42	1.0271	0.96262		1.314	0.79602	0.70358	0.58745	1.0041
4.1721	1.9556	1.4613	1.0088	0.92243		2.0308	1.1358	0.92338	0.74391	0.68208		2.2252	1.121	0.88483	0.7555	0.6059
3.2471	1.7283	1.373	1.1097	1.1772		1.6951	1.0472	0.89667	0.81841	0.86874		2.6821	1.7092	1.3741	1.0498	0.67926
3.1651	1.7303	1.4018	1.0895	1.0131		1.5949	1.02	0.8976	0.80351	0.74539		1.0347	0.78177	0.72259	0.67146	0.85394
2.116	1.3734	1.1827	0.90786	0.72015		1.1173	0.8371	0.77221	0.66944	0.53046		0.77009	0.57213	0.52672	0.50345	0.279
4.1454	1.886	1.3901	1.029	1.0178		1.9448	1.0617	0.86002	0.75881	0.75169		1.7628	1.0905	0.92709	0.83957	0.71087
3.1182	1.5773	1.2407	0.90786	0.83547		1.4495	0.90189	0.77981	0.66944	0.61503		0.71007	0.48612	0.44836	0.50345	0.62958
3.3507	1.6992	1.3121	0.94823	0.86867		1.6529	0.98379	0.82431	0.69922	0.6418		1.6479	1.0835	0.91664	0.67146	0.43429
4.4116	1.9939	1.5242	1.1905	1.0913		2.0691	1.1547	0.96566	0.87802	0.80719		2.7024	1.3837	1.115	1.0078	0.89789
2.1606	1.3139	1.0344	0.66568	0.77352		1.019	0.70845	0.61525	0.49077	0.57085		0.90523	0.7057	0.62998	0.46147	0.63001
2.0939	1.3046	1.1047	0.84731	0.78144		1.0006	0.73661	0.67982	0.62476	0.57678		1.03	0.77466	0.70823	0.62945	0.87831
4.9792	2.8247	2.1745	1.2914	1.3749		2.2345	1.5211	1.2897	0.95254	1.0136		1.8544	1.3633	1.2533	1.134	0.90259
4.9994	2.4366	1.817	1.2914	1.2746		2.5991	1.4471	1.158	0.95254	0.94265		2.5406	2.0161	1.7363	1.1761	1.0864
4.4306	2.8421	2.3409	1.5944	1.5554		2.011	1.5625	1.4158	1.1762	1.1481		1.9856	1.6765	1.5643	1.3445	0.82076
4.163	2.7437	2.281	1.5136	1.549		1.9393	1.5259	1.3854	1.1166	1.1425		2.0169	1.7404	1.6443	1.4287	0.78543
4.405	2.5259	2.0673	1.554	1.8093		2.102	1.4839	1.3251	1.1464	1.3374		1.6747	1.1484	1.021	1.0078	1.5477
4.2839	2.7103	2.2466	1.6348	1.6319		2.1144	1.5357	1.3773	1.2061	1.2027		2.3927	1.8941	1.7327	1.4287	1.0392
4.7253	2.8449	2.281	1.4732	1.5838		2.2531	1.5669	1.3676	1.0867	1.1694		1.6825	1.2253	1.098	0.88161	1.1176
4.76	2.9847	2.3937	1.7156	1.8396		2.2679	1.6501	1.4485	1.2658	1.3604		1.9931	1.6443	1.5422	1.4287	1.4332
5.116	2.8808	2.3039	1.6752	1.9196		2.5028	1.6509	1.4386	1.2359	1.4164		1.9391	1.5918	1.4555	1.1761	1.2997
3.8728	2.4813	2.0977	1.554	1.4078		1.8694	1.4181	1.3015	1.1464	1.0409		1.7589	1.453	1.3529	1.1761	1.3243
4.7506	2.8436	2.2754	1.5742	1.6295		2.3301	1.5927	1.382	1.1613	1.2042		2.8122	2.2298	2.0259	1.5972	1.3863
4.5283	2.9217	2.4469	1.8166	2.0799		2.1771	1.6373	1.4989	1.3404	1.537		1.9066	1.5583	1.4632	1.3445	1.8064
4.3755	2.9001	2.3904	1.5944	1.5707		2.0977	1.5711	1.4069	1.1762	1.1588		1.8762	1.5997	1.4852	1.1761	1.3496
5.2515	3.1801	2.5466	1.554	1.5897		2.375	1.7087	1.5014	1.1464	1.1715		1.9875	1.4691	1.347	1.134	1.0483
5.9914	3.3615	2.6965	1.7762	1.7617		2.7871	1.9053	1.6651	1.3105	1.3037		3.0795	1.9272	1.6459	1.3445	1.4156
4.2141	2.1621	1.7014	1.2107	1.0458		2.1212	1.2952	1.1018	0.89292	0.77263		1.1724	0.81228	0.7084	0.62945	0.75297
4.5073	2.3041	1.7853	1.3318	1.4245		2.2264	1.3506	1.1408	0.98236	1.0512		1.9427	1.3242	1.1169	0.83957	0.97748
5.1486	2.7366	2.1405	1.3318	1.3799		2.4046	1.5767	1.3463	0.98236	1.0198		2.813	0.6978	0.49208	0.37751	1.1029
5.4393	2.9612	2.3494	1.5742	1.5329		2.5067	1.683	1.4613	1.1613	1.1318		1.5582	0.99373	0.92656	0.96571	1.1054
4.3774	2.8038	2.187	1.352	1.4937		2.0874	1.5038	1.279	0.99727	1.1058		2.3677	1.9459	1.7738	1.3445	0.88721
4.2835	2.8337	2.3601	1.6752	1.639		2.2262	1.677	1.5052	1.2359	1.2092		1.7036	1.2268	1.1089	1.0078	1.2706
4.7536	3.0702	2.4976	1.5742	1.6719		2.2321	1.6677	1.4782	1.1613	1.2366		2.3229	1.9145	1.7676	1.4287	1.4233
4.4781	2.8613	2.3653	1.5944	1.3067		2.1331	1.5838	1.4308	1.1762	0.96644		2.2454	1.7325	1.5546	1.1761	1.1258
3.2994	2.1134	1.7733	1.2914	1.3138		1.6019	1.215	1.1142	0.95254	0.96958		0.72302	0.57837	0.54343	0.50345	1.2061
5.0633	3.0148	2.4647	1.6146	1.5694		2.4624	1.7655	1.5586	1.1912	1.1565		1.9285	1.3231	1.2139	1.0919	0.82506
4.9036	2.948	2.3585	1.5944	1.503		2.4564	1.7062	1.4744	1.1762	1.1116		2.4533	1.9218	1.7155	1.3024	0.97644
4.5632	2.9617	2.4882	1.7762	1.9113		2.1628	1.6547	1.5157	1.3105	1.4126		1.9569	1.7821	1.7175	1.513	1.6581
5.0403	3.2373	2.6351	1.6146	1.6366		2.3741	1.7626	1.5628	1.1912	1.2099		2.3267	1.8541	1.6987	1.3445	1.2072
4.8493	2.8636	2.2951	1.453	1.65		2.5921	1.7344	1.4881	1.0718	1.2156		1.1267	0.76189	0.68215	0.58745	1.785
3.485	1.8773	1.5	1.1905	1.208		1.6162	1.0524	0.9264	0.87802	0.89118		3.6655	1.8369	1.4195	1.1761	0.62346
5.2983	3.0707	2.4929	1.857	1.9103		2.8239	1.8924	1.6431	1.3703	1.4125		2.1313	1.5452	1.366	1.1761	1.0068
4.4677	1.9465	1.452	1.029	0.86888		2.2591	1.175	0.949	0.75881	0.64081		1.2523	0.83391	0.69022	0.54545	0.80672
5.0282	2.9495	2.3922	1.6954	1.612		2.491	1.7015	1.4967	1.2508	1.1924		2.7002	2.0667	1.8523	1.4287	1.1954
4.1781	1.9132	1.358	0.66568	0.6689		1.9019	1.0677	0.82756	0.49077	0.49307		0.68849	0.37866	0.33653	0.33554	0.45106
4.1852	2.2407	1.8038	1.3722	1.1376		2.1172	1.5581	1.3732	1.1253	0.9409		1.3729	1.13	1.0854	1.0839	0.74707
3.9249	2.0033	1.5944	1.2107	1.3805		1.833	1.3177	1.1678	0.97448	1.1243		1.3117	1.0322	0.94659	0.83125	1.1555
3.6255	1.7942	1.3762	1.0492	1.0973		1.3442	1.0351	0.92386	0.82916	0.92955		1.1274	1.069	1.0688	1.0839	0.94068
4.0993	2.0022	1.5467	1.2107	1.2261		1.5263	1.1408	1.0332	0.97448	1.0311		1.205	0.96646	0.90969	0.93038	0.86468
5.1864	2.5509	2.018	1.5338	1.6258		2.1909	1.6306	1.4716	1.2819	1.3723		1.7044	1.3218	1.2376	1.1895	1.4148
3.9077	2.1604	1.7399	1.3116	1.3158		1.6085	1.327	1.2252	1.0681	1.0633		1.6113	1.337	1.2484	1.1364	1.914
4.7004	2.3712	1.8451	1.352	1.3138		1.772	1.4078	1.2753	1.1061	1.1048		1.5774	1.4256	1.3512	1.1364	0.87392
2.9292	1.1949	0.96148	0.86749	0.93457		1.1362	0.73358	0.66586	0.67188	0.73497		1.1358	0.78854	0.69795	0.64024	0.90869
4.6408	1.6262	1.1252	0.82713	0.74277		1.5241	1.0519	0.91523	0.85672	0.76846		1.8361	1.1816	0.99347	0.9113	0.64484
3.623	1.5356	1.1677	0.90786	0.8865		1.5437	1.1034	0.99366	0.9411	0.92245		2.4247	1.6754	1.387	1.053	0.81355
4.7993	1.5968	1.1252	0.78676	0.74555		1.5127	1.0467	0.92243	0.81458	0.78424		1.2708	0.87319	0.75496	0.6291	0.6577
4.4776	1.7568	1.2811	0.90786	0.95439		1.6471	1.2092	1.0693	0.9411	1.0052		1.3316	1.0894	0.98766	0.9113	0.63431
3.8575	1.5676	1.1654	0.86749	0.79299		1.764	1.2168	1.0426	0.89889	0.81103		1.9404	1.4351	1.1984	0.9821	1.0103
3.8683	1.5384	1.1249	0.78676	0.75607		1.3738	0.99127	0.89403	0.81458	0.79939		0.76016	0.64629	0.62527	0.6291	0.57087
4.8696	1.7786	1.2404	0.84731	0.76656		1.3028	1.0029	0.92392	0.8778	0.79188		1.3103	0.9735	0.8671	0.77	0.45518
5.1998	1.8419	1.2909	0.92804	0.85816		1.3596	1.0436	0.96634	0.96222	0.89703		1.0408	0.83737	0.81244	0.9113	0.96445
5.5809	1.8643	1.2586	0.82713	0.70969		1.679	1.1528	0.99118	0.85672	0.73212		1.6151	1.2672	1.1419	0.9821	0.34486
6.4725	2.0686	1.4228	0.92804	1.1055		2.4331	1.5792	1.2893	0.96222	1.1498		1.722	0.87454	0.64994	0.4886	1.2363
5.0766	1.9903	1.4473	0.96841	0.79335		1.935	1.373	1.2091	1.0045	0.83377		1.0048	0.57162	0.44583	0.34851	0.95723
8.627	2.5305	1.5973	1.029	1.1769		2.1957	1.5167	1.2667	1.0679	1.2324		1.3075	1.0142	0.84684	0.6291	0.89481
7.6227	2.3306	1.5017	0.96841	0.98116		2.1606	1.4694	1.2179	1.0045	1.022		1.7725	1.3758	1.2147	1.053	0.9533
5.271	2.0244	1.4418	0.96841	0.95292		1.6119	1.2388	1.1258	1.0045	0.99835		0.72059	0.5451	0.49073	0.4886	1.1296
5.5922	2.0976	1.5143	1.0693	1.2277		1.8931	1.4039	1.2543	1.1103	1.2736		2.2555	1.6257	1.3009	0.9821	1.2486
4.7162	1.9298	1.4038	0.94823	0.98451		1.4597	1.1813	1.0898	0.98335	1.0284		1.2932	1.0835	0.98187	0.8406	1.0698
5.0777	2.0938	1.4397	0.84731	0.49593		1.338	1.1027	1.0077	0.8778	0.51586		0.97225	0.87082	0.81325	0.6995	0.47973
4.2567	1.862	1.3278	0.82713	0.92798		1.258	1.0617	0.98008	0.85672	0.95485		1.6133	1.4234	1.3354	1.124	1.1111
5.3764	2.1132	1.4102	0.78676	0.68059		1.174	1.0037	0.93337	0.81458	0.69742		1.1936	1.0341	0.93729	0.6995	0.63592
6.7459	2.4869	1.6588	0.94823	1.0844		1.6849	1.2996	1.1632	0.98335	1.1183		1.5029	1.2371	1.1139	0.8406	0.95139
6.2112	2.3005	1.6161	1.1097	0.99873		1.4804	1.2483	1.1881	1.1527	1.0528		1.394	1.1344	0.99654	0.8406	0.82499
7.7986	2.5882	1.606	0.82713	0.93703		1.4858	1.1823	1.0432	0.85672	0.97171		1.3686	1.0852	0.96023	0.8406	1.217
7.2381	2.4537	1.5574	0.82713	0.96101		1.5205	1.1719	1.0372	0.85672	0.99425		1.3128	1.0939	0.99196	0.8406	0.4508
6.8093	2.2651	1.4811	0.88768	0.76483		1.6747	1.2234	1.0695	0.91999	0.80424		1.7359	1.2773	1.0964	0.8406	1.1838
7.0807	2.6215	1.673	0.86749	0.89502		1.6906	1.3118	1.1388	0.89889	0.9218		1.4028	1.2028	1.0878	0.8406	0.95333
7.2869	2.3438	1.512	0.94823	0.89588		1.6377	1.2779	1.1231	0.98335	0.92633		2.0349	1.5856	1.352	1.124	0.69975
5.0678	1.8677	1.2691	0.76658	0.6818		1.4608	1.1183	0.97695	0.79352	0.70119		1.5155	1.3613	1.2323	0.9113	1.0149
3.8982	1.7943	1.3489	0.92804	0.92869		1.3681	1.1291	1.0537	0.96222	0.97195		1.4093	1.2023	1.1327	1.053	1.0386
4.3152	1.9882	1.4205	0.84731	1.0859		1.46	1.1732	1.0543	0.8778	1.1341		1.7426	1.4523	1.3648	1.1951	1.437
3.999	1.7625	1.2824	0.80694	0.89204		1.4513	1.1208	1.0021	0.83564	0.93117		1.4268	1.0674	0.96894	0.9113	1.2871
6.1242	2.3507	1.6406	0.9886	1.32		1.6782	1.3255	1.2114	1.0256	1.3665		1.2641	1.0658	0.95645	0.77	1.375
6.3227	2.3089	1.5674	1.0088	1.0903		1.6295	1.2959	1.167	1.0468	1.1222		1.7403	1.4993	1.3687	1.1951	1.328
11.94	3.5404	2.0149	0.92804	0.77471		2.0175	1.5199	1.2762	0.96222	0.80858		2.4828	2.077	1.8379	1.3376	0.90365
4.9982	2.0391	1.4825	1.0088	0.89966		1.6193	1.2636	1.1519	1.0468	0.93171		1.4701	1.296	1.2414	1.1951	0.86343
6.9686	2.3891	1.576	0.94823	1.0271		1.605	1.2691	1.1321	0.98335	1.0664		1.6479	1.3379	1.1775	0.9113	1.5974
5.4755	2.1072	1.4347	0.86749	0.89202		1.3783	1.1291	1.029	0.89889	0.92129		1.1394	0.92076	0.86168	0.8406	1.2174
5.3754	2.084	1.4358	0.86749	0.96855		1.638	1.2397	1.0923	0.89889	1.0134		2.1401	1.5744	1.3978	1.1951	0.91704
4.1215	1.9104	1.4355	0.9886	0.94153		1.3588	1.1645	1.1015	1.0256	0.98507		1.2302	1.1348	1.1058	1.053	1.2545
5.3668	2.1578	1.4978	0.90786	0.91902		1.506	1.199	1.0841	0.9411	0.95089		1.6221	1.3813	1.2794	1.053	1.0089
3.9879	1.6745	1.2183	0.82713	0.75216		1.0935	0.94982	0.90414	0.85672	0.77353		0.76047	0.69587	0.67349	0.6291	0.43407
5.0156	2.051	1.4374	0.86749	0.81018		1.5487	1.2002	1.0757	0.89889	0.84777		0.58014	0.48702	0.46507	0.4886	0.76452
3.2111	1.5845	1.1932	0.80694	0.66952		1.2197	1.0066	0.92262	0.83564	0.69552		1.2525	1.1861	1.166	1.124	0.50341
4.3463	1.9053	1.3672	0.78676	0.828		1.428	1.1319	1.0192	0.81458	0.86314		0.85247	0.65833	0.59698	0.4886	0.97549
6.4082	2.088	1.3448	0.76658	0.87211		1.4582	1.1024	0.96306	0.79352	0.90901		0.72807	0.57419	0.51365	0.4886	1.2268
7.7095	2.4391	1.5604	0.88768	0.86645		1.6859	1.2693	1.1153	0.91999	0.8993		1.4085	1.0644	0.87763	0.6291	1.0398
7.5973	2.3517	1.4921	0.92804	0.70533		2.2871	1.4297	1.1572	0.96222	0.72391		2.2663	1.624	1.3094	1.053	0.57892
8.1226	2.5853	1.5834	0.84731	0.80974		1.5228	1.1703	1.0306	0.8778	0.85701		1.2777	1.0593	0.97088	0.9113	0.612
5.1665	1.946	1.3562	0.84731	0.86869		1.2486	1.0378	0.969	0.8778	0.89591		0.94907	0.83559	0.79923	0.77	1.1311
6.2088	2.1406	1.3671	0.70604	0.64283		1.1778	0.99664	0.90975	0.73041	0.67624		0.73199	0.58571	0.49658	0.34851	0.38141
3.8203	1.7356	1.2409	0.76658	0.90671		1.1185	0.97933	0.90889	0.79352	0.93154		0.9524	0.88133	0.8443	0.77	0.74638
6.8141	2.3513	1.5546	1.0088	1.1328		2.1578	1.4487	1.2125	1.0468	1.1808		1.9088	1.5711	1.3971	1.1951	1.2225
6.6866	2.2488	1.4863	0.96841	1.2547		1.7732	1.2985	1.1278	1.0045	1.3043		1.8787	1.499	1.298	1.053	1.8562
8.5697	2.5478	1.5174	0.78676	0.7391		1.4778	1.1599	1.0164	0.81458	0.76894		1.3913	1.1427	0.97602	0.6995	1.0971
8.8356	3.0365	1.8992	1.0088	1.082		1.9084	1.4442	1.2564	1.0468	1.129		2.0595	1.5971	1.3733	1.124	1.5034
5.4951	2.4331	1.7777	1.1905	1.0992		2.2278	1.6408	1.4449	1.2376	1.1502		3.0198	2.4217	2.2699	2.2741	1.2048
5.5181	2.2229	1.5881	0.9886	1.1688		1.7796	1.3654	1.2253	1.0256	1.2035		0.91169	0.78899	0.7556	0.6995	1.3557
4.1688	1.818	1.3442	0.86749	0.75996		1.597	1.234	1.0997	0.89889	0.78956		0.48495	0.43498	0.40544	0.34851	0.70066
8.3904	2.726	1.7105	0.86749	0.7332		1.6182	1.2774	1.1364	0.89889	0.75869		0.91756	0.6961	0.60897	0.4886	0.58032
5.9166	2.4256	1.7053	0.9886	0.90943		2.1571	1.476	1.2782	1.0256	0.95205		2.2754	1.2644	1.0509	0.9113	0.72932
3.0251	1.7661	1.4011	0.90786	0.82991		1.6158	1.2974	1.1676	0.9411	0.85636		1.3166	1.1615	1.0989	0.9821	0.79218
4.6721	2.1601	1.6204	1.0693	0.92581		1.775	1.4006	1.2753	1.1103	0.97159		1.0391	0.90227	0.86584	0.77	1.107
5.6866	2.1792	1.4902	0.86749	0.74288		1.5335	1.2133	1.0893	0.89889	0.76032		1.5618	1.3238	1.1966	0.9113	0.45348
3.912	1.8914	1.4982	1.1501	1.1556		2.0337	1.4776	1.3295	1.1951	1.2085		2.4311	1.7313	1.564	1.5522	1.3033
8.0178	2.8933	1.9304	1.1703	1.1774		2.1305	1.5962	1.4034	1.2163	1.2347		1.9814	1.45	1.2964	1.1951	1.3259
7.788	2.8692	1.9032	1.0492	0.88209		1.83	1.4787	1.3324	1.0891	0.91808		0.99775	0.93045	0.88443	0.77	0.73271
5.0175	2.1706	1.5682	1.029	0.96484		1.704	1.3528	1.2167	1.0679	1.0168		1.4425	1.2523	1.1859	1.124	1.3235
6.5673	2.4492	1.5634	0.7464	0.78008		1.9191	1.3515	1.1139	0.77248	0.81931		2.2446	1.7462	1.5612	1.1951	1.2327
5.6217	2.3387	1.7018	1.2309	1.1984		1.7921	1.3896	1.2934	1.2801	1.2275		1.6303	1.3917	1.4128	1.6957	1.5063
4.4988	2.2208	1.667	1.0492	0.79905		1.9166	1.5035	1.341	1.0891	0.82354		2.0158	1.5935	1.4529	1.1951	0.54547
4.2866	2.0648	1.5383	0.9886	0.96068		1.8698	1.4234	1.2557	1.0256	1.0019		1.1845	0.94459	0.85729	0.6995	0.79659
7.4156	2.5951	1.7052	0.94823	1.0186		1.9381	1.4289	1.2424	0.98335	1.0647		2.322	1.7444	1.4967	1.053	1.3378
4.9393	2.2661	1.648	0.9886	1.0465		1.6466	1.3617	1.2418	1.0256	1.0876		1.6765	1.4666	1.3923	1.2663	0.7735
6.6358	2.553	1.7049	0.90786	0.90303		1.9458	1.4436	1.2424	0.9411	0.94167		2.1549	1.6275	1.3819	0.9821	1.1599
5.0831	2.1176	1.5262	0.9886	0.9161		1.6943	1.3242	1.189	1.0256	0.95692		1.6409	1.3309	1.2429	1.1951	0.8184
4.8631	2.3084	1.7076	1.1097	0.95638		2.0172	1.5406	1.3739	1.1527	0.99779		2.8856	2.1608	1.9087	1.4806	1.02
5.7322	2.4844	1.7629	1.0895	0.88917		1.8677	1.4822	1.3302	1.1315	0.91904		1.9986	1.7614	1.6729	1.4806	0.81427
3.7738	1.6809	1.1953	0.66568	0.79418		1.6538	1.1359	0.9515	0.68838	0.82953		2.8812	1.6823	1.3571	0.9821	0.72653
3.0952	1.3667	0.99622	0.62532	0.59042		1.5067	1.007	0.84434	0.64638	0.60956		1.0607	0.63771	0.56313	0.5588	0.63067
5.2445	2.364	1.7006	1.0088	1.113		1.7588	1.4243	1.2795	1.0468	1.1505		1.7945	1.5636	1.4633	1.2663	1.4672
6.8709	2.5962	1.799	1.1299	0.90289		2.4643	1.7082	1.4494	1.1739	0.95556		2.1646	1.8329	1.6866	1.4806	1.3956
11.455	3.0068	1.693	0.90786	0.85032		2.147	1.5361	1.2372	0.9411	0.88225		2.111	1.7446	1.5038	1.053	0.90098
7.4284	2.5479	1.6472	0.86749	0.65756		2.0352	1.4554	1.2303	0.89889	0.68584		1.7441	1.2502	1.0579	0.77	0.85883
7.2135	2.8773	1.9828	1.3116	1.3474		2.2676	1.6897	1.4928	1.3652	1.3901		2.7438	2.2689	2.1396	2.2014	1.165
5.9061	2.5633	1.8492	1.1299	0.97958		2.1458	1.6405	1.4558	1.1739	1.0283		2.509	1.8786	1.6316	1.1951	0.70666
5.8146	2.1968	1.5071	0.96841	0.87734		2.09	1.4122	1.1924	1.0045	0.90595		2.3505	1.6332	1.4213	1.1951	0.93267
5.3429	2.2237	1.6303	1.1097	1.2154		2.3904	1.6496	1.4143	1.1527	1.284		4.0556	2.2075	1.6191	1.1951	1.4468
6.7554	2.6254	1.807	1.0895	1.3244		2.0646	1.5515	1.3661	1.1315	1.3753		2.1304	1.626	1.5246	1.4806	0.65252
10.08	3.2994	2.1158	1.2309	1.2142		1.9965	1.575	1.4275	1.2801	1.2593		2.3016	1.878	1.6143	1.1951	1.3449
11.627	3.7275	2.2316	1.1501	1.0263		2.1453	1.6953	1.4646	1.1951	1.0743		2.6824	2.3719	2.1643	1.6957	0.85391
5.82	2.7263	1.992	1.1703	1.212		2.1057	1.7132	1.5444	1.2163	1.2794		2.2613	1.8303	1.649	1.2663	1.1676
5.2234	2.5225	1.9224	1.2712	1.3683		2.0287	1.6518	1.5222	1.3226	1.421		2.1428	1.9248	1.8371	1.6239	1.6699
6.3526	2.7453	1.9683	1.1905	1.0631		2.1157	1.6885	1.5149	1.2376	1.1163		1.4413	1.1265	0.99976	0.77	1.0649
3.9597	2.1057	1.7017	1.1501	1.2742		1.8362	1.6015	1.5003	1.1951	1.3333		0.3606	0.33115	0.33395	0.34851	1.2258
6.2767	2.4442	1.7261	1.1097	1.0257		1.8944	1.4888	1.3418	1.1527	1.0675		1.9258	1.4002	1.2069	1.053	1.2612
4.7083	2.4711	1.8425	1.1703	1.1821		3.3082	2.1915	1.7391	1.2163	1.2363		8.404	4.7372	3.3919	1.8397	1.5548
4.4928	2.2397	1.7497	1.2511	1.226		2.303	1.7414	1.5472	1.3013	1.2798		1.6602	1.2541	1.1269	1.053	1.3282
8.196	2.846	1.8826	1.2107	1.1902		2.0653	1.578	1.4	1.2588	1.2376		1.2921	1.2188	1.206	1.1951	1.3109
4.5092	1.4727	0.98465	0.66568	0.48479		1.3454	0.89953	0.76843	0.68838	0.50985		1.4007	0.79025	0.62558	0.5588	0.3471
7.8401	3.4232	2.5316	1.756	1.6828		2.7911	2.2001	2.0008	1.8359	1.7804		1.9679	1.9508	2.016	2.2014	1.2631
3.928	1.9175	1.3972	0.82713	0.82562		1.044	0.95057	0.90787	0.84937	0.86674		0.62295	0.44815	0.38542	0.31053	0.64867
5.4191	2.3332	1.5846	0.88768	0.93887		1.1996	1.0624	0.98781	0.91248	0.97276		0.80047	0.69976	0.64895	0.62434	0.52764
5.3926	2.341	1.6107	0.84731	0.82597		1.1149	1.0167	0.95731	0.87039	0.86317		43.956	5.8435	2.2192	0.62434	1.0175
4.2128	1.9963	1.4138	0.78676	0.79556		1.0634	0.96746	0.9128	0.80737	0.80382		0.25273	0.29164	0.29697	0.31053	0.53789
5.1791	2.3074	1.601	0.86749	0.77475		1.1946	1.0452	0.97743	0.89143	0.81631		1.2755	0.90644	0.7664	0.62434	0.89675
4.8179	2.2662	1.5994	0.88768	0.94886		1.0628	0.98894	0.95214	0.91248	0.98788		0.62159	0.43916	0.37206	0.31053	1.2314
5.3134	2.3136	1.61	0.90786	0.74556		1.1101	1.0076	0.96641	0.93354	0.78296		1.968	1.4638	1.3144	1.262	0.64408
5.1893	2.2752	1.6316	0.9886	0.8831		1.1641	1.0567	1.028	1.018	0.92278		2.041	1.6536	1.6132	1.586	0.55668
4.0889	1.9179	1.4074	0.90786	0.70071		1.1574	1.0277	0.96879	0.93354	0.73068		3.3678	3.0271	2.8357	2.5792	0.85852
4.6061	2.0749	1.4944	0.88768	0.81625		1.0943	0.99399	0.95782	0.91248	0.85534		0	0	0	0	0.93376
6.4571	2.6604	1.751	0.82713	0.781		1.3535	1.1541	1.0458	0.84937	0.81041		0.18162	0.39107	0.52518	0.62434	0.852
6.5544	2.5937	1.754	0.94823	0.82545		1.37	1.1732	1.0931	0.97572	0.85957		0	0	0	0	0.73996
5.868	2.6468	1.8811	1.0088	1.1096		1.3475	1.214	1.1616	1.0391	1.144		1.0764	0.97944	0.95871	0.94149	0.72194
5.149	2.3013	1.6321	1.0088	0.95614		1.3785	1.1885	1.1051	1.0391	0.98842		1.4	1.3225	1.2926	1.262	1.5512
5.3376	2.4469	1.7597	1.0088	0.91689		1.2534	1.1702	1.1295	1.0391	0.95162		0.72445	0.64906	0.62254	0.62434	0.81957
5.5069	2.4472	1.6946	0.90786	0.83065		1.2287	1.1038	1.0393	0.93354	0.87274		4.5056	2.9615	2.2154	1.262	1.0189
5.9574	2.6921	1.8731	1.0492	0.91204		1.2931	1.1776	1.12	1.0814	0.94109		2.8573	2.7467	2.6658	2.5792	1.153
5.2016	2.2326	1.5782	0.92804	0.88347		1.2418	1.098	1.0389	0.95463	0.93058		1.2662	1.0871	0.99832	0.94149	0.89574
6.2028	2.5805	1.7722	1.0088	1.0921		1.2534	1.1285	1.0725	1.0391	1.1419		0.42427	0.52008	0.57904	0.62434	0.79796
6.1001	2.8096	1.9537	1.0895	1.0426		1.4226	1.2584	1.1825	1.1238	1.1067		1.1794	1.0598	1.0033	0.94149	1.1329
8.4486	3.3266	2.1625	1.0492	1.1326		1.5315	1.3712	1.2634	1.0814	1.1923		0.48586	0.55491	0.57644	0.62434	1.1659
6.8696	2.8649	1.915	0.96841	0.8155		1.4158	1.2447	1.1473	0.99683	0.86694		0.23528	0.28265	0.29343	0.31053	0.672
5.4523	2.4071	1.6405	0.80694	0.81441		1.0582	0.97765	0.93545	0.82836	0.85619		0	0	0	0	0.73709
5.2324	2.4818	1.8065	1.0088	1.094		1.2245	1.153	1.1231	1.0391	1.1538		0.12284	0.28684	0.3039	0.31053	1.4569
4.4124	2.2159	1.6817	1.029	1.0004		1.1985	1.1356	1.1178	1.0603	1.0349		0	0	0	0	1.4413
4.9975	2.3464	1.6983	0.94823	1.0399		1.154	1.1016	1.0739	0.97572	1.0894		0.66019	0.75238	0.67115	0.31053	1.23
4.7034	2.3137	1.7181	1.0895	1.0893		1.2799	1.1817	1.147	1.1238	1.154		1.6949	1.6061	1.5958	1.586	0.70353
6.0744	2.629	1.866	1.0088	0.89776		1.2703	1.1597	1.1274	1.0391	0.93035		0	0	0	0	0.6533
4.7737	2.2542	1.6706	1.0895	0.91894		1.3492	1.2112	1.1608	1.1238	0.96027		2.2099	2.0715	2.0196	1.9135	0.97672
6.2939	2.6451	1.8272	0.94823	0.95605		1.2409	1.1267	1.0803	0.97572	1.0024		0.41055	0.54451	0.58692	0.62434	1.0681
6.122	2.5703	1.7512	1.0088	0.93533		1.266	1.1121	1.0465	1.0391	0.97301		1.5883	1.5934	1.5714	1.586	0.6404
5.8303	2.681	1.9354	1.1097	1.1488		1.4206	1.2805	1.2321	1.145	1.1905		2.7517	1.4115	1.1438	0.94149	1.3653
7.4097	3.0247	2.0636	1.0693	1.1105		1.4943	1.3145	1.243	1.1026	1.1459		1.0839	0.73624	0.63165	0.62434	1.5036
5.3126	2.1729	1.4731	0.68586	0.55733		1.2285	1.039	0.93774	0.70263	0.58292		0.18256	0.29366	0.30614	0.31053	0.51511
4.4596	1.8836	1.3109	0.70604	0.77828		1.1066	0.94957	0.87066	0.72355	0.79898		11.886	1.1281	0.59768	0.31053	0.5928
4.0318	1.7933	1.2698	0.70604	0.76383		1.0799	0.91406	0.83993	0.72355	0.79541		1.4583	1.2642	1.2836	1.262	1.0355
3.568	1.7161	1.2859	0.80694	0.80886		1.1153	0.98811	0.93106	0.82836	0.86051		2.6381	2.0911	1.8694	1.586	1.0171
5.0223	2.2181	1.5709	0.84731	0.84045		1.1435	1.0254	0.97706	0.87039	0.8788		0.15458	0.54281	0.59593	0.62434	1.0674
4.8227	2.1658	1.5407	0.86749	0.79506		1.33	1.1397	1.0452	0.89143	0.82863		0.25245	0.29517	0.30336	0.31053	1.1674
3.8572	1.8308	1.3487	0.76658	0.7014		1.2661	1.0771	0.98368	0.78639	0.72586		1.0413	0.81752	0.72345	0.62434	0.73596
4.6219	2.0747	1.4678	0.86749	0.98584		1.2078	0.99845	0.92748	0.89143	1.0368		3.4216	2.1483	1.8235	1.586	1.1933
5.1609	2.306	1.6221	0.88768	0.83187		1.182	1.0471	0.99157	0.91248	0.86608		0.69266	0.88248	0.91939	0.94149	0.8249
4.9041	2.0327	1.4458	0.94823	0.95607		1.144	0.99394	0.94875	0.97572	1.0033		1.221	1.0842	1.0146	0.94149	1.3416
5.2396	2.4951	1.7776	0.94823	1.1702		1.3957	1.2317	1.1488	0.97572	1.2177		1.0306	0.99537	0.96002	0.94149	0.93946
3.531	1.9471	1.5286	1.0492	1.1701		1.5305	1.3444	1.2432	1.0814	1.2051		3.2258	2.7601	2.6607	2.5792	1.2819
6.0004	2.6172	1.8418	0.9886	0.85571		1.6791	1.3762	1.2453	1.018	0.90109		1.7258	1.4206	1.3265	1.262	0.96499
5.9526	2.6045	1.8221	0.92804	0.87669		1.6288	1.3817	1.2486	0.95463	0.91475		0.50453	0.3733	0.32848	0.31053	0.7257
5.072	2.4551	1.833	1.1703	1.2622		1.4036	1.2901	1.2533	1.2088	1.311		1.6227	1.5973	1.5675	1.586	1.3566
6.0068	2.7436	1.9745	1.1501	1.2832		1.3835	1.2757	1.2437	1.1875	1.3384		1.6525	1.284	1.1318	0.94149	0.89208
9.8409	3.8528	2.5114	1.2309	1.2919		1.8629	1.5851	1.453	1.2726	1.3601		1.1264	0.83757	0.70722	0.62434	1.199
5.888	2.6993	1.943	1.1703	1.156		1.5077	1.3466	1.2775	1.2088	1.2165		1.1045	1.0276	0.97925	0.94149	1.5041
7.1876	2.96	2.0389	1.2309	1.1973		1.5321	1.3423	1.2686	1.2726	1.2539		2.8635	2.4267	2.2735	2.2446	1.32
6.2887	2.7953	1.9676	1.0492	1.0567		1.7404	1.4522	1.3168	1.0814	1.1197		1.5153	1.1958	1.0554	0.94149	1.5535
5.2099	2.4025	1.7628	1.0693	1.333		1.6369	1.406	1.2922	1.1026	1.4176		0.94606	0.92819	0.9217	0.94149	1.7698
5.5082	2.6316	1.9268	1.1299	1.1844		1.746	1.4992	1.3791	1.1663	1.2351		0.97268	0.7994	0.7225	0.62434	0.90528
3.7427	1.6844	1.2089	0.72622	0.56863		0.90398	0.81693	0.77774	0.74448	0.58458		0	0	0	0	0.51914
2.9297	1.4146	1.0337	0.60514	0.47268		0.79294	0.71413	0.67619	0.6191	0.49023		0.78842	0.70298	0.66682	0.62434	0.35553
6.2253	2.8107	2.0434	1.2309	1.4821		1.6639	1.4739	1.3986	1.2726	1.5428		2.8411	2.5555	2.3984	2.2446	1.1717
7.6935	3.3799	2.3592	1.2712	1.1709		1.8001	1.5438	1.447	1.3153	1.2062		2.4591	2.2397	2.1889	2.2446	1.4267
5.4317	2.8621	2.2209	1.5338	1.7488		1.7701	1.6594	1.6122	1.594	1.8668		6.8532	6.7004	6.6212	6.5174	1.9462
2.9141	1.6713	1.3022	0.90786	0.84076		1.6653	1.3318	1.202	0.98307	0.90735		2.1606	1.7475	1.6154	1.4308	0.7068
3.5779	1.7725	1.3299	0.90786	1.0685		1.8252	1.3785	1.2188	0.98307	1.164		2.5556	1.8524	1.5974	1.3201	1.6368
3.344	1.7524	1.3125	0.92804	0.92641		1.5431	1.2434	1.1261	1.005	0.99977		1.704	1.1848	1.0645	0.98862	1.272
2.4584	1.5325	1.2415	0.92804	0.87221		1.376	1.1955	1.1285	1.005	0.93872		1.9812	1.5107	1.3522	1.099	0.52087
3.0377	1.6538	1.2681	0.94823	0.94609		1.3986	1.1592	1.0786	1.027	1.0297		2.2977	1.8665	1.6474	1.4308	1.1696
3.0362	1.5697	1.2327	1.0088	0.88117		1.5974	1.232	1.1368	1.0928	0.95663		2.0621	1.377	1.2174	1.099	1.0455
2.4188	1.4084	1.1364	0.86749	0.87637		1.6103	1.2122	1.0965	0.9392	0.94631		2.0214	1.4527	1.3007	0.98862	0.97809
3.1159	1.7625	1.3379	0.84731	0.90594		1.498	1.2278	1.1247	0.91727	0.98708		1.2583	0.9505	0.83871	0.6581	0.95443
3.8574	1.8269	1.3142	0.84731	1.0033		1.6259	1.2544	1.1151	0.91727	1.0896		1.3743	0.89816	0.82416	0.76817	1.3556
2.8681	1.7022	1.3135	1.0088	0.91573		1.7075	1.3292	1.2005	1.0928	0.97826		1.5798	1.2721	1.2046	1.099	0.85609
4.6562	2.2009	1.5612	0.94823	0.9132		2.0944	1.5097	1.3099	1.027	0.98067		1.9934	1.3908	1.1955	0.76817	0.71608
3.6477	1.9016	1.406	0.90786	0.82688		1.6949	1.3497	1.2108	0.98307	0.88726		1.2746	0.97356	0.86723	0.76817	1.0013
2.5771	1.4869	1.2025	1.0088	1.0162		1.6682	1.2838	1.1667	1.0928	1.0972		2.4193	1.6487	1.4012	1.099	0.80157
3.8264	1.6896	1.206	0.86749	0.79089		2.0468	1.3078	1.1096	0.9392	0.8434		5.5217	2.9822	1.9029	0.76817	0.60835
3.2222	1.6206	1.2121	0.78676	0.87362		1.4775	1.1386	1.0368	0.85149	0.95116		1.761	1.3833	1.2773	1.099	0.78471
2.7899	1.4737	1.1442	0.88768	0.99458		1.4344	1.1055	1.0132	0.96113	1.0765		1.7542	1.1705	1.1346	1.2095	1.0581
2.4296	1.3658	1.0633	0.82713	0.74526		1.4043	1.069	0.96684	0.89534	0.81139		0.80091	0.72345	0.70117	0.6581	1.203
2.7552	1.3885	1.0657	0.78676	0.92741		1.3922	1.0166	0.92869	0.85149	0.99506		0.84598	0.68034	0.65272	0.6581	0.87466
2.9136	1.4327	1.0905	0.84731	0.79926		1.5176	1.1124	0.99619	0.91727	0.86188		3.0773	1.8739	1.6147	1.4308	0.74711
2.4078	1.2593	1.0269	0.88768	0.91131		1.3603	1.0196	0.95736	0.96113	0.97932		1.2407	0.93146	0.9173	0.98862	1.3142
3.4092	1.6708	1.2533	0.88768	0.78911		1.4303	1.1448	1.0607	0.96113	0.84882		3.1844	1.4557	0.99527	0.54815	1.3218
3.2683	1.6492	1.23	0.78676	0.96186		1.5169	1.176	1.0631	0.85149	1.0558		0.94536	0.48485	0.39224	0.32856	0.95619
2.7785	1.533	1.1776	0.84731	1.1014		1.4651	1.1378	1.0315	0.91727	1.1971		1.3037	1.052	0.96597	0.87834	1.387
2.9091	1.5898	1.2253	0.90786	1.1214		1.4339	1.1346	1.0467	0.98307	1.2217		3.1161	1.9678	1.6234	1.3201	0.8324
2.7433	1.4998	1.1278	0.82713	0.83519		1.3158	1.0629	0.96696	0.89534	0.90118		1.3557	1.0839	0.98075	0.87834	0.88819
3.5924	1.8207	1.355	0.84731	0.94004		1.5046	1.2246	1.1279	0.91727	1.0174		0.62429	0.52357	0.41617	0.21893	0.99551
2.8318	1.5116	1.188	0.80694	0.86874		1.419	1.1155	1.0352	0.87341	0.94792		2.3402	1.409	1.087	0.6581	0.88628
2.9878	1.5517	1.1817	0.82713	0.85615		1.2949	1.0444	0.97411	0.89534	0.92793		1.5628	1.0369	0.90444	0.76817	1.3574
2.8537	1.5189	1.1722	0.92804	1.0843		1.4102	1.1297	1.038	1.005	1.1813		1.3767	1.1523	1.152	1.3201	1.7829
3.1564	1.639	1.2456	0.92804	0.70306		1.6015	1.2026	1.0919	1.005	0.76773		1.5655	1.3118	1.2308	1.099	0.69891
3.8579	1.9413	1.4435	0.9886	0.97288		2.1109	1.435	1.2513	1.0709	1.0501		3.6403	1.9415	1.434	0.87834	1.3413
4.5479	1.9929	1.4205	0.94823	1.139		2.0586	1.3765	1.1934	1.027	1.224		3.5258	1.9768	1.3771	0.6581	1.3515
3.4319	1.6397	1.216	0.88768	1.1358		1.7747	1.2631	1.1089	0.96113	1.2079		0.85014	0.59474	0.54667	0.54815	1.3512
2.6398	1.45	1.1247	0.82713	0.83195		1.4656	1.1312	1.0227	0.89534	0.89459		1.2534	0.98414	0.91803	0.87834	0.85262
3.016	1.6322	1.2278	0.86749	0.80728		1.4435	1.1415	1.0389	0.9392	0.87503		1.4639	1.1411	1.0678	0.98862	0.68373
3.7255	1.8099	1.2902	0.80694	0.7181		1.5733	1.2144	1.0682	0.87341	0.78266		3.0172	1.6386	1.2779	0.87834	0.99026
1.9891	1.1746	0.95808	0.7464	1.0446		1.1338	0.9429	0.88752	0.80767	1.1414		0.95676	0.66571	0.56448	0.4383	0.43877
2.789	1.5245	1.1724	0.88768	0.91864		1.2776	1.0637	0.99257	0.96113	0.99527		2.2972	1.6642	1.4831	1.3201	0.98984
2.6962	1.4436	1.1448	0.92804	1.164		1.5204	1.1793	1.0805	1.005	1.2613		3.2776	2.1944	1.9234	1.7637	1.1654
3.2119	1.5333	1.161	0.86749	0.84011		1.5052	1.1343	1.0347	0.9392	0.89892		0.89454	0.73132	0.64757	0.54815	0.89619
2.9315	1.5424	1.1913	0.84731	1.0248		1.467	1.1496	1.054	0.91727	1.1114		1.3171	0.82662	0.74478	0.76817	1.077
3.0914	1.566	1.1918	0.78676	0.68323		1.5263	1.1277	1.0241	0.85149	0.73578		0.71487	0.52197	0.46442	0.4383	0.5148
2.5118	1.3586	1.0866	0.84731	0.82159		1.3912	1.0815	1.0002	0.91727	0.88633		1.8118	1.1239	0.93577	0.76817	1.2118
2.3502	1.3431	1.0952	0.86749	1.0107		1.2267	1.0337	0.99138	0.9392	1.0856		0.41685	0.54529	0.60466	0.76817	1.3665
2.7674	1.51	1.1813	0.90786	0.88044		1.2962	1.0481	0.99682	0.98307	0.95191		1.6231	1.0918	0.96311	0.87834	1.0563
2.3944	1.4319	1.1108	0.7464	0.70806		1.2427	1.0308	0.95445	0.80767	0.76324		1.568	1.2653	1.1283	0.87834	0.80246
2.141	1.3717	1.1066	0.82713	1.0736		1.3245	1.0784	0.99461	0.89534	1.1543		1.7385	1.2849	1.1158	0.76817	1.4034
3.2925	1.6812	1.2518	0.86749	0.9439		1.5906	1.2009	1.0739	0.9392	1.0212		2.3741	1.6544	1.4099	1.099	1.0506
2.727	1.5151	1.1992	0.90786	0.9065		1.5362	1.1762	1.0794	0.98307	0.9656		1.9149	1.3735	1.1843	0.87834	0.74625
2.4324	1.3729	1.0917	0.84731	0.77843		1.5286	1.1498	1.0356	0.91727	0.84297		1.0959	0.99397	0.93385	0.76817	0.99445
2.844	1.5079	1.1843	0.92804	0.83218		1.5947	1.1774	1.0802	1.005	0.89856		2.288	1.5583	1.3749	1.099	0.82043
3.1456	1.6075	1.2415	0.90786	0.90538		1.5954	1.2091	1.1069	0.98307	0.9885		1.9187	1.458	1.3854	1.3201	0.85643
2.8345	1.4647	1.1346	0.90786	0.95233		1.3699	1.1005	1.0184	0.98307	1.0335		2.1955	1.543	1.3501	1.099	1.5446
2.7305	1.4405	1.1172	0.82713	0.69358		1.4826	1.1207	1.0152	0.89534	0.75794		1.0806	0.79896	0.73327	0.6581	0.31451
1.817	1.1918	0.98227	0.80694	0.75854		1.0463	0.93043	0.89404	0.87341	0.81113		1.4326	1.3705	1.2997	1.099	0.94039
2.8951	1.478	1.0887	0.72622	0.53662		1.3594	1.0312	0.91875	0.78576	0.57611		1.5855	1.1445	1.0052	0.87834	0.46956
2.6128	1.397	1.0672	0.80694	0.76663		1.2408	0.98273	0.90783	0.87341	0.82202		1.3834	1.1376	1.0557	0.98862	0.74023
2.2485	1.2815	1.0256	0.78676	0.98837		1.3119	1.012	0.93419	0.85149	1.0762		1.5045	1.1103	0.96641	0.76817	0.77547
3.4023	1.6989	1.2576	0.92804	0.86098		1.6042	1.1884	1.0707	1.005	0.93299		2.1598	1.3878	1.2695	1.2095	1.0454
3.4835	1.8388	1.3401	0.88768	0.91484		1.7622	1.3042	1.1384	0.96113	0.99446		1.1733	0.85363	0.73149	0.54815	1.703
4.2311	1.8867	1.3314	0.94823	1.0211		1.5783	1.2303	1.1061	1.027	1.1049		4.1576	2.2376	1.7183	1.5417	1.2263
3.3002	1.7235	1.331	0.92804	0.8542		1.6732	1.2926	1.1829	1.005	0.92505		1.2108	0.92272	0.84142	0.76817	0.91201
3.0821	1.7051	1.3388	0.96841	1.0442		1.6344	1.2927	1.1927	1.0489	1.1232		1.9172	1.5939	1.4458	1.2095	1.0332
2.8565	1.6715	1.3216	0.92804	0.83404		1.5794	1.2931	1.1914	1.005	0.90145		2.0773	1.6308	1.462	1.099	0.90014
2.5745	1.5973	1.3079	1.0088	1.0029		1.6269	1.3297	1.2342	1.0928	1.0863		2.8309	2.1816	1.9347	1.5417	1.1515
4.2153	1.976	1.4506	1.029	1.0698		1.8449	1.3662	1.2334	1.1148	1.1636		2.6341	1.6772	1.4368	1.2095	1.3522
2.98	1.5955	1.2661	0.96841	0.88516		1.5954	1.2132	1.1341	1.0489	0.96222		1.207	0.98292	0.9246	0.87834	1.3648
2.8386	1.5641	1.234	0.92804	0.79882		1.5728	1.2183	1.121	1.005	0.86403		1.4911	1.1699	1.0611	0.87834	0.74491
3.7337	1.8543	1.4046	0.94823	1.1048		1.6795	1.2954	1.1945	1.027	1.1966		0.93507	0.70432	0.63472	0.54815	1.402
2.9826	1.5037	1.1753	0.86749	0.83143		1.6814	1.2263	1.1053	0.9392	0.89339		2.143	1.4518	1.2249	0.98862	0.81526
2.8758	1.5212	1.2184	0.94823	1.0305		1.5284	1.1898	1.1171	1.027	1.1158		2.6934	1.7526	1.5208	1.4308	1.0826
3.983	1.8644	1.393	1.0088	1.0527		1.7669	1.2962	1.1838	1.0928	1.1412		2.1823	1.1142	0.88211	0.76817	0.9966
3.1941	1.7408	1.3214	0.88768	1.065		1.623	1.296	1.1701	0.96113	1.155		2.1898	1.4752	1.2665	1.099	1.2204
3.4479	1.684	1.2774	0.84731	0.84772		1.4804	1.1559	1.0822	0.91727	0.9116		1.4448	1.1328	0.96347	0.6581	1.1553
2.4538	1.5092	1.2426	0.96841	1.0114		1.5791	1.2772	1.1897	1.0489	1.0959		2.2096	1.9431	1.9001	1.7637	0.71637
3.2429	1.631	1.2463	0.92804	1.0941		1.5114	1.1688	1.0819	1.005	1.1938		3.0086	1.9677	1.7208	1.4308	0.79411
3.046	1.6485	1.2705	0.94823	1.0645		1.5913	1.2354	1.1294	1.027	1.1364		1.3019	1.0622	0.99275	0.87834	1.2504
3.0375	1.6477	1.244	0.80694	0.66672		1.5457	1.1893	1.0754	0.87341	0.71966		0.56986	0.58421	0.57415	0.54815	0.69397
3.4588	1.7904	1.3292	0.86749	0.78178		1.6875	1.3072	1.1587	0.9392	0.85412		1.6716	1.1324	0.98786	0.87834	1.0382
3.346	1.773	1.3362	0.90786	0.83552		1.6286	1.2471	1.1306	0.98307	0.90723		1.5403	1.2122	1.0529	0.87834	0.52163
4.1075	1.8585	1.3458	0.90786	0.74636		1.6717	1.2244	1.1068	0.98307	0.796		1.7514	1.2348	1.1493	1.2095	0.93235
3.2434	1.6745	1.2758	0.82713	0.85758		1.6513	1.2805	1.147	0.89534	0.91973		2.6085	1.6178	1.3383	1.099	1.1263
3.4118	1.7077	1.2985	0.92804	0.83998		1.477	1.1605	1.0869	1.005	0.91715		3.2606	1.8888	1.507	1.099	1.281
3.3398	1.7894	1.3222	0.80694	0.73421		1.8073	1.381	1.1969	0.87341	0.79715		1.9238	1.5392	1.3775	1.099	1.0075
2.469	1.4836	1.188	0.86749	0.74281		1.4871	1.1995	1.1007	0.9392	0.80825		1.3719	1.116	1.0134	0.76817	0.63286
2.3467	1.2759	1.0206	0.78676	0.90026		1.3729	1.0227	0.94055	0.85149	0.98216		1.4027	1.0432	0.95581	0.76817	0.82333
2.4188	1.3591	1.0933	0.84731	0.85169		1.1191	0.96539	0.9426	0.91727	0.92935		1.3566	0.97615	0.84767	0.6581	0.77415
3.427	1.7138	1.2496	0.82713	0.82881		1.6766	1.1993	1.0553	0.89534	0.90217		1.433	0.92051	0.73905	0.54815	0.99487
3.7422	1.81	1.3348	0.78676	0.80173		1.8869	1.3682	1.1942	0.85149	0.87291		0.36018	0.42643	0.45634	0.4383	0.89843
3.6046	1.8671	1.3789	0.94823	1.0163		1.6937	1.3191	1.1846	1.027	1.1007		1.7867	1.3213	1.1783	0.98862	1.6542
2.3216	1.2004	0.95699	0.80694	0.63626		1.2993	0.954	0.88148	0.87341	0.68526		2.9291	1.6808	1.3748	1.099	0.37509
3.5937	1.66	1.1924	0.78676	0.81974		1.5987	1.1296	0.99751	0.85149	0.88594		2.4649	1.5975	1.2331	0.76817	0.71219
2.3471	1.2733	0.99741	0.76658	0.64444		1.2473	0.98938	0.90792	0.82958	0.69223		0.66651	0.83623	0.88503	0.87834	0.60082
2.7608	1.3611	0.97255	0.62532	0.65652		1.2287	0.91186	0.80144	0.6763	0.70882		1.9985	1.2844	1.0735	0.87834	0.63711
2.2327	1.1662	0.90783	0.72622	0.65055		1.1643	0.88241	0.81154	0.78576	0.69944		2.063	1.3541	1.1928	1.099	0.64427
2.7553	1.3098	0.99593	0.70604	0.53039		1.4371	0.9962	0.89066	0.76386	0.57843		2.1428	1.1386	0.93993	0.76817	0.61117
3.6723	1.6185	1.1368	0.72622	0.74591		1.9105	1.2153	1.0095	0.78576	0.79839		2.4368	1.6215	1.2951	0.76817	0.74321
3.2058	1.4782	1.0695	0.68586	0.85896		1.9645	1.2419	1.0214	0.74196	0.92932		5.6011	3.0556	1.9937	0.87834	0.685
2.9209	1.4538	1.08	0.7464	0.83687		1.6733	1.1478	0.98767	0.80767	0.90493		3.5454	1.6822	1.2174	0.76817	0.46924
3.4802	1.7214	1.2422	0.86749	0.8368		2.0123	1.2777	1.0738	0.9392	0.90093		1.9219	1.4204	1.2644	0.98862	0.82445
2.3779	1.154	0.88336	0.70604	0.66302		1.312	0.90007	0.80511	0.76386	0.7259		0.84002	0.60164	0.57933	0.54815	0.46623
2.546	1.3031	0.9955	0.78676	0.81215		1.4124	1.0059	0.89908	0.85149	0.87145		3.4412	2.2541	1.8837	1.3201	1.0299
2.8554	1.4109	1.0561	0.80694	0.8611		1.646	1.0943	0.95061	0.87341	0.93201		1.7118	1.2487	1.0834	0.87834	1.1977
3.0628	1.3766	0.99659	0.70604	0.7714		1.3075	0.93149	0.83574	0.76386	0.83837		3.5783	1.7287	1.2108	0.76817	0.92135
3.2383	1.5305	1.1187	0.7464	0.73173		1.9316	1.2377	1.0342	0.80767	0.79362		2.499	1.6154	1.2577	0.6581	0.67619
2.4757	1.371	1.0434	0.7464	0.77397		1.3572	1.0231	0.91227	0.80767	0.83413		1.3702	1.1535	1.0795	0.98862	0.65295
3.3273	1.4757	1.0682	0.76658	0.84474		1.6778	1.0848	0.9335	0.82958	0.91699		1.6776	1.1184	0.98845	0.87834	1.4592
2.4865	1.3468	1.0848	0.92804	0.92269		1.5914	1.1525	1.0478	1.005	0.99552		2.3082	1.5203	1.4052	1.4308	0.76473
3.5247	1.576	1.1647	0.90786	0.8568		1.8824	1.1989	1.039	0.98307	0.92367		1.4786	0.95718	0.93108	0.98862	0.56812
2.4775	1.3256	1.034	0.80694	0.85086		1.607	1.1019	0.96895	0.87341	0.93135		0.95363	0.80294	0.77741	0.76817	1.1971
2.919	1.412	1.0611	0.80694	0.84498		1.5771	1.09	0.9573	0.87341	0.92444		1.7912	1.2109	1.0503	0.87834	0.72813
3.618	1.637	1.1924	0.84731	0.72593		1.6045	1.1657	1.031	0.91727	0.79186		23.254	8.5907	3.6231	1.2095	0.87222
2.7848	1.4924	1.168	0.76658	0.65005		1.4202	1.1565	1.0611	0.82958	0.69998		2.2606	1.7716	1.3727	0.76817	0.53218
2.2613	1.234	0.97999	0.68586	0.64757		1.1982	0.95569	0.89227	0.74196	0.70653		0.60905	0.51741	0.47985	0.4383	0.67689
3.8211	1.7154	1.2488	0.88768	1.0055		2.3993	1.4495	1.2029	0.96113	1.0814		5.0414	2.9736	2.0707	0.98862	1.2986
3.1747	1.5511	1.1591	0.84731	0.90819		1.5518	1.1306	1.0154	0.91727	0.97775		2.2075	1.0535	0.85002	0.76817	1.1279
3.7662	1.9205	1.3968	1.0088	1.0445		1.8996	1.3303	1.1585	1.0928	1.1366		2.284	1.5745	1.3999	1.099	0.58892
2.3856	1.3823	1.1061	0.80694	0.93997		1.4616	1.1657	1.0642	0.87341	1.015		1.1556	0.82191	0.72951	0.6581	1.0003
2.9176	1.6662	1.2795	0.92804	1.1616		1.712	1.3373	1.1889	1.005	1.2492		1.7651	1.393	1.2669	0.98862	1.6049
4.4009	2.2227	1.563	1.0088	1.17		2.0321	1.476	1.2724	1.0928	1.2706		1.7007	1.3492	1.2088	0.98862	0.6038
3.3005	1.6339	1.2524	0.9886	1.3185		1.5273	1.1787	1.0922	1.0709	1.4158		1.3916	1.1661	1.1095	1.099	1.5865
2.3986	1.4055	1.111	0.78676	0.82267		1.4705	1.1686	1.0582	0.85149	0.89283		2.0498	1.544	1.3677	0.98862	0.58593
4.1952	2.0096	1.4225	0.76658	0.62003		1.8077	1.379	1.1964	0.82958	0.67138		0	0	0	0	0.71818
2.661	1.3787	1.0432	0.72622	0.7567		1.2645	0.98442	0.90192	0.78576	0.81309		1.4155	1.0303	0.92987	0.87834	0.87851
2.8539	1.493	1.1415	0.7464	0.98195		1.3582	1.0888	0.99721	0.80767	1.0697		1.2424	0.89315	0.74966	0.6581	0.48145
2.9056	1.5619	1.2644	0.90786	0.70412		1.6466	1.2564	1.1743	0.98307	0.7567		0.99036	0.67017	0.61154	0.6581	0.77304
3.2637	1.4551	1.0309	0.70604	0.72432		1.5284	1.0332	0.88392	0.76386	0.78411		8.0358	3.5562	2.3504	1.2095	0.67644
2.7792	1.6199	1.3083	0.90786	0.75595		1.668	1.3393	1.2344	0.98307	0.81908		1.759	1.3532	1.2247	0.98862	1.0278
3.5797	1.7659	1.3914	1.1097	1.1462		2.013	1.4481	1.3168	1.2027	1.2455		1.9176	1.4854	1.3721	1.2095	1.6738
3.4946	1.8435	1.421	1.0492	1.0176		1.7047	1.3812	1.2711	1.1368	1.1182		1.8881	1.4385	1.258	0.98862	1.6394
2.5897	1.5827	1.2896	0.9886	1.0561		1.7182	1.3574	1.241	1.0709	1.1457		2.031	1.6403	1.4742	1.099	1.2188
3.5599	1.9449	1.5045	1.0895	1.1355		1.8533	1.4533	1.3309	1.1807	1.2394		1.9708	1.6141	1.5226	1.4308	1.2109
3.4122	1.8336	1.4412	1.0895	0.93651		1.7919	1.3948	1.2898	1.1807	1.0189		2.0703	1.5966	1.4698	1.3201	1.2625
2.8739	1.5911	1.2611	0.92804	1.0202		1.6622	1.3009	1.1861	1.005	1.107		2.3987	1.7257	1.5339	1.3201	0.31341
3.5316	1.8112	1.4075	1.0492	0.91765		1.6592	1.3065	1.2195	1.1368	0.99794		1.1306	1.0731	1.0614	1.099	0.66949
3.5054	1.8622	1.4151	0.96841	0.78858		1.5646	1.278	1.1849	1.0489	0.85019		2.0213	1.5937	1.463	1.3201	0.7865
3.3839	1.8016	1.3815	0.9886	1.0612		1.7717	1.3639	1.2316	1.0709	1.1468		1.8657	1.4568	1.3086	1.099	1.1075
2.6185	1.6139	1.3288	1.029	1.1489		1.5123	1.2795	1.2139	1.1148	1.2572		0.98377	1.0854	1.081	0.98862	1.5812
4.3878	2.0319	1.4794	0.96841	1.0629		1.9783	1.4756	1.2993	1.0489	1.1452		1.5661	0.88416	0.70095	0.54815	1.1401
4.0905	2.0412	1.5511	1.0693	1.111		1.8844	1.4576	1.3406	1.1588	1.1986		2.0395	1.5878	1.4182	1.3201	1.1953
4.6231	2.2346	1.6041	1.029	0.91362		2.1238	1.5899	1.3843	1.1148	0.98783		2.8902	2.0421	1.7202	1.3201	0.91004
2.7453	1.5827	1.2545	0.90786	0.98927		1.454	1.1923	1.1162	0.98307	1.0636		0.96176	0.74158	0.70555	0.76817	0.99377
3.3135	1.8706	1.448	1.0088	1.0229		1.6675	1.3869	1.274	1.0928	1.1113		1.8695	1.5016	1.369	1.2095	0.67607
3.8963	1.863	1.3664	0.88768	1.0476		1.7247	1.3246	1.1867	0.96113	1.1287		2.0033	1.1857	0.96648	0.76817	1.6936
2.975	1.6727	1.3408	1.029	1.029		1.8282	1.4247	1.2971	1.1148	1.1098		2.3566	1.7833	1.6659	1.6526	0.92794
2.8979	1.7389	1.3702	0.94823	0.90225		1.5021	1.2655	1.1879	1.027	0.98965		1.1723	0.92788	0.83298	0.6581	0.75254
3.3912	1.7802	1.3754	0.96841	1.0376		1.9282	1.4499	1.2954	1.0489	1.1206		2.0228	1.4306	1.278	1.099	1.1021
3.4903	1.7791	1.3654	1.0693	1.1004		1.9545	1.4014	1.2505	1.1588	1.1902		3.2093	2.3603	2.0558	1.6526	1.0178
2.9525	1.7749	1.4021	1.0492	1.0065		1.9273	1.4819	1.3173	1.1368	1.1051		1.8354	1.4836	1.3381	0.98862	0.67664
2.5452	1.5749	1.2787	1.0088	1.0362		1.4859	1.2518	1.1732	1.0928	1.1407		2.2473	1.9032	1.7517	1.4308	1.4309
3.8993	2.1148	1.5553	0.9886	0.82478		1.6875	1.3851	1.2574	1.0709	0.90091		2.668	1.5928	1.3232	1.099	1.3857
3.3446	1.7701	1.3142	0.84731	0.82142		1.6857	1.3102	1.1536	0.91727	0.89968		1.7907	1.1871	1.0219	0.87834	1.0788
2.6164	1.5557	1.2443	0.96841	1.3718		1.4648	1.2019	1.1197	1.0489	1.5161		1.6789	1.3995	1.2917	1.099	1.3919
3.7558	1.7839	1.3275	0.88768	0.72765		1.6074	1.2489	1.1384	0.96113	0.78361		1.7467	0.95923	0.83934	0.87834	1.0206
3.9669	1.6898	1.1761	0.7464	0.88844		2.2067	1.3104	1.0607	0.80767	0.95925		0.7109	0.42017	0.39642	0.4383	0.7527
3.2257	1.7915	1.3745	0.94823	0.96003		1.9201	1.42	1.2594	1.027	1.042		1.9662	1.4976	1.3168	0.98862	1.6132
3.9161	2.0623	1.5588	1.1501	1.2363		1.6141	1.3679	1.2893	1.2467	1.34		2.7711	1.9687	1.7537	1.5417	1.4774
3.61	1.7674	1.3323	0.94823	1.0085		2.0019	1.3889	1.2209	1.027	1.0826		1.9298	1.5452	1.4806	1.3201	1.2116
3.4472	1.6279	1.2091	0.88768	1.092		1.771	1.23	1.0785	0.96113	1.2043		0.94371	0.65708	0.61958	0.6581	0.40175
2.8535	1.6238	1.2975	0.94823	0.88738		1.7071	1.3166	1.2041	1.027	0.95872		1.5392	1.0864	0.94747	0.76817	1.5252
2.3685	1.3963	1.0936	0.84731	0.6586		1.3505	1.0673	0.96986	0.91727	0.70791		1.7202	1.399	1.2659	0.98862	0.42903
3.5688	1.8224	1.294	0.88768	0.6558		1.6395	1.223	1.067	0.96113	0.71542		1.8958	1.4918	1.3555	1.2095	0.78172
3.7062	1.8923	1.4016	0.94823	0.97908		2.0883	1.4912	1.2824	1.027	1.0537		2.4108	1.8274	1.5984	1.2095	1.4859
3.4765	1.8613	1.4443	1.1299	1.1003		1.8372	1.4084	1.2877	1.2247	1.178		2.1472	1.5412	1.4356	1.2095	1.2607
3.1502	1.7654	1.3841	1.0492	0.76736		1.6183	1.2961	1.2079	1.1368	0.83824		2.1343	1.605	1.374	0.98862	1.1778
4.6251	2.0427	1.4593	0.92804	0.93321		2.0603	1.4429	1.2594	1.005	1.004		6.4662	3.2282	2.2553	1.099	0.92719
2.7692	1.6894	1.3256	0.96841	0.86653		1.7682	1.4167	1.2581	1.0489	0.93271		3.067	2.5582	2.3638	1.8748	0.68549
3.2555	1.573	1.1541	0.82713	0.69667		1.7389	1.1861	1.0231	0.89534	0.75707		1.4333	1.0043	0.9508	0.98862	0.73861
4.0305	1.9963	1.4291	0.90786	0.73205		1.6444	1.273	1.1407	0.98307	0.79724		0.75028	0.61607	0.57772	0.54815	0.80415
3.4013	1.895	1.4137	0.94823	0.97377		1.7052	1.357	1.2091	1.027	1.0426		1.1674	1.1608	1.1288	0.98862	0.99496
3.6806	1.9671	1.4516	0.96841	0.67309		1.8124	1.3929	1.2364	1.0489	0.7273		1.5321	1.276	1.1547	0.98862	0.4987
4.1516	2.1189	1.607	1.2309	1.3914		2.1374	1.5879	1.4273	1.3347	1.5089		2.8197	2.3738	2.1441	1.7637	1.4578
3.6651	1.8103	1.3777	1.0895	0.77816		1.9014	1.3852	1.2465	1.1807	0.83056		2.1987	1.5015	1.3118	1.099	0.44041
4.1167	2.0877	1.5547	1.029	1.2589		1.885	1.4257	1.2935	1.1148	1.3657		1.6137	1.0123	0.8364	0.6581	0.47463
4.2184	2.2039	1.6045	1.0492	1.1415		1.912	1.4729	1.3173	1.1368	1.2157		2.5827	1.6575	1.4298	1.2095	1.1629
3.1853	1.782	1.3885	0.94823	0.71995		1.4607	1.2484	1.1837	1.027	0.77929		1.3297	1.0366	0.97015	0.87834	0.64502
3.3446	1.8987	1.4843	1.1097	1.1642		1.8048	1.4241	1.3102	1.2027	1.2543		2.044	1.6093	1.5341	1.4308	1.5093
3.8669	2.0813	1.561	0.9886	0.75289		1.7967	1.4527	1.3215	1.0709	0.81314		1.8897	1.3898	1.2225	0.98862	0.55949
4.0721	2.0174	1.5036	0.9886	1.0158		1.8907	1.4727	1.3233	1.0709	1.0921		1.4557	1.1302	1.0217	0.87834	1.3234
3.2985	1.8537	1.4583	1.029	0.98176		1.5366	1.3409	1.2732	1.1148	1.0488		0.85665	0.7337	0.69387	0.6581	0.99731
4.4421	2.2141	1.6099	0.96841	0.93322		1.9252	1.5051	1.3482	1.0489	1.0179		1.3659	0.93175	0.83778	0.76817	0.965
4.0342	2.0589	1.54	1.0895	1.0364		1.8541	1.4691	1.3329	1.1807	1.1204		2.3575	1.6979	1.4896	1.3201	1.4007
2.0633	1.1138	0.85463	0.62532	0.45008		0.95668	0.75173	0.70887	0.6763	0.48944		1.0449	0.93454	0.89089	0.76817	1.1406
3.8128	2.0512	1.5027	1.0492	0.97357		1.8857	1.4536	1.2768	1.1368	1.0604		3.357	2.425	2.0839	1.5417	1.195
3.2908	1.7572	1.3256	0.86749	0.87107		1.6725	1.3376	1.1959	0.9392	0.94466		1.0676	0.76487	0.65717	0.54815	1.1052
4.885	2.3396	1.639	1.0492	1.0568		2.2229	1.5396	1.3237	1.1368	1.1415		2.6768	1.7711	1.4754	1.2095	1.2471
3.4367	1.8002	1.3953	1.0895	1.1196		1.752	1.335	1.2312	1.1807	1.2168		2.0473	1.4747	1.3087	1.099	1.1189
4.7264	2.3388	1.6983	1.1097	1.1553		1.9376	1.4965	1.3585	1.2027	1.2614		2.78	1.8857	1.5756	1.2095	2.1036
4.0596	2.0425	1.5562	1.1905	1.0655		1.792	1.4473	1.3432	1.2907	1.1577		1.1299	1.1867	1.1636	1.2095	1.1668
3.5887	1.9574	1.5646	1.1703	0.98541		1.8563	1.5082	1.4174	1.2687	1.0607		2.3778	1.6862	1.5469	1.4308	1.1273
3.1776	1.865	1.4863	1.0693	1.2875		2.0627	1.5522	1.4001	1.1588	1.3947		1.8964	1.4982	1.3418	0.98862	1.3454
3.3401	1.8802	1.4738	1.1097	0.91487		2.0739	1.5571	1.3884	1.2027	0.98683		2.6829	2.0246	1.7947	1.3201	0.48583
3.7133	1.998	1.5673	1.1501	1.4273		2.1041	1.6255	1.4712	1.2467	1.5585		2.4265	2.0731	1.9284	1.6526	0.8001
4.0852	2.0666	1.5335	1.0895	1.18		2.1388	1.554	1.3667	1.1807	1.2852		3.1336	2.4609	2.1798	1.7637	1.3381
3.9442	1.9837	1.4675	1.1501	1.1445		1.9933	1.4306	1.2699	1.2467	1.2495		2.6282	2.1206	1.9209	1.5417	0.84411
3.7644	1.8366	1.3359	0.92804	0.90358		1.925	1.3559	1.1682	1.005	0.97497		2.0614	1.6432	1.5565	1.4308	1.0578
4.1935	2.1827	1.6137	1.1097	1.2181		2.0989	1.5889	1.4085	1.2027	1.3144		3.5598	2.4023	2.0461	1.5417	1.6592
4.2806	2.0795	1.5125	0.9886	0.88095		1.795	1.3984	1.2609	1.0709	0.94997		0.93068	0.66871	0.60176	0.54815	0.71254
4.3413	2.2083	1.626	1.0693	1.0397		1.9165	1.4928	1.3473	1.1588	1.1165		2.5023	1.5989	1.29	0.98862	1.6391
4.5412	2.2886	1.6623	0.90786	0.7745		1.9979	1.6041	1.424	0.98307	0.83487		3.0101	1.8846	1.4081	0.87834	0.49951
3.7355	1.8925	1.4845	1.0895	0.9875		2.1045	1.5111	1.3695	1.1807	1.0672		2.8603	1.8021	1.5005	1.099	0.50504
4.0234	2.145	1.5892	1.0492	1.0355		1.9856	1.5408	1.3647	1.1368	1.1253		2.2199	1.8106	1.6565	1.4308	0.72306
2.469	1.4869	1.2077	0.96841	0.85762		1.6547	1.2936	1.1765	1.0489	0.92781		1.1718	0.98761	0.9311	0.87834	0.67069
3.0689	1.8761	1.4956	1.0895	1.1984		1.6208	1.3751	1.2942	1.1807	1.2965		2.5005	1.9806	1.7974	1.4308	1.4005
3.6013	1.8011	1.3652	1.0895	1.2493		2.0075	1.3757	1.2175	1.1807	1.3553		3.2574	2.2252	1.9697	1.6526	0.69372
3.8578	1.9029	1.4361	0.92804	0.95452		1.7067	1.3391	1.2301	1.005	1.0397		4.1409	2.0426	1.5099	0.98862	0.68671
3.1849	1.7762	1.415	0.96841	1.0018		2.0352	1.4988	1.3482	1.0489	1.0872		0.9601	0.70572	0.60578	0.4383	1.3186
3.9937	1.7415	1.2515	0.82713	0.85158		1.9971	1.2408	1.0646	0.89534	0.92758		4.1559	1.8599	1.1767	0.4383	0.74088
4.3551	1.8062	1.3035	0.88768	0.98095		2.7493	1.587	1.2866	0.96113	1.0626		0.41243	0.41795	0.42409	0.4383	1.2577
3.8174	2.0743	1.6083	1.1299	1.0535		2.1217	1.6497	1.4825	1.2247	1.1512		1.5798	1.2028	1.1104	1.099	1.3696
3.4956	1.8811	1.4806	1.1097	1.0516		1.8512	1.4606	1.3515	1.2027	1.1412		0.92596	0.83919	0.84785	0.87834	1.2676
2.9066	1.6411	1.2854	0.90786	0.97124		1.8581	1.3974	1.2397	0.98307	1.0515		2.6914	2.0484	1.7807	1.3201	0.60889
3.4562	1.9336	1.4878	1.0895	1.1306		1.9441	1.5108	1.3498	1.1807	1.2154		2.0973	1.7759	1.647	1.3201	1.1033
3.9651	2.0981	1.6193	1.1299	0.98112		1.91	1.5384	1.4195	1.2247	1.0513		2.5114	1.835	1.604	1.3201	1.0422
4.3837	2.1652	1.6313	1.2309	1.1765		2.2604	1.648	1.47	1.3347	1.2792		2.0592	1.6065	1.4606	1.3201	1.1254
4.5798	2.2415	1.6389	1.1501	0.93562		2.2774	1.6567	1.4405	1.2467	1.0257		2.2086	1.5939	1.3975	1.099	1.8159
4.5585	1.9347	1.3615	0.92804	0.89983		2.1726	1.4083	1.1888	1.005	0.96112		4.4731	1.9563	1.4054	0.87834	0.92784
4.213	2.2523	1.7164	1.1097	0.96665		2.1823	1.7361	1.5599	1.2027	1.0495		1.6161	1.3115	1.1789	0.98862	1.4499
4.6678	2.316	1.7034	1.0693	1.1086		2.1072	1.6066	1.4391	1.1588	1.1962		1.4402	0.99347	0.82979	0.6581	1.6727
4.4346	2.3326	1.7717	1.1905	0.9185		1.9776	1.6339	1.5181	1.2907	0.99688		3.7405	2.3466	2.0656	1.8748	0.72042
4.3124	2.2431	1.6494	1.029	1.0252		2.1553	1.6991	1.4896	1.1148	1.0959		1.3527	0.98113	0.87729	0.76817	0.78664
3.1517	1.3448	0.95223	0.6455	0.63375		1.727	1.0595	0.8732	0.69818	0.69779		12.594	5.2878	2.3455	0.76817	0.4644
4.6142	2.3174	1.7289	1.1703	1.169		2.3607	1.8007	1.587	1.2687	1.267		4.5668	2.8824	2.3359	1.6526	1.2698
2.9469	1.3145	0.92257	0.58497	0.59212		2.3631	1.4695	1.1873	0.85881	0.87592		4.0142	2.5241	1.7562	0.7302	0.77797
1.9041	0.97995	0.75942	0.58497	0.52056		1.5873	1.1326	0.99892	0.85881	0.75686		2.7293	1.7903	1.3143	0.7302	0.93177
1.8149	0.95056	0.72394	0.48409	0.35297		1.6704	1.1555	0.98472	0.71044	0.52023		1.9571	1.2999	1.0177	0.6257	0.34268
2.0839	1.0244	0.7413	0.52444	0.42646		1.909	1.2219	0.99523	0.76977	0.62555		2.7158	1.5827	1.1618	0.52126	0.80275
2.3808	1.0262	0.75999	0.58497	0.52949		1.9078	1.1489	0.98171	0.85881	0.77345		4.0516	2.1139	1.4878	0.93938	0.69319
2.1923	1.0492	0.77287	0.52444	0.55535		1.9921	1.2485	1.0288	0.76977	0.81044		4.2337	2.5573	1.7786	0.7302	0.92204
2.088	0.97122	0.71306	0.50426	0.46671		1.9601	1.1995	0.97707	0.7401	0.68147		1.5372	0.89901	0.67544	0.41689	0.46009
2.3905	1.1265	0.8141	0.62532	0.77633		2.3313	1.3866	1.1171	0.91819	1.1302		4.5621	2.607	1.9584	1.1488	1.2253
2.1437	1.0009	0.7135	0.52444	0.65025		2.0427	1.2041	0.95969	0.76977	0.95556		4.7485	2.563	1.7523	0.93938	1.3551
2.4437	1.1413	0.86353	0.6455	0.56163		2.0363	1.3289	1.1428	0.94789	0.80775		1.7033	1.0853	0.869	0.6257	0.4674
1.9659	1.056	0.82413	0.66568	0.93705		1.9619	1.3359	1.1548	0.97759	1.3805		1.9328	1.2237	0.98181	0.7302	0.99774
2.5187	1.2524	0.92989	0.68586	0.71106		2.2788	1.5024	1.2498	1.0073	1.0272		4.8279	3.2736	2.3499	1.1488	1.0767
2.6724	1.2509	0.92111	0.58497	0.68857		2.1335	1.4467	1.2173	0.85881	0.99992		4.4179	2.6358	1.8024	0.83476	1.0188
2.7616	1.2433	0.91932	0.60514	0.67308		1.8143	1.2896	1.1385	0.8885	0.9871		2.2561	1.738	1.2219	0.6257	0.71076
2.6328	1.3473	1.0182	0.68586	0.58857		2.4779	1.6452	1.3768	1.0073	0.85725		3.0542	2.2586	1.7688	0.7302	1.1473
2.6728	1.2984	0.97793	0.72622	0.83312		2.3247	1.5189	1.2923	1.0667	1.2246		3.0923	1.8444	1.3312	0.7302	1.0076
2.7943	1.3364	0.98141	0.66568	0.62272		2.2364	1.5094	1.2733	0.97759	0.91133		3.7834	2.1876	1.4694	0.7302	0.68454
3.3926	1.5416	1.1143	0.66568	0.88912		2.4895	1.6653	1.4038	0.97759	1.3053		3.3511	1.9322	1.2025	0.41689	1.543
2.5746	1.2966	0.97827	0.66568	0.44119		2.009	1.4257	1.2424	0.97759	0.64965		1.773	1.1369	0.82313	0.41689	1.0969
3.1089	1.3912	0.9907	0.6455	0.80341		2.0813	1.446	1.2342	0.94789	1.1841		3.1681	2.5062	1.7961	0.7302	1.6711
2.9631	1.3347	0.98266	0.70604	0.65642		2.2173	1.4557	1.2538	1.037	0.96724		3.855	2.21	1.5417	0.83476	0.86889
2.4668	1.2676	0.97456	0.7464	0.64976		2.4609	1.592	1.3517	1.0965	0.93945		4.4574	2.6766	2.0394	1.2536	1.1084
2.4984	1.2415	0.94986	0.70604	0.63311		2.0697	1.4273	1.2461	1.037	0.92755		1.9184	1.4826	1.116	0.52126	0.38084
3.3492	1.5859	1.1165	0.66568	0.59544		2.4336	1.6819	1.3943	0.97759	0.87029		5.2591	3.7749	2.6741	1.1488	0.7229
4.5357	1.8738	1.202	0.6455	0.56106		2.7933	1.8093	1.424	0.94789	0.82425		3.9134	3.3142	2.4025	0.83476	0.54625
2.0041	1.1115	0.88723	0.78676	0.8587		1.9625	1.3904	1.2219	1.1559	1.2473		2.6046	1.858	1.4982	0.83476	0.9979
2.1547	1.1836	0.93861	0.6455	0.55469		2.1997	1.5187	1.3062	0.94789	0.81891		2.0047	1.3289	1.0213	0.6257	0.99149
2.3067	1.2017	0.92771	0.62532	0.44899		1.7435	1.3328	1.1952	0.91819	0.65355		3.3981	2.2248	1.6085	0.83476	0.42848
2.4323	1.0842	0.79535	0.60514	0.58991		1.8806	1.2139	1.0307	0.8885	0.85527		3.1087	1.9571	1.4164	0.83476	0.82192
2.0192	1.1043	0.85755	0.60514	0.6142		1.8847	1.3325	1.1547	0.8885	0.90968		2.9096	2.0534	1.6699	1.0441	1.5798
2.9085	1.2847	0.95045	0.70604	0.57844		2.5433	1.5327	1.2713	1.037	0.85085		4.7294	2.4857	1.7736	1.0441	1.3157
3.1884	1.3533	0.96373	0.60514	0.58607		1.8632	1.3398	1.1641	0.8885	0.86505		5.4926	3.2333	1.9841	0.93938	0.60307
2.5498	1.2939	0.96699	0.68586	0.77746		2.2922	1.5242	1.2866	1.0073	1.1415		2.5197	1.6471	1.2715	0.7302	1.0231
3.7414	1.4919	1.0382	0.70604	0.82613		2.5609	1.5998	1.3238	1.037	1.2069		3.1452	1.7879	1.3745	1.0441	0.75144
2.1727	1.1985	0.93111	0.58497	0.50884		1.8949	1.3928	1.2191	0.85881	0.73576		1.6573	0.96695	0.69326	0.31257	0.49773
4.1104	1.7648	1.1906	0.70604	0.62029		3.0928	1.9207	1.5107	1.037	0.91068		8.4471	5.3266	3.6126	1.2536	1.1912
3.0962	1.442	1.0482	0.7464	0.99826		2.5898	1.6498	1.3652	1.0965	1.4646		5.4327	3.7695	2.8175	1.4634	1.9204
2.9006	1.2521	0.87677	0.62532	0.69221		2.2298	1.3856	1.1328	0.91819	1.016		4.1673	2.812	2.0721	1.0441	1.3505
2.1683	0.98989	0.74869	0.58497	0.75586		2.0644	1.2631	1.0511	0.85881	1.0903		1.2165	0.78338	0.61935	0.41689	1.4957
2.3525	1.1715	0.86144	0.62532	0.44271		1.9616	1.3702	1.1596	0.91819	0.64429		2.8227	1.989	1.616	1.0441	0.30964
1.9999	0.97022	0.75197	0.60514	0.56958		1.6	1.1253	1.0029	0.8885	0.82698		3.0573	2.0857	1.7177	1.2536	0.82697
2.1915	1.0763	0.82307	0.62532	0.76946		1.8941	1.3053	1.1256	0.91819	1.126		2.54	1.9054	1.6531	1.2536	1.0103
2.8027	1.2253	0.87972	0.68586	0.66841		2.3166	1.3974	1.1528	1.0073	0.97057		4.2326	2.7969	2.2206	1.4634	1.2103
2.3177	1.0648	0.81419	0.6455	0.47261		1.9781	1.2776	1.1105	0.94789	0.69894		2.2656	1.4479	1.1717	0.83476	0.83865
2.2868	1.0539	0.79882	0.62532	0.57306		1.7397	1.1877	1.0473	0.91819	0.82465		2.6048	1.7152	1.3972	1.0441	0.58395
2.4565	1.1111	0.84358	0.70604	0.69999		1.9084	1.2568	1.1055	1.037	1.0342		2.731	1.7516	1.4116	1.0441	1.2061
2.032	1.0233	0.77279	0.58497	0.35164		1.6069	1.1818	1.031	0.85881	0.52279		2.0432	1.2811	1.0025	0.7302	0.52995
2.8599	1.1926	0.85847	0.6455	0.60182		1.9911	1.2811	1.0928	0.94789	0.87706		2.2466	1.5118	1.1972	0.83476	0.7692
2.4479	1.1424	0.83253	0.68586	0.77186		1.7656	1.2343	1.0654	1.0073	1.1358		3.4533	2.6292	2.2429	1.7786	0.89209
1.9101	0.9641	0.75481	0.62532	0.53269		1.6442	1.1551	1.0245	0.91819	0.78314		1.3608	1.0086	0.83448	0.52126	0.6873
1.9191	0.99597	0.75932	0.56479	0.52995		1.6221	1.1565	1.0057	0.82913	0.78104		2.4065	1.7747	1.4339	0.93938	0.88328
2.1509	1.0342	0.77092	0.58497	0.58356		1.5055	1.1067	0.97765	0.85881	0.8516		3.0243	1.8616	1.3654	0.93938	0.45605
2.2829	1.1547	0.8476	0.68586	0.67101		2.2144	1.4258	1.1658	1.0073	0.97977		4.2389	2.9508	2.4259	1.5684	1.0731
2.7339	1.1925	0.85073	0.66568	0.74525		1.9553	1.2923	1.0946	0.97759	1.0895		4.8656	3.1857	2.5265	1.7786	0.91823
3.0202	1.2129	0.86089	0.66568	0.71178		2.1949	1.3717	1.1373	0.97759	1.0348		3.1601	2.0889	1.6182	1.0441	1.1264
1.7046	0.89869	0.72563	0.60514	0.60246		1.4857	1.1032	1.0016	0.8885	0.89308		2.0727	1.3858	1.1871	1.0441	0.79171
1.7816	0.87946	0.70539	0.6455	0.38992		1.6356	1.0983	0.98407	0.94789	0.5729		2.2527	1.4836	1.2848	1.1488	0.14898
2.1218	1.0167	0.77093	0.58497	0.44476		1.9996	1.3121	1.1039	0.85881	0.65319		2.6895	1.7089	1.3582	0.93938	0.36604
3.0465	1.2648	0.89103	0.62532	0.76165		2.0285	1.3207	1.1171	0.91819	1.1278		4.0755	2.3138	1.6032	0.93938	1.3441
2.09	1.0038	0.76175	0.60514	0.54012		1.792	1.2163	1.0522	0.8885	0.78851		1.8871	1.3854	1.1794	0.83476	0.90609
1.7206	0.91671	0.6957	0.56479	0.52983		1.738	1.2135	1.0122	0.82913	0.77567		3.4331	2.3415	1.8981	1.1488	0.88868
1.7269	0.91633	0.69784	0.54461	0.56148		1.4534	1.0764	0.93629	0.79945	0.82171		2.3814	1.8566	1.5822	1.1488	1.0217
1.8546	0.95217	0.73605	0.56479	0.53218		2.0958	1.3313	1.101	0.82913	0.78644		3.9518	2.5138	2.0345	1.2536	0.3833
2.2037	1.0045	0.75783	0.60514	0.7989		1.9531	1.2566	1.0603	0.8885	1.1576		3.4796	2.0336	1.5563	1.0441	0.65899
2.4749	1.1379	0.82518	0.56479	0.58788		2.2227	1.3443	1.1042	0.82913	0.86134		4.1539	2.6116	1.9767	1.1488	0.77165
2.7518	1.1396	0.79638	0.50426	0.5411		1.8392	1.2061	1.011	0.7401	0.79449		2.9013	1.9908	1.5507	0.93938	0.63199
2.2759	0.97772	0.69405	0.50426	0.48316		1.6923	1.0857	0.90629	0.7401	0.70076		2.4862	1.5813	1.2804	0.93938	0.56243
1.7375	0.90933	0.7048	0.52444	0.65176		1.6003	1.1234	0.9725	0.76977	0.96533		2.3044	1.6696	1.451	1.1488	0.32399
2.0027	0.9361	0.71306	0.62532	0.77675		1.5154	1.0459	0.92947	0.91819	1.1356		3.2165	2.1071	1.7914	1.4634	0.98925
2.5503	1.1045	0.78951	0.60514	0.70568		1.6865	1.1379	0.98258	0.8885	1.0246		3.4246	2.2733	1.8458	1.3585	1.7386
2.164	1.0973	0.84709	0.70604	0.72362		2.096	1.3843	1.1845	1.037	1.0599		3.7323	2.6226	2.2137	1.6735	1.3295
2.4894	1.1736	0.87309	0.70604	0.69323		1.913	1.311	1.1386	1.037	1.0205		4.6411	3.2953	2.6669	1.7786	0.97072
3.0344	1.2218	0.85197	0.58497	0.62254		2.0373	1.3021	1.0759	0.85881	0.90985		3.1343	2.1488	1.5907	1.0441	0.71711
2.8886	1.2054	0.85825	0.56479	0.59396		2.1139	1.3422	1.1115	0.82913	0.87628		2.2084	1.4171	1.1263	0.83476	1.1113
1.8857	1.0074	0.80708	0.66568	0.57494		2.0895	1.4454	1.2362	0.97759	0.84188		2.3652	1.7768	1.622	1.4634	0.5419
2.1794	1.0619	0.81236	0.6455	0.58797		1.9749	1.3373	1.1357	0.94789	0.85769		2.4065	1.6779	1.4033	1.0441	1.026
2.0482	0.9506	0.72205	0.58497	0.50122		1.6592	1.1009	0.96194	0.85881	0.733		3.7422	2.3738	1.8841	1.2536	1.1785
4.5126	1.5443	0.98742	0.58497	0.52613		3.2341	1.7723	1.3107	0.85881	0.76706		5.8976	3.6652	2.6347	1.3585	0.57614
2.6677	1.2109	0.88802	0.72622	0.81846		2.1573	1.3763	1.1612	1.0667	1.187		3.8365	2.4622	2.0582	1.6735	1.7208
2.1655	0.94715	0.70217	0.62532	0.60863		1.7908	1.097	0.93309	0.91819	0.90687		3.4641	2.2926	1.9209	1.4634	1.2456
1.621	0.83565	0.63761	0.52444	0.48749		1.6884	1.1044	0.92064	0.76977	0.71659		2.4243	1.6394	1.3582	0.93938	0.6905
2.6463	1.1119	0.7858	0.54461	0.44766		1.9069	1.2193	1.0146	0.79945	0.65218		3.3949	2.1876	1.671	1.0441	0.88916
2.8763	1.1728	0.82748	0.66568	0.67388		2.194	1.3387	1.0971	0.97759	0.99186		3.8706	2.4438	1.9049	1.2536	0.82283
2.5045	1.1107	0.80103	0.52444	0.47071		2.1689	1.3762	1.1126	0.76977	0.69162		1.9674	1.1202	0.8626	0.6257	0.34329
2.0397	1.0234	0.78245	0.56479	0.70408		1.6632	1.1795	1.0391	0.82913	1.0046		1.6879	1.1622	0.95051	0.6257	1.2145
2.6704	1.1305	0.78414	0.48409	0.48854		1.8035	1.1671	0.97372	0.71044	0.70656		0.39015	0.26925	0.19183	0.10413	0.55909
3.0052	1.1353	0.76371	0.42356	0.46776		1.9215	1.1824	0.94844	0.62148	0.68276		2.3545	0.90656	0.5437	0.31257	0.99511
2.4853	0.96797	0.66091	0.40339	0.49976		1.4781	0.96842	0.80858	0.59184	0.72499		1.0477	0.64884	0.40468	0.20832	0.066991
2.088	0.88565	0.62022	0.40339	0.35361		1.3897	0.91729	0.76637	0.59184	0.52206		1.3391	0.37975	0.21831	0.10413	0.81938
1.7502	0.83908	0.60305	0.40339	0.30792		1.5331	0.97368	0.79346	0.59184	0.44796		2.676	1.701	1.2656	0.6257	0.099435
2.0519	0.8931	0.62274	0.48409	0.41421		1.6667	1.0239	0.82488	0.71044	0.60401		3.4007	2.1318	1.5624	0.83476	0.4359
1.7837	0.82211	0.56785	0.42356	0.43101		1.2522	0.8657	0.71711	0.62148	0.63834		2.0752	1.4461	1.109	0.7302	0.78241
2.2686	0.91603	0.60553	0.44374	0.38273		1.4588	0.93978	0.75999	0.65113	0.56038		3.764	2.7361	2.0031	1.1488	0.8426
1.9972	0.94837	0.65319	0.46391	0.51297		1.2438	0.93399	0.79854	0.68078	0.74805		1.3906	1.0627	0.8784	0.6257	0.95865
2.1522	0.88453	0.61652	0.44374	0.4871		1.3816	0.91322	0.7699	0.65113	0.71106		2.5029	1.3922	0.97054	0.6257	0.91953
1.3282	0.64707	0.47304	0.42356	0.39942		1.1553	0.74474	0.62481	0.62148	0.57727		2.3791	1.8005	1.5509	1.1488	1.1878
4.0671	1.6964	1.0322	0.48409	0.49303		2.507	1.6267	1.2199	0.71044	0.7298		5.9905	4.9967	3.8235	1.2536	0.73986
2.1866	0.90955	0.60089	0.38321	0.40024		1.5827	0.97307	0.76405	0.5622	0.588		3.8234	2.8208	2.1707	1.1488	0.94032
2.3278	0.90889	0.58685	0.38321	0.49682		1.4454	0.89929	0.71038	0.5622	0.72545		3.7431	2.8109	2.005	0.83476	1.0698
2.1486	0.91506	0.6499	0.40339	0.39144		1.5002	0.96325	0.81429	0.59184	0.57391		1.4895	0.79991	0.601	0.41689	0.2217
0.95927	0.57311	0.47145	0.40339	0.40225		1.3375	0.87098	0.73696	0.59184	0.5935		1.4568	1.0328	0.85137	0.52126	0.59839
2.3896	0.98928	0.67096	0.44374	0.41109		1.7774	1.0796	0.85818	0.65113	0.60362		1.9981	1.2812	0.92616	0.41689	0.62838
2.0261	0.94891	0.69898	0.50426	0.5849		1.7308	1.0997	0.9187	0.7401	0.84148		2.2386	1.4095	1.1028	0.6257	1.0661
2.3782	1.0487	0.72764	0.48409	0.55658		1.9894	1.1877	0.94484	0.71044	0.80985		5.2603	2.9526	2.0538	1.0441	0.88972
1.8536	0.93014	0.67382	0.48409	0.43837		1.9818	1.2266	0.96429	0.71044	0.64241		3.4215	2.2044	1.7146	0.93938	0.37079
1.6548	0.81805	0.62747	0.50426	0.4806		1.3686	0.93419	0.82281	0.7401	0.71276		3.6839	1.9577	1.4032	0.93938	0.51762
1.5915	0.83726	0.64083	0.46391	0.51256		1.482	1.0217	0.87354	0.68078	0.74148		3.6184	2.1751	1.6357	0.93938	0.13041
3.349	1.329	0.90876	0.6455	0.73197		2.2853	1.41	1.144	0.94789	1.0773		4.8388	3.1497	2.2083	1.2536	1.8216
1.6484	0.81593	0.60742	0.40339	0.30868		1.4673	0.97401	0.81408	0.59184	0.45171		1.4593	0.8316	0.62336	0.41689	0.12856
1.9003	0.83677	0.59543	0.44374	0.49408		1.5416	0.94216	0.7726	0.65113	0.72095		2.5396	1.6897	1.3148	0.83476	0.77544
2.4337	1.1394	0.7625	0.54461	0.68095		2.1589	1.3547	1.0315	0.79945	0.99598		5.2782	3.7725	3.0868	1.8838	1.151
2.1969	1.0377	0.79028	0.6455	0.72324		1.471	1.0763	0.98349	0.94789	1.0608		2.4142	1.875	1.697	1.5684	1.1658
2.105	1.0223	0.74146	0.56479	0.61715		1.9098	1.2616	1.0279	0.82913	0.90019		3.4566	2.6283	2.2372	1.5684	0.74948
1.8963	0.9796	0.74395	0.56479	0.56843		1.5598	1.1417	0.99279	0.82913	0.83684		1.5863	1.0327	0.79814	0.52126	0.97524
2.16	0.94155	0.68688	0.56479	0.69383		1.7994	1.1201	0.93369	0.82913	1.0138		2.0312	1.3772	1.2076	1.0441	1.2511
2.9455	1.2816	0.86522	0.60514	0.73892		1.8919	1.2865	1.0597	0.8885	1.0903		3.5928	2.7916	2.3065	1.5684	1.4373
2.6686	1.2895	0.94541	0.68586	0.51909		1.8315	1.3293	1.1604	1.0073	0.75737		2.7084	1.8422	1.3923	0.93938	1.1932
2.3117	1.1634	0.91467	0.72622	0.8298		2.0294	1.4015	1.2379	1.0667	1.2211		2.2468	1.2332	1.0704	1.0441	1.2802
2.6691	1.2456	0.91723	0.68586	0.67238		2.0279	1.3882	1.191	1.0073	0.9833		2.6024	1.6879	1.3594	0.93938	1.3307
2.5805	1.1616	0.85334	0.58497	0.42762		1.7035	1.204	1.064	0.85881	0.62647		1.2315	0.74113	0.52876	0.31257	0.82356
2.1465	1.0645	0.80005	0.56479	0.49918		1.8234	1.2261	1.0488	0.82913	0.72645		3.3359	1.9685	1.5192	1.0441	0.77275
3.3493	1.3526	0.91937	0.58497	0.45953		1.886	1.2917	1.0944	0.85881	0.67361		3.1613	2.4563	1.8189	0.83476	1.4097
2.271	1.0481	0.7791	0.56479	0.39214		1.796	1.1973	1.026	0.82913	0.57733		3.4323	1.9194	1.3606	0.7302	0.73725
3.0824	1.2755	0.86181	0.50426	0.46912		1.8624	1.2321	1.0221	0.7401	0.68445		2.1773	1.644	1.1288	0.31257	0.85507
3.336	1.5213	1.0128	0.60514	0.56509		2.5116	1.6256	1.2722	0.8885	0.82793		4.3967	3.3194	2.5541	1.1488	0.5182
4.2948	1.7131	1.0787	0.6455	0.5864		2.4978	1.571	1.2385	0.94789	0.85559		4.8157	3.7254	2.8154	1.3585	0.43561
3.0104	1.3299	0.91936	0.62532	0.60413		2.534	1.515	1.2026	0.91819	0.87552		5.5346	3.6053	2.7287	1.6735	0.67341
3.8753	1.5312	0.99397	0.56479	0.54181		2.2489	1.4928	1.1983	0.82913	0.79496		4.049	3.0766	2.0435	0.7302	0.29804
2.7966	1.1642	0.82345	0.62532	0.69848		2.1443	1.3086	1.0741	0.91819	1.0246		5.2919	2.9306	2.0488	1.2536	1.2064
2.8954	1.2896	0.88269	0.58497	0.54904		2.1273	1.4078	1.1335	0.85881	0.80815		4.6757	3.1679	2.3531	1.2536	0.77901
3.5074	1.6216	1.101	0.58497	0.55037		2.1551	1.5759	1.3044	0.85881	0.81539		3.2625	2.8094	2.0227	0.52126	0.88637
2.915	1.3807	1.0042	0.62532	0.79511		1.7302	1.3349	1.1936	0.91819	1.1697		1.6511	1.2779	0.95626	0.52126	1.621
3.2331	1.4	0.99895	0.62532	0.75781		2.0846	1.4514	1.2346	0.91819	1.0976		1.7997	1.2287	1.0186	0.83476	0.67653
2.6198	1.1251	0.81603	0.62532	0.57506		1.7111	1.1803	1.0227	0.91819	0.84587		2.0165	1.4324	1.217	1.0441	1.138
2.3946	1.1316	0.84941	0.60514	0.56552		1.6862	1.2109	1.0722	0.8885	0.83511		1.4422	1.03	0.8671	0.7302	0.94584
2.6965	1.1986	0.88313	0.6455	0.71992		2.244	1.4033	1.1794	0.94789	1.0543		2.9352	1.8174	1.5117	1.1488	0.87309
2.3857	1.1231	0.85428	0.6455	0.79524		1.7299	1.215	1.0873	0.94789	1.1737		2.2886	1.5032	1.1948	0.93938	1.4738
2.5522	1.1533	0.80115	0.48409	0.5349		1.8618	1.2408	1.0099	0.71044	0.77779		4.8545	3.2494	2.2836	0.93938	0.37125
2.8891	1.2872	0.96173	0.7464	0.65474		2.2871	1.484	1.2722	1.0965	0.95723		4.9987	2.9427	2.2232	1.3585	1.052
3.2071	1.461	1.0167	0.66568	0.64468		2.2558	1.5389	1.2655	0.97759	0.93594		5.3979	3.9345	2.8804	1.4634	1.2748
3.3621	1.4432	0.99429	0.62532	0.53946		2.2134	1.5054	1.246	0.91819	0.78545		4.8534	3.3504	2.4751	1.2536	1.076
4.0738	1.6802	1.1006	0.68586	0.6469		2.4067	1.6177	1.3126	1.0073	0.94149		6.2306	4.6951	3.4567	1.6735	0.72434
2.5388	1.1849	0.87953	0.70604	0.72721		2.2326	1.4666	1.2262	1.037	1.0653		3.9766	2.6777	2.1776	1.4634	0.92672
2.8	1.2176	0.8561	0.60514	0.79151		2.0461	1.3296	1.1036	0.8885	1.1589		2.705	1.9057	1.5947	1.1488	1.0551
2.533	1.203	0.90324	0.68586	0.68782		2.012	1.4026	1.2158	1.0073	1.0168		3.3135	2.218	1.7235	1.1488	1.2891
3.9549	1.617	1.0798	0.68586	0.79736		2.5391	1.6522	1.3364	1.0073	1.1528		4.4421	2.9656	2.3626	1.6735	0.61018
3.2689	1.4141	0.95718	0.6455	0.67796		2.261	1.5037	1.2238	0.94789	0.9892		3.0876	2.2409	1.71	0.83476	0.8578
2.8163	1.2942	0.91609	0.60514	0.56862		2.05	1.4093	1.1652	0.8885	0.83094		4.0558	2.9277	2.2982	1.3585	0.79922
2.35	1.1494	0.80634	0.50426	0.5291		1.8261	1.2198	0.9999	0.7401	0.76942		3.3559	2.5436	2.0373	1.1488	0.74845
2.77	1.1522	0.79119	0.56479	0.55168		2.1165	1.3027	1.0462	0.82913	0.801		4.2709	2.9304	2.2808	1.5684	0.50731
1.6538	0.83378	0.65502	0.54461	0.56517		1.1861	0.90051	0.82919	0.79945	0.82966		2.0829	1.5491	1.2005	0.83476	1.3531
1.7817	0.90828	0.68976	0.60514	0.65026		1.269	0.98359	0.88262	0.8885	0.95366		4.4108	3.0921	2.4152	1.5684	1.0435
1.487	0.80176	0.62917	0.50426	0.47297		1.3511	0.96365	0.84983	0.7401	0.68869		1.9223	1.5572	1.4017	1.1488	0.97995
2.6639	1.0706	0.74948	0.50426	0.3509		1.6663	1.0899	0.93156	0.7401	0.51056		2.1217	1.1693	0.78257	0.41689	0.44727
2.9438	1.2112	0.82549	0.52444	0.33418		1.6876	1.1771	0.9985	0.76977	0.48928		3.2579	2.2528	1.4828	0.6257	0.25602
2.9163	1.2262	0.8666	0.54461	0.38081		1.9281	1.275	1.0766	0.79945	0.55398		0.88115	0.60387	0.48202	0.41689	0.49924
2.7869	1.1312	0.78511	0.50426	0.34905		1.8048	1.2021	1.0082	0.7401	0.51306		1.815	0.993	0.68694	0.41689	0.37206
4.2437	1.87	1.2235	0.70604	0.52088		2.4503	1.7611	1.4516	1.037	0.75588		4.9014	4.0096	2.8855	1.0441	0.92691
2.7761	1.2853	0.94599	0.7464	0.76826		2.0952	1.4439	1.2525	1.0965	1.1258		2.8598	1.8313	1.4641	1.1488	1.2435
3.3581	1.5196	1.0909	0.72622	0.73276		2.0894	1.5319	1.3431	1.0667	1.0747		4.0274	2.8384	1.9987	1.0441	1.2554
3.5979	1.5435	1.0965	0.76658	0.72903		2.5535	1.656	1.3789	1.1262	1.0635		4.6452	2.794	1.864	0.83476	0.99153
1.6141	0.81311	0.61064	0.46391	0.37367		1.5444	1.0209	0.84733	0.68078	0.54378		2.8552	1.9609	1.5274	0.7302	0.39494
1.6299	0.75613	0.58241	0.54461	0.57958		1.3824	0.90872	0.79633	0.79945	0.85502		1.9399	1.292	1.1057	0.93938	0.68872
1.9025	0.81967	0.59727	0.50426	0.54635		1.4409	0.92195	0.78517	0.7401	0.79279		1.7732	1.3015	1.1383	0.93938	0.19816
2.241	0.94873	0.66624	0.50426	0.41799		1.4624	0.96987	0.82592	0.7401	0.61423		3.129	2.1987	1.7496	1.1488	0.28022
1.7733	0.82784	0.62526	0.52444	0.59147		1.5322	0.99813	0.85265	0.76977	0.86046		2.4506	1.7551	1.4706	1.0441	1.0978
2.3347	1.0141	0.69538	0.50426	0.41788		1.7713	1.1409	0.91697	0.7401	0.61313		4.8635	3.1332	2.4199	1.4634	0.45474
1.6066	0.81547	0.62347	0.50426	0.46192		1.5248	1.0471	0.89025	0.7401	0.67526		4.2717	2.6182	2.069	1.3585	0.84417
1.8376	0.81308	0.59243	0.46391	0.52665		1.5582	0.98342	0.81633	0.68078	0.77146		3.2253	2.0328	1.655	1.1488	0.71448
2.6035	1.0729	0.73764	0.50426	0.33395		1.8422	1.1584	0.94584	0.7401	0.48407		4.7507	3.0672	2.2908	1.2536	0.53206
2.426	1.1204	0.78872	0.52444	0.66805		1.9604	1.2895	1.0489	0.76977	0.9696		2.8129	2.0461	1.6071	0.83476	1.071
2.8185	1.3956	1.0683	0.7464	0.69089		2.292	1.6241	1.4231	1.0965	1.0099		3.1232	1.8922	1.4127	0.93938	0.69501
2.8299	1.3584	1.009	0.68586	0.52306		2.1702	1.4749	1.2819	1.0073	0.77156		2.5607	1.7921	1.4389	0.93938	0.6045
2.8223	1.2609	0.91116	0.6455	0.68007		2.0469	1.3865	1.1765	0.94789	0.99459		2.7547	1.6919	1.3014	0.83476	0.97339
3.53	1.4729	1.0088	0.60514	0.56536		2.4096	1.5717	1.2842	0.8885	0.82149		2.3116	1.496	1.1233	0.6257	1.2807
4.4599	1.6949	1.124	0.6455	0.71387		2.6436	1.7017	1.3778	0.94789	1.0285		5.5939	3.3526	2.0976	0.7302	0.77246
2.2477	1.0403	0.77964	0.66568	0.69516		2.0357	1.3116	1.102	0.97759	1.0204		2.9054	1.751	1.4291	1.1488	0.71705
4.6859	1.9079	1.262	0.78676	0.59442		2.7428	1.8669	1.5218	1.1559	0.86543		3.2547	2.8061	2.0346	1.0441	0.55298
2.2569	1.1247	0.87998	0.68586	0.96163		1.9827	1.3455	1.1938	1.0073	1.4054		2.8489	1.6225	1.1697	0.7302	1.1481
3.5331	1.717	1.1937	0.76658	0.75223		2.7662	1.8711	1.5163	1.1262	1.1003		3.2635	2.3153	1.7325	0.93938	0.6233
1.4071	0.65037	0.48726	0.40339	0.32593		1.0552	0.72466	0.63641	0.59184	0.47058		2.2458	1.4714	1.1906	0.83476	0.89691
2.5458	1.3423	1.0098	0.76658	0.97744		2.7162	1.8294	1.4847	1.1262	1.436		4.7347	3.3416	2.7743	1.6735	1.2087
2.5723	1.2238	0.91687	0.68586	0.75721		2.3351	1.5069	1.2669	1.0073	1.1174		3.6932	2.6749	2.2208	1.4634	1.1727
2.6453	1.2444	0.923	0.72622	0.66172		2.2011	1.4822	1.2545	1.0667	0.97621		3.9046	2.604	2.1113	1.4634	1.4331
1.8063	1.0377	0.85043	0.7464	0.72214		1.7674	1.3064	1.1842	1.0965	1.0715		2.5406	2.1249	1.8686	1.3585	0.62389
3.1344	1.482	1.0502	0.80694	0.87515		3.0942	1.8501	1.4583	1.1857	1.2854		6.4856	4.4238	3.6668	2.4106	1.2873
1.3856	0.60604	0.45643	0.3227	0.34724		1.0442	0.67946	0.59676	0.47331	0.50053		0.71147	0.38286	0.28801	0.20832	1.2482
3.0082	1.4193	1.0394	0.66568	0.74114		2.0075	1.477	1.2873	0.97759	1.0744		0.96864	0.94689	0.81697	0.6257	1.2183
3.1633	1.4948	1.077	0.66568	0.7479		2.3632	1.6205	1.3706	0.97759	1.1029		2.2597	1.3759	0.99953	0.6257	0.92432
2.6343	1.3276	1.0197	0.80694	0.75317		1.8022	1.4146	1.2927	1.1857	1.1065		2.9614	2.2297	1.7576	1.3585	1.1146
3.1918	1.4887	1.0798	0.70604	0.65963		2.119	1.5236	1.3287	1.037	0.9672		2.6778	1.7879	1.3328	0.7302	0.42694
3.7103	1.6938	1.2084	0.76658	0.65654		2.5315	1.8027	1.5309	1.1262	0.96442		2.5354	1.9858	1.5225	1.0441	0.99754
4.7615	1.8676	1.2449	0.72622	0.80062		2.7762	1.7993	1.4799	1.0667	1.182		3.6281	2.4104	1.6663	0.83476	1.4134
3.7377	1.7118	1.2215	0.78676	0.82476		2.7532	1.8634	1.5575	1.1559	1.2142		2.8457	1.8763	1.3363	0.7302	1.4802
2.0745	1.1789	0.94715	0.7464	1.0503		1.9444	1.4453	1.2963	1.0965	1.5405		1.0321	0.62918	0.52852	0.41689	1.3434
2.8868	1.4995	1.1202	0.60514	0.46506		2.1288	1.6125	1.4069	0.8885	0.67923		2.2632	1.2778	0.81741	0.31257	0.51329
3.0984	1.4917	1.1054	0.78676	0.80181		2.0157	1.5492	1.3808	1.1559	1.185		1.5017	1.1663	0.92058	0.6257	1.4295
4.014	1.7893	1.2367	0.68586	0.66215		2.7847	1.8973	1.548	1.0073	0.97017		5.8395	4.079	2.919	1.0441	1.3437
2.7918	1.2265	0.8755	0.46391	0.65148		1.8009	1.2875	1.0944	0.68078	0.95531		0.96936	0.39794	0.26948	0.20832	0.75814
2.3662	1.1685	0.87486	0.68586	0.494		1.9183	1.3371	1.1599	1.0073	0.72976		2.048	1.4746	1.2291	0.83476	1.4304
2.5654	1.2911	0.97829	0.6455	0.5283		1.993	1.4345	1.2536	0.94789	0.76739		2.5691	1.5195	1.0209	0.41689	0.98285
2.8123	1.088	0.75731	0.56479	0.58209		1.8276	1.1541	0.96473	0.82913	0.86264		2.257	1.1832	0.85141	0.6257	0.57087
1.9306	1.0721	0.83853	0.72622	0.78099		1.8725	1.3632	1.1819	1.0667	1.136		5.1425	3.6243	3.0224	1.989	0.6726
4.7236	1.7965	1.1764	0.66568	0.57138		2.764	1.7812	1.4304	0.97759	0.85124		3.5575	2.366	1.5413	0.6257	0.84665
4.1524	1.6867	1.1165	0.6455	0.78215		2.5082	1.6534	1.3434	0.94789	1.1538		5.9987	4.4979	2.9779	0.93938	0.92755
5.4263	2.207	1.3732	0.58497	0.62457		3.076	2.0563	1.5949	0.85881	0.91022		9.1812	6.8828	4.6364	1.1488	0.93155
3.2354	1.5974	1.156	0.76658	0.75904		2.2811	1.6996	1.47	1.1262	1.1086		0.83188	0.72403	0.61075	0.41689	1.2305
2.91	1.3625	1.012	0.6455	0.60136		1.8856	1.405	1.2575	0.94789	0.87787		1.5608	1.1654	0.88125	0.52126	0.85677
3.2575	1.4166	1.0148	0.7464	0.7261		2.2937	1.5362	1.3037	1.0965	1.0649		1.5212	1.0783	0.95598	0.83476	0.59183
3.1881	1.3391	0.97983	0.76658	1.1108		2.2912	1.5101	1.3035	1.1262	1.6523		3.9883	1.8611	1.2236	0.6257	1.5054
2.6566	1.3437	0.99717	0.76658	0.8324		2.5215	1.6463	1.3707	1.1262	1.2112		2.4647	1.5802	1.3094	1.0441	1.0377
2.5567	1.2654	0.96645	0.78676	0.83635		2.4551	1.6313	1.3828	1.1559	1.2306		1.9532	1.3512	1.1609	0.93938	1.1246
2.936	1.3841	1.0274	0.72622	0.7651		2.4625	1.642	1.3876	1.0667	1.1243		3.4418	2.1316	1.6561	1.1488	1.1659
1.8659	1.1548	0.95568	0.7464	0.70557		2.0131	1.5464	1.3927	1.0965	1.0357		1.8964	1.6656	1.4759	0.93938	1.9391
2.5773	1.3658	1.0512	0.72622	0.88322		2.1454	1.6004	1.4053	1.0667	1.2864		1.3045	1.0031	0.85493	0.6257	1.4866
2.5673	1.3759	1.0739	0.72622	0.8431		2.1766	1.6688	1.4687	1.0667	1.2382		1.5488	1.2986	1.1571	0.93938	1.4857
2.5103	1.2462	0.95057	0.68586	0.84814		1.9001	1.4115	1.2499	1.0073	1.2539		2.7429	1.5775	1.2149	0.93938	0.92232
2.7474	1.2872	0.93508	0.68586	0.60906		1.8716	1.3554	1.1777	1.0073	0.89174		2.8587	1.7657	1.303	0.93938	0.91554
3.328	1.4651	1.0155	0.66568	0.57959		2.2745	1.5366	1.2796	0.97759	0.85142		4.2196	2.8504	2.1459	1.1488	0.85749
2.7663	1.2684	0.92152	0.68586	0.71104		2.205	1.4719	1.234	1.0073	1.0414		3.7393	2.6452	2.1518	1.3585	1.1051
2.2914	1.1411	0.87515	0.70604	0.70841		1.9206	1.3508	1.1811	1.037	1.0381		3.1611	2.1731	1.7524	1.1488	1.0495
2.4741	1.2071	0.92527	0.76658	0.77792		2.0941	1.4621	1.2742	1.1262	1.1288		3.0004	2.1149	1.795	1.3585	1.0577
3.1431	1.4147	1.0122	0.68586	0.65412		2.1079	1.4949	1.2811	1.0073	0.95254		2.1931	1.189	0.89581	0.7302	0.66475
3.3912	1.4147	1.0119	0.66568	0.72469		2.3998	1.5929	1.3296	0.97759	1.0568		3.7359	2.0089	1.3884	0.83476	0.89925
3.842	1.7634	1.2363	0.78676	0.74113		2.571	1.8283	1.5536	1.1559	1.0833		5.008	3.3421	2.5232	1.1488	0.91369
3.3251	1.4858	1.0811	0.76658	0.85769		2.4072	1.6336	1.403	1.1262	1.2528		4.0899	2.6961	2.1269	1.2536	1.0515
1.8321	1.0342	0.82758	0.66568	0.57421		2.006	1.4204	1.2267	0.97759	0.84039		1.479	1.0791	0.93331	0.7302	0.87914
3.0708	1.4634	1.0689	0.66568	0.74247		2.5171	1.7418	1.4539	0.97759	1.0915		2.394	1.7894	1.4073	0.7302	1.2046
4.4923	1.7578	1.1452	0.68586	0.95776		2.6197	1.7012	1.3833	1.0073	1.4115		4.5863	3.2918	2.4286	0.93938	1.3529
3.3803	1.4225	1.0044	0.66568	0.68187		2.2345	1.5261	1.2895	0.97759	1.0137		3.4508	2.336	1.7272	0.93938	0.74089
3.8362	1.6389	1.1096	0.70604	0.66584		2.6846	1.7323	1.4116	1.037	0.98516		4.9388	3.4094	2.61	1.0441	1.0197
2.7208	1.317	0.9916	0.72622	0.72187		2.3082	1.574	1.3442	1.0667	1.0596		2.3185	1.4383	1.1895	1.0441	1.0865
3.0439	1.3376	0.9963	0.78676	0.6952		2.1071	1.4521	1.2826	1.1559	1.0228		2.106	1.0561	0.77359	0.6257	1.3489
2.7044	1.2939	0.98117	0.66568	0.70533		1.799	1.3831	1.256	0.97759	1.0403		1.1249	0.74822	0.57002	0.41689	0.61084
3.2718	1.4562	1.0858	0.82713	0.78522		2.7849	1.7349	1.4726	1.2154	1.1391		2.1263	1.0419	0.7613	0.6257	1.6016
3.3017	1.4727	1.0727	0.7464	0.49384		3.0122	1.896	1.5286	1.0965	0.7217		1.8074	1.2248	1.0618	0.93938	1.1126
3.269	1.4054	1.0032	0.72622	0.79103		2.7228	1.7268	1.4085	1.0667	1.1565		2.7957	1.6905	1.3545	0.93938	0.82405
5.3221	2.1067	1.3759	0.7464	0.71562		3.4574	2.1874	1.7284	1.0965	1.0347		5.4578	3.9643	2.9609	1.3585	1.173
2.7596	1.3657	1.029	0.7464	0.76018		2.087	1.5083	1.3269	1.0965	1.1231		2.1972	1.3242	1.014	0.7302	1.2654
2.8039	1.3034	0.95685	0.72622	0.70851		2.2325	1.5085	1.2753	1.0667	1.0352		3.3962	1.869	1.3839	0.93938	0.31176
3.2914	1.4485	1.0395	0.76658	0.55985		2.5093	1.6261	1.371	1.1262	0.81713		1.2755	1.1648	1.0207	0.7302	0.87139
2.7577	1.3456	1.0266	0.76658	0.71082		2.063	1.4958	1.3346	1.1262	1.0408		2.4283	1.6627	1.3909	1.1488	0.92843
3.3717	1.532	1.1366	0.86749	1.0598		2.432	1.6748	1.4562	1.2749	1.5706		1.9237	1.4477	1.1282	0.83476	1.5679
2.1574	1.1186	0.82085	0.60514	0.70758		2.5081	1.5298	1.197	0.8885	1.0219		5.7587	3.7547	3.0266	1.8838	0.63326
3.598	1.485	1.0426	0.66568	0.73772		2.5165	1.5869	1.3162	0.97759	1.0562		3.2255	2.1069	1.5256	0.83476	0.34542
4.4519	1.9094	1.2992	0.84731	0.90047		3.0956	1.9771	1.6124	1.2451	1.3278		9.6191	5.5638	3.4731	1.3585	0.71047
2.9616	1.5216	1.1584	0.80694	0.74397		2.7159	1.8589	1.5741	1.1857	1.0834		5.9675	3.7988	2.7914	1.4634	0.85594
3.0873	1.4978	1.1074	0.72622	0.91961		2.8639	1.8094	1.4891	1.0667	1.3265		5.6487	3.5483	2.7365	1.5684	0.40496
2.9329	1.4328	1.0757	0.80694	0.92196		2.3047	1.6345	1.4013	1.1857	1.3602		4.901	3.2709	2.4666	1.4634	1.9494
4.078	1.8525	1.2594	0.78676	0.92434		2.9393	1.9282	1.5625	1.1559	1.3481		1.5087	1.0253	0.84454	0.7302	1.4041
2.7194	1.34	0.98098	0.58497	0.47444		2.3589	1.6373	1.3624	0.85881	0.70033		3.0616	1.9659	1.5145	0.7302	0.73392
3.1187	1.3573	0.97584	0.72622	0.75006		2.4174	1.581	1.3093	1.0667	1.0969		3.7177	2.1082	1.5994	1.0441	1.7454
3.0225	1.3598	0.99535	0.6455	0.69201		2.4118	1.5706	1.3162	0.94789	0.98474		1.7523	1.0413	0.79262	0.52126	0.95617
3.5213	1.5696	1.1772	0.88768	0.65218		2.4397	1.6858	1.4943	1.3047	0.94694		7.5799	4.0323	2.7495	1.5684	0.91693
2.2305	1.2681	1.0121	0.76658	0.9615		2.2962	1.6627	1.4503	1.1262	1.4116		2.5279	1.7967	1.5008	0.93938	1.8812
5.1545	2.124	1.425	0.82713	0.91274		3.8066	2.3644	1.8625	1.2154	1.3216		5.8628	4.2338	3.0932	1.3585	1.6317
3.373	1.5625	1.1523	0.82713	0.90163		2.5917	1.7775	1.5224	1.2154	1.3329		3.8828	2.6487	2.0965	1.3585	1.0047
3.0585	1.5103	1.1545	0.86749	0.90432		2.3117	1.6975	1.5116	1.2749	1.3116		2.2397	1.7089	1.4031	1.0441	1.3125
3.6218	1.7212	1.2122	0.76658	0.76756		2.1065	1.6252	1.4375	1.1262	1.1315		2.2534	2.2178	1.8246	0.93938	1.2229
2.5799	1.3916	1.1117	0.82713	0.88552		2.3199	1.7445	1.5711	1.2154	1.3047		2.7824	1.8931	1.5632	0.93938	1.6651
2.4315	1.2948	1.0198	0.78676	0.65476		2.2766	1.6267	1.419	1.1559	0.94987		2.8297	1.9779	1.6247	1.1488	1.487
3.6491	1.6947	1.2554	0.92804	1.2104		2.7596	1.8694	1.6236	1.3642	1.7683		2.4734	1.8732	1.5706	1.1488	2.1547
4.7211	1.9463	1.3357	0.86749	0.87963		3.1704	2.0782	1.6947	1.2749	1.2916		2.4635	1.4878	1.1487	0.93938	1.0646
3.7227	1.7048	1.2241	0.70604	0.78698		2.4497	1.7775	1.542	1.037	1.1416		1.8528	1.2066	0.8882	0.52126	0.23567
2.5972	1.332	1.0136	0.70604	0.72732		2.1854	1.5577	1.3541	1.037	1.0637		2.4186	1.6816	1.33	0.93938	1.3579
3.1874	1.352	0.97316	0.72622	0.71351		2.3483	1.5282	1.2773	1.0667	1.0436		4.3113	2.7817	2.1857	1.5684	0.42191
2.5991	1.3755	1.074	0.84731	1.0174		2.2582	1.5977	1.4215	1.2451	1.4972		1.2434	1.0704	1.0094	0.93938	1.3036
3.3089	1.5495	1.1498	0.82713	0.79667		2.3433	1.659	1.4519	1.2154	1.1688		4.3204	2.6967	1.6745	0.83476	1.061
2.3019	1.2327	0.99867	0.84731	0.99356		2.4777	1.6634	1.4372	1.2451	1.4578		2.0809	1.3038	0.9978	0.6257	1.2298
3.2923	1.4282	1.0746	0.80694	0.64997		2.4874	1.606	1.3956	1.1857	0.95993		2.0056	1.2663	1.1113	0.93938	0.84272
4.3245	1.7767	1.2497	0.78676	0.6137		2.6549	1.7253	1.4859	1.1559	0.88839		11.474	5.5863	3.1868	1.1488	0.94789
4.365	1.9894	1.3738	0.84731	0.81386		3.1275	2.1373	1.7395	1.2451	1.1791		8.9636	6.7028	4.6209	1.4634	0.74621
1.5416	0.90758	0.70324	0.48409	0.50853		1.9247	1.3079	1.0623	0.71044	0.7446		2.4728	1.9316	1.5639	0.7302	0.7859
4.038	1.8712	1.27	0.7464	0.57741		3.3894	2.1856	1.6865	1.0965	0.84198		6.1314	4.3169	3.3236	1.6735	1.1346
3.555	1.5408	1.0492	0.62532	0.54975		2.2317	1.5346	1.2805	0.91819	0.80044		6.4124	4.7482	3.4189	1.3585	1.5939
2.8581	1.1648	0.83219	0.6455	0.64344		2.0478	1.3034	1.0974	0.94789	0.93765		5.9061	3.587	2.5579	1.5684	0.74431
4.6879	1.8705	1.1697	0.62532	0.5841		3.0601	1.9253	1.4673	0.91819	0.84954		6.1817	4.5032	3.5066	1.4634	0.6225
4.1251	1.6156	1.0325	0.58497	0.54769		2.6004	1.6277	1.2702	0.85881	0.79807		9.3026	6.0878	4.0196	1.3585	0.53151
3.7569	1.5353	0.99759	0.60514	0.45957		2.4894	1.5534	1.2291	0.8885	0.67057		6.624	3.9403	2.605	0.93938	0.71334
4.9285	1.8563	1.1472	0.56479	0.45545		2.8756	1.7836	1.3763	0.82913	0.665		6.3614	4.583	3.1991	0.83476	0.74856
2.8157	1.2681	0.9025	0.62532	0.56754		2.5494	1.594	1.2746	0.91819	0.83075		3.2014	2.0316	1.6413	1.0441	1.0997
3.4671	1.5275	1.0451	0.62532	0.68973		3.2274	1.9298	1.4784	0.91819	1.0187		6.1987	3.6946	2.8233	1.4634	0.77632
4.1034	1.9417	1.4039	0.9886	1.0869		3.3105	2.1992	1.851	1.4535	1.6067		1.7545	1.0941	0.91803	0.83476	1.4823
3.1248	1.4748	1.1135	0.84731	0.83557		2.9291	1.8276	1.5376	1.2451	1.2233		2.8257	1.4902	1.064	0.6257	1.1151
2.7649	1.3084	1.0267	0.80694	0.79168		2.1741	1.4965	1.3519	1.1857	1.1584		2.8213	1.6921	1.2674	0.83476	1.1844
3.543	1.6257	1.1773	0.7464	0.74934		2.3958	1.7037	1.4672	1.0965	1.0986		2.4109	1.1583	0.90012	0.7302	1.4807
3.4593	1.6534	1.2234	0.78676	0.7745		2.884	1.915	1.6028	1.1559	1.1348		1.9672	1.3413	1.0788	0.83476	1.4865
2.734	1.2497	0.89376	0.54461	0.49281		2.033	1.3958	1.1714	0.79945	0.71757		1.2585	0.94783	0.7861	0.52126	0.42028
2.5823	1.3658	1.1231	0.88768	0.9598		2.5923	1.8199	1.6215	1.3047	1.3983		2.0109	1.2054	1.0811	1.0441	1.9411
2.9552	1.3938	1.0534	0.78676	0.8643		2.2942	1.5872	1.39	1.1559	1.2582		2.6353	1.6844	1.3504	1.0441	0.82021
3.024	1.4736	1.1033	0.86749	0.99699		2.5861	1.7548	1.5018	1.2749	1.45		2.8203	1.8506	1.4776	1.0441	1.5455
3.1805	1.5159	1.1103	0.7464	0.68511		2.5501	1.7665	1.492	1.0965	1.0109		3.2246	2.2944	1.8052	1.0441	1.691
4.2386	1.8601	1.3015	0.78676	0.9363		3.2885	2.1666	1.7412	1.1559	1.3678		3.3541	1.6657	1.1534	0.83476	1.6694
3.0922	1.4592	1.1034	0.82713	0.84445		2.6729	1.8024	1.5416	1.2154	1.2413		2.1804	1.5921	1.4221	1.2536	1.5382
2.9273	1.4311	1.0783	0.80694	0.9618		2.0165	1.5292	1.3688	1.1857	1.3927		3.752	2.4383	1.8488	1.2536	2.0776
4.076	1.8187	1.2738	0.88768	0.84183		3.2268	2.0618	1.6657	1.3047	1.2506		5.0645	3.2601	2.3306	1.2536	1.2284
3.0724	1.5153	1.1475	0.82713	0.95491		2.4428	1.7183	1.5054	1.2154	1.4051		4.2852	2.5739	1.8528	1.1488	1.1359
3.3016	1.586	1.1662	0.80694	0.79412		2.6807	1.8686	1.5757	1.1857	1.1639		3.0073	1.969	1.5633	1.0441	1.1072
3.3774	1.6385	1.1852	0.7464	0.5301		2.2503	1.6666	1.448	1.0965	0.77548		4.0013	2.9433	1.9972	0.7302	0.37308
3.7545	1.6495	1.1932	0.84731	0.87727		2.8954	1.8595	1.5553	1.2451	1.282		3.5426	2.1682	1.6709	1.1488	0.66468
3.3356	1.624	1.2034	0.82713	0.81742		2.1638	1.6418	1.4845	1.2154	1.1768		1.3822	1.0587	0.88243	0.7302	1.3191
2.4231	1.4144	1.1399	0.88768	0.87174		2.2086	1.669	1.5125	1.3047	1.2779		1.8955	1.5167	1.3306	1.0441	1.203
3.9022	1.7763	1.2913	0.90786	0.97159		2.9705	1.9892	1.6917	1.3344	1.4379		1.181	0.65854	0.50846	0.41689	1.9331
2.728	1.4154	1.085	0.80694	0.62571		2.767	1.8307	1.5413	1.1857	0.91318		5.1247	3.2375	2.4848	1.4634	1.5051
3.0511	1.4489	1.0975	0.88768	0.85778		2.9204	1.8308	1.5328	1.3047	1.2589		4.1724	2.4734	1.8629	1.1488	0.73175
2.5909	1.3659	1.0414	0.76658	0.90813		2.1724	1.5727	1.3725	1.1262	1.3359		3.6531	2.4157	1.7759	0.93938	1.5131
3.2418	1.5981	1.2313	0.92804	0.86207		2.7955	1.894	1.6596	1.3642	1.253		2.5652	1.7906	1.4086	1.0441	1.8586
2.6441	1.3562	1.0725	0.84731	0.85299		2.309	1.6393	1.4613	1.2451	1.2465		2.6051	1.7739	1.4608	1.0441	1.5901
3.3088	1.4776	1.0754	0.80694	0.69005		2.6924	1.7341	1.4478	1.1857	1.0114		3.4134	2.3237	1.8977	1.2536	0.85636
1.6474	0.75855	0.53705	0.36304	0.33898		1.2967	0.85155	0.70034	0.53256	0.48738		3.5014	2.3966	1.7297	0.7302	0.65973
2.3493	1.1866	0.90682	0.62532	0.81016		2.3796	1.58	1.3185	0.91819	1.1954		1.6435	1.1106	0.94147	0.7302	1.5501
2.588	1.3666	1.0272	0.7464	0.74977		1.9588	1.5165	1.3287	1.0965	1.0912		2.2074	1.7612	1.5133	1.1488	1.2888
2.8341	1.4022	1.0543	0.72622	0.70833		2.18	1.6071	1.3987	1.0667	1.0321		1.5867	1.0719	0.86461	0.6257	1.4552
3.7308	1.6119	1.1526	0.78676	0.8325		2.8033	1.8214	1.5142	1.1559	1.2177		5.6998	2.7687	1.8644	1.0441	1.1598
2.6255	1.3598	1.0837	0.7464	0.61646		2.5797	1.7269	1.4991	1.0965	0.89831		1.9939	1.2195	0.9651	0.6257	0.27419
3.1295	1.3791	1.0085	0.7464	0.85565		2.1854	1.5055	1.2985	1.0965	1.2515		5.2928	3.2044	2.4713	1.8838	1.4814
4.1093	1.7897	1.2334	0.76658	0.79137		2.628	1.8423	1.5352	1.1262	1.1724		4.5383	2.9992	2.0758	1.1488	1.1106
3.7259	1.645	1.1989	0.96841	1.162		2.8719	1.8671	1.5793	1.4237	1.7145		3.1154	1.6984	1.164	0.7302	1.3732
3.1042	1.5505	1.1964	0.84731	0.81417		2.3573	1.7448	1.5582	1.2451	1.1937		0.67469	0.88183	0.99144	1.1488	1.6154
3.8773	1.7932	1.2931	0.84731	0.80797		2.6892	1.9206	1.6467	1.2451	1.1724		4.2216	2.6852	1.9157	1.1488	2.0087
3.4355	1.6926	1.28	0.76658	0.70101		2.7039	1.8799	1.6348	1.1262	1.0306		2.3065	1.1439	0.84215	0.52126	0.80475
2.4937	1.3596	1.0899	0.78676	0.76335		2.3085	1.6842	1.5001	1.1559	1.1068		2.1085	1.3284	1.0176	0.6257	1.2318
2.4695	1.3304	1.065	0.80694	0.75372		2.5659	1.7411	1.5156	1.1857	1.1274		3.6019	1.9949	1.4556	0.83476	1.6631
3.3839	1.6064	1.1889	0.96841	0.64209		2.5227	1.7826	1.5509	1.4237	0.94489		1.8196	1.3132	1.1279	0.93938	0.98275
3.5515	1.6951	1.1693	0.7464	0.82599		2.8646	1.891	1.5226	1.0965	1.2067		4.1762	2.8462	2.2648	1.2536	1.3836
4.5355	1.9972	1.3781	0.9886	0.98234		3.421	2.1881	1.7774	1.4535	1.4368		3.2918	2.2603	1.7882	1.2536	1.1875
3.9906	1.7362	1.2658	0.92804	1.1492		2.8697	1.9184	1.6458	1.3642	1.6691		2.4874	1.79	1.5485	1.3585	1.6513
3.1434	1.3964	1.0297	0.78676	0.7068		2.4404	1.6356	1.3899	1.1559	1.0434		4.6936	3.1314	2.5985	1.989	0.54097
5.0169	2.0659	1.3873	0.86749	0.92481		3.379	2.2114	1.7758	1.2749	1.358		2.4793	1.295	0.84235	0.52126	1.6067
2.1412	1.2781	0.99973	0.66568	0.743		2.3898	1.7368	1.4464	0.97759	1.0973		1.8097	1.4665	1.2647	0.93938	1.2435
3.7326	1.8142	1.341	0.88768	0.8501		2.5928	1.9002	1.6616	1.3047	1.2368		2.0031	1.3584	1.046	0.7302	1.5637
3.6839	1.7762	1.3266	0.92804	0.97747		3.235	2.1779	1.844	1.3642	1.4348		4.331	2.9719	2.4102	1.3585	1.1039
4.5445	2.051	1.402	0.78676	0.78627		3.4363	2.2302	1.7744	1.1559	1.1609		5.921	3.8732	2.3483	0.7302	0.60672
5.0155	2.2616	1.5745	0.94823	0.6144		3.1316	2.2791	1.9352	1.394	0.90318		5.2488	3.5428	2.228	1.0441	0.77811
2.7821	1.4878	1.1639	0.88768	0.97953		2.5556	1.8092	1.5821	1.3047	1.4345		1.7437	1.1752	0.97069	0.7302	1.3972
3.5945	1.7076	1.286	0.94823	0.97383		2.8655	1.9473	1.6921	1.394	1.4457		3.2488	1.8773	1.505	1.2536	1.2752
2.8666	1.3448	0.98284	0.6455	0.62523		2.1904	1.5216	1.2874	0.94789	0.92145		2.3632	1.6367	1.3562	1.0441	0.60813
4.5009	1.937	1.38	0.94823	1.0093		3.2214	2.1195	1.7805	1.394	1.4729		2.7205	1.837	1.4618	1.0441	1.5447
3.4167	1.6885	1.26	0.92804	0.87905		2.5613	1.8358	1.6166	1.3642	1.2757		2.0684	1.7314	1.5929	1.4634	1.2517
3.7954	1.7924	1.347	1.0492	0.93881		2.5983	1.9023	1.6925	1.5429	1.3827		4.1375	2.4093	1.8636	1.5684	1.199
3.4954	1.7644	1.3509	0.86749	0.70707		3.0519	2.0892	1.7975	1.2749	1.0357		3.2795	2.0964	1.6423	1.1488	1.496
3.0312	1.5875	1.2553	0.96841	0.98641		2.8907	2.0463	1.792	1.4237	1.4573		5.7632	3.4145	2.6704	1.6735	1.7374
5.8742	2.4955	1.6766	1.0895	0.99703		3.8449	2.6057	2.1161	1.6025	1.4551		1.6602	1.1674	1.0246	0.93938	1.5136
4.125	1.8849	1.3334	0.86749	0.795		2.4166	1.8419	1.6148	1.2749	1.1685		2.7864	1.8889	1.3766	0.93938	1.6385
3.1154	1.4445	1.0491	0.78676	0.83453		2.7146	1.7656	1.4524	1.1559	1.2121		4.9527	3.1764	2.4667	1.4634	1.3242
4.2393	1.898	1.3644	0.96841	0.87289		3.0289	2.035	1.7343	1.4237	1.2684		4.7075	3.0978	2.3144	1.4634	1.29
5.2072	2.258	1.5447	0.94823	0.97651		3.5251	2.2915	1.9035	1.394	1.4269		4.7614	2.9983	1.955	0.83476	1.325
4.1313	1.8652	1.3732	1.0088	1.1047		3.3431	2.1488	1.809	1.4833	1.6117		3.7823	2.5596	1.877	1.1488	0.91016
2.7092	1.4908	1.1806	0.92804	0.95373		2.6609	1.9561	1.7099	1.3642	1.3906		2.8036	2.1487	1.8312	1.1488	1.3341
5.2998	2.2612	1.5474	0.84731	0.93059		3.3146	2.2994	1.8917	1.2451	1.3586		6.6408	4.8496	3.2085	1.1488	1.8897
5.0256	2.2126	1.5168	0.92804	0.94365		3.3993	2.2892	1.8815	1.3642	1.3863		7.1057	5.1781	3.7078	1.6735	1.3481
4.6679	2.099	1.5477	1.1501	1.0648		3.2097	2.2783	2.0011	1.692	1.5706		2.7433	1.8871	1.5552	1.2536	1.6942
3.9981	1.9429	1.4331	1.0088	0.98922		3.136	2.2237	1.8938	1.4833	1.4561		3.4964	2.3346	1.9816	1.6735	1.2938
3.9917	1.986	1.5149	1.0693	1.1427		2.7914	2.0885	1.8848	1.5727	1.6645		3.3807	2.1823	1.819	1.5684	1.6123
1.4729	0.6012	0.41744	0.24201	0.25323		1.396	1.0704	0.91783	0.54124	0.55938		2.5497	0.75381	0.29409	0.099445	0.15216
1.858	0.71314	0.47776	0.28235	0.32383		1.8281	1.2969	1.0707	0.63167	0.70769		2.1923	0.86235	0.42499	0.19897	1.0004
1.702	0.63792	0.42126	0.20167	0.16404		1.6732	1.1663	0.9416	0.45087	0.3598		0	0	0	0	0.11665
1.5058	0.55464	0.36155	0.1815	0.13966		1.4044	1.0137	0.816	0.40571	0.30641		0	0	0	0	0.54468
1.5378	0.59603	0.38957	0.16133	0.16391		1.3602	1.0448	0.85582	0.36057	0.35847		0	0	0	0	0
1.7682	0.64693	0.42321	0.20167	0.1975		1.5887	1.1532	0.93864	0.45087	0.43703		0	0	0	0	0.59942
1.3874	0.51441	0.33675	0.14117	0.079978		1.548	1.0045	0.77283	0.31544	0.17629		0	0	0	0	0.2489
1.618	0.52682	0.34098	0.20167	0.30584		1.6182	0.99223	0.77667	0.45087	0.67855		0.23323	0.1443	0.12284	0.099445	1.2067
1.8704	0.60181	0.37748	0.1815	0.1814		2.0536	1.1581	0.86126	0.40571	0.39047		0	0	0	0	0.23537
1.1604	0.45	0.31752	0.20167	0.28631		1.3366	0.92298	0.74965	0.45087	0.62941		2.3827	0.61674	0.31468	0.19897	0.72154
0.91186	0.41428	0.30056	0.22184	0.28342		1.0425	0.77433	0.66788	0.49605	0.62491		0.90849	0.71054	0.60401	0.39825	0.67685
1.2385	0.48218	0.35157	0.22184	0.10538		1.2363	0.87875	0.77482	0.49605	0.22894		1.6126	0.64661	0.39198	0.19897	0.1124
1.1777	0.4563	0.32141	0.24201	0.30966		1.3281	0.85802	0.71948	0.54124	0.68325		1.2359	0.56462	0.46416	0.39825	0.67229
1.4667	0.57233	0.39217	0.24201	0.22312		1.7428	1.171	0.91808	0.54124	0.49814		0.41065	0.23278	0.16455	0.099445	0.78347
2.7353	0.87852	0.54412	0.26218	0.28763		2.5432	1.5834	1.2166	0.58645	0.63479		0	0	0	0	0.92391
2.0244	0.70558	0.48177	0.26218	0.25236		2.1092	1.4136	1.1409	0.58645	0.55998		0	0	0	0	0.48242
1.7751	0.69717	0.47365	0.22184	0.17722		1.6812	1.2272	1.0333	0.49605	0.38924		0	0	0	0	0.13614
1.8663	0.80397	0.55881	0.30252	0.35701		1.9455	1.4646	1.2399	0.67691	0.78685		0	0	0	0	0.46891
2.1485	0.7629	0.52413	0.3227	0.26676		2.1348	1.418	1.1724	0.72217	0.58976		2.1021	0.63405	0.30775	0.099445	0.24254
1.4036	0.61619	0.45137	0.3227	0.32576		1.5596	1.1549	1.0107	0.72217	0.72073		2.5953	1.3528	0.88797	0.49802	1.278
1.3931	0.51382	0.35793	0.22184	0.22186		1.4019	0.96387	0.81308	0.49605	0.49748		0	0	0	0	0.65636
1.584	0.5405	0.34117	0.22184	0.18337		1.6465	0.99572	0.75881	0.49605	0.41179		0	0	0	0	0.039774
2.6055	0.91794	0.58755	0.30252	0.39191		2.4084	1.6224	1.2891	0.67691	0.87306		2.2626	0.57037	0.24284	0.099445	0.96303
0.97252	0.38477	0.26705	0.16133	0.16654		1.0665	0.73327	0.60603	0.36057	0.37265		1.5153	0.61415	0.30437	0.099445	0.4714
1.2154	0.42125	0.28267	0.16133	0.18122		1.0382	0.73269	0.62238	0.36057	0.39774		0	0	0	0	0.39241
1.2701	0.44257	0.29482	0.1815	0.15978		1.2881	0.80897	0.65814	0.40571	0.34843		0	0	0	0	0.52276
1.4788	0.50699	0.32895	0.1815	0.15953		1.4473	0.92653	0.73412	0.40571	0.35424		0	0	0	0	0.58805
0.81539	0.29943	0.20138	0.14117	0.09954		0.81986	0.55931	0.45376	0.31544	0.21802		2.2129	0.58349	0.26105	0.099445	0.27431
0.9816	0.27684	0.17043	0.14117	0.15477		1.0242	0.51984	0.3828	0.31544	0.34012		0.098029	0.12399	0.11338	0.099445	0.77564
1.906	0.72183	0.497	0.3227	0.36654		2.0099	1.3567	1.1252	0.72217	0.7995		0	0	0	0	1.5284
1.674	0.61325	0.41688	0.30252	0.3187		1.7423	1.1301	0.92823	0.67691	0.70035		3.0239	1.6247	1.0858	0.69778	0.93148
1.3891	0.59278	0.41441	0.24201	0.23006		1.4334	1.0702	0.9113	0.54124	0.50139		0.54716	0.22882	0.14227	0.099445	0.58446
1.0822	0.44275	0.32352	0.28235	0.32831		1.2512	0.78674	0.68516	0.63167	0.73506		1.3656	0.6954	0.5082	0.29857	0.14991
1.0818	0.52695	0.39771	0.3227	0.16207		1.2093	0.93937	0.86104	0.72217	0.35125		0.35378	0.29117	0.33802	0.49802	0.27314
2.3409	0.94217	0.60389	0.38321	0.32609		2.3099	1.5243	1.2275	0.85804	0.71409		4.0528	2.6014	1.9699	0.99801	0.31089
2.2094	0.82959	0.57747	0.36304	0.48023		2.2443	1.5925	1.33	0.81274	1.0629		5.4957	2.0518	0.89551	0.29857	0.35804
1.8015	0.79864	0.56018	0.36304	0.37786		1.9155	1.445	1.2196	0.81274	0.83242		3.4253	2.2402	1.5665	0.59786	0.86549
2.1835	0.83791	0.56215	0.38321	0.40467		2.1913	1.5441	1.2619	0.85804	0.88855		5.0718	2.6695	1.492	0.59786	1.0927
1.7391	0.67542	0.46064	0.22184	0.14355		1.8668	1.3221	1.075	0.49605	0.3149		0	0	0	0	0.35825
1.3787	0.56695	0.39809	0.30252	0.2746		1.6224	1.0132	0.85178	0.67691	0.59916		2.2442	1.3695	1.0546	0.59786	0.56228
1.5048	0.57142	0.38984	0.30252	0.35307		1.5179	0.99863	0.83365	0.67691	0.78344		2.6822	1.6176	1.191	0.69778	0.99844
0.99662	0.50703	0.38109	0.3227	0.27076		1.2355	0.88802	0.79163	0.72217	0.59612		1.321	1.0357	0.94509	0.79778	0.4243
2.4009	0.83501	0.53612	0.34287	0.1779		2.8269	1.6512	1.2432	0.76745	0.38816		5.6593	2.911	1.6601	0.59786	0.00075575
1.04	0.47266	0.35593	0.28235	0.24227		1.2397	0.87941	0.78192	0.63167	0.53191		1.342	0.95414	0.84434	0.69778	0.51179
1.3432	0.56	0.38267	0.3227	0.34966		1.6304	1.0173	0.8226	0.72217	0.75778		1.4823	1.0077	0.83904	0.59786	0.59681
1.0841	0.48551	0.34955	0.30252	0.25529		1.2627	0.86862	0.7471	0.67691	0.56165		1.5148	1.0399	0.82112	0.49802	0.43072
1.0548	0.49869	0.35806	0.30252	0.28975		1.1762	0.8784	0.76569	0.67691	0.64627		1.3049	0.99187	0.87939	0.79778	0.69909
0.82327	0.41952	0.3162	0.26218	0.32692		1.0157	0.78267	0.69434	0.58645	0.71783		1.6833	1.2982	1.1114	0.79778	0.38348
2.5131	1.1929	0.74124	0.34287	0.41864		3.0508	1.9679	1.474	0.76745	0.93158		4.3988	3.052	2.4928	1.1986	0.55764
0.94824	0.53572	0.41169	0.28235	0.22243		1.2653	0.94511	0.84076	0.63167	0.4921		1.4683	1.1003	1.0129	0.79778	0.44957
1.1831	0.55684	0.41795	0.34287	0.39179		1.3339	0.98454	0.8861	0.76745	0.86381		1.6315	1.1924	1.037	0.79778	0.73684
1.1266	0.56921	0.43802	0.36304	0.42332		1.5373	1.0787	0.95265	0.81274	0.93799		2.0443	1.3752	1.174	0.89785	0.87058
1.946	0.72574	0.51359	0.44374	0.57832		2.5425	1.4004	1.1481	0.99406	1.2873		5.2838	2.544	1.7224	0.99801	0.79166
1.5195	0.67904	0.47805	0.3227	0.32535		1.7141	1.1944	1.0101	0.72217	0.72282		2.2542	1.5473	1.2618	0.79778	0.48977
1.7946	0.72268	0.52405	0.42356	0.45625		2.2815	1.3166	1.1189	0.9487	0.99006		2.3612	1.331	1.1365	0.99801	1.0458
1.2206	0.63542	0.46885	0.38321	0.56112		1.4675	1.111	0.98547	0.85804	1.2306		1.8642	1.3388	1.1615	0.89785	1.3632
1.5139	0.76683	0.55206	0.40339	0.46205		1.9425	1.3867	1.166	0.90337	1.0258		2.2857	1.7912	1.5634	1.0982	1.0736
1.4515	0.73051	0.51758	0.34287	0.31242		1.9337	1.3421	1.101	0.76745	0.69384		2.6385	1.8354	1.5482	0.99801	0.044506
1.6394	0.75871	0.52189	0.38321	0.38903		2.0049	1.3147	1.0744	0.85804	0.86615		2.6218	1.7263	1.4274	0.99801	0.61462
1.2795	0.59745	0.42787	0.3227	0.34684		1.7461	1.1541	0.95011	0.72217	0.75538		2.5336	1.6125	1.2638	0.79778	0.67502
1.3979	0.70236	0.53566	0.42356	0.38068		1.716	1.2837	1.1593	0.9487	0.84732		1.6678	1.0027	0.78082	0.49802	0.61909
1.6515	0.77413	0.57395	0.42356	0.53362		1.9412	1.4354	1.2607	0.9487	1.1815		1.6626	1.1416	0.95373	0.69778	1.0556
1.5849	0.7575	0.54937	0.40339	0.37307		1.7679	1.335	1.1764	0.90337	0.825		1.7707	1.1305	0.86751	0.59786	1.2145
1.4856	0.74031	0.54326	0.38321	0.44257		1.8009	1.3019	1.1359	0.85804	0.9673		1.8066	1.348	1.1811	0.79778	1.1692
1.3419	0.74249	0.55462	0.36304	0.27864		1.7762	1.3482	1.1676	0.81274	0.61658		2.1701	1.6743	1.4576	0.89785	0.42302
1.8328	0.78367	0.56771	0.46391	0.43545		2.3953	1.4944	1.2487	1.0394	0.97049		2.6189	1.6809	1.3636	0.99801	1.0634
1.3702	0.69458	0.51345	0.36304	0.42892		1.7196	1.2556	1.1015	0.81274	0.95446		1.7072	1.2455	1.0435	0.69778	1.6204
1.3001	0.66628	0.51041	0.38321	0.18186		1.6209	1.2223	1.0968	0.85804	0.4001		1.6991	1.3231	1.1821	0.89785	0.38039
1.7551	0.90721	0.63347	0.38321	0.37145		2.2621	1.5913	1.3046	0.85804	0.83319		3.0376	2.222	1.9003	1.0982	0.50934
1.424	0.73339	0.55501	0.42356	0.45314		1.7976	1.3304	1.1868	0.9487	0.98084		2.5819	1.7659	1.4673	0.99801	0.80202
1.3532	0.69578	0.52429	0.36304	0.3432		1.7447	1.2622	1.1121	0.81274	0.75033		1.4947	1.0906	0.94935	0.69778	0.54621
1.439	0.7102	0.54072	0.44374	0.37594		1.917	1.312	1.1593	0.99406	0.84197		2.0796	1.4339	1.2185	0.89785	0.47084
1.3748	0.67644	0.49517	0.36304	0.41916		1.6282	1.1919	1.0401	0.81274	0.92459		1.5267	1.1344	0.97583	0.69778	0.10746
1.3776	0.75657	0.59663	0.44374	0.37441		1.8981	1.4174	1.2722	0.99406	0.82066		2.0549	1.5995	1.478	1.1986	0.51645
1.7282	0.88814	0.64951	0.48409	0.55706		2.3167	1.6256	1.3751	1.0848	1.2383		2.8159	2.0815	1.8073	1.299	1.2628
2.0061	0.92897	0.68695	0.52444	0.57207		2.3328	1.6869	1.4922	1.1756	1.2704		2.147	1.5203	1.2841	0.89785	1.1924
1.2761	0.62157	0.46427	0.36304	0.4733		1.5498	1.1447	1.0107	0.81274	1.0448		2.3449	1.6853	1.4353	0.99801	1.6423
1.4815	0.70288	0.51276	0.40339	0.45945		1.8169	1.2431	1.0713	0.90337	1.0028		2.0267	1.5524	1.3923	1.0982	1.3947
1.3433	0.67581	0.49877	0.40339	0.32199		1.5244	1.1653	1.0353	0.90337	0.7112		2.2807	1.648	1.4369	1.0982	0.75634
1.2152	0.57095	0.41015	0.28235	0.2439		1.3295	1.0018	0.87693	0.63167	0.53308		1.5878	1.1097	0.88926	0.59786	0.51191
1.0362	0.56756	0.44565	0.40339	0.38374		1.3532	1.0371	0.94542	0.90337	0.85814		1.2754	1.1164	1.0978	1.0982	1.9577
1.6905	0.85089	0.64616	0.50426	0.44729		2.2274	1.5856	1.4038	1.1302	0.98845		1.6186	1.1574	1.0028	0.79778	0.95701
1.5722	0.8375	0.62676	0.48409	0.43051		2.0449	1.5011	1.3139	1.0848	0.95129		2.0631	1.4756	1.2992	1.0982	0.3129
1.7498	0.81617	0.59482	0.40339	0.44151		2.333	1.5159	1.2835	0.90337	0.99525		2.3459	1.4878	1.2464	0.89785	0.81906
1.5633	0.82038	0.62068	0.48409	0.4948		2.0664	1.5224	1.3448	1.0848	1.1026		1.8062	1.4181	1.2578	0.99801	1.0557
1.4288	0.82396	0.64576	0.46391	0.44269		1.9678	1.5138	1.3691	1.0394	0.974		2.0623	1.5382	1.3335	0.89785	1.3011
1.4794	0.81245	0.61948	0.44374	0.35004		1.9466	1.4709	1.2995	0.99406	0.76341		2.2053	1.6358	1.4646	1.0982	0.32883
1.509	0.79959	0.62134	0.48409	0.58558		1.7434	1.4297	1.3306	1.0848	1.2841		2.1466	1.5543	1.357	1.0982	1.509
1.536	0.8551	0.65581	0.52444	0.69525		2.0035	1.5373	1.3785	1.1756	1.5228		2.0839	1.5948	1.3927	0.99801	1.2946
2.0017	0.92402	0.63862	0.46391	0.50759		2.4602	1.6437	1.3407	1.0394	1.1148		2.6019	1.8479	1.5402	0.99801	1.8131
1.7465	0.9004	0.63049	0.42356	0.35204		2.3634	1.6226	1.3254	0.9487	0.77685		3.0856	2.1741	1.7864	0.99801	0.22723
1.7538	0.80619	0.56645	0.40339	0.42881		2.129	1.463	1.224	0.90337	0.95846		3.0688	1.9779	1.5661	0.99801	0.84454
1.8279	0.83035	0.57502	0.42356	0.50536		2.2081	1.489	1.2299	0.9487	1.1171		2.8994	2.0202	1.6262	0.99801	1.7256
1.7945	0.86438	0.63075	0.46391	0.4899		2.207	1.5395	1.3288	1.0394	1.0782		2.633	1.7509	1.4661	0.99801	1.2107
1.6048	0.8136	0.6113	0.52444	0.4729		2.1504	1.5891	1.3847	1.1756	1.0402		2.3408	1.8858	1.6424	1.299	0.39467
1.7548	0.8239	0.59933	0.48409	0.37703		2.2408	1.517	1.3023	1.0848	0.82021		2.0933	1.5754	1.3842	1.0982	0.57569
1.5282	0.69183	0.50858	0.42356	0.28031		1.8773	1.2756	1.1026	0.9487	0.6186		1.779	1.1279	0.92854	0.69778	0.67514
1.564	0.78491	0.58338	0.44374	0.40828		2.0669	1.4729	1.2597	0.99406	0.88757		2.2575	1.6141	1.3961	0.99801	0.3614
1.6143	0.82892	0.61988	0.46391	0.42078		2.1494	1.4922	1.2899	1.0394	0.92822		2.1813	1.4865	1.2825	0.99801	0.83074
1.2345	0.75489	0.58275	0.40339	0.48563		1.799	1.3666	1.1972	0.90337	1.0859		1.9933	1.5619	1.4161	1.0982	0.96741
1.6662	0.7486	0.51837	0.38321	0.29966		2.0023	1.3088	1.0845	0.85804	0.66056		2.9378	1.9487	1.6083	1.0982	0.89372
1.4898	0.76124	0.54787	0.38321	0.31662		1.9904	1.4178	1.1785	0.85804	0.6954		2.894	2.094	1.7818	1.1986	0.81902
1.5239	0.77612	0.58815	0.46391	0.55725		2.1576	1.4626	1.2642	1.0394	1.2287		2.9336	1.9194	1.6476	1.299	0.6047
1.8513	0.84426	0.58963	0.44374	0.2923		2.3254	1.5009	1.2398	0.99406	0.64459		2.3835	1.4997	1.226	0.79778	0.26319
1.5204	0.70258	0.5291	0.40339	0.39958		1.9537	1.3342	1.1621	0.90337	0.88547		1.7669	1.0918	0.90478	0.69778	0.35431
1.9843	0.78306	0.52888	0.40339	0.61897		2.1257	1.375	1.128	0.90337	1.3831		2.0742	1.291	1.0226	0.69778	1.7872
1.5236	0.73545	0.54367	0.44374	0.42195		1.7867	1.2604	1.1213	0.99406	0.93582		1.62	1.1659	1.0492	0.89785	1.1745
2.1697	0.94871	0.6467	0.42356	0.50264		2.554	1.7728	1.4439	0.9487	1.1176		3.8276	2.8166	2.0243	0.79778	0.53223
1.4403	0.65273	0.44724	0.34287	0.27808		1.6286	1.1353	0.94742	0.76745	0.61136		2.0362	1.5723	1.3905	1.0982	0.19336
1.9037	0.77388	0.53992	0.44374	0.43258		1.9201	1.2908	1.1105	0.99406	0.94625		2.7552	1.8685	1.632	1.3994	1.2075
1.2756	0.63395	0.48141	0.38321	0.45139		1.5983	1.1223	0.99881	0.85804	1.0025		1.7246	1.1884	1.0569	0.89785	1.3114
1.6909	0.72636	0.52214	0.44374	0.38803		1.9254	1.2929	1.1198	0.99406	0.85915		2.4626	1.6792	1.4464	1.0982	0.57533
1.2135	0.64441	0.50438	0.46391	0.6107		1.5498	1.1807	1.0813	1.0394	1.3606		1.8936	1.4588	1.3386	1.1986	0.98074
1.5338	0.72901	0.54424	0.42356	0.30289		1.7115	1.2768	1.1537	0.9487	0.67335		1.943	1.4725	1.331	1.0982	0.49366
1.4119	0.67166	0.49331	0.40339	0.42483		1.6655	1.2097	1.0636	0.90337	0.94304		1.7489	1.2449	1.0582	0.79778	1.4877
1.6551	0.79169	0.56821	0.50426	0.52922		2.0715	1.3902	1.1853	1.1302	1.1789		2.2577	1.6556	1.5024	1.299	1.5609
1.4485	0.68738	0.53284	0.52444	0.66741		1.9669	1.3182	1.1702	1.1756	1.4635		2.0364	1.4963	1.4012	1.299	2.0838
2.1583	0.8901	0.60662	0.46391	0.54677		2.3133	1.5639	1.302	1.0394	1.2086		3.892	2.5216	1.9596	1.0982	1.6495
1.9265	0.96325	0.71804	0.56479	0.5371		2.3186	1.7039	1.5144	1.2665	1.1938		3.1774	2.1738	1.8558	1.3994	0.66117
2.0799	0.86066	0.59081	0.42356	0.40635		2.2843	1.5005	1.2462	0.9487	0.89406		3.594	2.1679	1.7213	1.1986	1.5051
1.8716	0.85927	0.60537	0.46391	0.4917		2.1663	1.4753	1.2596	1.0394	1.0913		2.612	1.7872	1.5426	1.1986	1.1325
1.9273	0.79168	0.57921	0.48409	0.43361		2.1361	1.4194	1.2465	1.0848	0.95383		2.0126	1.3269	1.1487	0.99801	0.77576
1.9496	0.89785	0.6539	0.48409	0.42177		2.3458	1.6031	1.3974	1.0848	0.93296		3.1039	1.923	1.581	1.0982	1.1169
2.1718	0.91919	0.6743	0.48409	0.5287		3.0055	1.9018	1.5694	1.0848	1.176		1.4559	0.9982	0.82577	0.69778	0.78453
1.667	0.88275	0.65853	0.52444	0.57262		2.1136	1.5713	1.3738	1.1756	1.2628		3.0571	2.298	2.0907	1.8022	1.5089
1.4405	0.73724	0.54953	0.46391	0.56658		1.799	1.3455	1.1785	1.0394	1.2462		2.3783	1.8146	1.6433	1.3994	0.95755
1.7565	0.84159	0.60996	0.48409	0.49257		2.1815	1.4961	1.2803	1.0848	1.0802		2.0626	1.5312	1.344	0.99801	1.4326
2.0065	0.87473	0.61695	0.50426	0.55836		2.3848	1.5366	1.2902	1.1302	1.2523		2.9954	1.913	1.6632	1.3994	1.4227
1.847	0.88571	0.61664	0.44374	0.39204		2.0013	1.4522	1.2379	0.99406	0.8718		2.5748	1.8284	1.5972	1.1986	0.54859
1.7736	0.79955	0.56367	0.36304	0.2787		1.9788	1.4565	1.236	0.81274	0.6075		3.8129	2.5424	1.8912	0.89785	0.22957
1.7508	0.84434	0.6162	0.48409	0.52517		1.9245	1.4618	1.2946	1.0848	1.1614		2.4518	1.6856	1.3844	0.89785	1.5349
2.2285	0.85239	0.59617	0.54461	0.46909		2.3493	1.5359	1.3009	1.2211	1.0309		4.1848	2.549	2.0954	1.6006	1.3022
1.4739	0.65777	0.49655	0.40339	0.41577		1.6703	1.1878	1.0807	0.90337	0.93128		2.0343	1.2094	0.93727	0.59786	0.7928
1.7654	0.7132	0.51507	0.38321	0.43818		1.9216	1.2654	1.0898	0.85804	0.97357		1.9448	1.0945	0.84996	0.59786	0.64465
1.2982	0.59315	0.4484	0.36304	0.49818		1.6268	1.0837	0.96031	0.81274	1.1056		1.8345	1.1009	0.93756	0.79778	1.7543
1.315	0.66434	0.49891	0.44374	0.49589		1.6941	1.1826	1.048	0.99406	1.1068		1.8922	1.3801	1.2811	1.299	1.0357
1.366	0.65256	0.521	0.52444	0.54236		1.765	1.2269	1.1377	1.1756	1.1936		2.19	1.3536	1.2347	1.3994	1.4326
1.4738	0.64724	0.46674	0.30252	0.25188		1.6767	1.1724	1.0078	0.67691	0.56566		1.2089	0.73146	0.57714	0.39825	0.92352
1.333	0.59406	0.4243	0.34287	0.40399		1.5816	1.03	0.88013	0.76745	0.87879		1.7584	1.0659	0.91493	0.79778	0.11146
2.1926	0.87456	0.62867	0.48409	0.54019		2.4782	1.5749	1.3459	1.0848	1.1953		1.7297	1.209	1.0844	0.99801	1.3578
1.0864	0.53416	0.41561	0.36304	0.42615		1.4739	0.94893	0.85506	0.81274	0.94816		0.84209	0.54334	0.46015	0.29857	0.83975
1.5839	0.67716	0.49946	0.40339	0.37171		1.5685	1.205	1.0845	0.90337	0.82773		3.5099	2.0282	1.4039	0.79778	0.81884
1.4011	0.65695	0.48754	0.34287	0.38696		1.9147	1.2655	1.0719	0.76745	0.84694		1.4793	0.99068	0.82232	0.59786	1.0135
2.4573	0.96599	0.64342	0.48409	0.48698		2.961	1.7471	1.386	1.0848	1.0729		4.9558	2.8426	2.108	1.1986	1.1434
1.8181	0.76891	0.5291	0.40339	0.32323		1.9531	1.3176	1.1105	0.90337	0.71302		3.0763	2.1155	1.7222	1.1986	0.95194
2.0707	0.94883	0.71481	0.60514	0.62698		2.5925	1.7429	1.5427	1.3575	1.3884		2.5632	1.8464	1.6951	1.6006	1.3568
2.1052	0.95137	0.67224	0.54461	0.41044		2.3449	1.6464	1.4063	1.2211	0.91095		2.9439	2.1958	1.9043	1.3994	0.76236
1.9171	0.92664	0.67584	0.52444	0.68539		2.4366	1.7065	1.4518	1.1756	1.5041		2.7649	2.0424	1.8026	1.299	1.706
1.6383	0.85202	0.66278	0.60514	0.61768		2.1183	1.6132	1.4734	1.3575	1.3703		1.9875	1.6485	1.4788	1.1986	2.0366
1.7322	0.88847	0.67596	0.50426	0.41109		2.1516	1.6397	1.4693	1.1302	0.89749		2.3308	1.6061	1.2835	0.79778	1.1075
1.9048	0.95381	0.7198	0.52444	0.53696		2.2422	1.684	1.5133	1.1756	1.1925		1.987	1.5452	1.3572	0.99801	1.276
2.153	1.0148	0.7393	0.60514	0.65244		2.6023	1.8351	1.5821	1.3575	1.4279		3.2723	2.3594	2.0676	1.5	1.4627
1.6464	0.93121	0.71175	0.56479	0.61969		2.1334	1.6717	1.4918	1.2665	1.36		2.5863	2.1008	1.8766	1.3994	1.1513
2.238	1.0912	0.80127	0.58497	0.71471		2.9645	2.0698	1.7466	1.312	1.5654		3.908	2.7068	2.2839	1.6006	2.0256
2.5423	1.1823	0.8179	0.56479	0.68037		3.3931	2.1932	1.7521	1.2665	1.5068		3.9948	2.6877	2.1569	1.1986	1.4314
1.7688	0.96441	0.71539	0.52444	0.48444		2.3146	1.727	1.4982	1.1756	1.0744		2.9591	2.2685	2.0345	1.6006	1.5151
2.4686	1.2723	0.92173	0.62532	0.62779		3.3931	2.3495	1.9573	1.403	1.398		4.6413	3.2503	2.7854	1.8022	1.0365
1.9155	0.97854	0.71886	0.56479	0.57018		2.3278	1.7475	1.5221	1.2665	1.2731		3.2345	2.5359	2.2772	1.8022	1.0991
2.6626	1.2035	0.82964	0.6455	0.72598		3.3318	2.1338	1.7472	1.4485	1.6334		4.076	2.7675	2.299	1.6006	1.6741
1.8261	0.95601	0.6881	0.50426	0.45774		2.3334	1.6513	1.4013	1.1302	1.0143		2.9617	2.1663	1.8965	1.3994	1.1442
1.4972	0.87362	0.6973	0.60514	0.56187		2.1095	1.6127	1.4783	1.3575	1.2477		1.5789	1.3005	1.2375	1.1986	1.4098
2.1019	0.93479	0.67129	0.52444	0.51552		2.1253	1.5456	1.3789	1.1756	1.1446		1.687	1.3286	1.244	1.0982	0.64208
1.9379	0.94332	0.73031	0.60514	0.5926		2.3744	1.7288	1.5767	1.3575	1.3189		2.1088	1.3823	1.1735	0.89785	1.3211
2.1105	0.8855	0.66137	0.58497	0.71898		2.6002	1.6574	1.4417	1.312	1.5848		2.3415	1.4953	1.3108	1.1986	1.5575
2.0277	0.92722	0.65759	0.50426	0.42082		2.1134	1.5636	1.3673	1.1302	0.93378		2.7061	1.8241	1.5386	1.1986	0.98673
2.3663	0.99836	0.68423	0.52444	0.49624		2.8246	1.8021	1.4818	1.1756	1.1016		3.8762	2.3321	1.8429	1.1986	1.8913
1.6017	0.8342	0.64122	0.52444	0.50264		1.9272	1.4201	1.3087	1.1756	1.1121		1.7991	1.2277	1.0889	0.99801	1.0333
2.2981	0.99013	0.71381	0.60514	0.62505		2.3821	1.7081	1.5137	1.3575	1.3678		3.5736	2.363	1.9863	1.5	0.9987
2.3182	0.93936	0.66176	0.52444	0.61162		2.6886	1.7538	1.4683	1.1756	1.3657		4.5732	2.7816	2.074	1.1986	1.2445
2.1384	0.92129	0.67035	0.50426	0.45738		2.4495	1.7034	1.4698	1.1302	1.026		1.7793	1.2373	1.1156	0.99801	1.5149
2.1516	1.0504	0.75564	0.56479	0.69994		2.7374	1.945	1.643	1.2665	1.5348		4.0775	3.065	2.6592	1.903	1.8219
2.2428	1.0125	0.70651	0.58497	0.49149		2.3423	1.6532	1.4348	1.312	1.0778		3.6773	2.4899	2.1607	1.8022	0.82736
1.9371	0.88543	0.6247	0.44374	0.33647		2.3049	1.6018	1.3434	0.99406	0.74511		2.7663	1.8277	1.498	0.99801	0.95395
1.6048	0.85281	0.66468	0.50426	0.56402		2.0107	1.6318	1.4939	1.1302	1.2388		2.0766	1.4381	1.2174	0.89785	1.4713
2.2937	0.97306	0.68274	0.52444	0.72715		2.5401	1.764	1.4924	1.1756	1.6129		2.355	1.6065	1.3686	1.0982	1.5733
2.0889	1.0337	0.73594	0.50426	0.56931		2.7099	1.8394	1.5286	1.1302	1.2545		3.4835	2.2877	1.9326	1.3994	1.5575
1.8344	0.83202	0.60882	0.50426	0.5072		2.3141	1.5498	1.3305	1.1302	1.1178		2.9178	1.922	1.6305	1.3994	1.1726
1.868	0.96377	0.72918	0.56479	0.73787		2.5171	1.7615	1.5378	1.2665	1.6389		2.9066	2.0617	1.8088	1.3994	1.3477
2.2172	1.1248	0.81838	0.54461	0.6254		3.1068	2.0353	1.6955	1.2211	1.3859		3.7426	2.4334	2.0723	1.3994	1.9602
2.0205	0.98015	0.71731	0.58497	0.44663		2.6662	1.8009	1.5355	1.312	0.99052		3.1707	2.1581	1.8386	1.299	0.89332
2.188	1.1063	0.81073	0.62532	0.63548		2.7066	1.9341	1.6661	1.403	1.403		3.5638	2.5402	2.2163	1.7014	1.5717
1.7235	0.85812	0.65263	0.52444	0.53125		2.1233	1.5465	1.3878	1.1756	1.1663		2.0792	1.5639	1.3884	1.0982	1.0819
2.2831	1.0033	0.73217	0.62532	0.6601		2.8411	1.8278	1.5787	1.403	1.4562		3.2593	1.991	1.6464	1.299	1.677
1.937	0.99011	0.74714	0.56479	0.56179		2.5962	1.8421	1.6002	1.2665	1.2545		3.4689	2.4261	2.0963	1.6006	3.0329
1.8952	0.9926	0.74782	0.58497	0.48312		2.363	1.7579	1.5631	1.312	1.0584		2.5293	1.978	1.7937	1.3994	0.70554
2.4174	1.21	0.86353	0.58497	0.50648		3.0008	2.0799	1.7635	1.312	1.1253		3.9559	2.7032	2.3505	1.7014	1.4416
1.9458	0.97911	0.73879	0.6455	0.65207		2.5199	1.7146	1.522	1.4485	1.4672		2.2533	1.6662	1.4935	1.299	1.7315
2.1368	0.96973	0.66698	0.48409	0.39553		2.4544	1.6397	1.3627	1.0848	0.87673		3.0375	2.0163	1.7213	1.3994	1.1463
1.8726	0.9858	0.74429	0.54461	0.61096		2.537	1.7655	1.5498	1.2211	1.3588		2.6261	1.904	1.6448	1.0982	1.2368
2.0794	0.93316	0.67216	0.50426	0.40614		2.3801	1.6468	1.4243	1.1302	0.90101		3.7001	2.0636	1.658	1.1986	1.4046
1.8252	0.94672	0.70777	0.54461	0.55316		2.2795	1.6681	1.4671	1.2211	1.2093		2.6352	2.0491	1.8439	1.299	1.189
1.9534	1.1332	0.82636	0.54461	0.61604		2.6226	1.9362	1.6469	1.2211	1.3782		3.4534	2.6825	2.4077	1.7014	0.55576
2.1576	1.1171	0.826	0.58497	0.56753		2.7539	1.989	1.725	1.312	1.259		3.1712	2.2471	1.922	1.299	1.2247
1.8182	0.8253	0.62996	0.56479	0.54763		2.1989	1.5447	1.3831	1.2665	1.2091		2.4411	1.6011	1.3814	1.0982	0.41334
2.3254	1.2152	0.87304	0.60514	0.70205		2.7816	2.0682	1.7831	1.3575	1.5342		4.2729	3.0284	2.6315	1.8022	1.5374
1.9496	1.0234	0.75274	0.50426	0.5196		2.5493	1.8279	1.5694	1.1302	1.1495		2.6781	1.9431	1.6758	1.1986	1.7471
1.9045	0.84608	0.60663	0.42356	0.41147		2.2751	1.594	1.3485	0.9487	0.89724		2.4331	1.4611	1.1408	0.79778	1.0604
1.8912	0.93199	0.67193	0.46391	0.46395		2.4897	1.6856	1.4168	1.0394	1.0267		4.432	2.6097	2.1056	1.3994	1.5264
1.6846	0.81443	0.61439	0.52444	0.44481		2.0385	1.51	1.3472	1.1756	0.9763		2.8488	1.8024	1.5308	1.1986	0.41141
1.8698	0.92115	0.66041	0.48409	0.48171		2.2345	1.6201	1.3837	1.0848	1.0545		3.0251	2.0982	1.7989	1.299	0.41108
2.4831	1.1284	0.79627	0.54461	0.47786		3.0202	2.1242	1.7493	1.2211	1.0588		4.7257	3.0885	2.3775	1.3994	1.064
1.9189	0.87139	0.64992	0.54461	0.62655		2.0069	1.519	1.3861	1.2211	1.3821		2.4535	1.4688	1.2159	1.0982	0.73462
2.1708	1.0119	0.71132	0.48409	0.58505		2.5318	1.7748	1.4936	1.0848	1.2804		2.8817	1.9622	1.6708	1.1986	1.728
2.2826	0.96788	0.68985	0.62532	0.71123		2.925	1.8209	1.506	1.403	1.5483		5.408	3.0959	2.4472	1.903	1.3218
3.2763	1.3162	0.87643	0.62532	0.7323		3.5892	2.3911	1.9297	1.403	1.6125		10.364	6.1726	4.1234	2.004	1.9167
2.0787	1.0395	0.78006	0.60514	0.58268		2.4102	1.8636	1.6728	1.3575	1.2971		2.5759	1.9799	1.7406	1.299	1.6792
1.2027	0.49958	0.3465	0.30252	0.22216		1.3822	0.87288	0.73174	0.67691	0.49571		1.6526	1.028	0.89221	0.79778	0.28788
2.1365	1.1067	0.8463	0.70604	0.76589		2.8835	2.0714	1.8198	1.5852	1.7223		3.7727	2.7572	2.4388	1.903	1.405
1.9877	0.95146	0.67412	0.48409	0.50262		2.1324	1.6094	1.3945	1.0848	1.1176		2.807	1.9552	1.6083	0.99801	1.3031
1.2613	0.77719	0.58748	0.36304	0.34053		1.7149	1.3719	1.1966	0.81274	0.7504		2.0102	1.6839	1.5519	1.0982	1.0586
2.3887	0.90818	0.62025	0.48409	0.42873		2.4859	1.6396	1.3631	1.0848	0.94695		4.9603	2.9276	2.0147	1.0982	0.47507
2.3727	1.0766	0.80863	0.70604	0.74627		2.8537	2.0061	1.7627	1.5852	1.6689		3.8799	2.5048	2.1239	1.8022	1.2862
2.429	1.1005	0.76101	0.50426	0.55435		2.7498	1.8855	1.5766	1.1302	1.2123		3.5489	2.2493	1.8036	1.1986	1.4583
2.5092	1.086	0.7744	0.6455	0.67183		3.3609	2.0577	1.6945	1.4485	1.4762		5.0733	2.8942	2.3399	2.004	2.0425
2.3004	1.0157	0.71148	0.52444	0.6448		2.6017	1.8022	1.5173	1.1756	1.4262		4.1434	2.7866	2.2837	1.5	1.6927
2.0616	0.87017	0.61936	0.48409	0.41476		2.6817	1.7158	1.4034	1.0848	0.90945		5.6065	3.0933	2.2443	1.3994	0.81681
3.3254	1.2505	0.81198	0.52444	0.55207		3.623	2.2856	1.7891	1.1756	1.2153		8.1361	4.1603	2.5682	0.89785	0.86317
2.6308	0.98358	0.68705	0.54461	0.56362		2.8031	1.8843	1.5706	1.2211	1.2323		5.9325	2.7248	1.7284	1.0982	1.3171
2.5152	0.95921	0.68624	0.52444	0.5703		2.5008	1.7914	1.5488	1.1756	1.2618		9.4494	3.944	2.0003	0.89785	1.1302
2.4537	0.94474	0.65052	0.34287	0.25239		2.4859	1.7765	1.4706	0.76745	0.56283		3.4586	0.61079	0.27994	0.099445	0.40371
3.2833	1.169	0.74518	0.36304	0.31323		2.9564	2.0917	1.6594	0.81274	0.68607		0	0	0	0	0.35114
2.4469	1.1805	0.83911	0.50426	0.57461		3.0109	2.1619	1.8056	1.1302	1.2623		4.4799	3.0349	2.3191	0.99801	1.3079
2.2003	1.0568	0.77291	0.58497	0.57748		2.6626	1.922	1.6651	1.312	1.2896		2.8638	2.1648	1.9091	1.5	1.5264
2.2985	1.0828	0.79899	0.62532	0.56612		2.683	1.9477	1.7186	1.403	1.2814		3.1431	2.4332	2.1191	1.6006	1.0946
2.3607	1.1679	0.83168	0.66568	0.68075		2.7105	1.9732	1.7097	1.494	1.5206		3.8151	2.8203	2.497	1.903	1.2603
2.586	1.3711	1.0183	0.72622	0.79084		3.281	2.4088	2.1008	1.6308	1.7483		4.7161	3.3499	2.9745	2.2062	1.6062
2.598	1.2995	0.95897	0.68586	0.60085		3.3566	2.3784	2.0366	1.5396	1.3203		3.9468	2.8535	2.5307	2.004	1.041
2.2736	0.99525	0.7165	0.58497	0.71968		2.523	1.7844	1.5558	1.312	1.6056		2.8429	1.9259	1.6197	1.1986	1.1664
1.8207	0.71647	0.49844	0.34287	0.38448		2.2313	1.4166	1.1441	0.76745	0.85278		6.6771	3.9654	2.6373	0.89785	1.1526
1.7885	0.7535	0.5298	0.44374	0.48919		1.8571	1.3186	1.1297	0.99406	1.0819		3.4022	2.2782	1.813	1.1986	0.98479
2.1826	1.029	0.69587	0.48409	0.52811		2.4914	1.7318	1.4189	1.0848	1.1735		3.709	2.6551	2.2545	1.5	1.1263
3.1015	1.4007	0.90932	0.56479	0.6734		3.3627	2.3424	1.8838	1.2665	1.4883		5.8877	4.1504	3.254	1.7014	1.3357
2.0558	1.0153	0.72631	0.54461	0.33959		2.6572	1.8672	1.5722	1.2211	0.74898		3.5846	2.6405	2.2226	1.5	0.37656
1.9786	0.99577	0.73016	0.60514	0.54085		2.6822	1.9029	1.6077	1.3575	1.1962		3.4719	2.5272	2.0613	1.3994	0.98574
2.2577	1.1611	0.83082	0.52444	0.49415		3.0535	2.1548	1.7765	1.1756	1.0863		4.0363	2.9632	2.5187	1.6006	0.7713
2.2245	1.1213	0.79311	0.60514	0.64307		2.7644	2.0049	1.6783	1.3575	1.4138		3.9929	2.9727	2.5502	1.8022	2.0601
2.4779	1.2424	0.90204	0.68586	0.78204		3.2234	2.278	1.9314	1.5396	1.7351		3.573	2.7134	2.355	1.7014	2.3839
2.3106	1.2397	0.87756	0.54461	0.66972		3.1283	2.1797	1.804	1.2211	1.4793		3.9202	2.7886	2.342	1.299	2.5001
1.6197	0.69418	0.52884	0.56479	0.60023		1.7977	1.2138	1.1118	1.2665	1.3158		2.9096	1.8243	1.6115	1.6006	0.61076
1.8279	1.001	0.71461	0.48409	0.45535		2.2562	1.7359	1.4677	1.0848	0.9975		3.5274	2.7832	2.4631	1.7014	1.0649
1.661	0.87107	0.62033	0.42356	0.45697		1.9605	1.4487	1.2336	0.9487	1.0089		2.8461	2.0304	1.7796	1.3994	1.1902
2.221	1.1748	0.8308	0.52444	0.52093		2.8328	2.1115	1.7555	1.1756	1.1425		3.7625	2.9021	2.5361	1.6006	1.423
3.1444	1.176	0.74654	0.52444	0.53371		3.1673	2.0605	1.6154	1.1756	1.1806		6.3991	4.1488	2.9347	1.3994	1.5591
3.1051	1.2703	0.84849	0.54461	0.51832		3.1159	2.1715	1.7921	1.2211	1.1486		3.8225	2.5135	1.9011	0.99801	1.1448
3.3425	1.4013	0.97307	0.6455	0.68127		3.5111	2.4579	2.0869	1.4485	1.4947		3.2993	2.1073	1.6543	1.0982	1.2658
3.0593	1.2874	0.89331	0.58497	0.54548		3.6325	2.3242	1.9114	1.312	1.2146		4.2953	2.7131	2.1474	1.3994	1.4468
2.2094	1.084	0.78809	0.62532	0.6732		2.5456	1.8479	1.6204	1.403	1.5088		3.07	1.8676	1.5737	1.3994	1.8757
3.2151	1.3783	0.90949	0.56479	0.56071		3.7021	2.4271	1.9323	1.2665	1.2431		5.5082	3.4183	2.5839	1.3994	2.3639
1.9875	1.0504	0.82277	0.58497	0.4909		2.7803	1.9778	1.773	1.312	1.0914		2.9759	2.0382	1.7743	1.299	1.5385
3.2848	1.2858	0.8867	0.60514	0.5718		3.7223	2.2369	1.8583	1.3575	1.2584		1.7679	1.1597	0.98879	0.79778	1.35
1.723	1.001	0.78892	0.56479	0.53799		2.2704	1.8074	1.6592	1.2665	1.1893		2.0827	1.6164	1.4735	1.1986	1.5634
3.1483	1.5025	1.0692	0.80694	0.79639		3.855	2.625	2.2506	1.8133	1.7593		4.1422	2.8037	2.2922	1.6006	0.89873
7.3812	4.0057	2.8745	1.1703	1.1038		1.0869	0.98733	0.97558	1.0712	1.0051		3.7041	2.7203	2.3651	1.9332	0.85656
6.429	3.6488	2.7009	1.0895	1.0879		1.0638	0.98343	0.97276	0.99651	0.99517		2.2114	1.4184	1.1729	0.84906	0.48382
6.0404	3.3566	2.4561	1.1299	1.0945		1.1237	1.0163	0.98719	1.0338	0.99758		4.3803	3.2115	2.7802	2.3741	0.65689
6.5558	3.5883	2.585	0.92804	0.73812		0.99291	0.92394	0.90239	0.84749	0.67502		0.5756	0.53363	0.4784	0.42254	0.96462
6.2043	3.3997	2.4899	0.94823	1.0076		0.99058	0.92593	0.9147	0.86609	0.92428		0.29909	0.36192	0.28617	0.21077	1.2988
6.4734	3.5803	2.6466	1.0693	1.1589		1.0213	0.94155	0.9288	0.97786	1.0651		3.4029	1.6941	1.288	1.2796	1.1372
8.0187	4.1605	2.9669	1.0693	1.1485		1.0834	0.9824	0.96447	0.97786	1.0493		0.53004	0.84129	0.92242	1.0638	1.2799
7.4361	4.1528	2.9511	0.9886	1.0061		1.0166	0.93737	0.91323	0.90332	0.92396		2.4902	1.6801	1.338	1.2796	0.94586
6.8419	3.6917	2.6825	1.0088	1.0049		0.97103	0.9093	0.90214	0.92194	0.91749		1.0104	1.041	1.0495	1.0638	0.96112
5.8221	3.2719	2.4272	0.94823	0.94558		1.0048	0.93613	0.91875	0.86609	0.86132		1.2965	0.81828	0.69111	0.63529	0.69886
7.7919	3.9203	2.7677	0.9886	0.67685		1.1463	0.9837	0.9387	0.90332	0.61412		0.82982	0.92689	0.96565	1.0638	0.91875
5.4056	3.4549	2.6663	1.1097	1.1116		1.0308	0.98072	0.97661	1.0152	1.0136		2.7004	2.0638	1.7674	1.2796	0.86469
6.2323	3.25	2.3921	1.0693	1.3304		1.1909	1.0528	1.0116	0.97786	1.214		2.506	1.6573	1.3764	1.2796	1.0943
7.1297	3.7133	2.6661	1.0088	1.0545		1.1159	0.99781	0.96266	0.92194	0.96227		0.86967	1.1076	1.0327	0.84906	0.76278
7.0145	4.113	3.086	1.0693	1.1184		1.0989	1.0083	0.99792	0.97786	1.0238		0.29899	0.28928	0.26776	0.21077	1.1635
5.6345	2.9229	2.1553	0.9886	0.95977		1.2051	1.0464	0.99486	0.90332	0.87075		0.85301	0.46594	0.35051	0.21077	0.67311
5.8511	3.3582	2.5542	1.1501	0.87383		1.1587	1.0554	1.0345	1.0525	0.79748		4.2705	3.0358	2.5293	1.9332	0.64191
6.4269	3.5202	2.5989	1.0492	1.0924		1.0904	1.0183	0.99802	0.95921	1.0001		3.126	0.86712	0.77285	0.84906	0.90744
7.3038	3.9245	2.8332	1.0492	1.0192		1.0939	0.99194	0.96793	0.95921	0.93106		1.3696	1.3144	1.2953	1.2796	0.90758
6.9492	4.3355	3.1715	0.94823	0.93042		1.0776	1.012	0.9834	0.86609	0.84653		0.98725	0.70157	0.59356	0.42254	0.67035
6.9406	3.8803	2.8033	1.0895	1.0591		1.1303	1.0176	0.98231	0.99651	0.96376		2.2239	1.9377	1.8602	1.9332	0.48506
7.2474	4.3234	3.1311	0.94823	0.90191		1.1676	1.0636	1.0163	0.86609	0.82703		1.0035	0.7209	0.651	0.63529	0.80107
7.3097	4.0964	2.9853	1.0895	0.98733		1.0278	0.98314	0.97991	0.99651	0.89975		9.2152	2.8517	1.7044	1.2796	0.76225
9.0933	5.1971	3.6955	1.0492	0.96483		1.1295	1.0732	1.0557	0.95921	0.89209		0.0015604	0.063621	0.13119	0.21077	0.93886
6.675	4.1584	3.0834	1.0693	1.0871		1.085	1.0254	1.0058	0.97786	0.99014		1.2272	1.071	1.1796	1.2796	1.4127
7.925	4.4454	3.1739	1.0693	1.0765		1.1576	1.0506	1.0136	0.97786	0.98308		1.8959	1.664	1.7574	1.9332	1.1958
6.6892	3.6054	2.6556	1.029	1.0944		1.1211	1.0126	0.98754	0.94057	1.0031		0.46916	0.44725	0.43922	0.42254	0.93873
6.9785	4.0485	2.9548	1.029	0.88562		1.1617	1.0448	1.0118	0.94057	0.80175		0.59214	0.61892	0.63705	0.63529	1.0041
6.456	3.3979	2.4995	1.0895	1.1731		1.1025	1.0372	1.0172	0.99651	1.0725		6.1646	2.0653	1.3311	1.0638	0.85979
8.0931	4.2422	2.9899	1.0693	1.2485		1.2985	1.1584	1.1033	0.97786	1.1285		2.0814	1.4435	1.2833	1.0638	1.276
7.8191	4.2641	3.0599	1.0492	1.111		1.1673	1.0519	1.0229	0.95921	1.0068		1.1176	0.68129	0.51716	0.42254	1.2397
10.397	5.7556	3.9191	0.96841	0.92947		1.2236	1.1231	1.0688	0.8847	0.85307		1.9313	1.271	0.98259	1.0638	0.94542
7.0526	3.9965	2.9317	1.0693	1.0177		1.2037	1.0963	1.0591	0.97786	0.92419		1.7176	1.0698	0.90312	0.84906	1.1424
5.4248	3.1362	2.3804	1.0492	0.9839		1.1195	1.0227	1.0015	0.95921	0.90288		0.49415	0.43801	0.45051	0.42254	0.79327
4.3248	2.6079	2.063	1.1097	1.1252		1.2315	1.0708	1.0324	1.0152	1.0262		2.661	1.8758	1.6049	1.2796	0.82013
6.4787	3.8613	2.8169	0.96841	0.73255		0.97868	0.91606	0.88936	0.8847	0.66819		2.3793	1.9025	2.0339	2.1531	0.64478
5.8788	3.3605	2.5551	1.2107	1.3078		1.2215	1.109	1.0795	1.1086	1.2055		3.1725	2.3984	2.1301	1.9332	1.2129
5.0042	2.8493	2.1671	1.029	0.99915		0.99846	0.89385	0.88396	0.94057	0.923		1.43	1.3775	1.4009	1.2796	0.88437
4.3846	2.5917	2.0373	1.0693	0.96237		1.0316	0.89834	0.88623	0.97786	0.88812		3.9977	2.6454	2.1506	1.7143	0.9391
5.0365	2.9734	2.2047	0.80694	0.7009		0.80481	0.783	0.77837	0.73605	0.63274		0.65078	0.38536	0.29968	0.21077	0.32579
5.492	3.3248	2.4447	0.80694	0.8764		0.90774	0.85746	0.83531	0.73605	0.79321		0.33904	0.21168	0.21078	0.21077	0.67856
5.1089	2.8481	2.121	0.88768	0.96963		0.87463	0.82155	0.81549	0.81031	0.88688		0.77584	0.82928	0.91199	0.84906	0.69719
6.2235	3.2711	2.3727	0.94823	0.93902		0.9437	0.85697	0.84184	0.86609	0.84881		0.60771	0.97182	1.2789	1.4964	0.77678
5.8181	3.1243	2.324	0.9886	0.81452		0.99607	0.90914	0.89822	0.90332	0.73439		0.34736	0.3813	0.39379	0.42254	0.5298
7.0313	3.8609	2.7432	0.84731	0.86932		0.91633	0.86566	0.84407	0.77316	0.78496		4.6172	1.622	0.96109	0.63529	0.58263
5.6242	3.1446	2.3389	0.96841	0.94326		0.95404	0.89136	0.87735	0.8847	0.85585		1.2614	0.954	0.81327	0.63529	1.3003
5.4702	3.0231	2.1828	0.94823	0.99579		1.272	1.0691	0.99079	0.86609	0.91218		4.229	2.3163	1.7687	1.2796	0.55801
7.2251	4.1937	3.1403	1.1501	1.0382		1.1246	1.0711	1.0679	1.0525	0.95007		1.0165	0.65082	0.48785	0.42254	0.6842
7.3913	3.9753	2.8562	1.0088	0.96085		1.2307	1.0845	1.0404	0.92194	0.87712		0.45982	0.33556	0.28118	0.21077	1.1246
8.5084	4.5689	3.3081	1.2712	1.2801		1.2549	1.1511	1.1226	1.1647	1.1683		0.22566	1.6164	1.9351	2.1531	1.4724
8.1952	4.4274	3.2211	1.2511	1.1703		1.2578	1.1667	1.1436	1.146	1.0611		5.2709	2.7494	1.8912	1.4964	1.6878
7.6058	4.3801	3.1846	1.0693	0.86667		1.2562	1.152	1.1086	0.97786	0.78244		0.54894	0.75993	0.77886	0.84906	0.65222
6.7337	3.8047	2.811	1.1299	1.1098		1.1824	1.093	1.0626	1.0338	1.0138		2.8904	1.7801	1.588	1.4964	1.0879
8.8985	4.7485	3.3535	1.1097	1.0714		1.1841	1.1017	1.0789	1.0152	0.97502		2.0715	1.0116	0.63692	0.42254	1.386
6.8913	4.1162	3.067	1.1299	1.1425		1.211	1.1323	1.1074	1.0338	1.0527		0.83825	0.85877	0.81441	0.63529	1.2883
6.4808	3.7349	2.8065	1.1299	1.0932		1.1981	1.1308	1.1067	1.0338	1.0029		2.1528	1.0064	0.77973	0.63529	0.89178
5.3394	3.1633	2.4718	1.3318	1.3329		1.2504	1.1766	1.1626	1.221	1.2064		5.9005	3.4555	2.6872	2.3741	0.8587
7.2207	4.0849	2.9616	1.0492	1.0588		1.2423	1.1497	1.1038	0.95921	0.96719		0.5327	0.45022	0.43189	0.42254	0.72907
7.1075	4.108	3.069	1.3116	1.4186		1.2826	1.1874	1.1657	1.2022	1.3012		4.4684	3.2589	2.822	2.3741	1.4668
7.2284	4.2243	3.0821	1.0895	1.2311		1.1071	1.0687	1.0537	0.99651	1.1194		1.0133	0.82771	0.71563	0.63529	1.2149
8.1633	4.615	3.349	1.1299	1.2219		1.2453	1.1742	1.1427	1.0338	1.1055		1.129	0.71844	0.72023	0.84906	1.1441
7.8199	4.6877	3.4589	1.0895	1.2678		1.2512	1.1755	1.1445	0.99651	1.1533		0.76508	0.38454	0.26916	0.21077	1.074
8.8878	4.7063	3.3762	1.2107	1.1909		1.2643	1.1506	1.1257	1.1086	1.0802		3.3644	1.6471	1.2325	1.0638	0.9696
9.1762	4.9835	3.5752	1.2309	1.311		1.2718	1.1738	1.1536	1.1273	1.206		0.2411	0.42906	0.50332	0.63529	1.275
9.5856	5.0804	3.5873	1.3318	1.2907		1.3277	1.1908	1.153	1.221	1.1848		2.3154	2.2087	2.1054	2.1531	1.2894
7.1687	3.9357	2.9057	1.2914	1.0883		1.3765	1.2181	1.1695	1.1835	0.99339		5.0075	3.4463	2.9346	2.3741	0.71949
8.3924	4.7945	3.4791	1.2511	1.2104		1.2494	1.1798	1.1593	1.146	1.1082		5.5667	2.7908	1.859	1.2796	1.2078
9.0433	4.8257	3.443	1.2914	1.3289		1.331	1.2218	1.1923	1.1835	1.2073		3.4943	2.2487	1.898	1.7143	1.3831
8.9284	4.9348	3.5691	1.2914	1.115		1.2535	1.1969	1.188	1.1835	1.0118		2.3333	1.4024	1.175	1.0638	1.0294
10.404	5.7073	3.947	1.1097	1.0568		1.3478	1.2273	1.1793	1.0152	0.97193		0.20496	0.32151	0.34948	0.42254	1.2496
8.6261	5.2821	3.8124	1.0693	1.1658		1.3241	1.2295	1.1839	0.97786	1.0628		0.41086	0.32666	0.27901	0.21077	1.1914
9.0088	4.998	3.6065	1.2914	1.2592		1.3087	1.2276	1.2106	1.1835	1.1515		18.484	4.9046	2.0839	1.2796	1.384
7.8089	4.4244	3.2253	1.1905	1.1569		1.3098	1.2367	1.2036	1.0899	1.048		3.3236	1.7966	1.2987	1.0638	0.63207
8.7581	5.2573	3.8317	1.1299	1.0642		1.3285	1.2479	1.2108	1.0338	0.97		1.1574	0.72227	0.57713	0.42254	0.79299
7.5491	4.4882	3.3091	1.0693	1.1002		1.196	1.1378	1.1106	0.97786	1.0051		2.4662	1.5155	1.1779	0.84906	1.1141
9.3754	4.7221	3.2821	1.1501	1.1798		1.3267	1.1668	1.1198	1.0525	1.0789		0.015462	0.12509	0.15499	0.21077	1.5421
8.0913	5.0853	3.8138	1.3924	1.5601		1.4433	1.3284	1.295	1.2773	1.4219		4.0457	3.0911	2.6356	1.9332	1.7885
7.9033	4.4452	3.3165	1.352	1.4156		1.3844	1.2937	1.2768	1.2397	1.2975		0.44827	0.53825	0.59016	0.63529	1.1265
9.3011	5.1135	3.7446	1.352	1.2888		1.5268	1.3591	1.3166	1.2397	1.1792		0.84761	0.64968	0.61809	0.63529	0.9389
6.7804	3.804	2.909	1.4328	1.3864		1.4065	1.333	1.3214	1.3148	1.2593		3.092	2.0314	1.6434	1.2796	1.3246
9.3643	5.0114	3.5819	1.2107	1.1743		1.4383	1.2962	1.248	1.1086	1.0698		0.82873	0.72282	0.70725	0.63529	0.85257
9.1348	5.1049	3.7238	1.4126	1.2274		1.4655	1.3528	1.3244	1.296	1.1218		2.8466	1.8547	1.576	1.2796	1.472
10.557	6.2583	4.4982	1.3924	1.4592		1.4109	1.3423	1.3229	1.2773	1.3333		2.6282	1.6921	1.2902	1.0638	1.074
10.805	6.0216	4.3283	1.3722	1.4017		1.4903	1.3692	1.3407	1.2585	1.2795		6.2026	1.1219	0.71199	0.63529	0.96512
8.8117	4.6852	3.3854	1.2914	1.4659		1.3774	1.2595	1.2268	1.1835	1.3241		1.3379	0.87299	0.73939	0.63529	0.93013
8.1856	4.4548	3.1758	1.1905	1.3091		1.2902	1.1603	1.1223	1.0899	1.1971		2.9203	2.0933	1.7729	1.4964	1.5638
3.4371	2.1435	1.6868	0.84731	0.8812		0.95232	0.84641	0.81811	0.77316	0.79766		0.49346	0.51042	0.4887	0.42254	1.0423
4.9925	2.8768	2.1412	0.72622	0.75506		0.8285	0.75699	0.73957	0.6619	0.69648		0.61113	0.40394	0.32306	0.21077	0.66227
5.949	3.0936	2.2071	0.86749	1.0838		1.0459	0.90606	0.8612	0.79173	0.99139		0.76118	1.1536	1.3334	1.2796	1.3526
3.9944	2.4334	1.8269	0.7464	0.8966		0.78093	0.71032	0.69149	0.68043	0.81382		1.9189	1.4613	1.2584	0.84906	0.26353
2.9882	1.7765	1.3816	0.70604	0.7887		0.79266	0.71864	0.69048	0.64338	0.72128		1.1888	0.91317	0.7844	0.63529	0.92192
5.4389	2.9146	2.2164	1.352	1.4222		1.4875	1.2634	1.1907	1.1051	1.17		2.5936	1.5667	1.3629	1.2546	0.91689
6.0699	3.1612	2.3491	1.2914	1.1205		1.4123	1.2567	1.1948	1.0552	0.91207		2.1954	1.3959	1.1839	1.0739	1.2798
7.0326	3.4496	2.493	1.2914	1.3297		1.4946	1.3118	1.2405	1.0552	1.0958		5.1924	1.5639	1.0479	0.80369	1.3593
6.568	3.3231	2.4109	1.2511	1.2506		1.5997	1.3698	1.2637	1.022	1.0176		1.5675	0.95275	0.83893	0.80369	1.2012
6.4281	3.2636	2.4253	1.3924	1.2775		1.5743	1.3384	1.2645	1.1384	1.0693		3.3314	1.6503	1.2138	0.98368	0.82272
6.4892	3.2575	2.373	1.2107	1.3387		1.4828	1.2957	1.2095	0.98875	1.1002		1.4897	0.8701	0.73281	0.71388	0.80987
6.0062	3.1527	2.3618	1.2914	1.286		1.4195	1.2836	1.2228	1.0552	1.0571		1.7019	1.0325	0.81714	0.71388	1.2991
7.4317	3.4352	2.4091	1.1299	1.1636		1.6767	1.3497	1.2185	0.92235	0.9563		1.0479	0.63225	0.5052	0.35593	0.99339
6.3282	3.2102	2.3906	1.3924	1.7531		1.5261	1.3126	1.2396	1.1384	1.4445		2.1706	1.7134	1.5238	1.3452	1.6012
5.5937	3.0763	2.3111	1.2712	1.2682		1.558	1.3176	1.2277	1.0386	1.0325		1.7728	1.3306	1.1574	0.89362	0.83148
5.4335	3.0478	2.3335	1.2309	1.3005		1.4705	1.2834	1.2166	1.0054	1.0567		0.73006	0.60488	0.54339	0.44523	0.96459
5.9719	3.1757	2.3797	1.4328	1.5203		1.5964	1.3347	1.2441	1.1717	1.2506		2.6054	1.9907	1.8027	1.7088	1.4099
6.7224	3.3481	2.4691	1.3924	1.401		1.5087	1.3075	1.2404	1.1384	1.1396		1.2399	1.3586	1.3896	1.4359	1.2664
6.1432	3.2839	2.4798	1.3924	1.3575		1.4873	1.3201	1.2645	1.1384	1.1158		1.652	1.3023	1.1485	1.0739	0.9185
5.9757	3.187	2.3858	1.2511	1.2141		1.4754	1.3137	1.2419	1.022	1.0057		1.1346	0.80948	0.725	0.71388	1.0026
6.5186	3.414	2.5648	1.4934	1.6289		1.4704	1.3501	1.3098	1.2217	1.3436		2.5975	1.612	1.4294	1.3452	1.343
5.6409	3.1489	2.4371	1.3924	1.545		1.584	1.4204	1.3539	1.1384	1.2763		1.594	1.2125	1.1103	1.0739	1.5341
7.3862	3.5369	2.5421	1.352	1.234		1.5861	1.3633	1.274	1.1051	1.0203		2.7059	1.4796	1.2454	1.0739	1.2743
5.5818	3.081	2.3944	1.4328	1.4637		1.4581	1.3362	1.2951	1.1717	1.2085		2.1377	1.5374	1.364	1.2546	1.4377
4.2335	2.5229	1.9785	1.1299	0.94921		1.3734	1.1886	1.1166	0.92235	0.78538		2.0432	1.5143	1.2984	0.89362	0.53004
5.1329	2.7707	2.1184	1.3318	1.0981		1.3629	1.1914	1.1334	1.0885	0.89866		2.1205	1.4926	1.2782	1.1642	1.0488
6.3621	3.2316	2.3449	1.2309	1.21		1.3891	1.2328	1.1592	1.0054	0.99926		0.023814	0.45335	0.68119	0.89362	0.95698
4.6101	2.7152	2.1029	1.1905	1.1515		1.3974	1.2186	1.1512	0.97215	0.94466		2.0157	1.4778	1.2499	0.89362	0.8934
4.8115	2.7788	2.1895	1.352	1.1766		1.3247	1.2023	1.1717	1.1051	0.96785		2.1065	1.4143	1.2182	0.98368	1.2467
5.5106	2.7807	2.0848	1.2309	1.0688		1.3759	1.1757	1.1132	1.0054	0.87529		2.8304	1.6233	1.3767	1.2546	0.9949
5.8065	3.048	2.2777	1.3116	1.5989		1.4526	1.2345	1.1725	1.0718	1.3143		2.7313	1.8393	1.5313	1.2546	1.6551
5.5354	2.9606	2.1928	1.1299	1.0819		1.3454	1.1892	1.1162	0.92235	0.88391		1.4225	1.0297	0.90438	0.80369	0.8241
6.2511	3.169	2.3318	1.3722	1.3669		1.3658	1.2193	1.1688	1.1218	1.1192		6.0266	2.2951	1.8104	1.7088	1.1547
5.2426	2.8843	2.2587	1.4934	1.3031		1.4374	1.2664	1.2194	1.2217	1.0867		1.8375	1.668	1.6465	1.7088	1.0492
5.0078	2.7326	2.1145	1.2914	1.1991		1.4534	1.2372	1.1684	1.0552	0.9972		2.5014	1.6877	1.4034	0.98368	1.2555
5.5705	2.953	2.2486	1.352	1.3275		1.3911	1.2224	1.171	1.1051	1.078		2.3931	1.9776	1.7416	1.4359	0.78437
5.1098	2.7632	2.1157	1.2511	1.1936		1.3709	1.1944	1.135	1.022	0.96703		1.529	1.2325	1.0778	0.89362	1.2446
4.9866	2.4903	1.8443	1.1097	1.1279		1.1146	0.97769	0.9343	0.90576	0.92852		1.882	1.4249	1.3061	1.2546	0.79817
4.529	2.4955	1.916	1.0693	1.1945		1.2942	1.0962	1.0284	0.8726	0.98948		1.3636	0.97923	0.85604	0.71388	0.88881
4.9035	2.6429	2.0243	1.1501	1.132		1.151	1.0534	1.031	0.93895	0.92852		2.9521	1.2433	0.92578	0.80369	1.1605
4.1576	2.3475	1.8407	1.0895	0.97544		1.2146	1.0757	1.0248	0.88918	0.79085		0.95528	0.67944	0.64584	0.6242	0.80216
4.0501	2.3566	1.8799	1.1703	1.1576		1.1541	1.0562	1.0331	0.95554	0.95775		1.6451	1.2707	1.1239	0.89362	1.2229
4.6108	2.5854	2.037	1.2309	1.3373		1.2137	1.1158	1.0917	1.0054	1.1113		3.9142	1.6399	1.1864	0.98368	1.0336
4.426	2.4755	1.8834	1.1501	1.1249		1.2672	1.0672	1.001	0.93895	0.93276		1.978	1.765	1.5849	1.3452	1.0843
5.3141	2.6609	1.9831	1.029	1.0967		1.3067	1.0963	1.0266	0.83945	0.88659		1.0263	0.68469	0.58631	0.53465	0.658
4.4697	2.6091	2.0471	1.2107	1.1161		1.4681	1.2204	1.1389	0.98875	0.92649		1.9981	1.5158	1.3262	1.0739	1.048
4.5746	2.4289	1.8235	1.0693	1.1984		1.2495	1.0402	0.97109	0.8726	0.98084		2.2403	1.5226	1.2992	1.0739	0.6117
4.4376	2.5213	1.9803	1.2511	1.0787		1.2436	1.0874	1.0532	1.022	0.88486		1.7599	1.1928	1.0396	0.98368	0.86958
5.0669	2.6886	2.0366	1.2511	1.2516		1.2482	1.107	1.0627	1.022	1.0263		2.9279	2.1182	1.7048	1.2546	1.6899
5.975	2.9612	2.1819	1.2712	1.2679		1.2042	1.0923	1.0632	1.0386	1.0533		3.6029	1.5386	1.2159	1.0739	1.091
5.5783	2.7405	2.0257	1.2309	1.1622		1.254	1.0912	1.0398	1.0054	0.97286		1.7502	1.3509	1.1735	1.0739	0.83872
4.7914	2.573	1.9741	1.2107	1.2579		1.2588	1.1014	1.054	0.98875	1.037		1.8975	1.4086	1.2283	0.98368	0.93592
4.5544	2.6026	2.0383	1.3318	1.5203		1.4359	1.1937	1.122	1.0885	1.2442		2.2742	1.6965	1.4729	1.2546	1.1402
4.7616	2.5691	1.9596	1.1299	0.98779		1.2393	1.1014	1.0514	0.92235	0.80342		1.4173	0.97364	0.86062	0.71388	0.72131
5.9974	3.0807	2.2702	1.2712	1.3737		1.3792	1.1972	1.1346	1.0386	1.1326		5.7888	3.0663	1.9889	1.3452	1.1154
4.4897	2.4475	1.9004	1.1703	1.2516		1.2076	1.077	1.0377	0.95554	1.0468		0.99349	0.83518	0.85371	0.98368	1.2429
5.1023	2.7219	2.0664	1.1905	1.1761		1.2316	1.1084	1.0687	0.97215	0.96638		2.8215	1.3022	0.98314	0.89362	0.83237
3.8209	2.4278	1.9561	1.1299	1.2389		1.1642	1.1005	1.0799	0.92235	1.0211		1.1662	0.9078	0.81079	0.6242	0.75197
4.2564	2.4267	1.8672	1.029	0.75692		1.2642	1.0959	1.0302	0.83945	0.61455		1.9588	1.3002	1.0996	0.80369	1.0534
4.5889	2.5158	1.9736	1.1905	1.2338		1.4569	1.1712	1.0986	0.97215	1.0173		1.7929	1.2633	1.0738	0.80369	1.2995
4.594	2.4294	1.8206	1.0088	0.91967		1.1177	0.97618	0.92716	0.82288	0.74387		4.0557	1.7762	1.1722	0.71388	0.55773
3.9364	2.1874	1.6927	1.0693	0.84928		1.0452	0.92006	0.88907	0.8726	0.69669		1.1796	1.1501	1.1191	1.0739	0.75849
4.0002	2.2543	1.7672	1.0895	1.1947		1.1038	0.97914	0.95178	0.88918	0.98536		3.0632	1.5354	1.2572	1.0739	1.1543
5.3118	2.5994	1.9539	1.3116	1.2616		1.3181	1.0572	1.0085	1.0718	1.0285		3.5789	1.9207	1.5896	1.3452	1.454
4.8619	2.7263	2.0876	1.1905	1.1648		1.3672	1.1859	1.1152	0.97215	0.96451		0.95823	0.92331	0.87126	0.80369	0.61683
4.3881	2.5239	2.003	1.2511	1.3086		1.3514	1.1745	1.1187	1.022	1.0847		1.8032	1.3125	1.1853	1.0739	0.94086
4.7458	2.6775	2.1147	1.352	1.2286		1.4332	1.247	1.1887	1.1051	1.0185		3.2417	2.1284	1.7801	1.3452	0.75281
6.0704	3.091	2.236	1.1703	0.99367		1.3182	1.1594	1.0965	0.95554	0.82186		2.0544	1.3783	1.1802	0.98368	0.58687
4.7263	2.48	1.8724	1.029	0.88803		1.2144	1.042	0.98292	0.83945	0.72651		0.5911	0.50239	0.48752	0.44523	0.60549
4.0698	2.4568	1.9631	1.3116	1.131		1.3091	1.1705	1.1179	1.0718	0.92092		2.4475	2.0769	1.9105	1.6177	1.0604
5.0722	2.7383	2.1132	1.2309	1.1986		1.4888	1.2177	1.1433	1.0054	1.0024		1.3464	0.98338	0.85025	0.71388	0.80215
4.7783	2.4499	1.9243	1.3924	1.2905		1.2499	1.0391	1.0214	1.1384	1.0689		6.5862	1.5997	1.4472	1.5267	0.95224
4.7229	2.5985	1.9891	1.1501	1.0443		1.215	1.0841	1.0421	0.93895	0.86056		1.5758	1.0519	0.84553	0.6242	0.73771
5.9351	2.9033	2.1306	1.2511	1.1838		1.3941	1.1541	1.0827	1.022	0.98358		11.023	2.8072	1.4198	0.89362	1.1793
5.8523	2.7968	2.061	1.2309	1.1204		1.3018	1.0862	1.0351	1.0054	0.92907		1.8035	1.439	1.3625	1.1642	1.2096
4.3077	2.5292	1.9313	1.0492	1.1619		1.3268	1.1407	1.0609	0.85602	0.96221		1.8139	1.2798	1.0838	0.80369	1.3916
4.7897	2.4503	1.9032	1.2914	1.2167		1.4448	1.1046	1.0446	1.0552	1.0115		3.5419	1.4212	1.1491	1.0739	0.85342
6.3969	3.284	2.4645	1.4934	1.4622		1.4811	1.3204	1.2694	1.2217	1.2085		6.1939	3.7822	2.6486	1.7088	0.94822
4.9152	2.7602	2.1233	1.3116	1.3016		1.5473	1.2896	1.1984	1.0718	1.077		2.1695	1.8057	1.6067	1.2546	0.98313
5.7944	2.7837	2.0244	1.2712	1.2007		1.4686	1.1474	1.0558	1.0386	0.98759		2.2286	1.5032	1.3654	1.1642	1.1059
5.3604	2.5734	1.9217	1.2511	1.1546		1.3712	1.0925	1.0306	1.022	0.95009		2.8354	1.6035	1.2418	0.89362	1.0285
3.9698	2.1994	1.7261	1.1299	1.1791		1.1778	1.0112	0.96544	0.92235	0.97017		1.7859	1.3624	1.2198	1.0739	1.0697
4.2847	2.287	1.7618	1.1501	1.0578		1.1102	0.96988	0.93725	0.93895	0.87091		2.257	1.7327	1.5992	1.4359	0.80198
4.2551	2.3678	1.8273	1.0693	0.8411		1.2295	1.0504	0.98676	0.8726	0.70745		2.3263	1.5589	1.3182	1.0739	0.6572
3.5653	2.0639	1.6265	1.029	1.1026		1.1597	0.97184	0.91599	0.83945	0.91828		1.8055	1.3429	1.1743	0.89362	0.61822
5.2359	2.9161	2.2744	1.3318	1.3358		1.4968	1.2981	1.2462	1.0885	1.0974		1.2291	0.89927	0.80267	0.71388	1.1891
5.2184	2.7274	2.0294	1.1703	1.2103		1.2902	1.081	1.0262	0.95554	0.98775		0.92253	0.8348	0.86646	0.89362	0.98389
5.0558	2.8476	2.2189	1.3722	1.4559		1.3082	1.2111	1.1849	1.1218	1.2038		2.2913	1.4382	1.2515	1.1642	1.0136
5.1562	2.8746	2.2358	1.3116	1.4129		1.2514	1.1809	1.1619	1.0718	1.1468		1.8614	1.0814	0.92575	0.89362	1.2648
5.5856	3.0846	2.4154	1.554	1.487		1.5994	1.3639	1.3124	1.2717	1.2171		3.397	1.9081	1.4714	1.2546	0.97601
3.3997	2.1163	1.7164	1.1501	1.0924		1.0938	0.97689	0.95248	0.93895	0.90732		2.7752	2.1526	1.8587	1.3452	0.74775
4.7386	2.4702	1.8926	1.1905	1.2003		1.3905	1.1164	1.0437	0.97215	0.99157		2.9094	1.8027	1.3803	0.89362	0.79674
5.9192	2.8993	2.1036	1.3116	1.4618		1.4894	1.1527	1.0667	1.0718	1.2115		2.3495	1.8447	1.4936	1.1642	1.3928
5.4655	2.842	2.1553	1.2914	1.4116		1.4796	1.2184	1.1526	1.0552	1.1663		1.5242	0.74487	0.61046	0.6242	1.4959
3.9957	2.2185	1.6822	0.96841	0.82251		1.0894	0.93195	0.88061	0.78976	0.67903		2.875	1.8909	1.485	1.1642	1.0716
4.6265	2.3517	1.7634	1.0895	0.98097		1.1088	0.93312	0.89554	0.88918	0.8091		0.77744	0.59163	0.59631	0.6242	0.35322
4.0906	2.1862	1.7349	1.2712	1.289		1.0569	0.92662	0.92131	1.0386	1.056		2.9881	1.9442	1.6506	1.3452	0.70824
3.9372	2.1625	1.6804	1.1299	1.1029		1.1099	0.93715	0.90449	0.92235	0.90297		1.9215	1.5361	1.3737	1.0739	0.85459
4.0736	2.1428	1.661	1.0492	1.1693		1.4083	1.0276	0.94333	0.85602	0.9565		1.5197	0.76556	0.60035	0.53465	0.4862
5.2314	2.6629	1.9791	1.2511	1.0311		1.2501	1.0667	1.0174	1.022	0.83894		1.8932	1.1999	1.1084	0.98368	1.2865
5.7042	2.5709	1.8539	1.1501	1.1385		1.4191	1.0739	0.97733	0.93895	0.93881		9.254	5.4091	2.9809	1.1642	0.84295
5.5109	2.6702	1.9452	1.1501	1.2664		1.1541	0.98285	0.94201	0.93895	1.0391		21.304	3.0268	1.3607	0.71388	0.64195
3.618	1.9737	1.5706	1.1097	1.0583		1.1312	0.92539	0.88515	0.90576	0.85935		3.9583	1.8434	1.3902	1.1642	1.0283
4.9464	2.2814	1.65	0.9886	0.99458		1.0312	0.85311	0.80995	0.80632	0.82993		1.3636	0.61498	0.52947	0.53465	0.82406
4.9628	2.5241	1.8627	1.1501	1.2892		1.4638	1.0914	0.99195	0.93895	1.0694		1.9084	1.3501	1.1367	0.98368	0.91486
5.7721	2.6947	1.97	1.1703	1.2315		1.6639	1.1975	1.0754	0.95554	1.0102		2.5174	1.2414	0.85882	0.71388	1.4571
3.9522	2.2027	1.7083	0.96841	0.7931		1.1528	0.98005	0.92747	0.78976	0.65105		1.3587	0.7312	0.62307	0.53465	0.50987
4.9351	2.3982	1.8192	1.1905	1.1488		1.5299	1.0609	0.978	0.97215	0.94997		2.6369	1.6415	1.1822	0.80369	0.69279
4.6877	2.4732	1.8471	1.1905	1.263		1.4547	1.0921	0.99847	0.97215	1.0334		2.1229	1.5411	1.3062	1.0739	1.0296
6.1223	2.7655	2.0068	1.2511	1.3248		1.5899	1.1167	1.0286	1.022	1.1056		4.5948	2.6188	1.7902	1.2546	0.94881
4.0544	2.0714	1.6156	1.0693	0.97171		1.1241	0.89081	0.86449	0.8726	0.79706		2.8322	1.5952	1.1457	0.80369	0.84393
4.6011	2.3549	1.774	1.1299	0.87119		1.3746	1.0191	0.94199	0.92235	0.70893		5.3285	2.4292	1.562	1.2546	0.94804
4.208	2.1946	1.6539	1.0693	1.1039		1.1187	0.8847	0.84351	0.8726	0.92		4.4302	2.669	1.7937	1.0739	0.9954
4.3592	2.268	1.743	1.1501	1.1375		1.4626	1.0509	0.96384	0.93895	0.94082		1.4627	1.029	0.96147	0.98368	0.89194
6.0383	2.8848	2.074	1.2511	1.5168		1.4241	1.1041	1.0283	1.022	1.2602		6.9195	3.2234	1.6503	0.80369	1.1271
4.9238	2.548	1.941	1.2107	1.1044		1.3826	1.1038	1.0379	0.98875	0.91111		1.61	1.04	0.84892	0.6242	0.86147
4.6857	2.4724	1.9151	1.352	1.3001		1.2473	1.0556	1.019	1.1051	1.0681		2.5825	1.8959	1.6247	1.3452	1.3748
5.8135	3.0107	2.2157	1.3116	1.6746		1.5559	1.2515	1.152	1.0718	1.4118		2.7077	1.6187	1.1697	0.89362	1.4603
5.5661	2.5326	1.8085	1.1299	1.0698		1.8668	1.1822	1.0098	0.92235	0.87243		7.2741	4.4417	2.849	1.0739	0.72754
4.218	2.0915	1.5478	1.0088	0.95518		1.5038	0.99187	0.8682	0.82288	0.79513		2.2535	1.443	1.1278	0.71388	0.75756
4.465	2.2321	1.6412	0.9886	0.96783		1.2609	0.94418	0.86119	0.80632	0.79246		0.5857	0.50998	0.53524	0.6242	0.85468
3.9504	2.1251	1.6178	1.1299	1.1239		1.3761	1.0292	0.92262	0.92235	0.92343		1.8089	1.2664	1.1384	1.0739	0.56226
6.4634	3.4735	2.6363	1.6146	1.5409		1.6526	1.4474	1.3811	1.3218	1.2775		3.0372	2.4255	2.1802	1.8914	1.5765
6.7627	3.507	2.6223	1.453	1.574		1.6933	1.4579	1.3743	1.1884	1.3007		1.4512	1.2298	1.1512	1.0739	1.5359
7.2498	3.5849	2.6226	1.3924	1.5193		1.6974	1.455	1.3543	1.1384	1.2591		4.2479	1.586	1.1418	0.98368	0.90287
7.2704	3.5999	2.6381	1.3924	1.4161		1.7517	1.4858	1.3774	1.1384	1.1749		2.1481	1.3446	1.1121	0.89362	1.0375
5.7321	3.2922	2.565	1.453	1.3537		1.6879	1.4926	1.422	1.1884	1.1243		1.1148	0.72831	0.62333	0.53465	1.0925
5.7516	3.2304	2.5138	1.4732	1.1627		1.6789	1.4636	1.3915	1.205	0.95873		1.7479	1.426	1.2559	0.98368	1.3907
6.7131	3.567	2.7026	1.4328	1.7751		1.8022	1.5504	1.4565	1.1717	1.4415		1.2224	0.94665	0.83173	0.71388	0.90422
2.9979	1.7689	1.4191	0.90786	1.0166		0.82559	0.77823	0.77314	0.74011	0.82939		1.128	0.83283	0.74273	0.6242	0.70728
3.3622	1.9392	1.5113	0.88768	0.99602		1.0218	0.88086	0.83048	0.72357	0.83214		1.2403	1.0318	0.92413	0.71388	0.90222
4.4467	2.0366	1.4836	0.9886	1.1123		1.3794	0.88548	0.789	0.80632	0.91967		2.847	1.5722	1.1896	0.98368	0.45915
8.0566	3.4515	2.2824	1.1097	0.87549		1.346	1.1668	1.094	0.90909	0.71552		2.1211	1.1149	0.72083	0.56013	0.6438
7.5118	2.9856	2.0372	1.2107	1.1994		1.4559	1.146	1.0611	0.99243	0.97071		3.081	1.758	1.3157	1.1256	0.97674
6.8432	3.043	2.1068	1.3318	1.5275		1.4712	1.1919	1.1117	1.0926	1.2307		3.6823	2.2917	1.6925	1.1256	1.2239
5.66	2.7056	1.9641	1.1703	1.0622		1.4332	1.1728	1.0907	0.95908	0.87118		3.0023	1.8447	1.3936	0.93651	1.1691
6.1382	2.7724	1.956	1.1299	1.2095		1.3896	1.1412	1.0573	0.92575	0.97897		4.1279	2.4032	1.5725	1.031	0.94879
6.4756	2.877	1.9977	1.3318	1.3225		1.5341	1.2011	1.1005	1.0926	1.0798		2.901	2.0071	1.4864	1.031	1.2264
6.1396	2.8401	2.008	1.2107	1.3083		1.3608	1.1455	1.0771	0.99243	1.0678		1.149	0.8917	0.77099	0.654	1.0258
5.5179	2.5679	1.856	1.2107	1.3691		1.607	1.2062	1.0946	0.99243	1.1217		2.6798	1.5125	1.1668	0.84219	1.1245
7.0773	3.0856	2.0464	1.0895	1.2659		1.5265	1.1803	1.0563	0.89244	1.0265		1.7318	1.2942	0.949	0.56013	1.1793
6.5305	3.0939	2.1621	1.1905	1.1241		1.4812	1.2233	1.1274	0.97575	0.91156		3.5798	1.9875	1.4417	1.1256	0.8063
7.2241	3.1675	2.2199	1.352	1.3745		1.5178	1.2249	1.1558	1.1093	1.1168		3.998	2.3642	1.6349	1.2204	1.3981
9.119	3.6587	2.4718	1.3116	1.3111		1.6979	1.355	1.2637	1.0759	1.0729		6.7871	4.0637	2.0749	0.74802	0.91494
5.7357	2.4386	1.7218	1.029	1.02		1.5328	1.097	0.98294	0.8425	0.82277		1.8388	1.094	0.79991	0.56013	0.63624
5.9701	2.6801	1.8922	1.2107	1.1251		1.3571	1.0815	1.0071	0.99243	0.91271		4.1978	1.7427	1.1564	0.93651	0.88838
4.7216	2.3316	1.7606	1.1501	1.1238		1.2777	1.0421	0.98976	0.94241	0.91784		1.7307	1.2738	1.1603	1.031	1.1049
4.331	2.3359	1.8045	1.1501	0.93212		1.3976	1.1431	1.0717	0.94241	0.76082		2.7824	1.6779	1.3198	1.031	0.85353
6.1051	2.7166	1.9541	1.2107	1.1921		1.3435	1.1035	1.0394	0.99243	0.9778		4.5363	1.6042	1.2248	1.1256	0.74121
6.2543	2.9816	2.0375	1.0492	1.0211		1.3299	1.1052	1.0144	0.85914	0.82455		3.6409	2.1956	1.486	0.93651	0.8306
5.7866	2.7788	1.9641	1.1703	1.1266		1.4979	1.1834	1.074	0.95908	0.91733		1.7811	1.1048	0.9448	0.84219	0.75562
6.8684	2.9831	2.0193	1.1501	1.3073		1.3491	1.1019	1.0215	0.94241	1.057		4.4247	2.2096	1.5682	1.1256	1.0804
5.5131	2.6622	1.9347	1.2914	1.4614		1.1765	1.0395	1.0094	1.0592	1.2041		3.587	2.451	1.9489	1.5056	0.69976
6.5962	2.8673	1.9943	1.3116	1.4479		1.4087	1.1462	1.0715	1.0759	1.1843		6.8215	3.7923	2.4338	1.601	1.2619
5.8175	2.6385	1.8488	1.0895	0.8756		1.4163	1.1164	1.0211	0.89244	0.70764		2.5636	1.2985	0.85915	0.56013	0.22908
7.5734	3.4707	2.288	1.0693	0.87032		1.4052	1.1693	1.0735	0.87579	0.70577		1.3133	0.88665	0.7342	0.654	0.4271
5.8305	2.7864	1.9464	1.2309	1.2905		1.2811	1.0812	1.007	1.0091	1.0605		4.2388	2.3604	1.8624	1.601	1.053
6.1596	3.0192	2.0778	1.1905	1.347		1.3549	1.1519	1.0683	0.97575	1.1078		3.0706	1.9597	1.536	1.031	1.5814
5.793	2.8708	2.0496	1.3116	1.2125		1.384	1.1327	1.0584	1.0759	0.99965		3.4881	2.4563	2.1598	1.7922	0.70596
5.6157	2.8374	2.0457	1.3116	1.3695		1.4246	1.1908	1.1102	1.0759	1.1161		5.7678	3.8764	3.0322	1.7922	1.3681
6.6567	2.9394	2.0017	1.2914	1.554		1.4819	1.1598	1.0629	1.0592	1.2626		2.8508	2.0573	1.601	1.031	1.3397
6.6027	2.6555	1.7292	0.92804	0.86135		1.2041	0.96555	0.87869	0.75937	0.70793		2.0608	1.2306	0.85341	0.654	1.1808
5.6965	2.3486	1.6355	1.0492	1.0149		1.1964	0.94864	0.8837	0.85914	0.82248		1.3022	1.0301	0.77963	0.56013	0.76997
6.7948	2.6306	1.7428	1.029	1.106		1.4275	1.0447	0.92504	0.8425	0.89051		4.0225	2.0941	1.4369	0.93651	1.0005
5.536	2.4756	1.7026	0.9886	0.90917		1.2771	0.99712	0.91068	0.80924	0.73329		1.1699	0.77411	0.6141	0.4664	0.71045
4.442	2.1581	1.5843	1.0895	1.1621		1.2374	1.0026	0.93283	0.89244	0.94081		2.444	1.3754	1.0342	0.74802	0.97503
5.1788	2.3254	1.6871	1.1299	1.2444		1.2505	1.0022	0.94502	0.92575	1.0114		1.6918	1.1623	1.0233	0.93651	1.2248
5.5488	2.4773	1.7561	1.0088	1.2212		1.1385	0.96095	0.9076	0.82587	0.9915		4.865	1.9396	1.3107	1.031	1.096
4.1214	2.2146	1.6809	1.029	0.95667		1.1517	1.0049	0.95595	0.8425	0.78238		2.9723	1.511	1.1269	0.84219	1.1487
4.6489	2.3969	1.807	1.0895	1.0932		1.0834	0.96617	0.95026	0.89244	0.89517		1.9275	0.98954	0.75974	0.654	0.96099
5.0472	2.3822	1.7929	1.2107	1.3883		1.2808	1.0821	1.0346	0.99243	1.1313		3.2673	1.568	1.233	1.1256	1.5165
6.2759	2.5157	1.6755	0.96841	0.88243		1.1725	0.92632	0.85007	0.79261	0.71038		3.8343	1.7469	1.1276	0.74802	0.73767
6.7506	2.8184	1.8939	1.029	1.0681		1.3368	1.0756	0.98753	0.8425	0.87377		3.6667	2.3457	1.4956	0.84219	0.53516
6.3539	2.9327	2.1537	1.3722	1.3489		1.5296	1.242	1.1764	1.126	1.0925		5.1779	2.3259	1.6777	1.3153	0.86569
6.6636	3.1616	2.2329	1.1905	0.94209		1.4479	1.2215	1.1486	0.97575	0.77338		1.191	0.66675	0.57912	0.56013	0.80415
6.0826	3.0476	2.216	1.2914	1.329		1.3662	1.1987	1.1477	1.0592	1.0949		1.6209	1.2255	0.99483	0.74802	1.4212
6.8867	3.316	2.3611	1.2712	1.4393		1.5737	1.2972	1.2214	1.0425	1.1757		2.6973	1.6973	1.2883	0.93651	1.1151
7.6326	3.5073	2.4002	1.2712	1.6279		1.5848	1.3118	1.2167	1.0425	1.3176		2.6368	1.6781	1.2303	0.93651	1.2952
6.2318	3.0089	2.1787	1.3318	1.287		1.5494	1.2744	1.2019	1.0926	1.0441		2.2088	1.4503	1.1379	0.84219	0.94213
6.6198	3.0048	2.1772	1.3924	1.4014		1.7334	1.3482	1.2425	1.1427	1.1411		1.5984	1.1764	1.0018	0.93651	1.2374
5.6952	2.7555	2.0267	1.2511	1.161		1.4667	1.191	1.1183	1.0258	0.95474		2.4553	1.4309	1.0977	0.93651	0.67444
7.1697	3.0897	2.1642	1.352	1.3207		1.631	1.2703	1.1672	1.1093	1.083		4.3694	2.4465	1.7532	1.4104	0.83566
8.1734	3.4623	2.3172	1.2914	1.248		1.5324	1.2326	1.1381	1.0592	1.0233		1.9438	1.2681	1.1165	1.1256	0.96618
6.3837	3.0772	2.1498	1.3318	1.2748		1.3699	1.1694	1.0963	1.0926	1.0307		2.9976	2.2071	1.7892	1.4104	1.0628
5.4126	2.5828	1.8693	1.0895	1.2172		1.6325	1.2714	1.1358	0.89244	0.98488		1.7372	1.2435	1.0028	0.74802	1.1729
6.0204	3.0481	2.2008	1.3116	1.2361		1.3717	1.1998	1.1343	1.0759	1.0061		3.4193	2.2235	1.8643	1.6965	1.1033
5.5687	2.7962	2.0488	1.3318	1.3099		1.2317	1.115	1.0821	1.0926	1.0681		2.5334	1.7204	1.5527	1.4104	1.3104
4.5661	2.5022	1.9252	1.1501	1.3434		1.3733	1.191	1.1291	0.94241	1.1084		1.7761	0.9728	0.7599	0.56013	1.1811
5.9058	2.8339	2.0886	1.2914	1.3565		1.2491	1.0822	1.0658	1.0592	1.1041		2.352	1.3894	1.1211	1.031	1.3483
5.171	2.5354	1.9016	1.1905	1.057		1.4067	1.1611	1.094	0.97575	0.8551		2.0267	1.0913	0.88434	0.74802	0.76726
5.4805	2.4584	1.8132	1.3318	1.2155		1.3622	1.0926	1.0294	1.0926	0.98859		4.4607	3.1825	2.5101	1.984	1.1809
6.3901	2.7869	2.0151	1.2309	1.2163		1.6728	1.2627	1.1491	1.0091	1.0044		1.364	1.1008	1.0232	0.93651	0.92597
5.31	2.668	2.0174	1.2914	1.3565		1.5864	1.2712	1.1803	1.0592	1.094		1.9931	1.447	1.3526	1.3153	1.1246
5.7098	2.8006	2.1099	1.2712	1.5179		1.4889	1.2626	1.2011	1.0425	1.2522		2.0881	1.3688	1.1379	0.93651	1.1786
7.98	3.5249	2.3107	1.2309	1.0544		1.4872	1.2321	1.123	1.0091	0.8576		5.0058	3.2756	2.2284	1.2204	0.83021
5.0675	2.4692	1.9262	1.3318	1.1567		1.7653	1.3689	1.2497	1.0926	0.94685		3.23	1.644	1.2067	1.1256	1.1553
4.2588	2.3279	1.829	1.2309	1.3385		1.5187	1.2516	1.1638	1.0091	1.0849		2.0833	1.7661	1.5685	1.2204	1.1464
6.5512	3.1551	2.2109	1.1097	1.2671		1.459	1.2574	1.163	0.90909	1.0331		0.63864	0.4636	0.48359	0.56013	1.0333
5.892	2.6742	1.8662	1.1905	1.0932		1.5718	1.2174	1.0854	0.97575	0.88305		3.8403	1.9314	1.3618	0.93651	0.55122
4.732	2.4084	1.8306	1.1703	1.0878		1.0904	1.0075	1.0008	0.95908	0.88465		3.2322	1.1725	0.79456	0.654	0.77141
6.4822	2.9678	2.0486	1.3318	1.24		1.5118	1.1952	1.0964	1.0926	1.0055		3.5746	2.5018	2.0731	1.6965	0.90558
5.0689	2.3336	1.6657	1.0088	1.0412		1.144	0.92843	0.88	0.82587	0.85083		0.81294	0.4891	0.48503	0.56013	0.98362
9.5633	4.0873	2.6718	1.4126	1.4722		1.8512	1.4501	1.301	1.1595	1.1946		2.405	1.8986	1.6389	1.4104	1.3268
4.2246	2.2193	1.6935	1.1299	0.94574		1.4615	1.1835	1.0844	0.92575	0.7709		1.6031	1.074	0.88487	0.74802	0.47624
6.1879	2.5774	1.7531	0.9886	1.0824		1.2702	0.99315	0.90863	0.80924	0.88081		1.9884	1.1224	0.87046	0.74802	0.99284
4.3883	2.0101	1.4907	1.1097	1.1688		1.2811	0.96541	0.89471	0.90909	0.94749		2.1179	1.2835	1.2428	1.3153	0.53871
5.6282	2.6547	1.9492	1.1703	1.0415		1.4538	1.1944	1.1089	0.95908	0.84832		3.1389	1.1306	0.86796	0.74802	0.87205
4.8912	2.2144	1.6125	0.94823	0.88796		1.0959	0.93544	0.89186	0.77599	0.72612		2.5167	1.2452	0.83658	0.654	0.79164
7.752	3.3373	2.2085	1.0895	1.0243		1.5499	1.2334	1.1063	0.89244	0.82925		2.8429	1.6943	1.0638	0.654	0.8822
9.491	3.8512	2.3399	0.94823	0.87947		1.5457	1.1935	1.0426	0.77599	0.70863		2.8121	1.8976	1.1424	0.74802	0.71535
6.0608	2.799	1.9608	1.1501	0.91196		1.3565	1.0877	1.0068	0.94241	0.74186		1.3275	1.1273	1.0418	0.93651	0.24486
5.645	2.2114	1.4603	0.84731	0.65971		1.2454	0.88989	0.78279	0.69295	0.54119		2.3252	1.1366	0.82923	0.74802	0.65882
3.9996	1.9156	1.4113	0.94823	0.87322		1.3654	1.0252	0.91227	0.77599	0.71719		1.3569	0.77913	0.61762	0.4664	0.84275
4.7324	2.0524	1.4337	0.7464	0.62432		1.0559	0.83008	0.75756	0.61003	0.50617		1.8866	1.0299	0.67475	0.4664	0.2912
3.9935	1.9395	1.4958	1.0088	1.0317		1.2945	1.0064	0.93731	0.82587	0.83791		2.2556	1.418	1.1396	0.84219	0.60839
4.2492	2.0499	1.5192	0.96841	1.0383		0.92036	0.81233	0.79516	0.79261	0.84505		2.7139	1.1878	0.85611	0.74802	0.86215
4.2596	2.2066	1.6474	1.0895	1.144		1.1742	0.98921	0.9332	0.89244	0.93219		2.1387	1.5078	1.2453	0.93651	0.94409
5.3992	2.3179	1.6253	1.0693	1.0846		1.1478	0.90303	0.84811	0.87579	0.88689		5.5888	2.0003	1.21	0.93651	1.3557
7.3571	3.506	2.3534	1.2511	1.2259		1.4669	1.2461	1.151	1.0258	0.99185		3.0505	1.7636	1.3621	1.1256	1.0773
4.653	2.2897	1.7019	1.0492	1.2495		1.0641	0.96171	0.93258	0.85914	1.0225		3.443	2.0313	1.4774	1.1256	0.91902
8.4596	3.9965	2.7143	1.4732	1.557		1.6231	1.3754	1.297	1.2097	1.2609		6.0749	3.9434	2.7202	1.601	1.1344
7.6069	3.6613	2.5357	1.3722	1.4369		1.5005	1.3292	1.2647	1.126	1.1603		2.4551	1.5977	1.2769	0.93651	1.0931
7.1745	3.3812	2.3119	1.1905	0.99299		1.5236	1.2674	1.16	0.97575	0.81529		2.8453	1.7592	1.3788	1.1256	1.1039
6.9157	3.2425	2.2968	1.453	1.4864		1.5505	1.2587	1.1853	1.1929	1.2105		3.3161	2.2644	1.8495	1.601	0.97976
7.1197	3.266	2.336	1.4934	1.7622		1.6437	1.3409	1.2622	1.2264	1.4393		2.8965	2.0974	1.6648	1.3153	1.4425
4.4904	2.0669	1.5503	1.029	1.156		1.1889	0.95352	0.89761	0.8425	0.94541		2.4389	1.4563	1.1208	0.84219	1.3005
8.6987	3.7407	2.4529	1.3722	1.4185		1.7669	1.393	1.2494	1.126	1.1501		3.1135	2.0843	1.5782	1.1256	1.4779
7.7507	3.3656	2.3318	1.3722	1.5255		1.7529	1.3844	1.2673	1.126	1.2414		2.9591	1.6905	1.3333	1.1256	0.75301
5.2813	2.4099	1.767	1.1905	1.522		1.5012	1.1407	1.0438	0.97575	1.244		1.6968	1.4155	1.2696	1.031	0.8903
7.1028	3.216	2.2199	1.1097	1.134		1.552	1.2726	1.1616	0.90909	0.92043		2.1852	1.0066	0.80629	0.74802	0.65273
8.2668	3.7555	2.6032	1.3924	1.3808		1.6411	1.4136	1.3264	1.1427	1.1333		2.4902	1.2509	0.8913	0.74802	1.5656
8.0319	3.7586	2.6182	1.3722	1.3166		1.6807	1.4239	1.3317	1.126	1.0852		3.388	1.7024	1.2466	1.031	1.4805
8.4779	3.8821	2.6317	1.453	1.5212		1.8241	1.4721	1.3375	1.1929	1.2591		2.3219	1.4274	1.2861	1.2204	1.0592
7.5709	3.739	2.5983	1.4732	1.2989		1.6023	1.3848	1.2969	1.2097	1.0599		3.6312	2.6413	2.157	1.7922	0.59504
7.0916	3.421	2.4599	1.4126	1.3337		1.6866	1.4282	1.3384	1.1595	1.0839		4.8761	2.4389	1.6008	1.1256	1.0677
6.1971	3.0974	2.3132	1.2914	1.3742		1.6798	1.4135	1.3223	1.0592	1.1114		1.2218	0.77763	0.60111	0.4664	1.1581
9.3744	4.2316	2.8651	1.4732	1.3125		1.8911	1.5938	1.4489	1.2097	1.071		5.3784	3.2839	2.5734	2.0801	1.274
7.9659	3.6607	2.5746	1.4934	1.4023		1.7436	1.4646	1.3777	1.2264	1.1379		3.0866	1.9669	1.2375	0.654	0.66666
8.1452	3.5362	2.4962	1.5136	1.4515		1.7081	1.4457	1.3577	1.2432	1.2043		1.824	1.5759	1.3269	1.1256	1.1048
8.2394	3.7123	2.5332	1.3116	1.5523		1.6229	1.3524	1.2645	1.0759	1.2632		1.7305	1.3209	0.98956	0.654	1.2471
8.3474	3.635	2.4624	1.3116	1.4119		1.6866	1.392	1.2793	1.0759	1.1477		4.2903	2.3652	1.3058	0.654	1.2905
6.5327	3.0444	2.2989	1.4934	1.509		1.8858	1.4925	1.3861	1.2264	1.249		3.3348	1.5413	1.2241	1.1256	1.1987
5.0427	2.6716	2.0442	1.352	1.2395		1.5427	1.2834	1.205	1.1093	1.0022		3.7243	2.3055	1.8096	1.3153	1.0248
6.6027	3.0503	2.1638	1.1905	1.0897		1.5981	1.3139	1.2131	0.97575	0.8876		1.7039	1.0005	0.73384	0.56013	0.87994
7.6875	3.5307	2.4156	1.352	1.3553		1.8643	1.4919	1.327	1.1093	1.1023		2.5833	1.773	1.4638	1.1256	1.161
8.076	3.6129	2.4624	1.3722	1.3205		1.8053	1.4056	1.2767	1.126	1.0772		2.0623	1.6392	1.3935	1.031	1.5014
8.326	3.6384	2.5027	1.352	1.2993		2.1404	1.6302	1.4356	1.1093	1.061		2.5509	1.6225	1.2885	0.93651	1.065
8.339	3.7589	2.5691	1.352	1.2731		1.6601	1.4256	1.3233	1.1093	1.042		4.4	2.4993	1.6435	1.1256	1.2249
6.7105	3.1269	2.3073	1.4328	1.2829		1.7095	1.4247	1.3379	1.1762	1.0607		3.3802	1.8689	1.3572	0.84219	1.5908
9.8826	4.6241	3.0642	1.3722	1.3537		1.9295	1.6279	1.4774	1.126	1.1114		2.911	1.8721	1.5571	1.3153	0.97512
11.615	5.2035	3.3432	1.554	1.6952		2.1059	1.7695	1.5924	1.2767	1.3909		6.6722	3.1614	1.8422	1.2204	1.2147

## Sheet: voronoi indices
How to convert from the indexing used by the voronoi cells in the 3D skeleton (0, 10, 20, 30 um etc from the dorsal calyx) to the scales used on the figure (calyx to horizontal lobe, calyx to vertical lobe)
Indices in voronoiMask
	vertical lobe - distance from junction	peduncle and calyx - distance from junction	horizontal lobe - distance from junction	vstimFit	hstimFit	cstimFit			Distance from dorsal calyx	CtoHindices (indices in voronoiMask for this distance from dorsal calyx)	CtoVindices
1	0			0.000391096	0.370502	0.00246391			0	35	35
2	14.3084			0.000935231	0.551236	0.00149369			10	34	34
3		12.3978		0	0.279517	0.00406433			20	33	33
4			10.3164	0	0.431272	0.00149369			30	32	32
5	28.6167			0.00223642	0.742453	0.000905515			40	31	31
6		24.7956		0	0.210941	0.00670431			50	30	30
7			20.6327	0	0.560673	0.000905515			60	29	29
8	42.9251			0.00534797	1	0.000548948			70	28	28
9		37.1934		0	0.159239	0.0110591			80	27	27
10			30.9491	0	0.78465	0.000548948			90	26	26
11	57.2335			0.0127886	0.649837	0.000332787			100	24	24
12		49.5912		0	0.120247	0.0182425			110	21	21
13			41.2654	0	0.571562	0.000332787			120	18	18
14	71.5418			0.0305816	0.422287	0.000201745			130	15	15
15		61.989		0	0.0908313	0.0300918			140	12	12
16			51.5818	0	0.388723	0.000201745			150	9	9
17	85.8502			0.0731298	0.274418	0.000122303			160	6	6
18		74.3868		0	0.0686328	0.0496378			170	3	3
19			61.8981	0	0.264374	0.000122303			180	1	1
20	100.159			0.174876	0.178327	7.41e-05			190	4	2
21		86.7846		0	0.0518757	0.0818798			200	7	5
22			72.2145	0	0.179802	7.41e-05			210	10	8
23	114.467			0.418182	0.115883	4.49e-05			220	13	11
24		99.1824		0	0.0392223	0.135065			230	16	14
25	128.775			1	0.0753051	2.72e-05			240	19	17
26		111.58		0	0.0296645	0.222795			250	22	20
27		123.978		0	0.0224428	0.367511			260		23
28		136.376		0	0.0169845	0.606227			270		25
29		148.774		0	0.0128577	1
30		161.171		0	0.00973659	0.901851
31		173.569		0	0.00737539	0.813336
32		185.967		0	0.00558852	0.733508
33		198.365		0	0.00423586	0.661515
34		210.763		0	0.00321157	0.596588
35		223.161		0	0.00243571	0.538033
