# Supplementary material for: Localized inhibition in the Drosophila mushroom body
Source: eLife. 2020 Sep 21;9:e56954. doi: 10.7554/eLife.56954 (PMC7541083; doi:10.7554/eLife.56954)
Supplement: Supplementary file 2. [file elife-56954-supp2.xlsx]

## Sheet: Sheet1
Figure	Panel	Data	Statistical test	P value
Fig. 1	C	Electric shock group V	One sample Wilcoxon test with Holm-Bonferroni multiple comparisons correction	<0.001
		Electric shock group S		0.0034
		Electric shock group γ		<0.001
		Electric shock group H		0.0033
		Group V, S, γ, and H	Friedman test	<0.001
		Electric shock V vs S	Dunn's multiple comparisons test	0.002
		Electric shock V vs γ		<0.001
		Electric shock V vs H		0.004
		Electric shock S vs γ		>0.999
		Electric shock S vs H		>0.999
		Electric shock γ vs H		>0.999
		Odor Group V	One sample Wilcoxon test with Holm-Bonferroni multiple comparisons correction	0.0015
		Odor Group S		<0.001
		Odor Group γ		0.0034
		Odor Group H		0.0034
		Odor Group V, S, γ, and H	Friedman test	<0.001
		Odor V vs S	Dunn's multiple comparisons test	0.772
		Odor V vs γ		0.09
		Odor V vs H		>0.999
		Odor S vs γ		<0.001
		Odor S vs H		0.037
		Odor γ vs H		>0.999
Fig. 2-fig supp 1		Calyx before vs. +histamine	Paired t-test	0.0211
		Hor lobe before vs. +hist	Paired t-test	0.0058
		Vert lobe before vs. +hist	Wilcoxon test	0.0156
Fig. 3	I	853-GAL4, a v. a'	Paired t-tests with Holm-Bonferroni multiple comparisons correction	0.0236
		mb247-GAL, a v. a'		0.0488
		c739-GAL4, a v. a'		0.0399
		NP3061-GAL4, a v. a'		0.0402
Fig. 4		Stim calyx	Multiple t tests	<0.001
		Stim lobe		<0.001
		Stim calyx and stim lobe	Two-way Anova Row factor	0.98
			Two-way Anova Column factor	0.0575
			Two-way Anova Interaction	<0.001
		Response ratio (unstimulated site/stimulated site)	Paired t test	0.004
Fig. 5	F	Group H	One sample Wilcoxon test with Holm-Bonferroni multiple comparisons correction	0.006
		Group V		0.006
		Group C		0.084
		Group H, V, and C	Friedman test	<0.001
		Group H vs V	Dunn's multiple comparisons test	<0.001
		Group H vs C		0.742
	G	Group H	One sample Wilcoxon test with Holm-Bonferroni multiple comparisons correction	0.375
		Group V		0.006
		Group C		0.6446
		Group H, V, and C	Friedman test	<0.001
		Group V vs H	Dunn's multiple comparisons test	<0.001
		Group V vs C		0.003
	H	Group H	One sample t test with Holm-Bonferroni correction	0.1814
		Group V		0.7177
		Group C		<0.001
		Group H, V, and C	Repeated measures one-way Anova	<0.001
		Group C vs H	Holm-Sidak's multiple comparisons test	<0.001
		Group C vs V		<0.001
Fig. 7	A1	Green branch (node 200 vs 260)	Paired t test	<0.001
	A2	Group H	One sample t test with Holm-Bonferroni multiple comparisons correction	<0.001
		Group V		0.0022
		Group C		0.2057
		Group H, V, and C	Repeated measures one-way Anova	<0.001
		Group H vs V	Multiple comparisons	0.005
		Group H vs C		<0.001
		Green branch (node 200 vs 260)	Paired t test	<0.001
	A3	Group H	One sample Wilcoxon test with Holm-Bonferroni multiple comparisons correction	<0.001
		Group V		0.0048
		Group C		0.0479
		Group H, V, and C	Friedman test	<0.001
		Group H vs V	Dunn's multiple comparisons test	0.012
		Group H vs C		<0.001
		Green branch (node 200 vs 260)	Wilcoxon test	0.0017
	A4	Group H	One sample Wilcoxon test with Holm-Bonferroni multiple comparisons correction	0.006
		Group V		0.006
		Group C		0.0137
		Group H, V, and C	Friedman test	<0.001
		Group H vs V	Dunn's multiple comparisons test	0.0278
		Group H vs C		<0.001
		Green branch (node 200 vs 260)	paired t test	0.0033
	A5	Group H	One sample Wilcoxon test with Holm-Bonferroni multiple comparisons correction	<0.001
		Group V		0.0034
		Group C		0.0215
		Group H, V, and C	Friedman test	<0.001
		Group H vs V	Dunn's multiple comparisons test	0.007
		Group H vs C		<0.001
		Green branch (node 200 vs 260)	paired t test	0.0116
	B1	Same as Fig. 5	-	-
	B2	Group H	One sample t test with Holm-Bonferroni multiple comparisons correction	0.0052
		Group V		0.0057
		Group C		0.5626
		Group H, V, and C	Repeated measures one-way Anova	<0.001
		Group H vs V	Multiple comparisons	0.094
		Group V vs C		0.003
	B3	Group H	One sample t test with Holm-Bonferroni multiple comparisons correction	0.0015
		Group V		0.0026
		Group C		0.9204
		Group H, V, and C	Repeated measures one-way Anova	<0.001
		Group H vs V	Multiple comparisons	0.387
		Group V vs C		0.003
	B4	Group H	One sample Wilcoxon test with Holm-Bonferroni multiple comparisons correction	0.006
		Group V		0.006
		Group C		0.0371
		Group H, V, and C	Friedman test	0.0456
		Group H vs V	Dunn's multiple comparisons test	0.7422
		Group V vs C		0.0278
	B5	Group H	One sample Wilcoxon test with Holm-Bonferroni multiple comparisons correction	<0.001
		Group V		<0.001
		Group C		<0.001
		Group H, V, and C	Friedman test	0.018
		Group H vs V	Dunn's multiple comparisons test	0.866
		Group V vs C		0.012
	C1	Same as Fig. 5	-	-
	C2	Group H	One sample t test with Holm-Bonferroni multiple comparisons correction	0.0012
		Group V		0.007
		Group C		0.002
		Group H, V, and C	Repeated measures one-way Anova	<0.001
		Group C vs H	Multiple comparisons	<0.001
		Group C vs V		<0.001
	C3	Group H	One sample t test with Holm-Bonferroni multiple comparisons correction	<0.001
		Group V		0.0158
		Group C		0.0208
		Group H, V, and C	Repeated measures one-way Anova	<0.001
		Group C vs H	Multiple comparisons	0.001
		Group C vs V		0.093
	C4	Group H	One sample Wilcoxon test with Holm-Bonferroni multiple comparisons correction	0.0117
		Group V		0.0117
		Group C		0.2031
		Group H, V, and C	Friedman test	0.006
		Group C vs H	Dunn's multiple comparisons test	0.0044
		Group C vs V		0.1187
	C5	Group H	One sample t test with Holm-Bonferroni multiple comparisons correction	<0.001
		Group V		<0.001
		Group C		<0.001
		Group H, V, and C	Repeated measures one-way Anova	0.012
		Group C vs H	Multiple comparisons	0.049
		Group C vs V		0.276
Fig. 7-fig supp 1	A1	Group H	One sample t test with Holm-Bonferroni multiple comparisons correction	0.2246
		Group V		0.2191
		Group C		0.2934‬
		Group H, V, and C	Repeated measures one-way Anova	0.082
		Group H vs V	Multiple comparisons	0.738
		Group H vs C		0.738
		Green branch (node 200 vs 260)	Paired t test	0.2218
	B1	Group H	One sample t test with Holm-Bonferroni multiple comparisons correction	0.114
		Group V		0.2422
		Group C		0.531
		Group H, V, and C	Repeated measures one-way Anova	0.036
		Group H vs V	Multiple comparisons	0.069
		Group V vs C		0.158
	C1	Group H	One sample t test with Holm-Bonferroni multiple comparisons correction	0.0408
		Group V		0.0496
		Group C		0.0327
		Group H, V, and C	Repeated measures one-way Anova	0.149
		Group C vs H	Multiple comparisons	0.281
		Group C vs V		0.212
	A2	Group H	One sample t test with Holm-Bonferroni multiple comparisons correction	0.1542
		Group V		0.2168
		Group C		0.1665
		Group H, V, and C	Repeated measures one-way Anova	0.709
		Group H vs V	Multiple comparisons	0.934
		Group H vs C		0.718
		Green branch (node 200 vs 260)	Paired t test	0.9397
	B2	Group H	One sample t test with Holm-Bonferroni multiple comparisons correction	0.3649
		Group V		0.5698‬
		Group C		0.0783
		Group H, V, and C	Repeated measures one-way Anova	0.581
		Group H vs V	Multiple comparisons	0.995
		Group V vs C		0.483
	C2	Group H	One sample Wilcoxon test with Holm-Bonferroni multiple comparisons correction	0.1875
		Group V		0.25
		Group C		0.1875
		Group H, V, and C	Friedman test	0.124
		Group C vs H	Dunn's multiple comparisons test	0.116
		Group C vs V		0.116
Fig. 8	J	25 µm, all KCs	Wilcoxon test (vs. 1.0) with Holm-Bonferroni multiple comparisons correction	<0.0001
		50 µm, all KCs		<0.0001
		75 µm, all KCs		<0.0001
		Inf, all KCs		0.8371
		25 scrambled, all KCs		>0.9999
	K	25 µm, within subtype	Wilcoxon test (vs. 1.0) with Holm-Bonferroni multiple comparisons correction	<0.0001
		50 µm, within subtype		<0.0001
		75 µm, within subtype		<0.0001
		Inf, within subtype		0.9779
		25 scrambled, within subtype		>0.9999
	L	25 µm, APL-KC calyx only	Wilcoxon test (vs. 1.0) with Holm-Bonferroni multiple comparisons correction	<0.0001
		50 µm, APL-KC calyx only		<0.0001
		75 µm, APL-KC calyx only		<0.0001
		Inf, APL-KC calyx only		0.5356
		25 scrambled, APL-KC calyx only		0.5408
Fig. 8-fig supp 2	E, left	25 µm, all KCs	Wilcoxon test (vs. 1.0) with Holm-Bonferroni multiple comparisons correction	<0.0001
		50 µm, all KCs		<0.0001
		75 µm, all KCs		<0.0001
		Inf, all KCs		0.9307
		25 scrambled, all KCs		>0.9999
	E, mid	25 µm, within subtype	Wilcoxon test (vs. 1.0) with Holm-Bonferroni multiple comparisons correction	<0.0001
		50 µm, within subtype		<0.0001
		75 µm, within subtype		<0.0001
		Inf, within subtype		0.9779
		25 scrambled, within subtype		0.978
	E, right	25 µm, APL-KC calyx only	Wilcoxon test (vs. 1.0) with Holm-Bonferroni multiple comparisons correction	<0.0001
		50 µm, APL-KC calyx only		<0.0001
		75 µm, APL-KC calyx only		<0.0001
		Inf, APL-KC calyx only		0.2678
		25 scrambled, APL-KC calyx only		0.0642
	F, left	50 µm, all KCs	Wilcoxon test (vs. 1.0) with Holm-Bonferroni multiple comparisons correction	<0.0001
		95 µm, all KCs		<0.0001
		225 µm, all KCs		<0.0001
		448 µm, all KCs		<0.0001
		Inf, all KCs		0.8399
	F, mid	50 µm, all KCs	Wilcoxon test (vs. 1.0) with Holm-Bonferroni multiple comparisons correction	<0.0001
		95 µm, all KCs		<0.0001
		225 µm, all KCs		<0.0001
		448 µm, all KCs		0.0006
		Inf, all KCs		0.6728
	F, right	50 µm, all KCs	Wilcoxon test (vs. 1.0) with Holm-Bonferroni multiple comparisons correction	<0.0001
		95 µm, all KCs		<0.0001
		225 µm, all KCs		<0.0001
		448 µm, all KCs		0.399
		Inf, all KCs		0.5408
Fig. 8-fig supp 3	A	g-m	Wilcoxon test (vs. 1.0) with Holm-Bonferroni multiple comparisons correction	<0.0001
		g-t		0.0078
		g-d		<0.0001
		ab-p		<0.0001
		ab-s		<0.0001
		ab-m		<0.0001
		ab-c		<0.0001
		a'b'-ap1		<0.0001
		a'b'-ap2		<0.0001
		a'b'-m		<0.0001
		a'b'-m		<0.0001
	B	g-m	Wilcoxon test (vs. 1.0) with Holm-Bonferroni multiple comparisons correction	<0.0001
		g-t		0.2968
		g-d		<0.0001
		ab-p		0.7216
		ab-s		<0.0001
		ab-m		<0.0001
		ab-c		<0.0001
		a'b'-ap1		<0.0001
		a'b'-ap2		0.0171
		a'b'-m		<0.0001
		a'b'-m		<0.0001
Decay constants (distance to reach 1/e) for curve fits of red dye in Fig. 8
	Stimulus location	Branch	direction of decay	Decay constant (µm)
	H stim	H	to calyx	38.11
			to lobe tip	25.94
		V	to calyx	33.58
			to lobe tip	23.2
	V stim	V	to calyx	11.47
	C stim	H/V	to calyx	96.8
			to lobe tips	19.98
